# Supplementary material for: Evaluation of Different Anthropometric Indicators for Screening for Nonalcoholic Fatty Liver Disease in Elderly Individuals
Source: Hindawi journal article supplement (doi:10.1155/2021/6678755), 2021-01-28
Supplement: f1 [file 6678755.f1.pdf]

| 年齡 | 是否高血 | 是否糖尿 | 是否老年 | 性別 | 血壓左側   | 血壓左側  | 血壓右側   | 血壓右側  |
|----|------|------|------|----|--------|-------|--------|-------|
| 70 | 是    | 否    | 是    | 女  | 130.00 | 70.00 | 135.00 | 80.00 |
| 73 | 否    | 否    | 是    | 女  | 135.00 | 85.00 | 140.00 | 90.00 |
| 67 | 否    | 否    | 是    | 女  | 118.00 | 70.00 | 126.00 | 73.00 |
| 68 | 否    | 否    | 是    | 女  | 120.00 | 82.00 | 130.00 | 90.00 |
| 71 | 是    | 是    | 是    | 女  | 130.00 | 80.00 | 135.00 | 82.00 |
| 71 | 否    | 否    | 是    | 女  | 118.00 | 73.00 | 121.00 | 68.00 |
| 74 | 是    | 否    | 是    | 女  | 125.00 | 80.00 | 130.00 | 80.00 |
| 72 | 是    | 否    | 是    | 女  | 140.00 | 86.00 | 159.00 | 96.00 |
| 66 | 是    | 否    | 是    | 女  | 130.00 | 80.00 | 120.00 | 80.00 |
| 68 | 是    | 是    | 是    | 女  | 120.00 | 72.00 | 132.00 | 80.00 |
| 68 | 否    | 否    | 是    | 女  | 108.00 | 72.00 | 112.00 | 78.00 |
| 75 | 否    | 否    | 是    | 女  | 124.00 | 82.00 | 130.00 | 76.00 |
| 77 | 否    | 否    | 是    | 女  | 130.00 | 70.00 | 138.00 | 78.00 |
| 77 | 是    | 否    | 是    | 女  | 134.00 | 80.00 | 139.00 | 85.00 |
| 66 | 否    | 否    | 是    | 女  | 110.00 | 70.00 | 120.00 | 72.00 |
| 70 | 否    | 否    | 是    | 女  | 110.00 | 60.00 | 105.00 | 60.00 |
| 69 | 否    | 否    | 是    | 女  | 138.00 | 80.00 | 135.00 | 80.00 |
| 68 | 否    | 否    | 是    | 女  | 151.00 | 80.00 | 148.00 | 75.00 |
| 68 | 是    | 否    | 是    | 女  | 126.00 | 78.00 | 130.00 | 80.00 |
| 69 | 否    | 否    | 是    | 女  | 106.00 | 70.00 | 110.00 | 70.00 |
| 76 | 否    | 否    | 是    | 女  | 112.00 | 80.00 | 116.00 | 60.00 |
| 69 | 否    | 否    | 是    | 女  | 133.00 | 73.00 | 135.00 | 80.00 |
| 73 | 是    | 是    | 是    | 女  | 140.00 | 88.00 | 132.00 | 82.00 |
| 68 | 是    | 是    | 是    | 女  | 145.00 | 86.00 | 142.00 | 78.00 |
| 67 | 否    | 否    | 是    | 女  | 135.00 | 79.00 | 136.00 | 73.00 |
| 69 | 否    | 否    | 是    | 女  | 138.00 | 86.00 | 144.00 | 93.00 |
| 70 | 是    | 是    | 是    | 女  | 107.00 | 78.00 | 121.00 | 85.00 |
| 73 | 是    | 否    | 是    | 女  | 135.00 | 75.00 | 131.00 | 79.00 |
| 68 | 是    | 否    | 是    | 女  | 150.00 | 82.00 | 157.00 | 88.00 |
| 78 | 是    | 是    | 是    | 女  | 146.00 | 87.00 | 144.00 | 85.00 |
| 89 | 是    | 否    | 是    | 女  | 158.00 | 76.00 | 159.00 | 72.00 |
| 87 | 否    | 否    | 是    | 女  | 138.00 | 86.00 | 143.00 | 83.00 |
| 70 | 是    | 否    | 是    | 女  | 110.00 | 70.00 | 108.00 | 68.00 |
| 66 | 是    | 否    | 是    | 女  | 176.00 | 90.00 | 182.00 | 92.00 |
| 69 | 是    | 是    | 是    | 女  | 120.00 | 82.00 | 124.00 | 80.00 |
| 66 | 否    | 否    | 是    | 女  | 110.00 | 68.00 | 112.00 | 70.00 |
| 68 | 是    | 是    | 是    | 女  | 140.00 | 75.00 | 142.00 | 80.00 |
| 66 | 否    | 否    | 是    | 女  | 150.00 | 82.00 | 162.00 | 74.00 |
| 71 | 是    | 否    | 是    | 女  | 130.00 | 80.00 | 135.00 | 78.00 |
| 68 | 是    | 否    | 是    | 女  | 122.00 | 81.00 | 125.00 | 83.00 |
| 76 | 否    | 否    | 是    | 女  | 155.00 | 78.00 | 160.00 | 78.00 |
| 68 | 否    | 否    | 是    | 女  | 150.00 | 86.00 | 158.00 | 90.00 |
| 72 | 否    | 否    | 是    | 女  | 123.00 | 68.00 | 122.00 | 65.00 |
| 71 | 是    | 否    | 是    | 女  | 140.00 | 70.00 | 138.00 | 74.00 |
| 71 | 是    | 是    | 是    | 女  | 110.00 | 82.00 | 113.00 | 82.00 |
| 75 | 否    | 否    | 是    | 女  | 110.00 | 75.00 | 114.00 | 79.00 |
| 75 | 否    | 否    | 是    | 女  | 105.00 | 76.00 | 110.00 | 70.00 |
| 71 | 否    | 否    | 是    | 女  | 158.00 | 99.00 | 167.00 | 89.00 |
| 66 | 是    | 否    | 是    | 女  | 135.00 | 80.00 | 138.00 | 84.00 |
| 71 | 否    | 否    | 是    | 女  | 130.00 | 74.00 | 130.00 | 76.00 |

|    |    |    |   |   |        |        |        |        |
|----|----|----|---|---|--------|--------|--------|--------|
| 87 | 是  | 否  | 是 | 女 | 116.00 | 60.00  | 127.00 | 61.00  |
| 91 | 是否 | 否  | 是 | 女 | 110.00 | 70.00  | 108.00 | 68.00  |
| 70 | 是  | 否  | 是 | 女 | 128.00 | 82.00  | 130.00 | 85.00  |
| 77 | 是  | 否  | 是 | 女 | 142.00 | 81.00  | 129.00 | 73.00  |
| 74 | 是  | 是  | 是 | 女 | 136.00 | 60.00  | 138.00 | 60.00  |
| 70 | 是  | 是  | 是 | 女 | 150.00 | 80.00  | 145.00 | 80.00  |
| 74 | 是  | 是否 | 是 | 女 | 142.00 | 76.00  | 140.00 | 76.00  |
| 69 | 是  | 是  | 是 | 女 | 148.00 | 84.00  | 146.00 | 82.00  |
| 73 | 是  | 是  | 是 | 女 | 158.00 | 78.00  | 148.00 | 75.00  |
| 70 | 是否 | 是否 | 是 | 女 | 131.00 | 71.00  | 132.00 | 75.00  |
| 67 | 是  | 否  | 是 | 女 | 144.00 | 98.00  | 145.00 | 99.00  |
| 87 | 是  | 否  | 是 | 女 | 100.00 | 70.00  | 106.00 | 77.00  |
| 73 | 是  | 否  | 是 | 女 | 147.00 | 86.00  | 147.00 | 77.00  |
| 75 | 是  | 是  | 是 | 女 | 145.00 | 107.00 | 163.00 | 109.00 |
| 80 | 是否 | 是否 | 是 | 女 | 138.00 | 88.00  | 145.00 | 64.00  |
| 72 | 是  | 否  | 是 | 女 | 120.00 | 80.00  | 128.00 | 85.00  |
| 69 | 是否 | 否  | 是 | 女 | 111.00 | 62.00  | 116.00 | 68.00  |
| 69 | 是  | 否  | 是 | 女 | 148.00 | 86.00  | 145.00 | 88.00  |
| 76 | 是  | 否  | 是 | 女 | 121.00 | 71.00  | 120.00 | 70.00  |
| 75 | 是  | 否  | 是 | 女 | 124.00 | 80.00  | 130.00 | 76.00  |
| 75 | 是  | 是  | 是 | 女 | 139.00 | 78.00  | 141.00 | 89.00  |
| 68 | 是否 | 是  | 是 | 女 | 130.00 | 78.00  | 132.00 | 80.00  |
| 68 | 否  | 否  | 是 | 女 | 120.00 | 76.00  | 128.00 | 78.00  |
| 69 | 否  | 否  | 是 | 女 | 129.00 | 68.00  | 135.00 | 72.00  |
| 75 | 是  | 否  | 是 | 女 | 138.00 | 60.00  | 146.00 | 64.00  |
| 71 | 是  | 否  | 是 | 女 | 120.00 | 73.00  | 134.00 | 84.00  |
| 90 | 是  | 是  | 是 | 女 | 150.00 | 71.00  | 151.00 | 75.00  |
| 66 | 是否 | 是否 | 是 | 女 | 124.00 | 86.00  | 121.00 | 79.00  |
| 69 | 是  | 否  | 是 | 女 | 131.00 | 89.00  | 129.00 | 90.00  |
| 77 | 否  | 否  | 是 | 女 | 125.00 | 75.00  | 130.00 | 80.00  |
| 70 | 否  | 否  | 是 | 女 | 116.00 | 56.00  | 112.00 | 58.00  |
| 72 | 是  | 否  | 是 | 女 | 118.00 | 68.00  | 121.00 | 72.00  |
| 78 | 是  | 否  | 是 | 女 | 127.00 | 68.00  | 124.00 | 68.00  |
| 83 | 是  | 否  | 是 | 女 | 150.00 | 85.00  | 154.00 | 90.00  |
| 74 | 是  | 否  | 是 | 女 | 125.00 | 77.00  | 126.00 | 86.00  |
| 66 | 是否 | 否  | 是 | 女 | 110.00 | 80.00  | 118.00 | 74.00  |
| 74 | 是  | 是  | 是 | 女 | 126.00 | 78.00  | 130.00 | 80.00  |
| 68 | 是否 | 否  | 是 | 女 | 122.00 | 77.00  | 121.00 | 75.00  |
| 70 | 是  | 否  | 是 | 女 | 133.00 | 79.00  | 139.00 | 80.00  |
| 68 | 是否 | 否  | 是 | 女 | 105.00 | 65.00  | 110.00 | 70.00  |
| 66 | 否  | 否  | 是 | 女 | 137.00 | 89.00  | 139.00 | 88.00  |
| 82 | 是  | 否  | 是 | 女 | 155.00 | 80.00  | 157.00 | 80.00  |
| 73 | 是  | 是  | 是 | 女 | 130.00 | 70.00  | 148.00 | 81.00  |
| 77 | 是  | 是  | 是 | 女 | 181.00 | 106.00 | 189.00 | 100.00 |
| 68 | 是否 | 是否 | 是 | 女 | 146.00 | 84.00  | 155.00 | 88.00  |
| 72 | 是  | 否  | 是 | 女 | 130.00 | 82.00  | 134.00 | 80.00  |
| 66 | 是否 | 否  | 是 | 女 | 180.00 | 100.00 | 182.00 | 110.00 |
| 72 | 否  | 否  | 是 | 女 | 130.00 | 80.00  | 125.00 | 74.00  |
| 77 | 是  | 否  | 是 | 女 | 132.00 | 80.00  | 130.00 | 80.00  |
| 78 | 是否 | 否  | 是 | 女 | 150.00 | 90.00  | 160.00 | 70.00  |
| 66 | 否  | 否  | 是 | 女 | 90.00  | 60.00  | 92.00  | 62.00  |

|    |   |   |   |   |        |        |        |        |
|----|---|---|---|---|--------|--------|--------|--------|
| 66 | 否 | 否 | 是 | 女 | 106.00 | 72.00  | 104.00 | 70.00  |
| 79 | 否 | 否 | 是 | 女 | 106.00 | 62.00  | 110.00 | 68.00  |
| 69 | 否 | 否 | 是 | 女 | 118.00 | 74.00  | 122.00 | 76.00  |
| 74 | 是 | 否 | 是 | 女 | 130.00 | 80.00  | 138.00 | 88.00  |
| 66 | 否 | 否 | 是 | 女 | 150.00 | 89.00  | 152.00 | 90.00  |
| 79 | 是 | 否 | 是 | 女 | 144.00 | 78.00  | 139.00 | 79.00  |
| 67 | 是 | 是 | 是 | 女 | 126.00 | 70.00  | 131.00 | 78.00  |
| 77 | 否 | 否 | 是 | 女 | 133.00 | 79.00  | 135.00 | 82.00  |
| 71 | 否 | 否 | 是 | 女 | 135.00 | 82.00  | 137.00 | 84.00  |
| 66 | 否 | 否 | 是 | 女 | 135.00 | 70.00  | 135.00 | 80.00  |
| 66 | 否 | 否 | 是 | 女 | 190.00 | 100.00 | 201.00 | 110.00 |
| 69 | 否 | 否 | 是 | 女 | 120.00 | 70.00  | 126.00 | 78.00  |
| 67 | 否 | 否 | 是 | 女 | 148.00 | 78.00  | 150.00 | 80.00  |
| 70 | 是 | 否 | 是 | 女 | 136.00 | 65.00  | 139.00 | 72.00  |
| 71 | 否 | 否 | 是 | 女 | 126.00 | 70.00  | 125.00 | 68.00  |
| 69 | 否 | 否 | 是 | 女 | 120.00 | 70.00  | 122.00 | 70.00  |
| 67 | 否 | 否 | 是 | 女 | 130.00 | 75.00  | 136.00 | 76.00  |
| 72 | 是 | 否 | 是 | 女 | 190.00 | 106.00 | 185.00 | 107.00 |
| 76 | 否 | 否 | 是 | 女 | 110.00 | 68.00  | 112.00 | 70.00  |
| 68 | 是 | 否 | 是 | 女 | 120.00 | 75.00  | 130.00 | 78.00  |
| 72 | 否 | 否 | 是 | 女 | 126.00 | 68.00  | 130.00 | 70.00  |
| 68 | 否 | 否 | 是 | 女 | 123.00 | 84.00  | 120.00 | 74.00  |
| 66 | 否 | 否 | 是 | 女 | 128.00 | 82.00  | 133.00 | 85.00  |
| 74 | 否 | 否 | 是 | 女 | 128.00 | 76.00  | 130.00 | 77.00  |
| 74 | 否 | 否 | 是 | 女 | 135.00 | 85.00  | 135.00 | 82.00  |
| 72 | 否 | 否 | 是 | 女 | 128.00 | 72.00  | 126.00 | 70.00  |
| 83 | 是 | 否 | 是 | 女 | 130.00 | 80.00  | 140.00 | 78.00  |
| 76 | 是 | 否 | 是 | 女 | 144.00 | 90.00  | 153.00 | 89.00  |
| 70 | 否 | 否 | 是 | 女 | 128.00 | 79.00  | 130.00 | 88.00  |
| 70 | 否 | 是 | 是 | 女 | 125.00 | 75.00  | 130.00 | 80.00  |
| 76 | 是 | 是 | 是 | 女 | 151.00 | 83.00  | 154.00 | 74.00  |
| 69 | 是 | 是 | 是 | 女 | 140.00 | 84.00  | 142.00 | 86.00  |
| 73 | 是 | 否 | 是 | 女 | 135.00 | 78.00  | 138.00 | 82.00  |
| 74 | 否 | 否 | 是 | 女 | 150.00 | 89.00  | 160.00 | 90.00  |
| 77 | 是 | 否 | 是 | 女 | 134.00 | 84.00  | 139.00 | 89.00  |
| 75 | 是 | 否 | 是 | 女 | 132.00 | 82.00  | 130.00 | 84.00  |
| 71 | 是 | 否 | 是 | 女 | 138.00 | 80.00  | 135.00 | 80.00  |
| 67 | 是 | 否 | 是 | 女 | 142.00 | 91.00  | 142.00 | 92.00  |
| 66 | 否 | 否 | 是 | 女 | 118.00 | 62.00  | 110.00 | 60.00  |
| 71 | 否 | 否 | 是 | 女 | 130.00 | 82.00  | 132.00 | 84.00  |
| 75 | 是 | 否 | 是 | 女 | 166.00 | 99.00  | 143.00 | 95.00  |
| 75 | 否 | 是 | 是 | 女 | 125.00 | 70.00  | 128.00 | 78.00  |
| 67 | 是 | 是 | 是 | 女 | 148.00 | 83.00  | 132.00 | 77.00  |
| 67 | 否 | 否 | 是 | 女 | 101.00 | 68.00  | 100.00 | 70.00  |
| 75 | 是 | 否 | 是 | 女 | 143.00 | 83.00  | 150.00 | 87.00  |
| 71 | 否 | 否 | 是 | 女 | 136.00 | 68.00  | 139.00 | 70.00  |
| 72 | 是 | 否 | 是 | 女 | 200.00 | 85.00  | 208.00 | 94.00  |
| 66 | 否 | 否 | 是 | 女 | 116.00 | 81.00  | 129.00 | 87.00  |
| 71 | 否 | 否 | 是 | 女 | 130.00 | 68.00  | 137.00 | 70.00  |
| 74 | 否 | 是 | 是 | 女 | 139.00 | 80.00  | 126.00 | 78.00  |
| 80 | 是 | 否 | 是 | 女 | 135.00 | 78.00  | 140.00 | 80.00  |

|    |   |   |   |   |        |       |        |       |
|----|---|---|---|---|--------|-------|--------|-------|
| 69 | 否 | 否 | 是 | 女 | 110.00 | 68.00 | 112.00 | 68.00 |
| 69 | 是 | 否 | 是 | 女 | 127.00 | 70.00 | 131.00 | 74.00 |
| 69 | 是 | 否 | 是 | 女 | 138.00 | 78.00 | 139.00 | 80.00 |
| 76 | 是 | 否 | 是 | 女 | 110.00 | 70.00 | 120.00 | 78.00 |
| 66 | 否 | 否 | 是 | 女 | 135.00 | 86.00 | 137.00 | 85.00 |
| 69 | 是 | 否 | 是 | 女 | 136.00 | 78.00 | 139.00 | 80.00 |
| 66 | 是 | 否 | 是 | 女 | 123.00 | 70.00 | 132.00 | 73.00 |
| 72 | 否 | 否 | 是 | 女 | 110.00 | 70.00 | 118.00 | 70.00 |
| 81 | 是 | 是 | 是 | 女 | 130.00 | 60.00 | 125.00 | 70.00 |
| 69 | 是 | 否 | 是 | 女 | 147.00 | 91.00 | 159.00 | 94.00 |
| 73 | 是 | 否 | 是 | 女 | 152.00 | 97.00 | 144.00 | 91.00 |
| 66 | 是 | 是 | 是 | 女 | 120.00 | 78.00 | 130.00 | 80.00 |
| 86 | 否 | 否 | 是 | 女 | 114.00 | 68.00 | 116.00 | 70.00 |
| 77 | 否 | 否 | 是 | 女 | 140.00 | 75.00 | 143.00 | 72.00 |
| 66 | 否 | 否 | 是 | 女 | 108.00 | 64.00 | 118.00 | 64.00 |
| 82 | 是 | 否 | 是 | 女 | 150.00 | 62.00 | 150.00 | 80.00 |
| 68 | 是 | 是 | 是 | 女 | 143.00 | 86.00 | 142.00 | 84.00 |
| 67 | 否 | 否 | 是 | 女 | 105.00 | 70.00 | 108.00 | 68.00 |
| 73 | 否 | 否 | 是 | 女 | 126.00 | 70.00 | 130.00 | 70.00 |
| 72 | 是 | 否 | 是 | 女 | 139.00 | 85.00 | 139.00 | 89.00 |
| 78 | 否 | 否 | 是 | 女 | 138.00 | 66.00 | 141.00 | 68.00 |
| 76 | 是 | 否 | 是 | 女 | 170.00 | 75.00 | 172.00 | 73.00 |
| 67 | 否 | 否 | 是 | 女 | 140.00 | 88.00 | 140.00 | 84.00 |
| 68 | 是 | 否 | 是 | 女 | 124.00 | 82.00 | 126.00 | 82.00 |
| 74 | 是 | 否 | 是 | 女 | 167.00 | 97.00 | 166.00 | 89.00 |
| 72 | 是 | 否 | 是 | 女 | 150.00 | 80.00 | 151.00 | 83.00 |
| 74 | 是 | 是 | 是 | 女 | 138.00 | 76.00 | 140.00 | 70.00 |
| 81 | 是 | 是 | 是 | 女 | 130.00 | 70.00 | 131.00 | 68.00 |
| 78 | 否 | 否 | 是 | 女 | 126.00 | 79.00 | 128.00 | 80.00 |
| 71 | 否 | 否 | 是 | 女 | 115.00 | 84.00 | 120.00 | 84.00 |
| 79 | 是 | 否 | 是 | 女 | 138.00 | 68.00 | 140.00 | 70.00 |
| 70 | 是 | 否 | 是 | 女 | 116.00 | 70.00 | 118.00 | 70.00 |
| 70 | 是 | 否 | 是 | 女 | 120.00 | 78.00 | 120.00 | 80.00 |
| 71 | 否 | 否 | 是 | 女 | 126.00 | 80.00 | 130.00 | 84.00 |
| 68 | 否 | 否 | 是 | 女 | 100.00 | 66.00 | 112.00 | 70.00 |
| 71 | 否 | 否 | 是 | 女 | 116.00 | 67.00 | 120.00 | 70.00 |
| 86 | 否 | 否 | 是 | 女 | 120.00 | 70.00 | 122.00 | 74.00 |
| 75 | 否 | 是 | 是 | 女 | 138.00 | 82.00 | 120.00 | 70.00 |
| 71 | 是 | 否 | 是 | 女 | 160.00 | 74.00 | 161.00 | 84.00 |
| 81 | 是 | 是 | 是 | 女 | 152.00 | 70.00 | 150.00 | 70.00 |
| 84 | 是 | 否 | 是 | 女 | 130.00 | 80.00 | 140.00 | 80.00 |
| 75 | 否 | 否 | 是 | 女 | 115.00 | 81.00 | 110.00 | 80.00 |
| 68 | 是 | 是 | 是 | 女 | 142.00 | 88.00 | 148.00 | 90.00 |
| 79 | 否 | 否 | 是 | 女 | 136.00 | 58.00 | 138.00 | 60.00 |
| 83 | 是 | 否 | 是 | 女 | 102.00 | 60.00 | 100.00 | 60.00 |
| 89 | 否 | 否 | 是 | 女 | 120.00 | 70.00 | 122.00 | 72.00 |
| 80 | 否 | 否 | 是 | 女 | 140.00 | 70.00 | 140.00 | 60.00 |
| 80 | 否 | 否 | 是 | 女 | 110.00 | 74.00 | 120.00 | 80.00 |
| 67 | 否 | 否 | 是 | 女 | 128.00 | 80.00 | 130.00 | 82.00 |
| 73 | 否 | 否 | 是 | 女 | 110.00 | 61.00 | 112.00 | 62.00 |
| 68 | 是 | 否 | 是 | 女 | 142.00 | 90.00 | 144.00 | 92.00 |

|    |   |   |   |   |        |        |        |        |
|----|---|---|---|---|--------|--------|--------|--------|
| 80 | 是 | 是 | 是 | 女 | 123.00 | 70.00  | 126.00 | 78.00  |
| 66 | 是 | 否 | 是 | 女 | 142.00 | 72.00  | 152.00 | 84.00  |
| 69 | 否 | 否 | 是 | 女 | 170.00 | 100.00 | 170.00 | 90.00  |
| 78 | 否 | 否 | 是 | 女 | 129.00 | 90.00  | 125.00 | 94.00  |
| 69 | 否 | 否 | 是 | 女 | 120.00 | 70.00  | 124.00 | 74.00  |
| 67 | 是 | 是 | 是 | 女 | 139.00 | 72.00  | 144.00 | 71.00  |
| 78 | 是 | 否 | 是 | 女 | 120.00 | 76.00  | 120.00 | 70.00  |
| 75 | 是 | 否 | 是 | 女 | 168.00 | 69.00  | 165.00 | 80.00  |
| 79 | 否 | 是 | 是 | 女 | 121.00 | 73.00  | 124.00 | 76.00  |
| 81 | 是 | 是 | 是 | 女 | 130.00 | 71.00  | 130.00 | 70.00  |
| 87 | 否 | 否 | 是 | 女 | 160.00 | 70.00  | 166.00 | 70.00  |
| 75 | 是 | 否 | 是 | 女 | 110.00 | 74.00  | 109.00 | 73.00  |
| 68 | 是 | 否 | 是 | 女 | 124.00 | 88.00  | 122.00 | 78.00  |
| 78 | 否 | 否 | 是 | 女 | 145.00 | 81.00  | 142.00 | 80.00  |
| 76 | 否 | 否 | 是 | 女 | 136.00 | 70.00  | 139.00 | 72.00  |
| 72 | 是 | 否 | 是 | 女 | 144.00 | 96.00  | 146.00 | 98.00  |
| 71 | 否 | 否 | 是 | 女 | 136.00 | 80.00  | 140.00 | 80.00  |
| 72 | 否 | 否 | 是 | 女 | 120.00 | 64.00  | 116.00 | 72.00  |
| 70 | 是 | 否 | 是 | 女 | 131.00 | 94.00  | 133.00 | 95.00  |
| 71 | 否 | 否 | 是 | 女 | 120.00 | 70.00  | 126.00 | 74.00  |
| 89 | 是 | 否 | 是 | 女 | 130.00 | 70.00  | 132.00 | 70.00  |
| 85 | 否 | 否 | 是 | 女 | 126.00 | 68.00  | 130.00 | 70.00  |
| 73 | 是 | 否 | 是 | 女 | 134.00 | 80.00  | 139.00 | 85.00  |
| 74 | 是 | 否 | 是 | 女 | 145.00 | 67.00  | 141.00 | 81.00  |
| 80 | 否 | 否 | 是 | 女 | 140.00 | 76.00  | 144.00 | 80.00  |
| 67 | 否 | 否 | 是 | 女 | 121.00 | 60.00  | 135.00 | 69.00  |
| 67 | 否 | 否 | 是 | 女 | 125.00 | 88.00  | 120.00 | 85.00  |
| 75 | 否 | 否 | 是 | 女 | 107.00 | 70.00  | 100.00 | 70.00  |
| 68 | 是 | 否 | 是 | 女 | 130.00 | 80.00  | 123.00 | 78.00  |
| 68 | 是 | 否 | 是 | 女 | 130.00 | 75.00  | 132.00 | 80.00  |
| 73 | 否 | 否 | 是 | 女 | 130.00 | 74.00  | 130.00 | 75.00  |
| 68 | 否 | 否 | 是 | 女 | 124.00 | 76.00  | 126.00 | 78.00  |
| 71 | 否 | 否 | 是 | 女 | 135.00 | 81.00  | 132.00 | 80.00  |
| 70 | 否 | 否 | 是 | 女 | 109.00 | 65.00  | 115.00 | 80.00  |
| 77 | 是 | 否 | 是 | 女 | 104.00 | 63.00  | 105.00 | 64.00  |
| 70 | 否 | 否 | 是 | 女 | 140.00 | 72.00  | 130.00 | 79.00  |
| 78 | 是 | 否 | 是 | 女 | 156.00 | 84.00  | 152.00 | 86.00  |
| 71 | 否 | 否 | 是 | 女 | 140.00 | 93.00  | 145.00 | 84.00  |
| 80 | 否 | 否 | 是 | 女 | 126.00 | 78.00  | 130.00 | 78.00  |
| 87 | 否 | 否 | 是 | 女 | 140.00 | 80.00  | 136.00 | 78.00  |
| 79 | 是 | 否 | 是 | 女 | 116.00 | 76.00  | 119.00 | 74.00  |
| 71 | 否 | 否 | 是 | 女 | 145.00 | 79.00  | 158.00 | 88.00  |
| 72 | 否 | 否 | 是 | 女 | 136.00 | 70.00  | 138.00 | 75.00  |
| 70 | 是 | 是 | 是 | 女 | 152.00 | 70.00  | 150.00 | 74.00  |
| 68 | 否 | 否 | 是 | 女 | 110.00 | 76.00  | 115.00 | 75.00  |
| 75 | 否 | 否 | 是 | 女 | 168.00 | 72.00  | 164.00 | 82.00  |
| 67 | 否 | 否 | 是 | 女 | 136.00 | 70.00  | 138.00 | 78.00  |
| 79 | 否 | 否 | 是 | 女 | 145.00 | 95.00  | 150.00 | 100.00 |
| 66 | 否 | 否 | 是 | 女 | 108.00 | 68.00  | 110.00 | 70.00  |
| 77 | 否 | 否 | 是 | 女 | 110.00 | 85.00  | 113.00 | 89.00  |
| 71 | 否 | 否 | 是 | 女 | 147.00 | 79.00  | 153.00 | 83.00  |

|    |   |   |   |   |        |       |        |       |
|----|---|---|---|---|--------|-------|--------|-------|
| 71 | 否 | 否 | 是 | 女 | 129.00 | 76.00 | 139.00 | 79.00 |
| 74 | 否 | 否 | 是 | 女 | 134.00 | 76.00 | 136.00 | 78.00 |
| 87 | 是 | 是 | 是 | 女 | 130.00 | 65.00 | 133.00 | 73.00 |
| 69 | 否 | 否 | 是 | 女 | 120.00 | 76.00 | 115.00 | 77.00 |
| 75 | 是 | 否 | 是 | 女 | 132.00 | 75.00 | 130.00 | 75.00 |
| 72 | 是 | 是 | 是 | 女 | 155.00 | 72.00 | 132.00 | 78.00 |
| 73 | 否 | 是 | 是 | 女 | 98.00  | 66.00 | 100.00 | 70.00 |
| 80 | 是 | 否 | 是 | 女 | 114.00 | 62.00 | 116.00 | 65.00 |
| 71 | 否 | 否 | 是 | 女 | 125.00 | 74.00 | 128.00 | 76.00 |
| 69 | 否 | 否 | 是 | 女 | 135.00 | 80.00 | 132.00 | 78.00 |
| 67 | 否 | 否 | 是 | 女 | 120.00 | 70.00 | 127.00 | 80.00 |
| 68 | 是 | 否 | 是 | 女 | 142.00 | 89.00 | 139.00 | 88.00 |
| 75 | 是 | 是 | 是 | 女 | 136.00 | 64.00 | 130.00 | 60.00 |
| 69 | 否 | 否 | 是 | 女 | 108.00 | 66.00 | 109.00 | 67.00 |
| 74 | 是 | 是 | 是 | 女 | 152.00 | 71.00 | 154.00 | 75.00 |
| 77 | 是 | 是 | 是 | 女 | 155.00 | 97.00 | 156.00 | 92.00 |
| 76 | 否 | 否 | 是 | 女 | 100.00 | 75.00 | 116.00 | 84.00 |
| 70 | 是 | 否 | 是 | 女 | 148.00 | 89.00 | 144.00 | 88.00 |
| 70 | 是 | 否 | 是 | 女 | 140.00 | 85.00 | 135.00 | 80.00 |
| 80 | 是 | 否 | 是 | 女 | 159.00 | 81.00 | 166.00 | 72.00 |
| 76 | 是 | 否 | 是 | 女 | 115.00 | 67.00 | 110.00 | 74.00 |
| 70 | 是 | 否 | 是 | 女 | 129.00 | 84.00 | 128.00 | 76.00 |
| 67 | 否 | 否 | 是 | 女 | 144.00 | 82.00 | 141.00 | 79.00 |
| 82 | 是 | 是 | 是 | 女 | 155.00 | 98.00 | 144.00 | 94.00 |
| 67 | 否 | 否 | 是 | 女 | 96.00  | 70.00 | 94.00  | 72.00 |
| 77 | 是 | 否 | 是 | 女 | 132.00 | 78.00 | 134.00 | 80.00 |
| 92 | 是 | 否 | 是 | 女 | 116.00 | 60.00 | 118.00 | 60.00 |
| 66 | 否 | 否 | 是 | 女 | 125.00 | 73.00 | 128.00 | 70.00 |
| 89 | 是 | 否 | 是 | 女 | 135.00 | 60.00 | 132.00 | 60.00 |
| 72 | 否 | 否 | 是 | 女 | 128.00 | 76.00 | 130.00 | 78.00 |
| 66 | 否 | 否 | 否 | 女 | 110.00 | 68.00 | 105.00 | 67.00 |
| 67 | 否 | 否 | 是 | 女 | 120.00 | 70.00 | 122.00 | 72.00 |
| 67 | 否 | 否 | 是 | 女 | 118.00 | 76.00 | 122.00 | 80.00 |
| 96 | 是 | 否 | 是 | 女 | 197.00 | 78.00 | 178.00 | 80.00 |
| 67 | 是 | 否 | 是 | 女 | 130.00 | 68.00 | 136.00 | 70.00 |
| 70 | 否 | 否 | 是 | 女 | 122.00 | 80.00 | 120.00 | 80.00 |
| 69 | 是 | 否 | 是 | 女 | 124.00 | 89.00 | 138.00 | 92.00 |
| 76 | 是 | 否 | 是 | 女 | 112.00 | 78.00 | 120.00 | 80.00 |
| 73 | 否 | 否 | 是 | 女 | 122.00 | 70.00 | 120.00 | 80.00 |
| 70 | 否 | 否 | 是 | 女 | 120.00 | 78.00 | 124.00 | 80.00 |
| 73 | 是 | 是 | 是 | 女 | 145.00 | 80.00 | 140.00 | 80.00 |
| 78 | 是 | 否 | 是 | 女 | 145.00 | 70.00 | 140.00 | 70.00 |
| 74 | 否 | 是 | 是 | 女 | 114.00 | 70.00 | 110.00 | 70.00 |
| 71 | 否 | 否 | 是 | 女 | 120.00 | 70.00 | 130.00 | 80.00 |
| 78 | 否 | 否 | 是 | 女 | 109.00 | 62.00 | 124.00 | 67.00 |
| 68 | 是 | 否 | 是 | 女 | 122.00 | 67.00 | 122.00 | 69.00 |
| 70 | 否 | 否 | 是 | 女 | 166.00 | 80.00 | 168.00 | 80.00 |
| 66 | 否 | 否 | 是 | 女 | 134.00 | 88.00 | 126.00 | 85.00 |
| 83 | 是 | 否 | 是 | 女 | 120.00 | 62.00 | 122.00 | 68.00 |
| 70 | 是 | 否 | 是 | 女 | 154.00 | 80.00 | 150.00 | 80.00 |
| 75 | 是 | 否 | 是 | 女 | 130.00 | 75.00 | 130.00 | 77.00 |

|    |   |   |   |   |        |       |        |       |
|----|---|---|---|---|--------|-------|--------|-------|
| 94 | 是 | 否 | 是 | 女 | 130.00 | 70.00 | 130.00 | 68.00 |
| 77 | 是 | 是 | 是 | 女 | 130.00 | 80.00 | 133.00 | 81.00 |
| 67 | 是 | 是 | 是 | 女 | 128.00 | 79.00 | 125.00 | 75.00 |
| 70 | 是 | 是 | 是 | 女 | 164.00 | 80.00 | 156.00 | 70.00 |
| 78 | 否 | 否 | 是 | 女 | 160.00 | 80.00 | 160.00 | 80.00 |
| 72 | 是 | 否 | 是 | 女 | 118.00 | 60.00 | 120.00 | 60.00 |
| 78 | 是 | 否 | 是 | 女 | 145.00 | 77.00 | 148.00 | 80.00 |
| 76 | 否 | 否 | 是 | 女 | 115.00 | 78.00 | 120.00 | 70.00 |
| 66 | 否 | 否 | 是 | 女 | 130.00 | 69.00 | 124.00 | 74.00 |
| 66 | 是 | 是 | 是 | 女 | 139.00 | 72.00 | 130.00 | 67.00 |
| 72 | 否 | 否 | 是 | 女 | 158.00 | 95.00 | 160.00 | 98.00 |
| 73 | 否 | 是 | 是 | 女 | 145.00 | 60.00 | 140.00 | 60.00 |
| 81 | 是 | 否 | 是 | 女 | 130.00 | 75.00 | 140.00 | 80.00 |
| 66 | 是 | 否 | 是 | 女 | 142.00 | 94.00 | 150.00 | 96.00 |
| 74 | 是 | 否 | 是 | 女 | 135.00 | 78.00 | 130.00 | 75.00 |
| 67 | 否 | 是 | 是 | 女 | 152.00 | 90.00 | 150.00 | 84.00 |
| 68 | 否 | 否 | 是 | 女 | 136.00 | 82.00 | 138.00 | 84.00 |
| 67 | 是 | 是 | 是 | 女 | 140.00 | 76.00 | 148.00 | 80.00 |
| 85 | 是 | 否 | 是 | 女 | 140.00 | 80.00 | 142.00 | 80.00 |
| 66 | 否 | 否 | 是 | 女 | 110.00 | 75.00 | 107.00 | 77.00 |
| 69 | 是 | 否 | 是 | 女 | 124.00 | 64.00 | 125.00 | 72.00 |
| 67 | 是 | 否 | 是 | 女 | 128.00 | 80.00 | 130.00 | 80.00 |
| 69 | 否 | 否 | 是 | 女 | 105.00 | 65.00 | 110.00 | 70.00 |
| 69 | 是 | 否 | 是 | 女 | 138.00 | 84.00 | 138.00 | 90.00 |
| 85 | 否 | 否 | 是 | 女 | 131.00 | 87.00 | 126.00 | 82.00 |
| 67 | 是 | 否 | 是 | 女 | 125.00 | 84.00 | 121.00 | 79.00 |
| 76 | 是 | 否 | 是 | 女 | 152.00 | 78.00 | 158.00 | 80.00 |
| 66 | 是 | 否 | 是 | 女 | 128.00 | 80.00 | 130.00 | 80.00 |
| 67 | 否 | 否 | 是 | 女 | 139.00 | 70.00 | 138.00 | 68.00 |
| 81 | 是 | 否 | 是 | 女 | 140.00 | 82.00 | 144.00 | 86.00 |
| 67 | 是 | 否 | 是 | 女 | 145.00 | 90.00 | 151.00 | 96.00 |
| 99 | 否 | 否 | 是 | 女 | 95.00  | 60.00 | 93.00  | 60.00 |
| 71 | 否 | 否 | 是 | 女 | 130.00 | 70.00 | 132.00 | 72.00 |
| 73 | 是 | 否 | 是 | 女 | 106.00 | 77.00 | 110.00 | 76.00 |
| 82 | 是 | 否 | 是 | 女 | 140.00 | 76.00 | 142.00 | 80.00 |
| 69 | 否 | 否 | 是 | 女 | 142.00 | 86.00 | 156.00 | 98.00 |
| 73 | 是 | 否 | 是 | 女 | 120.00 | 72.00 | 116.00 | 74.00 |
| 79 | 是 | 是 | 是 | 女 | 148.00 | 72.00 | 152.00 | 67.00 |
| 72 | 是 | 否 | 是 | 女 | 116.00 | 70.00 | 120.00 | 74.00 |
| 74 | 否 | 否 | 是 | 女 | 150.00 | 86.00 | 144.00 | 84.00 |
| 83 | 否 | 否 | 是 | 女 | 136.00 | 68.00 | 138.00 | 70.00 |
| 77 | 是 | 否 | 是 | 女 | 143.00 | 81.00 | 144.00 | 82.00 |
| 67 | 是 | 否 | 是 | 女 | 159.00 | 81.00 | 160.00 | 83.00 |
| 77 | 否 | 否 | 是 | 女 | 111.00 | 68.00 | 110.00 | 70.00 |
| 66 | 是 | 否 | 是 | 女 | 108.00 | 65.00 | 110.00 | 70.00 |
| 80 | 否 | 是 | 是 | 女 | 161.00 | 89.00 | 145.00 | 81.00 |
| 71 | 是 | 否 | 是 | 女 | 138.00 | 72.00 | 135.00 | 70.00 |
| 77 | 否 | 否 | 是 | 女 | 138.00 | 71.00 | 154.00 | 87.00 |
| 68 | 是 | 否 | 是 | 女 | 132.00 | 80.00 | 136.00 | 80.00 |
| 73 | 否 | 否 | 是 | 女 | 130.00 | 70.00 | 128.00 | 78.00 |
| 68 | 是 | 否 | 是 | 女 | 121.00 | 76.00 | 120.00 | 70.00 |

|    |   |   |   |   |        |        |        |        |
|----|---|---|---|---|--------|--------|--------|--------|
| 75 | 否 | 否 | 是 | 女 | 127.00 | 86.00  | 128.00 | 77.00  |
| 67 | 否 | 否 | 是 | 女 | 139.00 | 80.00  | 140.00 | 88.00  |
| 88 | 否 | 否 | 是 | 女 | 166.00 | 89.00  | 168.00 | 89.00  |
| 73 | 否 | 否 | 是 | 女 | 130.00 | 70.00  | 135.00 | 80.00  |
| 67 | 否 | 是 | 是 | 女 | 134.00 | 80.00  | 135.00 | 83.00  |
| 67 | 是 | 是 | 是 | 女 | 130.00 | 84.00  | 135.00 | 89.00  |
| 72 | 是 | 否 | 是 | 女 | 140.00 | 82.00  | 142.00 | 80.00  |
| 71 | 是 | 否 | 是 | 女 | 130.00 | 80.00  | 132.00 | 82.00  |
| 68 | 否 | 否 | 是 | 女 | 123.00 | 71.00  | 134.00 | 73.00  |
| 85 | 否 | 否 | 是 | 女 | 137.00 | 78.00  | 138.00 | 80.00  |
| 90 | 是 | 否 | 是 | 女 | 141.00 | 78.00  | 159.00 | 73.00  |
| 74 | 是 | 否 | 是 | 女 | 110.00 | 74.00  | 120.00 | 82.00  |
| 76 | 否 | 否 | 是 | 女 | 158.00 | 94.00  | 156.00 | 96.00  |
| 74 | 是 | 否 | 是 | 女 | 130.00 | 70.00  | 135.00 | 74.00  |
| 81 | 否 | 否 | 是 | 女 | 134.00 | 84.00  | 133.00 | 86.00  |
| 68 | 否 | 否 | 是 | 女 | 130.00 | 92.00  | 134.00 | 94.00  |
| 67 | 是 | 否 | 是 | 女 | 132.00 | 78.00  | 138.00 | 80.00  |
| 74 | 否 | 否 | 是 | 女 | 137.00 | 85.00  | 139.00 | 89.00  |
| 68 | 否 | 否 | 是 | 女 | 137.00 | 90.00  | 150.00 | 85.00  |
| 75 | 否 | 否 | 是 | 女 | 128.00 | 72.00  | 134.00 | 68.00  |
| 77 | 否 | 否 | 是 | 女 | 122.00 | 68.00  | 124.00 | 70.00  |
| 78 | 是 | 否 | 是 | 女 | 130.00 | 70.00  | 133.00 | 80.00  |
| 69 | 否 | 否 | 是 | 女 | 158.00 | 102.00 | 163.00 | 100.00 |
| 70 | 否 | 是 | 是 | 女 | 118.00 | 80.00  | 131.00 | 84.00  |
| 77 | 是 | 是 | 是 | 女 | 163.00 | 97.00  | 155.00 | 87.00  |
| 67 | 否 | 否 | 是 | 女 | 150.00 | 80.00  | 154.00 | 80.00  |
| 70 | 否 | 否 | 是 | 女 | 129.00 | 85.00  | 132.00 | 78.00  |
| 84 | 否 | 否 | 是 | 女 | 141.00 | 84.00  | 132.00 | 80.00  |
| 68 | 否 | 否 | 是 | 女 | 135.00 | 70.00  | 130.00 | 74.00  |
| 70 | 否 | 否 | 是 | 女 | 140.00 | 84.00  | 142.00 | 78.00  |
| 82 | 否 | 是 | 是 | 女 | 135.00 | 71.00  | 138.00 | 85.00  |
| 81 | 是 | 否 | 是 | 女 | 134.00 | 68.00  | 138.00 | 64.00  |
| 70 | 否 | 否 | 是 | 女 | 142.00 | 88.00  | 139.00 | 85.00  |
| 67 | 是 | 否 | 是 | 女 | 146.00 | 88.00  | 150.00 | 92.00  |
| 74 | 否 | 否 | 是 | 女 | 160.00 | 90.00  | 150.00 | 80.00  |
| 77 | 否 | 否 | 是 | 女 | 134.00 | 75.00  | 139.00 | 80.00  |
| 68 | 否 | 否 | 是 | 女 | 160.00 | 90.00  | 190.00 | 90.00  |
| 79 | 否 | 是 | 是 | 女 | 130.00 | 61.00  | 132.00 | 64.00  |
| 75 | 否 | 否 | 是 | 女 | 130.00 | 80.00  | 123.00 | 70.00  |
| 73 | 是 | 否 | 是 | 女 | 140.00 | 76.00  | 144.00 | 78.00  |
| 84 | 否 | 否 | 是 | 女 | 170.00 | 70.00  | 172.00 | 70.00  |
| 69 | 是 | 否 | 是 | 女 | 138.00 | 78.00  | 135.00 | 88.00  |
| 71 | 是 | 否 | 是 | 女 | 112.00 | 70.00  | 120.00 | 81.00  |
| 67 | 否 | 否 | 是 | 女 | 122.00 | 70.00  | 110.00 | 65.00  |
| 67 | 否 | 否 | 是 | 女 | 115.00 | 60.00  | 121.00 | 72.00  |
| 70 | 是 | 是 | 是 | 女 | 120.00 | 80.00  | 128.00 | 82.00  |
| 88 | 否 | 否 | 是 | 女 | 118.00 | 60.00  | 120.00 | 60.00  |
| 77 | 否 | 否 | 是 | 女 | 140.00 | 60.00  | 148.00 | 60.00  |
| 66 | 否 | 否 | 是 | 女 | 126.00 | 89.00  | 120.00 | 80.00  |
| 73 | 是 | 是 | 是 | 女 | 154.00 | 76.00  | 150.00 | 70.00  |
| 68 | 否 | 否 | 是 | 女 | 114.00 | 68.00  | 126.00 | 80.00  |

|    |   |   |   |   |        |        |        |        |
|----|---|---|---|---|--------|--------|--------|--------|
| 68 | 是 | 否 | 是 | 女 | 136.00 | 88.00  | 140.00 | 80.00  |
| 66 | 否 | 否 | 是 | 女 | 140.00 | 80.00  | 136.00 | 78.00  |
| 81 | 否 | 否 | 是 | 女 | 120.00 | 58.00  | 122.00 | 60.00  |
| 88 | 否 | 否 | 是 | 女 | 123.00 | 69.00  | 125.00 | 70.00  |
| 78 | 否 | 否 | 是 | 女 | 118.00 | 70.00  | 120.00 | 72.00  |
| 71 | 否 | 否 | 是 | 女 | 147.00 | 75.00  | 148.00 | 70.00  |
| 68 | 否 | 否 | 是 | 女 | 150.00 | 80.00  | 166.00 | 76.00  |
| 69 | 是 | 否 | 是 | 女 | 129.00 | 80.00  | 134.00 | 84.00  |
| 67 | 是 | 是 | 是 | 女 | 130.00 | 76.00  | 132.00 | 79.00  |
| 73 | 否 | 否 | 是 | 女 | 109.00 | 65.00  | 110.00 | 70.00  |
| 79 | 是 | 否 | 是 | 女 | 132.00 | 76.00  | 134.00 | 80.00  |
| 71 | 否 | 否 | 是 | 女 | 120.00 | 80.00  | 124.00 | 82.00  |
| 71 | 否 | 否 | 是 | 女 | 130.00 | 80.00  | 138.00 | 86.00  |
| 70 | 是 | 否 | 是 | 女 | 125.00 | 74.00  | 130.00 | 78.00  |
| 84 | 是 | 否 | 是 | 女 | 146.00 | 82.00  | 150.00 | 80.00  |
| 67 | 否 | 否 | 是 | 女 | 119.00 | 70.00  | 118.00 | 82.00  |
| 70 | 是 | 否 | 是 | 女 | 110.00 | 80.00  | 112.00 | 81.00  |
| 75 | 是 | 是 | 是 | 女 | 130.00 | 80.00  | 134.00 | 84.00  |
| 78 | 是 | 是 | 是 | 女 | 148.00 | 86.00  | 150.00 | 80.00  |
| 70 | 否 | 是 | 是 | 女 | 177.00 | 101.00 | 152.00 | 95.00  |
| 95 | 是 | 是 | 是 | 女 | 128.00 | 80.00  | 130.00 | 82.00  |
| 67 | 否 | 否 | 是 | 女 | 140.00 | 91.00  | 139.00 | 89.00  |
| 90 | 是 | 否 | 是 | 女 | 142.00 | 75.00  | 145.00 | 76.00  |
| 69 | 是 | 否 | 是 | 女 | 140.00 | 80.00  | 154.00 | 79.00  |
| 71 | 是 | 否 | 是 | 女 | 130.00 | 80.00  | 120.00 | 80.00  |
| 84 | 否 | 否 | 是 | 女 | 118.00 | 66.00  | 119.00 | 71.00  |
| 68 | 是 | 否 | 是 | 女 | 122.00 | 70.00  | 120.00 | 70.00  |
| 67 | 是 | 是 | 是 | 女 | 147.00 | 70.00  | 144.00 | 72.00  |
| 68 | 否 | 否 | 是 | 女 | 125.00 | 75.00  | 130.00 | 80.00  |
| 71 | 否 | 否 | 是 | 女 | 127.00 | 85.00  | 130.00 | 90.00  |
| 68 | 是 | 否 | 是 | 女 | 138.00 | 82.00  | 140.00 | 85.00  |
| 68 | 否 | 否 | 是 | 女 | 136.00 | 76.00  | 138.00 | 78.00  |
| 67 | 是 | 否 | 是 | 女 | 150.00 | 100.00 | 153.00 | 100.00 |
| 72 | 是 | 否 | 是 | 女 | 147.00 | 68.00  | 141.00 | 70.00  |
| 77 | 是 | 否 | 是 | 女 | 120.00 | 70.00  | 120.00 | 80.00  |
| 68 | 是 | 否 | 是 | 女 | 128.00 | 70.00  | 133.00 | 72.00  |
| 74 | 是 | 是 | 是 | 女 | 138.00 | 78.00  | 140.00 | 80.00  |
| 71 | 是 | 是 | 是 | 女 | 120.00 | 68.00  | 125.00 | 70.00  |
| 70 | 是 | 否 | 是 | 女 | 154.00 | 80.00  | 152.00 | 80.00  |
| 75 | 是 | 否 | 是 | 女 | 177.00 | 76.00  | 181.00 | 132.00 |
| 66 | 是 | 否 | 是 | 女 | 140.00 | 87.00  | 138.00 | 80.00  |
| 81 | 是 | 否 | 是 | 女 | 119.00 | 74.00  | 116.00 | 70.00  |
| 71 | 否 | 否 | 是 | 女 | 128.00 | 78.00  | 132.00 | 76.00  |
| 74 | 是 | 否 | 是 | 女 | 152.00 | 74.00  | 150.00 | 72.00  |
| 75 | 是 | 否 | 是 | 女 | 136.00 | 87.00  | 144.00 | 88.00  |
| 71 | 是 | 否 | 是 | 女 | 146.00 | 93.00  | 144.00 | 88.00  |
| 73 | 否 | 是 | 是 | 女 | 135.00 | 70.00  | 148.00 | 75.00  |
| 75 | 否 | 否 | 是 | 女 | 138.00 | 62.00  | 142.00 | 70.00  |
| 74 | 否 | 否 | 是 | 女 | 126.00 | 74.00  | 127.00 | 77.00  |
| 76 | 否 | 否 | 是 | 女 | 135.00 | 83.00  | 138.00 | 86.00  |
| 90 | 否 | 否 | 是 | 女 | 140.00 | 80.00  | 148.00 | 86.00  |

|    |   |   |   |   |        |        |        |       |
|----|---|---|---|---|--------|--------|--------|-------|
| 71 | 否 | 否 | 是 | 女 | 150.00 | 100.00 | 160.00 | 99.00 |
| 73 | 是 | 否 | 是 | 女 | 125.00 | 82.00  | 127.00 | 83.00 |
| 69 | 是 | 否 | 是 | 女 | 151.00 | 78.00  | 148.00 | 80.00 |
| 75 | 否 | 否 | 是 | 女 | 115.00 | 67.00  | 119.00 | 72.00 |
| 76 | 是 | 是 | 是 | 女 | 150.00 | 70.00  | 157.00 | 66.00 |
| 70 | 否 | 否 | 是 | 女 | 136.00 | 70.00  | 138.00 | 70.00 |
| 71 | 否 | 否 | 是 | 女 | 160.00 | 88.00  | 165.00 | 88.00 |
| 67 | 否 | 否 | 是 | 女 | 120.00 | 78.00  | 122.00 | 80.00 |
| 81 | 是 | 否 | 是 | 女 | 143.00 | 85.00  | 137.00 | 81.00 |
| 78 | 否 | 否 | 是 | 女 | 126.00 | 80.00  | 130.00 | 85.00 |
| 68 | 是 | 否 | 是 | 女 | 128.00 | 68.00  | 130.00 | 70.00 |
| 73 | 是 | 否 | 是 | 女 | 163.00 | 79.00  | 145.00 | 85.00 |
| 88 | 否 | 否 | 是 | 女 | 115.00 | 72.00  | 110.00 | 78.00 |
| 67 | 否 | 否 | 是 | 女 | 130.00 | 88.00  | 140.00 | 90.00 |
| 67 | 是 | 否 | 是 | 女 | 150.00 | 96.00  | 146.00 | 90.00 |
| 67 | 否 | 否 | 是 | 女 | 110.00 | 70.00  | 112.00 | 72.00 |
| 67 | 是 | 否 | 是 | 女 | 130.00 | 80.00  | 133.00 | 85.00 |
| 71 | 是 | 是 | 是 | 女 | 158.00 | 78.00  | 160.00 | 80.00 |
| 73 | 是 | 否 | 是 | 女 | 130.00 | 70.00  | 136.00 | 83.00 |
| 77 | 是 | 是 | 是 | 女 | 120.00 | 75.00  | 122.00 | 73.00 |
| 75 | 否 | 否 | 是 | 女 | 135.00 | 74.00  | 130.00 | 72.00 |
| 71 | 否 | 否 | 是 | 女 | 130.00 | 80.00  | 123.00 | 72.00 |
| 66 | 否 | 否 | 是 | 女 | 102.00 | 70.00  | 106.00 | 73.00 |
| 78 | 否 | 否 | 是 | 女 | 156.00 | 86.00  | 160.00 | 90.00 |
| 75 | 是 | 否 | 是 | 女 | 146.00 | 88.00  | 166.00 | 94.00 |
| 85 | 是 | 否 | 是 | 女 | 149.00 | 82.00  | 148.00 | 80.00 |
| 71 | 否 | 否 | 是 | 女 | 138.00 | 78.00  | 136.00 | 80.00 |
| 74 | 是 | 是 | 是 | 女 | 150.00 | 72.00  | 154.00 | 78.00 |
| 81 | 是 | 否 | 是 | 女 | 152.00 | 75.00  | 170.00 | 82.00 |
| 84 | 是 | 否 | 是 | 女 | 120.00 | 78.00  | 130.00 | 76.00 |
| 74 | 是 | 否 | 是 | 女 | 129.00 | 78.00  | 130.00 | 80.00 |
| 70 | 否 | 否 | 是 | 女 | 134.00 | 70.00  | 140.00 | 75.00 |
| 77 | 是 | 否 | 是 | 女 | 128.00 | 76.00  | 130.00 | 78.00 |
| 77 | 是 | 否 | 是 | 女 | 136.00 | 67.00  | 138.00 | 70.00 |
| 67 | 是 | 否 | 是 | 女 | 145.00 | 87.00  | 148.00 | 89.00 |
| 72 | 是 | 否 | 是 | 女 | 136.00 | 76.00  | 142.00 | 80.00 |
| 73 | 否 | 否 | 是 | 女 | 136.00 | 78.00  | 138.00 | 80.00 |
| 84 | 是 | 否 | 是 | 女 | 148.00 | 82.00  | 145.00 | 78.00 |
| 71 | 是 | 否 | 是 | 女 | 138.00 | 80.00  | 130.00 | 80.00 |
| 66 | 是 | 否 | 是 | 女 | 120.00 | 70.00  | 118.00 | 66.00 |
| 66 | 是 | 否 | 是 | 女 | 154.00 | 84.00  | 142.00 | 76.00 |
| 69 | 否 | 否 | 是 | 女 | 120.00 | 86.00  | 122.00 | 85.00 |
| 74 | 是 | 是 | 是 | 女 | 147.00 | 82.00  | 145.00 | 80.00 |
| 66 | 是 | 是 | 是 | 女 | 135.00 | 75.00  | 138.00 | 80.00 |
| 76 | 是 | 是 | 是 | 女 | 128.00 | 76.00  | 130.00 | 79.00 |
| 73 | 是 | 否 | 是 | 女 | 120.00 | 70.00  | 126.00 | 79.00 |
| 87 | 是 | 否 | 是 | 女 | 105.00 | 62.00  | 112.00 | 69.00 |
| 73 | 否 | 否 | 是 | 女 | 110.00 | 60.00  | 115.00 | 65.00 |
| 78 | 是 | 否 | 是 | 女 | 140.00 | 80.00  | 148.00 | 86.00 |
| 69 | 是 | 否 | 是 | 女 | 150.00 | 90.00  | 155.00 | 92.00 |
| 84 | 是 | 是 | 是 | 女 | 126.00 | 70.00  | 132.00 | 74.00 |

|    |   |   |   |   |        |       |        |        |
|----|---|---|---|---|--------|-------|--------|--------|
| 82 | 是 | 是 | 是 | 女 | 117.00 | 67.00 | 120.00 | 70.00  |
| 78 | 否 | 否 | 是 | 女 | 170.00 | 80.00 | 170.00 | 85.00  |
| 81 | 是 | 是 | 是 | 女 | 128.00 | 70.00 | 130.00 | 70.00  |
| 69 | 是 | 否 | 是 | 女 | 150.00 | 70.00 | 152.00 | 68.00  |
| 68 | 是 | 否 | 是 | 女 | 145.00 | 90.00 | 140.00 | 90.00  |
| 70 | 否 | 否 | 是 | 女 | 130.00 | 78.00 | 128.00 | 76.00  |
| 72 | 是 | 否 | 是 | 女 | 130.00 | 70.00 | 138.00 | 76.00  |
| 66 | 否 | 否 | 否 | 女 | 114.00 | 77.00 | 115.00 | 77.00  |
| 68 | 是 | 是 | 是 | 女 | 118.00 | 70.00 | 120.00 | 80.00  |
| 66 | 否 | 否 | 是 | 女 | 145.00 | 93.00 | 164.00 | 93.00  |
| 66 | 是 | 否 | 是 | 女 | 139.00 | 90.00 | 143.00 | 93.00  |
| 67 | 否 | 否 | 是 | 女 | 130.00 | 82.00 | 132.00 | 86.00  |
| 67 | 否 | 否 | 是 | 女 | 120.00 | 75.00 | 125.00 | 80.00  |
| 68 | 是 | 否 | 是 | 女 | 150.00 | 90.00 | 148.00 | 90.00  |
| 79 | 是 | 否 | 是 | 女 | 124.00 | 76.00 | 126.00 | 78.00  |
| 82 | 是 | 是 | 是 | 女 | 133.00 | 85.00 | 129.00 | 74.00  |
| 74 | 是 | 否 | 是 | 女 | 108.00 | 68.00 | 110.00 | 70.00  |
| 69 | 是 | 否 | 是 | 女 | 119.00 | 69.00 | 122.00 | 82.00  |
| 86 | 否 | 否 | 是 | 女 | 132.00 | 72.00 | 136.00 | 75.00  |
| 76 | 否 | 否 | 是 | 女 | 127.00 | 78.00 | 120.00 | 80.00  |
| 74 | 是 | 否 | 是 | 女 | 140.00 | 80.00 | 150.00 | 81.00  |
| 94 | 是 | 否 | 是 | 女 | 145.00 | 78.00 | 154.00 | 79.00  |
| 72 | 是 | 否 | 是 | 女 | 134.00 | 89.00 | 136.00 | 90.00  |
| 73 | 是 | 否 | 是 | 女 | 121.00 | 77.00 | 118.00 | 74.00  |
| 66 | 是 | 否 | 是 | 女 | 140.00 | 78.00 | 142.00 | 85.00  |
| 78 | 否 | 否 | 是 | 女 | 138.00 | 68.00 | 135.00 | 63.00  |
| 77 | 是 | 否 | 是 | 女 | 138.00 | 75.00 | 147.00 | 79.00  |
| 80 | 是 | 否 | 是 | 女 | 128.00 | 72.00 | 130.00 | 70.00  |
| 92 | 否 | 否 | 是 | 女 | 96.00  | 60.00 | 110.00 | 60.00  |
| 96 | 是 | 否 | 是 | 女 | 144.00 | 60.00 | 140.00 | 60.00  |
| 73 | 否 | 否 | 是 | 女 | 116.00 | 71.00 | 120.00 | 80.00  |
| 67 | 否 | 否 | 是 | 女 | 178.00 | 97.00 | 180.00 | 100.00 |
| 76 | 是 | 是 | 是 | 女 | 152.00 | 78.00 | 158.00 | 80.00  |
| 70 | 否 | 否 | 是 | 女 | 139.00 | 78.00 | 139.00 | 82.00  |
| 75 | 否 | 否 | 是 | 女 | 136.00 | 80.00 | 130.00 | 80.00  |
| 70 | 是 | 是 | 是 | 女 | 125.00 | 60.00 | 120.00 | 60.00  |
| 67 | 否 | 否 | 是 | 女 | 124.00 | 67.00 | 126.00 | 69.00  |
| 74 | 是 | 是 | 是 | 女 | 142.00 | 81.00 | 140.00 | 80.00  |
| 78 | 是 | 否 | 是 | 女 | 156.00 | 87.00 | 163.00 | 85.00  |
| 73 | 否 | 是 | 是 | 女 | 98.00  | 60.00 | 100.00 | 61.00  |
| 77 | 是 | 否 | 是 | 女 | 159.00 | 94.00 | 160.00 | 97.00  |
| 75 | 否 | 否 | 是 | 女 | 145.00 | 65.00 | 150.00 | 70.00  |
| 83 | 是 | 是 | 是 | 女 | 153.00 | 76.00 | 154.00 | 72.00  |
| 76 | 是 | 是 | 是 | 女 | 138.00 | 79.00 | 139.00 | 80.00  |
| 66 | 否 | 否 | 是 | 女 | 126.00 | 70.00 | 124.00 | 70.00  |
| 71 | 是 | 否 | 是 | 女 | 110.00 | 62.00 | 114.00 | 60.00  |
| 72 | 是 | 否 | 是 | 女 | 152.00 | 82.00 | 156.00 | 84.00  |
| 70 | 否 | 否 | 是 | 女 | 108.00 | 62.00 | 100.00 | 70.00  |
| 83 | 是 | 否 | 是 | 女 | 140.00 | 80.00 | 145.00 | 82.00  |
| 73 | 否 | 否 | 是 | 女 | 110.00 | 70.00 | 105.00 | 74.00  |
| 68 | 否 | 否 | 是 | 女 | 138.00 | 70.00 | 136.00 | 70.00  |

|    |   |   |   |   |        |        |        |        |
|----|---|---|---|---|--------|--------|--------|--------|
| 68 | 是 | 否 | 是 | 女 | 141.00 | 89.00  | 140.00 | 90.00  |
| 66 | 是 | 否 | 是 | 女 | 135.00 | 85.00  | 130.00 | 80.00  |
| 68 | 否 | 否 | 是 | 女 | 140.00 | 80.00  | 140.00 | 85.00  |
| 72 | 否 | 否 | 是 | 女 | 128.00 | 69.00  | 130.00 | 70.00  |
| 79 | 是 | 否 | 是 | 女 | 119.00 | 75.00  | 127.00 | 87.00  |
| 75 | 否 | 否 | 是 | 女 | 130.00 | 60.00  | 125.00 | 60.00  |
| 68 | 否 | 否 | 是 | 女 | 120.00 | 80.00  | 117.00 | 74.00  |
| 72 | 是 | 否 | 是 | 女 | 168.00 | 100.00 | 170.00 | 110.00 |
| 77 | 是 | 否 | 是 | 女 | 135.00 | 80.00  | 138.00 | 85.00  |
| 66 | 是 | 是 | 是 | 女 | 115.00 | 70.00  | 117.00 | 72.00  |
| 75 | 否 | 否 | 是 | 女 | 130.00 | 70.00  | 128.00 | 68.00  |
| 75 | 是 | 否 | 是 | 女 | 157.00 | 82.00  | 166.00 | 79.00  |
| 71 | 是 | 是 | 是 | 女 | 120.00 | 64.00  | 124.00 | 70.00  |
| 73 | 是 | 否 | 是 | 女 | 110.00 | 72.00  | 110.00 | 75.00  |
| 81 | 否 | 否 | 是 | 女 | 135.00 | 80.00  | 130.00 | 80.00  |
| 71 | 否 | 否 | 是 | 女 | 162.00 | 98.00  | 165.00 | 98.00  |
| 70 | 是 | 否 | 是 | 女 | 130.00 | 80.00  | 132.00 | 82.00  |
| 68 | 否 | 否 | 是 | 女 | 121.00 | 58.00  | 115.00 | 63.00  |
| 73 | 是 | 否 | 是 | 女 | 152.00 | 80.00  | 138.00 | 80.00  |
| 76 | 是 | 否 | 是 | 女 | 135.00 | 85.00  | 138.00 | 85.00  |
| 74 | 是 | 否 | 是 | 女 | 139.00 | 89.00  | 135.00 | 80.00  |
| 76 | 是 | 否 | 是 | 女 | 128.00 | 62.00  | 130.00 | 64.00  |
| 80 | 是 | 否 | 是 | 女 | 150.00 | 90.00  | 151.00 | 85.00  |
| 73 | 否 | 否 | 是 | 女 | 139.00 | 80.00  | 136.00 | 76.00  |
| 67 | 否 | 否 | 是 | 女 | 148.00 | 90.00  | 150.00 | 92.00  |
| 77 | 是 | 否 | 是 | 女 | 122.00 | 80.00  | 124.00 | 88.00  |
| 75 | 否 | 否 | 是 | 女 | 125.00 | 73.00  | 127.00 | 76.00  |
| 75 | 是 | 否 | 是 | 女 | 114.00 | 80.00  | 137.00 | 82.00  |
| 74 | 是 | 否 | 是 | 女 | 139.00 | 84.00  | 136.00 | 85.00  |
| 82 | 否 | 是 | 是 | 女 | 130.00 | 80.00  | 135.00 | 86.00  |
| 75 | 否 | 否 | 是 | 女 | 112.00 | 62.00  | 116.00 | 66.00  |
| 66 | 否 | 否 | 是 | 女 | 130.00 | 74.00  | 128.00 | 72.00  |
| 76 | 是 | 是 | 是 | 女 | 149.00 | 69.00  | 149.00 | 65.00  |
| 74 | 是 | 否 | 是 | 女 | 139.00 | 68.00  | 148.00 | 71.00  |
| 70 | 否 | 否 | 是 | 女 | 146.00 | 80.00  | 147.00 | 89.00  |
| 72 | 是 | 否 | 是 | 女 | 129.00 | 76.00  | 133.00 | 79.00  |
| 73 | 否 | 是 | 是 | 女 | 160.00 | 105.00 | 155.00 | 103.00 |
| 66 | 否 | 否 | 是 | 女 | 112.00 | 70.00  | 115.00 | 79.00  |
| 67 | 是 | 否 | 是 | 女 | 134.00 | 82.00  | 123.00 | 80.00  |
| 72 | 否 | 否 | 是 | 女 | 128.00 | 77.00  | 145.00 | 86.00  |
| 67 | 是 | 否 | 是 | 女 | 130.00 | 80.00  | 130.00 | 84.00  |
| 66 | 否 | 否 | 是 | 女 | 136.00 | 76.00  | 124.00 | 68.00  |
| 70 | 是 | 是 | 是 | 女 | 146.00 | 74.00  | 148.00 | 82.00  |
| 79 | 否 | 否 | 是 | 女 | 130.00 | 80.00  | 120.00 | 80.00  |
| 71 | 是 | 否 | 是 | 女 | 133.00 | 87.00  | 140.00 | 89.00  |
| 80 | 是 | 否 | 是 | 女 | 140.00 | 82.00  | 145.00 | 77.00  |
| 66 | 否 | 否 | 否 | 女 | 110.00 | 70.00  | 112.00 | 72.00  |
| 74 | 否 | 否 | 是 | 女 | 180.00 | 95.00  | 180.00 | 100.00 |
| 71 | 否 | 否 | 是 | 女 | 152.00 | 76.00  | 157.00 | 77.00  |
| 76 | 是 | 否 | 是 | 女 | 145.00 | 70.00  | 140.00 | 70.00  |
| 66 | 否 | 否 | 是 | 女 | 126.00 | 86.00  | 122.00 | 84.00  |

|    |   |   |   |   |        |        |        |        |
|----|---|---|---|---|--------|--------|--------|--------|
| 69 | 否 | 否 | 是 | 女 | 117.00 | 75.00  | 125.00 | 71.00  |
| 72 | 否 | 是 | 是 | 女 | 130.00 | 90.00  | 132.00 | 92.00  |
| 72 | 否 | 否 | 是 | 女 | 132.00 | 78.00  | 138.00 | 80.00  |
| 66 | 是 | 是 | 是 | 女 | 106.00 | 65.00  | 110.00 | 70.00  |
| 97 | 是 | 否 | 是 | 女 | 132.00 | 61.00  | 135.00 | 65.00  |
| 69 | 是 | 否 | 是 | 女 | 140.00 | 70.00  | 130.00 | 68.00  |
| 71 | 否 | 否 | 是 | 女 | 96.00  | 60.00  | 98.00  | 60.00  |
| 72 | 是 | 是 | 是 | 女 | 127.00 | 78.00  | 139.00 | 80.00  |
| 72 | 是 | 否 | 是 | 女 | 134.00 | 76.00  | 136.00 | 78.00  |
| 87 | 否 | 否 | 是 | 女 | 137.00 | 67.00  | 130.00 | 67.00  |
| 77 | 是 | 否 | 是 | 女 | 125.00 | 71.00  | 129.00 | 76.00  |
| 67 | 是 | 是 | 是 | 女 | 144.00 | 85.00  | 143.00 | 81.00  |
| 79 | 否 | 否 | 是 | 女 | 124.00 | 76.00  | 136.00 | 79.00  |
| 71 | 否 | 否 | 是 | 女 | 120.00 | 75.00  | 124.00 | 75.00  |
| 82 | 是 | 是 | 是 | 女 | 120.00 | 76.00  | 124.00 | 70.00  |
| 75 | 否 | 否 | 是 | 女 | 152.00 | 93.00  | 150.00 | 89.00  |
| 72 | 是 | 是 | 是 | 女 | 150.00 | 80.00  | 154.00 | 90.00  |
| 67 | 是 | 否 | 是 | 女 | 130.00 | 80.00  | 135.00 | 82.00  |
| 75 | 否 | 否 | 是 | 女 | 120.00 | 70.00  | 116.00 | 75.00  |
| 71 | 是 | 是 | 是 | 女 | 130.00 | 84.00  | 132.00 | 82.00  |
| 76 | 否 | 否 | 是 | 女 | 122.00 | 62.00  | 128.00 | 64.00  |
| 75 | 否 | 否 | 是 | 女 | 128.00 | 70.00  | 139.00 | 78.00  |
| 70 | 否 | 否 | 是 | 女 | 94.00  | 62.00  | 96.00  | 66.00  |
| 70 | 是 | 否 | 是 | 女 | 140.00 | 70.00  | 135.00 | 70.00  |
| 73 | 否 | 否 | 是 | 女 | 120.00 | 80.00  | 130.00 | 70.00  |
| 67 | 否 | 是 | 是 | 女 | 110.00 | 60.00  | 114.00 | 62.00  |
| 69 | 是 | 否 | 是 | 女 | 220.00 | 116.00 | 244.00 | 120.00 |
| 73 | 否 | 否 | 是 | 女 | 140.00 | 90.00  | 140.00 | 80.00  |
| 68 | 是 | 是 | 是 | 女 | 130.00 | 70.00  | 136.00 | 73.00  |
| 67 | 否 | 否 | 是 | 女 | 110.00 | 70.00  | 100.00 | 60.00  |
| 74 | 是 | 是 | 是 | 女 | 120.00 | 70.00  | 110.00 | 70.00  |
| 66 | 否 | 否 | 是 | 女 | 162.00 | 94.00  | 166.00 | 96.00  |
| 88 | 否 | 否 | 是 | 女 | 130.00 | 65.00  | 128.00 | 65.00  |
| 70 | 否 | 否 | 是 | 女 | 110.00 | 70.00  | 120.00 | 60.00  |
| 70 | 否 | 是 | 是 | 女 | 138.00 | 68.00  | 140.00 | 70.00  |
| 73 | 否 | 是 | 是 | 女 | 112.00 | 77.00  | 124.00 | 84.00  |
| 66 | 否 | 否 | 是 | 女 | 109.00 | 77.00  | 112.00 | 80.00  |
| 69 | 是 | 否 | 是 | 女 | 149.00 | 83.00  | 147.00 | 93.00  |
| 77 | 是 | 否 | 是 | 女 | 150.00 | 80.00  | 158.00 | 92.00  |
| 76 | 是 | 否 | 是 | 女 | 140.00 | 75.00  | 142.00 | 81.00  |
| 76 | 是 | 是 | 是 | 女 | 155.00 | 90.00  | 160.00 | 94.00  |
| 77 | 否 | 否 | 是 | 女 | 120.00 | 70.00  | 120.00 | 76.00  |
| 76 | 是 | 是 | 是 | 女 | 118.00 | 70.00  | 120.00 | 72.00  |
| 69 | 否 | 否 | 是 | 女 | 95.00  | 60.00  | 94.00  | 54.00  |
| 76 | 否 | 否 | 是 | 女 | 136.00 | 72.00  | 138.00 | 70.00  |
| 68 | 否 | 否 | 是 | 女 | 120.00 | 70.00  | 115.00 | 70.00  |
| 67 | 否 | 否 | 是 | 女 | 124.00 | 70.00  | 124.00 | 84.00  |
| 68 | 是 | 是 | 是 | 女 | 146.00 | 80.00  | 148.00 | 84.00  |
| 70 | 否 | 否 | 是 | 女 | 120.00 | 80.00  | 115.00 | 80.00  |
| 72 | 是 | 否 | 是 | 女 | 138.00 | 70.00  | 140.00 | 78.00  |
| 76 | 是 | 否 | 是 | 女 | 138.00 | 78.00  | 139.00 | 80.00  |

|    |   |   |   |   |        |       |        |       |
|----|---|---|---|---|--------|-------|--------|-------|
| 66 | 否 | 否 | 是 | 女 | 126.00 | 74.00 | 124.00 | 74.00 |
| 74 | 是 | 否 | 是 | 女 | 145.00 | 98.00 | 155.00 | 91.00 |
| 75 | 是 | 是 | 是 | 女 | 121.00 | 89.00 | 128.00 | 82.00 |
| 67 | 是 | 否 | 是 | 女 | 130.00 | 78.00 | 130.00 | 80.00 |
| 84 | 否 | 否 | 是 | 女 | 110.00 | 70.00 | 120.00 | 82.00 |
| 71 | 是 | 否 | 是 | 女 | 114.00 | 70.00 | 120.00 | 76.00 |
| 74 | 否 | 否 | 是 | 女 | 108.00 | 68.00 | 110.00 | 70.00 |
| 73 | 是 | 否 | 是 | 女 | 115.00 | 84.00 | 120.00 | 88.00 |
| 67 | 是 | 是 | 是 | 女 | 130.00 | 70.00 | 134.00 | 79.00 |
| 76 | 是 | 否 | 是 | 女 | 202.00 | 96.00 | 193.00 | 93.00 |
| 83 | 是 | 否 | 是 | 女 | 150.00 | 70.00 | 152.00 | 72.00 |
| 69 | 是 | 是 | 是 | 女 | 110.00 | 70.00 | 115.00 | 70.00 |
| 66 | 是 | 否 | 是 | 女 | 140.00 | 94.00 | 154.00 | 98.00 |
| 78 | 是 | 否 | 是 | 女 | 116.00 | 78.00 | 120.00 | 80.00 |
| 70 | 是 | 否 | 是 | 女 | 120.00 | 70.00 | 128.00 | 76.00 |
| 68 | 是 | 否 | 是 | 女 | 138.00 | 78.00 | 134.00 | 76.00 |
| 70 | 否 | 否 | 是 | 女 | 118.00 | 70.00 | 120.00 | 78.00 |
| 66 | 是 | 否 | 是 | 女 | 125.00 | 72.00 | 130.00 | 80.00 |
| 71 | 是 | 否 | 是 | 女 | 150.00 | 80.00 | 158.00 | 86.00 |
| 83 | 是 | 否 | 是 | 女 | 146.00 | 76.00 | 144.00 | 73.00 |
| 66 | 是 | 否 | 否 | 女 | 130.00 | 86.00 | 133.00 | 89.00 |
| 75 | 是 | 否 | 是 | 女 | 158.00 | 82.00 | 164.00 | 80.00 |
| 68 | 是 | 否 | 是 | 女 | 131.00 | 80.00 | 135.00 | 83.00 |
| 73 | 否 | 否 | 是 | 女 | 138.00 | 80.00 | 140.00 | 80.00 |
| 66 | 否 | 否 | 是 | 女 | 130.00 | 80.00 | 137.00 | 81.00 |
| 69 | 否 | 否 | 是 | 女 | 125.00 | 65.00 | 130.00 | 70.00 |
| 69 | 是 | 否 | 是 | 女 | 132.00 | 82.00 | 130.00 | 86.00 |
| 66 | 是 | 否 | 是 | 女 | 130.00 | 80.00 | 147.00 | 94.00 |
| 70 | 否 | 否 | 是 | 女 | 115.00 | 75.00 | 120.00 | 80.00 |
| 87 | 是 | 否 | 是 | 女 | 120.00 | 74.00 | 130.00 | 76.00 |
| 75 | 是 | 否 | 是 | 女 | 115.00 | 62.00 | 118.00 | 61.00 |
| 69 | 否 | 否 | 是 | 女 | 118.00 | 78.00 | 120.00 | 74.00 |
| 68 | 是 | 否 | 是 | 女 | 120.00 | 72.00 | 118.00 | 70.00 |
| 76 | 是 | 否 | 是 | 女 | 128.00 | 68.00 | 130.00 | 70.00 |
| 70 | 是 | 否 | 是 | 女 | 160.00 | 80.00 | 160.00 | 70.00 |
| 74 | 否 | 是 | 是 | 女 | 149.00 | 81.00 | 156.00 | 90.00 |
| 66 | 是 | 否 | 是 | 女 | 141.00 | 88.00 | 138.00 | 86.00 |
| 70 | 是 | 是 | 是 | 女 | 130.00 | 82.00 | 138.00 | 86.00 |
| 66 | 否 | 否 | 是 | 女 | 120.00 | 60.00 | 115.00 | 60.00 |
| 73 | 否 | 否 | 是 | 女 | 120.00 | 80.00 | 110.00 | 76.00 |
| 72 | 否 | 否 | 是 | 女 | 130.00 | 66.00 | 139.00 | 71.00 |
| 67 | 否 | 否 | 是 | 女 | 130.00 | 69.00 | 131.00 | 70.00 |
| 94 | 否 | 否 | 是 | 女 | 136.00 | 88.00 | 134.00 | 82.00 |
| 71 | 是 | 否 | 是 | 女 | 133.00 | 71.00 | 134.00 | 70.00 |
| 79 | 是 | 是 | 是 | 女 | 130.00 | 82.00 | 140.00 | 90.00 |
| 70 | 是 | 否 | 是 | 女 | 126.00 | 78.00 | 124.00 | 80.00 |
| 67 | 否 | 否 | 是 | 女 | 145.00 | 90.00 | 147.00 | 89.00 |
| 67 | 否 | 否 | 是 | 女 | 130.00 | 81.00 | 126.00 | 76.00 |
| 72 | 是 | 是 | 是 | 女 | 160.00 | 90.00 | 162.00 | 92.00 |
| 68 | 否 | 否 | 是 | 女 | 120.00 | 70.00 | 130.00 | 68.00 |
| 87 | 否 | 否 | 是 | 女 | 116.00 | 70.00 | 120.00 | 70.00 |

|    |   |   |   |   |        |        |        |        |
|----|---|---|---|---|--------|--------|--------|--------|
| 76 | 否 | 否 | 是 | 女 | 140.00 | 80.00  | 135.00 | 76.00  |
| 73 | 否 | 是 | 是 | 女 | 106.00 | 74.00  | 119.00 | 72.00  |
| 67 | 是 | 是 | 是 | 女 | 126.00 | 80.00  | 128.00 | 80.00  |
| 70 | 否 | 否 | 是 | 女 | 120.00 | 60.00  | 114.00 | 67.00  |
| 73 | 是 | 否 | 是 | 女 | 128.00 | 78.00  | 131.00 | 86.00  |
| 73 | 否 | 否 | 是 | 女 | 138.00 | 76.00  | 140.00 | 80.00  |
| 68 | 是 | 否 | 是 | 女 | 130.00 | 70.00  | 130.00 | 80.00  |
| 71 | 否 | 否 | 是 | 女 | 137.00 | 82.00  | 132.00 | 76.00  |
| 77 | 是 | 是 | 是 | 女 | 162.00 | 84.00  | 163.00 | 81.00  |
| 66 | 是 | 否 | 是 | 女 | 136.00 | 78.00  | 138.00 | 80.00  |
| 66 | 是 | 是 | 否 | 女 | 210.00 | 90.00  | 220.00 | 110.00 |
| 67 | 是 | 否 | 是 | 女 | 130.00 | 86.00  | 128.00 | 70.00  |
| 69 | 否 | 否 | 是 | 女 | 125.00 | 80.00  | 120.00 | 75.00  |
| 75 | 是 | 否 | 是 | 女 | 140.00 | 80.00  | 145.00 | 86.00  |
| 82 | 是 | 否 | 是 | 女 | 128.00 | 78.00  | 130.00 | 80.00  |
| 68 | 是 | 否 | 是 | 女 | 140.00 | 76.00  | 140.00 | 79.00  |
| 68 | 否 | 否 | 是 | 女 | 125.00 | 99.00  | 120.00 | 90.00  |
| 70 | 是 | 是 | 是 | 女 | 130.00 | 80.00  | 132.00 | 79.00  |
| 67 | 否 | 是 | 是 | 女 | 110.00 | 68.00  | 118.00 | 78.00  |
| 68 | 是 | 否 | 是 | 女 | 142.00 | 100.00 | 150.00 | 100.00 |
| 68 | 否 | 否 | 是 | 女 | 115.00 | 72.00  | 118.00 | 76.00  |
| 76 | 是 | 是 | 是 | 女 | 105.00 | 65.00  | 110.00 | 70.00  |
| 70 | 否 | 否 | 是 | 女 | 117.00 | 70.00  | 110.00 | 68.00  |
| 66 | 是 | 是 | 是 | 女 | 120.00 | 78.00  | 130.00 | 86.00  |
| 76 | 是 | 是 | 是 | 女 | 132.00 | 62.00  | 139.00 | 65.00  |
| 70 | 否 | 否 | 是 | 女 | 108.00 | 73.00  | 110.00 | 80.00  |
| 71 | 是 | 否 | 是 | 女 | 130.00 | 70.00  | 135.00 | 80.00  |
| 71 | 否 | 否 | 是 | 女 | 128.00 | 76.00  | 129.00 | 79.00  |
| 78 | 是 | 否 | 是 | 女 | 80.00  | 40.00  | 82.00  | 46.00  |
| 69 | 是 | 否 | 是 | 女 | 128.00 | 78.00  | 130.00 | 80.00  |
| 76 | 否 | 是 | 是 | 女 | 120.00 | 80.00  | 125.00 | 75.00  |
| 68 | 是 | 否 | 是 | 女 | 130.00 | 80.00  | 129.00 | 78.00  |
| 67 | 是 | 是 | 是 | 女 | 116.00 | 75.00  | 117.00 | 76.00  |
| 76 | 是 | 是 | 是 | 女 | 155.00 | 80.00  | 160.00 | 85.00  |
| 72 | 是 | 否 | 是 | 女 | 145.00 | 82.00  | 158.00 | 88.00  |
| 86 | 否 | 否 | 是 | 女 | 125.00 | 80.00  | 131.00 | 70.00  |
| 82 | 否 | 否 | 是 | 女 | 106.00 | 66.00  | 110.00 | 70.00  |
| 67 | 否 | 否 | 是 | 女 | 120.00 | 80.00  | 117.00 | 80.00  |
| 69 | 否 | 否 | 是 | 女 | 118.00 | 84.00  | 120.00 | 87.00  |
| 70 | 否 | 否 | 是 | 女 | 135.00 | 80.00  | 149.00 | 89.00  |
| 71 | 是 | 否 | 是 | 女 | 135.00 | 78.00  | 136.00 | 79.00  |
| 77 | 是 | 是 | 是 | 女 | 135.00 | 74.00  | 139.00 | 77.00  |
| 76 | 否 | 否 | 是 | 女 | 134.00 | 78.00  | 136.00 | 70.00  |
| 66 | 是 | 否 | 是 | 女 | 110.00 | 70.00  | 112.00 | 72.00  |
| 67 | 否 | 否 | 是 | 女 | 138.00 | 90.00  | 135.00 | 89.00  |
| 72 | 否 | 否 | 是 | 女 | 116.00 | 68.00  | 120.00 | 70.00  |
| 69 | 否 | 否 | 是 | 女 | 138.00 | 86.00  | 146.00 | 89.00  |
| 69 | 否 | 否 | 是 | 女 | 102.00 | 69.00  | 124.00 | 80.00  |
| 81 | 是 | 否 | 是 | 女 | 120.00 | 70.00  | 125.00 | 78.00  |
| 76 | 是 | 是 | 是 | 女 | 160.00 | 78.00  | 158.00 | 80.00  |
| 66 | 是 | 是 | 是 | 女 | 148.00 | 83.00  | 145.00 | 80.00  |

|    |    |   |   |   |        |        |        |        |
|----|----|---|---|---|--------|--------|--------|--------|
| 91 | 是  | 否 | 是 | 女 | 135.00 | 80.00  | 138.00 | 82.00  |
| 81 | 是否 | 否 | 是 | 女 | 118.00 | 70.00  | 120.00 | 72.00  |
| 70 | 是  | 否 | 是 | 女 | 148.00 | 90.00  | 150.00 | 92.00  |
| 66 | 否  | 否 | 是 | 女 | 144.00 | 80.00  | 140.00 | 74.00  |
| 67 | 否  | 否 | 是 | 女 | 120.00 | 70.00  | 126.00 | 69.00  |
| 74 | 是  | 否 | 是 | 女 | 116.00 | 85.00  | 118.00 | 86.00  |
| 94 | 是  | 是 | 是 | 女 | 150.00 | 90.00  | 152.00 | 92.00  |
| 78 | 是否 | 否 | 是 | 女 | 134.00 | 66.00  | 138.00 | 70.00  |
| 69 | 是  | 否 | 是 | 女 | 138.00 | 80.00  | 140.00 | 80.00  |
| 74 | 是  | 是 | 是 | 女 | 157.00 | 84.00  | 159.00 | 88.00  |
| 72 | 是  | 否 | 是 | 女 | 129.00 | 86.00  | 122.00 | 78.00  |
| 72 | 是否 | 否 | 是 | 女 | 130.00 | 80.00  | 135.00 | 85.00  |
| 91 | 否  | 否 | 是 | 女 | 126.00 | 70.00  | 122.00 | 76.00  |
| 70 | 否  | 否 | 是 | 女 | 118.00 | 85.00  | 119.00 | 87.00  |
| 73 | 是  | 是 | 是 | 女 | 120.00 | 80.00  | 122.00 | 82.00  |
| 68 | 是  | 否 | 是 | 女 | 120.00 | 70.00  | 120.00 | 80.00  |
| 66 | 是否 | 否 | 否 | 女 | 118.00 | 62.00  | 116.00 | 60.00  |
| 73 | 是  | 否 | 是 | 女 | 130.00 | 80.00  | 134.00 | 78.00  |
| 69 | 是否 | 否 | 是 | 女 | 136.00 | 90.00  | 133.00 | 84.00  |
| 71 | 是  | 否 | 是 | 女 | 114.00 | 70.00  | 120.00 | 75.00  |
| 66 | 否  | 否 | 是 | 女 | 105.00 | 75.00  | 110.00 | 80.00  |
| 76 | 否  | 否 | 是 | 女 | 138.00 | 90.00  | 136.00 | 82.00  |
| 85 | 否  | 是 | 是 | 女 | 146.00 | 80.00  | 145.00 | 79.00  |
| 86 | 否  | 否 | 是 | 女 | 130.00 | 70.00  | 128.00 | 78.00  |
| 69 | 是  | 否 | 是 | 女 | 112.00 | 66.00  | 110.00 | 68.00  |
| 77 | 是否 | 否 | 是 | 女 | 110.00 | 88.00  | 130.00 | 85.00  |
| 68 | 是  | 否 | 是 | 女 | 110.00 | 68.00  | 112.00 | 66.00  |
| 72 | 是  | 否 | 是 | 女 | 138.00 | 86.00  | 139.00 | 87.00  |
| 70 | 是  | 是 | 是 | 女 | 136.00 | 70.00  | 138.00 | 60.00  |
| 76 | 是  | 否 | 是 | 女 | 100.00 | 60.00  | 102.00 | 64.00  |
| 67 | 否  | 否 | 是 | 女 | 120.00 | 75.00  | 122.00 | 78.00  |
| 80 | 是  | 否 | 是 | 女 | 130.00 | 76.00  | 130.00 | 78.00  |
| 75 | 是  | 是 | 是 | 女 | 169.00 | 78.00  | 164.00 | 67.00  |
| 97 | 是  | 否 | 是 | 女 | 130.00 | 80.00  | 132.00 | 82.00  |
| 79 | 是  | 否 | 是 | 女 | 150.00 | 80.00  | 169.00 | 84.00  |
| 75 | 是  | 否 | 是 | 女 | 110.00 | 70.00  | 120.00 | 73.00  |
| 85 | 是  | 否 | 是 | 女 | 140.00 | 80.00  | 140.00 | 90.00  |
| 85 | 是  | 是 | 是 | 女 | 112.00 | 70.00  | 120.00 | 78.00  |
| 78 | 是  | 否 | 是 | 女 | 140.00 | 80.00  | 152.00 | 92.00  |
| 67 | 是  | 是 | 是 | 女 | 135.00 | 78.00  | 124.00 | 79.00  |
| 69 | 是否 | 否 | 是 | 女 | 108.00 | 81.00  | 105.00 | 75.00  |
| 76 | 是  | 否 | 是 | 女 | 146.00 | 80.00  | 138.00 | 78.00  |
| 67 | 否  | 否 | 是 | 女 | 130.00 | 76.00  | 136.00 | 88.00  |
| 77 | 是  | 否 | 是 | 女 | 152.00 | 90.00  | 155.00 | 98.00  |
| 74 | 是否 | 否 | 是 | 女 | 175.00 | 95.00  | 169.00 | 89.00  |
| 95 | 是  | 否 | 是 | 女 | 160.00 | 90.00  | 162.00 | 90.00  |
| 71 | 是  | 否 | 是 | 女 | 167.00 | 99.00  | 170.00 | 102.00 |
| 72 | 是  | 否 | 是 | 女 | 136.00 | 86.00  | 138.00 | 88.00  |
| 72 | 是否 | 否 | 是 | 女 | 154.00 | 84.00  | 152.00 | 83.00  |
| 66 | 是  | 否 | 是 | 女 | 138.00 | 70.00  | 140.00 | 78.00  |
| 66 | 是  | 否 | 是 | 女 | 170.00 | 100.00 | 161.00 | 94.00  |

|    |   |   |   |   |        |       |        |        |
|----|---|---|---|---|--------|-------|--------|--------|
| 75 | 是 | 否 | 是 | 女 | 112.00 | 70.00 | 120.00 | 80.00  |
| 76 | 是 | 否 | 是 | 女 | 170.00 | 80.00 | 168.00 | 82.00  |
| 68 | 是 | 是 | 是 | 女 | 130.00 | 80.00 | 130.00 | 82.00  |
| 75 | 是 | 是 | 是 | 女 | 130.00 | 78.00 | 132.00 | 80.00  |
| 68 | 是 | 否 | 是 | 女 | 160.00 | 80.00 | 160.00 | 80.00  |
| 86 | 是 | 否 | 是 | 女 | 101.00 | 63.00 | 99.00  | 61.00  |
| 69 | 是 | 否 | 是 | 女 | 137.00 | 77.00 | 137.00 | 79.00  |
| 67 | 否 | 否 | 是 | 女 | 145.00 | 70.00 | 147.00 | 77.00  |
| 68 | 否 | 否 | 是 | 女 | 134.00 | 68.00 | 135.00 | 70.00  |
| 69 | 否 | 是 | 是 | 女 | 130.00 | 76.00 | 124.00 | 76.00  |
| 66 | 是 | 否 | 是 | 女 | 120.00 | 80.00 | 124.00 | 80.00  |
| 67 | 否 | 否 | 是 | 女 | 122.00 | 80.00 | 128.00 | 82.00  |
| 69 | 否 | 否 | 是 | 女 | 110.00 | 70.00 | 120.00 | 80.00  |
| 76 | 是 | 否 | 是 | 女 | 138.00 | 60.00 | 139.00 | 88.00  |
| 76 | 否 | 否 | 是 | 女 | 176.00 | 76.00 | 172.00 | 83.00  |
| 78 | 否 | 否 | 是 | 女 | 125.00 | 80.00 | 130.00 | 80.00  |
| 86 | 是 | 是 | 是 | 女 | 128.00 | 66.00 | 130.00 | 69.00  |
| 72 | 否 | 否 | 是 | 女 | 140.00 | 65.00 | 146.00 | 70.00  |
| 72 | 是 | 否 | 是 | 女 | 150.00 | 88.00 | 152.00 | 90.00  |
| 89 | 是 | 否 | 是 | 女 | 160.00 | 98.00 | 162.00 | 100.00 |
| 70 | 否 | 否 | 是 | 女 | 122.00 | 70.00 | 126.00 | 72.00  |
| 66 | 是 | 是 | 是 | 女 | 154.00 | 93.00 | 176.00 | 100.00 |
| 67 | 是 | 否 | 是 | 女 | 142.00 | 83.00 | 130.00 | 85.00  |
| 69 | 否 | 是 | 是 | 女 | 130.00 | 80.00 | 135.00 | 85.00  |
| 79 | 是 | 否 | 是 | 女 | 155.00 | 86.00 | 150.00 | 80.00  |
| 71 | 否 | 是 | 是 | 女 | 120.00 | 70.00 | 110.00 | 70.00  |
| 71 | 否 | 否 | 是 | 女 | 150.00 | 90.00 | 152.00 | 90.00  |
| 69 | 否 | 是 | 是 | 女 | 145.00 | 78.00 | 146.00 | 80.00  |
| 74 | 否 | 否 | 是 | 女 | 120.00 | 60.00 | 123.00 | 60.00  |
| 73 | 是 | 否 | 是 | 女 | 140.00 | 76.00 | 138.00 | 80.00  |
| 67 | 是 | 否 | 是 | 女 | 133.00 | 93.00 | 140.00 | 91.00  |
| 67 | 否 | 否 | 是 | 女 | 136.00 | 80.00 | 138.00 | 82.00  |
| 87 | 是 | 否 | 是 | 女 | 150.00 | 70.00 | 170.00 | 74.00  |
| 70 | 否 | 否 | 是 | 女 | 135.00 | 79.00 | 133.00 | 78.00  |
| 66 | 否 | 否 | 是 | 女 | 136.00 | 88.00 | 130.00 | 85.00  |
| 67 | 是 | 否 | 是 | 女 | 160.00 | 90.00 | 176.00 | 92.00  |
| 66 | 是 | 否 | 否 | 女 | 140.00 | 82.00 | 140.00 | 84.00  |
| 67 | 否 | 否 | 是 | 女 | 164.00 | 90.00 | 170.00 | 90.00  |
| 85 | 否 | 否 | 是 | 女 | 156.00 | 90.00 | 161.00 | 90.00  |
| 80 | 是 | 否 | 是 | 女 | 145.00 | 85.00 | 149.00 | 88.00  |
| 72 | 是 | 否 | 是 | 女 | 140.00 | 80.00 | 130.00 | 70.00  |
| 71 | 是 | 是 | 是 | 女 | 136.00 | 82.00 | 138.00 | 88.00  |
| 76 | 否 | 否 | 是 | 女 | 139.00 | 86.00 | 140.00 | 90.00  |
| 67 | 否 | 否 | 是 | 女 | 110.00 | 80.00 | 126.00 | 75.00  |
| 79 | 否 | 否 | 是 | 女 | 153.00 | 83.00 | 160.00 | 99.00  |
| 80 | 是 | 否 | 是 | 女 | 110.00 | 72.00 | 118.00 | 74.00  |
| 67 | 否 | 否 | 是 | 女 | 108.00 | 76.00 | 110.00 | 80.00  |
| 78 | 否 | 否 | 是 | 女 | 163.00 | 88.00 | 165.00 | 89.00  |
| 73 | 是 | 否 | 是 | 女 | 148.00 | 80.00 | 144.00 | 78.00  |
| 83 | 否 | 否 | 是 | 女 | 128.00 | 72.00 | 130.00 | 74.00  |
| 77 | 是 | 否 | 是 | 女 | 160.00 | 95.00 | 159.00 | 96.00  |

|    |   |   |   |   |        |        |        |        |
|----|---|---|---|---|--------|--------|--------|--------|
| 76 | 否 | 否 | 是 | 女 | 128.00 | 86.00  | 130.00 | 88.00  |
| 71 | 是 | 否 | 是 | 女 | 129.00 | 78.00  | 134.00 | 82.00  |
| 70 | 否 | 否 | 是 | 女 | 110.00 | 68.00  | 128.00 | 66.00  |
| 85 | 是 | 是 | 是 | 女 | 124.00 | 82.00  | 130.00 | 80.00  |
| 76 | 是 | 是 | 是 | 女 | 116.00 | 74.00  | 119.00 | 77.00  |
| 69 | 否 | 否 | 是 | 女 | 170.00 | 94.00  | 174.00 | 96.00  |
| 77 | 是 | 否 | 是 | 女 | 120.00 | 66.00  | 126.00 | 68.00  |
| 72 | 是 | 否 | 是 | 女 | 115.00 | 76.00  | 118.00 | 80.00  |
| 70 | 否 | 否 | 是 | 女 | 110.00 | 78.00  | 110.00 | 80.00  |
| 71 | 是 | 否 | 是 | 女 | 150.00 | 66.00  | 152.00 | 66.00  |
| 79 | 是 | 是 | 是 | 女 | 131.00 | 88.00  | 143.00 | 88.00  |
| 66 | 否 | 否 | 是 | 女 | 134.00 | 80.00  | 140.00 | 86.00  |
| 74 | 否 | 是 | 是 | 女 | 154.00 | 92.00  | 160.00 | 100.00 |
| 79 | 是 | 否 | 是 | 女 | 115.00 | 70.00  | 120.00 | 76.00  |
| 66 | 否 | 否 | 是 | 女 | 138.00 | 70.00  | 140.00 | 65.00  |
| 71 | 是 | 否 | 是 | 女 | 162.00 | 101.00 | 170.00 | 105.00 |
| 80 | 是 | 否 | 是 | 女 | 128.00 | 80.00  | 138.00 | 83.00  |
| 79 | 否 | 否 | 是 | 女 | 110.00 | 70.00  | 108.00 | 68.00  |
| 77 | 是 | 否 | 是 | 女 | 132.00 | 60.00  | 126.00 | 64.00  |
| 80 | 否 | 否 | 是 | 女 | 104.00 | 70.00  | 106.00 | 70.00  |
| 71 | 否 | 否 | 是 | 女 | 136.00 | 70.00  | 138.00 | 72.00  |
| 77 | 是 | 否 | 是 | 女 | 108.00 | 72.00  | 110.00 | 70.00  |
| 76 | 是 | 否 | 是 | 女 | 136.00 | 82.00  | 136.00 | 80.00  |
| 69 | 是 | 否 | 是 | 女 | 168.00 | 88.00  | 170.00 | 80.00  |
| 74 | 是 | 是 | 是 | 女 | 160.00 | 80.00  | 165.00 | 90.00  |
| 85 | 否 | 否 | 是 | 女 | 139.00 | 89.00  | 140.00 | 90.00  |
| 75 | 是 | 否 | 是 | 女 | 128.00 | 84.00  | 130.00 | 80.00  |
| 66 | 是 | 否 | 是 | 女 | 132.00 | 78.00  | 136.00 | 80.00  |
| 70 | 是 | 否 | 是 | 女 | 143.00 | 88.00  | 141.00 | 88.00  |
| 85 | 否 | 否 | 是 | 女 | 117.00 | 76.00  | 126.00 | 82.00  |
| 71 | 是 | 否 | 是 | 女 | 158.00 | 96.00  | 158.00 | 94.00  |
| 75 | 是 | 否 | 是 | 女 | 155.00 | 65.00  | 160.00 | 70.00  |
| 75 | 是 | 否 | 是 | 女 | 135.00 | 84.00  | 138.00 | 88.00  |
| 72 | 否 | 否 | 是 | 女 | 136.00 | 80.00  | 140.00 | 80.00  |
| 75 | 是 | 否 | 是 | 女 | 154.00 | 89.00  | 158.00 | 88.00  |
| 76 | 否 | 否 | 是 | 女 | 140.00 | 80.00  | 145.00 | 86.00  |
| 71 | 是 | 是 | 是 | 女 | 133.00 | 84.00  | 136.00 | 86.00  |
| 77 | 否 | 否 | 是 | 女 | 136.00 | 70.00  | 137.00 | 86.00  |
| 79 | 是 | 否 | 是 | 女 | 135.00 | 70.00  | 145.00 | 80.00  |
| 80 | 是 | 否 | 是 | 女 | 146.00 | 89.00  | 138.00 | 88.00  |
| 67 | 是 | 否 | 是 | 女 | 130.00 | 86.00  | 137.00 | 79.00  |
| 72 | 是 | 否 | 是 | 女 | 130.00 | 80.00  | 138.00 | 86.00  |
| 83 | 是 | 否 | 是 | 女 | 130.00 | 65.00  | 136.00 | 70.00  |
| 74 | 否 | 否 | 是 | 女 | 148.00 | 78.00  | 144.00 | 76.00  |
| 73 | 是 | 否 | 是 | 女 | 125.00 | 90.00  | 127.00 | 93.00  |
| 69 | 是 | 否 | 是 | 女 | 115.00 | 79.00  | 110.00 | 75.00  |
| 81 | 否 | 否 | 是 | 女 | 100.00 | 60.00  | 102.00 | 60.00  |
| 67 | 是 | 否 | 是 | 女 | 136.00 | 80.00  | 140.00 | 88.00  |
| 70 | 否 | 是 | 是 | 女 | 100.00 | 60.00  | 94.00  | 65.00  |
| 79 | 否 | 否 | 是 | 女 | 144.00 | 86.00  | 146.00 | 88.00  |
| 68 | 是 | 否 | 是 | 女 | 141.00 | 66.00  | 158.00 | 65.00  |

|    |   |   |   |   |        |        |        |        |
|----|---|---|---|---|--------|--------|--------|--------|
| 68 | 是 | 否 | 是 | 女 | 120.00 | 74.00  | 124.00 | 74.00  |
| 69 | 是 | 否 | 是 | 女 | 130.00 | 70.00  | 139.00 | 80.00  |
| 81 | 是 | 否 | 是 | 女 | 130.00 | 70.00  | 133.00 | 68.00  |
| 69 | 是 | 是 | 是 | 女 | 156.00 | 77.00  | 147.00 | 78.00  |
| 69 | 是 | 否 | 是 | 女 | 138.00 | 80.00  | 138.00 | 82.00  |
| 69 | 是 | 是 | 是 | 女 | 134.00 | 80.00  | 140.00 | 86.00  |
| 69 | 是 | 是 | 是 | 女 | 150.00 | 80.00  | 154.00 | 80.00  |
| 94 | 否 | 是 | 是 | 女 | 110.00 | 70.00  | 120.00 | 80.00  |
| 72 | 是 | 是 | 是 | 女 | 139.00 | 85.00  | 137.00 | 81.00  |
| 66 | 否 | 否 | 是 | 女 | 90.00  | 60.00  | 92.00  | 61.00  |
| 67 | 否 | 否 | 是 | 女 | 150.00 | 80.00  | 155.00 | 85.00  |
| 73 | 是 | 否 | 是 | 女 | 135.00 | 70.00  | 140.00 | 70.00  |
| 79 | 是 | 否 | 是 | 女 | 176.00 | 91.00  | 152.00 | 80.00  |
| 74 | 否 | 否 | 是 | 女 | 132.00 | 80.00  | 130.00 | 80.00  |
| 85 | 是 | 否 | 是 | 女 | 130.00 | 76.00  | 126.00 | 70.00  |
| 70 | 否 | 否 | 是 | 女 | 130.00 | 80.00  | 125.00 | 70.00  |
| 68 | 是 | 是 | 是 | 女 | 128.00 | 88.00  | 130.00 | 90.00  |
| 69 | 否 | 否 | 是 | 女 | 130.00 | 80.00  | 122.00 | 78.00  |
| 76 | 否 | 否 | 是 | 女 | 180.00 | 94.00  | 182.00 | 96.00  |
| 84 | 是 | 是 | 是 | 女 | 120.00 | 90.00  | 118.00 | 88.00  |
| 69 | 是 | 否 | 是 | 女 | 132.00 | 80.00  | 135.00 | 85.00  |
| 68 | 否 | 否 | 是 | 女 | 112.00 | 72.00  | 110.00 | 70.00  |
| 67 | 否 | 否 | 是 | 女 | 130.00 | 88.00  | 138.00 | 89.00  |
| 67 | 否 | 否 | 是 | 女 | 120.00 | 70.00  | 124.00 | 70.00  |
| 80 | 是 | 是 | 是 | 女 | 135.00 | 82.00  | 137.00 | 83.00  |
| 66 | 是 | 否 | 是 | 女 | 163.00 | 88.00  | 175.00 | 97.00  |
| 71 | 是 | 是 | 是 | 女 | 138.00 | 80.00  | 136.00 | 80.00  |
| 69 | 是 | 否 | 是 | 女 | 125.00 | 75.00  | 126.00 | 77.00  |
| 82 | 是 | 是 | 是 | 女 | 136.00 | 70.00  | 140.00 | 70.00  |
| 68 | 是 | 否 | 是 | 女 | 130.00 | 80.00  | 120.00 | 75.00  |
| 73 | 是 | 否 | 是 | 女 | 122.00 | 68.00  | 130.00 | 70.00  |
| 72 | 是 | 否 | 是 | 女 | 148.00 | 91.00  | 157.00 | 91.00  |
| 69 | 是 | 否 | 是 | 女 | 105.00 | 71.00  | 100.00 | 70.00  |
| 72 | 否 | 否 | 是 | 女 | 130.00 | 68.00  | 133.00 | 72.00  |
| 86 | 是 | 否 | 是 | 女 | 170.00 | 100.00 | 180.00 | 100.00 |
| 73 | 是 | 是 | 是 | 女 | 152.00 | 92.00  | 154.00 | 98.00  |
| 69 | 是 | 否 | 是 | 女 | 136.00 | 70.00  | 140.00 | 72.00  |
| 71 | 是 | 是 | 是 | 女 | 126.00 | 70.00  | 128.00 | 72.00  |
| 75 | 否 | 否 | 是 | 女 | 120.00 | 80.00  | 125.00 | 76.00  |
| 77 | 是 | 否 | 是 | 女 | 130.00 | 78.00  | 132.00 | 76.00  |
| 98 | 否 | 否 | 是 | 女 | 136.00 | 86.00  | 132.00 | 80.00  |
| 66 | 否 | 否 | 是 | 女 | 180.00 | 80.00  | 185.00 | 79.00  |
| 68 | 是 | 否 | 是 | 女 | 132.00 | 86.00  | 130.00 | 80.00  |
| 70 | 是 | 否 | 是 | 女 | 150.00 | 92.00  | 152.00 | 90.00  |
| 76 | 否 | 否 | 是 | 女 | 138.00 | 80.00  | 130.00 | 75.00  |
| 75 | 是 | 否 | 是 | 女 | 130.00 | 70.00  | 128.00 | 66.00  |
| 75 | 是 | 否 | 是 | 女 | 135.00 | 82.00  | 138.00 | 79.00  |
| 67 | 否 | 否 | 是 | 女 | 150.00 | 74.00  | 155.00 | 80.00  |
| 71 | 否 | 否 | 是 | 女 | 138.00 | 80.00  | 160.00 | 100.00 |
| 70 | 是 | 否 | 是 | 女 | 110.00 | 65.00  | 118.00 | 66.00  |
| 90 | 是 | 否 | 是 | 女 | 150.00 | 90.00  | 155.00 | 96.00  |

|    |   |   |   |   |        |       |        |        |
|----|---|---|---|---|--------|-------|--------|--------|
| 69 | 是 | 否 | 是 | 女 | 135.00 | 75.00 | 139.00 | 88.00  |
| 67 | 否 | 否 | 是 | 女 | 122.00 | 80.00 | 120.00 | 78.00  |
| 74 | 否 | 否 | 是 | 女 | 106.00 | 60.00 | 107.00 | 57.00  |
| 70 | 是 | 是 | 是 | 女 | 138.00 | 80.00 | 140.00 | 76.00  |
| 66 | 否 | 否 | 是 | 女 | 132.00 | 75.00 | 137.00 | 79.00  |
| 80 | 是 | 否 | 是 | 女 | 170.00 | 90.00 | 180.00 | 100.00 |
| 78 | 是 | 否 | 是 | 女 | 150.00 | 80.00 | 152.00 | 81.00  |
| 67 | 是 | 否 | 是 | 女 | 132.00 | 84.00 | 142.00 | 88.00  |
| 77 | 否 | 否 | 是 | 女 | 100.00 | 60.00 | 104.00 | 62.00  |
| 70 | 是 | 否 | 是 | 女 | 136.00 | 90.00 | 140.00 | 90.00  |
| 71 | 否 | 否 | 是 | 女 | 142.00 | 85.00 | 148.00 | 90.00  |
| 95 | 是 | 是 | 是 | 女 | 132.00 | 70.00 | 136.00 | 74.00  |
| 73 | 是 | 是 | 是 | 女 | 140.00 | 98.00 | 150.00 | 100.00 |
| 88 | 是 | 是 | 是 | 女 | 134.00 | 63.00 | 129.00 | 85.00  |
| 86 | 是 | 否 | 是 | 女 | 159.00 | 86.00 | 160.00 | 86.00  |
| 88 | 是 | 是 | 是 | 女 | 129.00 | 80.00 | 130.00 | 85.00  |
| 66 | 是 | 否 | 是 | 女 | 118.00 | 78.00 | 120.00 | 80.00  |
| 73 | 否 | 否 | 是 | 女 | 123.00 | 69.00 | 131.00 | 75.00  |
| 76 | 是 | 否 | 是 | 女 | 110.00 | 66.00 | 108.00 | 64.00  |
| 72 | 是 | 否 | 是 | 女 | 170.00 | 98.00 | 172.00 | 100.00 |
| 74 | 是 | 否 | 是 | 女 | 130.00 | 80.00 | 125.00 | 80.00  |
| 69 | 否 | 否 | 是 | 女 | 123.00 | 80.00 | 123.00 | 82.00  |
| 74 | 否 | 否 | 是 | 女 | 137.00 | 91.00 | 142.00 | 94.00  |
| 71 | 是 | 否 | 是 | 女 | 140.00 | 90.00 | 150.00 | 96.00  |
| 68 | 是 | 否 | 是 | 女 | 142.00 | 80.00 | 140.00 | 80.00  |
| 71 | 否 | 否 | 是 | 女 | 138.00 | 82.00 | 138.00 | 86.00  |
| 83 | 是 | 否 | 是 | 女 | 120.00 | 70.00 | 128.00 | 74.00  |
| 81 | 是 | 否 | 是 | 女 | 135.00 | 75.00 | 130.00 | 70.00  |
| 73 | 否 | 是 | 是 | 女 | 130.00 | 82.00 | 129.00 | 80.00  |
| 78 | 否 | 否 | 是 | 女 | 100.00 | 68.00 | 108.00 | 68.00  |
| 68 | 否 | 否 | 是 | 女 | 108.00 | 72.00 | 110.00 | 74.00  |
| 72 | 是 | 否 | 是 | 女 | 162.00 | 78.00 | 170.00 | 80.00  |
| 86 | 是 | 是 | 是 | 女 | 162.00 | 88.00 | 163.00 | 89.00  |
| 86 | 是 | 否 | 是 | 女 | 130.00 | 90.00 | 138.00 | 90.00  |
| 84 | 是 | 否 | 是 | 女 | 136.00 | 80.00 | 130.00 | 82.00  |
| 72 | 否 | 否 | 是 | 女 | 118.00 | 76.00 | 126.00 | 80.00  |
| 78 | 否 | 否 | 是 | 女 | 128.00 | 70.00 | 131.00 | 76.00  |
| 66 | 是 | 否 | 是 | 女 | 149.00 | 88.00 | 150.00 | 89.00  |
| 75 | 是 | 是 | 是 | 女 | 126.00 | 72.00 | 126.00 | 74.00  |
| 68 | 是 | 否 | 是 | 女 | 139.00 | 90.00 | 135.00 | 88.00  |
| 70 | 是 | 是 | 是 | 女 | 138.00 | 77.00 | 139.00 | 87.00  |
| 75 | 是 | 是 | 是 | 女 | 131.00 | 80.00 | 120.00 | 78.00  |
| 70 | 否 | 否 | 是 | 女 | 118.00 | 64.00 | 120.00 | 70.00  |
| 72 | 是 | 否 | 是 | 女 | 130.00 | 72.00 | 132.00 | 74.00  |
| 70 | 是 | 否 | 是 | 女 | 134.00 | 78.00 | 140.00 | 80.00  |
| 73 | 否 | 否 | 是 | 女 | 121.00 | 78.00 | 121.00 | 81.00  |
| 70 | 否 | 否 | 是 | 女 | 118.00 | 70.00 | 120.00 | 70.00  |
| 72 | 是 | 是 | 是 | 女 | 124.00 | 74.00 | 130.00 | 78.00  |
| 68 | 否 | 否 | 是 | 女 | 140.00 | 80.00 | 120.00 | 70.00  |
| 76 | 是 | 否 | 是 | 女 | 112.00 | 80.00 | 116.00 | 81.00  |
| 93 | 否 | 否 | 是 | 女 | 134.00 | 82.00 | 134.00 | 84.00  |

|    |    |   |   |   |        |        |        |       |
|----|----|---|---|---|--------|--------|--------|-------|
| 72 | 是  | 是 | 是 | 女 | 139.00 | 70.00  | 140.00 | 76.00 |
| 77 | 是否 | 是 | 是 | 女 | 122.00 | 70.00  | 126.00 | 70.00 |
| 74 | 是  | 否 | 是 | 女 | 164.00 | 100.00 | 130.00 | 90.00 |
| 71 | 是  | 否 | 是 | 女 | 150.00 | 88.00  | 158.00 | 90.00 |
| 89 | 否  | 否 | 是 | 女 | 132.00 | 60.00  | 128.00 | 66.00 |
| 75 | 否  | 是 | 是 | 女 | 136.00 | 70.00  | 140.00 | 72.00 |
| 69 | 是  | 否 | 是 | 女 | 139.00 | 82.00  | 132.00 | 80.00 |
| 74 | 是  | 是 | 是 | 女 | 126.00 | 60.00  | 129.00 | 72.00 |
| 66 | 是  | 否 | 是 | 女 | 139.00 | 99.00  | 135.00 | 89.00 |
| 68 | 否  | 否 | 是 | 女 | 139.00 | 85.00  | 136.00 | 84.00 |
| 66 | 否  | 否 | 是 | 女 | 164.00 | 97.00  | 143.00 | 87.00 |
| 68 | 是  | 否 | 是 | 女 | 120.00 | 78.00  | 124.00 | 80.00 |
| 66 | 是  | 是 | 是 | 女 | 112.00 | 72.00  | 116.00 | 74.00 |
| 67 | 是  | 否 | 是 | 女 | 140.00 | 80.00  | 144.00 | 88.00 |
| 77 | 是  | 否 | 是 | 女 | 138.00 | 70.00  | 140.00 | 78.00 |
| 85 | 是  | 否 | 是 | 女 | 139.00 | 75.00  | 138.00 | 89.00 |
| 79 | 否  | 否 | 是 | 女 | 139.00 | 86.00  | 137.00 | 85.00 |
| 71 | 是  | 否 | 是 | 女 | 151.00 | 85.00  | 162.00 | 89.00 |
| 66 | 否  | 否 | 是 | 女 | 124.00 | 70.00  | 128.00 | 70.00 |
| 69 | 是  | 否 | 是 | 女 | 139.00 | 76.00  | 146.00 | 69.00 |
| 83 | 否  | 否 | 是 | 女 | 124.00 | 74.00  | 126.00 | 76.00 |
| 80 | 是  | 否 | 是 | 女 | 138.00 | 80.00  | 140.00 | 82.00 |
| 72 | 是  | 是 | 是 | 女 | 130.00 | 74.00  | 132.00 | 78.00 |
| 77 | 否  | 是 | 是 | 女 | 130.00 | 70.00  | 130.00 | 74.00 |
| 72 | 否  | 否 | 是 | 女 | 110.00 | 80.00  | 112.00 | 85.00 |
| 67 | 否  | 否 | 是 | 女 | 139.00 | 89.00  | 130.00 | 80.00 |
| 73 | 否  | 否 | 是 | 女 | 134.00 | 82.00  | 139.00 | 89.00 |
| 73 | 是  | 否 | 是 | 女 | 118.00 | 67.00  | 122.00 | 74.00 |
| 70 | 是  | 是 | 是 | 女 | 135.00 | 76.00  | 140.00 | 78.00 |
| 73 | 是  | 否 | 是 | 女 | 138.00 | 88.00  | 138.00 | 89.00 |
| 90 | 是  | 否 | 是 | 女 | 150.00 | 80.00  | 158.00 | 89.00 |
| 72 | 否  | 否 | 是 | 女 | 134.00 | 86.00  | 135.00 | 85.00 |
| 76 | 是  | 否 | 是 | 女 | 135.00 | 86.00  | 137.00 | 91.00 |
| 68 | 是  | 否 | 是 | 女 | 125.00 | 82.00  | 125.00 | 74.00 |
| 71 | 是  | 否 | 是 | 女 | 138.00 | 80.00  | 140.00 | 82.00 |
| 67 | 否  | 否 | 是 | 女 | 130.00 | 70.00  | 120.00 | 80.00 |
| 85 | 是  | 否 | 是 | 女 | 134.00 | 80.00  | 138.00 | 80.00 |
| 66 | 是  | 是 | 否 | 女 | 131.00 | 86.00  | 140.00 | 90.00 |
| 72 | 否  | 否 | 是 | 女 | 164.00 | 89.00  | 170.00 | 98.00 |
| 87 | 是  | 否 | 是 | 女 | 159.00 | 90.00  | 174.00 | 85.00 |
| 70 | 是  | 否 | 是 | 女 | 133.00 | 80.00  | 136.00 | 83.00 |
| 70 | 否  | 否 | 是 | 女 | 138.00 | 86.00  | 139.00 | 89.00 |
| 80 | 是  | 否 | 是 | 女 | 150.00 | 80.00  | 146.00 | 76.00 |
| 89 | 是  | 否 | 是 | 女 | 140.00 | 82.00  | 142.00 | 82.00 |
| 77 | 是  | 否 | 是 | 女 | 139.00 | 89.00  | 135.00 | 88.00 |
| 98 | 是  | 否 | 是 | 女 | 108.00 | 90.00  | 110.00 | 86.00 |
| 82 | 是  | 否 | 是 | 女 | 145.00 | 89.00  | 140.00 | 85.00 |
| 70 | 是  | 是 | 是 | 女 | 118.00 | 70.00  | 120.00 | 79.00 |
| 97 | 是  | 否 | 是 | 女 | 132.00 | 70.00  | 134.00 | 74.00 |
| 74 | 是  | 是 | 是 | 女 | 128.00 | 65.00  | 130.00 | 68.00 |
| 67 | 否  | 否 | 是 | 女 | 136.00 | 78.00  | 139.00 | 80.00 |

|    |   |   |   |   |        |       |        |       |
|----|---|---|---|---|--------|-------|--------|-------|
| 68 | 是 | 否 | 是 | 女 | 136.00 | 86.00 | 139.00 | 89.00 |
| 74 | 否 | 否 | 是 | 女 | 120.00 | 70.00 | 130.00 | 75.00 |
| 87 | 是 | 否 | 是 | 女 | 120.00 | 64.00 | 124.00 | 64.00 |
| 83 | 是 | 否 | 是 | 女 | 170.00 | 86.00 | 172.00 | 85.00 |
| 74 | 是 | 否 | 是 | 女 | 124.00 | 65.00 | 126.00 | 70.00 |
| 74 | 是 | 否 | 是 | 女 | 130.00 | 72.00 | 132.00 | 74.00 |
| 83 | 否 | 否 | 是 | 女 | 120.00 | 70.00 | 116.00 | 65.00 |
| 70 | 是 | 否 | 是 | 女 | 142.00 | 94.00 | 144.00 | 94.00 |
| 67 | 是 | 否 | 是 | 女 | 110.00 | 80.00 | 114.00 | 82.00 |
| 85 | 是 | 否 | 是 | 女 | 109.00 | 67.00 | 108.00 | 68.00 |
| 69 | 否 | 否 | 是 | 女 | 126.00 | 78.00 | 120.00 | 80.00 |
| 75 | 否 | 否 | 是 | 女 | 130.00 | 80.00 | 120.00 | 70.00 |
| 70 | 否 | 否 | 是 | 女 | 145.00 | 95.00 | 150.00 | 90.00 |
| 76 | 是 | 否 | 是 | 女 | 126.00 | 83.00 | 125.00 | 80.00 |
| 73 | 是 | 否 | 是 | 女 | 150.00 | 78.00 | 155.00 | 80.00 |
| 68 | 否 | 否 | 是 | 女 | 139.00 | 83.00 | 135.00 | 82.00 |
| 69 | 是 | 否 | 是 | 女 | 125.00 | 75.00 | 130.00 | 80.00 |
| 77 | 否 | 否 | 是 | 女 | 130.00 | 80.00 | 134.00 | 82.00 |
| 66 | 是 | 否 | 是 | 女 | 134.00 | 80.00 | 135.00 | 82.00 |
| 75 | 否 | 否 | 是 | 女 | 130.00 | 80.00 | 128.00 | 82.00 |
| 75 | 否 | 否 | 是 | 女 | 137.00 | 96.00 | 138.00 | 97.00 |
| 69 | 是 | 否 | 是 | 女 | 132.00 | 88.00 | 130.00 | 78.00 |
| 77 | 是 | 是 | 是 | 女 | 138.00 | 78.00 | 140.00 | 80.00 |
| 74 | 是 | 否 | 是 | 女 | 144.00 | 82.00 | 133.00 | 82.00 |
| 73 | 否 | 否 | 是 | 女 | 140.00 | 82.00 | 142.00 | 80.00 |
| 75 | 是 | 是 | 是 | 女 | 110.00 | 60.00 | 112.00 | 76.00 |
| 95 | 是 | 否 | 是 | 女 | 120.00 | 60.00 | 122.00 | 68.00 |
| 69 | 是 | 是 | 是 | 女 | 135.00 | 85.00 | 139.00 | 89.00 |
| 79 | 否 | 否 | 是 | 女 | 110.00 | 78.00 | 108.00 | 76.00 |
| 76 | 是 | 否 | 是 | 女 | 160.00 | 78.00 | 162.00 | 78.00 |
| 73 | 是 | 否 | 是 | 女 | 138.00 | 88.00 | 139.00 | 85.00 |
| 72 | 是 | 否 | 是 | 女 | 138.00 | 80.00 | 134.00 | 82.00 |
| 87 | 是 | 否 | 是 | 女 | 140.00 | 88.00 | 142.00 | 88.00 |
| 72 | 否 | 否 | 是 | 女 | 142.00 | 80.00 | 146.00 | 90.00 |
| 69 | 否 | 是 | 是 | 女 | 140.00 | 89.00 | 138.00 | 90.00 |
| 76 | 否 | 否 | 是 | 女 | 150.00 | 84.00 | 150.00 | 82.00 |
| 92 | 是 | 是 | 是 | 女 | 110.00 | 60.00 | 117.00 | 63.00 |
| 66 | 是 | 否 | 是 | 女 | 116.00 | 70.00 | 120.00 | 76.00 |
| 68 | 否 | 否 | 是 | 女 | 132.00 | 75.00 | 135.00 | 80.00 |
| 82 | 是 | 否 | 是 | 女 | 128.00 | 72.00 | 130.00 | 80.00 |
| 68 | 否 | 否 | 是 | 女 | 134.00 | 93.00 | 139.00 | 96.00 |
| 72 | 否 | 否 | 是 | 女 | 124.00 | 70.00 | 126.00 | 74.00 |
| 74 | 是 | 否 | 是 | 女 | 145.00 | 85.00 | 140.00 | 82.00 |
| 73 | 是 | 否 | 是 | 女 | 128.00 | 76.00 | 130.00 | 78.00 |
| 71 | 否 | 否 | 是 | 女 | 153.00 | 89.00 | 163.00 | 92.00 |
| 70 | 否 | 否 | 是 | 女 | 124.00 | 78.00 | 126.00 | 80.00 |
| 91 | 是 | 否 | 是 | 女 | 120.00 | 70.00 | 120.00 | 74.00 |
| 71 | 是 | 否 | 是 | 女 | 139.00 | 84.00 | 136.00 | 86.00 |
| 67 | 否 | 否 | 是 | 女 | 110.00 | 65.00 | 100.00 | 65.00 |
| 75 | 是 | 否 | 是 | 女 | 130.00 | 70.00 | 132.00 | 76.00 |
| 74 | 否 | 否 | 是 | 女 | 120.00 | 75.00 | 125.00 | 78.00 |

|    |    |   |   |   |        |        |        |       |
|----|----|---|---|---|--------|--------|--------|-------|
| 68 | 是  | 否 | 是 | 女 | 140.00 | 90.00  | 137.00 | 89.00 |
| 84 | 是否 | 否 | 是 | 女 | 138.00 | 58.00  | 136.00 | 70.00 |
| 78 | 否  | 否 | 是 | 女 | 125.00 | 67.00  | 130.00 | 80.00 |
| 68 | 是  | 否 | 是 | 女 | 110.00 | 69.00  | 115.00 | 72.00 |
| 71 | 否  | 是 | 是 | 女 | 100.00 | 61.00  | 98.00  | 62.00 |
| 73 | 是  | 否 | 是 | 女 | 116.00 | 72.00  | 114.00 | 69.00 |
| 68 | 是  | 否 | 是 | 女 | 156.00 | 94.00  | 154.00 | 94.00 |
| 68 | 是  | 否 | 是 | 女 | 180.00 | 100.00 | 175.00 | 95.00 |
| 70 | 是否 | 否 | 是 | 女 | 133.00 | 74.00  | 133.00 | 76.00 |
| 67 | 是  | 否 | 是 | 女 | 118.00 | 72.00  | 120.00 | 74.00 |
| 75 | 是  | 否 | 是 | 女 | 178.00 | 88.00  | 172.00 | 78.00 |
| 67 | 是  | 否 | 是 | 女 | 118.00 | 78.00  | 120.00 | 80.00 |
| 74 | 否  | 否 | 是 | 女 | 115.00 | 70.00  | 115.00 | 76.00 |
| 74 | 否  | 否 | 是 | 女 | 122.00 | 74.00  | 120.00 | 70.00 |
| 70 | 是  | 否 | 是 | 女 | 156.00 | 82.00  | 160.00 | 87.00 |
| 77 | 是  | 是 | 是 | 女 | 136.00 | 89.00  | 155.00 | 85.00 |
| 75 | 是否 | 否 | 是 | 女 | 138.00 | 90.00  | 130.00 | 80.00 |
| 71 | 是  | 否 | 是 | 女 | 138.00 | 75.00  | 140.00 | 79.00 |
| 69 | 是  | 否 | 是 | 女 | 150.00 | 82.00  | 158.00 | 80.00 |
| 84 | 是  | 否 | 是 | 女 | 144.00 | 79.00  | 144.00 | 85.00 |
| 84 | 是否 | 否 | 是 | 女 | 148.00 | 77.00  | 168.00 | 77.00 |
| 71 | 否  | 否 | 是 | 女 | 110.00 | 64.00  | 108.00 | 70.00 |
| 67 | 是  | 否 | 是 | 女 | 142.00 | 92.00  | 148.00 | 98.00 |
| 74 | 否  | 否 | 是 | 女 | 140.00 | 89.00  | 145.00 | 90.00 |
| 82 | 是  | 否 | 是 | 女 | 110.00 | 60.00  | 112.00 | 68.00 |
| 66 | 是  | 否 | 是 | 女 | 140.00 | 88.00  | 145.00 | 90.00 |
| 67 | 是否 | 否 | 是 | 女 | 130.00 | 84.00  | 133.00 | 86.00 |
| 67 | 否  | 是 | 是 | 女 | 132.00 | 84.00  | 130.00 | 80.00 |
| 77 | 否  | 是 | 是 | 女 | 138.00 | 80.00  | 136.00 | 82.00 |
| 66 | 否  | 否 | 是 | 女 | 135.00 | 64.00  | 138.00 | 79.00 |
| 92 | 是  | 否 | 是 | 女 | 148.00 | 88.00  | 159.00 | 89.00 |
| 80 | 是否 | 否 | 是 | 女 | 108.00 | 60.00  | 110.00 | 62.00 |
| 90 | 否  | 否 | 是 | 女 | 134.00 | 86.00  | 136.00 | 88.00 |
| 71 | 是  | 否 | 是 | 女 | 149.00 | 89.00  | 147.00 | 87.00 |
| 68 | 是  | 是 | 是 | 女 | 138.00 | 63.00  | 140.00 | 79.00 |
| 70 | 是  | 否 | 是 | 女 | 120.00 | 80.00  | 121.00 | 82.00 |
| 82 | 是  | 是 | 是 | 女 | 133.00 | 78.00  | 135.00 | 80.00 |
| 71 | 是否 | 否 | 是 | 女 | 133.00 | 85.00  | 136.00 | 88.00 |
| 72 | 否  | 否 | 是 | 女 | 120.00 | 70.00  | 122.00 | 72.00 |
| 72 | 否  | 否 | 是 | 女 | 135.00 | 83.00  | 138.00 | 86.00 |
| 95 | 是  | 否 | 是 | 女 | 135.00 | 85.00  | 140.00 | 90.00 |
| 67 | 是否 | 否 | 是 | 女 | 137.00 | 80.00  | 140.00 | 82.00 |
| 93 | 是  | 否 | 是 | 女 | 112.00 | 74.00  | 116.00 | 78.00 |
| 81 | 是否 | 否 | 是 | 女 | 118.00 | 78.00  | 120.00 | 80.00 |
| 74 | 是  | 否 | 是 | 女 | 120.00 | 80.00  | 118.00 | 78.00 |
| 67 | 是  | 否 | 是 | 女 | 142.00 | 83.00  | 145.00 | 85.00 |
| 66 | 是否 | 否 | 是 | 女 | 135.00 | 78.00  | 130.00 | 70.00 |
| 92 | 是  | 否 | 是 | 女 | 122.00 | 78.00  | 120.00 | 80.00 |
| 77 | 是否 | 是 | 是 | 女 | 120.00 | 70.00  | 122.00 | 84.00 |
| 69 | 是  | 否 | 是 | 女 | 152.00 | 70.00  | 155.00 | 77.00 |
| 77 | 否  | 否 | 是 | 女 | 128.00 | 70.00  | 130.00 | 70.00 |

|    |   |   |   |   |        |       |        |       |
|----|---|---|---|---|--------|-------|--------|-------|
| 69 | 否 | 否 | 是 | 女 | 102.00 | 68.00 | 105.00 | 70.00 |
| 86 | 否 | 是 | 是 | 女 | 120.00 | 70.00 | 126.00 | 76.00 |
| 71 | 是 | 否 | 是 | 女 | 155.00 | 89.00 | 160.00 | 93.00 |
| 71 | 否 | 否 | 是 | 女 | 117.00 | 47.00 | 98.00  | 46.00 |
| 73 | 是 | 否 | 是 | 女 | 136.00 | 86.00 | 138.00 | 90.00 |
| 84 | 是 | 否 | 是 | 女 | 138.00 | 90.00 | 160.00 | 90.00 |
| 71 | 是 | 否 | 是 | 女 | 120.00 | 78.00 | 124.00 | 80.00 |
| 70 | 是 | 否 | 是 | 女 | 145.00 | 89.00 | 140.00 | 85.00 |
| 80 | 是 | 是 | 是 | 女 | 140.00 | 78.00 | 144.00 | 80.00 |
| 66 | 否 | 否 | 是 | 女 | 150.00 | 80.00 | 150.00 | 90.00 |
| 74 | 是 | 是 | 是 | 女 | 148.00 | 80.00 | 148.00 | 86.00 |
| 67 | 是 | 是 | 是 | 女 | 139.00 | 89.00 | 138.00 | 87.00 |
| 69 | 是 | 否 | 是 | 女 | 140.00 | 90.00 | 150.00 | 90.00 |
| 87 | 否 | 否 | 是 | 女 | 124.00 | 70.00 | 126.00 | 78.00 |
| 76 | 是 | 否 | 是 | 女 | 145.00 | 80.00 | 150.00 | 83.00 |
| 70 | 是 | 否 | 是 | 女 | 134.00 | 74.00 | 136.00 | 74.00 |
| 80 | 否 | 是 | 是 | 女 | 140.00 | 60.00 | 148.00 | 62.00 |
| 68 | 是 | 否 | 是 | 女 | 140.00 | 80.00 | 145.00 | 80.00 |
| 70 | 是 | 是 | 是 | 女 | 120.00 | 60.00 | 118.00 | 70.00 |
| 87 | 是 | 是 | 是 | 女 | 120.00 | 70.00 | 122.00 | 74.00 |
| 87 | 是 | 否 | 是 | 女 | 140.00 | 70.00 | 142.00 | 70.00 |
| 85 | 是 | 否 | 是 | 女 | 138.00 | 79.00 | 140.00 | 80.00 |
| 84 | 是 | 是 | 是 | 女 | 124.00 | 64.00 | 126.00 | 68.00 |
| 87 | 是 | 否 | 是 | 女 | 142.00 | 80.00 | 146.00 | 80.00 |
| 74 | 否 | 否 | 是 | 女 | 136.00 | 88.00 | 140.00 | 88.00 |
| 67 | 否 | 是 | 是 | 女 | 120.00 | 70.00 | 122.00 | 74.00 |
| 69 | 否 | 否 | 是 | 女 | 130.00 | 70.00 | 135.00 | 72.00 |
| 69 | 是 | 否 | 是 | 女 | 130.00 | 72.00 | 134.00 | 76.00 |
| 71 | 是 | 否 | 是 | 女 | 120.00 | 78.00 | 118.00 | 80.00 |
| 71 | 是 | 否 | 是 | 女 | 139.00 | 81.00 | 148.00 | 80.00 |
| 69 | 是 | 否 | 是 | 女 | 130.00 | 72.00 | 135.00 | 75.00 |
| 86 | 是 | 否 | 是 | 女 | 146.00 | 72.00 | 148.00 | 77.00 |
| 67 | 是 | 否 | 是 | 女 | 110.00 | 80.00 | 111.00 | 80.00 |
| 76 | 是 | 否 | 是 | 女 | 125.00 | 67.00 | 128.00 | 70.00 |
| 76 | 否 | 否 | 是 | 女 | 138.00 | 83.00 | 130.00 | 80.00 |
| 77 | 否 | 否 | 是 | 女 | 130.00 | 80.00 | 135.00 | 87.00 |
| 70 | 否 | 否 | 是 | 女 | 130.00 | 80.00 | 132.00 | 82.00 |
| 74 | 是 | 否 | 是 | 女 | 120.00 | 70.00 | 128.00 | 70.00 |
| 69 | 否 | 是 | 是 | 女 | 130.00 | 80.00 | 138.00 | 80.00 |
| 88 | 否 | 否 | 是 | 女 | 138.00 | 72.00 | 136.00 | 74.00 |
| 72 | 否 | 否 | 是 | 女 | 116.00 | 82.00 | 133.00 | 84.00 |
| 78 | 否 | 否 | 是 | 女 | 90.00  | 64.00 | 94.00  | 60.00 |
| 69 | 否 | 否 | 是 | 女 | 110.00 | 70.00 | 116.00 | 74.00 |
| 67 | 否 | 否 | 是 | 女 | 154.00 | 87.00 | 146.00 | 76.00 |
| 90 | 是 | 否 | 是 | 女 | 160.00 | 89.00 | 159.00 | 86.00 |
| 68 | 否 | 是 | 是 | 女 | 120.00 | 78.00 | 124.00 | 80.00 |
| 77 | 是 | 否 | 是 | 女 | 135.00 | 76.00 | 138.00 | 80.00 |
| 81 | 是 | 否 | 是 | 女 | 140.00 | 86.00 | 130.00 | 88.00 |
| 85 | 否 | 否 | 是 | 女 | 140.00 | 85.00 | 150.00 | 89.00 |
| 72 | 是 | 否 | 是 | 女 | 152.00 | 94.00 | 150.00 | 92.00 |
| 69 | 否 | 否 | 是 | 女 | 110.00 | 68.00 | 112.00 | 70.00 |

|    |   |   |   |   |        |        |        |       |
|----|---|---|---|---|--------|--------|--------|-------|
| 69 | 否 | 否 | 是 | 女 | 148.00 | 80.00  | 150.00 | 80.00 |
| 86 | 是 | 否 | 是 | 女 | 120.00 | 70.00  | 115.00 | 70.00 |
| 71 | 是 | 是 | 是 | 女 | 138.00 | 88.00  | 145.00 | 85.00 |
| 74 | 否 | 否 | 是 | 女 | 139.00 | 88.00  | 135.00 | 80.00 |
| 77 | 是 | 否 | 是 | 女 | 139.00 | 86.00  | 135.00 | 82.00 |
| 76 | 是 | 否 | 是 | 女 | 140.00 | 70.00  | 148.00 | 70.00 |
| 67 | 否 | 否 | 是 | 女 | 138.00 | 76.00  | 139.00 | 80.00 |
| 90 | 是 | 是 | 是 | 女 | 120.00 | 60.00  | 124.00 | 62.00 |
| 68 | 是 | 否 | 是 | 女 | 139.00 | 90.00  | 140.00 | 85.00 |
| 70 | 是 | 是 | 是 | 女 | 101.00 | 69.00  | 106.00 | 70.00 |
| 76 | 是 | 否 | 是 | 女 | 140.00 | 95.00  | 141.00 | 93.00 |
| 68 | 否 | 否 | 是 | 女 | 112.00 | 66.00  | 112.00 | 68.00 |
| 70 | 是 | 是 | 是 | 女 | 136.00 | 70.00  | 136.00 | 70.00 |
| 67 | 是 | 否 | 是 | 女 | 130.00 | 80.00  | 138.00 | 82.00 |
| 76 | 是 | 是 | 是 | 女 | 180.00 | 88.00  | 165.00 | 86.00 |
| 76 | 是 | 否 | 是 | 女 | 158.00 | 78.00  | 160.00 | 80.00 |
| 67 | 否 | 否 | 是 | 女 | 134.00 | 80.00  | 130.00 | 82.00 |
| 85 | 是 | 否 | 是 | 女 | 140.00 | 86.00  | 145.00 | 88.00 |
| 80 | 是 | 否 | 是 | 女 | 135.00 | 82.00  | 138.00 | 86.00 |
| 71 | 否 | 否 | 是 | 女 | 130.00 | 80.00  | 139.00 | 90.00 |
| 66 | 否 | 否 | 是 | 女 | 139.00 | 69.00  | 142.00 | 72.00 |
| 73 | 否 | 否 | 是 | 女 | 108.00 | 76.00  | 110.00 | 78.00 |
| 71 | 是 | 否 | 是 | 女 | 150.00 | 80.00  | 156.00 | 82.00 |
| 70 | 是 | 是 | 是 | 女 | 124.00 | 78.00  | 124.00 | 76.00 |
| 69 | 否 | 是 | 是 | 女 | 144.00 | 80.00  | 140.00 | 78.00 |
| 75 | 否 | 否 | 是 | 女 | 136.00 | 88.00  | 140.00 | 88.00 |
| 69 | 是 | 否 | 是 | 女 | 136.00 | 92.00  | 139.00 | 94.00 |
| 73 | 否 | 否 | 是 | 女 | 130.00 | 100.00 | 130.00 | 90.00 |
| 97 | 是 | 否 | 是 | 女 | 146.00 | 70.00  | 150.00 | 70.00 |
| 78 | 是 | 否 | 是 | 女 | 138.00 | 82.00  | 130.00 | 70.00 |
| 72 | 否 | 否 | 是 | 女 | 151.00 | 76.00  | 140.00 | 89.00 |
| 66 | 是 | 否 | 是 | 女 | 137.00 | 88.00  | 136.00 | 84.00 |
| 67 | 是 | 否 | 是 | 女 | 126.00 | 80.00  | 130.00 | 80.00 |
| 72 | 否 | 否 | 是 | 女 | 138.00 | 85.00  | 140.00 | 92.00 |
| 76 | 是 | 否 | 是 | 女 | 154.00 | 90.00  | 160.00 | 90.00 |
| 69 | 是 | 否 | 是 | 女 | 108.00 | 73.00  | 118.00 | 70.00 |
| 89 | 是 | 否 | 是 | 女 | 135.00 | 65.00  | 138.00 | 69.00 |
| 69 | 是 | 否 | 是 | 女 | 158.00 | 78.00  | 161.00 | 81.00 |
| 67 | 否 | 否 | 是 | 女 | 110.00 | 72.00  | 113.00 | 75.00 |
| 73 | 是 | 否 | 是 | 女 | 138.00 | 89.00  | 138.00 | 87.00 |
| 73 | 是 | 是 | 是 | 女 | 110.00 | 80.00  | 116.00 | 78.00 |
| 68 | 否 | 否 | 是 | 女 | 160.00 | 87.00  | 162.00 | 89.00 |
| 75 | 是 | 否 | 是 | 女 | 134.00 | 93.00  | 143.00 | 99.00 |
| 71 | 是 | 是 | 是 | 女 | 160.00 | 90.00  | 160.00 | 95.00 |
| 68 | 是 | 否 | 是 | 女 | 138.00 | 71.00  | 139.00 | 82.00 |
| 87 | 否 | 否 | 是 | 女 | 110.00 | 80.00  | 100.00 | 70.00 |
| 67 | 否 | 否 | 是 | 女 | 138.00 | 82.00  | 132.00 | 87.00 |
| 81 | 是 | 否 | 是 | 女 | 140.00 | 82.00  | 140.00 | 80.00 |
| 74 | 是 | 是 | 是 | 女 | 138.00 | 87.00  | 142.00 | 88.00 |
| 69 | 是 | 否 | 是 | 女 | 128.00 | 80.00  | 130.00 | 82.00 |
| 74 | 是 | 是 | 是 | 女 | 130.00 | 70.00  | 136.00 | 76.00 |

|    |   |   |   |   |        |        |        |        |
|----|---|---|---|---|--------|--------|--------|--------|
| 70 | 是 | 否 | 是 | 女 | 140.00 | 70.00  | 148.00 | 70.00  |
| 89 | 是 | 是 | 是 | 女 | 117.00 | 92.00  | 120.00 | 89.00  |
| 70 | 否 | 否 | 是 | 女 | 138.00 | 71.00  | 135.00 | 80.00  |
| 72 | 是 | 是 | 是 | 女 | 139.00 | 82.00  | 139.00 | 85.00  |
| 74 | 是 | 是 | 是 | 女 | 140.00 | 83.00  | 146.00 | 84.00  |
| 68 | 否 | 否 | 是 | 女 | 140.00 | 90.00  | 150.00 | 90.00  |
| 71 | 否 | 否 | 是 | 女 | 125.00 | 77.00  | 121.00 | 90.00  |
| 66 | 是 | 是 | 是 | 女 | 157.00 | 100.00 | 151.00 | 88.00  |
| 75 | 否 | 否 | 是 | 女 | 118.00 | 70.00  | 120.00 | 78.00  |
| 83 | 是 | 否 | 是 | 女 | 148.00 | 100.00 | 131.00 | 93.00  |
| 70 | 否 | 是 | 是 | 女 | 120.00 | 80.00  | 120.00 | 90.00  |
| 80 | 是 | 否 | 是 | 女 | 135.00 | 89.00  | 130.00 | 80.00  |
| 66 | 否 | 否 | 是 | 女 | 122.00 | 79.00  | 120.00 | 80.00  |
| 66 | 否 | 否 | 是 | 女 | 90.00  | 60.00  | 90.00  | 60.00  |
| 74 | 是 | 否 | 是 | 女 | 108.00 | 65.00  | 110.00 | 70.00  |
| 69 | 否 | 否 | 是 | 女 | 142.00 | 98.00  | 140.00 | 95.00  |
| 86 | 是 | 否 | 是 | 女 | 130.00 | 76.00  | 138.00 | 78.00  |
| 71 | 否 | 否 | 是 | 女 | 150.00 | 90.00  | 140.00 | 85.00  |
| 68 | 否 | 否 | 是 | 女 | 128.00 | 77.00  | 120.00 | 78.00  |
| 76 | 是 | 是 | 是 | 女 | 191.00 | 98.00  | 207.00 | 100.00 |
| 81 | 是 | 是 | 是 | 女 | 130.00 | 75.00  | 136.00 | 77.00  |
| 66 | 是 | 否 | 是 | 女 | 130.00 | 78.00  | 146.00 | 88.00  |
| 71 | 是 | 否 | 是 | 女 | 134.00 | 78.00  | 130.00 | 72.00  |
| 71 | 是 | 否 | 是 | 女 | 139.00 | 69.00  | 156.00 | 82.00  |
| 66 | 是 | 否 | 是 | 女 | 172.00 | 90.00  | 178.00 | 90.00  |
| 69 | 否 | 否 | 是 | 女 | 145.00 | 90.00  | 140.00 | 85.00  |
| 71 | 是 | 否 | 是 | 女 | 134.00 | 80.00  | 140.00 | 80.00  |
| 79 | 是 | 否 | 是 | 女 | 141.00 | 84.00  | 128.00 | 81.00  |
| 73 | 是 | 是 | 是 | 女 | 145.00 | 90.00  | 154.00 | 92.00  |
| 66 | 否 | 否 | 是 | 女 | 126.00 | 64.00  | 130.00 | 70.00  |
| 74 | 否 | 否 | 是 | 女 | 120.00 | 70.00  | 124.00 | 77.00  |
| 80 | 是 | 否 | 是 | 女 | 129.00 | 66.00  | 131.00 | 69.00  |
| 72 | 是 | 是 | 是 | 女 | 130.00 | 70.00  | 122.00 | 72.00  |
| 66 | 否 | 否 | 是 | 女 | 136.00 | 88.00  | 140.00 | 88.00  |
| 73 | 否 | 否 | 是 | 女 | 114.00 | 68.00  | 118.00 | 68.00  |
| 82 | 是 | 否 | 是 | 女 | 165.00 | 91.00  | 168.00 | 99.00  |
| 66 | 否 | 否 | 是 | 女 | 112.00 | 78.00  | 120.00 | 80.00  |
| 80 | 是 | 否 | 是 | 女 | 144.00 | 80.00  | 146.00 | 82.00  |
| 72 | 是 | 否 | 是 | 女 | 115.00 | 75.00  | 118.00 | 70.00  |
| 71 | 是 | 否 | 是 | 女 | 135.00 | 75.00  | 139.00 | 79.00  |
| 77 | 否 | 否 | 是 | 女 | 120.00 | 80.00  | 132.00 | 82.00  |
| 67 | 否 | 否 | 是 | 女 | 160.00 | 83.00  | 161.00 | 85.00  |
| 67 | 是 | 否 | 是 | 女 | 110.00 | 68.00  | 114.00 | 70.00  |
| 74 | 是 | 否 | 是 | 女 | 138.00 | 88.00  | 140.00 | 88.00  |
| 67 | 是 | 否 | 是 | 女 | 141.00 | 89.00  | 128.00 | 82.00  |
| 69 | 是 | 是 | 是 | 女 | 135.00 | 82.00  | 139.00 | 84.00  |
| 74 | 是 | 否 | 是 | 女 | 122.00 | 68.00  | 122.00 | 69.00  |
| 77 | 是 | 否 | 是 | 女 | 149.00 | 69.00  | 158.00 | 78.00  |
| 74 | 否 | 否 | 是 | 女 | 150.00 | 82.00  | 152.00 | 90.00  |
| 78 | 是 | 是 | 是 | 女 | 128.00 | 69.00  | 126.00 | 66.00  |
| 73 | 是 | 否 | 是 | 女 | 140.00 | 84.00  | 142.00 | 88.00  |

|    |   |   |   |   |        |        |        |        |
|----|---|---|---|---|--------|--------|--------|--------|
| 71 | 是 | 否 | 是 | 女 | 130.00 | 70.00  | 135.00 | 70.00  |
| 69 | 是 | 是 | 是 | 女 | 118.00 | 66.00  | 120.00 | 70.00  |
| 85 | 是 | 否 | 是 | 女 | 126.00 | 80.00  | 130.00 | 81.00  |
| 69 | 否 | 否 | 是 | 女 | 130.00 | 78.00  | 136.00 | 90.00  |
| 80 | 否 | 否 | 是 | 女 | 120.00 | 80.00  | 118.00 | 72.00  |
| 91 | 是 | 是 | 是 | 女 | 159.00 | 100.00 | 143.00 | 89.00  |
| 71 | 是 | 否 | 是 | 女 | 130.00 | 81.00  | 113.00 | 74.00  |
| 67 | 否 | 是 | 是 | 女 | 130.00 | 72.00  | 138.00 | 80.00  |
| 68 | 否 | 否 | 是 | 女 | 105.00 | 70.00  | 100.00 | 65.00  |
| 68 | 否 | 否 | 是 | 女 | 122.00 | 72.00  | 124.00 | 74.00  |
| 75 | 否 | 否 | 是 | 女 | 130.00 | 80.00  | 125.00 | 75.00  |
| 74 | 否 | 否 | 是 | 女 | 120.00 | 90.00  | 138.00 | 98.00  |
| 69 | 否 | 否 | 是 | 女 | 113.00 | 72.00  | 115.00 | 64.00  |
| 71 | 否 | 否 | 是 | 女 | 122.00 | 78.00  | 125.00 | 80.00  |
| 73 | 是 | 否 | 是 | 女 | 130.00 | 80.00  | 128.00 | 76.00  |
| 70 | 是 | 否 | 是 | 女 | 150.00 | 80.00  | 154.00 | 87.00  |
| 79 | 否 | 否 | 是 | 女 | 139.00 | 81.00  | 138.00 | 88.00  |
| 73 | 是 | 是 | 是 | 女 | 133.00 | 89.00  | 138.00 | 89.00  |
| 72 | 是 | 否 | 是 | 女 | 130.00 | 80.00  | 130.00 | 86.00  |
| 74 | 是 | 是 | 是 | 女 | 133.00 | 82.00  | 132.00 | 80.00  |
| 77 | 否 | 否 | 是 | 女 | 216.00 | 95.00  | 207.00 | 93.00  |
| 66 | 否 | 否 | 是 | 女 | 116.00 | 75.00  | 120.00 | 76.00  |
| 68 | 是 | 否 | 是 | 女 | 120.00 | 76.00  | 118.00 | 70.00  |
| 83 | 否 | 否 | 是 | 女 | 180.00 | 100.00 | 182.00 | 106.00 |
| 73 | 否 | 否 | 是 | 女 | 125.00 | 73.00  | 120.00 | 70.00  |
| 93 | 否 | 是 | 是 | 女 | 128.00 | 70.00  | 136.00 | 78.00  |
| 81 | 是 | 是 | 是 | 女 | 129.00 | 67.00  | 129.00 | 68.00  |
| 77 | 是 | 否 | 是 | 女 | 140.00 | 60.00  | 138.00 | 66.00  |
| 73 | 否 | 否 | 是 | 女 | 124.00 | 70.00  | 120.00 | 67.00  |
| 71 | 是 | 否 | 是 | 女 | 136.00 | 90.00  | 138.00 | 90.00  |
| 82 | 是 | 否 | 是 | 女 | 130.00 | 85.00  | 132.00 | 89.00  |
| 93 | 是 | 否 | 是 | 女 | 179.00 | 71.00  | 186.00 | 76.00  |
| 88 | 否 | 否 | 是 | 女 | 136.00 | 80.00  | 139.00 | 84.00  |
| 69 | 是 | 否 | 是 | 女 | 128.00 | 72.00  | 96.00  | 75.00  |
| 74 | 否 | 否 | 是 | 女 | 145.00 | 85.00  | 150.00 | 90.00  |
| 68 | 否 | 否 | 是 | 女 | 110.00 | 70.00  | 108.00 | 69.00  |
| 67 | 是 | 否 | 是 | 女 | 132.00 | 92.00  | 130.00 | 90.00  |
| 72 | 是 | 否 | 是 | 女 | 129.00 | 77.00  | 130.00 | 80.00  |
| 72 | 否 | 否 | 是 | 女 | 138.00 | 80.00  | 140.00 | 86.00  |
| 80 | 是 | 否 | 是 | 女 | 96.00  | 62.00  | 98.00  | 64.00  |
| 68 | 否 | 否 | 是 | 女 | 139.00 | 70.00  | 135.00 | 65.00  |
| 74 | 否 | 否 | 是 | 女 | 142.00 | 60.00  | 138.00 | 65.00  |
| 81 | 是 | 否 | 是 | 女 | 138.00 | 78.00  | 142.00 | 80.00  |
| 82 | 否 | 否 | 是 | 女 | 134.00 | 78.00  | 138.00 | 82.00  |
| 70 | 否 | 是 | 是 | 女 | 132.00 | 85.00  | 130.00 | 80.00  |
| 68 | 是 | 是 | 是 | 女 | 170.00 | 100.00 | 180.00 | 102.00 |
| 72 | 否 | 否 | 是 | 女 | 135.00 | 82.00  | 138.00 | 85.00  |
| 84 | 是 | 否 | 是 | 女 | 140.00 | 89.00  | 139.00 | 79.00  |
| 80 | 是 | 否 | 是 | 女 | 150.00 | 95.00  | 147.00 | 100.00 |
| 85 | 是 | 否 | 是 | 女 | 151.00 | 87.00  | 145.00 | 90.00  |
| 68 | 否 | 否 | 是 | 女 | 120.00 | 70.00  | 118.00 | 75.00  |

|    |   |   |   |   |        |        |        |        |
|----|---|---|---|---|--------|--------|--------|--------|
| 69 | 是 | 是 | 是 | 女 | 150.00 | 80.00  | 158.00 | 82.00  |
| 70 | 否 | 否 | 是 | 女 | 150.00 | 88.00  | 152.00 | 90.00  |
| 89 | 是 | 否 | 是 | 女 | 145.00 | 78.00  | 138.00 | 76.00  |
| 81 | 否 | 否 | 是 | 女 | 164.00 | 89.00  | 175.00 | 89.00  |
| 68 | 否 | 否 | 是 | 女 | 130.00 | 70.00  | 138.00 | 76.00  |
| 73 | 是 | 否 | 是 | 女 | 110.00 | 70.00  | 118.00 | 70.00  |
| 94 | 否 | 否 | 是 | 女 | 124.00 | 60.00  | 129.00 | 62.00  |
| 82 | 否 | 否 | 是 | 女 | 135.00 | 72.00  | 138.00 | 75.00  |
| 74 | 否 | 否 | 是 | 女 | 107.00 | 68.00  | 106.00 | 65.00  |
| 73 | 是 | 否 | 是 | 女 | 130.00 | 80.00  | 131.00 | 76.00  |
| 92 | 是 | 否 | 是 | 女 | 100.00 | 70.00  | 110.00 | 70.00  |
| 82 | 否 | 否 | 是 | 女 | 120.00 | 70.00  | 140.00 | 80.00  |
| 81 | 否 | 否 | 是 | 女 | 120.00 | 62.00  | 122.00 | 64.00  |
| 67 | 是 | 否 | 是 | 女 | 138.00 | 80.00  | 132.00 | 78.00  |
| 67 | 否 | 否 | 是 | 女 | 112.00 | 68.00  | 116.00 | 72.00  |
| 68 | 是 | 否 | 是 | 女 | 168.00 | 104.00 | 164.00 | 100.00 |
| 92 | 是 | 否 | 是 | 女 | 206.00 | 98.00  | 200.00 | 90.00  |
| 98 | 是 | 否 | 是 | 女 | 154.00 | 83.00  | 150.00 | 85.00  |
| 79 | 是 | 是 | 是 | 女 | 139.00 | 88.00  | 135.00 | 78.00  |
| 74 | 是 | 否 | 是 | 女 | 118.00 | 74.00  | 120.00 | 76.00  |
| 80 | 是 | 否 | 是 | 女 | 140.00 | 75.00  | 135.00 | 75.00  |
| 71 | 是 | 否 | 是 | 女 | 180.00 | 110.00 | 185.00 | 110.00 |
| 75 | 是 | 是 | 是 | 女 | 110.00 | 75.00  | 105.00 | 70.00  |
| 71 | 否 | 否 | 是 | 女 | 150.00 | 84.00  | 146.00 | 76.00  |
| 66 | 否 | 否 | 是 | 女 | 110.00 | 70.00  | 115.00 | 76.00  |
| 80 | 是 | 否 | 是 | 女 | 180.00 | 90.00  | 175.00 | 90.00  |
| 80 | 是 | 否 | 是 | 女 | 130.00 | 60.00  | 128.00 | 65.00  |
| 68 | 否 | 否 | 是 | 女 | 120.00 | 81.00  | 124.00 | 81.00  |
| 87 | 是 | 否 | 是 | 女 | 135.00 | 81.00  | 138.00 | 84.00  |
| 77 | 是 | 是 | 是 | 女 | 155.00 | 79.00  | 158.00 | 82.00  |
| 73 | 是 | 否 | 是 | 女 | 134.00 | 82.00  | 138.00 | 86.00  |
| 88 | 是 | 否 | 是 | 女 | 149.00 | 89.00  | 142.00 | 78.00  |
| 75 | 否 | 是 | 是 | 女 | 164.00 | 84.00  | 170.00 | 92.00  |
| 73 | 是 | 否 | 是 | 女 | 120.00 | 60.00  | 118.00 | 68.00  |
| 79 | 是 | 否 | 是 | 女 | 120.00 | 70.00  | 122.00 | 70.00  |
| 68 | 否 | 否 | 是 | 女 | 120.00 | 78.00  | 127.00 | 76.00  |
| 85 | 是 | 否 | 是 | 女 | 143.00 | 83.00  | 145.00 | 86.00  |
| 79 | 是 | 否 | 是 | 女 | 120.00 | 80.00  | 130.00 | 86.00  |
| 68 | 否 | 否 | 是 | 女 | 134.00 | 90.00  | 130.00 | 85.00  |
| 76 | 是 | 否 | 是 | 女 | 130.00 | 76.00  | 132.00 | 76.00  |
| 66 | 否 | 否 | 是 | 女 | 158.00 | 90.00  | 150.00 | 90.00  |
| 84 | 否 | 否 | 是 | 女 | 138.00 | 100.00 | 139.00 | 99.00  |
| 80 | 是 | 否 | 是 | 女 | 148.00 | 82.00  | 145.00 | 80.00  |
| 67 | 是 | 是 | 是 | 女 | 150.00 | 80.00  | 150.00 | 83.00  |
| 74 | 否 | 否 | 是 | 女 | 118.00 | 68.00  | 120.00 | 70.00  |
| 78 | 否 | 否 | 是 | 女 | 134.00 | 72.00  | 139.00 | 78.00  |
| 67 | 否 | 否 | 是 | 女 | 150.00 | 90.00  | 153.00 | 95.00  |
| 72 | 是 | 否 | 是 | 女 | 139.00 | 70.00  | 134.00 | 65.00  |
| 75 | 是 | 否 | 是 | 女 | 120.00 | 68.00  | 130.00 | 78.00  |
| 69 | 是 | 否 | 是 | 女 | 145.00 | 78.00  | 148.00 | 82.00  |
| 69 | 否 | 否 | 是 | 女 | 94.00  | 60.00  | 98.00  | 60.00  |

|    |   |   |   |   |        |        |        |        |
|----|---|---|---|---|--------|--------|--------|--------|
| 80 | 是 | 否 | 是 | 女 | 128.00 | 70.00  | 130.00 | 80.00  |
| 69 | 是 | 否 | 是 | 女 | 146.00 | 82.00  | 148.00 | 88.00  |
| 81 | 否 | 否 | 是 | 女 | 139.00 | 80.00  | 135.00 | 82.00  |
| 69 | 是 | 否 | 是 | 女 | 146.00 | 76.00  | 150.00 | 80.00  |
| 70 | 是 | 否 | 是 | 女 | 156.00 | 96.00  | 158.00 | 100.00 |
| 67 | 否 | 否 | 是 | 女 | 168.00 | 96.00  | 155.00 | 86.00  |
| 75 | 是 | 否 | 是 | 女 | 160.00 | 90.00  | 150.00 | 80.00  |
| 68 | 否 | 否 | 是 | 女 | 135.00 | 82.00  | 139.00 | 84.00  |
| 78 | 是 | 否 | 是 | 女 | 120.00 | 80.00  | 132.00 | 81.00  |
| 83 | 是 | 否 | 是 | 女 | 126.00 | 60.00  | 128.00 | 60.00  |
| 89 | 是 | 否 | 是 | 女 | 102.00 | 72.00  | 100.00 | 74.00  |
| 71 | 否 | 否 | 是 | 女 | 129.00 | 77.00  | 132.00 | 80.00  |
| 75 | 是 | 否 | 是 | 女 | 110.00 | 62.00  | 112.00 | 60.00  |
| 74 | 是 | 是 | 是 | 女 | 136.00 | 83.00  | 144.00 | 86.00  |
| 81 | 是 | 否 | 是 | 女 | 128.00 | 70.00  | 132.00 | 74.00  |
| 70 | 否 | 否 | 是 | 女 | 138.00 | 88.00  | 140.00 | 88.00  |
| 87 | 否 | 是 | 是 | 女 | 130.00 | 76.00  | 130.00 | 80.00  |
| 72 | 是 | 否 | 是 | 女 | 140.00 | 82.00  | 150.00 | 96.00  |
| 77 | 否 | 否 | 是 | 女 | 110.00 | 60.00  | 112.00 | 65.00  |
| 73 | 否 | 否 | 是 | 女 | 136.00 | 82.00  | 139.00 | 84.00  |
| 78 | 否 | 否 | 是 | 女 | 138.00 | 64.00  | 138.00 | 64.00  |
| 72 | 是 | 否 | 是 | 女 | 122.00 | 68.00  | 124.00 | 69.00  |
| 72 | 是 | 否 | 是 | 女 | 154.00 | 90.00  | 148.00 | 96.00  |
| 85 | 是 | 是 | 是 | 女 | 165.00 | 74.00  | 159.00 | 89.00  |
| 86 | 是 | 否 | 是 | 女 | 128.00 | 67.00  | 130.00 | 70.00  |
| 74 | 是 | 否 | 是 | 女 | 124.00 | 78.00  | 128.00 | 80.00  |
| 74 | 否 | 否 | 是 | 女 | 128.00 | 78.00  | 128.00 | 76.00  |
| 71 | 否 | 否 | 是 | 女 | 150.00 | 90.00  | 145.00 | 85.00  |
| 70 | 是 | 否 | 是 | 女 | 135.00 | 74.00  | 138.00 | 76.00  |
| 66 | 否 | 否 | 是 | 女 | 120.00 | 70.00  | 125.00 | 75.00  |
| 74 | 是 | 否 | 是 | 女 | 124.00 | 64.00  | 126.00 | 68.00  |
| 66 | 是 | 否 | 是 | 女 | 148.00 | 92.00  | 153.00 | 95.00  |
| 85 | 否 | 否 | 是 | 女 | 120.00 | 62.00  | 122.00 | 62.00  |
| 72 | 是 | 否 | 是 | 女 | 110.00 | 70.00  | 108.00 | 68.00  |
| 84 | 是 | 否 | 是 | 女 | 170.00 | 100.00 | 180.00 | 110.00 |
| 85 | 是 | 否 | 是 | 女 | 135.00 | 80.00  | 137.00 | 83.00  |
| 66 | 是 | 否 | 是 | 女 | 140.00 | 100.00 | 135.00 | 100.00 |
| 95 | 否 | 否 | 是 | 女 | 146.00 | 90.00  | 140.00 | 87.00  |
| 82 | 是 | 否 | 是 | 女 | 130.00 | 81.00  | 132.00 | 79.00  |
| 69 | 否 | 否 | 是 | 女 | 136.00 | 86.00  | 138.00 | 84.00  |
| 74 | 是 | 否 | 是 | 女 | 155.00 | 78.00  | 156.00 | 85.00  |
| 69 | 否 | 否 | 是 | 女 | 135.00 | 68.00  | 139.00 | 72.00  |
| 88 | 是 | 是 | 是 | 女 | 122.00 | 86.00  | 120.00 | 84.00  |
| 76 | 否 | 否 | 是 | 女 | 130.00 | 68.00  | 139.00 | 74.00  |
| 76 | 否 | 是 | 是 | 女 | 118.00 | 70.00  | 122.00 | 76.00  |
| 71 | 否 | 否 | 是 | 女 | 150.00 | 80.00  | 154.00 | 88.00  |
| 77 | 否 | 否 | 是 | 女 | 142.00 | 80.00  | 140.00 | 80.00  |
| 92 | 是 | 是 | 是 | 女 | 147.00 | 92.00  | 148.00 | 89.00  |
| 67 | 是 | 否 | 是 | 女 | 140.00 | 70.00  | 160.00 | 70.00  |
| 66 | 是 | 否 | 是 | 女 | 118.00 | 70.00  | 120.00 | 75.00  |
| 79 | 否 | 否 | 是 | 女 | 170.00 | 90.00  | 178.00 | 90.00  |

|    |   |   |   |   |        |        |        |        |
|----|---|---|---|---|--------|--------|--------|--------|
| 75 | 是 | 否 | 是 | 女 | 158.00 | 100.00 | 160.00 | 100.00 |
| 71 | 是 | 否 | 是 | 女 | 160.00 | 100.00 | 170.00 | 95.00  |
| 67 | 是 | 否 | 是 | 女 | 147.00 | 82.00  | 157.00 | 73.00  |
| 79 | 否 | 否 | 是 | 女 | 138.00 | 70.00  | 140.00 | 70.00  |
| 86 | 否 | 否 | 是 | 女 | 130.00 | 70.00  | 135.00 | 80.00  |
| 92 | 是 | 否 | 是 | 女 | 186.00 | 92.00  | 194.00 | 85.00  |
| 71 | 是 | 是 | 是 | 女 | 146.00 | 76.00  | 148.00 | 80.00  |
| 88 | 是 | 否 | 是 | 女 | 120.00 | 64.00  | 124.00 | 69.00  |
| 69 | 否 | 否 | 是 | 女 | 125.00 | 75.00  | 130.00 | 80.00  |
| 74 | 是 | 否 | 是 | 女 | 122.00 | 68.00  | 126.00 | 72.00  |
| 92 | 是 | 否 | 是 | 女 | 155.00 | 87.00  | 158.00 | 90.00  |
| 70 | 是 | 否 | 是 | 女 | 126.00 | 80.00  | 128.00 | 80.00  |
| 75 | 否 | 否 | 是 | 女 | 118.00 | 64.00  | 120.00 | 70.00  |
| 75 | 否 | 否 | 是 | 女 | 127.00 | 67.00  | 139.00 | 70.00  |
| 73 | 是 | 否 | 是 | 女 | 139.00 | 89.00  | 140.00 | 87.00  |
| 67 | 是 | 否 | 是 | 女 | 135.00 | 89.00  | 130.00 | 84.00  |
| 84 | 否 | 否 | 是 | 女 | 110.00 | 70.00  | 105.00 | 65.00  |
| 92 | 否 | 否 | 是 | 女 | 138.00 | 74.00  | 139.00 | 72.00  |
| 71 | 是 | 否 | 是 | 女 | 115.00 | 78.00  | 125.00 | 80.00  |
| 70 | 否 | 否 | 是 | 女 | 138.00 | 68.00  | 140.00 | 70.00  |
| 84 | 否 | 是 | 是 | 女 | 112.00 | 73.00  | 115.00 | 75.00  |
| 66 | 是 | 否 | 是 | 女 | 130.00 | 80.00  | 136.00 | 82.00  |
| 72 | 否 | 否 | 是 | 女 | 122.00 | 68.00  | 120.00 | 68.00  |
| 66 | 否 | 否 | 是 | 女 | 142.00 | 75.00  | 148.00 | 76.00  |
| 73 | 是 | 否 | 是 | 女 | 130.00 | 80.00  | 148.00 | 89.00  |
| 75 | 否 | 否 | 是 | 女 | 142.00 | 80.00  | 140.00 | 80.00  |
| 75 | 否 | 否 | 是 | 女 | 120.00 | 66.00  | 118.00 | 70.00  |
| 73 | 是 | 否 | 是 | 女 | 162.00 | 90.00  | 160.00 | 94.00  |
| 71 | 是 | 否 | 是 | 女 | 170.00 | 90.00  | 168.00 | 88.00  |
| 81 | 是 | 否 | 是 | 女 | 136.00 | 82.00  | 138.00 | 84.00  |
| 73 | 否 | 否 | 是 | 女 | 146.00 | 95.00  | 142.00 | 84.00  |
| 67 | 否 | 否 | 是 | 女 | 136.00 | 80.00  | 138.00 | 80.00  |
| 66 | 否 | 否 | 是 | 女 | 115.00 | 78.00  | 120.00 | 80.00  |
| 77 | 是 | 否 | 是 | 女 | 140.00 | 80.00  | 142.00 | 82.00  |
| 69 | 否 | 否 | 是 | 女 | 132.00 | 81.00  | 135.00 | 84.00  |
| 68 | 否 | 否 | 是 | 女 | 110.00 | 80.00  | 112.00 | 78.00  |
| 76 | 否 | 否 | 是 | 女 | 122.00 | 82.00  | 120.00 | 80.00  |
| 83 | 是 | 否 | 是 | 女 | 140.00 | 90.00  | 170.00 | 82.00  |
| 71 | 是 | 否 | 是 | 女 | 130.00 | 80.00  | 130.00 | 85.00  |
| 82 | 否 | 否 | 是 | 女 | 135.00 | 75.00  | 140.00 | 88.00  |
| 66 | 否 | 否 | 是 | 女 | 125.00 | 60.00  | 122.00 | 65.00  |
| 68 | 否 | 否 | 是 | 女 | 100.00 | 70.00  | 102.00 | 71.00  |
| 67 | 是 | 否 | 是 | 女 | 150.00 | 91.00  | 151.00 | 92.00  |
| 76 | 否 | 否 | 是 | 女 | 139.00 | 70.00  | 135.00 | 72.00  |
| 80 | 是 | 是 | 是 | 女 | 136.00 | 86.00  | 130.00 | 80.00  |
| 67 | 否 | 否 | 是 | 女 | 147.00 | 63.00  | 140.00 | 88.00  |
| 70 | 是 | 否 | 是 | 女 | 122.00 | 70.00  | 126.00 | 72.00  |
| 68 | 否 | 否 | 是 | 女 | 170.00 | 102.00 | 172.00 | 104.00 |
| 76 | 是 | 是 | 是 | 女 | 138.00 | 89.00  | 137.00 | 88.00  |
| 74 | 是 | 否 | 是 | 女 | 113.00 | 70.00  | 116.00 | 72.00  |
| 76 | 是 | 否 | 是 | 女 | 130.00 | 77.00  | 140.00 | 78.00  |

|    |   |   |   |   |        |        |        |        |
|----|---|---|---|---|--------|--------|--------|--------|
| 72 | 否 | 否 | 是 | 女 | 118.00 | 76.00  | 120.00 | 80.00  |
| 73 | 否 | 否 | 是 | 女 | 120.00 | 77.00  | 135.00 | 81.00  |
| 86 | 否 | 否 | 是 | 女 | 155.00 | 91.00  | 160.00 | 94.00  |
| 67 | 是 | 否 | 是 | 女 | 148.00 | 82.00  | 151.00 | 84.00  |
| 72 | 否 | 否 | 是 | 女 | 110.00 | 76.00  | 110.00 | 72.00  |
| 67 | 否 | 否 | 是 | 女 | 140.00 | 80.00  | 135.00 | 85.00  |
| 71 | 是 | 是 | 是 | 女 | 180.00 | 70.00  | 190.00 | 80.00  |
| 76 | 是 | 否 | 是 | 女 | 148.00 | 74.00  | 146.00 | 70.00  |
| 70 | 是 | 否 | 是 | 女 | 135.00 | 71.00  | 138.00 | 80.00  |
| 68 | 是 | 否 | 是 | 女 | 170.00 | 90.00  | 168.00 | 88.00  |
| 71 | 是 | 否 | 是 | 女 | 156.00 | 96.00  | 160.00 | 98.00  |
| 66 | 否 | 否 | 是 | 女 | 140.00 | 88.00  | 142.00 | 90.00  |
| 68 | 是 | 否 | 是 | 女 | 160.00 | 80.00  | 164.00 | 88.00  |
| 71 | 是 | 否 | 是 | 女 | 128.00 | 75.00  | 125.00 | 72.00  |
| 69 | 是 | 否 | 是 | 女 | 160.00 | 72.00  | 164.00 | 76.00  |
| 77 | 是 | 否 | 是 | 女 | 125.00 | 71.00  | 128.00 | 74.00  |
| 79 | 是 | 否 | 是 | 女 | 128.00 | 76.00  | 132.00 | 80.00  |
| 69 | 否 | 否 | 是 | 女 | 136.00 | 84.00  | 138.00 | 86.00  |
| 67 | 否 | 否 | 是 | 女 | 142.00 | 80.00  | 146.00 | 80.00  |
| 67 | 是 | 否 | 是 | 女 | 139.00 | 89.00  | 135.00 | 85.00  |
| 66 | 是 | 是 | 是 | 女 | 150.00 | 80.00  | 150.00 | 90.00  |
| 77 | 否 | 是 | 是 | 女 | 126.00 | 72.00  | 132.00 | 70.00  |
| 89 | 是 | 是 | 是 | 女 | 147.00 | 78.00  | 137.00 | 78.00  |
| 68 | 否 | 否 | 是 | 女 | 135.00 | 80.00  | 130.00 | 80.00  |
| 72 | 是 | 否 | 是 | 女 | 120.00 | 76.00  | 120.00 | 80.00  |
| 71 | 是 | 否 | 是 | 女 | 131.00 | 69.00  | 133.00 | 80.00  |
| 69 | 是 | 是 | 是 | 女 | 130.00 | 81.00  | 128.00 | 78.00  |
| 72 | 是 | 是 | 是 | 女 | 127.00 | 85.00  | 125.00 | 80.00  |
| 67 | 是 | 否 | 是 | 女 | 130.00 | 88.00  | 132.00 | 90.00  |
| 71 | 是 | 否 | 是 | 女 | 153.00 | 80.00  | 151.00 | 82.00  |
| 71 | 否 | 否 | 是 | 女 | 120.00 | 66.00  | 120.00 | 70.00  |
| 69 | 是 | 是 | 是 | 女 | 145.00 | 75.00  | 140.00 | 70.00  |
| 85 | 否 | 否 | 是 | 女 | 162.00 | 80.00  | 164.00 | 82.00  |
| 81 | 否 | 否 | 是 | 女 | 180.00 | 100.00 | 175.00 | 100.00 |
| 78 | 是 | 否 | 是 | 女 | 110.00 | 70.00  | 120.00 | 80.00  |
| 69 | 否 | 否 | 是 | 女 | 160.00 | 96.00  | 168.00 | 98.00  |
| 80 | 是 | 是 | 是 | 女 | 138.00 | 80.00  | 140.00 | 80.00  |
| 72 | 否 | 否 | 是 | 女 | 130.00 | 70.00  | 125.00 | 65.00  |
| 75 | 是 | 否 | 是 | 女 | 142.00 | 70.00  | 144.00 | 71.00  |
| 94 | 是 | 否 | 是 | 女 | 130.00 | 62.00  | 132.00 | 64.00  |
| 81 | 是 | 否 | 是 | 女 | 139.00 | 89.00  | 138.00 | 88.00  |
| 71 | 否 | 是 | 是 | 女 | 110.00 | 70.00  | 105.00 | 65.00  |
| 66 | 是 | 否 | 是 | 女 | 135.00 | 80.00  | 130.00 | 75.00  |
| 69 | 否 | 否 | 是 | 女 | 122.00 | 64.00  | 116.00 | 75.00  |
| 76 | 是 | 否 | 是 | 女 | 135.00 | 85.00  | 138.00 | 88.00  |
| 68 | 是 | 是 | 是 | 女 | 150.00 | 80.00  | 140.00 | 80.00  |
| 81 | 是 | 是 | 是 | 女 | 109.00 | 60.00  | 110.00 | 70.00  |
| 73 | 否 | 否 | 是 | 女 | 135.00 | 85.00  | 138.00 | 88.00  |
| 80 | 是 | 否 | 是 | 女 | 160.00 | 90.00  | 165.00 | 85.00  |
| 70 | 否 | 否 | 是 | 女 | 130.00 | 76.00  | 134.00 | 82.00  |
| 68 | 是 | 否 | 是 | 女 | 150.00 | 90.00  | 145.00 | 93.00  |

|    |    |   |   |   |        |        |        |        |
|----|----|---|---|---|--------|--------|--------|--------|
| 76 | 是  | 否 | 是 | 女 | 110.00 | 60.00  | 120.00 | 60.00  |
| 69 | 是否 | 否 | 是 | 女 | 140.00 | 70.00  | 142.00 | 70.00  |
| 78 | 否  | 否 | 是 | 女 | 125.00 | 70.00  | 130.00 | 70.00  |
| 74 | 是  | 否 | 是 | 女 | 139.00 | 78.00  | 140.00 | 87.00  |
| 88 | 是  | 否 | 是 | 女 | 130.00 | 60.00  | 126.00 | 62.00  |
| 86 | 是  | 是 | 是 | 女 | 140.00 | 70.00  | 133.00 | 68.00  |
| 66 | 是  | 否 | 否 | 女 | 139.00 | 76.00  | 130.00 | 85.00  |
| 72 | 是  | 否 | 是 | 女 | 174.00 | 90.00  | 170.00 | 90.00  |
| 80 | 是  | 否 | 是 | 女 | 152.00 | 78.00  | 158.00 | 81.00  |
| 71 | 是  | 是 | 是 | 女 | 138.00 | 88.00  | 140.00 | 89.00  |
| 73 | 否  | 否 | 是 | 女 | 128.00 | 79.00  | 130.00 | 80.00  |
| 76 | 否  | 否 | 是 | 女 | 118.00 | 69.00  | 118.00 | 64.00  |
| 75 | 是  | 否 | 是 | 女 | 120.00 | 80.00  | 135.00 | 80.00  |
| 68 | 否  | 否 | 是 | 女 | 133.00 | 78.00  | 130.00 | 80.00  |
| 70 | 是  | 是 | 是 | 女 | 168.00 | 88.00  | 170.00 | 90.00  |
| 74 | 是  | 否 | 是 | 女 | 130.00 | 73.00  | 138.00 | 76.00  |
| 92 | 否  | 否 | 是 | 女 | 138.00 | 70.00  | 139.00 | 76.00  |
| 82 | 否  | 否 | 是 | 女 | 148.00 | 80.00  | 158.00 | 90.00  |
| 66 | 是  | 否 | 是 | 女 | 124.00 | 70.00  | 130.00 | 72.00  |
| 73 | 是  | 否 | 是 | 女 | 130.00 | 80.00  | 130.00 | 85.00  |
| 72 | 是  | 否 | 是 | 女 | 142.00 | 82.00  | 142.00 | 84.00  |
| 68 | 否  | 否 | 是 | 女 | 128.00 | 74.00  | 126.00 | 70.00  |
| 66 | 否  | 否 | 是 | 女 | 122.00 | 80.00  | 114.00 | 76.00  |
| 80 | 是  | 否 | 是 | 女 | 120.00 | 72.00  | 122.00 | 75.00  |
| 71 | 是  | 是 | 是 | 女 | 120.00 | 72.00  | 126.00 | 79.00  |
| 73 | 是  | 否 | 是 | 女 | 134.00 | 80.00  | 138.00 | 80.00  |
| 67 | 否  | 否 | 是 | 女 | 139.00 | 70.00  | 136.00 | 76.00  |
| 81 | 是  | 否 | 是 | 女 | 124.00 | 72.00  | 130.00 | 80.00  |
| 69 | 否  | 否 | 是 | 女 | 190.00 | 116.00 | 194.00 | 114.00 |
| 72 | 是  | 否 | 是 | 女 | 140.00 | 80.00  | 146.00 | 82.00  |
| 70 | 是  | 否 | 是 | 女 | 156.00 | 80.00  | 152.00 | 80.00  |
| 67 | 是  | 否 | 是 | 女 | 135.00 | 80.00  | 130.00 | 80.00  |
| 68 | 否  | 否 | 是 | 女 | 144.00 | 82.00  | 152.00 | 87.00  |
| 76 | 是  | 否 | 是 | 女 | 135.00 | 80.00  | 139.00 | 82.00  |
| 68 | 否  | 否 | 是 | 女 | 110.00 | 70.00  | 105.00 | 65.00  |
| 84 | 否  | 否 | 是 | 女 | 130.00 | 67.00  | 138.00 | 70.00  |
| 71 | 是  | 否 | 是 | 女 | 139.00 | 77.00  | 140.00 | 72.00  |
| 74 | 否  | 否 | 是 | 女 | 139.00 | 77.00  | 123.00 | 80.00  |
| 74 | 是  | 是 | 是 | 女 | 131.00 | 76.00  | 135.00 | 80.00  |
| 89 | 是  | 否 | 是 | 女 | 141.00 | 95.00  | 149.00 | 83.00  |
| 89 | 是  | 否 | 是 | 女 | 142.00 | 76.00  | 131.00 | 82.00  |
| 70 | 否  | 否 | 是 | 女 | 139.00 | 80.00  | 140.00 | 79.00  |
| 71 | 否  | 否 | 是 | 女 | 139.00 | 82.00  | 134.00 | 84.00  |
| 76 | 否  | 否 | 是 | 女 | 119.00 | 60.00  | 120.00 | 60.00  |
| 77 | 否  | 否 | 是 | 女 | 92.00  | 60.00  | 90.00  | 60.00  |
| 66 | 是  | 否 | 是 | 女 | 130.00 | 72.00  | 128.00 | 70.00  |
| 73 | 是  | 否 | 是 | 女 | 155.00 | 100.00 | 160.00 | 100.00 |
| 81 | 是  | 否 | 是 | 女 | 110.00 | 70.00  | 112.00 | 70.00  |
| 70 | 是  | 否 | 是 | 女 | 200.00 | 100.00 | 200.00 | 106.00 |
| 74 | 否  | 否 | 是 | 女 | 136.00 | 71.00  | 138.00 | 70.00  |
| 74 | 是  | 否 | 是 | 女 | 126.00 | 80.00  | 130.00 | 80.00  |

|    |   |   |   |   |        |        |        |        |
|----|---|---|---|---|--------|--------|--------|--------|
| 72 | 是 | 否 | 是 | 女 | 178.00 | 100.00 | 180.00 | 108.00 |
| 72 | 是 | 否 | 是 | 女 | 139.00 | 79.00  | 140.00 | 80.00  |
| 73 | 否 | 是 | 是 | 女 | 110.00 | 70.00  | 105.00 | 65.00  |
| 70 | 是 | 否 | 是 | 女 | 135.00 | 86.00  | 139.00 | 90.00  |
| 68 | 否 | 否 | 是 | 女 | 100.00 | 62.00  | 102.00 | 66.00  |
| 82 | 是 | 否 | 是 | 女 | 120.00 | 60.00  | 128.00 | 68.00  |
| 68 | 否 | 是 | 是 | 女 | 122.00 | 64.00  | 126.00 | 70.00  |
| 70 | 是 | 否 | 是 | 女 | 125.00 | 75.00  | 130.00 | 80.00  |
| 67 | 是 | 否 | 是 | 女 | 127.00 | 79.00  | 138.00 | 88.00  |
| 80 | 是 | 否 | 是 | 女 | 145.00 | 86.00  | 150.00 | 90.00  |
| 71 | 否 | 否 | 是 | 女 | 210.00 | 112.00 | 206.00 | 104.00 |
| 69 | 否 | 否 | 是 | 女 | 135.00 | 78.00  | 135.00 | 79.00  |
| 71 | 是 | 否 | 是 | 女 | 130.00 | 67.00  | 132.00 | 69.00  |
| 75 | 是 | 否 | 是 | 女 | 134.00 | 62.00  | 136.00 | 68.00  |
| 67 | 是 | 是 | 是 | 女 | 170.00 | 100.00 | 170.00 | 105.00 |
| 73 | 否 | 否 | 是 | 女 | 120.00 | 60.00  | 124.00 | 68.00  |
| 74 | 是 | 否 | 是 | 女 | 106.00 | 70.00  | 108.00 | 70.00  |
| 73 | 否 | 否 | 是 | 女 | 118.00 | 70.00  | 120.00 | 70.00  |
| 72 | 是 | 否 | 是 | 女 | 139.00 | 89.00  | 135.00 | 85.00  |
| 68 | 是 | 否 | 是 | 女 | 138.00 | 78.00  | 142.00 | 88.00  |
| 67 | 否 | 否 | 是 | 女 | 168.00 | 98.00  | 170.00 | 100.00 |
| 79 | 否 | 否 | 是 | 女 | 110.00 | 80.00  | 115.00 | 80.00  |
| 71 | 是 | 否 | 是 | 女 | 140.00 | 80.00  | 135.00 | 75.00  |
| 71 | 是 | 是 | 是 | 女 | 138.00 | 80.00  | 142.00 | 82.00  |
| 81 | 是 | 是 | 是 | 女 | 140.00 | 70.00  | 135.00 | 78.00  |
| 85 | 是 | 否 | 是 | 女 | 112.00 | 69.00  | 115.00 | 71.00  |
| 70 | 否 | 否 | 是 | 女 | 128.00 | 72.00  | 134.00 | 82.00  |
| 71 | 是 | 否 | 是 | 女 | 139.00 | 76.00  | 136.00 | 70.00  |
| 75 | 是 | 否 | 是 | 女 | 130.00 | 70.00  | 132.00 | 70.00  |
| 69 | 是 | 是 | 是 | 女 | 174.00 | 90.00  | 189.00 | 96.00  |
| 70 | 否 | 否 | 是 | 女 | 123.00 | 76.00  | 118.00 | 67.00  |
| 68 | 是 | 否 | 是 | 女 | 140.00 | 78.00  | 130.00 | 70.00  |
| 78 | 是 | 否 | 是 | 女 | 130.00 | 78.00  | 132.00 | 83.00  |
| 67 | 是 | 否 | 是 | 女 | 145.00 | 86.00  | 146.00 | 88.00  |
| 68 | 是 | 否 | 是 | 女 | 118.00 | 74.00  | 120.00 | 75.00  |
| 66 | 否 | 否 | 是 | 女 | 110.00 | 60.00  | 108.00 | 65.00  |
| 70 | 否 | 否 | 是 | 女 | 120.00 | 70.00  | 125.00 | 78.00  |
| 70 | 是 | 否 | 是 | 女 | 132.00 | 68.00  | 137.00 | 72.00  |
| 76 | 否 | 否 | 是 | 女 | 150.00 | 80.00  | 148.00 | 82.00  |
| 81 | 是 | 否 | 是 | 女 | 138.00 | 87.00  | 104.00 | 67.00  |
| 75 | 是 | 否 | 是 | 女 | 165.00 | 88.00  | 170.00 | 90.00  |
| 79 | 是 | 否 | 是 | 女 | 130.00 | 78.00  | 133.00 | 80.00  |
| 68 | 是 | 否 | 是 | 女 | 136.00 | 85.00  | 139.00 | 89.00  |
| 70 | 是 | 否 | 是 | 女 | 150.00 | 89.00  | 151.00 | 90.00  |
| 79 | 是 | 是 | 是 | 女 | 140.00 | 74.00  | 143.00 | 84.00  |
| 72 | 否 | 否 | 是 | 女 | 124.00 | 73.00  | 130.00 | 75.00  |
| 73 | 否 | 否 | 是 | 女 | 145.00 | 75.00  | 139.00 | 72.00  |
| 67 | 否 | 否 | 是 | 女 | 110.00 | 68.00  | 120.00 | 65.00  |
| 66 | 否 | 否 | 是 | 女 | 116.00 | 78.00  | 120.00 | 78.00  |
| 74 | 否 | 否 | 是 | 女 | 130.00 | 80.00  | 130.00 | 86.00  |
| 71 | 否 | 否 | 是 | 女 | 130.00 | 74.00  | 130.00 | 86.00  |

|    |   |   |   |   |        |        |        |        |
|----|---|---|---|---|--------|--------|--------|--------|
| 89 | 否 | 否 | 是 | 女 | 138.00 | 86.00  | 146.00 | 90.00  |
| 70 | 是 | 否 | 是 | 女 | 128.00 | 70.00  | 130.00 | 74.00  |
| 72 | 否 | 否 | 是 | 女 | 150.00 | 80.00  | 148.00 | 80.00  |
| 72 | 否 | 否 | 是 | 女 | 180.00 | 100.00 | 181.00 | 100.00 |
| 68 | 否 | 否 | 是 | 女 | 130.00 | 96.00  | 124.00 | 90.00  |
| 66 | 是 | 否 | 是 | 女 | 120.00 | 80.00  | 128.00 | 88.00  |
| 71 | 是 | 否 | 是 | 女 | 134.00 | 74.00  | 136.00 | 76.00  |
| 67 | 是 | 否 | 是 | 女 | 150.00 | 90.00  | 149.00 | 85.00  |
| 82 | 否 | 否 | 是 | 女 | 108.00 | 73.00  | 110.00 | 75.00  |
| 74 | 否 | 否 | 是 | 女 | 150.00 | 90.00  | 160.00 | 90.00  |
| 73 | 否 | 否 | 是 | 女 | 112.00 | 78.00  | 110.00 | 80.00  |
| 73 | 否 | 是 | 是 | 女 | 120.00 | 67.00  | 125.00 | 70.00  |
| 94 | 是 | 否 | 是 | 女 | 150.00 | 82.00  | 152.00 | 85.00  |
| 79 | 是 | 是 | 是 | 女 | 160.00 | 82.00  | 166.00 | 90.00  |
| 70 | 是 | 是 | 是 | 女 | 130.00 | 68.00  | 138.00 | 70.00  |
| 74 | 否 | 否 | 是 | 女 | 130.00 | 88.00  | 136.00 | 90.00  |
| 77 | 是 | 是 | 是 | 女 | 143.00 | 71.00  | 156.00 | 72.00  |
| 75 | 否 | 否 | 是 | 女 | 132.00 | 80.00  | 135.00 | 82.00  |
| 67 | 是 | 否 | 是 | 女 | 138.00 | 89.00  | 135.00 | 85.00  |
| 76 | 是 | 否 | 是 | 女 | 185.00 | 98.00  | 188.00 | 99.00  |
| 89 | 否 | 否 | 是 | 女 | 120.00 | 80.00  | 119.00 | 73.00  |
| 74 | 是 | 是 | 是 | 女 | 140.00 | 100.00 | 140.00 | 90.00  |
| 77 | 否 | 否 | 是 | 女 | 152.00 | 104.00 | 145.00 | 97.00  |
| 83 | 是 | 否 | 是 | 女 | 150.00 | 80.00  | 153.00 | 80.00  |
| 79 | 是 | 是 | 是 | 女 | 177.00 | 71.00  | 176.00 | 85.00  |
| 68 | 否 | 是 | 是 | 女 | 113.00 | 63.00  | 110.00 | 61.00  |
| 75 | 否 | 否 | 是 | 女 | 132.00 | 80.00  | 135.00 | 82.00  |
| 67 | 否 | 否 | 是 | 女 | 130.00 | 86.00  | 120.00 | 85.00  |
| 66 | 是 | 是 | 是 | 女 | 135.00 | 82.00  | 136.00 | 85.00  |
| 91 | 否 | 否 | 是 | 女 | 140.00 | 80.00  | 132.00 | 77.00  |
| 69 | 是 | 是 | 是 | 女 | 134.00 | 82.00  | 139.00 | 82.00  |
| 66 | 是 | 否 | 否 | 女 | 130.00 | 80.00  | 135.00 | 82.00  |
| 87 | 否 | 否 | 是 | 女 | 130.00 | 85.00  | 133.00 | 87.00  |
| 75 | 是 | 否 | 是 | 女 | 138.00 | 78.00  | 137.00 | 76.00  |
| 73 | 否 | 否 | 是 | 女 | 138.00 | 87.00  | 135.00 | 82.00  |
| 80 | 否 | 否 | 是 | 女 | 128.00 | 84.00  | 128.00 | 88.00  |
| 71 | 是 | 否 | 是 | 女 | 135.00 | 85.00  | 138.00 | 89.00  |
| 71 | 是 | 否 | 是 | 女 | 163.00 | 95.00  | 165.00 | 86.00  |
| 86 | 否 | 否 | 是 | 女 | 138.00 | 66.00  | 139.00 | 68.00  |
| 76 | 是 | 否 | 是 | 女 | 130.00 | 70.00  | 126.00 | 88.00  |
| 70 | 否 | 否 | 是 | 女 | 120.00 | 80.00  | 131.00 | 88.00  |
| 74 | 是 | 否 | 是 | 女 | 130.00 | 78.00  | 135.00 | 80.00  |
| 74 | 是 | 否 | 是 | 女 | 122.00 | 66.00  | 128.00 | 70.00  |
| 85 | 是 | 否 | 是 | 女 | 130.00 | 78.00  | 134.00 | 80.00  |
| 66 | 否 | 否 | 否 | 女 | 152.00 | 70.00  | 146.00 | 74.00  |
| 74 | 是 | 否 | 是 | 女 | 138.00 | 72.00  | 139.00 | 65.00  |
| 69 | 是 | 否 | 是 | 女 | 140.00 | 86.00  | 140.00 | 90.00  |
| 77 | 是 | 否 | 是 | 女 | 163.00 | 105.00 | 166.00 | 108.00 |
| 72 | 是 | 是 | 是 | 女 | 140.00 | 70.00  | 138.00 | 76.00  |
| 73 | 是 | 否 | 是 | 女 | 120.00 | 70.00  | 124.00 | 72.00  |
| 73 | 是 | 否 | 是 | 女 | 118.00 | 70.00  | 120.00 | 70.00  |

|    |   |   |   |   |        |        |        |        |
|----|---|---|---|---|--------|--------|--------|--------|
| 68 | 否 | 否 | 是 | 女 | 136.00 | 83.00  | 135.00 | 80.00  |
| 82 | 是 | 否 | 是 | 女 | 205.00 | 99.00  | 210.00 | 114.00 |
| 70 | 否 | 否 | 是 | 女 | 160.00 | 100.00 | 166.00 | 100.00 |
| 73 | 否 | 否 | 是 | 女 | 140.00 | 90.00  | 134.00 | 89.00  |
| 72 | 是 | 是 | 是 | 女 | 128.00 | 84.00  | 130.00 | 86.00  |
| 67 | 否 | 否 | 是 | 女 | 138.00 | 79.00  | 140.00 | 80.00  |
| 73 | 否 | 否 | 是 | 女 | 120.00 | 80.00  | 130.00 | 70.00  |
| 82 | 是 | 否 | 是 | 女 | 140.00 | 66.00  | 140.00 | 70.00  |
| 71 | 是 | 是 | 是 | 女 | 120.00 | 70.00  | 128.00 | 80.00  |
| 73 | 是 | 否 | 是 | 女 | 109.00 | 76.00  | 112.00 | 78.00  |
| 70 | 是 | 否 | 是 | 女 | 158.00 | 90.00  | 169.00 | 96.00  |
| 77 | 是 | 否 | 是 | 女 | 116.00 | 72.00  | 124.00 | 61.00  |
| 69 | 是 | 否 | 是 | 女 | 132.00 | 82.00  | 130.00 | 80.00  |
| 74 | 否 | 否 | 是 | 女 | 124.00 | 74.00  | 120.00 | 76.00  |
| 73 | 是 | 是 | 是 | 女 | 132.00 | 82.00  | 136.00 | 84.00  |
| 72 | 否 | 否 | 是 | 女 | 120.00 | 64.00  | 116.00 | 62.00  |
| 88 | 否 | 否 | 是 | 女 | 130.00 | 70.00  | 132.00 | 76.00  |
| 72 | 否 | 否 | 是 | 女 | 136.00 | 76.00  | 139.00 | 79.00  |
| 73 | 否 | 是 | 是 | 女 | 115.00 | 66.00  | 110.00 | 66.00  |
| 69 | 否 | 否 | 是 | 女 | 137.00 | 72.00  | 147.00 | 70.00  |
| 70 | 否 | 是 | 是 | 女 | 140.00 | 90.00  | 145.00 | 96.00  |
| 74 | 否 | 否 | 是 | 女 | 139.00 | 80.00  | 140.00 | 80.00  |
| 73 | 是 | 否 | 是 | 女 | 121.00 | 60.00  | 120.00 | 62.00  |
| 71 | 是 | 否 | 是 | 女 | 136.00 | 78.00  | 142.00 | 80.00  |
| 69 | 否 | 否 | 是 | 女 | 118.00 | 70.00  | 116.00 | 72.00  |
| 69 | 否 | 否 | 是 | 女 | 129.00 | 90.00  | 139.00 | 96.00  |
| 85 | 是 | 否 | 是 | 女 | 135.00 | 71.00  | 123.00 | 66.00  |
| 71 | 是 | 否 | 是 | 女 | 138.00 | 80.00  | 140.00 | 80.00  |
| 71 | 是 | 否 | 是 | 女 | 128.00 | 78.00  | 132.00 | 80.00  |
| 71 | 否 | 否 | 是 | 女 | 112.00 | 68.00  | 114.00 | 69.00  |
| 67 | 否 | 否 | 是 | 女 | 150.00 | 80.00  | 154.00 | 80.00  |
| 87 | 否 | 否 | 是 | 女 | 118.00 | 75.00  | 120.00 | 78.00  |
| 76 | 是 | 是 | 是 | 女 | 130.00 | 66.00  | 137.00 | 68.00  |
| 73 | 否 | 否 | 是 | 女 | 163.00 | 98.00  | 164.00 | 101.00 |
| 69 | 否 | 是 | 是 | 女 | 134.00 | 84.00  | 139.00 | 89.00  |
| 73 | 否 | 否 | 是 | 女 | 139.00 | 79.00  | 138.00 | 78.00  |
| 72 | 否 | 否 | 是 | 女 | 112.00 | 62.00  | 120.00 | 70.00  |
| 66 | 是 | 否 | 是 | 女 | 160.00 | 97.00  | 162.00 | 98.00  |
| 70 | 是 | 是 | 是 | 女 | 160.00 | 90.00  | 155.00 | 85.00  |
| 70 | 是 | 否 | 是 | 女 | 150.00 | 85.00  | 148.00 | 79.00  |
| 69 | 否 | 否 | 是 | 女 | 135.00 | 91.00  | 131.00 | 78.00  |
| 74 | 是 | 是 | 是 | 女 | 138.00 | 85.00  | 140.00 | 90.00  |
| 70 | 否 | 否 | 是 | 女 | 142.00 | 90.00  | 150.00 | 90.00  |
| 75 | 否 | 否 | 是 | 女 | 120.00 | 78.00  | 123.00 | 87.00  |
| 81 | 否 | 否 | 是 | 女 | 126.00 | 74.00  | 128.00 | 76.00  |
| 69 | 否 | 否 | 是 | 女 | 130.00 | 85.00  | 138.00 | 86.00  |
| 73 | 是 | 否 | 是 | 女 | 156.00 | 84.00  | 152.00 | 84.00  |
| 71 | 是 | 否 | 是 | 女 | 135.00 | 80.00  | 138.00 | 80.00  |
| 76 | 是 | 是 | 是 | 女 | 139.00 | 88.00  | 135.00 | 78.00  |
| 77 | 否 | 否 | 是 | 女 | 120.00 | 74.00  | 120.00 | 74.00  |
| 86 | 是 | 是 | 是 | 女 | 154.00 | 81.00  | 160.00 | 80.00  |

|    |    |   |   |   |        |        |        |        |
|----|----|---|---|---|--------|--------|--------|--------|
| 69 | 是  | 否 | 是 | 女 | 130.00 | 80.00  | 136.00 | 82.00  |
| 74 | 是否 | 否 | 是 | 女 | 120.00 | 80.00  | 120.00 | 80.00  |
| 70 | 否  | 否 | 是 | 女 | 148.00 | 93.00  | 152.00 | 88.00  |
| 66 | 否  | 否 | 是 | 女 | 152.00 | 83.00  | 155.00 | 93.00  |
| 67 | 是  | 否 | 是 | 女 | 142.00 | 88.00  | 144.00 | 89.00  |
| 81 | 是  | 否 | 是 | 女 | 120.00 | 65.00  | 119.00 | 63.00  |
| 67 | 是  | 是 | 是 | 女 | 140.00 | 72.00  | 136.00 | 68.00  |
| 68 | 是否 | 否 | 是 | 女 | 100.00 | 60.00  | 102.00 | 62.00  |
| 69 | 否  | 否 | 是 | 女 | 106.00 | 66.00  | 110.00 | 70.00  |
| 69 | 是  | 是 | 是 | 女 | 120.00 | 70.00  | 126.00 | 76.00  |
| 73 | 是  | 否 | 是 | 女 | 128.00 | 68.00  | 130.00 | 70.00  |
| 72 | 是  | 否 | 是 | 女 | 135.00 | 85.00  | 139.00 | 89.00  |
| 79 | 是  | 否 | 是 | 女 | 131.00 | 63.00  | 135.00 | 67.00  |
| 71 | 是  | 否 | 是 | 女 | 166.00 | 100.00 | 160.00 | 105.00 |
| 70 | 是  | 是 | 是 | 女 | 105.00 | 65.00  | 100.00 | 60.00  |
| 71 | 是  | 否 | 是 | 女 | 134.00 | 78.00  | 138.00 | 76.00  |
| 66 | 是否 | 否 | 是 | 女 | 138.00 | 89.00  | 128.00 | 89.00  |
| 88 | 否  | 否 | 是 | 女 | 141.00 | 85.00  | 145.00 | 89.00  |
| 67 | 是  | 是 | 是 | 女 | 144.00 | 80.00  | 139.00 | 85.00  |
| 82 | 是  | 否 | 是 | 女 | 129.00 | 80.00  | 139.00 | 82.00  |
| 69 | 是  | 是 | 是 | 女 | 155.00 | 90.00  | 164.00 | 95.00  |
| 67 | 是否 | 是 | 是 | 女 | 120.00 | 75.00  | 122.00 | 78.00  |
| 80 | 是  | 否 | 是 | 女 | 138.00 | 70.00  | 140.00 | 70.00  |
| 67 | 是否 | 否 | 是 | 女 | 116.00 | 70.00  | 120.00 | 70.00  |
| 78 | 否  | 否 | 是 | 女 | 120.00 | 70.00  | 125.00 | 80.00  |
| 69 | 否  | 是 | 是 | 女 | 100.00 | 60.00  | 101.00 | 61.00  |
| 67 | 是  | 是 | 是 | 女 | 110.00 | 64.00  | 116.00 | 68.00  |
| 90 | 是  | 否 | 是 | 女 | 160.00 | 60.00  | 160.00 | 70.00  |
| 72 | 是  | 否 | 是 | 女 | 170.00 | 90.00  | 190.00 | 95.00  |
| 67 | 是否 | 否 | 是 | 女 | 122.00 | 82.00  | 126.00 | 86.00  |
| 68 | 否  | 否 | 是 | 女 | 118.00 | 70.00  | 120.00 | 72.00  |
| 72 | 是  | 否 | 是 | 女 | 130.00 | 80.00  | 135.00 | 85.00  |
| 75 | 是  | 否 | 是 | 女 | 133.00 | 79.00  | 136.00 | 82.00  |
| 73 | 是  | 否 | 是 | 女 | 159.00 | 81.00  | 160.00 | 80.00  |
| 71 | 是  | 否 | 是 | 女 | 162.00 | 91.00  | 169.00 | 92.00  |
| 72 | 是否 | 否 | 是 | 女 | 135.00 | 89.00  | 140.00 | 90.00  |
| 87 | 是  | 否 | 是 | 女 | 110.00 | 60.00  | 114.00 | 62.00  |
| 78 | 是  | 否 | 是 | 女 | 119.00 | 66.00  | 122.00 | 68.00  |
| 81 | 是  | 是 | 是 | 女 | 139.00 | 72.00  | 144.00 | 68.00  |
| 72 | 是否 | 是 | 是 | 女 | 125.00 | 78.00  | 124.00 | 80.00  |
| 71 | 否  | 是 | 是 | 女 | 169.00 | 70.00  | 159.00 | 72.00  |
| 72 | 是  | 否 | 是 | 女 | 120.00 | 89.00  | 115.00 | 84.00  |
| 74 | 是  | 否 | 是 | 女 | 169.00 | 86.00  | 172.00 | 82.00  |
| 72 | 是  | 否 | 是 | 女 | 118.00 | 62.00  | 114.00 | 60.00  |
| 75 | 是  | 否 | 是 | 女 | 139.00 | 90.00  | 136.00 | 84.00  |
| 68 | 是  | 是 | 是 | 女 | 132.00 | 78.00  | 135.00 | 80.00  |
| 80 | 是否 | 否 | 是 | 女 | 108.00 | 76.00  | 110.00 | 80.00  |
| 71 | 否  | 否 | 是 | 女 | 170.00 | 80.00  | 180.00 | 80.00  |
| 73 | 是  | 否 | 是 | 女 | 130.00 | 70.00  | 136.00 | 76.00  |
| 80 | 是否 | 否 | 是 | 女 | 140.00 | 60.00  | 136.00 | 66.00  |
| 68 | 否  | 否 | 是 | 女 | 119.00 | 91.00  | 133.00 | 97.00  |

|    |   |   |   |   |        |        |        |        |
|----|---|---|---|---|--------|--------|--------|--------|
| 73 | 否 | 否 | 是 | 女 | 126.00 | 72.00  | 118.00 | 70.00  |
| 66 | 是 | 否 | 否 | 女 | 128.00 | 68.00  | 132.00 | 70.00  |
| 83 | 是 | 否 | 是 | 女 | 135.00 | 70.00  | 137.00 | 78.00  |
| 78 | 是 | 否 | 是 | 女 | 132.00 | 84.00  | 136.00 | 88.00  |
| 76 | 是 | 否 | 是 | 女 | 138.00 | 80.00  | 140.00 | 80.00  |
| 71 | 否 | 否 | 是 | 女 | 135.00 | 70.00  | 130.00 | 70.00  |
| 68 | 否 | 否 | 是 | 女 | 106.00 | 68.00  | 108.00 | 72.00  |
| 89 | 是 | 否 | 是 | 女 | 110.00 | 70.00  | 115.00 | 64.00  |
| 69 | 否 | 否 | 是 | 女 | 111.00 | 72.00  | 115.00 | 76.00  |
| 82 | 是 | 是 | 是 | 女 | 140.00 | 70.00  | 148.00 | 66.00  |
| 83 | 是 | 否 | 是 | 女 | 194.00 | 90.00  | 171.00 | 93.00  |
| 70 | 是 | 是 | 是 | 女 | 130.00 | 70.00  | 125.00 | 65.00  |
| 76 | 否 | 否 | 是 | 女 | 128.00 | 60.00  | 125.00 | 65.00  |
| 79 | 是 | 否 | 是 | 女 | 138.00 | 72.00  | 146.00 | 89.00  |
| 68 | 否 | 否 | 是 | 女 | 139.00 | 72.00  | 138.00 | 74.00  |
| 74 | 是 | 否 | 是 | 女 | 186.00 | 76.00  | 190.00 | 80.00  |
| 70 | 否 | 否 | 是 | 女 | 120.00 | 80.00  | 120.00 | 85.00  |
| 68 | 否 | 否 | 是 | 女 | 130.00 | 78.00  | 130.00 | 86.00  |
| 67 | 否 | 否 | 是 | 女 | 118.00 | 68.00  | 120.00 | 64.00  |
| 78 | 否 | 否 | 是 | 女 | 146.00 | 82.00  | 150.00 | 86.00  |
| 70 | 否 | 是 | 是 | 女 | 120.00 | 76.00  | 124.00 | 80.00  |
| 67 | 否 | 否 | 是 | 女 | 100.00 | 60.00  | 109.00 | 67.00  |
| 70 | 否 | 否 | 是 | 女 | 112.00 | 76.00  | 120.00 | 78.00  |
| 80 | 是 | 否 | 是 | 女 | 140.00 | 89.00  | 145.00 | 90.00  |
| 74 | 是 | 否 | 是 | 女 | 140.00 | 70.00  | 135.00 | 70.00  |
| 68 | 是 | 否 | 是 | 女 | 128.00 | 76.00  | 130.00 | 78.00  |
| 66 | 否 | 否 | 是 | 女 | 137.00 | 87.00  | 139.00 | 89.00  |
| 75 | 否 | 否 | 是 | 女 | 134.00 | 88.00  | 136.00 | 74.00  |
| 83 | 否 | 否 | 是 | 女 | 98.00  | 60.00  | 96.00  | 60.00  |
| 68 | 否 | 是 | 是 | 女 | 107.00 | 71.00  | 110.00 | 74.00  |
| 86 | 否 | 否 | 是 | 女 | 122.00 | 74.00  | 125.00 | 77.00  |
| 80 | 是 | 否 | 是 | 女 | 160.00 | 100.00 | 166.00 | 106.00 |
| 73 | 否 | 否 | 是 | 女 | 126.00 | 78.00  | 130.00 | 82.00  |
| 69 | 是 | 否 | 是 | 女 | 136.00 | 86.00  | 140.00 | 86.00  |
| 75 | 否 | 否 | 是 | 女 | 112.00 | 77.00  | 110.00 | 80.00  |
| 66 | 是 | 是 | 是 | 女 | 140.00 | 80.00  | 143.00 | 80.00  |
| 73 | 是 | 是 | 是 | 女 | 139.00 | 84.00  | 138.00 | 82.00  |
| 67 | 否 | 否 | 是 | 女 | 139.00 | 85.00  | 140.00 | 88.00  |
| 77 | 是 | 是 | 是 | 女 | 142.00 | 91.00  | 146.00 | 92.00  |
| 73 | 否 | 否 | 是 | 女 | 138.00 | 90.00  | 140.00 | 90.00  |
| 70 | 否 | 否 | 是 | 女 | 137.00 | 87.00  | 134.00 | 88.00  |
| 81 | 是 | 否 | 是 | 女 | 150.00 | 90.00  | 148.00 | 90.00  |
| 74 | 否 | 是 | 是 | 女 | 140.00 | 75.00  | 122.00 | 70.00  |
| 74 | 否 | 否 | 是 | 女 | 120.00 | 80.00  | 122.00 | 80.00  |
| 76 | 是 | 否 | 是 | 女 | 150.00 | 87.00  | 151.00 | 89.00  |
| 84 | 否 | 是 | 是 | 女 | 150.00 | 78.00  | 156.00 | 82.00  |
| 75 | 是 | 是 | 是 | 女 | 120.00 | 80.00  | 123.00 | 88.00  |
| 88 | 是 | 否 | 是 | 女 | 148.00 | 86.00  | 152.00 | 90.00  |
| 66 | 是 | 否 | 是 | 女 | 105.00 | 65.00  | 100.00 | 60.00  |
| 72 | 否 | 否 | 是 | 女 | 110.00 | 80.00  | 105.00 | 75.00  |
| 67 | 否 | 否 | 是 | 女 | 120.00 | 78.00  | 110.00 | 70.00  |

|    |   |   |   |   |        |        |        |        |
|----|---|---|---|---|--------|--------|--------|--------|
| 67 | 否 | 否 | 是 | 女 | 160.00 | 92.00  | 162.00 | 93.00  |
| 79 | 是 | 否 | 是 | 女 | 140.00 | 70.00  | 150.00 | 80.00  |
| 70 | 否 | 否 | 是 | 女 | 122.00 | 68.00  | 119.00 | 68.00  |
| 71 | 是 | 否 | 是 | 女 | 127.00 | 70.00  | 139.00 | 68.00  |
| 69 | 是 | 否 | 是 | 女 | 134.00 | 73.00  | 139.00 | 78.00  |
| 68 | 是 | 是 | 是 | 女 | 139.00 | 78.00  | 139.00 | 80.00  |
| 66 | 是 | 否 | 是 | 女 | 140.00 | 78.00  | 148.00 | 90.00  |
| 71 | 是 | 是 | 是 | 女 | 142.00 | 86.00  | 145.00 | 90.00  |
| 68 | 是 | 否 | 是 | 女 | 116.00 | 78.00  | 118.00 | 80.00  |
| 77 | 否 | 否 | 是 | 女 | 127.00 | 86.00  | 130.00 | 84.00  |
| 75 | 是 | 否 | 是 | 女 | 139.00 | 89.00  | 138.00 | 88.00  |
| 84 | 是 | 否 | 是 | 女 | 120.00 | 60.00  | 122.00 | 61.00  |
| 71 | 是 | 否 | 是 | 女 | 117.00 | 75.00  | 120.00 | 78.00  |
| 83 | 是 | 否 | 是 | 女 | 138.00 | 78.00  | 130.00 | 77.00  |
| 68 | 否 | 否 | 是 | 女 | 102.00 | 75.00  | 100.00 | 78.00  |
| 78 | 是 | 否 | 是 | 女 | 118.00 | 65.00  | 108.00 | 68.00  |
| 70 | 否 | 否 | 是 | 女 | 138.00 | 70.00  | 142.00 | 72.00  |
| 80 | 是 | 否 | 是 | 女 | 135.00 | 62.00  | 130.00 | 60.00  |
| 70 | 是 | 否 | 是 | 女 | 112.00 | 70.00  | 117.00 | 78.00  |
| 70 | 是 | 否 | 是 | 女 | 118.00 | 76.00  | 120.00 | 78.00  |
| 76 | 是 | 否 | 是 | 女 | 140.00 | 80.00  | 135.00 | 79.00  |
| 77 | 是 | 是 | 是 | 女 | 138.00 | 88.00  | 140.00 | 90.00  |
| 70 | 是 | 否 | 是 | 女 | 150.00 | 80.00  | 153.00 | 78.00  |
| 76 | 是 | 否 | 是 | 女 | 135.00 | 80.00  | 138.00 | 80.00  |
| 67 | 是 | 是 | 是 | 女 | 118.00 | 76.00  | 124.00 | 80.00  |
| 73 | 是 | 否 | 是 | 女 | 150.00 | 100.00 | 150.00 | 90.00  |
| 67 | 否 | 否 | 是 | 女 | 130.00 | 76.00  | 128.00 | 70.00  |
| 93 | 是 | 否 | 是 | 女 | 139.00 | 80.00  | 136.00 | 82.00  |
| 70 | 是 | 否 | 是 | 女 | 134.00 | 77.00  | 140.00 | 70.00  |
| 70 | 否 | 否 | 是 | 女 | 123.00 | 60.00  | 98.00  | 62.00  |
| 89 | 是 | 否 | 是 | 女 | 134.00 | 84.00  | 140.00 | 90.00  |
| 75 | 否 | 否 | 是 | 女 | 136.00 | 72.00  | 138.00 | 89.00  |
| 69 | 否 | 否 | 是 | 女 | 129.00 | 74.00  | 158.00 | 81.00  |
| 69 | 是 | 是 | 是 | 女 | 140.00 | 73.00  | 124.00 | 66.00  |
| 70 | 是 | 否 | 是 | 女 | 122.00 | 82.00  | 120.00 | 78.00  |
| 79 | 是 | 否 | 是 | 女 | 130.00 | 70.00  | 138.00 | 78.00  |
| 72 | 是 | 是 | 是 | 女 | 130.00 | 75.00  | 120.00 | 70.00  |
| 70 | 是 | 否 | 是 | 女 | 115.00 | 75.00  | 120.00 | 70.00  |
| 72 | 是 | 否 | 是 | 女 | 139.00 | 73.00  | 137.00 | 74.00  |
| 69 | 是 | 否 | 是 | 女 | 158.00 | 96.00  | 160.00 | 100.00 |
| 76 | 否 | 否 | 是 | 女 | 118.00 | 75.00  | 120.00 | 80.00  |
| 87 | 否 | 否 | 是 | 女 | 136.00 | 86.00  | 140.00 | 88.00  |
| 67 | 是 | 否 | 是 | 女 | 146.00 | 80.00  | 144.00 | 78.00  |
| 66 | 否 | 否 | 是 | 女 | 110.00 | 76.00  | 110.00 | 78.00  |
| 71 | 是 | 否 | 是 | 女 | 146.00 | 86.00  | 150.00 | 90.00  |
| 70 | 是 | 否 | 是 | 女 | 135.00 | 86.00  | 140.00 | 90.00  |
| 77 | 是 | 是 | 是 | 女 | 161.00 | 78.00  | 165.00 | 80.00  |
| 90 | 是 | 否 | 是 | 女 | 190.00 | 100.00 | 150.00 | 70.00  |
| 83 | 是 | 否 | 是 | 女 | 146.00 | 80.00  | 150.00 | 82.00  |
| 78 | 是 | 否 | 是 | 女 | 140.00 | 70.00  | 140.00 | 80.00  |
| 71 | 是 | 是 | 是 | 女 | 130.00 | 70.00  | 131.00 | 77.00  |

|    |   |   |   |   |        |        |        |        |
|----|---|---|---|---|--------|--------|--------|--------|
| 76 | 否 | 否 | 是 | 女 | 120.00 | 80.00  | 122.00 | 84.00  |
| 76 | 是 | 是 | 是 | 女 | 120.00 | 76.00  | 123.00 | 84.00  |
| 66 | 是 | 否 | 是 | 女 | 138.00 | 88.00  | 135.00 | 85.00  |
| 69 | 是 | 否 | 是 | 女 | 135.00 | 78.00  | 120.00 | 80.00  |
| 66 | 是 | 否 | 是 | 女 | 130.00 | 80.00  | 132.00 | 80.00  |
| 70 | 是 | 否 | 是 | 女 | 126.00 | 76.00  | 130.00 | 80.00  |
| 69 | 是 | 否 | 是 | 女 | 140.00 | 75.00  | 145.00 | 76.00  |
| 76 | 是 | 是 | 是 | 女 | 128.00 | 72.00  | 132.00 | 76.00  |
| 79 | 否 | 否 | 是 | 女 | 98.00  | 60.00  | 100.00 | 60.00  |
| 68 | 否 | 否 | 是 | 女 | 120.00 | 80.00  | 120.00 | 80.00  |
| 66 | 否 | 否 | 是 | 女 | 150.00 | 90.00  | 140.00 | 80.00  |
| 67 | 否 | 否 | 是 | 女 | 120.00 | 70.00  | 125.00 | 80.00  |
| 81 | 是 | 否 | 是 | 女 | 148.00 | 89.00  | 150.00 | 90.00  |
| 67 | 否 | 否 | 是 | 女 | 127.00 | 76.00  | 128.00 | 78.00  |
| 69 | 是 | 否 | 是 | 女 | 134.00 | 78.00  | 138.00 | 78.00  |
| 75 | 是 | 否 | 是 | 女 | 170.00 | 98.00  | 170.00 | 100.00 |
| 77 | 是 | 是 | 是 | 女 | 114.00 | 64.00  | 118.00 | 68.00  |
| 74 | 是 | 否 | 是 | 女 | 140.00 | 80.00  | 140.00 | 90.00  |
| 73 | 否 | 否 | 是 | 女 | 128.00 | 72.00  | 130.00 | 80.00  |
| 68 | 否 | 否 | 是 | 女 | 130.00 | 82.00  | 132.00 | 82.00  |
| 68 | 是 | 否 | 是 | 女 | 175.00 | 85.00  | 180.00 | 90.00  |
| 76 | 是 | 否 | 是 | 女 | 128.00 | 84.00  | 136.00 | 88.00  |
| 67 | 否 | 否 | 是 | 女 | 150.00 | 80.00  | 162.00 | 84.00  |
| 75 | 是 | 否 | 是 | 女 | 167.00 | 89.00  | 162.00 | 90.00  |
| 71 | 否 | 否 | 是 | 女 | 138.00 | 88.00  | 140.00 | 90.00  |
| 71 | 是 | 否 | 是 | 女 | 110.00 | 60.00  | 120.00 | 60.00  |
| 67 | 是 | 是 | 是 | 女 | 124.00 | 80.00  | 120.00 | 84.00  |
| 71 | 是 | 否 | 是 | 女 | 138.00 | 94.00  | 142.00 | 98.00  |
| 66 | 是 | 否 | 否 | 女 | 130.00 | 70.00  | 150.00 | 80.00  |
| 67 | 否 | 否 | 是 | 女 | 118.00 | 64.00  | 122.00 | 68.00  |
| 70 | 否 | 否 | 是 | 女 | 133.00 | 75.00  | 136.00 | 78.00  |
| 69 | 是 | 否 | 是 | 女 | 148.00 | 98.00  | 150.00 | 100.00 |
| 76 | 否 | 否 | 是 | 女 | 135.00 | 77.00  | 138.00 | 80.00  |
| 67 | 否 | 否 | 是 | 女 | 136.00 | 88.00  | 138.00 | 88.00  |
| 66 | 是 | 否 | 否 | 女 | 158.00 | 86.00  | 162.00 | 90.00  |
| 77 | 否 | 是 | 是 | 女 | 133.00 | 85.00  | 136.00 | 88.00  |
| 66 | 否 | 否 | 是 | 女 | 136.00 | 84.00  | 138.00 | 88.00  |
| 71 | 否 | 否 | 是 | 女 | 136.00 | 88.00  | 138.00 | 89.00  |
| 71 | 是 | 否 | 是 | 女 | 178.00 | 70.00  | 180.00 | 70.00  |
| 67 | 是 | 否 | 是 | 女 | 110.00 | 62.00  | 110.00 | 60.00  |
| 67 | 是 | 否 | 是 | 女 | 133.00 | 69.00  | 136.00 | 72.00  |
| 76 | 是 | 否 | 是 | 女 | 110.00 | 59.00  | 114.00 | 63.00  |
| 74 | 是 | 否 | 是 | 女 | 129.00 | 81.00  | 132.00 | 84.00  |
| 81 | 否 | 否 | 是 | 女 | 133.00 | 71.00  | 130.00 | 70.00  |
| 73 | 是 | 否 | 是 | 女 | 144.00 | 80.00  | 146.00 | 80.00  |
| 72 | 是 | 否 | 是 | 女 | 135.00 | 80.00  | 139.00 | 88.00  |
| 79 | 否 | 否 | 是 | 女 | 133.00 | 65.00  | 135.00 | 70.00  |
| 77 | 是 | 否 | 是 | 女 | 180.00 | 82.00  | 150.00 | 80.00  |
| 69 | 是 | 否 | 是 | 女 | 135.00 | 80.00  | 138.00 | 84.00  |
| 68 | 是 | 否 | 是 | 女 | 160.00 | 100.00 | 150.00 | 100.00 |
| 77 | 是 | 是 | 是 | 女 | 142.00 | 79.00  | 148.00 | 80.00  |

|    |   |   |   |   |        |        |        |        |
|----|---|---|---|---|--------|--------|--------|--------|
| 80 | 否 | 是 | 是 | 女 | 130.00 | 70.00  | 132.00 | 76.00  |
| 72 | 是 | 否 | 是 | 女 | 132.00 | 76.00  | 135.00 | 78.00  |
| 88 | 否 | 否 | 是 | 女 | 122.00 | 80.00  | 130.00 | 77.00  |
| 79 | 是 | 否 | 是 | 女 | 135.00 | 80.00  | 134.00 | 83.00  |
| 87 | 是 | 否 | 是 | 女 | 166.00 | 86.00  | 174.00 | 82.00  |
| 76 | 是 | 否 | 是 | 女 | 130.00 | 70.00  | 135.00 | 70.00  |
| 66 | 否 | 否 | 否 | 女 | 130.00 | 75.00  | 135.00 | 80.00  |
| 98 | 是 | 否 | 是 | 女 | 135.00 | 70.00  | 138.00 | 70.00  |
| 75 | 是 | 否 | 是 | 女 | 120.00 | 80.00  | 125.00 | 83.00  |
| 67 | 否 | 否 | 是 | 女 | 138.00 | 89.00  | 141.00 | 90.00  |
| 70 | 是 | 否 | 是 | 女 | 129.00 | 82.00  | 114.00 | 70.00  |
| 68 | 否 | 否 | 是 | 女 | 120.00 | 64.00  | 122.00 | 64.00  |
| 83 | 是 | 否 | 是 | 女 | 128.00 | 72.00  | 132.00 | 76.00  |
| 67 | 是 | 是 | 是 | 女 | 167.00 | 99.00  | 164.00 | 94.00  |
| 74 | 否 | 否 | 是 | 女 | 136.00 | 89.00  | 139.00 | 84.00  |
| 76 | 是 | 是 | 是 | 女 | 120.00 | 82.00  | 130.00 | 80.00  |
| 73 | 否 | 否 | 是 | 女 | 100.00 | 80.00  | 102.00 | 80.00  |
| 69 | 是 | 否 | 是 | 女 | 137.00 | 83.00  | 139.00 | 84.00  |
| 71 | 否 | 否 | 是 | 女 | 142.00 | 100.00 | 134.00 | 98.00  |
| 77 | 是 | 否 | 是 | 女 | 100.00 | 70.00  | 105.00 | 70.00  |
| 74 | 否 | 否 | 是 | 女 | 134.00 | 80.00  | 136.00 | 81.00  |
| 66 | 是 | 否 | 是 | 女 | 122.00 | 68.00  | 124.00 | 70.00  |
| 70 | 否 | 否 | 是 | 女 | 151.00 | 79.00  | 140.00 | 83.00  |
| 67 | 是 | 是 | 是 | 女 | 134.00 | 78.00  | 138.00 | 80.00  |
| 75 | 是 | 否 | 是 | 女 | 158.00 | 81.00  | 152.00 | 79.00  |
| 82 | 是 | 否 | 是 | 女 | 132.00 | 64.00  | 134.00 | 66.00  |
| 73 | 是 | 否 | 是 | 女 | 144.00 | 90.00  | 144.00 | 92.00  |
| 68 | 是 | 否 | 是 | 女 | 130.00 | 86.00  | 135.00 | 88.00  |
| 74 | 是 | 否 | 是 | 女 | 156.00 | 78.00  | 158.00 | 80.00  |
| 66 | 否 | 否 | 是 | 女 | 128.00 | 69.00  | 134.00 | 77.00  |
| 74 | 否 | 否 | 是 | 女 | 126.00 | 64.00  | 128.00 | 66.00  |
| 73 | 是 | 否 | 是 | 女 | 135.00 | 80.00  | 137.00 | 68.00  |
| 66 | 否 | 否 | 是 | 女 | 138.00 | 88.00  | 140.00 | 90.00  |
| 79 | 是 | 否 | 是 | 女 | 130.00 | 78.00  | 139.00 | 82.00  |
| 69 | 否 | 否 | 是 | 女 | 135.00 | 90.00  | 138.00 | 90.00  |
| 76 | 是 | 否 | 是 | 女 | 121.00 | 70.00  | 110.00 | 72.00  |
| 72 | 否 | 否 | 是 | 女 | 148.00 | 98.00  | 150.00 | 100.00 |
| 68 | 是 | 否 | 是 | 女 | 132.00 | 80.00  | 138.00 | 80.00  |
| 69 | 是 | 否 | 是 | 女 | 164.00 | 86.00  | 156.00 | 83.00  |
| 73 | 否 | 否 | 是 | 女 | 124.00 | 64.00  | 131.00 | 64.00  |
| 83 | 是 | 否 | 是 | 女 | 140.00 | 72.00  | 138.00 | 76.00  |
| 90 | 否 | 否 | 是 | 女 | 131.00 | 90.00  | 138.00 | 88.00  |
| 74 | 是 | 是 | 是 | 女 | 150.00 | 70.00  | 150.00 | 80.00  |
| 78 | 否 | 否 | 是 | 女 | 110.00 | 68.00  | 122.00 | 72.00  |
| 74 | 否 | 否 | 是 | 女 | 134.00 | 84.00  | 137.00 | 81.00  |
| 77 | 否 | 否 | 是 | 女 | 100.00 | 60.00  | 104.00 | 62.00  |
| 67 | 是 | 否 | 是 | 女 | 140.00 | 88.00  | 138.00 | 88.00  |
| 76 | 是 | 否 | 是 | 女 | 135.00 | 79.00  | 138.00 | 80.00  |
| 84 | 是 | 否 | 是 | 女 | 116.00 | 68.00  | 120.00 | 72.00  |
| 88 | 是 | 否 | 是 | 女 | 139.00 | 67.00  | 138.00 | 72.00  |
| 73 | 是 | 否 | 是 | 女 | 142.00 | 84.00  | 144.00 | 89.00  |

|    |   |   |   |   |        |        |        |        |
|----|---|---|---|---|--------|--------|--------|--------|
| 68 | 是 | 否 | 是 | 女 | 132.00 | 81.00  | 130.00 | 80.00  |
| 75 | 否 | 否 | 是 | 女 | 110.00 | 70.00  | 108.00 | 68.00  |
| 78 | 否 | 否 | 是 | 女 | 138.00 | 66.00  | 140.00 | 65.00  |
| 83 | 是 | 否 | 是 | 女 | 144.00 | 89.00  | 150.00 | 90.00  |
| 78 | 是 | 否 | 是 | 女 | 158.00 | 87.00  | 162.00 | 92.00  |
| 77 | 否 | 否 | 是 | 女 | 110.00 | 70.00  | 106.00 | 68.00  |
| 68 | 是 | 否 | 是 | 女 | 133.00 | 71.00  | 136.00 | 74.00  |
| 75 | 是 | 否 | 是 | 女 | 120.00 | 68.00  | 126.00 | 70.00  |
| 72 | 否 | 否 | 是 | 女 | 140.00 | 75.00  | 140.00 | 80.00  |
| 80 | 是 | 否 | 是 | 女 | 134.00 | 86.00  | 138.00 | 88.00  |
| 76 | 是 | 否 | 是 | 女 | 124.00 | 70.00  | 128.00 | 74.00  |
| 73 | 是 | 否 | 是 | 女 | 126.00 | 78.00  | 130.00 | 80.00  |
| 75 | 是 | 否 | 是 | 女 | 195.00 | 100.00 | 200.00 | 120.00 |
| 76 | 是 | 是 | 是 | 女 | 138.00 | 98.00  | 140.00 | 96.00  |
| 68 | 否 | 否 | 是 | 女 | 139.00 | 90.00  | 124.00 | 90.00  |
| 75 | 是 | 否 | 是 | 女 | 160.00 | 90.00  | 155.00 | 90.00  |
| 69 | 否 | 否 | 是 | 女 | 142.00 | 85.00  | 150.00 | 90.00  |
| 72 | 是 | 否 | 是 | 女 | 154.00 | 92.00  | 142.00 | 92.00  |
| 76 | 是 | 是 | 是 | 女 | 138.00 | 80.00  | 140.00 | 84.00  |
| 84 | 是 | 否 | 是 | 女 | 140.00 | 82.00  | 152.00 | 85.00  |
| 82 | 否 | 否 | 是 | 女 | 118.00 | 72.00  | 122.00 | 70.00  |
| 67 | 是 | 是 | 是 | 女 | 136.00 | 78.00  | 138.00 | 80.00  |
| 70 | 否 | 是 | 是 | 女 | 123.00 | 75.00  | 138.00 | 73.00  |
| 81 | 是 | 否 | 是 | 女 | 139.00 | 85.00  | 142.00 | 83.00  |
| 67 | 是 | 否 | 是 | 女 | 148.00 | 78.00  | 150.00 | 80.00  |
| 72 | 否 | 否 | 是 | 女 | 137.00 | 73.00  | 144.00 | 92.00  |
| 88 | 是 | 否 | 是 | 女 | 167.00 | 88.00  | 168.00 | 89.00  |
| 67 | 是 | 否 | 是 | 女 | 150.00 | 70.00  | 153.00 | 72.00  |
| 72 | 是 | 否 | 是 | 女 | 131.00 | 83.00  | 134.00 | 84.00  |
| 77 | 是 | 否 | 是 | 女 | 162.00 | 78.00  | 161.00 | 81.00  |
| 68 | 否 | 否 | 是 | 女 | 127.00 | 85.00  | 130.00 | 88.00  |
| 87 | 是 | 否 | 是 | 女 | 121.00 | 61.00  | 124.00 | 64.00  |
| 69 | 是 | 否 | 是 | 女 | 136.00 | 53.00  | 138.00 | 63.00  |
| 68 | 是 | 否 | 是 | 女 | 130.00 | 80.00  | 139.00 | 82.00  |
| 66 | 否 | 否 | 是 | 女 | 124.00 | 82.00  | 125.00 | 84.00  |
| 96 | 是 | 否 | 是 | 女 | 150.00 | 90.00  | 149.00 | 88.00  |
| 70 | 是 | 否 | 是 | 女 | 148.00 | 86.00  | 144.00 | 82.00  |
| 66 | 否 | 否 | 是 | 女 | 145.00 | 90.00  | 140.00 | 88.00  |
| 74 | 否 | 否 | 是 | 女 | 130.00 | 74.00  | 136.00 | 76.00  |
| 72 | 是 | 否 | 是 | 女 | 124.00 | 66.00  | 130.00 | 70.00  |
| 89 | 否 | 否 | 是 | 女 | 130.00 | 70.00  | 135.00 | 75.00  |
| 73 | 是 | 是 | 是 | 女 | 135.00 | 70.00  | 130.00 | 70.00  |
| 74 | 否 | 是 | 是 | 女 | 136.00 | 70.00  | 138.00 | 71.00  |
| 77 | 是 | 否 | 是 | 女 | 142.00 | 80.00  | 150.00 | 86.00  |
| 73 | 否 | 否 | 是 | 女 | 139.00 | 68.00  | 145.00 | 70.00  |
| 68 | 否 | 否 | 是 | 女 | 154.00 | 96.00  | 156.00 | 98.00  |
| 69 | 否 | 否 | 是 | 女 | 114.00 | 74.00  | 126.00 | 75.00  |
| 67 | 是 | 否 | 是 | 女 | 130.00 | 65.00  | 136.00 | 66.00  |
| 77 | 是 | 否 | 是 | 女 | 139.00 | 81.00  | 118.00 | 90.00  |
| 76 | 是 | 否 | 是 | 女 | 137.00 | 80.00  | 136.00 | 84.00  |
| 72 | 是 | 是 | 是 | 女 | 136.00 | 77.00  | 135.00 | 70.00  |

|    |   |   |   |   |        |       |        |        |
|----|---|---|---|---|--------|-------|--------|--------|
| 77 | 是 | 否 | 是 | 女 | 130.00 | 80.00 | 125.00 | 75.00  |
| 75 | 是 | 否 | 是 | 女 | 138.00 | 78.00 | 135.00 | 75.00  |
| 73 | 是 | 是 | 是 | 女 | 140.00 | 76.00 | 152.00 | 80.00  |
| 69 | 否 | 否 | 是 | 女 | 134.00 | 86.00 | 138.00 | 80.00  |
| 66 | 是 | 是 | 是 | 女 | 130.00 | 70.00 | 120.00 | 80.00  |
| 74 | 否 | 否 | 是 | 女 | 120.00 | 80.00 | 122.00 | 83.00  |
| 70 | 是 | 否 | 是 | 女 | 125.00 | 84.00 | 120.00 | 80.00  |
| 83 | 是 | 否 | 是 | 女 | 130.00 | 82.00 | 130.00 | 80.00  |
| 76 | 是 | 否 | 是 | 女 | 190.00 | 98.00 | 200.00 | 100.00 |
| 67 | 是 | 否 | 是 | 女 | 142.00 | 78.00 | 146.00 | 80.00  |
| 73 | 是 | 是 | 是 | 女 | 135.00 | 80.00 | 140.00 | 80.00  |
| 84 | 是 | 否 | 是 | 女 | 170.00 | 88.00 | 160.00 | 88.00  |
| 74 | 否 | 否 | 是 | 女 | 106.00 | 62.00 | 108.00 | 62.00  |
| 72 | 否 | 否 | 是 | 女 | 140.00 | 90.00 | 158.00 | 99.00  |
| 67 | 否 | 否 | 是 | 女 | 138.00 | 70.00 | 135.00 | 67.00  |
| 88 | 否 | 否 | 是 | 女 | 130.00 | 80.00 | 136.00 | 78.00  |
| 67 | 否 | 否 | 是 | 女 | 107.00 | 72.00 | 110.00 | 75.00  |
| 70 | 否 | 否 | 是 | 女 | 126.00 | 70.00 | 130.00 | 70.00  |
| 68 | 否 | 否 | 是 | 女 | 114.00 | 74.00 | 116.00 | 76.00  |
| 67 | 是 | 是 | 是 | 女 | 100.00 | 68.00 | 110.00 | 70.00  |
| 70 | 否 | 否 | 是 | 女 | 126.00 | 84.00 | 132.00 | 84.00  |
| 79 | 是 | 否 | 是 | 女 | 132.00 | 81.00 | 138.00 | 91.00  |
| 85 | 是 | 否 | 是 | 女 | 136.00 | 80.00 | 134.00 | 80.00  |
| 70 | 是 | 是 | 是 | 女 | 140.00 | 68.00 | 138.00 | 74.00  |
| 67 | 是 | 是 | 是 | 女 | 120.00 | 68.00 | 115.00 | 60.00  |
| 74 | 是 | 否 | 是 | 女 | 140.00 | 62.00 | 138.00 | 60.00  |
| 78 | 是 | 否 | 是 | 女 | 150.00 | 80.00 | 150.00 | 82.00  |
| 71 | 否 | 否 | 是 | 女 | 139.00 | 70.00 | 135.00 | 70.00  |
| 72 | 是 | 否 | 是 | 女 | 156.00 | 94.00 | 160.00 | 98.00  |
| 70 | 否 | 否 | 是 | 女 | 129.00 | 80.00 | 130.00 | 82.00  |
| 94 | 是 | 否 | 是 | 女 | 90.00  | 60.00 | 92.00  | 70.00  |
| 69 | 否 | 否 | 是 | 女 | 96.00  | 60.00 | 94.00  | 62.00  |
| 85 | 是 | 否 | 是 | 女 | 119.00 | 89.00 | 120.00 | 86.00  |
| 67 | 否 | 否 | 是 | 女 | 139.00 | 80.00 | 138.00 | 78.00  |
| 70 | 否 | 否 | 是 | 女 | 130.00 | 70.00 | 130.00 | 76.00  |
| 77 | 否 | 否 | 是 | 女 | 93.00  | 74.00 | 95.00  | 68.00  |
| 70 | 是 | 否 | 是 | 女 | 135.00 | 78.00 | 134.00 | 81.00  |
| 66 | 否 | 否 | 是 | 女 | 140.00 | 89.00 | 139.00 | 86.00  |
| 81 | 是 | 否 | 是 | 女 | 138.00 | 85.00 | 139.00 | 87.00  |
| 77 | 是 | 否 | 是 | 女 | 122.00 | 90.00 | 124.00 | 96.00  |
| 67 | 是 | 否 | 是 | 女 | 110.00 | 68.00 | 115.00 | 70.00  |
| 73 | 是 | 否 | 是 | 女 | 130.00 | 80.00 | 130.00 | 70.00  |
| 68 | 否 | 否 | 是 | 女 | 127.00 | 80.00 | 125.00 | 78.00  |
| 70 | 否 | 否 | 是 | 女 | 155.00 | 90.00 | 160.00 | 95.00  |
| 67 | 否 | 否 | 是 | 女 | 130.00 | 80.00 | 136.00 | 80.00  |
| 74 | 否 | 否 | 是 | 女 | 150.00 | 92.00 | 148.00 | 93.00  |
| 90 | 否 | 是 | 是 | 女 | 139.00 | 83.00 | 138.00 | 80.00  |
| 78 | 是 | 是 | 是 | 女 | 130.00 | 89.00 | 125.00 | 84.00  |
| 79 | 是 | 是 | 是 | 女 | 139.00 | 89.00 | 135.00 | 85.00  |
| 70 | 是 | 否 | 是 | 女 | 125.00 | 80.00 | 120.00 | 75.00  |
| 68 | 是 | 否 | 是 | 女 | 110.00 | 73.00 | 115.00 | 78.00  |

|    |    |   |   |   |        |        |        |        |
|----|----|---|---|---|--------|--------|--------|--------|
| 69 | 是  | 否 | 是 | 女 | 135.00 | 83.00  | 139.00 | 87.00  |
| 85 | 是否 | 否 | 是 | 女 | 111.00 | 79.00  | 114.00 | 82.00  |
| 73 | 是  | 否 | 是 | 女 | 122.00 | 62.00  | 120.00 | 60.00  |
| 70 | 是否 | 否 | 是 | 女 | 149.00 | 88.00  | 146.00 | 82.00  |
| 84 | 是  | 是 | 是 | 女 | 150.00 | 78.00  | 146.00 | 80.00  |
| 70 | 是  | 否 | 是 | 女 | 117.00 | 86.00  | 120.00 | 78.00  |
| 71 | 是  | 否 | 是 | 女 | 175.00 | 115.00 | 170.00 | 110.00 |
| 67 | 是  | 否 | 是 | 女 | 163.00 | 91.00  | 158.00 | 90.00  |
| 67 | 是否 | 否 | 是 | 女 | 110.00 | 70.00  | 115.00 | 70.00  |
| 79 | 是  | 否 | 是 | 女 | 130.00 | 70.00  | 125.00 | 65.00  |
| 87 | 是  | 否 | 是 | 女 | 120.00 | 80.00  | 122.00 | 80.00  |
| 67 | 是否 | 否 | 是 | 女 | 139.00 | 76.00  | 136.00 | 74.00  |
| 80 | 否  | 是 | 是 | 女 | 158.00 | 79.00  | 171.00 | 80.00  |
| 68 | 否  | 否 | 是 | 女 | 100.00 | 60.00  | 104.00 | 60.00  |
| 97 | 否  | 否 | 是 | 女 | 128.00 | 74.00  | 130.00 | 75.00  |
| 76 | 是  | 否 | 是 | 女 | 152.00 | 88.00  | 156.00 | 88.00  |
| 76 | 是  | 是 | 是 | 女 | 130.00 | 80.00  | 135.00 | 79.00  |
| 72 | 是  | 否 | 是 | 女 | 146.00 | 96.00  | 150.00 | 100.00 |
| 66 | 是  | 否 | 否 | 女 | 150.00 | 89.00  | 158.00 | 90.00  |
| 72 | 是  | 否 | 是 | 女 | 120.00 | 76.00  | 130.00 | 80.00  |
| 83 | 是  | 否 | 是 | 女 | 122.00 | 75.00  | 120.00 | 70.00  |
| 79 | 是否 | 否 | 是 | 女 | 138.00 | 62.00  | 134.00 | 68.00  |
| 70 | 是  | 否 | 是 | 女 | 143.00 | 88.00  | 145.00 | 89.00  |
| 70 | 是  | 是 | 是 | 女 | 140.00 | 78.00  | 146.00 | 80.00  |
| 73 | 是  | 是 | 是 | 女 | 142.00 | 90.00  | 144.00 | 100.00 |
| 67 | 是否 | 否 | 是 | 女 | 99.00  | 71.00  | 98.00  | 66.00  |
| 70 | 是  | 否 | 是 | 女 | 125.00 | 83.00  | 129.00 | 81.00  |
| 68 | 是否 | 否 | 是 | 女 | 140.00 | 82.00  | 138.00 | 84.00  |
| 75 | 否  | 否 | 是 | 女 | 130.00 | 70.00  | 126.00 | 78.00  |
| 68 | 是  | 否 | 是 | 女 | 120.00 | 80.00  | 123.00 | 68.00  |
| 69 | 是  | 否 | 是 | 女 | 176.00 | 96.00  | 180.00 | 100.00 |
| 82 | 是否 | 否 | 是 | 女 | 145.00 | 86.00  | 150.00 | 90.00  |
| 71 | 否  | 是 | 是 | 女 | 139.00 | 77.00  | 140.00 | 78.00  |
| 72 | 否  | 否 | 是 | 女 | 116.00 | 70.00  | 113.00 | 71.00  |
| 68 | 否  | 否 | 是 | 女 | 121.00 | 62.00  | 134.00 | 72.00  |
| 77 | 是  | 是 | 是 | 女 | 148.00 | 80.00  | 156.00 | 82.00  |
| 80 | 是  | 否 | 是 | 女 | 142.00 | 82.00  | 150.00 | 86.00  |
| 80 | 是  | 否 | 是 | 女 | 139.00 | 89.00  | 138.00 | 90.00  |
| 77 | 是否 | 否 | 是 | 女 | 130.00 | 70.00  | 140.00 | 80.00  |
| 69 | 否  | 否 | 是 | 女 | 135.00 | 86.00  | 138.00 | 89.00  |
| 79 | 否  | 否 | 是 | 女 | 110.00 | 70.00  | 120.00 | 80.00  |
| 69 | 是  | 否 | 是 | 女 | 149.00 | 90.00  | 150.00 | 89.00  |
| 75 | 是  | 是 | 是 | 女 | 131.00 | 83.00  | 130.00 | 80.00  |
| 71 | 是否 | 是 | 是 | 女 | 108.00 | 70.00  | 110.00 | 70.00  |
| 67 | 否  | 否 | 是 | 女 | 138.00 | 80.00  | 136.00 | 78.00  |
| 67 | 是  | 否 | 是 | 女 | 120.00 | 75.00  | 120.00 | 72.00  |
| 81 | 是否 | 是 | 是 | 女 | 131.00 | 81.00  | 135.00 | 85.00  |
| 67 | 否  | 否 | 是 | 女 | 139.00 | 87.00  | 139.00 | 88.00  |
| 68 | 否  | 否 | 是 | 女 | 110.00 | 60.00  | 110.00 | 66.00  |
| 69 | 是  | 否 | 是 | 女 | 165.00 | 85.00  | 170.00 | 90.00  |
| 74 | 是  | 是 | 是 | 女 | 135.00 | 75.00  | 140.00 | 70.00  |

|    |   |   |   |   |        |        |        |        |
|----|---|---|---|---|--------|--------|--------|--------|
| 68 | 是 | 否 | 是 | 女 | 135.00 | 85.00  | 140.00 | 96.00  |
| 67 | 是 | 否 | 是 | 女 | 132.00 | 86.00  | 130.00 | 85.00  |
| 71 | 是 | 否 | 是 | 女 | 138.00 | 78.00  | 158.00 | 80.00  |
| 67 | 否 | 否 | 是 | 女 | 130.00 | 80.00  | 139.00 | 85.00  |
| 69 | 是 | 是 | 是 | 女 | 172.00 | 100.00 | 172.00 | 97.00  |
| 73 | 否 | 否 | 是 | 女 | 130.00 | 75.00  | 134.00 | 78.00  |
| 74 | 否 | 否 | 是 | 女 | 132.00 | 66.00  | 136.00 | 70.00  |
| 66 | 是 | 是 | 是 | 女 | 118.00 | 78.00  | 122.00 | 80.00  |
| 84 | 是 | 否 | 是 | 女 | 152.00 | 80.00  | 154.00 | 94.00  |
| 86 | 否 | 否 | 是 | 女 | 139.00 | 89.00  | 140.00 | 90.00  |
| 71 | 否 | 否 | 是 | 女 | 120.00 | 66.00  | 125.00 | 70.00  |
| 77 | 是 | 否 | 是 | 女 | 130.00 | 82.00  | 135.00 | 85.00  |
| 73 | 是 | 否 | 是 | 女 | 125.00 | 84.00  | 130.00 | 70.00  |
| 76 | 否 | 否 | 是 | 女 | 153.00 | 98.00  | 141.00 | 92.00  |
| 69 | 否 | 是 | 是 | 女 | 118.00 | 78.00  | 122.00 | 80.00  |
| 70 | 否 | 否 | 是 | 女 | 126.00 | 76.00  | 130.00 | 78.00  |
| 68 | 是 | 否 | 是 | 女 | 145.00 | 80.00  | 150.00 | 82.00  |
| 67 | 是 | 否 | 是 | 女 | 100.00 | 60.00  | 104.00 | 60.00  |
| 69 | 否 | 否 | 是 | 女 | 120.00 | 68.00  | 128.00 | 68.00  |
| 72 | 是 | 否 | 是 | 女 | 120.00 | 70.00  | 128.00 | 70.00  |
| 78 | 是 | 否 | 是 | 女 | 138.00 | 90.00  | 140.00 | 90.00  |
| 75 | 是 | 否 | 是 | 女 | 125.00 | 70.00  | 136.00 | 70.00  |
| 79 | 否 | 否 | 是 | 女 | 130.00 | 89.00  | 132.00 | 92.00  |
| 85 | 否 | 否 | 是 | 女 | 136.00 | 80.00  | 140.00 | 86.00  |
| 84 | 否 | 否 | 是 | 女 | 143.00 | 78.00  | 143.00 | 79.00  |
| 70 | 否 | 否 | 是 | 女 | 138.00 | 70.00  | 146.00 | 74.00  |
| 66 | 否 | 否 | 是 | 女 | 100.00 | 60.00  | 110.00 | 70.00  |
| 67 | 是 | 否 | 是 | 女 | 132.00 | 80.00  | 135.00 | 83.00  |
| 74 | 否 | 是 | 是 | 女 | 121.00 | 70.00  | 128.00 | 71.00  |
| 69 | 否 | 否 | 是 | 女 | 120.00 | 72.00  | 126.00 | 80.00  |
| 69 | 是 | 是 | 是 | 女 | 140.00 | 80.00  | 144.00 | 82.00  |
| 77 | 否 | 否 | 是 | 女 | 136.00 | 80.00  | 130.00 | 82.00  |
| 77 | 否 | 否 | 是 | 女 | 170.00 | 90.00  | 162.00 | 90.00  |
| 88 | 是 | 是 | 是 | 女 | 155.00 | 90.00  | 168.00 | 96.00  |
| 81 | 否 | 否 | 是 | 女 | 104.00 | 68.00  | 108.00 | 68.00  |
| 75 | 否 | 否 | 是 | 女 | 140.00 | 84.00  | 150.00 | 88.00  |
| 70 | 否 | 否 | 是 | 女 | 150.00 | 98.00  | 163.00 | 106.00 |
| 68 | 是 | 否 | 是 | 女 | 120.00 | 80.00  | 124.00 | 86.00  |
| 66 | 是 | 是 | 是 | 女 | 130.00 | 80.00  | 136.00 | 72.00  |
| 70 | 否 | 否 | 是 | 女 | 132.00 | 98.00  | 130.00 | 100.00 |
| 75 | 否 | 否 | 是 | 女 | 136.00 | 88.00  | 140.00 | 88.00  |
| 88 | 是 | 否 | 是 | 女 | 150.00 | 79.00  | 134.00 | 77.00  |
| 75 | 否 | 否 | 是 | 女 | 139.00 | 85.00  | 140.00 | 81.00  |
| 68 | 否 | 否 | 是 | 女 | 116.00 | 78.00  | 120.00 | 80.00  |
| 66 | 否 | 否 | 否 | 女 | 130.00 | 82.00  | 136.00 | 88.00  |
| 68 | 是 | 否 | 是 | 女 | 125.00 | 70.00  | 130.00 | 75.00  |
| 69 | 否 | 否 | 是 | 女 | 90.00  | 60.00  | 90.00  | 60.00  |
| 72 | 是 | 是 | 是 | 女 | 150.00 | 80.00  | 153.00 | 82.00  |
| 74 | 是 | 否 | 是 | 女 | 130.00 | 82.00  | 135.00 | 73.00  |
| 79 | 否 | 否 | 是 | 女 | 90.00  | 60.00  | 92.00  | 65.00  |
| 67 | 否 | 否 | 是 | 女 | 138.00 | 86.00  | 142.00 | 88.00  |

|    |    |   |   |   |        |        |        |        |
|----|----|---|---|---|--------|--------|--------|--------|
| 69 | 是  | 否 | 是 | 女 | 120.00 | 68.00  | 127.00 | 70.00  |
| 67 | 是否 | 是 | 是 | 女 | 118.00 | 78.00  | 120.00 | 82.00  |
| 73 | 是  | 是 | 是 | 女 | 128.00 | 70.00  | 130.00 | 70.00  |
| 68 | 是  | 否 | 是 | 女 | 143.00 | 78.00  | 165.00 | 82.00  |
| 71 | 否  | 是 | 是 | 女 | 158.00 | 98.00  | 160.00 | 100.00 |
| 78 | 是  | 是 | 是 | 女 | 152.00 | 70.00  | 150.00 | 70.00  |
| 67 | 是  | 否 | 是 | 女 | 152.00 | 98.00  | 153.00 | 96.00  |
| 91 | 是  | 否 | 是 | 女 | 209.00 | 114.00 | 200.00 | 100.00 |
| 73 | 否  | 是 | 是 | 女 | 120.00 | 80.00  | 118.00 | 78.00  |
| 70 | 是  | 否 | 是 | 女 | 128.00 | 74.00  | 130.00 | 76.00  |
| 69 | 否  | 否 | 是 | 女 | 150.00 | 110.00 | 145.00 | 100.00 |
| 72 | 是  | 是 | 是 | 女 | 160.00 | 100.00 | 160.00 | 100.00 |
| 92 | 是  | 否 | 是 | 女 | 134.00 | 72.00  | 130.00 | 68.00  |
| 76 | 是  | 否 | 是 | 女 | 130.00 | 78.00  | 136.00 | 80.00  |
| 73 | 是  | 否 | 是 | 女 | 142.00 | 80.00  | 144.00 | 82.00  |
| 69 | 否  | 否 | 是 | 女 | 130.00 | 68.00  | 132.00 | 68.00  |
| 68 | 否  | 否 | 是 | 女 | 125.00 | 66.00  | 138.00 | 84.00  |
| 69 | 否  | 否 | 是 | 女 | 136.00 | 78.00  | 139.00 | 89.00  |
| 68 | 否  | 否 | 是 | 女 | 116.00 | 70.00  | 120.00 | 72.00  |
| 70 | 是  | 否 | 是 | 女 | 130.00 | 80.00  | 128.00 | 70.00  |
| 66 | 是  | 是 | 是 | 女 | 140.00 | 60.00  | 135.00 | 70.00  |
| 72 | 是  | 是 | 是 | 女 | 146.00 | 88.00  | 149.00 | 90.00  |
| 78 | 是  | 否 | 是 | 女 | 164.00 | 92.00  | 168.00 | 93.00  |
| 69 | 是  | 否 | 是 | 女 | 110.00 | 66.00  | 112.00 | 70.00  |
| 70 | 否  | 否 | 是 | 女 | 108.00 | 76.00  | 110.00 | 80.00  |
| 71 | 否  | 否 | 是 | 女 | 120.00 | 70.00  | 124.00 | 70.00  |
| 67 | 是  | 否 | 是 | 女 | 138.00 | 70.00  | 142.00 | 76.00  |
| 71 | 否  | 否 | 是 | 女 | 130.00 | 80.00  | 138.00 | 82.00  |
| 77 | 否  | 否 | 是 | 女 | 130.00 | 82.00  | 135.00 | 80.00  |
| 76 | 是  | 否 | 是 | 女 | 135.00 | 75.00  | 138.00 | 80.00  |
| 99 | 是  | 否 | 是 | 女 | 103.00 | 72.00  | 105.00 | 70.00  |
| 79 | 是  | 否 | 是 | 女 | 144.00 | 84.00  | 148.00 | 88.00  |
| 70 | 是  | 否 | 是 | 女 | 137.00 | 70.00  | 136.00 | 74.00  |
| 77 | 否  | 否 | 是 | 女 | 135.00 | 60.00  | 130.00 | 60.00  |
| 71 | 是  | 是 | 是 | 女 | 130.00 | 86.00  | 120.00 | 80.00  |
| 69 | 是  | 否 | 是 | 女 | 145.00 | 90.00  | 148.00 | 98.00  |
| 67 | 否  | 否 | 是 | 女 | 118.00 | 60.00  | 120.00 | 62.00  |
| 68 | 否  | 否 | 是 | 女 | 100.00 | 68.00  | 104.00 | 68.00  |
| 79 | 是  | 否 | 是 | 女 | 132.00 | 83.00  | 132.00 | 80.00  |
| 69 | 否  | 否 | 是 | 女 | 146.00 | 78.00  | 153.00 | 81.00  |
| 73 | 否  | 否 | 是 | 女 | 136.00 | 79.00  | 139.00 | 83.00  |
| 67 | 否  | 否 | 是 | 女 | 128.00 | 79.00  | 119.00 | 80.00  |
| 72 | 是  | 是 | 是 | 女 | 130.00 | 84.00  | 132.00 | 85.00  |
| 75 | 是  | 是 | 是 | 女 | 140.00 | 85.00  | 145.00 | 80.00  |
| 69 | 否  | 否 | 是 | 女 | 135.00 | 80.00  | 138.00 | 84.00  |
| 73 | 否  | 否 | 是 | 女 | 140.00 | 88.00  | 141.00 | 90.00  |
| 67 | 否  | 否 | 是 | 女 | 110.00 | 70.00  | 128.00 | 82.00  |
| 66 | 是  | 否 | 是 | 女 | 140.00 | 82.00  | 148.00 | 82.00  |
| 72 | 是  | 否 | 是 | 女 | 142.00 | 85.00  | 140.00 | 76.00  |
| 84 | 是  | 否 | 是 | 女 | 146.00 | 84.00  | 148.00 | 89.00  |
| 71 | 否  | 否 | 是 | 女 | 136.00 | 86.00  | 138.00 | 86.00  |

|    |   |   |   |   |        |       |        |        |
|----|---|---|---|---|--------|-------|--------|--------|
| 76 | 否 | 否 | 是 | 女 | 110.00 | 70.00 | 118.00 | 76.00  |
| 68 | 否 | 否 | 是 | 女 | 136.00 | 86.00 | 138.00 | 88.00  |
| 82 | 否 | 否 | 是 | 女 | 136.00 | 80.00 | 140.00 | 80.00  |
| 70 | 否 | 否 | 是 | 女 | 132.00 | 70.00 | 134.00 | 74.00  |
| 79 | 是 | 否 | 是 | 女 | 128.00 | 89.00 | 130.00 | 90.00  |
| 79 | 是 | 否 | 是 | 女 | 130.00 | 76.00 | 135.00 | 78.00  |
| 67 | 是 | 是 | 是 | 女 | 140.00 | 80.00 | 140.00 | 80.00  |
| 67 | 否 | 是 | 是 | 女 | 118.00 | 82.00 | 120.00 | 83.00  |
| 85 | 是 | 否 | 是 | 女 | 128.00 | 68.00 | 130.00 | 68.00  |
| 67 | 否 | 否 | 是 | 女 | 128.00 | 69.00 | 139.00 | 72.00  |
| 89 | 否 | 否 | 是 | 女 | 145.00 | 78.00 | 142.00 | 70.00  |
| 86 | 是 | 否 | 是 | 女 | 141.00 | 61.00 | 138.00 | 70.00  |
| 66 | 是 | 是 | 是 | 女 | 130.00 | 70.00 | 132.00 | 71.00  |
| 77 | 是 | 否 | 是 | 女 | 150.00 | 92.00 | 154.00 | 94.00  |
| 84 | 否 | 否 | 是 | 女 | 120.00 | 72.00 | 130.00 | 80.00  |
| 72 | 否 | 否 | 是 | 女 | 130.00 | 70.00 | 135.00 | 80.00  |
| 69 | 否 | 否 | 是 | 女 | 120.00 | 70.00 | 125.00 | 72.00  |
| 70 | 否 | 否 | 是 | 女 | 130.00 | 70.00 | 134.00 | 74.00  |
| 80 | 否 | 否 | 是 | 女 | 140.00 | 90.00 | 140.00 | 90.00  |
| 99 | 是 | 是 | 是 | 女 | 151.00 | 84.00 | 149.00 | 85.00  |
| 90 | 是 | 否 | 是 | 女 | 140.00 | 80.00 | 139.00 | 78.00  |
| 71 | 是 | 否 | 是 | 女 | 130.00 | 80.00 | 144.00 | 82.00  |
| 69 | 是 | 否 | 是 | 女 | 140.00 | 90.00 | 140.00 | 90.00  |
| 68 | 否 | 否 | 是 | 女 | 150.00 | 80.00 | 140.00 | 84.00  |
| 73 | 否 | 否 | 是 | 女 | 100.00 | 60.00 | 105.00 | 62.00  |
| 75 | 是 | 否 | 是 | 女 | 120.00 | 87.00 | 130.00 | 88.00  |
| 93 | 是 | 否 | 是 | 女 | 122.00 | 86.00 | 130.00 | 80.00  |
| 72 | 是 | 否 | 是 | 女 | 140.00 | 80.00 | 130.00 | 82.00  |
| 69 | 是 | 否 | 是 | 女 | 135.00 | 72.00 | 138.00 | 75.00  |
| 71 | 是 | 是 | 是 | 女 | 142.00 | 88.00 | 141.00 | 80.00  |
| 68 | 是 | 否 | 是 | 女 | 130.00 | 80.00 | 135.00 | 88.00  |
| 68 | 否 | 否 | 是 | 女 | 136.00 | 90.00 | 140.00 | 90.00  |
| 97 | 是 | 否 | 是 | 女 | 146.00 | 82.00 | 140.00 | 80.00  |
| 74 | 否 | 否 | 是 | 女 | 137.00 | 71.00 | 139.00 | 83.00  |
| 96 | 否 | 否 | 是 | 女 | 127.00 | 67.00 | 130.00 | 70.00  |
| 72 | 是 | 否 | 是 | 女 | 155.00 | 90.00 | 160.00 | 100.00 |
| 67 | 是 | 否 | 是 | 女 | 152.00 | 92.00 | 150.00 | 89.00  |
| 83 | 是 | 是 | 是 | 女 | 100.00 | 62.00 | 102.00 | 64.00  |
| 73 | 否 | 否 | 是 | 女 | 130.00 | 80.00 | 135.00 | 82.00  |
| 66 | 否 | 否 | 否 | 女 | 130.00 | 85.00 | 132.00 | 87.00  |
| 73 | 否 | 否 | 是 | 女 | 130.00 | 80.00 | 135.00 | 86.00  |
| 89 | 是 | 否 | 是 | 女 | 135.00 | 82.00 | 138.00 | 88.00  |
| 68 | 否 | 否 | 是 | 女 | 120.00 | 70.00 | 121.00 | 75.00  |
| 66 | 否 | 否 | 是 | 女 | 154.00 | 89.00 | 160.00 | 92.00  |
| 85 | 是 | 否 | 是 | 女 | 131.00 | 78.00 | 129.00 | 79.00  |
| 71 | 是 | 是 | 是 | 女 | 150.00 | 90.00 | 144.00 | 80.00  |
| 70 | 否 | 否 | 是 | 女 | 137.00 | 84.00 | 139.00 | 88.00  |
| 77 | 是 | 否 | 是 | 女 | 120.00 | 76.00 | 123.00 | 79.00  |
| 68 | 是 | 否 | 是 | 女 | 135.00 | 82.00 | 140.00 | 88.00  |
| 89 | 是 | 否 | 是 | 女 | 140.00 | 75.00 | 140.00 | 80.00  |
| 69 | 否 | 否 | 是 | 女 | 110.00 | 70.00 | 117.00 | 74.00  |

|    |   |   |   |   |        |        |        |        |
|----|---|---|---|---|--------|--------|--------|--------|
| 75 | 否 | 否 | 是 | 女 | 145.00 | 98.00  | 148.00 | 98.00  |
| 71 | 是 | 否 | 是 | 女 | 138.00 | 70.00  | 140.00 | 72.00  |
| 90 | 是 | 否 | 是 | 女 | 120.00 | 60.00  | 122.00 | 63.00  |
| 69 | 是 | 否 | 是 | 女 | 130.00 | 80.00  | 133.00 | 98.00  |
| 70 | 否 | 否 | 是 | 女 | 140.00 | 80.00  | 136.00 | 78.00  |
| 95 | 否 | 是 | 是 | 女 | 126.00 | 70.00  | 132.00 | 74.00  |
| 89 | 是 | 否 | 是 | 女 | 140.00 | 89.00  | 142.00 | 86.00  |
| 67 | 否 | 否 | 是 | 女 | 160.00 | 92.00  | 162.00 | 92.00  |
| 72 | 是 | 否 | 是 | 女 | 134.00 | 80.00  | 139.00 | 74.00  |
| 69 | 是 | 否 | 是 | 女 | 137.00 | 84.00  | 139.00 | 80.00  |
| 74 | 是 | 是 | 是 | 女 | 142.00 | 82.00  | 140.00 | 80.00  |
| 73 | 否 | 否 | 是 | 女 | 130.00 | 70.00  | 138.00 | 76.00  |
| 70 | 是 | 否 | 是 | 女 | 138.00 | 88.00  | 127.00 | 86.00  |
| 66 | 是 | 是 | 是 | 女 | 154.00 | 86.00  | 160.00 | 90.00  |
| 70 | 否 | 是 | 是 | 女 | 135.00 | 86.00  | 139.00 | 89.00  |
| 70 | 否 | 否 | 是 | 女 | 125.00 | 76.00  | 130.00 | 82.00  |
| 77 | 是 | 否 | 是 | 女 | 145.00 | 72.00  | 128.00 | 75.00  |
| 71 | 是 | 否 | 是 | 女 | 132.00 | 70.00  | 130.00 | 68.00  |
| 82 | 是 | 否 | 是 | 女 | 130.00 | 80.00  | 135.00 | 85.00  |
| 68 | 否 | 否 | 是 | 女 | 120.00 | 70.00  | 122.00 | 74.00  |
| 67 | 是 | 否 | 是 | 女 | 156.00 | 88.00  | 160.00 | 90.00  |
| 70 | 是 | 否 | 是 | 女 | 130.00 | 60.00  | 135.00 | 70.00  |
| 74 | 是 | 是 | 是 | 女 | 120.00 | 70.00  | 120.00 | 77.00  |
| 83 | 是 | 否 | 是 | 女 | 140.00 | 81.00  | 139.00 | 74.00  |
| 72 | 是 | 否 | 是 | 女 | 120.00 | 80.00  | 118.00 | 60.00  |
| 66 | 是 | 否 | 是 | 女 | 135.00 | 92.00  | 139.00 | 90.00  |
| 69 | 否 | 否 | 是 | 女 | 130.00 | 70.00  | 139.00 | 85.00  |
| 77 | 是 | 否 | 是 | 女 | 130.00 | 71.00  | 132.00 | 72.00  |
| 66 | 是 | 否 | 否 | 女 | 139.00 | 89.00  | 135.00 | 85.00  |
| 72 | 是 | 是 | 是 | 女 | 144.00 | 78.00  | 150.00 | 80.00  |
| 75 | 否 | 是 | 是 | 女 | 120.00 | 60.00  | 115.00 | 70.00  |
| 68 | 是 | 否 | 是 | 女 | 135.00 | 86.00  | 139.00 | 89.00  |
| 92 | 是 | 否 | 是 | 女 | 100.00 | 68.00  | 102.00 | 70.00  |
| 81 | 是 | 否 | 是 | 女 | 120.00 | 70.00  | 126.00 | 86.00  |
| 70 | 否 | 否 | 是 | 女 | 120.00 | 80.00  | 125.00 | 81.00  |
| 67 | 是 | 否 | 是 | 女 | 142.00 | 82.00  | 142.00 | 83.00  |
| 71 | 否 | 否 | 是 | 女 | 139.00 | 87.00  | 137.00 | 88.00  |
| 70 | 否 | 否 | 是 | 女 | 110.00 | 70.00  | 115.00 | 75.00  |
| 66 | 是 | 否 | 是 | 女 | 128.00 | 65.00  | 130.00 | 70.00  |
| 68 | 是 | 否 | 是 | 女 | 120.00 | 80.00  | 122.00 | 82.00  |
| 80 | 是 | 否 | 是 | 女 | 138.00 | 62.00  | 138.00 | 64.00  |
| 80 | 是 | 否 | 是 | 女 | 125.00 | 80.00  | 113.00 | 77.00  |
| 69 | 是 | 是 | 是 | 女 | 129.00 | 80.00  | 137.00 | 84.00  |
| 73 | 否 | 否 | 是 | 女 | 140.00 | 90.00  | 140.00 | 96.00  |
| 68 | 否 | 否 | 是 | 女 | 170.00 | 100.00 | 180.00 | 90.00  |
| 72 | 是 | 否 | 是 | 女 | 160.00 | 89.00  | 162.00 | 90.00  |
| 71 | 否 | 是 | 是 | 女 | 123.00 | 74.00  | 130.00 | 80.00  |
| 68 | 是 | 否 | 是 | 女 | 120.00 | 88.00  | 125.00 | 89.00  |
| 68 | 否 | 否 | 是 | 女 | 164.00 | 104.00 | 163.00 | 106.00 |
| 67 | 是 | 否 | 是 | 女 | 127.00 | 64.00  | 139.00 | 66.00  |
| 69 | 是 | 是 | 是 | 女 | 120.00 | 80.00  | 121.00 | 81.00  |

|    |   |   |   |   |        |        |        |        |
|----|---|---|---|---|--------|--------|--------|--------|
| 73 | 是 | 否 | 是 | 女 | 138.00 | 86.00  | 148.00 | 97.00  |
| 66 | 是 | 否 | 是 | 女 | 125.00 | 70.00  | 130.00 | 70.00  |
| 67 | 否 | 否 | 是 | 女 | 161.00 | 105.00 | 176.00 | 102.00 |
| 86 | 是 | 是 | 是 | 女 | 140.00 | 70.00  | 138.00 | 70.00  |
| 71 | 是 | 否 | 是 | 女 | 180.00 | 110.00 | 182.00 | 114.00 |
| 67 | 是 | 是 | 是 | 女 | 145.00 | 80.00  | 145.00 | 83.00  |
| 90 | 是 | 否 | 是 | 女 | 126.00 | 78.00  | 130.00 | 82.00  |
| 71 | 是 | 否 | 是 | 女 | 164.00 | 80.00  | 168.00 | 82.00  |
| 83 | 是 | 否 | 是 | 女 | 135.00 | 78.00  | 139.00 | 82.00  |
| 89 | 是 | 否 | 是 | 女 | 160.00 | 80.00  | 150.00 | 70.00  |
| 73 | 否 | 否 | 是 | 女 | 150.00 | 89.00  | 150.00 | 89.00  |
| 77 | 是 | 是 | 是 | 女 | 138.00 | 70.00  | 136.00 | 74.00  |
| 73 | 是 | 是 | 是 | 女 | 128.00 | 70.00  | 130.00 | 70.00  |
| 82 | 是 | 是 | 是 | 女 | 140.00 | 80.00  | 143.00 | 81.00  |
| 76 | 否 | 否 | 是 | 女 | 148.00 | 80.00  | 150.00 | 82.00  |
| 81 | 是 | 否 | 是 | 女 | 160.00 | 92.00  | 162.00 | 94.00  |
| 66 | 否 | 否 | 是 | 女 | 146.00 | 78.00  | 144.00 | 76.00  |
| 72 | 是 | 否 | 是 | 女 | 134.00 | 80.00  | 130.00 | 78.00  |
| 78 | 否 | 否 | 是 | 女 | 124.00 | 74.00  | 130.00 | 74.00  |
| 81 | 是 | 否 | 是 | 女 | 136.00 | 84.00  | 138.00 | 86.00  |
| 81 | 是 | 否 | 是 | 女 | 138.00 | 90.00  | 140.00 | 77.00  |
| 74 | 否 | 否 | 是 | 女 | 136.00 | 84.00  | 138.00 | 86.00  |
| 75 | 否 | 否 | 是 | 女 | 116.00 | 70.00  | 120.00 | 74.00  |
| 71 | 是 | 否 | 是 | 女 | 130.00 | 80.00  | 136.00 | 84.00  |
| 73 | 否 | 否 | 是 | 女 | 167.00 | 92.00  | 177.00 | 90.00  |
| 87 | 是 | 否 | 是 | 女 | 138.00 | 60.00  | 144.00 | 65.00  |
| 74 | 否 | 否 | 是 | 女 | 130.00 | 80.00  | 132.00 | 82.00  |
| 70 | 否 | 否 | 是 | 女 | 130.00 | 80.00  | 135.00 | 82.00  |
| 72 | 是 | 否 | 是 | 女 | 170.00 | 90.00  | 170.00 | 100.00 |
| 70 | 是 | 是 | 是 | 女 | 138.00 | 80.00  | 140.00 | 82.00  |
| 72 | 否 | 否 | 是 | 女 | 136.00 | 79.00  | 130.00 | 77.00  |
| 74 | 是 | 否 | 是 | 女 | 160.00 | 80.00  | 162.00 | 80.00  |
| 82 | 是 | 否 | 是 | 女 | 135.00 | 80.00  | 142.00 | 82.00  |
| 68 | 是 | 否 | 是 | 女 | 136.00 | 80.00  | 140.00 | 84.00  |
| 72 | 否 | 否 | 是 | 女 | 110.00 | 69.00  | 133.00 | 60.00  |
| 68 | 否 | 否 | 是 | 女 | 109.00 | 70.00  | 114.00 | 75.00  |
| 66 | 否 | 否 | 是 | 女 | 138.00 | 80.00  | 140.00 | 80.00  |
| 71 | 否 | 否 | 是 | 女 | 120.00 | 60.00  | 125.00 | 65.00  |
| 75 | 否 | 否 | 是 | 女 | 132.00 | 84.00  | 130.00 | 82.00  |
| 69 | 是 | 是 | 是 | 女 | 138.00 | 85.00  | 136.00 | 82.00  |
| 78 | 是 | 否 | 是 | 女 | 140.00 | 80.00  | 142.00 | 86.00  |
| 77 | 否 | 否 | 是 | 女 | 132.00 | 90.00  | 130.00 | 90.00  |
| 68 | 是 | 否 | 是 | 女 | 178.00 | 99.00  | 180.00 | 98.00  |
| 69 | 否 | 否 | 是 | 女 | 106.00 | 70.00  | 118.00 | 70.00  |
| 67 | 是 | 否 | 是 | 女 | 168.00 | 100.00 | 162.00 | 100.00 |
| 70 | 否 | 否 | 是 | 女 | 130.00 | 90.00  | 135.00 | 75.00  |
| 86 | 是 | 否 | 是 | 女 | 145.00 | 75.00  | 150.00 | 80.00  |
| 73 | 是 | 否 | 是 | 女 | 150.00 | 90.00  | 146.00 | 88.00  |
| 70 | 否 | 是 | 是 | 女 | 160.00 | 90.00  | 155.00 | 89.00  |
| 66 | 是 | 否 | 是 | 女 | 126.00 | 72.00  | 128.00 | 75.00  |
| 66 | 否 | 否 | 是 | 女 | 138.00 | 89.00  | 128.00 | 66.00  |

|    |   |   |   |   |        |        |        |        |
|----|---|---|---|---|--------|--------|--------|--------|
| 86 | 否 | 否 | 是 | 女 | 130.00 | 80.00  | 134.00 | 82.00  |
| 72 | 是 | 是 | 是 | 女 | 120.00 | 70.00  | 116.00 | 72.00  |
| 74 | 是 | 是 | 是 | 女 | 142.00 | 78.00  | 145.00 | 80.00  |
| 73 | 否 | 否 | 是 | 女 | 137.00 | 83.00  | 130.00 | 79.00  |
| 68 | 否 | 否 | 是 | 女 | 120.00 | 80.00  | 127.00 | 76.00  |
| 74 | 是 | 是 | 是 | 女 | 130.00 | 79.00  | 138.00 | 90.00  |
| 71 | 否 | 否 | 是 | 女 | 127.00 | 68.00  | 139.00 | 79.00  |
| 71 | 是 | 否 | 是 | 女 | 125.00 | 60.00  | 137.00 | 63.00  |
| 70 | 否 | 否 | 是 | 女 | 120.00 | 85.00  | 118.00 | 70.00  |
| 68 | 否 | 否 | 是 | 女 | 130.00 | 80.00  | 132.00 | 80.00  |
| 68 | 否 | 否 | 是 | 女 | 126.00 | 70.00  | 130.00 | 72.00  |
| 76 | 否 | 是 | 是 | 女 | 115.00 | 71.00  | 118.00 | 70.00  |
| 73 | 是 | 否 | 是 | 女 | 132.00 | 85.00  | 135.00 | 86.00  |
| 70 | 否 | 否 | 是 | 女 | 100.00 | 72.00  | 104.00 | 74.00  |
| 69 | 否 | 否 | 是 | 女 | 118.00 | 70.00  | 120.00 | 80.00  |
| 79 | 否 | 否 | 是 | 女 | 106.00 | 70.00  | 110.00 | 72.00  |
| 72 | 否 | 否 | 是 | 女 | 130.00 | 76.00  | 138.00 | 80.00  |
| 69 | 否 | 否 | 是 | 女 | 108.00 | 70.00  | 110.00 | 78.00  |
| 71 | 否 | 否 | 是 | 女 | 108.00 | 66.00  | 110.00 | 66.00  |
| 91 | 否 | 否 | 是 | 女 | 155.00 | 82.00  | 156.00 | 84.00  |
| 81 | 是 | 否 | 是 | 女 | 136.00 | 74.00  | 134.00 | 72.00  |
| 68 | 否 | 否 | 是 | 女 | 120.00 | 68.00  | 123.00 | 74.00  |
| 71 | 是 | 否 | 是 | 女 | 135.00 | 70.00  | 139.00 | 74.00  |
| 69 | 是 | 是 | 是 | 女 | 158.00 | 78.00  | 160.00 | 80.00  |
| 74 | 是 | 否 | 是 | 女 | 140.00 | 76.00  | 147.00 | 78.00  |
| 71 | 否 | 否 | 是 | 女 | 140.00 | 90.00  | 138.00 | 88.00  |
| 83 | 是 | 否 | 是 | 女 | 130.00 | 70.00  | 130.00 | 75.00  |
| 85 | 否 | 否 | 是 | 女 | 140.00 | 80.00  | 140.00 | 88.00  |
| 72 | 否 | 否 | 是 | 女 | 130.00 | 70.00  | 138.00 | 72.00  |
| 66 | 是 | 否 | 是 | 女 | 173.00 | 105.00 | 186.00 | 112.00 |
| 72 | 否 | 否 | 是 | 女 | 106.00 | 70.00  | 108.00 | 73.00  |
| 88 | 是 | 否 | 是 | 女 | 148.00 | 90.00  | 150.00 | 88.00  |
| 68 | 是 | 是 | 是 | 女 | 159.00 | 81.00  | 158.00 | 78.00  |
| 88 | 是 | 是 | 是 | 女 | 136.00 | 80.00  | 142.00 | 86.00  |
| 68 | 否 | 否 | 是 | 女 | 132.00 | 89.00  | 139.00 | 74.00  |
| 66 | 否 | 否 | 是 | 女 | 143.00 | 105.00 | 139.00 | 96.00  |
| 73 | 是 | 否 | 是 | 女 | 120.00 | 70.00  | 124.00 | 75.00  |
| 69 | 是 | 否 | 是 | 女 | 114.00 | 75.00  | 120.00 | 76.00  |
| 86 | 是 | 否 | 是 | 女 | 139.00 | 89.00  | 138.00 | 85.00  |
| 83 | 否 | 否 | 是 | 女 | 146.00 | 70.00  | 150.00 | 75.00  |
| 92 | 是 | 是 | 是 | 女 | 109.00 | 60.00  | 110.00 | 62.00  |
| 66 | 否 | 否 | 是 | 女 | 142.00 | 102.00 | 145.00 | 97.00  |
| 69 | 是 | 是 | 是 | 女 | 142.00 | 90.00  | 140.00 | 90.00  |
| 70 | 否 | 否 | 是 | 女 | 130.00 | 89.00  | 135.00 | 89.00  |
| 76 | 否 | 否 | 是 | 女 | 138.00 | 69.00  | 136.00 | 69.00  |
| 70 | 是 | 否 | 是 | 女 | 119.00 | 79.00  | 138.00 | 86.00  |
| 70 | 是 | 否 | 是 | 女 | 120.00 | 72.00  | 126.00 | 74.00  |
| 66 | 否 | 否 | 是 | 女 | 140.00 | 80.00  | 140.00 | 80.00  |
| 75 | 是 | 否 | 是 | 女 | 128.00 | 86.00  | 132.00 | 88.00  |
| 72 | 是 | 否 | 是 | 女 | 136.00 | 80.00  | 139.00 | 83.00  |
| 69 | 否 | 否 | 是 | 女 | 137.00 | 87.00  | 139.00 | 86.00  |

|    |   |   |   |   |        |       |        |        |
|----|---|---|---|---|--------|-------|--------|--------|
| 69 | 否 | 否 | 是 | 女 | 118.00 | 68.00 | 124.00 | 70.00  |
| 71 | 是 | 是 | 是 | 女 | 117.00 | 81.00 | 120.00 | 84.00  |
| 77 | 是 | 是 | 是 | 女 | 145.00 | 87.00 | 148.00 | 89.00  |
| 68 | 是 | 是 | 是 | 女 | 160.00 | 78.00 | 160.00 | 80.00  |
| 69 | 否 | 否 | 是 | 女 | 140.00 | 68.00 | 140.00 | 69.00  |
| 75 | 是 | 否 | 是 | 女 | 134.00 | 65.00 | 144.00 | 68.00  |
| 70 | 是 | 是 | 是 | 女 | 135.00 | 88.00 | 140.00 | 89.00  |
| 67 | 否 | 否 | 是 | 女 | 136.00 | 87.00 | 139.00 | 80.00  |
| 69 | 是 | 否 | 是 | 女 | 130.00 | 80.00 | 135.00 | 85.00  |
| 68 | 否 | 否 | 是 | 女 | 139.00 | 80.00 | 150.00 | 81.00  |
| 68 | 是 | 否 | 是 | 女 | 144.00 | 72.00 | 142.00 | 74.00  |
| 71 | 否 | 否 | 是 | 女 | 145.00 | 88.00 | 154.00 | 93.00  |
| 88 | 否 | 否 | 是 | 女 | 110.00 | 71.00 | 112.00 | 72.00  |
| 79 | 否 | 否 | 是 | 女 | 162.00 | 90.00 | 162.00 | 87.00  |
| 67 | 否 | 否 | 是 | 女 | 138.00 | 78.00 | 142.00 | 80.00  |
| 71 | 是 | 否 | 是 | 女 | 118.00 | 86.00 | 120.00 | 88.00  |
| 79 | 是 | 否 | 是 | 女 | 110.00 | 66.00 | 118.00 | 68.00  |
| 80 | 是 | 否 | 是 | 女 | 138.00 | 80.00 | 139.00 | 82.00  |
| 70 | 是 | 否 | 是 | 女 | 139.00 | 70.00 | 136.00 | 76.00  |
| 79 | 否 | 否 | 是 | 女 | 114.00 | 74.00 | 118.00 | 80.00  |
| 68 | 是 | 否 | 是 | 女 | 136.00 | 90.00 | 140.00 | 90.00  |
| 68 | 否 | 否 | 是 | 女 | 120.00 | 70.00 | 125.00 | 72.00  |
| 72 | 否 | 否 | 是 | 女 | 135.00 | 80.00 | 142.00 | 84.00  |
| 75 | 是 | 是 | 是 | 女 | 137.00 | 89.00 | 140.00 | 90.00  |
| 69 | 是 | 否 | 是 | 女 | 148.00 | 90.00 | 147.00 | 88.00  |
| 71 | 否 | 否 | 是 | 女 | 168.00 | 92.00 | 165.00 | 97.00  |
| 71 | 否 | 否 | 是 | 女 | 159.00 | 91.00 | 157.00 | 84.00  |
| 68 | 是 | 否 | 是 | 女 | 138.00 | 80.00 | 135.00 | 70.00  |
| 69 | 否 | 否 | 是 | 女 | 135.00 | 75.00 | 138.00 | 78.00  |
| 75 | 是 | 否 | 是 | 女 | 120.00 | 70.00 | 122.00 | 72.00  |
| 69 | 是 | 否 | 是 | 女 | 148.00 | 80.00 | 144.00 | 80.00  |
| 71 | 是 | 否 | 是 | 女 | 120.00 | 80.00 | 122.00 | 82.00  |
| 66 | 是 | 否 | 是 | 女 | 135.00 | 80.00 | 142.00 | 82.00  |
| 72 | 是 | 是 | 是 | 女 | 140.00 | 90.00 | 142.00 | 91.00  |
| 89 | 否 | 否 | 是 | 女 | 134.00 | 70.00 | 136.00 | 72.00  |
| 66 | 否 | 是 | 是 | 女 | 106.00 | 73.00 | 88.00  | 56.00  |
| 72 | 否 | 否 | 是 | 女 | 118.00 | 89.00 | 110.00 | 88.00  |
| 66 | 否 | 否 | 否 | 女 | 130.00 | 82.00 | 130.00 | 90.00  |
| 67 | 否 | 否 | 是 | 女 | 130.00 | 90.00 | 150.00 | 110.00 |
| 73 | 否 | 否 | 是 | 女 | 112.00 | 60.00 | 118.00 | 64.00  |
| 78 | 是 | 否 | 是 | 女 | 139.00 | 90.00 | 135.00 | 88.00  |
| 67 | 是 | 否 | 是 | 女 | 130.00 | 80.00 | 135.00 | 82.00  |
| 71 | 否 | 否 | 是 | 女 | 132.00 | 70.00 | 130.00 | 72.00  |
| 67 | 是 | 否 | 是 | 女 | 139.00 | 72.00 | 138.00 | 74.00  |
| 88 | 是 | 否 | 是 | 女 | 130.00 | 87.00 | 132.00 | 89.00  |
| 71 | 是 | 否 | 是 | 女 | 139.00 | 76.00 | 142.00 | 77.00  |
| 66 | 是 | 否 | 是 | 女 | 132.00 | 80.00 | 136.00 | 84.00  |
| 70 | 否 | 否 | 是 | 女 | 130.00 | 60.00 | 135.00 | 62.00  |
| 74 | 是 | 否 | 是 | 女 | 114.00 | 76.00 | 118.00 | 77.00  |
| 77 | 否 | 否 | 是 | 女 | 148.00 | 80.00 | 160.00 | 90.00  |
| 76 | 是 | 否 | 是 | 女 | 123.00 | 88.00 | 120.00 | 90.00  |

|    |   |   |   |   |        |       |        |        |
|----|---|---|---|---|--------|-------|--------|--------|
| 69 | 否 | 否 | 是 | 女 | 122.00 | 78.00 | 120.00 | 80.00  |
| 84 | 是 | 是 | 是 | 女 | 132.00 | 84.00 | 125.00 | 79.00  |
| 73 | 否 | 是 | 是 | 女 | 160.00 | 90.00 | 155.00 | 80.00  |
| 67 | 否 | 否 | 是 | 女 | 144.00 | 80.00 | 140.00 | 80.00  |
| 76 | 是 | 是 | 是 | 女 | 164.00 | 90.00 | 170.00 | 86.00  |
| 72 | 是 | 否 | 是 | 女 | 138.00 | 78.00 | 140.00 | 85.00  |
| 76 | 否 | 否 | 是 | 女 | 128.00 | 79.00 | 139.00 | 80.00  |
| 72 | 是 | 否 | 是 | 女 | 140.00 | 78.00 | 140.00 | 80.00  |
| 72 | 否 | 是 | 是 | 女 | 127.00 | 78.00 | 130.00 | 82.00  |
| 68 | 否 | 否 | 是 | 女 | 130.00 | 80.00 | 125.00 | 76.00  |
| 70 | 否 | 否 | 是 | 女 | 139.00 | 70.00 | 133.00 | 77.00  |
| 77 | 是 | 否 | 是 | 女 | 130.00 | 80.00 | 135.00 | 82.00  |
| 77 | 是 | 否 | 是 | 女 | 130.00 | 77.00 | 146.00 | 80.00  |
| 70 | 否 | 否 | 是 | 女 | 109.00 | 72.00 | 112.00 | 74.00  |
| 67 | 否 | 否 | 是 | 女 | 145.00 | 99.00 | 140.00 | 89.00  |
| 67 | 是 | 是 | 是 | 女 | 135.00 | 70.00 | 137.00 | 73.00  |
| 71 | 否 | 否 | 是 | 女 | 116.00 | 78.00 | 120.00 | 78.00  |
| 73 | 是 | 否 | 是 | 女 | 150.00 | 80.00 | 160.00 | 80.00  |
| 79 | 是 | 否 | 是 | 女 | 134.00 | 88.00 | 140.00 | 88.00  |
| 81 | 否 | 是 | 是 | 女 | 140.00 | 79.00 | 145.00 | 85.00  |
| 70 | 否 | 否 | 是 | 女 | 135.00 | 80.00 | 139.00 | 84.00  |
| 93 | 是 | 否 | 是 | 女 | 118.00 | 62.00 | 120.00 | 62.00  |
| 69 | 是 | 是 | 是 | 女 | 133.00 | 80.00 | 147.00 | 85.00  |
| 76 | 否 | 否 | 是 | 女 | 140.00 | 86.00 | 145.00 | 90.00  |
| 77 | 是 | 是 | 是 | 女 | 127.00 | 70.00 | 137.00 | 78.00  |
| 71 | 否 | 否 | 是 | 女 | 116.00 | 70.00 | 128.00 | 76.00  |
| 88 | 是 | 否 | 是 | 女 | 132.00 | 78.00 | 138.00 | 98.00  |
| 71 | 是 | 否 | 是 | 女 | 116.00 | 64.00 | 118.00 | 69.00  |
| 86 | 是 | 否 | 是 | 女 | 142.00 | 64.00 | 148.00 | 67.00  |
| 73 | 是 | 否 | 是 | 女 | 163.00 | 76.00 | 166.00 | 79.00  |
| 67 | 否 | 否 | 是 | 女 | 130.00 | 78.00 | 138.00 | 82.00  |
| 76 | 是 | 否 | 是 | 女 | 151.00 | 85.00 | 148.00 | 86.00  |
| 70 | 否 | 否 | 是 | 女 | 138.00 | 86.00 | 130.00 | 80.00  |
| 72 | 否 | 否 | 是 | 女 | 120.00 | 80.00 | 125.00 | 85.00  |
| 71 | 是 | 否 | 是 | 女 | 136.00 | 80.00 | 140.00 | 84.00  |
| 72 | 是 | 否 | 是 | 女 | 128.00 | 70.00 | 130.00 | 70.00  |
| 72 | 是 | 是 | 是 | 女 | 128.00 | 80.00 | 132.00 | 80.00  |
| 76 | 是 | 否 | 是 | 女 | 122.00 | 69.00 | 124.00 | 69.00  |
| 70 | 否 | 否 | 是 | 女 | 133.00 | 87.00 | 136.00 | 89.00  |
| 82 | 否 | 否 | 是 | 女 | 120.00 | 70.00 | 122.00 | 72.00  |
| 72 | 是 | 否 | 是 | 女 | 132.00 | 83.00 | 130.00 | 80.00  |
| 72 | 否 | 否 | 是 | 女 | 165.00 | 85.00 | 170.00 | 90.00  |
| 66 | 否 | 否 | 是 | 女 | 158.00 | 98.00 | 160.00 | 100.00 |
| 67 | 否 | 否 | 是 | 女 | 108.00 | 68.00 | 110.00 | 70.00  |
| 72 | 否 | 否 | 是 | 女 | 110.00 | 60.00 | 105.00 | 60.00  |
| 70 | 否 | 否 | 是 | 女 | 130.00 | 70.00 | 138.00 | 78.00  |
| 67 | 是 | 否 | 是 | 女 | 130.00 | 82.00 | 135.00 | 85.00  |
| 90 | 是 | 是 | 是 | 女 | 156.00 | 83.00 | 139.00 | 89.00  |
| 72 | 否 | 否 | 是 | 女 | 140.00 | 80.00 | 144.00 | 86.00  |
| 72 | 是 | 否 | 是 | 女 | 123.00 | 82.00 | 120.00 | 80.00  |
| 67 | 是 | 否 | 是 | 女 | 138.00 | 96.00 | 142.00 | 98.00  |

|    |   |   |   |   |        |        |        |        |
|----|---|---|---|---|--------|--------|--------|--------|
| 66 | 否 | 否 | 是 | 女 | 120.00 | 70.00  | 125.00 | 70.00  |
| 72 | 是 | 否 | 是 | 女 | 112.00 | 60.00  | 110.00 | 62.00  |
| 66 | 是 | 否 | 是 | 女 | 134.00 | 76.00  | 138.00 | 80.00  |
| 69 | 是 | 否 | 是 | 女 | 136.00 | 82.00  | 139.00 | 87.00  |
| 68 | 否 | 是 | 是 | 女 | 136.00 | 82.00  | 138.00 | 83.00  |
| 74 | 是 | 否 | 是 | 女 | 120.00 | 80.00  | 122.00 | 78.00  |
| 68 | 是 | 否 | 是 | 女 | 129.00 | 76.00  | 127.00 | 76.00  |
| 67 | 否 | 否 | 是 | 女 | 138.00 | 79.00  | 120.00 | 80.00  |
| 82 | 是 | 是 | 是 | 女 | 170.00 | 92.00  | 150.00 | 90.00  |
| 66 | 是 | 否 | 是 | 女 | 139.00 | 79.00  | 137.00 | 79.00  |
| 83 | 否 | 否 | 是 | 女 | 134.00 | 85.00  | 136.00 | 86.00  |
| 77 | 是 | 否 | 是 | 女 | 128.00 | 70.00  | 130.00 | 70.00  |
| 67 | 否 | 否 | 是 | 女 | 135.00 | 92.00  | 100.00 | 60.00  |
| 92 | 是 | 否 | 是 | 女 | 198.00 | 108.00 | 187.00 | 111.00 |
| 78 | 是 | 是 | 是 | 女 | 134.00 | 70.00  | 136.00 | 78.00  |
| 71 | 否 | 否 | 是 | 女 | 130.00 | 81.00  | 121.00 | 88.00  |
| 71 | 否 | 否 | 是 | 女 | 110.00 | 65.00  | 115.00 | 70.00  |
| 70 | 否 | 否 | 是 | 女 | 120.00 | 78.00  | 125.00 | 85.00  |
| 66 | 是 | 是 | 是 | 女 | 138.00 | 84.00  | 140.00 | 84.00  |
| 77 | 是 | 是 | 是 | 女 | 135.00 | 69.00  | 138.00 | 72.00  |
| 68 | 是 | 否 | 是 | 女 | 134.00 | 84.00  | 139.00 | 89.00  |
| 67 | 是 | 否 | 是 | 女 | 147.00 | 72.00  | 152.00 | 75.00  |
| 69 | 否 | 否 | 是 | 女 | 130.00 | 80.00  | 138.00 | 79.00  |
| 69 | 否 | 是 | 是 | 女 | 140.00 | 80.00  | 135.00 | 80.00  |
| 90 | 否 | 否 | 是 | 女 | 90.00  | 60.00  | 95.00  | 68.00  |
| 71 | 是 | 是 | 是 | 女 | 118.00 | 85.00  | 123.00 | 87.00  |
| 74 | 是 | 是 | 是 | 女 | 150.00 | 76.00  | 156.00 | 83.00  |
| 69 | 否 | 否 | 是 | 女 | 120.00 | 76.00  | 111.00 | 78.00  |
| 84 | 否 | 否 | 是 | 女 | 135.00 | 85.00  | 139.00 | 85.00  |
| 89 | 是 | 是 | 是 | 女 | 112.00 | 71.00  | 110.00 | 68.00  |
| 70 | 否 | 否 | 是 | 女 | 138.00 | 78.00  | 138.00 | 80.00  |
| 70 | 否 | 否 | 是 | 女 | 125.00 | 78.00  | 126.00 | 79.00  |
| 79 | 否 | 否 | 是 | 女 | 160.00 | 100.00 | 160.00 | 90.00  |
| 71 | 是 | 否 | 是 | 女 | 164.00 | 82.00  | 169.00 | 84.00  |
| 67 | 否 | 否 | 是 | 女 | 119.00 | 73.00  | 120.00 | 80.00  |
| 80 | 是 | 否 | 是 | 女 | 156.00 | 100.00 | 160.00 | 100.00 |
| 74 | 否 | 否 | 是 | 女 | 155.00 | 90.00  | 160.00 | 90.00  |
| 67 | 是 | 是 | 是 | 女 | 125.00 | 78.00  | 130.00 | 80.00  |
| 73 | 是 | 否 | 是 | 女 | 120.00 | 62.00  | 118.00 | 60.00  |
| 73 | 是 | 是 | 是 | 女 | 139.00 | 75.00  | 134.00 | 70.00  |
| 81 | 否 | 否 | 是 | 女 | 122.00 | 64.00  | 124.00 | 65.00  |
| 77 | 是 | 否 | 是 | 女 | 139.00 | 71.00  | 130.00 | 89.00  |
| 67 | 否 | 否 | 是 | 女 | 116.00 | 69.00  | 120.00 | 70.00  |
| 92 | 是 | 否 | 是 | 女 | 143.00 | 67.00  | 139.00 | 89.00  |
| 72 | 是 | 否 | 是 | 女 | 130.00 | 70.00  | 139.00 | 80.00  |
| 73 | 是 | 否 | 是 | 女 | 132.00 | 82.00  | 130.00 | 80.00  |
| 78 | 是 | 否 | 是 | 女 | 140.00 | 80.00  | 144.00 | 82.00  |
| 70 | 是 | 否 | 是 | 女 | 122.00 | 78.00  | 124.00 | 80.00  |
| 76 | 是 | 是 | 是 | 女 | 139.00 | 68.00  | 136.00 | 64.00  |
| 87 | 是 | 否 | 是 | 女 | 148.00 | 80.00  | 144.00 | 68.00  |
| 74 | 是 | 否 | 是 | 女 | 150.00 | 90.00  | 156.00 | 90.00  |

|    |   |   |   |   |        |        |        |        |
|----|---|---|---|---|--------|--------|--------|--------|
| 67 | 否 | 否 | 是 | 女 | 115.00 | 70.00  | 118.00 | 72.00  |
| 74 | 是 | 否 | 是 | 女 | 140.00 | 80.00  | 138.00 | 86.00  |
| 72 | 是 | 否 | 是 | 女 | 138.00 | 78.00  | 139.00 | 79.00  |
| 85 | 是 | 否 | 是 | 女 | 162.00 | 108.00 | 160.00 | 106.00 |
| 88 | 是 | 否 | 是 | 女 | 132.00 | 80.00  | 139.00 | 69.00  |
| 78 | 是 | 否 | 是 | 女 | 118.00 | 72.00  | 120.00 | 76.00  |
| 69 | 否 | 否 | 是 | 女 | 138.00 | 84.00  | 139.00 | 85.00  |
| 72 | 否 | 否 | 是 | 女 | 112.00 | 76.00  | 110.00 | 74.00  |
| 73 | 是 | 否 | 是 | 女 | 130.00 | 80.00  | 125.00 | 80.00  |
| 73 | 否 | 否 | 是 | 女 | 124.00 | 73.00  | 127.00 | 76.00  |
| 69 | 否 | 否 | 是 | 女 | 128.00 | 72.00  | 128.00 | 74.00  |
| 77 | 是 | 否 | 是 | 女 | 140.00 | 90.00  | 141.00 | 92.00  |
| 72 | 是 | 否 | 是 | 女 | 147.00 | 82.00  | 148.00 | 85.00  |
| 73 | 否 | 否 | 是 | 女 | 127.00 | 83.00  | 139.00 | 88.00  |
| 76 | 否 | 否 | 是 | 女 | 139.00 | 80.00  | 140.00 | 82.00  |
| 66 | 是 | 是 | 是 | 女 | 136.00 | 80.00  | 139.00 | 80.00  |
| 79 | 是 | 否 | 是 | 女 | 119.00 | 73.00  | 117.00 | 76.00  |
| 76 | 是 | 是 | 是 | 女 | 138.00 | 88.00  | 139.00 | 89.00  |
| 76 | 否 | 否 | 是 | 女 | 152.00 | 90.00  | 144.00 | 88.00  |
| 81 | 是 | 是 | 是 | 女 | 130.00 | 78.00  | 138.00 | 80.00  |
| 77 | 是 | 否 | 是 | 女 | 135.00 | 72.00  | 138.00 | 70.00  |
| 74 | 是 | 否 | 是 | 女 | 150.00 | 68.00  | 150.00 | 70.00  |
| 72 | 否 | 否 | 是 | 女 | 158.00 | 90.00  | 158.00 | 92.00  |
| 72 | 否 | 否 | 是 | 女 | 120.00 | 80.00  | 122.00 | 82.00  |
| 74 | 是 | 否 | 是 | 女 | 130.00 | 80.00  | 138.00 | 80.00  |
| 78 | 是 | 是 | 是 | 女 | 130.00 | 78.00  | 130.00 | 80.00  |
| 76 | 否 | 否 | 是 | 女 | 134.00 | 90.00  | 138.00 | 90.00  |
| 72 | 否 | 否 | 是 | 女 | 135.00 | 85.00  | 138.00 | 88.00  |
| 74 | 是 | 是 | 是 | 女 | 125.00 | 80.00  | 127.00 | 85.00  |
| 70 | 是 | 否 | 是 | 女 | 130.00 | 60.00  | 135.00 | 60.00  |
| 76 | 是 | 否 | 是 | 女 | 147.00 | 81.00  | 145.00 | 79.00  |
| 67 | 是 | 否 | 是 | 女 | 132.00 | 70.00  | 138.00 | 74.00  |
| 75 | 是 | 否 | 是 | 女 | 130.00 | 80.00  | 140.00 | 82.00  |
| 71 | 否 | 否 | 是 | 女 | 130.00 | 70.00  | 135.00 | 80.00  |
| 72 | 是 | 否 | 是 | 女 | 138.00 | 78.00  | 140.00 | 80.00  |
| 80 | 是 | 否 | 是 | 女 | 136.00 | 82.00  | 134.00 | 84.00  |
| 77 | 否 | 否 | 是 | 女 | 135.00 | 88.00  | 139.00 | 90.00  |
| 66 | 否 | 否 | 是 | 女 | 105.00 | 85.00  | 110.00 | 85.00  |
| 76 | 是 | 否 | 是 | 女 | 140.00 | 85.00  | 148.00 | 80.00  |
| 69 | 否 | 否 | 是 | 女 | 116.00 | 66.00  | 120.00 | 70.00  |
| 72 | 是 | 否 | 是 | 女 | 136.00 | 77.00  | 139.00 | 80.00  |
| 75 | 是 | 否 | 是 | 女 | 130.00 | 78.00  | 130.00 | 80.00  |
| 73 | 是 | 否 | 是 | 女 | 153.00 | 87.00  | 152.00 | 86.00  |
| 71 | 否 | 否 | 是 | 女 | 140.00 | 90.00  | 145.00 | 80.00  |
| 76 | 是 | 否 | 是 | 女 | 135.00 | 80.00  | 139.00 | 88.00  |
| 80 | 是 | 否 | 是 | 女 | 118.00 | 72.00  | 120.00 | 70.00  |
| 72 | 否 | 否 | 是 | 女 | 120.00 | 84.00  | 126.00 | 90.00  |
| 69 | 是 | 否 | 是 | 女 | 150.00 | 90.00  | 155.00 | 92.00  |
| 71 | 否 | 否 | 是 | 女 | 116.00 | 80.00  | 122.00 | 80.00  |
| 81 | 否 | 否 | 是 | 女 | 153.00 | 81.00  | 151.00 | 85.00  |
| 68 | 否 | 否 | 是 | 女 | 120.00 | 80.00  | 138.00 | 86.00  |

|    |   |   |   |   |        |        |        |       |
|----|---|---|---|---|--------|--------|--------|-------|
| 73 | 否 | 否 | 是 | 女 | 130.00 | 72.00  | 134.00 | 76.00 |
| 69 | 是 | 是 | 是 | 女 | 130.00 | 70.00  | 142.00 | 80.00 |
| 82 | 是 | 否 | 是 | 女 | 140.00 | 83.00  | 145.00 | 85.00 |
| 84 | 是 | 否 | 是 | 女 | 178.00 | 73.00  | 170.00 | 78.00 |
| 66 | 是 | 否 | 是 | 女 | 135.00 | 89.00  | 130.00 | 86.00 |
| 78 | 否 | 否 | 是 | 女 | 126.00 | 89.00  | 125.00 | 85.00 |
| 68 | 否 | 否 | 是 | 女 | 120.00 | 80.00  | 128.00 | 82.00 |
| 70 | 是 | 否 | 是 | 女 | 120.00 | 70.00  | 118.00 | 66.00 |
| 66 | 否 | 否 | 是 | 女 | 150.00 | 100.00 | 160.00 | 95.00 |
| 66 | 是 | 否 | 是 | 女 | 139.00 | 80.00  | 136.00 | 82.00 |
| 68 | 否 | 否 | 是 | 女 | 148.00 | 70.00  | 146.00 | 72.00 |
| 66 | 否 | 否 | 是 | 女 | 153.00 | 104.00 | 154.00 | 99.00 |
| 73 | 是 | 是 | 是 | 女 | 130.00 | 82.00  | 135.00 | 85.00 |
| 87 | 是 | 是 | 是 | 女 | 126.00 | 74.00  | 130.00 | 80.00 |
| 73 | 否 | 否 | 是 | 女 | 138.00 | 78.00  | 140.00 | 88.00 |
| 80 | 是 | 否 | 是 | 女 | 165.00 | 83.00  | 166.00 | 90.00 |
| 66 | 否 | 否 | 是 | 女 | 100.00 | 60.00  | 110.00 | 70.00 |
| 66 | 否 | 否 | 是 | 女 | 130.00 | 76.00  | 132.00 | 79.00 |
| 95 | 是 | 是 | 是 | 女 | 130.00 | 85.00  | 130.00 | 80.00 |
| 69 | 否 | 否 | 是 | 女 | 126.00 | 78.00  | 130.00 | 80.00 |
| 71 | 是 | 否 | 是 | 女 | 120.00 | 73.00  | 122.00 | 76.00 |
| 70 | 否 | 否 | 是 | 女 | 130.00 | 80.00  | 125.00 | 88.00 |
| 71 | 否 | 否 | 是 | 女 | 116.00 | 70.00  | 120.00 | 70.00 |
| 74 | 否 | 否 | 是 | 女 | 138.00 | 90.00  | 140.00 | 90.00 |
| 72 | 是 | 否 | 是 | 女 | 135.00 | 70.00  | 138.00 | 74.00 |
| 72 | 是 | 是 | 是 | 女 | 140.00 | 80.00  | 135.00 | 78.00 |
| 82 | 是 | 否 | 是 | 女 | 171.00 | 75.00  | 170.00 | 73.00 |
| 71 | 否 | 是 | 是 | 女 | 105.00 | 70.00  | 110.00 | 70.00 |
| 69 | 是 | 否 | 是 | 女 | 142.00 | 80.00  | 140.00 | 80.00 |
| 73 | 是 | 否 | 是 | 女 | 127.00 | 76.00  | 136.00 | 81.00 |
| 86 | 否 | 否 | 是 | 女 | 130.00 | 70.00  | 120.00 | 80.00 |
| 70 | 否 | 是 | 是 | 女 | 148.00 | 80.00  | 150.00 | 80.00 |
| 88 | 否 | 否 | 是 | 女 | 110.00 | 79.00  | 125.00 | 85.00 |
| 68 | 是 | 否 | 是 | 女 | 126.00 | 75.00  | 132.00 | 74.00 |
| 74 | 否 | 否 | 是 | 女 | 124.00 | 80.00  | 126.00 | 84.00 |
| 69 | 是 | 否 | 是 | 女 | 132.00 | 83.00  | 130.00 | 80.00 |
| 68 | 否 | 是 | 是 | 女 | 139.00 | 71.00  | 139.00 | 84.00 |
| 72 | 否 | 否 | 是 | 女 | 172.00 | 91.00  | 173.00 | 85.00 |
| 71 | 否 | 否 | 是 | 女 | 136.00 | 84.00  | 134.00 | 88.00 |
| 77 | 是 | 否 | 是 | 女 | 146.00 | 66.00  | 148.00 | 70.00 |
| 77 | 是 | 否 | 是 | 女 | 170.00 | 89.00  | 175.00 | 86.00 |
| 67 | 是 | 否 | 是 | 女 | 136.00 | 86.00  | 139.00 | 80.00 |
| 82 | 是 | 否 | 是 | 女 | 144.00 | 68.00  | 138.00 | 72.00 |
| 69 | 否 | 否 | 是 | 女 | 135.00 | 64.00  | 136.00 | 65.00 |
| 78 | 否 | 否 | 是 | 女 | 120.00 | 80.00  | 130.00 | 70.00 |
| 66 | 是 | 否 | 是 | 女 | 144.00 | 92.00  | 146.00 | 92.00 |
| 67 | 否 | 否 | 是 | 女 | 96.00  | 60.00  | 100.00 | 60.00 |
| 66 | 否 | 否 | 是 | 女 | 120.00 | 73.00  | 125.00 | 70.00 |
| 74 | 是 | 否 | 是 | 女 | 150.00 | 90.00  | 152.00 | 92.00 |
| 68 | 否 | 否 | 是 | 女 | 110.00 | 60.00  | 115.00 | 69.00 |
| 70 | 否 | 是 | 是 | 女 | 130.00 | 70.00  | 132.00 | 71.00 |

|    |   |   |   |   |        |       |        |        |
|----|---|---|---|---|--------|-------|--------|--------|
| 73 | 否 | 否 | 是 | 女 | 140.00 | 78.00 | 142.00 | 80.00  |
| 68 | 是 | 否 | 是 | 女 | 167.00 | 90.00 | 153.00 | 94.00  |
| 68 | 是 | 否 | 是 | 女 | 128.00 | 70.00 | 135.00 | 74.00  |
| 74 | 是 | 是 | 是 | 女 | 138.00 | 76.00 | 128.00 | 70.00  |
| 70 | 是 | 否 | 是 | 女 | 140.00 | 80.00 | 142.00 | 84.00  |
| 71 | 否 | 否 | 是 | 女 | 110.00 | 70.00 | 115.00 | 76.00  |
| 67 | 是 | 否 | 是 | 女 | 130.00 | 90.00 | 135.00 | 85.00  |
| 71 | 否 | 是 | 是 | 女 | 135.00 | 70.00 | 138.00 | 65.00  |
| 70 | 否 | 否 | 是 | 女 | 132.00 | 63.00 | 138.00 | 67.00  |
| 80 | 否 | 否 | 是 | 女 | 120.00 | 76.00 | 117.00 | 73.00  |
| 66 | 是 | 是 | 是 | 女 | 157.00 | 78.00 | 160.00 | 85.00  |
| 73 | 是 | 否 | 是 | 女 | 136.00 | 84.00 | 139.00 | 87.00  |
| 75 | 否 | 否 | 是 | 女 | 136.00 | 74.00 | 139.00 | 76.00  |
| 67 | 否 | 是 | 是 | 女 | 110.00 | 65.00 | 100.00 | 60.00  |
| 67 | 否 | 否 | 是 | 女 | 140.00 | 90.00 | 139.00 | 89.00  |
| 73 | 是 | 是 | 是 | 女 | 140.00 | 86.00 | 140.00 | 80.00  |
| 76 | 是 | 否 | 是 | 女 | 120.00 | 88.00 | 126.00 | 90.00  |
| 88 | 是 | 否 | 是 | 女 | 124.00 | 62.00 | 126.00 | 66.00  |
| 68 | 是 | 否 | 是 | 女 | 130.00 | 80.00 | 134.00 | 82.00  |
| 67 | 否 | 否 | 是 | 女 | 122.00 | 74.00 | 120.00 | 70.00  |
| 67 | 否 | 是 | 是 | 女 | 139.00 | 89.00 | 140.00 | 87.00  |
| 73 | 是 | 否 | 是 | 女 | 130.00 | 72.00 | 134.00 | 76.00  |
| 66 | 是 | 否 | 是 | 女 | 139.00 | 92.00 | 158.00 | 93.00  |
| 79 | 否 | 否 | 是 | 女 | 127.00 | 77.00 | 130.00 | 80.00  |
| 72 | 否 | 否 | 是 | 女 | 128.00 | 84.00 | 136.00 | 90.00  |
| 72 | 是 | 否 | 是 | 女 | 142.00 | 80.00 | 146.00 | 82.00  |
| 67 | 否 | 否 | 是 | 女 | 151.00 | 89.00 | 150.00 | 88.00  |
| 78 | 否 | 否 | 是 | 女 | 178.00 | 98.00 | 180.00 | 100.00 |
| 73 | 否 | 否 | 是 | 女 | 120.00 | 72.00 | 122.00 | 72.00  |
| 75 | 是 | 是 | 是 | 女 | 95.00  | 61.00 | 105.00 | 65.00  |
| 70 | 否 | 否 | 是 | 女 | 135.00 | 75.00 | 139.00 | 80.00  |
| 76 | 是 | 是 | 是 | 女 | 130.00 | 91.00 | 134.00 | 92.00  |
| 73 | 否 | 否 | 是 | 女 | 116.00 | 78.00 | 120.00 | 80.00  |
| 79 | 是 | 否 | 是 | 女 | 156.00 | 90.00 | 158.00 | 92.00  |
| 83 | 是 | 否 | 是 | 女 | 140.00 | 89.00 | 135.00 | 86.00  |
| 76 | 是 | 否 | 是 | 女 | 160.00 | 88.00 | 162.00 | 90.00  |
| 66 | 否 | 否 | 是 | 女 | 125.00 | 80.00 | 130.00 | 82.00  |
| 89 | 否 | 否 | 是 | 女 | 141.00 | 73.00 | 140.00 | 87.00  |
| 87 | 否 | 否 | 是 | 女 | 150.00 | 95.00 | 145.00 | 90.00  |
| 70 | 是 | 否 | 是 | 女 | 130.00 | 65.00 | 120.00 | 60.00  |
| 74 | 否 | 否 | 是 | 女 | 118.00 | 60.00 | 120.00 | 64.00  |
| 69 | 是 | 否 | 是 | 女 | 160.00 | 92.00 | 155.00 | 90.00  |
| 66 | 否 | 否 | 否 | 女 | 118.00 | 70.00 | 120.00 | 72.00  |
| 70 | 否 | 否 | 是 | 女 | 130.00 | 75.00 | 128.00 | 80.00  |
| 67 | 是 | 否 | 是 | 女 | 135.00 | 86.00 | 138.00 | 87.00  |
| 82 | 是 | 否 | 是 | 女 | 134.00 | 80.00 | 138.00 | 84.00  |
| 68 | 否 | 否 | 是 | 女 | 115.00 | 63.00 | 110.00 | 60.00  |
| 86 | 是 | 否 | 是 | 女 | 124.00 | 68.00 | 128.00 | 68.00  |
| 75 | 是 | 否 | 是 | 女 | 120.00 | 78.00 | 120.00 | 80.00  |
| 77 | 是 | 否 | 是 | 女 | 132.00 | 74.00 | 133.00 | 75.00  |
| 89 | 否 | 否 | 是 | 女 | 150.00 | 66.00 | 140.00 | 62.00  |

|    |    |   |   |   |        |       |        |        |
|----|----|---|---|---|--------|-------|--------|--------|
| 70 | 是  | 否 | 是 | 女 | 149.00 | 89.00 | 150.00 | 90.00  |
| 87 | 是否 | 否 | 是 | 女 | 129.00 | 84.00 | 130.00 | 80.00  |
| 75 | 否  | 否 | 是 | 女 | 120.00 | 70.00 | 125.00 | 68.00  |
| 70 | 否  | 是 | 是 | 女 | 110.00 | 70.00 | 112.00 | 75.00  |
| 68 | 否  | 是 | 是 | 女 | 127.00 | 78.00 | 139.00 | 83.00  |
| 78 | 是  | 是 | 是 | 女 | 136.00 | 70.00 | 140.00 | 70.00  |
| 75 | 是否 | 是 | 是 | 女 | 120.00 | 75.00 | 125.00 | 80.00  |
| 69 | 否  | 否 | 是 | 女 | 138.00 | 88.00 | 140.00 | 90.00  |
| 67 | 否  | 否 | 是 | 女 | 128.00 | 78.00 | 130.00 | 80.00  |
| 75 | 否  | 否 | 是 | 女 | 145.00 | 80.00 | 140.00 | 90.00  |
| 70 | 否  | 否 | 是 | 女 | 106.00 | 60.00 | 110.00 | 62.00  |
| 67 | 否  | 否 | 是 | 女 | 136.00 | 88.00 | 136.00 | 84.00  |
| 75 | 否  | 否 | 是 | 女 | 108.00 | 60.00 | 112.00 | 75.00  |
| 84 | 否  | 否 | 是 | 女 | 127.00 | 70.00 | 129.00 | 67.00  |
| 71 | 否  | 否 | 是 | 女 | 138.00 | 72.00 | 140.00 | 75.00  |
| 75 | 是  | 否 | 是 | 女 | 137.00 | 80.00 | 130.00 | 78.00  |
| 76 | 是否 | 否 | 是 | 女 | 90.00  | 60.00 | 91.00  | 65.00  |
| 72 | 是  | 否 | 是 | 女 | 116.00 | 62.00 | 118.00 | 62.00  |
| 75 | 是  | 否 | 是 | 女 | 120.00 | 70.00 | 128.00 | 70.00  |
| 69 | 是否 | 否 | 是 | 女 | 136.00 | 72.00 | 139.00 | 80.00  |
| 73 | 是  | 否 | 是 | 女 | 139.00 | 89.00 | 136.00 | 80.00  |
| 73 | 是  | 否 | 是 | 女 | 128.00 | 70.00 | 130.00 | 70.00  |
| 79 | 是  | 否 | 是 | 女 | 140.00 | 90.00 | 140.00 | 85.00  |
| 72 | 是否 | 否 | 是 | 女 | 146.00 | 98.00 | 150.00 | 100.00 |
| 78 | 否  | 否 | 是 | 女 | 115.00 | 82.00 | 120.00 | 85.00  |
| 70 | 是  | 是 | 是 | 女 | 167.00 | 92.00 | 171.00 | 90.00  |
| 75 | 是否 | 否 | 是 | 女 | 127.00 | 85.00 | 140.00 | 86.00  |
| 72 | 是  | 是 | 是 | 女 | 135.00 | 82.00 | 139.00 | 85.00  |
| 66 | 是否 | 否 | 是 | 女 | 110.00 | 78.00 | 112.00 | 78.00  |
| 72 | 是  | 是 | 是 | 女 | 140.00 | 88.00 | 153.00 | 90.00  |
| 77 | 是否 | 否 | 是 | 女 | 162.00 | 90.00 | 162.00 | 86.00  |
| 73 | 是  | 否 | 是 | 女 | 139.00 | 75.00 | 138.00 | 72.00  |
| 71 | 是  | 是 | 是 | 女 | 106.00 | 80.00 | 120.00 | 80.00  |
| 67 | 是否 | 否 | 是 | 女 | 127.00 | 88.00 | 130.00 | 84.00  |
| 87 | 是  | 否 | 是 | 女 | 140.00 | 67.00 | 160.00 | 84.00  |
| 71 | 是  | 是 | 是 | 女 | 154.00 | 81.00 | 156.00 | 92.00  |
| 83 | 是否 | 否 | 是 | 女 | 126.00 | 80.00 | 124.00 | 82.00  |
| 74 | 否  | 否 | 是 | 女 | 155.00 | 87.00 | 160.00 | 90.00  |
| 72 | 是  | 否 | 是 | 女 | 138.00 | 79.00 | 139.00 | 80.00  |
| 67 | 是否 | 否 | 是 | 女 | 154.00 | 90.00 | 158.00 | 96.00  |
| 89 | 否  | 否 | 是 | 女 | 140.00 | 80.00 | 142.00 | 85.00  |
| 68 | 否  | 否 | 是 | 女 | 118.00 | 68.00 | 122.00 | 70.00  |
| 66 | 是  | 是 | 是 | 女 | 110.00 | 68.00 | 118.00 | 74.00  |
| 69 | 是  | 是 | 是 | 女 | 100.00 | 60.00 | 115.00 | 70.00  |
| 70 | 是否 | 否 | 是 | 女 | 136.00 | 90.00 | 147.00 | 93.00  |
| 71 | 否  | 否 | 是 | 女 | 127.00 | 68.00 | 125.00 | 70.00  |
| 70 | 否  | 是 | 是 | 女 | 100.00 | 62.00 | 100.00 | 68.00  |
| 80 | 是  | 否 | 是 | 女 | 124.00 | 76.00 | 126.00 | 74.00  |
| 67 | 是否 | 否 | 是 | 女 | 114.00 | 70.00 | 120.00 | 80.00  |
| 84 | 是  | 否 | 是 | 女 | 160.00 | 95.00 | 170.00 | 94.00  |
| 78 | 是  | 否 | 是 | 女 | 145.00 | 75.00 | 151.00 | 78.00  |

|    |   |   |   |   |        |        |        |        |
|----|---|---|---|---|--------|--------|--------|--------|
| 74 | 是 | 是 | 是 | 女 | 162.00 | 98.00  | 159.00 | 92.00  |
| 70 | 是 | 否 | 是 | 女 | 116.00 | 74.00  | 120.00 | 80.00  |
| 78 | 是 | 否 | 是 | 女 | 136.00 | 60.00  | 138.00 | 60.00  |
| 85 | 否 | 否 | 是 | 女 | 105.00 | 74.00  | 100.00 | 71.00  |
| 68 | 否 | 否 | 是 | 女 | 129.00 | 76.00  | 132.00 | 79.00  |
| 72 | 否 | 否 | 是 | 女 | 139.00 | 80.00  | 138.00 | 80.00  |
| 74 | 是 | 否 | 是 | 女 | 132.00 | 74.00  | 136.00 | 80.00  |
| 83 | 否 | 否 | 是 | 女 | 140.00 | 80.00  | 132.00 | 78.00  |
| 74 | 否 | 否 | 是 | 女 | 130.00 | 78.00  | 132.00 | 78.00  |
| 70 | 是 | 否 | 是 | 女 | 136.00 | 77.00  | 138.00 | 79.00  |
| 69 | 否 | 否 | 是 | 女 | 114.00 | 78.00  | 115.00 | 80.00  |
| 73 | 否 | 否 | 是 | 女 | 163.00 | 100.00 | 165.00 | 100.00 |
| 70 | 是 | 否 | 是 | 女 | 130.00 | 80.00  | 140.00 | 90.00  |
| 80 | 否 | 否 | 是 | 女 | 120.00 | 89.00  | 125.00 | 91.00  |
| 70 | 是 | 否 | 是 | 女 | 130.00 | 70.00  | 135.00 | 86.00  |
| 73 | 是 | 否 | 是 | 女 | 140.00 | 85.00  | 139.00 | 87.00  |
| 69 | 是 | 否 | 是 | 女 | 140.00 | 85.00  | 152.00 | 90.00  |
| 70 | 是 | 是 | 是 | 女 | 150.00 | 90.00  | 150.00 | 88.00  |
| 76 | 否 | 否 | 是 | 女 | 118.00 | 80.00  | 120.00 | 80.00  |
| 73 | 否 | 是 | 是 | 女 | 110.00 | 70.00  | 116.00 | 70.00  |
| 68 | 否 | 否 | 是 | 女 | 120.00 | 72.00  | 118.00 | 72.00  |
| 95 | 否 | 否 | 是 | 女 | 172.00 | 80.00  | 174.00 | 82.00  |
| 71 | 是 | 是 | 是 | 女 | 120.00 | 80.00  | 121.00 | 86.00  |
| 90 | 是 | 是 | 是 | 女 | 108.00 | 60.00  | 108.00 | 62.00  |
| 73 | 是 | 否 | 是 | 女 | 135.00 | 72.00  | 138.00 | 77.00  |
| 84 | 是 | 否 | 是 | 女 | 127.00 | 75.00  | 130.00 | 70.00  |
| 74 | 否 | 否 | 是 | 女 | 110.00 | 62.00  | 110.00 | 60.00  |
| 71 | 否 | 否 | 是 | 女 | 135.00 | 70.00  | 144.00 | 72.00  |
| 66 | 否 | 否 | 是 | 女 | 138.00 | 80.00  | 133.00 | 75.00  |
| 76 | 是 | 否 | 是 | 女 | 142.00 | 66.00  | 140.00 | 68.00  |
| 74 | 否 | 否 | 是 | 女 | 146.00 | 88.00  | 148.00 | 90.00  |
| 67 | 是 | 否 | 是 | 女 | 126.00 | 70.00  | 139.00 | 79.00  |
| 82 | 否 | 否 | 是 | 女 | 130.00 | 78.00  | 139.00 | 80.00  |
| 71 | 否 | 否 | 是 | 女 | 120.00 | 78.00  | 122.00 | 76.00  |
| 81 | 是 | 是 | 是 | 女 | 132.00 | 82.00  | 123.00 | 76.00  |
| 73 | 否 | 否 | 是 | 女 | 120.00 | 72.00  | 122.00 | 70.00  |
| 70 | 是 | 否 | 是 | 女 | 142.00 | 76.00  | 144.00 | 75.00  |
| 74 | 否 | 否 | 是 | 女 | 114.00 | 70.00  | 120.00 | 80.00  |
| 68 | 是 | 是 | 是 | 女 | 126.00 | 60.00  | 120.00 | 70.00  |
| 67 | 是 | 是 | 是 | 女 | 129.00 | 70.00  | 139.00 | 74.00  |
| 69 | 是 | 否 | 是 | 女 | 139.00 | 82.00  | 132.00 | 80.00  |
| 68 | 是 | 否 | 是 | 女 | 150.00 | 70.00  | 152.00 | 72.00  |
| 75 | 是 | 否 | 是 | 女 | 140.00 | 70.00  | 150.00 | 70.00  |
| 67 | 否 | 否 | 是 | 女 | 100.00 | 70.00  | 102.00 | 68.00  |
| 67 | 是 | 否 | 是 | 女 | 140.00 | 73.00  | 139.00 | 79.00  |
| 69 | 否 | 否 | 是 | 女 | 130.00 | 80.00  | 139.00 | 78.00  |
| 67 | 否 | 否 | 是 | 女 | 139.00 | 84.00  | 139.00 | 89.00  |
| 72 | 是 | 否 | 是 | 女 | 138.00 | 80.00  | 140.00 | 74.00  |
| 75 | 是 | 否 | 是 | 女 | 138.00 | 80.00  | 136.00 | 78.00  |
| 67 | 是 | 否 | 是 | 女 | 138.00 | 78.00  | 137.00 | 72.00  |
| 70 | 否 | 否 | 是 | 女 | 108.00 | 67.00  | 106.00 | 69.00  |

|    |   |   |   |   |        |       |        |       |
|----|---|---|---|---|--------|-------|--------|-------|
| 70 | 否 | 是 | 是 | 女 | 130.00 | 80.00 | 133.00 | 80.00 |
| 77 | 是 | 否 | 是 | 女 | 150.00 | 72.00 | 155.00 | 78.00 |
| 82 | 是 | 否 | 是 | 女 | 135.00 | 80.00 | 138.00 | 82.00 |
| 85 | 否 | 否 | 是 | 女 | 130.00 | 80.00 | 135.00 | 80.00 |
| 68 | 是 | 否 | 是 | 女 | 127.00 | 76.00 | 126.00 | 84.00 |
| 74 | 是 | 否 | 是 | 女 | 110.00 | 70.00 | 108.00 | 68.00 |
| 71 | 否 | 否 | 是 | 女 | 110.00 | 72.00 | 108.00 | 70.00 |
| 77 | 是 | 否 | 是 | 女 | 141.00 | 81.00 | 142.00 | 80.00 |
| 67 | 否 | 否 | 是 | 女 | 157.00 | 94.00 | 145.00 | 90.00 |
| 80 | 是 | 否 | 是 | 女 | 141.00 | 90.00 | 140.00 | 90.00 |
| 68 | 是 | 是 | 是 | 女 | 130.00 | 76.00 | 139.00 | 74.00 |
| 67 | 是 | 否 | 是 | 女 | 120.00 | 78.00 | 125.00 | 82.00 |
| 67 | 否 | 否 | 是 | 女 | 106.00 | 66.00 | 110.00 | 70.00 |
| 68 | 否 | 否 | 是 | 女 | 138.00 | 89.00 | 139.00 | 85.00 |
| 66 | 否 | 是 | 是 | 女 | 118.00 | 70.00 | 120.00 | 74.00 |
| 69 | 否 | 是 | 是 | 女 | 130.00 | 89.00 | 128.00 | 78.00 |
| 76 | 是 | 否 | 是 | 女 | 130.00 | 80.00 | 142.00 | 82.00 |
| 67 | 否 | 否 | 是 | 女 | 110.00 | 70.00 | 105.00 | 65.00 |
| 75 | 是 | 否 | 是 | 女 | 145.00 | 80.00 | 140.00 | 70.00 |
| 70 | 否 | 否 | 是 | 女 | 130.00 | 76.00 | 128.00 | 74.00 |
| 66 | 否 | 否 | 是 | 女 | 139.00 | 84.00 | 137.00 | 82.00 |
| 74 | 是 | 否 | 是 | 女 | 120.00 | 80.00 | 115.00 | 75.00 |
| 66 | 否 | 否 | 是 | 女 | 130.00 | 80.00 | 135.00 | 82.00 |
| 69 | 是 | 否 | 是 | 女 | 148.00 | 84.00 | 148.00 | 86.00 |
| 71 | 是 | 否 | 是 | 女 | 146.00 | 70.00 | 148.00 | 75.00 |
| 76 | 否 | 否 | 是 | 女 | 132.00 | 92.00 | 133.00 | 97.00 |
| 75 | 是 | 否 | 是 | 女 | 139.00 | 89.00 | 132.00 | 80.00 |
| 87 | 是 | 否 | 是 | 女 | 148.00 | 62.00 | 150.00 | 70.00 |
| 73 | 否 | 否 | 是 | 女 | 164.00 | 85.00 | 166.00 | 84.00 |
| 89 | 否 | 否 | 是 | 女 | 120.00 | 66.00 | 122.00 | 70.00 |
| 76 | 是 | 是 | 是 | 女 | 152.00 | 76.00 | 156.00 | 80.00 |
| 70 | 是 | 否 | 是 | 女 | 146.00 | 88.00 | 142.00 | 81.00 |
| 88 | 是 | 否 | 是 | 女 | 172.00 | 84.00 | 174.00 | 89.00 |
| 74 | 否 | 否 | 是 | 女 | 110.00 | 75.00 | 120.00 | 80.00 |
| 70 | 否 | 否 | 是 | 女 | 131.00 | 71.00 | 121.00 | 72.00 |
| 70 | 否 | 否 | 是 | 女 | 110.00 | 60.00 | 110.00 | 62.00 |
| 75 | 否 | 否 | 是 | 女 | 126.00 | 76.00 | 128.00 | 78.00 |
| 75 | 否 | 否 | 是 | 女 | 114.00 | 66.00 | 118.00 | 70.00 |
| 78 | 否 | 否 | 是 | 女 | 132.00 | 84.00 | 136.00 | 88.00 |
| 96 | 否 | 否 | 是 | 女 | 122.00 | 75.00 | 125.00 | 78.00 |
| 73 | 否 | 否 | 是 | 女 | 130.00 | 80.00 | 138.00 | 88.00 |
| 73 | 否 | 否 | 是 | 女 | 102.00 | 66.00 | 104.00 | 64.00 |
| 67 | 是 | 否 | 是 | 女 | 128.00 | 78.00 | 130.00 | 81.00 |
| 71 | 是 | 是 | 是 | 女 | 146.00 | 73.00 | 135.00 | 71.00 |
| 71 | 否 | 否 | 是 | 女 | 155.00 | 80.00 | 152.00 | 78.00 |
| 73 | 是 | 否 | 是 | 女 | 150.00 | 80.00 | 148.00 | 80.00 |
| 78 | 是 | 否 | 是 | 女 | 118.00 | 60.00 | 120.00 | 65.00 |
| 79 | 否 | 是 | 是 | 女 | 127.00 | 65.00 | 120.00 | 63.00 |
| 67 | 是 | 是 | 是 | 女 | 100.00 | 70.00 | 106.00 | 78.00 |
| 79 | 否 | 否 | 是 | 女 | 119.00 | 68.00 | 120.00 | 68.00 |
| 74 | 是 | 是 | 是 | 女 | 164.00 | 80.00 | 166.00 | 80.00 |

|    |   |   |   |   |        |        |        |        |
|----|---|---|---|---|--------|--------|--------|--------|
| 87 | 是 | 否 | 是 | 女 | 130.00 | 70.00  | 138.00 | 80.00  |
| 70 | 是 | 否 | 是 | 女 | 145.00 | 93.00  | 148.00 | 98.00  |
| 85 | 是 | 否 | 是 | 女 | 156.00 | 88.00  | 154.00 | 80.00  |
| 74 | 是 | 否 | 是 | 女 | 132.00 | 60.00  | 135.00 | 70.00  |
| 79 | 否 | 否 | 是 | 女 | 108.00 | 60.00  | 110.00 | 60.00  |
| 72 | 是 | 否 | 是 | 女 | 130.00 | 66.00  | 132.00 | 68.00  |
| 84 | 是 | 否 | 是 | 女 | 128.00 | 72.00  | 130.00 | 74.00  |
| 70 | 是 | 是 | 是 | 女 | 130.00 | 70.00  | 139.00 | 75.00  |
| 70 | 是 | 否 | 是 | 女 | 125.00 | 70.00  | 120.00 | 65.00  |
| 77 | 是 | 否 | 是 | 女 | 138.00 | 76.00  | 142.00 | 78.00  |
| 71 | 是 | 否 | 是 | 女 | 130.00 | 60.00  | 135.00 | 60.00  |
| 76 | 是 | 是 | 是 | 女 | 128.00 | 72.00  | 130.00 | 70.00  |
| 66 | 是 | 是 | 是 | 女 | 128.00 | 80.00  | 130.00 | 83.00  |
| 78 | 是 | 否 | 是 | 女 | 138.00 | 83.00  | 140.00 | 85.00  |
| 79 | 是 | 否 | 是 | 女 | 139.00 | 74.00  | 151.00 | 71.00  |
| 70 | 是 | 否 | 是 | 女 | 120.00 | 80.00  | 130.00 | 74.00  |
| 68 | 否 | 否 | 是 | 女 | 140.00 | 80.00  | 140.00 | 80.00  |
| 81 | 是 | 是 | 是 | 女 | 132.00 | 70.00  | 136.00 | 76.00  |
| 74 | 否 | 否 | 是 | 女 | 127.00 | 84.00  | 126.00 | 90.00  |
| 67 | 是 | 否 | 是 | 女 | 126.00 | 72.00  | 139.00 | 80.00  |
| 68 | 否 | 否 | 是 | 女 | 115.00 | 72.00  | 120.00 | 75.00  |
| 88 | 否 | 是 | 是 | 女 | 130.00 | 80.00  | 128.00 | 81.00  |
| 73 | 是 | 否 | 是 | 女 | 120.00 | 80.00  | 124.00 | 88.00  |
| 87 | 是 | 否 | 是 | 女 | 130.00 | 72.00  | 132.00 | 76.00  |
| 74 | 否 | 否 | 是 | 女 | 116.00 | 70.00  | 128.00 | 73.00  |
| 66 | 否 | 否 | 是 | 女 | 125.00 | 66.00  | 130.00 | 68.00  |
| 71 | 是 | 是 | 是 | 女 | 122.00 | 70.00  | 118.00 | 66.00  |
| 68 | 是 | 否 | 是 | 女 | 160.00 | 100.00 | 164.00 | 104.00 |
| 78 | 否 | 是 | 是 | 女 | 145.00 | 82.00  | 150.00 | 80.00  |
| 72 | 否 | 否 | 是 | 女 | 130.00 | 80.00  | 136.00 | 82.00  |
| 67 | 是 | 是 | 是 | 女 | 120.00 | 65.00  | 120.00 | 70.00  |
| 80 | 是 | 否 | 是 | 女 | 150.00 | 70.00  | 152.00 | 69.00  |
| 75 | 否 | 否 | 是 | 女 | 138.00 | 72.00  | 139.00 | 82.00  |
| 70 | 是 | 否 | 是 | 女 | 160.00 | 90.00  | 170.00 | 94.00  |
| 72 | 否 | 否 | 是 | 女 | 132.00 | 82.00  | 135.00 | 82.00  |
| 78 | 是 | 是 | 是 | 女 | 158.00 | 87.00  | 156.00 | 83.00  |
| 75 | 是 | 否 | 是 | 女 | 136.00 | 70.00  | 139.00 | 71.00  |
| 89 | 是 | 否 | 是 | 女 | 129.00 | 88.00  | 130.00 | 80.00  |
| 68 | 否 | 否 | 是 | 女 | 130.00 | 74.00  | 128.00 | 76.00  |
| 66 | 否 | 否 | 是 | 女 | 132.00 | 80.00  | 136.00 | 84.00  |
| 66 | 是 | 是 | 是 | 女 | 152.00 | 100.00 | 155.00 | 102.00 |
| 73 | 否 | 否 | 是 | 女 | 132.00 | 80.00  | 142.00 | 82.00  |
| 76 | 是 | 否 | 是 | 女 | 96.00  | 60.00  | 98.00  | 62.00  |
| 70 | 是 | 是 | 是 | 女 | 135.00 | 82.00  | 138.00 | 88.00  |
| 75 | 否 | 否 | 是 | 女 | 125.00 | 78.00  | 130.00 | 82.00  |
| 71 | 是 | 否 | 是 | 女 | 145.00 | 95.00  | 148.00 | 90.00  |
| 66 | 是 | 否 | 否 | 女 | 134.00 | 76.00  | 138.00 | 80.00  |
| 72 | 是 | 是 | 是 | 女 | 118.00 | 72.00  | 128.00 | 84.00  |
| 72 | 否 | 否 | 是 | 女 | 130.00 | 80.00  | 138.00 | 87.00  |
| 69 | 否 | 否 | 是 | 女 | 136.00 | 90.00  | 140.00 | 90.00  |
| 70 | 是 | 否 | 是 | 女 | 157.00 | 83.00  | 160.00 | 86.00  |

|    |   |   |   |   |        |       |        |       |
|----|---|---|---|---|--------|-------|--------|-------|
| 80 | 否 | 否 | 是 | 女 | 144.00 | 90.00 | 146.00 | 84.00 |
| 71 | 是 | 是 | 是 | 女 | 139.00 | 68.00 | 140.00 | 70.00 |
| 78 | 是 | 是 | 是 | 女 | 110.00 | 60.00 | 112.00 | 62.00 |
| 75 | 是 | 是 | 是 | 女 | 115.00 | 60.00 | 120.00 | 63.00 |
| 78 | 是 | 否 | 是 | 女 | 140.00 | 80.00 | 152.00 | 90.00 |
| 81 | 否 | 否 | 是 | 女 | 146.00 | 83.00 | 136.00 | 70.00 |

| 身高 (cm) | 体重 (kg) | 腰围 (cm) | 体质指数  | 锻炼频率  | 每次锻炼  | 坚持锻炼  | 锻炼方式   | 吸烟状况 |
|---------|---------|---------|-------|-------|-------|-------|--------|------|
| 149.00  | 58.80   | 92.00   | 26.49 | 每天    | 60.00 | 1.00  | 散步     | 从不吸烟 |
| 149.00  | 54.80   | 90.00   | 24.68 | 不锻炼   |       |       |        | 从不吸烟 |
| 155.00  | 56.00   | 85.00   | 23.31 | 每天    | 20.00 | 1.00  | 散步     | 从不吸烟 |
| 144.00  | 51.00   | 75.00   | 24.59 | 不锻炼   |       |       |        | 从不吸烟 |
| 161.00  | 62.00   | 84.00   | 23.92 | 每周一次! | 30.00 | 4.00  | 散步     | 从不吸烟 |
| 150.00  | 55.50   | 76.00   | 24.67 | 每天    | 60.00 | 2.00  | 散步     | 从不吸烟 |
| 156.00  | 68.00   | 105.00  | 27.94 | 每天    | 30.00 | 2.00  | 散步     | 从不吸烟 |
| 146.00  | 54.00   | 96.80   | 25.33 | 不锻炼   |       |       |        | 从不吸烟 |
| 149.00  | 58.00   | 86.00   | 26.12 | 不锻炼   |       |       |        | 从不吸烟 |
| 149.00  | 60.00   | 91.00   | 27.03 | 每天    | 30.00 | 5.00  | 散步     | 从不吸烟 |
| 153.00  | 55.00   | 86.00   | 23.50 | 不锻炼   |       |       |        | 从不吸烟 |
| 151.00  | 57.00   | 93.00   | 25.00 | 每天    | 30.00 | 5.00  | 散步     | 从不吸烟 |
| 152.00  | 53.00   | 86.00   | 22.94 | 每天    | 30.00 | 7.00  | 散步     | 从不吸烟 |
| 141.00  | 56.00   | 87.00   | 28.17 | 每天    | 60.00 | 10.00 | 体操, 太极 | 从不吸烟 |
| 155.00  | 43.00   | 76.00   | 17.90 | 不锻炼   |       |       |        | 从不吸烟 |
| 148.00  | 56.00   | 90.00   | 25.57 | 不锻炼   |       |       |        | 从不吸烟 |
| 160.00  | 67.40   | 99.00   | 26.33 | 每周一次! | 30.00 | 10.00 | 散步     | 从不吸烟 |
| 146.00  | 55.00   | 85.00   | 25.80 | 不锻炼   |       |       |        | 从不吸烟 |
| 154.00  | 68.00   | 93.00   | 28.67 | 每天    | 60.00 | 12.00 | 散步     | 从不吸烟 |
| 154.00  | 47.00   | 72.00   | 19.82 | 不锻炼   |       |       |        | 从不吸烟 |
| 143.00  | 38.00   | 73.00   | 18.58 | 每天    | 30.00 | 4.00  | 散步     | 从不吸烟 |
| 155.50  | 70.30   | 98.00   | 29.07 | 每天    | 60.00 | 2.00  | 散步     | 从不吸烟 |
| 158.00  | 70.50   | 93.00   | 28.24 | 每天    | 30.00 | 3.00  | 散步     | 从不吸烟 |
| 158.00  | 61.50   | 86.00   | 24.64 | 每天    | 50.00 | 2.00  | 散步     | 从不吸烟 |
| 143.00  | 42.80   | 74.00   | 20.93 | 不锻炼   |       |       |        | 从不吸烟 |
| 166.00  | 68.00   | 100.00  | 24.68 | 不锻炼   |       |       |        | 从不吸烟 |
| 156.00  | 53.20   | 83.00   | 21.86 | 每天    | 60.00 | 8.00  | 散步     | 从不吸烟 |
| 145.50  | 72.00   | 103.00  | 34.01 | 每天    | 30.00 | 5.00  | 散步     | 从不吸烟 |
| 152.00  | 58.00   | 82.00   | 25.10 | 每天    | 60.00 | 3.00  | 散步     | 从不吸烟 |
| 156.00  | 62.20   | 91.00   | 25.56 | 每天    | 30.00 | 3.00  | 散步     | 从不吸烟 |
| 148.00  | 62.00   | 101.00  | 28.31 | 每天    | 20.00 | 2.00  | 散步     | 从不吸烟 |
| 144.00  | 51.10   | 90.00   | 24.64 | 每天    | 30.00 | 10.00 | 散步     | 从不吸烟 |
| 147.00  | 62.50   | 90.00   | 28.92 | 每天    | 30.00 | 3.00  | 散步     | 从不吸烟 |
| 150.00  | 75.00   | 98.00   | 33.33 | 每天    | 60.00 | 2.00  | 散步     | 从不吸烟 |
| 158.00  | 68.00   | 97.00   | 27.24 | 每天    | 60.00 | 8.00  | 跑步     | 从不吸烟 |
| 155.00  | 40.00   | 63.00   | 16.65 | 每周一次! | 30.00 | 6.00  | 散步     | 从不吸烟 |
| 152.00  | 73.00   | 104.00  | 31.60 | 不锻炼   |       |       |        | 从不吸烟 |
| 152.00  | 47.20   | 80.00   | 20.43 | 不锻炼   |       |       |        | 从不吸烟 |
| 145.00  | 49.50   | 83.00   | 23.54 | 每天    | 30.00 | 3.00  | 散步     | 从不吸烟 |
| 158.00  | 52.00   | 82.00   | 20.83 | 每天    | 60.00 | 5.00  | 散步     | 从不吸烟 |
| 140.00  | 45.00   | 82.00   | 22.96 | 每天    | 60.00 | 17.00 | 散步、太极  | 从不吸烟 |
| 155.00  | 59.00   | 90.00   | 24.56 | 每天    | 30.00 | 5.00  | 散步     | 从不吸烟 |
| 154.00  | 54.00   | 86.00   | 22.77 | 每周一次! | 30.00 | 2.00  | 散步     | 从不吸烟 |
| 153.00  | 55.00   | 78.00   | 23.50 | 每周一次! | 45.00 | 4.00  | 散步     | 从不吸烟 |
| 150.00  | 52.00   | 88.00   | 23.11 | 不锻炼   |       |       |        | 从不吸烟 |
| 155.00  | 49.00   | 72.00   | 20.40 | 每天    | 30.00 | 7.00  | 散步     | 从不吸烟 |
| 150.00  | 51.00   | 80.00   | 22.67 | 每天    | 60.00 | 10.00 | 跳舞     | 从不吸烟 |
| 147.00  | 59.00   | 87.00   | 27.30 | 每天    | 60.00 | 20.00 | 散步     | 从不吸烟 |
| 150.00  | 55.00   | 85.00   | 24.44 | 每天    | 30.00 | 4.00  | 散步     | 从不吸烟 |
| 150.00  | 51.00   | 72.00   | 22.67 | 每天    | 40.00 | 10.00 | 慢跑     | 从不吸烟 |

|        |       |        |       |       |       |       |        |      |
|--------|-------|--------|-------|-------|-------|-------|--------|------|
| 140.00 | 55.00 | 97.00  | 28.06 | 不锻炼   |       |       |        | 从不吸烟 |
| 147.50 | 53.80 | 87.00  | 24.73 | 不锻炼   |       |       |        | 从不吸烟 |
| 150.50 | 60.80 | 90.50  | 26.84 | 每天    | 60.00 | 6.00  | 散步     | 从不吸烟 |
| 156.00 | 56.50 | 81.00  | 23.22 | 不锻炼   |       |       |        | 从不吸烟 |
| 148.00 | 48.00 | 81.00  | 21.91 | 每天    | 30.00 | 6.00  | 散步     | 从不吸烟 |
| 153.00 | 63.50 | 94.00  | 27.13 | 每天    | 30.00 | 9.00  | 散步     | 从不吸烟 |
| 145.00 | 51.00 | 84.00  | 24.26 | 每天    | 30.00 |       | 散步     | 从不吸烟 |
| 150.00 | 65.70 | 92.00  | 29.20 | 每天    | 90.00 | 7.00  | 散步     | 从不吸烟 |
| 146.00 | 66.00 | 94.00  | 30.96 | 每天    | 30.00 | 7.00  | 散步     | 从不吸烟 |
| 142.00 | 46.00 | 75.00  | 22.81 | 每天    | 30.00 | 4.00  | 散步     | 从不吸烟 |
| 148.00 | 47.00 | 76.00  | 21.46 | 每天    | 60.00 | 4.00  | 散步     | 从不吸烟 |
| 151.00 | 61.50 | 84.00  | 26.97 | 每天    | 60.00 | 6.00  | 散步     | 从不吸烟 |
| 155.00 | 69.50 | 95.00  | 28.93 | 每天    | 30.00 | 1.00  | 散步     | 从不吸烟 |
| 156.00 | 62.50 | 84.00  | 25.68 | 不锻炼   |       |       |        | 从不吸烟 |
| 148.00 | 66.00 | 92.00  | 30.13 | 每天    | 30.00 | 1.00  | 散步     | 从不吸烟 |
| 162.00 | 54.50 | 81.00  | 20.77 | 每天    | 30.00 | 5.00  | 散步     | 从不吸烟 |
| 150.00 | 45.00 | 74.00  | 20.00 | 每天    | 60.00 | 2.00  | 散步     | 从不吸烟 |
| 153.00 | 62.00 | 94.00  | 26.49 | 每天    | 30.00 | 8.00  | 散步     | 从不吸烟 |
| 154.00 | 53.10 | 81.00  | 22.39 | 每天    | 30.00 | 6.00  | 散步     | 从不吸烟 |
| 153.00 | 62.00 | 94.00  | 26.49 | 不锻炼   |       |       |        | 从不吸烟 |
| 156.00 | 60.00 | 86.00  | 24.65 | 每天    | 60.00 | 4.00  | 散步     | 从不吸烟 |
| 150.00 | 69.80 | 96.00  | 31.02 | 不锻炼   |       |       |        | 从不吸烟 |
| 160.00 | 62.00 | 90.00  | 24.22 | 每天    | 30.00 | 2.00  | 散步     | 从不吸烟 |
| 151.00 | 54.00 | 91.00  | 23.68 | 每周一次! | 60.00 | 5.00  | 散步     | 从不吸烟 |
| 156.00 | 62.90 | 94.00  | 25.85 | 每天    | 30.00 | 10.00 | 散步     | 从不吸烟 |
| 155.00 | 63.00 | 93.00  | 26.22 | 每天    | 30.00 | 1.00  | 散步     | 从不吸烟 |
| 150.00 | 49.00 | 89.00  | 21.78 | 每天    | 20.00 | 5.00  | 散步, 做操 | 从不吸烟 |
| 147.00 | 50.00 | 79.00  | 23.14 | 不锻炼   |       |       |        | 从不吸烟 |
| 153.00 | 57.00 | 85.00  | 24.35 | 每天    | 30.00 | 1.00  | 散步     | 从不吸烟 |
| 152.00 | 67.00 | 100.00 | 29.00 | 每天    | 30.00 | 4.00  | 做操     | 从不吸烟 |
| 141.00 | 46.20 | 79.00  | 23.24 | 每天    | 60.00 | 2.00  | 散步     | 从不吸烟 |
| 151.50 | 64.40 | 94.00  | 28.06 | 每天    | 60.00 | 11.00 | 散步     | 从不吸烟 |
| 156.00 | 70.00 | 97.00  | 28.76 | 每天    | 30.00 | 3.00  | 散步     | 从不吸烟 |
| 142.00 | 45.00 | 88.00  | 22.32 | 不锻炼   |       |       |        | 从不吸烟 |
| 150.00 | 56.20 | 83.00  | 24.98 | 每天    | 30.00 | 6.00  | 散步     | 从不吸烟 |
| 149.00 | 42.00 | 70.00  | 18.92 | 不锻炼   |       |       |        | 从不吸烟 |
| 153.00 | 74.00 | 101.00 | 31.61 | 每天    | 60.00 | 8.00  | 散步     | 从不吸烟 |
| 150.00 | 45.00 | 69.00  | 20.00 | 每天    | 60.00 | 7.00  | 跳舞     | 从不吸烟 |
| 151.00 | 58.50 | 93.00  | 25.66 | 不锻炼   |       |       |        | 从不吸烟 |
| 158.00 | 60.50 | 83.00  | 24.23 | 每天    | 30.00 | 2.00  | 散步     | 从不吸烟 |
| 151.00 | 77.00 | 108.00 | 33.77 | 每周一次! | 30.00 | 2.00  | 散步     | 从不吸烟 |
| 148.00 | 65.00 | 105.00 | 29.67 | 每天    | 30.00 | 10.00 | 散步     | 从不吸烟 |
| 154.50 | 52.20 | 72.00  | 21.87 | 每天    | 30.00 | 4.00  | 散步     | 从不吸烟 |
| 156.50 | 54.60 | 88.00  | 22.29 | 每天    | 30.00 | 7.00  | 散步     | 从不吸烟 |
| 158.00 | 68.00 | 95.00  | 27.24 | 不锻炼   |       |       |        | 从不吸烟 |
| 149.00 | 50.00 | 78.00  | 22.52 | 每天    | 60.00 | 7.00  | 散步     | 从不吸烟 |
| 155.50 | 53.40 | 88.00  | 22.08 | 每周一次! | 60.00 | 3.00  | 散步     | 从不吸烟 |
| 152.50 | 47.90 | 86.00  | 20.60 | 每周一次! | 30.00 | 1.00  | 散步     | 从不吸烟 |
| 155.00 | 62.30 | 95.00  | 25.93 | 每天    | 35.00 | 2.00  | 散步     | 从不吸烟 |
| 150.00 | 52.30 | 95.00  | 23.24 | 每天    | 30.00 | 5.00  | 散步     | 从不吸烟 |
| 152.00 | 62.00 | 90.00  | 26.84 | 不锻炼   |       |       |        | 从不吸烟 |

|        |       |       |       |       |        |       |      |      |
|--------|-------|-------|-------|-------|--------|-------|------|------|
| 152.50 | 52.75 | 79.00 | 22.68 | 不锻炼   |        |       |      | 从不吸烟 |
| 146.00 | 41.00 | 74.00 | 19.23 | 每天    | 30.00  | 2.00  | 散步   | 从不吸烟 |
| 163.00 | 57.00 | 79.00 | 21.45 | 每周一次! | 60.00  | 10.00 | 散步   | 从不吸烟 |
| 149.00 | 61.00 | 88.00 | 27.48 | 每天    | 60.00  | 9.00  | 散步   | 从不吸烟 |
| 148.00 | 52.00 | 89.00 | 23.74 | 每天    | 30.00  | 3.00  | 散步   | 从不吸烟 |
| 147.00 | 55.00 | 89.00 | 25.45 | 不锻炼   |        |       |      | 从不吸烟 |
| 152.00 | 62.50 | 88.00 | 27.05 | 每天    | 60.00  | 11.00 | 散步   | 从不吸烟 |
| 154.00 | 63.50 | 90.00 | 26.78 | 每天    | 60.00  | 1.00  | 散步   | 从不吸烟 |
| 156.00 | 63.00 | 85.00 | 25.89 | 每天    | 30.00  | 5.00  | 散步   | 从不吸烟 |
| 150.00 | 42.00 | 70.00 | 18.67 | 每天    | 60.00  | 5.00  | 散步   | 从不吸烟 |
| 152.00 | 47.70 | 78.00 | 20.65 | 每天    | 30.00  | 1.00  | 散步   | 从不吸烟 |
| 148.00 | 39.00 | 66.00 | 17.80 | 不锻炼   |        |       |      | 从不吸烟 |
| 149.00 | 64.00 | 94.00 | 28.83 | 每天    | 30.00  | 3.00  | 散步   | 从不吸烟 |
| 140.00 | 54.30 | 93.00 | 27.70 | 每天    | 30.00  | 4.00  | 散步   | 从不吸烟 |
| 153.00 | 60.00 | 89.00 | 25.63 | 每天    | 30.00  | 10.00 | 散步   | 从不吸烟 |
| 157.00 | 60.20 | 92.00 | 24.42 | 每天    | 30.00  | 8.00  | 散步   | 从不吸烟 |
| 151.00 | 48.30 | 86.00 | 21.18 | 每天    | 30.00  | 1.00  | 散步   | 从不吸烟 |
| 152.00 | 52.00 | 84.00 | 22.51 | 每周一次! | 30.00  | 3.00  | 散步   | 从不吸烟 |
| 156.50 | 62.60 | 97.00 | 25.56 | 每天    | 60.00  | 10.00 | 散步   | 从不吸烟 |
| 161.00 | 60.00 | 80.00 | 23.15 | 每天    | 60.00  | 15.00 | 散步   | 从不吸烟 |
| 142.00 | 44.00 | 78.00 | 21.82 | 每天    | 30.00  | 1.00  | 散步   | 从不吸烟 |
| 146.00 | 49.00 | 77.00 | 22.99 | 不锻炼   |        |       |      | 从不吸烟 |
| 153.00 | 60.00 | 87.00 | 25.63 | 不锻炼   |        |       |      | 从不吸烟 |
| 144.00 | 58.30 | 91.00 | 28.12 | 每天    | 30.00  | 4.00  | 散步   | 从不吸烟 |
| 148.00 | 58.00 | 91.00 | 26.48 | 不锻炼   |        |       |      | 从不吸烟 |
| 157.00 | 59.00 | 83.00 | 23.94 | 不锻炼   |        |       |      | 从不吸烟 |
| 148.50 | 45.70 | 84.00 | 20.72 | 每天    | 30.00  | 6.00  | 散步   | 从不吸烟 |
| 143.50 | 47.10 | 82.00 | 22.87 | 每天    | 30.00  | 2.00  | 散步   | 从不吸烟 |
| 154.00 | 60.00 | 88.00 | 25.30 | 每天    | 30.00  | 4.00  | 散步   | 从不吸烟 |
| 150.00 | 58.00 | 93.00 | 25.78 | 每天    | 60.00  | 8.00  | 散步   | 从不吸烟 |
| 141.50 | 51.55 | 85.00 | 25.75 | 每天    | 30.00  | 11.00 | 散步   | 从不吸烟 |
| 155.00 | 60.60 | 95.00 | 25.22 | 不锻炼   |        |       |      | 从不吸烟 |
| 152.00 | 55.00 | 86.00 | 23.81 | 不锻炼   |        |       |      | 从不吸烟 |
| 148.00 | 65.00 | 99.00 | 29.67 | 每周一次! | 20.00  | 1.00  | 散步   | 从不吸烟 |
| 155.00 | 67.30 | 90.00 | 28.01 | 每天    | 60.00  | 8.00  | 散步   | 从不吸烟 |
| 145.00 | 55.00 | 91.00 | 26.16 | 每天    | 45.00  | 10.00 | 散步   | 从不吸烟 |
| 154.00 | 69.00 | 98.00 | 29.09 | 每周一次! | 30.00  | 5.00  | 散步   | 从不吸烟 |
| 152.00 | 42.00 | 60.00 | 18.18 | 不锻炼   |        |       |      | 从不吸烟 |
| 158.00 | 62.00 | 92.00 | 24.84 | 每天    | 30.00  | 10.00 | 散步   | 从不吸烟 |
| 153.00 | 63.00 | 91.00 | 26.91 | 不锻炼   |        |       |      | 从不吸烟 |
| 152.00 | 41.00 | 65.00 | 17.75 | 每天    | 30.00  | 7.00  | 散步   | 从不吸烟 |
| 154.00 | 57.00 | 87.00 | 24.03 | 每天    | 40.00  | 2.00  | 散步   | 从不吸烟 |
| 148.00 | 56.70 | 88.00 | 25.89 | 每天    | 30.00  | 1.00  | 散步   | 从不吸烟 |
| 157.00 | 52.00 | 89.00 | 21.10 | 每天    | 60.00  | 5.00  | 散步   | 从不吸烟 |
| 149.00 | 50.50 | 87.00 | 22.75 | 每天    | 30.00  | 7.00  | 散步、跑 | 从不吸烟 |
| 144.50 | 57.90 | 82.00 | 27.73 | 每天    | 40.00  | 16.00 | 散步   | 从不吸烟 |
| 148.00 | 52.50 | 84.00 | 23.97 | 每天    | 30.00  | 2.00  | 散步   | 从不吸烟 |
| 150.50 | 52.50 | 92.00 | 23.18 | 每天    | 30.00  | 1.00  | 散步   | 从不吸烟 |
| 160.00 | 53.00 | 77.00 | 20.70 | 每天    | 120.00 | 13.00 | 散步   | 从不吸烟 |
| 153.00 | 55.00 | 89.00 | 23.50 | 每天    | 60.00  | 60.00 | 跳舞   | 从不吸烟 |
| 154.00 | 58.00 | 89.00 | 24.46 | 不锻炼   |        |       |      | 从不吸烟 |

|        |       |        |       |       |       |       |      |      |
|--------|-------|--------|-------|-------|-------|-------|------|------|
| 145.00 | 43.00 | 80.00  | 20.45 | 每天    | 60.00 | 6.00  | 做操   | 从不吸烟 |
| 149.00 | 58.80 | 89.00  | 26.49 | 每天    | 30.00 | 8.00  | 散步   | 从不吸烟 |
| 151.00 | 53.00 | 82.00  | 23.24 | 每天    | 30.00 | 6.00  | 散步   | 从不吸烟 |
| 150.00 | 47.00 | 81.00  | 20.89 | 每天    | 60.00 | 4.00  | 散步   | 从不吸烟 |
| 151.50 | 50.00 | 84.00  | 21.78 | 每天    | 30.00 | 6.00  | 散步   | 从不吸烟 |
| 155.00 | 67.00 | 91.00  | 27.89 | 每天    | 30.00 | 4.00  | 散步   | 从不吸烟 |
| 164.00 | 73.00 | 88.00  | 27.14 | 不锻炼   |       |       |      | 从不吸烟 |
| 142.00 | 48.00 | 86.00  | 23.80 | 每天    | 75.00 | 1.00  | 散步   | 从不吸烟 |
| 151.00 | 58.00 | 94.00  | 25.44 | 不锻炼   |       |       |      | 从不吸烟 |
| 140.00 | 52.00 | 88.00  | 26.53 | 每天    | 30.00 | 6.00  | 散步   | 从不吸烟 |
| 141.50 | 47.75 | 83.00  | 23.85 | 每天    | 60.00 | 5.00  | 太极、跳 | 从不吸烟 |
| 166.00 | 71.00 | 94.00  | 25.77 | 每天    | 60.00 | 5.00  | 散步   | 从不吸烟 |
| 150.00 | 51.00 | 78.00  | 22.67 | 不锻炼   |       |       |      | 从不吸烟 |
| 157.00 | 56.00 | 88.00  | 22.72 | 每天    | 30.00 | 3.00  | 散步   | 从不吸烟 |
| 158.00 | 45.50 | 66.00  | 18.23 | 每天    | 30.00 | 1.00  | 散步   | 从不吸烟 |
| 154.00 | 53.10 | 81.00  | 22.39 | 每天    | 60.00 | 8.00  | 散步   | 从不吸烟 |
| 144.50 | 48.90 | 83.00  | 23.42 | 每周一次↓ | 30.00 | 3.00  | 散步   | 从不吸烟 |
| 147.00 | 50.25 | 80.00  | 23.25 | 每天    | 30.00 | 7.00  | 散步   | 从不吸烟 |
| 137.00 | 42.50 | 81.00  | 22.64 | 每天    | 30.00 | 4.00  | 散步   | 从不吸烟 |
| 157.50 | 61.75 | 87.00  | 24.89 | 不锻炼   |       |       |      | 从不吸烟 |
| 153.50 | 61.20 | 96.00  | 25.97 | 每天    | 30.00 | 1.00  | 散步   | 从不吸烟 |
| 152.00 | 63.70 | 89.00  | 27.57 | 每天    | 60.00 | 3.00  | 散步   | 从不吸烟 |
| 154.00 | 51.20 | 80.00  | 21.59 | 不锻炼   |       |       |      | 从不吸烟 |
| 147.00 | 68.00 | 94.00  | 31.47 | 每天    | 60.00 | 2.00  | 散步   | 从不吸烟 |
| 146.00 | 62.00 | 92.00  | 29.09 | 不锻炼   |       |       |      | 从不吸烟 |
| 147.00 | 53.45 | 80.00  | 24.74 | 不锻炼   |       |       |      | 从不吸烟 |
| 143.00 | 55.00 | 92.00  | 26.90 | 每天    | 30.00 | 1.00  | 散步   | 从不吸烟 |
| 153.00 | 58.00 | 95.00  | 24.78 | 不锻炼   |       |       |      | 从不吸烟 |
| 147.50 | 60.25 | 94.00  | 27.69 | 不锻炼   |       |       |      | 从不吸烟 |
| 154.00 | 52.40 | 81.00  | 22.09 | 不锻炼   |       |       |      | 从不吸烟 |
| 152.00 | 54.70 | 83.00  | 23.68 | 每天    | 60.00 | 6.00  | 散步   | 从不吸烟 |
| 150.00 | 60.00 | 91.00  | 26.67 | 每天    | 30.00 | 2.00  | 散步   | 从不吸烟 |
| 155.00 | 54.00 | 83.00  | 22.48 | 每周一次↓ | 30.00 | 5.00  | 散步   | 从不吸烟 |
| 152.00 | 56.00 | 84.00  | 24.24 | 每天    | 60.00 | 5.00  | 散步   | 从不吸烟 |
| 146.00 | 55.00 | 86.00  | 25.80 | 每天    | 30.00 | 10.00 | 散步   | 从不吸烟 |
| 148.00 | 45.50 | 76.00  | 20.77 | 每天    | 60.00 | 9.00  | 散步   | 从不吸烟 |
| 147.50 | 44.00 | 75.00  | 20.22 | 不锻炼   |       |       |      | 从不吸烟 |
| 147.00 | 57.00 | 78.00  | 26.38 | 每天    | 30.00 | 5.00  | 散步   | 从不吸烟 |
| 155.00 | 56.20 | 91.00  | 23.39 | 每天    | 30.00 | 1.00  | 散步   | 从不吸烟 |
| 151.00 | 58.90 | 89.00  | 25.83 | 每天    | 60.00 | 12.00 | 散步   | 从不吸烟 |
| 149.00 | 56.00 | 91.00  | 25.22 | 每天    | 60.00 | 20.00 | 散步   | 从不吸烟 |
| 154.00 | 82.00 | 114.00 | 34.58 | 每天    | 60.00 | 11.00 | 散步   | 从不吸烟 |
| 155.00 | 54.00 | 87.00  | 22.48 | 每天    | 30.00 | 4.00  | 散步   | 从不吸烟 |
| 148.00 | 42.00 | 79.00  | 19.17 | 不锻炼   |       |       |      | 从不吸烟 |
| 140.00 | 63.00 | 104.00 | 32.14 | 每天    | 30.00 | 4.00  | 散步   | 从不吸烟 |
| 148.00 | 38.00 | 66.00  | 17.35 | 不锻炼   |       |       |      | 从不吸烟 |
| 145.00 | 44.00 | 77.00  | 20.93 | 不锻炼   |       |       |      | 吸烟   |
| 149.00 | 55.00 | 81.00  | 24.77 | 每周一次↓ | 30.00 | 5.00  | 散步   | 从不吸烟 |
| 150.00 | 55.00 | 87.00  | 24.44 | 每天    | 30.00 | 3.00  | 散步   | 从不吸烟 |
| 141.00 | 50.00 | 79.00  | 25.15 | 每天    | 30.00 | 12.00 | 散步   | 从不吸烟 |
| 159.00 | 71.00 | 90.00  | 28.08 | 每天    | 30.00 | 7.00  | 散步   | 从不吸烟 |

|        |       |        |       |       |        |       |    |      |
|--------|-------|--------|-------|-------|--------|-------|----|------|
| 161.00 | 65.00 | 95.00  | 25.08 | 每天    | 30.00  | 6.00  | 散步 | 从不吸烟 |
| 156.00 | 66.00 | 96.00  | 27.12 | 不锻炼   |        |       |    | 从不吸烟 |
| 148.50 | 65.60 | 94.00  | 29.75 | 每天    | 30.00  | 2.00  | 散步 | 从不吸烟 |
| 143.00 | 48.00 | 86.00  | 23.47 | 每天    | 30.00  | 14.00 | 散步 | 从不吸烟 |
| 158.00 | 56.00 | 86.00  | 22.43 | 每周一次! | 40.00  | 5.00  | 散步 | 从不吸烟 |
| 153.00 | 61.00 | 89.00  | 26.06 | 不锻炼   |        |       |    | 从不吸烟 |
| 149.00 | 48.40 | 80.00  | 21.80 | 每天    | 30.00  | 11.00 | 散步 | 从不吸烟 |
| 152.00 | 63.00 | 95.00  | 27.27 | 不锻炼   |        |       |    | 从不吸烟 |
| 152.00 | 51.00 | 78.00  | 22.07 | 每天    | 30.00  | 4.00  | 散步 | 从不吸烟 |
| 145.00 | 50.00 | 86.00  | 23.78 | 每天    | 60.00  | 5.00  | 散步 | 从不吸烟 |
| 141.00 | 46.00 | 81.00  | 23.14 | 每天    | 30.00  | 4.00  | 散步 | 从不吸烟 |
| 149.00 | 46.00 | 77.00  | 20.72 | 每天    | 30.00  | 4.00  | 散步 | 从不吸烟 |
| 152.00 | 58.50 | 88.00  | 25.32 | 每天    | 20.00  | 7.00  | 散步 | 从不吸烟 |
| 154.00 | 46.00 | 75.00  | 19.40 | 每天    | 60.00  | 20.00 | 散步 | 从不吸烟 |
| 152.00 | 72.00 | 104.00 | 31.16 | 每天    | 60.00  | 1.00  | 散步 | 从不吸烟 |
| 160.00 | 48.30 | 76.00  | 18.87 | 每天    | 30.00  | 2.00  | 散步 | 从不吸烟 |
| 148.00 | 59.00 | 91.00  | 26.94 | 每天    | 30.00  | 1.00  | 散步 | 从不吸烟 |
| 144.00 | 43.00 | 78.00  | 20.74 | 每天    | 20.00  | 3.00  | 散步 | 从不吸烟 |
| 153.50 | 69.80 | 92.00  | 29.62 | 每天    | 30.00  | 5.00  | 散步 | 从不吸烟 |
| 150.00 | 51.00 | 84.00  | 22.67 | 不锻炼   |        |       |    | 从不吸烟 |
| 148.00 | 64.00 | 100.00 | 29.22 | 每周一次! | 60.00  | 6.00  | 散步 | 从不吸烟 |
| 145.00 | 52.00 | 92.00  | 24.73 | 不锻炼   |        |       |    | 吸烟   |
| 151.00 | 45.00 | 71.00  | 19.74 | 每天    | 30.00  | 2.00  | 散步 | 从不吸烟 |
| 150.00 | 58.00 | 93.00  | 25.78 | 每天    | 30.00  | 2.00  | 散步 | 从不吸烟 |
| 145.50 | 47.80 | 91.00  | 22.58 | 每周一次! | 30.00  | 2.00  | 散步 | 从不吸烟 |
| 156.50 | 43.50 | 68.00  | 17.76 | 每天    | 30.00  | 2.00  | 散步 | 从不吸烟 |
| 155.00 | 63.00 | 90.00  | 26.22 | 每天    | 60.00  | 6.00  | 散步 | 从不吸烟 |
| 153.50 | 49.20 | 77.00  | 20.88 | 不锻炼   |        |       |    | 从不吸烟 |
| 153.00 | 62.00 | 90.00  | 26.49 | 不锻炼   |        |       |    | 从不吸烟 |
| 142.00 | 46.00 | 75.00  | 22.81 | 每天    | 30.00  | 10.00 | 散步 | 从不吸烟 |
| 159.50 | 59.60 | 88.00  | 23.43 | 每天    | 60.00  | 10.00 | 散步 | 从不吸烟 |
| 158.00 | 69.00 | 89.00  | 27.64 | 不锻炼   |        |       |    | 从不吸烟 |
| 151.00 | 44.70 | 62.00  | 19.60 | 每天    | 30.00  | 3.00  | 散步 | 从不吸烟 |
| 156.50 | 53.60 | 73.00  | 21.88 | 每天    | 30.00  | 5.00  | 散步 | 从不吸烟 |
| 156.00 | 61.90 | 86.00  | 25.44 | 每天    | 60.00  | 6.00  | 散步 | 从不吸烟 |
| 147.00 | 58.00 | 94.00  | 26.84 | 不锻炼   |        |       |    | 从不吸烟 |
| 155.00 | 51.00 | 83.00  | 21.23 | 每天    | 30.00  | 3.00  | 散步 | 从不吸烟 |
| 156.00 | 56.50 | 93.80  | 23.22 | 每天    | 30.00  | 2.00  | 散步 | 从不吸烟 |
| 140.00 | 51.00 | 90.00  | 26.02 | 不锻炼   |        |       |    | 从不吸烟 |
| 139.00 | 42.80 | 93.00  | 22.15 | 每天    | 20.00  | 1.00  | 散步 | 从不吸烟 |
| 145.00 | 38.10 | 72.00  | 18.12 | 每天    | 120.00 | 2.00  | 散步 | 从不吸烟 |
| 150.50 | 54.80 | 87.00  | 24.19 | 每天    | 30.00  | 2.00  | 散步 | 从不吸烟 |
| 150.00 | 52.50 | 84.00  | 23.33 | 不锻炼   |        |       |    | 从不吸烟 |
| 154.00 | 57.00 | 92.00  | 24.03 | 不锻炼   |        |       |    | 从不吸烟 |
| 148.00 | 45.00 | 67.00  | 20.54 | 每周一次! | 30.00  | 1.00  | 散步 | 从不吸烟 |
| 143.00 | 42.00 | 73.00  | 20.54 | 不锻炼   |        |       |    | 从不吸烟 |
| 149.00 | 56.50 | 93.00  | 25.45 | 每周一次! | 30.00  | 10.00 | 散步 | 从不吸烟 |
| 152.00 | 66.00 | 96.00  | 28.57 | 每周一次! | 30.00  | 6.00  | 散步 | 从不吸烟 |
| 158.00 | 62.00 | 82.00  | 24.84 | 每天    | 180.00 | 15.00 | 散步 | 从不吸烟 |
| 153.50 | 67.50 | 91.00  | 28.65 | 每天    | 60.00  | 5.00  | 做操 | 从不吸烟 |
| 158.00 | 50.00 | 81.00  | 20.03 | 不锻炼   |        |       |    | 从不吸烟 |

|        |       |        |       |       |       |       |       |      |
|--------|-------|--------|-------|-------|-------|-------|-------|------|
| 146.00 | 48.60 | 79.00  | 22.80 | 每周一次↓ | 15.00 | 1.00  | 散步    | 从不吸烟 |
| 150.00 | 53.15 | 86.00  | 23.62 | 不锻炼   |       |       |       | 从不吸烟 |
| 146.00 | 57.00 | 90.00  | 26.74 | 每天    | 30.00 | 8.00  | 散步    | 从不吸烟 |
| 156.00 | 51.00 | 80.00  | 20.96 | 每天    | 60.00 | 3.00  | 散步    | 从不吸烟 |
| 144.00 | 61.00 | 97.00  | 29.42 | 不锻炼   |       |       |       | 从不吸烟 |
| 151.00 | 46.20 | 80.00  | 20.26 | 每天    | 60.00 | 6.00  | 散步    | 从不吸烟 |
| 159.00 | 58.00 | 85.00  | 22.94 | 每天    | 30.00 | 10.00 | 散步    | 从不吸烟 |
| 153.00 | 57.70 | 87.00  | 24.65 | 每天    | 60.00 | 10.00 | 太极    | 从不吸烟 |
| 167.00 | 47.00 | 67.00  | 16.85 | 每天    | 30.00 | 10.00 | 散步    | 从不吸烟 |
| 153.00 | 64.00 | 93.00  | 27.34 | 每天    | 60.00 | 8.00  | 散步、打  | 从不吸烟 |
| 151.00 | 58.00 | 90.00  | 25.44 | 每天    | 30.00 | 2.00  | 散步    | 从不吸烟 |
| 154.00 | 50.00 | 76.00  | 21.08 | 每天    | 30.00 | 2.00  | 散步    | 从不吸烟 |
| 152.00 | 51.00 | 88.00  | 22.07 | 不锻炼   |       |       |       | 从不吸烟 |
| 138.00 | 53.00 | 89.00  | 27.83 | 不锻炼   |       |       |       | 从不吸烟 |
| 148.00 | 87.00 | 117.00 | 39.72 | 每天    | 30.00 | 2.00  | 散步(使) | 从不吸烟 |
| 150.00 | 52.00 | 80.00  | 23.11 | 每天    | 30.00 | 11.00 | 散步    | 从不吸烟 |
| 154.50 | 57.55 | 82.00  | 24.11 | 每天    | 30.00 | 5.00  | 散步    | 从不吸烟 |
| 143.00 | 54.65 | 81.00  | 26.73 | 每天    | 40.00 | 7.00  | 散步    | 从不吸烟 |
| 156.00 | 75.00 | 108.00 | 30.82 | 不锻炼   |       |       |       | 从不吸烟 |
| 141.50 | 38.70 | 62.00  | 19.33 | 每天    | 60.00 | 6.00  | 散步    | 从不吸烟 |
| 153.00 | 60.00 | 81.00  | 25.63 | 每天    | 60.00 | 3.00  | 散步    | 从不吸烟 |
| 150.00 | 54.00 | 88.00  | 24.00 | 每天    | 60.00 | 3.00  | 散步    | 从不吸烟 |
| 158.00 | 63.00 | 97.00  | 25.24 | 不锻炼   |       |       |       | 从不吸烟 |
| 160.00 | 63.00 | 89.00  | 24.61 | 每天    | 60.00 | 20.00 | 散步    | 从不吸烟 |
| 146.00 | 37.00 | 67.00  | 17.36 | 每天    | 30.00 | 5.00  | 散步    | 从不吸烟 |
| 152.00 | 53.00 | 82.00  | 22.94 | 不锻炼   |       |       |       | 从不吸烟 |
| 150.00 | 49.00 | 78.00  | 21.78 | 每天    | 30.00 | 22.00 | 散步    | 从不吸烟 |
| 148.00 | 54.00 | 87.00  | 24.65 | 每天    | 30.00 | 2.00  | 散步    | 从不吸烟 |
| 147.00 | 73.00 | 104.00 | 33.78 | 不锻炼   |       |       |       | 从不吸烟 |
| 153.00 | 52.00 | 74.00  | 22.21 | 每天    | 30.00 | 3.00  | 散步    | 从不吸烟 |
| 166.00 | 78.00 | 102.00 | 28.31 | 不锻炼   |       |       |       | 从不吸烟 |
| 154.00 | 49.00 | 82.00  | 20.66 | 不锻炼   |       |       |       | 从不吸烟 |
| 151.00 | 52.00 | 78.00  | 22.81 | 每天    | 60.00 | 1.00  | 跳舞    | 从不吸烟 |
| 146.00 | 46.00 | 87.00  | 21.58 | 每天    | 20.00 | 5.00  | 散步    | 吸烟   |
| 151.00 | 47.00 | 82.00  | 20.61 | 每天    | 60.00 | 4.00  | 散步    | 从不吸烟 |
| 156.00 | 60.00 | 85.00  | 24.65 | 每天    | 30.00 | 1.00  | 散步    | 从不吸烟 |
| 154.00 | 55.00 | 79.00  | 23.19 | 每天    | 30.00 | 7.00  | 散步    | 从不吸烟 |
| 151.00 | 56.00 | 88.00  | 24.56 | 每天    | 60.00 | 20.00 | 散步    | 从不吸烟 |
| 148.00 | 65.80 | 90.00  | 30.04 | 每天    | 30.00 | 3.00  | 散步    | 从不吸烟 |
| 152.00 | 59.00 | 84.00  | 25.54 | 每天    | 30.00 | 21.00 | 散步    | 从不吸烟 |
| 151.00 | 71.00 | 102.00 | 31.14 | 每天    | 60.00 | 12.00 | 打太极   | 从不吸烟 |
| 149.00 | 64.00 | 92.00  | 28.83 | 每周一次↓ | 30.00 | 12.00 | 散步    | 从不吸烟 |
| 156.00 | 47.00 | 72.00  | 19.31 | 每天    | 60.00 | 11.00 | 散步    | 从不吸烟 |
| 148.00 | 50.00 | 88.00  | 22.83 | 不锻炼   |       |       |       | 从不吸烟 |
| 158.00 | 60.00 | 86.00  | 24.03 | 每天    | 30.00 | 7.00  | 广场舞   | 从不吸烟 |
| 125.00 | 39.00 | 78.50  | 24.96 | 每天    | 30.00 | 1.00  | 散步    | 从不吸烟 |
| 150.00 | 48.00 | 83.00  | 21.33 | 不锻炼   |       |       |       | 从不吸烟 |
| 156.00 | 47.00 | 70.00  | 19.31 | 每天    | 30.00 | 5.00  | 散步    | 从不吸烟 |
| 145.00 | 51.00 | 98.00  | 24.26 | 每天    | 30.00 | 12.00 | 散步    | 从不吸烟 |
| 154.00 | 52.00 | 74.00  | 21.93 | 每天    | 60.00 | 17.00 | 跳舞    | 从不吸烟 |
| 153.00 | 55.50 | 83.00  | 23.71 | 每天    | 30.00 | 1.00  | 散步    | 从不吸烟 |

|        |       |        |       |       |       |       |       |      |
|--------|-------|--------|-------|-------|-------|-------|-------|------|
| 138.00 | 50.50 | 96.00  | 26.52 | 每天    | 30.00 | 7.00  | 散步    | 从不吸烟 |
| 148.00 | 51.00 | 89.00  | 23.28 | 每天    | 60.00 | 3.00  | 散步    | 从不吸烟 |
| 151.00 | 58.00 | 90.00  | 25.44 | 每天    | 30.00 | 6.00  | 散步    | 从不吸烟 |
| 148.00 | 54.00 | 88.00  | 24.65 | 每天    | 30.00 | 2.00  | 散步    | 从不吸烟 |
| 145.00 | 46.50 | 78.00  | 22.12 | 每天    | 60.00 | 14.00 | 散步    | 从不吸烟 |
| 150.00 | 49.00 | 87.00  | 21.78 | 不锻炼   |       |       |       | 从不吸烟 |
| 153.00 | 46.00 | 76.00  | 19.65 | 不锻炼   |       |       |       | 从不吸烟 |
| 142.50 | 54.80 | 88.00  | 26.99 | 不锻炼   |       |       |       | 从不吸烟 |
| 158.00 | 50.00 | 73.50  | 20.03 | 不锻炼   |       |       |       | 从不吸烟 |
| 159.00 | 78.00 | 107.00 | 30.85 | 不锻炼   |       |       |       | 从不吸烟 |
| 160.50 | 46.30 | 68.00  | 17.97 | 不锻炼   |       |       |       | 从不吸烟 |
| 145.00 | 61.00 | 101.00 | 29.01 | 每天    | 60.00 | 1.00  | 散步    | 从不吸烟 |
| 150.00 | 46.00 | 72.00  | 20.44 | 每天    | 60.00 | 22.00 | 散步    | 从不吸烟 |
| 151.00 | 55.00 | 84.00  | 24.12 | 每天    | 30.00 | 1.00  | 散步    | 从不吸烟 |
| 148.00 | 70.00 | 100.00 | 31.96 | 每天    | 30.00 | 23.00 | 散步    | 从不吸烟 |
| 155.00 | 54.50 | 78.00  | 22.68 | 每天    | 60.00 | 11.00 | 散步    | 从不吸烟 |
| 147.00 | 58.00 | 100.00 | 26.84 | 每天    | 60.00 | 6.00  | 散步    | 从不吸烟 |
| 154.00 | 57.00 | 87.00  | 24.03 | 每周一次↓ | 20.00 | 4.00  | 慢走    | 从不吸烟 |
| 157.00 | 51.00 | 90.00  | 20.69 | 每天    | 30.00 | 20.00 | 散步    | 从不吸烟 |
| 150.00 | 41.00 | 70.00  | 18.22 | 不锻炼   |       |       |       | 从不吸烟 |
| 151.00 | 50.00 | 78.00  | 21.93 | 每天    | 60.00 | 6.00  | 散步    | 从不吸烟 |
| 140.00 | 50.00 | 88.00  | 25.51 | 每天    | 30.00 | 6.00  | 散步    | 从不吸烟 |
| 138.00 | 38.00 | 70.00  | 19.95 | 不锻炼   |       |       |       | 从不吸烟 |
| 155.00 | 65.00 | 94.00  | 27.06 | 每天    | 60.00 | 6.00  | 散步    | 从不吸烟 |
| 145.00 | 44.00 | 82.00  | 20.93 | 不锻炼   |       |       |       | 从不吸烟 |
| 145.00 | 53.00 | 85.00  | 25.21 | 每天    | 30.00 | 7.00  | 散步    | 从不吸烟 |
| 159.00 | 59.00 | 88.00  | 23.34 | 每天    | 30.00 | 2.00  | 散步    | 从不吸烟 |
| 160.00 | 52.00 | 80.00  | 20.31 | 不锻炼   |       |       |       | 从不吸烟 |
| 155.00 | 47.50 | 76.00  | 19.77 | 每天    | 60.00 | 2.00  | 散步    | 从不吸烟 |
| 148.00 | 60.00 | 92.00  | 27.39 | 每天    | 60.00 | 2.00  | 散步    | 从不吸烟 |
| 149.50 | 54.90 | 83.00  | 24.56 | 每天    | 30.00 | 4.00  | 散步    | 从不吸烟 |
| 150.00 | 35.00 | 78.00  | 15.56 | 不锻炼   |       |       |       | 从不吸烟 |
| 153.00 | 49.50 | 58.00  | 21.15 | 每天    | 40.00 | 2.00  | 散步    | 从不吸烟 |
| 149.00 | 64.00 | 91.00  | 28.83 | 每天    | 60.00 | 17.00 | 散步    | 从不吸烟 |
| 154.00 | 60.00 | 80.00  | 25.30 | 每天    | 60.00 | 22.00 | 散步    | 从不吸烟 |
| 152.00 | 57.00 | 85.00  | 24.67 | 每天    | 60.00 | 3.00  | 散步    | 从不吸烟 |
| 155.00 | 57.00 | 81.00  | 23.73 | 每天    | 60.00 | 5.00  | 散步    | 从不吸烟 |
| 145.00 | 49.80 | 84.00  | 23.69 | 每天    | 30.00 | 4.00  | 散步    | 从不吸烟 |
| 148.00 | 60.10 | 89.00  | 27.44 | 每周一次↓ | 30.00 | 2.00  | 散步    | 从不吸烟 |
| 145.00 | 60.00 | 103.00 | 28.54 | 每天    | 60.00 | 2.00  | 散步    | 从不吸烟 |
| 152.00 | 44.00 | 70.00  | 19.04 | 每天    | 60.00 | 6.00  | 散步    | 从不吸烟 |
| 144.00 | 34.00 | 60.00  | 16.40 | 不锻炼   |       |       |       | 从不吸烟 |
| 152.00 | 76.70 | 99.00  | 33.20 | 每天    | 30.00 | 3.00  | 散步    | 从不吸烟 |
| 138.00 | 40.00 | 73.00  | 21.00 | 每天    | 30.00 | 20.00 | 散步    | 吸烟   |
| 152.00 | 64.00 | 97.00  | 27.70 | 不锻炼   |       |       |       | 从不吸烟 |
| 143.00 | 61.00 | 93.00  | 29.83 | 每天    | 30.00 | 2.00  | 助行器辅助 | 从不吸烟 |
| 146.00 | 54.00 | 84.00  | 25.33 | 每天    | 60.00 | 10.00 | 散步    | 从不吸烟 |
| 142.00 | 52.00 | 89.00  | 25.79 | 每天    | 60.00 | 1.00  | 散步    | 从不吸烟 |
| 148.00 | 55.00 | 90.00  | 25.11 | 每天    | 30.00 | 6.00  | 散步    | 从不吸烟 |
| 155.00 | 56.00 | 85.00  | 23.31 | 不锻炼   |       |       |       | 从不吸烟 |
| 156.00 | 54.00 | 84.00  | 22.19 | 每周一次↓ | 60.00 | 16.00 | 跑步、散步 | 从不吸烟 |

|        |       |        |       |       |       |       |      |      |
|--------|-------|--------|-------|-------|-------|-------|------|------|
| 146.00 | 54.00 | 86.00  | 25.33 | 每天    | 60.00 | 11.00 | 散步   | 从不吸烟 |
| 147.00 | 63.00 | 97.00  | 29.15 | 每周一次↓ | 30.00 | 5.00  | 散步   | 从不吸烟 |
| 137.00 | 60.00 | 90.00  | 31.97 | 每天    | 30.00 | 6.00  | 散步   | 从不吸烟 |
| 152.00 | 61.20 | 95.00  | 26.49 | 每天    | 60.00 | 1.00  | 散步   | 从不吸烟 |
| 148.00 | 58.00 | 91.00  | 26.48 | 每天    | 60.00 | 2.00  | 散步   | 从不吸烟 |
| 160.00 | 83.00 | 94.00  | 32.42 | 每周一次↓ | 60.00 | 1.00  | 散步   | 从不吸烟 |
| 145.00 | 55.00 | 94.00  | 26.16 | 不锻炼   |       |       |      | 从不吸烟 |
| 156.00 | 65.00 | 86.00  | 26.71 | 每天    | 30.00 | 12.00 | 散步   | 从不吸烟 |
| 158.00 | 65.00 | 95.00  | 26.04 | 不锻炼   |       |       |      | 从不吸烟 |
| 150.50 | 45.70 | 89.50  | 20.18 | 每天    | 60.00 | 10.00 | 散步   | 从不吸烟 |
| 156.00 | 56.00 | 89.00  | 23.01 | 每天    | 30.00 | 1.00  | 散步   | 从不吸烟 |
| 154.00 | 62.00 | 94.00  | 26.14 | 每天    | 30.00 | 6.00  | 散步   | 从不吸烟 |
| 152.00 | 65.50 | 112.00 | 28.35 | 不锻炼   |       |       |      | 从不吸烟 |
| 157.00 | 69.00 | 94.00  | 27.99 | 每天    | 30.00 | 1.00  | 散步   | 从不吸烟 |
| 136.50 | 47.90 | 89.00  | 25.71 | 每天    | 30.00 | 7.00  | 散步   | 吸烟   |
| 154.00 | 40.00 | 63.00  | 16.87 | 每天    | 30.00 | 3.00  | 散步   | 从不吸烟 |
| 152.00 | 52.00 | 85.00  | 22.51 | 每天    | 60.00 | 10.00 | 打球   | 从不吸烟 |
| 155.00 | 54.00 | 76.00  | 22.48 | 每周一次↓ | 60.00 | 12.00 | 跳舞   | 从不吸烟 |
| 156.00 | 49.00 | 75.00  | 20.13 | 每天    | 30.00 | 1.00  | 散步   | 从不吸烟 |
| 154.00 | 64.00 | 95.00  | 26.99 | 每天    | 60.00 | 1.00  | 散步   | 从不吸烟 |
| 160.00 | 59.00 | 94.00  | 23.05 | 每天    | 60.00 | 6.00  | 散步   | 从不吸烟 |
| 152.00 | 56.50 | 88.00  | 24.45 | 每天    | 60.00 | 10.00 | 散步   | 从不吸烟 |
| 165.50 | 71.00 | 95.00  | 25.92 | 每天    | 30.00 | 10.00 | 散步   | 从不吸烟 |
| 153.00 | 54.00 | 89.00  | 23.07 | 不锻炼   |       |       |      | 从不吸烟 |
| 155.00 | 55.50 | 89.00  | 23.10 | 每天    | 30.00 | 8.00  | 散步   | 从不吸烟 |
| 154.00 | 52.00 | 73.00  | 21.93 | 每天    | 60.00 | 5.00  | 散步   | 从不吸烟 |
| 160.00 | 56.00 | 84.00  | 21.87 | 每天    | 60.00 | 9.00  | 散步   | 从不吸烟 |
| 148.00 | 54.10 | 97.00  | 24.70 | 每天    | 30.00 | 11.00 | 散步   | 从不吸烟 |
| 156.00 | 57.00 | 81.00  | 23.42 | 每天    | 30.00 | 16.00 | 打乒乓球 | 从不吸烟 |
| 152.50 | 48.70 | 84.00  | 20.94 | 每天    | 60.00 | 6.00  | 散步   | 从不吸烟 |
| 155.00 | 56.50 | 96.00  | 23.52 | 不锻炼   |       |       |      | 从不吸烟 |
| 144.00 | 52.00 | 92.00  | 25.08 | 每天    | 30.00 | 5.00  | 散步   | 从不吸烟 |
| 151.00 | 73.00 | 105.00 | 32.02 | 每天    | 30.00 | 10.00 | 散步   | 从不吸烟 |
| 148.00 | 58.00 | 100.00 | 26.48 | 不锻炼   |       |       |      | 从不吸烟 |
| 150.00 | 52.30 | 95.00  | 23.24 | 不锻炼   |       |       |      | 从不吸烟 |
| 158.00 | 59.00 | 88.00  | 23.63 | 不锻炼   |       |       |      | 从不吸烟 |
| 157.00 | 57.00 | 84.00  | 23.12 | 每天    | 60.00 | 7.00  | 跳舞   | 从不吸烟 |
| 148.00 | 46.00 | 84.00  | 21.00 | 每天    | 60.00 | 4.00  | 散步   | 吸烟   |
| 144.50 | 39.70 | 83.00  | 19.01 | 不锻炼   |       |       |      | 从不吸烟 |
| 145.00 | 48.00 | 78.00  | 22.83 | 每周一次↓ | 20.00 | 6.00  | 散步   | 从不吸烟 |
| 148.00 | 56.50 | 98.00  | 25.79 | 不锻炼   |       |       |      | 从不吸烟 |
| 143.00 | 52.00 | 85.00  | 25.43 | 每天    | 30.00 | 5.00  | 散步   | 从不吸烟 |
| 145.50 | 44.50 | 70.00  | 21.02 | 不锻炼   |       |       |      | 从不吸烟 |
| 149.00 | 45.00 | 74.00  | 20.27 | 每天    | 60.00 | 10.00 | 散步   | 从不吸烟 |
| 158.00 | 48.20 | 73.00  | 19.31 | 每天    | 60.00 | 5.00  | 散步   | 从不吸烟 |
| 157.00 | 63.00 | 91.00  | 25.56 | 每天    | 60.00 | 18.00 | 散步   | 从不吸烟 |
| 147.50 | 38.00 | 81.00  | 17.47 | 每天    | 30.00 | 3.00  | 散步   | 从不吸烟 |
| 148.50 | 37.30 | 77.00  | 16.91 | 不锻炼   |       |       |      | 从不吸烟 |
| 154.00 | 75.50 | 103.00 | 31.84 | 每天    | 60.00 | 5.00  | 散步   | 从不吸烟 |
| 145.00 | 48.00 | 82.00  | 22.83 | 不锻炼   |       |       |      | 从不吸烟 |
| 160.00 | 61.00 | 88.00  | 23.83 | 不锻炼   |       |       |      | 从不吸烟 |

|        |       |        |       |       |       |       |       |      |
|--------|-------|--------|-------|-------|-------|-------|-------|------|
| 156.50 | 44.70 | 77.00  | 18.25 | 每天    | 30.00 | 6.00  | 散步    | 从不吸烟 |
| 152.00 | 52.00 | 86.00  | 22.51 | 每周一次↓ | 30.00 | 2.00  | 散步    | 从不吸烟 |
| 152.00 | 53.00 | 84.00  | 22.94 | 每周一次↓ | 20.00 | 1.00  | 散步    | 吸烟   |
| 155.00 | 55.00 | 80.00  | 22.89 | 不锻炼   |       |       |       | 从不吸烟 |
| 146.00 | 43.00 | 85.00  | 20.17 | 不锻炼   |       |       |       | 从不吸烟 |
| 152.00 | 58.00 | 90.00  | 25.10 | 每天    | 30.00 | 10.00 | 散步    | 从不吸烟 |
| 150.00 | 58.00 | 97.00  | 25.78 | 不锻炼   |       |       |       | 从不吸烟 |
| 146.00 | 43.00 | 78.00  | 20.17 | 每天    | 30.00 | 1.00  | 散步    | 从不吸烟 |
| 151.00 | 62.00 | 91.00  | 27.19 | 每天    | 60.00 | 5.00  | 散步    | 从不吸烟 |
| 148.00 | 62.00 | 96.00  | 28.31 | 不锻炼   |       |       |       | 从不吸烟 |
| 144.00 | 35.00 | 60.00  | 16.88 | 不锻炼   |       |       |       | 从不吸烟 |
| 150.00 | 51.50 | 82.00  | 22.89 | 每天    | 30.00 | 10.00 | 散步、跳舞 | 从不吸烟 |
| 154.00 | 65.00 | 98.00  | 27.41 | 每天    | 60.00 | 1.00  | 跳舞    | 从不吸烟 |
| 150.00 | 46.50 | 75.00  | 20.67 | 每周一次↓ | 30.00 | 4.00  | 散步    | 从不吸烟 |
| 151.00 | 47.00 | 83.00  | 20.61 | 不锻炼   |       |       |       | 从不吸烟 |
| 158.00 | 43.85 | 62.00  | 17.57 | 每天    | 30.00 | 2.00  | 散步    | 从不吸烟 |
| 153.00 | 52.50 | 79.00  | 22.43 | 每天    | 30.00 | 1.00  | 散步    | 从不吸烟 |
| 150.00 | 71.00 | 104.00 | 31.56 | 每周一次↓ | 30.00 | 5.00  | 散步    | 从不吸烟 |
| 159.00 | 78.00 | 102.00 | 30.85 | 每天    | 60.00 | 7.00  | 散步    | 从不吸烟 |
| 136.00 | 57.40 | 90.00  | 31.03 | 每天    | 30.00 | 6.00  | 散步    | 从不吸烟 |
| 144.00 | 57.00 | 96.00  | 27.49 | 每天    | 30.00 | 10.00 | 散步    | 从不吸烟 |
| 153.00 | 49.00 | 80.00  | 20.93 | 每天    | 30.00 | 4.00  | 散步    | 从不吸烟 |
| 140.00 | 47.50 | 87.00  | 24.23 | 不锻炼   |       |       |       | 从不吸烟 |
| 154.50 | 49.00 | 81.00  | 20.53 | 每周一次↓ | 30.00 | 3.00  | 散步    | 从不吸烟 |
| 160.00 | 47.00 | 80.00  | 18.36 | 不锻炼   |       |       |       | 从不吸烟 |
| 145.00 | 57.00 | 90.00  | 27.11 | 每天    | 60.00 | 6.00  | 散步    | 从不吸烟 |
| 142.00 | 37.20 | 70.00  | 18.45 | 每天    | 60.00 | 1.00  | 骑自行车  | 从不吸烟 |
| 154.00 | 62.00 | 85.00  | 26.14 | 每天    | 15.00 | 5.00  | 散步    | 从不吸烟 |
| 155.00 | 61.00 | 88.00  | 25.39 | 每天    | 60.00 | 5.00  | 散步    | 从不吸烟 |
| 158.00 | 65.50 | 93.00  | 26.24 | 不锻炼   |       |       |       | 从不吸烟 |
| 158.00 | 63.00 | 91.00  | 25.24 | 每天    | 60.00 | 3.00  | 散步    | 从不吸烟 |
| 154.00 | 53.00 | 84.00  | 22.35 | 每天    | 30.00 | 5.00  | 散步    | 从不吸烟 |
| 158.00 | 62.00 | 90.00  | 24.84 | 每天    | 60.00 | 4.00  | 散步    | 从不吸烟 |
| 153.00 | 40.30 | 69.00  | 17.22 | 每天    | 90.00 | 12.00 | 散步    | 从不吸烟 |
| 148.00 | 50.00 | 84.00  | 22.83 | 每周一次↓ | 25.00 | 1.00  | 散步    | 从不吸烟 |
| 151.00 | 52.20 | 73.00  | 22.89 | 不锻炼   |       |       |       | 从不吸烟 |
| 151.00 | 58.00 | 89.00  | 25.44 | 每天    | 60.00 | 3.00  | 散步    | 从不吸烟 |
| 153.00 | 66.50 | 86.00  | 28.41 | 每天    | 60.00 | 5.00  | 散步    | 从不吸烟 |
| 149.00 | 55.50 | 85.00  | 25.00 | 每天    | 30.00 | 3.00  | 散步    | 从不吸烟 |
| 143.00 | 41.00 | 72.00  | 20.05 | 每天    | 30.00 | 9.00  | 散步    | 从不吸烟 |
| 151.00 | 54.00 | 83.00  | 23.68 | 每天    | 45.00 | 4.00  | 散步    | 从不吸烟 |
| 150.00 | 60.50 | 91.00  | 26.89 | 每天    | 30.00 | 3.00  | 散步    | 从不吸烟 |
| 151.00 | 47.00 | 84.00  | 20.61 | 不锻炼   |       |       |       | 从不吸烟 |
| 143.00 | 58.90 | 93.00  | 28.80 | 每周一次↓ | 30.00 | 2.00  | 散步    | 从不吸烟 |
| 152.00 | 46.30 | 76.00  | 20.04 | 每天    | 30.00 | 8.00  | 散步    | 从不吸烟 |
| 149.00 | 67.00 | 94.00  | 30.18 | 每天    | 30.00 | 4.00  | 散步    | 从不吸烟 |
| 158.00 | 55.20 | 80.00  | 22.11 | 每周一次↓ | 60.00 | 1.00  | 散步    | 从不吸烟 |
| 138.50 | 49.30 | 80.00  | 25.70 | 每天    | 60.00 | 4.00  | 散步    | 从不吸烟 |
| 147.00 | 44.00 | 70.00  | 20.36 | 每天    | 60.00 | 2.00  | 散步    | 从不吸烟 |
| 152.40 | 56.40 | 88.00  | 24.28 | 不锻炼   |       |       |       | 从不吸烟 |
| 147.00 | 45.00 | 83.00  | 20.82 | 每天    | 30.00 | 2.00  | 散步    | 从不吸烟 |

|        |       |        |       |       |       |       |     |      |
|--------|-------|--------|-------|-------|-------|-------|-----|------|
| 159.00 | 54.00 | 80.00  | 21.36 | 不锻炼   |       |       |     | 从不吸烟 |
| 147.50 | 56.50 | 88.00  | 25.97 | 不锻炼   |       |       |     | 从不吸烟 |
| 160.00 | 67.00 | 90.00  | 26.17 | 每天    | 30.00 | 1.00  | 散步  | 从不吸烟 |
| 144.00 | 50.50 | 82.50  | 24.35 | 每天    | 30.00 | 3.00  | 散步  | 从不吸烟 |
| 154.00 | 47.50 | 80.00  | 20.03 | 每天    | 30.00 | 12.00 | 散步  | 从不吸烟 |
| 156.00 | 61.00 | 91.00  | 25.07 | 每天    | 30.00 | 10.00 | 散步  | 从不吸烟 |
| 158.00 | 65.00 | 96.00  | 26.04 | 每天    | 60.00 | 2.00  | 散步  | 从不吸烟 |
| 156.00 | 64.00 | 85.00  | 26.30 | 每天    | 30.00 | 5.00  | 散步  | 从不吸烟 |
| 147.50 | 54.00 | 88.00  | 24.82 | 每天    | 60.00 | 3.00  | 散步  | 从不吸烟 |
| 149.00 | 55.00 | 80.00  | 24.77 | 不锻炼   |       |       |     | 从不吸烟 |
| 155.00 | 59.00 | 82.00  | 24.56 | 每天    | 30.00 | 9.00  | 散步  | 从不吸烟 |
| 152.00 | 49.50 | 76.00  | 21.42 | 每天    | 30.00 | 1.00  | 散步  | 从不吸烟 |
| 152.00 | 51.80 | 86.00  | 22.42 | 不锻炼   |       |       |     | 从不吸烟 |
| 158.50 | 54.00 | 78.00  | 21.49 | 不锻炼   |       |       |     | 从不吸烟 |
| 156.00 | 44.00 | 78.00  | 18.08 | 不锻炼   |       |       |     | 从不吸烟 |
| 156.00 | 63.00 | 78.00  | 25.89 | 每天    | 60.00 | 1.00  | 打太极 | 从不吸烟 |
| 150.00 | 59.00 | 90.00  | 26.22 | 每周一次↓ | 30.00 | 1.00  | 散步  | 从不吸烟 |
| 150.00 | 58.40 | 88.00  | 25.96 | 每天    | 30.00 | 7.00  | 散步  | 从不吸烟 |
| 153.00 | 63.00 | 93.00  | 26.91 | 每天    | 30.00 | 1.00  | 散步  | 从不吸烟 |
| 151.00 | 63.90 | 95.00  | 28.03 | 每天    | 45.00 | 3.00  | 散步  | 从不吸烟 |
| 153.00 | 47.00 | 79.00  | 20.08 | 不锻炼   |       |       |     | 从不吸烟 |
| 143.00 | 46.00 | 71.00  | 22.49 | 每天    | 60.00 | 4.00  | 散步  | 从不吸烟 |
| 157.00 | 49.50 | 75.00  | 20.08 | 每天    | 30.00 | 4.00  | 散步  | 从不吸烟 |
| 154.50 | 56.00 | 81.00  | 23.46 | 每天    | 30.00 | 10.00 | 散步  | 从不吸烟 |
| 143.00 | 69.00 | 96.00  | 33.74 | 每天    | 30.00 | 1.00  | 散步  | 从不吸烟 |
| 148.00 | 54.00 | 89.00  | 24.65 | 每天    | 60.00 | 8.00  | 散步  | 从不吸烟 |
| 146.00 | 54.70 | 95.00  | 25.66 | 不锻炼   |       |       |     | 从不吸烟 |
| 154.00 | 59.00 | 89.00  | 24.88 | 每天    | 60.00 | 12.00 | 散步  | 从不吸烟 |
| 142.00 | 46.00 | 82.00  | 22.81 | 每天    | 60.00 | 6.00  | 散步  | 从不吸烟 |
| 135.00 | 41.00 | 86.00  | 22.50 | 每天    | 20.00 | 11.00 | 散步  | 从不吸烟 |
| 149.00 | 49.90 | 75.50  | 22.48 | 每天    | 30.00 | 1.00  | 做体操 | 吸烟   |
| 153.00 | 49.50 | 78.00  | 21.15 | 不锻炼   |       |       |     | 从不吸烟 |
| 146.00 | 43.00 | 77.00  | 20.17 | 每天    | 30.00 | 12.00 | 散步  | 从不吸烟 |
| 164.00 | 65.00 | 96.00  | 24.17 | 不锻炼   |       |       |     | 从不吸烟 |
| 148.00 | 65.00 | 100.00 | 29.67 | 每天    | 60.00 | 5.00  | 散步  | 从不吸烟 |
| 156.00 | 56.00 | 83.00  | 23.01 | 每天    | 30.00 | 8.00  | 散步  | 从不吸烟 |
| 153.00 | 54.00 | 84.00  | 23.07 | 每天    | 60.00 | 12.00 | 散步  | 从不吸烟 |
| 156.00 | 70.00 | 97.00  | 28.76 | 每天    | 20.00 | 12.00 | 做操  | 从不吸烟 |
| 152.00 | 73.00 | 95.00  | 31.60 | 每天    | 30.00 | 3.00  | 散步  | 从不吸烟 |
| 146.00 | 60.00 | 89.00  | 28.15 | 每天    | 60.00 | 9.00  | 散步  | 从不吸烟 |
| 140.00 | 40.00 | 74.00  | 20.41 | 不锻炼   |       |       |     | 从不吸烟 |
| 141.00 | 61.50 | 85.00  | 30.93 | 不锻炼   |       |       |     | 从不吸烟 |
| 154.00 | 70.00 | 94.00  | 29.52 | 每天    | 60.00 | 8.00  | 散步  | 从不吸烟 |
| 147.00 | 46.00 | 74.00  | 21.29 | 每天    | 60.00 | 1.00  | 散步  | 从不吸烟 |
| 146.00 | 51.00 | 82.00  | 23.93 | 不锻炼   |       |       |     | 从不吸烟 |
| 151.00 | 78.90 | 102.00 | 34.60 | 不锻炼   |       |       |     | 从不吸烟 |
| 146.00 | 53.00 | 90.00  | 24.86 | 不锻炼   |       |       |     | 从不吸烟 |
| 146.00 | 52.00 | 86.00  | 24.39 | 每天    | 30.00 | 2.00  | 散步  | 从不吸烟 |
| 145.00 | 51.00 | 80.00  | 24.26 | 每天    | 30.00 | 11.00 | 散步  | 从不吸烟 |
| 148.00 | 52.00 | 88.00  | 23.74 | 每天    | 30.00 | 12.00 | 散步  | 从不吸烟 |
| 154.00 | 47.00 | 77.00  | 19.82 | 每天    | 20.00 | 12.00 | 散步  | 从不吸烟 |

|        |       |        |       |       |       |       |    |      |
|--------|-------|--------|-------|-------|-------|-------|----|------|
| 154.00 | 59.00 | 90.00  | 24.88 | 每天    | 60.00 | 5.00  | 散步 | 从不吸烟 |
| 154.00 | 64.50 | 90.00  | 27.20 | 每天    | 60.00 | 2.00  | 散步 | 从不吸烟 |
| 145.00 | 49.00 | 90.00  | 23.31 | 不锻炼   |       |       |    | 从不吸烟 |
| 157.00 | 58.00 | 86.00  | 23.53 | 每天    | 30.00 | 3.00  | 散步 | 从不吸烟 |
| 155.00 | 79.00 | 107.00 | 32.88 | 每天    | 30.00 | 2.00  | 散步 | 从不吸烟 |
| 155.00 | 63.70 | 90.00  | 26.51 | 不锻炼   |       |       |    | 从不吸烟 |
| 153.00 | 58.00 | 87.00  | 24.78 | 每天    | 30.00 | 1.00  | 散步 | 从不吸烟 |
| 156.00 | 60.00 | 86.00  | 24.65 | 不锻炼   |       |       |    | 从不吸烟 |
| 153.00 | 65.00 | 88.00  | 27.77 | 每天    | 60.00 | 3.00  | 散步 | 从不吸烟 |
| 156.50 | 55.50 | 73.00  | 22.66 | 每天    | 30.00 | 3.00  | 散步 | 从不吸烟 |
| 154.00 | 68.00 | 85.00  | 28.67 | 每天    | 30.00 | 1.00  | 散步 | 从不吸烟 |
| 155.00 | 60.00 | 90.00  | 24.97 | 每天    | 60.00 | 12.00 | 跳舞 | 从不吸烟 |
| 160.00 | 57.60 | 90.00  | 22.50 | 每天    | 60.00 | 2.00  | 散步 | 从不吸烟 |
| 155.00 | 60.00 | 85.00  | 24.97 | 不锻炼   |       |       |    | 从不吸烟 |
| 150.00 | 65.00 | 94.00  | 28.89 | 不锻炼   |       |       |    | 从不吸烟 |
| 152.00 | 61.00 | 94.00  | 26.40 | 不锻炼   |       |       |    | 从不吸烟 |
| 158.00 | 63.00 | 91.00  | 25.24 | 每天    | 30.00 | 6.00  | 散步 | 从不吸烟 |
| 159.00 | 69.00 | 92.00  | 27.29 | 每天    | 60.00 | 17.00 | 做操 | 从不吸烟 |
| 153.00 | 65.00 | 100.00 | 27.77 | 不锻炼   |       |       |    | 从不吸烟 |
| 151.00 | 56.00 | 84.00  | 24.56 | 每天    | 30.00 | 10.00 | 散步 | 从不吸烟 |
| 154.00 | 48.50 | 77.00  | 20.45 | 不锻炼   |       |       |    | 从不吸烟 |
| 155.00 | 58.00 | 96.20  | 24.14 | 每天    | 10.00 | 2.00  | 散步 | 从不吸烟 |
| 164.00 | 63.00 | 90.00  | 23.42 | 每天    | 60.00 | 1.00  | 散步 | 从不吸烟 |
| 156.50 | 38.90 | 58.00  | 15.88 | 每天    | 30.00 | 10.00 | 散步 | 从不吸烟 |
| 153.00 | 65.00 | 94.00  | 27.77 | 每周一次! | 30.00 | 1.00  | 散步 | 从不吸烟 |
| 132.00 | 31.65 | 70.00  | 18.16 | 每天    | 30.00 | 6.00  | 散步 | 从不吸烟 |
| 146.00 | 47.00 | 79.00  | 22.05 | 每天    | 60.00 | 11.00 | 散步 | 从不吸烟 |
| 146.00 | 58.20 | 98.00  | 27.30 | 每天    | 60.00 | 5.00  | 散步 | 从不吸烟 |
| 150.00 | 40.00 | 76.00  | 17.78 | 每天    | 30.00 | 1.00  | 散步 | 从不吸烟 |
| 135.00 | 43.00 | 90.00  | 23.59 | 每天    | 30.00 | 1.00  | 散步 | 从不吸烟 |
| 149.00 | 47.00 | 77.00  | 21.17 | 每天    | 30.00 | 5.00  | 散步 | 从不吸烟 |
| 162.00 | 52.00 | 80.00  | 19.81 | 每天    | 60.00 | 3.00  | 散步 | 从不吸烟 |
| 158.00 | 49.80 | 83.00  | 19.95 | 每天    | 30.00 | 6.00  | 散步 | 从不吸烟 |
| 154.00 | 49.40 | 79.00  | 20.83 | 每天    | 30.00 | 4.00  | 散步 | 从不吸烟 |
| 146.00 | 56.00 | 92.00  | 26.27 | 每天    | 60.00 | 2.00  | 散步 | 从不吸烟 |
| 152.00 | 64.00 | 100.00 | 27.70 | 每天    | 30.00 | 5.00  | 散步 | 从不吸烟 |
| 156.00 | 43.00 | 73.00  | 17.67 | 每天    | 60.00 | 2.00  | 散步 | 从不吸烟 |
| 158.00 | 84.00 | 117.00 | 33.65 | 每天    | 30.00 | 2.00  | 散步 | 从不吸烟 |
| 146.00 | 42.00 | 76.00  | 19.70 | 不锻炼   |       |       |    | 从不吸烟 |
| 153.50 | 34.00 | 60.00  | 14.43 | 每天    | 30.00 | 1.00  | 散步 | 从不吸烟 |
| 145.00 | 56.00 | 86.00  | 26.63 | 不锻炼   |       |       |    | 从不吸烟 |
| 156.00 | 50.00 | 76.00  | 20.55 | 每天    | 60.00 | 6.00  | 散步 | 从不吸烟 |
| 144.00 | 49.00 | 89.00  | 23.63 | 每天    | 30.00 | 10.00 | 散步 | 从不吸烟 |
| 146.00 | 56.70 | 86.00  | 26.60 | 每天    | 30.00 | 6.00  | 散步 | 从不吸烟 |
| 152.00 | 57.00 | 89.00  | 24.67 | 不锻炼   |       |       |    | 从不吸烟 |
| 152.20 | 57.50 | 90.00  | 24.82 | 每天    | 30.00 | 4.00  | 散步 | 从不吸烟 |
| 158.00 | 50.00 | 73.00  | 20.03 | 每天    | 60.00 | 2.00  | 散步 | 从不吸烟 |
| 145.00 | 48.50 | 76.00  | 23.07 | 每天    | 30.00 | 2.00  | 散步 | 从不吸烟 |
| 143.00 | 44.50 | 74.00  | 21.76 | 每天    | 60.00 | 5.00  | 散步 | 从不吸烟 |
| 146.50 | 57.30 | 90.00  | 26.70 | 每天    | 30.00 | 5.00  | 散步 | 从不吸烟 |
| 156.00 | 86.00 | 112.00 | 35.34 | 每天    | 30.00 | 1.00  | 散步 | 从不吸烟 |

|        |       |        |       |       |       |       |     |      |
|--------|-------|--------|-------|-------|-------|-------|-----|------|
| 150.00 | 43.10 | 71.00  | 19.16 | 不锻炼   |       |       |     | 从不吸烟 |
| 150.00 | 57.30 | 88.00  | 25.47 | 每天    | 30.00 | 5.00  | 散步  | 从不吸烟 |
| 156.00 | 68.15 | 89.00  | 28.00 | 每天    | 60.00 | 2.00  | 散步  | 从不吸烟 |
| 151.00 | 48.00 | 82.00  | 21.05 | 不锻炼   |       |       |     | 从不吸烟 |
| 148.00 | 46.00 | 78.00  | 21.00 | 每天    | 60.00 | 3.00  | 散步  | 从不吸烟 |
| 146.00 | 51.00 | 85.00  | 23.93 | 不锻炼   |       |       |     | 从不吸烟 |
| 150.00 | 56.00 | 81.00  | 24.89 | 每周一次↓ | 30.00 | 1.00  | 散步  | 从不吸烟 |
| 162.00 | 61.00 | 90.00  | 23.24 | 每天    | 60.00 | 5.00  | 散步  | 从不吸烟 |
| 157.50 | 56.00 | 89.00  | 22.57 | 每天    | 60.00 | 3.00  | 散步  | 从不吸烟 |
| 157.00 | 69.00 | 102.00 | 27.99 | 每周一次↓ | 30.00 | 20.00 | 散步  | 从不吸烟 |
| 144.00 | 39.00 | 73.00  | 18.81 | 每天    | 30.00 | 16.00 | 散步  | 从不吸烟 |
| 135.00 | 43.00 | 80.00  | 23.59 | 每天    | 60.00 | 12.00 | 散步  | 从不吸烟 |
| 148.00 | 47.00 | 80.00  | 21.46 | 每天    | 60.00 | 7.00  | 散步  | 从不吸烟 |
| 147.00 | 59.00 | 95.00  | 27.30 | 每天    | 50.00 | 1.00  | 散步  | 从不吸烟 |
| 148.00 | 67.00 | 100.00 | 30.59 | 每天    | 30.00 | 11.00 | 散步  | 从不吸烟 |
| 156.50 | 57.70 | 94.00  | 23.56 | 每天    | 40.00 | 5.00  | 散步  | 从不吸烟 |
| 159.00 | 62.00 | 94.00  | 24.52 | 不锻炼   |       |       |     | 从不吸烟 |
| 146.00 | 45.30 | 72.00  | 21.25 | 不锻炼   |       |       |     | 从不吸烟 |
| 148.00 | 62.00 | 93.00  | 28.31 | 每周一次↓ | 60.00 | 5.00  | 散步  | 从不吸烟 |
| 156.00 | 52.50 | 75.00  | 21.57 | 每天    | 45.00 | 2.00  | 散步  | 从不吸烟 |
| 161.00 | 47.70 | 77.00  | 18.40 | 每天    | 30.00 | 1.00  | 散步  | 从不吸烟 |
| 164.00 | 50.00 | 87.00  | 18.59 | 每天    | 60.00 | 7.00  | 散步  | 从不吸烟 |
| 143.00 | 49.00 | 78.00  | 23.96 | 每天    | 30.00 | 1.00  | 散步  | 从不吸烟 |
| 147.00 | 49.90 | 78.00  | 23.09 | 每天    | 60.00 | 5.00  | 散步  | 从不吸烟 |
| 141.00 | 42.50 | 73.00  | 21.38 | 每天    | 30.00 | 1.00  | 散步  | 从不吸烟 |
| 148.00 | 68.00 | 104.00 | 31.04 | 不锻炼   |       |       |     | 从不吸烟 |
| 157.00 | 52.00 | 81.00  | 21.10 | 不锻炼   |       |       |     | 从不吸烟 |
| 145.00 | 60.00 | 92.00  | 28.54 | 不锻炼   |       |       |     | 从不吸烟 |
| 149.00 | 54.50 | 77.00  | 24.55 | 每天    | 30.00 | 1.00  | 散步  | 从不吸烟 |
| 150.00 | 54.00 | 90.00  | 24.00 | 不锻炼   |       |       |     | 从不吸烟 |
| 158.50 | 64.80 | 94.00  | 25.79 | 不锻炼   |       |       |     | 从不吸烟 |
| 150.50 | 40.10 | 69.00  | 17.70 | 每天    | 30.00 | 2.00  | 散步  | 从不吸烟 |
| 147.00 | 54.00 | 82.00  | 24.99 | 每周一次↓ | 20.00 | 22.00 | 散步  | 从不吸烟 |
| 147.00 | 55.20 | 88.00  | 25.54 | 每天    | 30.00 | 1.00  | 散步  | 从不吸烟 |
| 160.00 | 54.50 | 78.00  | 21.29 | 不锻炼   |       |       |     | 从不吸烟 |
| 154.50 | 44.65 | 63.00  | 18.71 | 每天    | 60.00 | 7.00  | 散步  | 从不吸烟 |
| 148.00 | 52.00 | 78.00  | 23.74 | 每天    | 60.00 | 10.00 | 散步  | 从不吸烟 |
| 157.00 | 46.00 | 69.00  | 18.66 | 不锻炼   |       |       |     | 从不吸烟 |
| 162.00 | 50.10 | 83.00  | 19.09 | 每天    | 60.00 | 5.00  | 散步  | 从不吸烟 |
| 157.00 | 56.00 | 80.00  | 22.72 | 每天    | 30.00 | 10.00 | 散步  | 从不吸烟 |
| 155.00 | 58.00 | 86.00  | 24.14 | 每天    | 30.00 | 5.00  | 散步  | 从不吸烟 |
| 150.00 | 60.00 | 84.00  | 26.67 | 不锻炼   |       |       |     | 从不吸烟 |
| 157.00 | 74.00 | 105.00 | 30.02 | 每天    | 60.00 | 12.00 | 散步  | 从不吸烟 |
| 154.00 | 54.10 | 81.00  | 22.81 | 每天    | 60.00 | 3.00  | 健身操 | 从不吸烟 |
| 154.00 | 55.00 | 92.00  | 23.19 | 每天    | 30.00 | 5.00  | 散步  | 从不吸烟 |
| 143.00 | 52.20 | 85.00  | 25.53 | 每天    | 30.00 | 5.00  | 散步  | 从不吸烟 |
| 160.00 | 57.00 | 81.00  | 22.27 | 每周一次↓ | 30.00 | 2.00  | 散步  | 从不吸烟 |
| 150.00 | 58.00 | 89.00  | 25.78 | 不锻炼   |       |       |     | 从不吸烟 |
| 153.00 | 65.00 | 89.00  | 27.77 | 每天    | 60.00 | 3.00  | 散步  | 从不吸烟 |
| 150.00 | 57.00 | 89.00  | 25.33 | 每天    | 60.00 | 11.00 | 散步  | 从不吸烟 |
| 152.00 | 54.00 | 88.00  | 23.37 | 每天    | 60.00 | 6.00  | 散步  | 从不吸烟 |

|        |       |        |       |       |       |       |     |      |
|--------|-------|--------|-------|-------|-------|-------|-----|------|
| 153.00 | 55.00 | 80.00  | 23.50 | 每天    | 30.00 | 12.00 | 散步  | 从不吸烟 |
| 163.00 | 64.00 | 95.00  | 24.09 | 每天    | 60.00 | 4.00  | 打太极 | 从不吸烟 |
| 140.00 | 40.00 | 78.00  | 20.41 | 每天    | 60.00 | 21.00 | 散步  | 从不吸烟 |
| 161.00 | 63.00 | 89.00  | 24.30 | 每天    | 30.00 | 1.00  | 散步  | 从不吸烟 |
| 148.00 | 41.00 | 84.00  | 18.72 | 不锻炼   |       |       |     | 从不吸烟 |
| 156.00 | 52.00 | 72.00  | 21.37 | 每天    | 60.00 | 11.00 | 散步  | 从不吸烟 |
| 146.00 | 42.00 | 80.00  | 19.70 | 每天    | 60.00 | 2.00  | 散步  | 从不吸烟 |
| 152.00 | 65.00 | 94.00  | 28.13 | 每天    | 30.00 | 5.00  | 散步  | 从不吸烟 |
| 161.00 | 61.00 | 84.00  | 23.53 | 不锻炼   |       |       |     | 从不吸烟 |
| 142.00 | 39.50 | 77.00  | 19.59 | 不锻炼   |       |       |     | 从不吸烟 |
| 148.00 | 51.00 | 86.00  | 23.28 | 每天    | 60.00 | 20.00 | 散步  | 从不吸烟 |
| 154.00 | 50.00 | 77.00  | 21.08 | 每天    | 60.00 | 5.00  | 散步  | 从不吸烟 |
| 148.00 | 38.00 | 65.00  | 17.35 | 不锻炼   |       |       |     | 从不吸烟 |
| 153.00 | 52.00 | 78.00  | 22.21 | 不锻炼   |       |       |     | 从不吸烟 |
| 150.00 | 57.00 | 87.00  | 25.33 | 每天    | 60.00 | 22.00 | 散步  | 从不吸烟 |
| 153.00 | 44.00 | 76.00  | 18.80 | 不锻炼   |       |       |     | 从不吸烟 |
| 142.00 | 46.50 | 79.00  | 23.06 | 每天    | 60.00 | 3.00  | 散步  | 从不吸烟 |
| 157.00 | 57.00 | 82.00  | 23.12 | 每天    | 30.00 | 3.00  | 散步  | 从不吸烟 |
| 154.50 | 60.70 | 95.00  | 25.43 | 每天    | 30.00 | 1.00  | 散步  | 从不吸烟 |
| 149.00 | 49.00 | 76.00  | 22.07 | 每天    | 60.00 | 8.00  | 散步  | 吸烟   |
| 147.00 | 37.00 | 65.00  | 17.12 | 每天    | 60.00 | 1.00  | 散步  | 从不吸烟 |
| 153.00 | 38.00 | 63.00  | 16.23 | 每天    | 30.00 | 5.00  | 散步  | 从不吸烟 |
| 151.00 | 47.00 | 82.00  | 20.61 | 每天    | 60.00 | 1.00  | 散步  | 从不吸烟 |
| 154.00 | 54.00 | 88.00  | 22.77 | 每天    | 30.00 | 5.00  | 散步  | 从不吸烟 |
| 150.00 | 43.00 | 76.00  | 19.11 | 不锻炼   |       |       |     | 从不吸烟 |
| 158.00 | 67.00 | 97.00  | 26.84 | 每周一次! | 30.00 | 1.00  | 散步  | 从不吸烟 |
| 159.00 | 60.00 | 98.00  | 23.73 | 每周一次! | 30.00 | 6.00  | 散步  | 从不吸烟 |
| 146.00 | 51.00 | 77.00  | 23.93 | 每天    | 60.00 | 23.00 | 散步  | 从不吸烟 |
| 142.00 | 52.00 | 84.00  | 25.79 | 每天    | 60.00 | 10.00 | 散步  | 从不吸烟 |
| 144.50 | 38.45 | 63.00  | 18.41 | 不锻炼   |       |       |     | 从不吸烟 |
| 131.00 | 56.00 | 92.00  | 32.63 | 每天    | 30.00 | 7.00  | 散在  | 从不吸烟 |
| 145.00 | 56.00 | 84.00  | 26.63 | 不锻炼   |       |       |     | 从不吸烟 |
| 138.00 | 43.00 | 81.00  | 22.58 | 不锻炼   |       |       |     | 从不吸烟 |
| 151.50 | 55.50 | 81.00  | 24.18 | 不锻炼   |       |       |     | 从不吸烟 |
| 146.50 | 42.50 | 78.00  | 19.80 | 每天    | 30.00 | 3.00  | 散步  | 从不吸烟 |
| 158.00 | 62.00 | 93.00  | 24.84 | 每天    | 60.00 | 2.00  | 散步  | 从不吸烟 |
| 158.00 | 51.00 | 83.00  | 20.43 | 不锻炼   |       |       |     | 从不吸烟 |
| 154.00 | 57.00 | 88.00  | 24.03 | 每天    | 60.00 | 2.00  | 散步  | 从不吸烟 |
| 153.00 | 49.00 | 77.00  | 20.93 | 每天    | 60.00 | 1.00  | 散步  | 从不吸烟 |
| 150.00 | 45.00 | 78.00  | 20.00 | 不锻炼   |       |       |     | 从不吸烟 |
| 150.00 | 68.00 | 107.00 | 30.22 | 每天    | 60.00 | 1.00  | 散步  | 从不吸烟 |
| 146.00 | 57.00 | 91.00  | 26.74 | 不锻炼   |       |       |     | 从不吸烟 |
| 158.00 | 57.20 | 91.00  | 22.91 | 每天    | 30.00 | 3.00  | 散步  | 从不吸烟 |
| 152.00 | 55.10 | 83.00  | 23.85 | 每天    | 60.00 | 1.00  | 跳舞  | 从不吸烟 |
| 156.00 | 58.00 | 90.00  | 23.83 | 每天    | 60.00 | 7.00  | 散步  | 从不吸烟 |
| 155.00 | 54.00 | 78.00  | 22.48 | 每天    | 90.00 | 10.00 | 散步  | 从不吸烟 |
| 168.00 | 66.00 | 93.00  | 23.38 | 每天    | 30.00 | 4.00  | 散步  | 从不吸烟 |
| 156.00 | 69.00 | 97.00  | 28.35 | 每天    | 30.00 | 3.00  | 散步  | 从不吸烟 |
| 161.00 | 58.00 | 80.00  | 22.38 | 每天    | 40.00 | 17.00 | 散步  | 从不吸烟 |
| 145.00 | 54.00 | 83.00  | 25.68 | 每天    | 30.00 | 5.00  | 散步  | 从不吸烟 |
| 144.00 | 60.00 | 97.00  | 28.94 | 每天    | 60.00 | 9.00  | 散步  | 从不吸烟 |

|        |       |        |       |       |       |       |    |      |
|--------|-------|--------|-------|-------|-------|-------|----|------|
| 152.50 | 60.00 | 82.00  | 25.80 | 不锻炼   |       |       |    | 从不吸烟 |
| 145.00 | 53.60 | 82.00  | 25.49 | 每天    | 30.00 | 1.00  | 散步 | 从不吸烟 |
| 147.00 | 62.50 | 92.00  | 28.92 | 每天    | 30.00 | 10.00 | 散步 | 从不吸烟 |
| 158.00 | 60.00 | 92.00  | 24.03 | 每天    | 30.00 | 4.00  | 散步 | 从不吸烟 |
| 135.00 | 56.00 | 95.00  | 30.73 | 不锻炼   |       |       |    | 从不吸烟 |
| 145.00 | 34.00 | 70.00  | 16.17 | 不锻炼   |       |       |    | 从不吸烟 |
| 144.00 | 64.00 | 93.00  | 30.86 | 不锻炼   |       |       |    | 从不吸烟 |
| 153.00 | 63.00 | 94.00  | 26.91 | 不锻炼   |       |       |    | 从不吸烟 |
| 157.00 | 71.00 | 97.00  | 28.80 | 每天    | 60.00 | 5.00  | 散步 | 从不吸烟 |
| 140.00 | 52.10 | 86.00  | 26.58 | 不锻炼   |       |       |    | 从不吸烟 |
| 141.00 | 47.00 | 86.00  | 23.64 | 每天    | 30.00 | 4.00  | 散步 | 从不吸烟 |
| 148.00 | 60.00 | 97.00  | 27.39 | 不锻炼   |       |       |    | 吸烟   |
| 139.00 | 46.00 | 84.00  | 23.81 | 每天    | 60.00 | 2.00  | 跳舞 | 从不吸烟 |
| 150.00 | 55.00 | 91.00  | 24.44 | 每天    | 30.00 | 3.00  | 做操 | 从不吸烟 |
| 143.00 | 61.00 | 89.00  | 29.83 | 不锻炼   |       |       |    | 从不吸烟 |
| 154.00 | 63.00 | 98.00  | 26.56 | 不锻炼   |       |       |    | 从不吸烟 |
| 161.00 | 52.00 | 76.00  | 20.06 | 每周一次! | 30.00 | 10.00 | 散步 | 从不吸烟 |
| 148.00 | 48.00 | 80.00  | 21.91 | 每天    | 30.00 | 1.00  | 散步 | 从不吸烟 |
| 146.00 | 48.50 | 82.00  | 22.75 | 每天    | 60.00 | 12.00 | 跳舞 | 从不吸烟 |
| 142.00 | 45.00 | 86.00  | 22.32 | 每天    | 60.00 | 4.00  | 散步 | 从不吸烟 |
| 152.00 | 56.00 | 91.00  | 24.24 | 每天    | 30.00 | 3.00  | 散步 | 从不吸烟 |
| 138.50 | 56.70 | 88.00  | 29.56 | 不锻炼   |       |       |    | 从不吸烟 |
| 152.00 | 60.00 | 87.00  | 25.97 | 每天    | 60.00 | 1.00  | 散步 | 从不吸烟 |
| 158.00 | 63.50 | 92.00  | 25.44 | 每天    | 30.00 | 1.00  | 散步 | 从不吸烟 |
| 155.00 | 62.00 | 97.00  | 25.81 | 不锻炼   |       |       |    | 从不吸烟 |
| 142.50 | 37.70 | 70.00  | 18.57 | 每天    | 30.00 | 6.00  | 散步 | 从不吸烟 |
| 162.00 | 74.00 | 101.00 | 28.20 | 每天    | 60.00 | 3.00  | 散步 | 从不吸烟 |
| 149.00 | 31.00 | 58.00  | 13.96 | 不锻炼   |       |       |    | 从不吸烟 |
| 155.00 | 73.50 | 108.00 | 30.59 | 每天    | 30.00 | 3.00  | 散步 | 从不吸烟 |
| 145.00 | 41.00 | 80.00  | 19.50 | 每天    | 30.00 | 2.00  | 散步 | 从不吸烟 |
| 156.50 | 68.70 | 101.00 | 28.05 | 每天    | 30.00 | 3.00  | 散步 | 从不吸烟 |
| 144.00 | 48.00 | 82.00  | 23.15 | 不锻炼   |       |       |    | 从不吸烟 |
| 148.00 | 48.00 | 80.00  | 21.91 | 每天    | 60.00 | 2.00  | 散步 | 从不吸烟 |
| 159.00 | 66.00 | 92.00  | 26.11 | 每天    | 60.00 | 6.00  | 散步 | 从不吸烟 |
| 155.00 | 49.00 | 76.00  | 20.40 | 每天    | 60.00 | 12.00 | 散步 | 从不吸烟 |
| 164.00 | 75.00 | 95.00  | 27.89 | 每天    | 60.00 | 8.00  | 散步 | 从不吸烟 |
| 155.00 | 66.00 | 94.00  | 27.47 | 每天    | 30.00 | 3.00  | 散步 | 从不吸烟 |
| 155.00 | 65.00 | 92.00  | 27.06 | 每天    | 60.00 | 1.00  | 散步 | 从不吸烟 |
| 151.00 | 50.00 | 77.00  | 21.93 | 不锻炼   |       |       |    | 从不吸烟 |
| 156.00 | 56.00 | 91.00  | 23.01 | 每天    | 60.00 | 10.00 | 散步 | 从不吸烟 |
| 147.00 | 57.00 | 92.00  | 26.38 | 每天    | 30.00 | 7.00  | 散步 | 从不吸烟 |
| 148.00 | 64.00 | 105.00 | 29.22 | 不锻炼   |       |       |    | 从不吸烟 |
| 146.00 | 48.00 | 78.00  | 22.52 | 不锻炼   |       |       |    | 从不吸烟 |
| 160.00 | 51.00 | 74.00  | 19.92 | 不锻炼   |       |       |    | 从不吸烟 |
| 160.00 | 65.00 | 89.00  | 25.39 | 每天    | 40.00 | 3.00  | 散步 | 从不吸烟 |
| 152.00 | 54.00 | 90.00  | 23.37 | 每天    | 30.00 | 3.00  | 散步 | 从不吸烟 |
| 152.00 | 50.00 | 70.00  | 21.64 | 不锻炼   |       |       |    | 从不吸烟 |
| 151.50 | 64.20 | 87.00  | 27.97 | 每天    | 30.00 | 1.00  | 散步 | 从不吸烟 |
| 150.00 | 69.00 | 100.00 | 30.67 | 每天    | 60.00 | 1.00  | 散步 | 从不吸烟 |
| 153.50 | 62.55 | 87.00  | 26.55 | 每周一次! | 30.00 | 5.00  | 散步 | 从不吸烟 |
| 143.00 | 36.50 | 70.00  | 17.85 | 每天    | 60.00 | 10.00 | 散步 | 从不吸烟 |

|        |       |        |       |       |        |       |       |      |
|--------|-------|--------|-------|-------|--------|-------|-------|------|
| 156.00 | 58.10 | 91.00  | 23.87 | 不锻炼   |        |       |       | 从不吸烟 |
| 160.00 | 53.00 | 84.00  | 20.70 | 每天    | 30.00  | 1.00  | 散步    | 从不吸烟 |
| 153.00 | 88.00 | 114.00 | 37.59 | 每天    | 60.00  | 11.00 | 散步    | 从不吸烟 |
| 151.00 | 42.00 | 65.00  | 18.42 | 每天    | 60.00  | 2.00  | 散步    | 从不吸烟 |
| 155.00 | 62.00 | 90.00  | 25.81 | 每周一次↓ | 30.00  | 2.00  | 散步    | 从不吸烟 |
| 163.00 | 65.00 | 98.00  | 24.46 | 每周一次↓ | 30.00  | 1.00  | 散步    | 从不吸烟 |
| 153.00 | 56.50 | 85.00  | 24.14 | 每周一次↓ | 30.00  | 2.00  | 散步    | 从不吸烟 |
| 152.00 | 44.00 | 73.00  | 19.04 | 每天    | 30.00  | 10.00 | 散步    | 从不吸烟 |
| 149.00 | 60.00 | 95.00  | 27.03 | 每天    | 60.00  | 4.00  | 散步    | 从不吸烟 |
| 152.50 | 61.40 | 88.00  | 26.40 | 每天    | 60.00  | 1.00  | 散步    | 从不吸烟 |
| 148.00 | 82.00 | 113.00 | 37.44 | 每周一次↓ | 30.00  | 3.00  | 散步    | 从不吸烟 |
| 152.00 | 50.00 | 76.00  | 21.64 | 不锻炼   |        |       |       | 从不吸烟 |
| 148.00 | 47.00 | 72.00  | 21.46 | 每天    | 30.00  | 3.00  | 散步    | 从不吸烟 |
| 146.00 | 55.00 | 68.00  | 25.80 | 每天    | 30.00  | 1.00  | 散步    | 从不吸烟 |
| 149.00 | 51.80 | 78.00  | 23.33 | 每天    | 60.00  | 10.00 | 散步    | 从不吸烟 |
| 152.00 | 64.00 | 89.00  | 27.70 | 每天    | 60.00  | 2.00  | 散步    | 从不吸烟 |
| 156.00 | 40.00 | 65.00  | 16.44 | 每天    | 60.00  | 8.00  | 散步    | 从不吸烟 |
| 147.00 | 58.00 | 90.00  | 26.84 | 每天    | 30.00  | 4.00  | 散步    | 从不吸烟 |
| 148.00 | 54.50 | 95.20  | 24.88 | 每天    | 120.00 | 2.00  | 跳舞    | 从不吸烟 |
| 157.50 | 68.40 | 97.00  | 27.57 | 每天    | 30.00  | 4.00  | 散步    | 从不吸烟 |
| 153.00 | 47.00 | 71.00  | 20.08 | 每天    | 30.00  | 6.00  | 散步    | 从不吸烟 |
| 147.00 | 59.00 | 93.00  | 27.30 | 不锻炼   |        |       |       | 从不吸烟 |
| 155.00 | 50.00 | 73.00  | 20.81 | 不锻炼   |        |       |       | 从不吸烟 |
| 152.00 | 76.00 | 110.00 | 32.89 | 不锻炼   |        |       |       | 从不吸烟 |
| 143.00 | 41.00 | 75.50  | 20.05 | 每周一次↓ | 30.00  | 2.00  | 散步    | 从不吸烟 |
| 152.00 | 55.00 | 84.00  | 23.81 | 每周一次↓ | 30.00  | 4.00  | 散步    | 从不吸烟 |
| 154.00 | 60.00 | 87.00  | 25.30 | 不锻炼   |        |       |       | 从不吸烟 |
| 153.00 | 43.00 | 70.00  | 18.37 | 每天    | 60.00  | 1.00  | 散步    | 从不吸烟 |
| 147.00 | 36.00 | 65.00  | 16.66 | 不锻炼   |        |       |       | 从不吸烟 |
| 155.00 | 61.00 | 83.00  | 25.39 | 每天    | 60.00  | 6.00  | 跳舞    | 从不吸烟 |
| 150.00 | 52.50 | 91.00  | 23.33 | 不锻炼   |        |       |       | 从不吸烟 |
| 145.00 | 56.65 | 95.00  | 26.94 | 每天    | 30.00  | 4.00  | 散步    | 从不吸烟 |
| 152.00 | 51.00 | 76.00  | 22.07 | 不锻炼   |        |       |       | 从不吸烟 |
| 150.00 | 58.00 | 88.00  | 25.78 | 每天    | 60.00  | 4.00  | 散步    | 从不吸烟 |
| 143.00 | 44.00 | 82.00  | 21.52 | 每周一次↓ | 20.00  | 2.00  | 散步    | 从不吸烟 |
| 142.00 | 33.00 | 70.00  | 16.37 | 不锻炼   |        |       |       | 从不吸烟 |
| 142.00 | 38.00 | 74.00  | 18.85 | 每周一次↓ | 30.00  | 1.00  | 散步    | 从不吸烟 |
| 157.00 | 62.00 | 82.00  | 25.15 | 每天    | 60.00  | 7.00  | 散步、跳舞 | 从不吸烟 |
| 145.00 | 51.50 | 91.00  | 24.49 | 每天    | 60.00  | 12.00 | 健身操   | 从不吸烟 |
| 151.00 | 54.00 | 86.00  | 23.68 | 每天    | 60.00  | 4.00  | 散步    | 从不吸烟 |
| 148.00 | 66.80 | 106.00 | 30.50 | 每天    | 60.00  | 8.00  | 散步    | 从不吸烟 |
| 148.00 | 49.00 | 82.00  | 22.37 | 每天    | 60.00  | 3.00  | 散步    | 从不吸烟 |
| 146.00 | 52.50 | 87.00  | 24.63 | 每天    | 30.00  | 4.00  | 散步    | 从不吸烟 |
| 150.00 | 64.00 | 98.00  | 28.44 | 每天    | 45.00  | 6.00  | 散步    | 从不吸烟 |
| 151.00 | 72.00 | 104.00 | 31.58 | 不锻炼   |        |       |       | 从不吸烟 |
| 157.00 | 59.40 | 87.00  | 24.10 | 每天    | 30.00  | 1.00  | 散步    | 从不吸烟 |
| 154.00 | 55.40 | 87.00  | 23.36 | 不锻炼   |        |       |       | 从不吸烟 |
| 141.50 | 36.50 | 58.00  | 18.23 | 不锻炼   |        |       |       | 从不吸烟 |
| 150.00 | 57.00 | 93.00  | 25.33 | 每天    | 60.00  | 2.00  | 散步    | 从不吸烟 |
| 149.00 | 48.50 | 82.60  | 21.85 | 每周一次↓ | 20.00  | 4.00  | 散步    | 从不吸烟 |
| 150.00 | 58.00 | 90.00  | 25.78 | 每天    | 30.00  | 1.00  | 健身操   | 从不吸烟 |

|        |       |        |       |       |       |       |    |      |
|--------|-------|--------|-------|-------|-------|-------|----|------|
| 151.00 | 60.00 | 84.00  | 26.31 | 每周一次↓ | 30.00 | 1.00  | 散步 | 从不吸烟 |
| 156.00 | 50.00 | 81.00  | 20.55 | 不锻炼   |       |       |    | 从不吸烟 |
| 156.00 | 59.00 | 87.00  | 24.24 | 每天    | 60.00 | 10.00 | 散步 | 从不吸烟 |
| 150.00 | 48.00 | 82.00  | 21.33 | 每天    | 60.00 | 10.00 | 散步 | 从不吸烟 |
| 156.00 | 52.00 | 80.00  | 21.37 | 每天    | 60.00 | 6.00  | 散步 | 从不吸烟 |
| 161.00 | 67.45 | 93.00  | 26.02 | 每天    | 30.00 | 7.00  | 散步 | 从不吸烟 |
| 150.00 | 43.00 | 70.00  | 19.11 | 不锻炼   |       |       |    | 从不吸烟 |
| 142.00 | 55.20 | 99.00  | 27.38 | 不锻炼   |       |       |    | 从不吸烟 |
| 149.00 | 57.00 | 85.00  | 25.67 | 每天    | 60.00 | 6.00  | 散步 | 从不吸烟 |
| 157.00 | 59.00 | 88.00  | 23.94 | 每天    | 30.00 | 2.00  | 散步 | 从不吸烟 |
| 152.00 | 51.00 | 80.00  | 22.07 | 每天    | 60.00 | 3.00  | 散步 | 从不吸烟 |
| 148.00 | 65.00 | 90.00  | 29.67 | 每天    | 30.00 | 24.00 | 散步 | 从不吸烟 |
| 136.00 | 37.00 | 78.00  | 20.00 | 不锻炼   |       |       |    | 从不吸烟 |
| 148.00 | 44.50 | 70.00  | 20.32 | 每天    | 60.00 | 3.00  | 散步 | 从不吸烟 |
| 134.00 | 46.00 | 82.00  | 25.62 | 每天    | 30.00 | 2.00  | 散步 | 从不吸烟 |
| 148.00 | 52.50 | 89.00  | 23.97 | 每天    | 60.00 | 2.00  | 跳舞 | 从不吸烟 |
| 159.00 | 57.00 | 83.00  | 22.55 | 每周一次↓ | 60.00 | 10.00 | 跳舞 | 从不吸烟 |
| 146.00 | 46.00 | 75.00  | 21.58 | 每天    | 45.00 | 12.00 | 散步 | 从不吸烟 |
| 155.00 | 38.00 | 65.00  | 15.82 | 每天    | 60.00 | 2.00  | 散步 | 从不吸烟 |
| 154.00 | 68.00 | 93.00  | 28.67 | 每天    | 30.00 | 5.00  | 散步 | 从不吸烟 |
| 148.00 | 42.00 | 77.00  | 19.17 | 每天    | 60.00 | 2.00  | 跳舞 | 从不吸烟 |
| 151.00 | 57.50 | 88.00  | 25.22 | 每天    | 30.00 | 2.00  | 散步 | 从不吸烟 |
| 151.00 | 53.00 | 84.00  | 23.24 | 每天    | 60.00 | 14.00 | 散步 | 从不吸烟 |
| 136.50 | 50.00 | 98.00  | 26.84 | 每天    | 30.00 | 10.00 | 散步 | 从不吸烟 |
| 161.00 | 72.00 | 101.00 | 27.78 | 每天    | 60.00 | 3.00  | 散步 | 从不吸烟 |
| 145.00 | 48.50 | 89.00  | 23.07 | 每天    | 30.00 | 3.00  | 散步 | 从不吸烟 |
| 155.00 | 56.50 | 82.00  | 23.52 | 每天    | 60.00 | 7.00  | 散步 | 从不吸烟 |
| 153.00 | 50.00 | 76.00  | 21.36 | 每天    | 60.00 | 1.00  | 散步 | 从不吸烟 |
| 155.50 | 59.00 | 85.00  | 24.40 | 每天    | 60.00 | 3.00  | 散步 | 从不吸烟 |
| 153.00 | 62.30 | 92.00  | 26.61 | 每天    | 30.00 | 5.00  | 散步 | 从不吸烟 |
| 153.00 | 70.00 | 102.00 | 29.90 | 每天    | 60.00 | 20.00 | 散步 | 从不吸烟 |
| 161.00 | 56.00 | 84.00  | 21.60 | 每天    | 60.00 | 1.00  | 散步 | 从不吸烟 |
| 146.00 | 52.00 | 84.00  | 24.39 | 每天    | 60.00 | 7.00  | 散步 | 从不吸烟 |
| 145.00 | 43.00 | 78.00  | 20.45 | 不锻炼   |       |       |    | 从不吸烟 |
| 144.00 | 58.00 | 88.00  | 27.97 | 每天    | 60.00 | 3.00  | 散步 | 从不吸烟 |
| 143.00 | 58.50 | 87.50  | 28.61 | 每天    | 60.00 | 6.00  | 散步 | 从不吸烟 |
| 145.00 | 53.00 | 85.00  | 25.21 | 每周一次↓ | 20.00 | 4.00  | 散步 | 从不吸烟 |
| 146.00 | 57.00 | 90.00  | 26.74 | 每天    | 30.00 | 1.00  | 散步 | 从不吸烟 |
| 144.00 | 39.00 | 76.00  | 18.81 | 不锻炼   |       |       |    | 从不吸烟 |
| 146.00 | 47.00 | 79.00  | 22.05 | 每天    | 60.00 | 9.00  | 散步 | 从不吸烟 |
| 151.00 | 45.00 | 76.00  | 19.74 | 每天    | 60.00 | 4.00  | 散步 | 从不吸烟 |
| 149.00 | 52.00 | 82.00  | 23.42 | 不锻炼   |       |       |    | 从不吸烟 |
| 149.00 | 47.00 | 74.00  | 21.17 | 每天    | 60.00 | 4.00  | 散步 | 从不吸烟 |
| 150.00 | 70.00 | 110.00 | 31.11 | 不锻炼   |       |       |    | 从不吸烟 |
| 152.00 | 69.00 | 110.00 | 29.86 | 每天    | 60.00 | 20.00 | 散步 | 从不吸烟 |
| 143.00 | 55.00 | 98.00  | 26.90 | 每周一次↓ | 30.00 | 3.00  | 散步 | 从不吸烟 |
| 151.00 | 58.00 | 90.00  | 25.44 | 每天    | 60.00 | 2.00  | 散步 | 从不吸烟 |
| 150.00 | 62.00 | 90.00  | 27.56 | 每天    | 30.00 | 11.00 | 散步 | 从不吸烟 |
| 151.00 | 74.00 | 101.00 | 32.45 | 不锻炼   |       |       |    | 从不吸烟 |
| 152.00 | 65.00 | 95.00  | 28.13 | 不锻炼   |       |       |    | 从不吸烟 |
| 149.00 | 69.00 | 94.00  | 31.08 | 每天    | 30.00 | 3.00  | 散步 | 从不吸烟 |

|        |       |        |       |       |       |       |      |      |
|--------|-------|--------|-------|-------|-------|-------|------|------|
| 148.00 | 65.00 | 92.00  | 29.67 | 每天    | 40.00 | 1.00  | 散步   | 从不吸烟 |
| 158.00 | 64.00 | 94.00  | 25.64 | 每天    | 60.00 | 5.00  | 打太极  | 从不吸烟 |
| 154.00 | 60.50 | 90.00  | 25.51 | 每天    | 60.00 | 3.00  | 散步   | 从不吸烟 |
| 158.00 | 56.00 | 86.00  | 22.43 | 每天    | 60.00 | 7.00  | 散步   | 从不吸烟 |
| 153.00 | 54.00 | 70.00  | 23.07 | 每天    | 30.00 | 5.00  | 散步   | 从不吸烟 |
| 140.00 | 43.00 | 72.00  | 21.94 | 不锻炼   |       |       |      | 从不吸烟 |
| 158.00 | 55.00 | 80.00  | 22.03 | 不锻炼   |       |       |      | 从不吸烟 |
| 158.50 | 65.00 | 92.00  | 25.87 | 不锻炼   |       |       |      | 从不吸烟 |
| 163.00 | 61.00 | 84.00  | 22.96 | 每天    | 30.00 | 6.00  | 散步   | 从不吸烟 |
| 149.00 | 60.00 | 89.00  | 27.03 | 每天    | 60.00 | 8.00  | 散步   | 从不吸烟 |
| 148.00 | 54.00 | 84.00  | 24.65 | 每周一次! | 40.00 | 5.00  | 散步   | 从不吸烟 |
| 155.00 | 60.00 | 95.00  | 24.97 | 每天    | 30.00 | 3.00  | 打太极、 | 从不吸烟 |
| 147.00 | 59.00 | 91.00  | 27.30 | 每天    | 60.00 | 13.00 | 跳舞   | 从不吸烟 |
| 152.00 | 58.00 | 90.00  | 25.10 | 不锻炼   |       |       |      | 从不吸烟 |
| 152.00 | 62.00 | 98.00  | 26.84 | 每天    | 30.00 | 1.00  | 做操   | 从不吸烟 |
| 146.00 | 62.00 | 89.00  | 29.09 | 不锻炼   |       |       |      | 从不吸烟 |
| 148.00 | 52.00 | 84.00  | 23.74 | 不锻炼   |       |       |      | 从不吸烟 |
| 148.00 | 42.80 | 71.00  | 19.54 | 每天    | 60.00 | 7.00  | 散步   | 从不吸烟 |
| 153.00 | 76.00 | 100.00 | 32.47 | 每天    | 60.00 | 1.00  | 散步   | 从不吸烟 |
| 147.00 | 50.50 | 87.00  | 23.37 | 每天    | 30.00 | 11.00 | 散步   | 从不吸烟 |
| 153.00 | 64.50 | 92.00  | 27.55 | 不锻炼   |       |       |      | 从不吸烟 |
| 154.00 | 68.00 | 94.00  | 28.67 | 每天    | 30.00 | 3.00  | 散步   | 从不吸烟 |
| 155.00 | 60.00 | 95.00  | 24.97 | 每天    | 30.00 | 1.00  | 散步   | 从不吸烟 |
| 151.50 | 64.00 | 94.00  | 27.88 | 不锻炼   |       |       |      | 从不吸烟 |
| 149.00 | 56.00 | 84.00  | 25.22 | 每天    | 30.00 | 3.00  | 散步   | 吸烟   |
| 150.00 | 53.00 | 83.00  | 23.56 | 不锻炼   |       |       |      | 从不吸烟 |
| 151.00 | 40.00 | 69.00  | 17.54 | 不锻炼   |       |       |      | 从不吸烟 |
| 146.00 | 71.00 | 106.00 | 33.31 | 不锻炼   |       |       |      | 从不吸烟 |
| 146.00 | 44.00 | 78.00  | 20.64 | 每天    | 30.00 | 1.00  | 散步   | 从不吸烟 |
| 150.00 | 54.00 | 89.00  | 24.00 | 每天    | 60.00 | 4.00  | 散步   | 从不吸烟 |
| 150.00 | 59.00 | 91.00  | 26.22 | 每天    | 30.00 | 1.00  | 做操   | 从不吸烟 |
| 160.00 | 55.00 | 80.00  | 21.48 | 不锻炼   |       |       |      | 从不吸烟 |
| 148.00 | 52.00 | 84.00  | 23.74 | 每天    | 30.00 | 4.00  | 散步   | 从不吸烟 |
| 142.00 | 40.00 | 69.00  | 19.84 | 不锻炼   |       |       |      | 从不吸烟 |
| 146.00 | 60.00 | 85.00  | 28.15 | 每天    | 30.00 | 1.00  | 跑步   | 从不吸烟 |
| 150.00 | 57.00 | 84.00  | 25.33 | 不锻炼   |       |       |      | 从不吸烟 |
| 148.00 | 54.50 | 81.00  | 24.88 | 每天    | 30.00 | 3.00  | 散步   | 从不吸烟 |
| 157.00 | 61.00 | 90.00  | 24.75 | 每天    | 60.00 | 3.00  | 散步   | 从不吸烟 |
| 139.00 | 41.00 | 77.00  | 21.22 | 每天    | 30.00 | 4.00  | 散步   | 从不吸烟 |
| 147.00 | 60.00 | 98.00  | 27.77 | 不锻炼   |       |       |      | 从不吸烟 |
| 147.00 | 49.00 | 74.00  | 22.68 | 每天    | 60.00 | 3.00  | 散步   | 从不吸烟 |
| 158.00 | 64.00 | 95.00  | 25.64 | 每周一次! | 10.00 | 4.00  | 散步   | 从不吸烟 |
| 152.00 | 44.00 | 90.00  | 19.04 | 不锻炼   |       |       |      | 从不吸烟 |
| 150.00 | 53.00 | 87.00  | 23.56 | 不锻炼   |       |       |      | 从不吸烟 |
| 143.00 | 37.00 | 65.00  | 18.09 | 不锻炼   |       |       |      | 从不吸烟 |
| 140.00 | 40.00 | 78.00  | 20.41 | 每周一次! | 30.00 | 3.00  | 散步   | 从不吸烟 |
| 155.00 | 74.00 | 107.00 | 30.80 | 不锻炼   |       |       |      | 从不吸烟 |
| 147.00 | 75.00 | 107.00 | 34.71 | 每周一次! | 30.00 | 3.00  | 散步   | 从不吸烟 |
| 143.00 | 60.00 | 94.00  | 29.34 | 不锻炼   |       |       |      | 从不吸烟 |
| 146.00 | 53.00 | 91.00  | 24.86 | 每天    | 30.00 | 4.00  | 散步   | 从不吸烟 |
| 154.00 | 64.00 | 102.00 | 26.99 | 每天    | 90.00 | 14.00 | 散步   | 从不吸烟 |

|        |       |        |       |       |       |       |    |      |
|--------|-------|--------|-------|-------|-------|-------|----|------|
| 160.00 | 53.00 | 74.00  | 20.70 | 不锻炼   |       |       |    | 从不吸烟 |
| 142.00 | 61.50 | 99.00  | 30.50 | 不锻炼   |       |       |    | 从不吸烟 |
| 151.50 | 49.00 | 70.00  | 21.35 | 不锻炼   |       |       |    | 从不吸烟 |
| 152.00 | 68.00 | 94.00  | 29.43 | 每天    | 30.00 | 10.00 | 散步 | 从不吸烟 |
| 144.00 | 70.00 | 92.00  | 33.76 | 不锻炼   |       |       |    | 从不吸烟 |
| 145.50 | 58.15 | 88.00  | 27.47 | 不锻炼   |       |       |    | 从不吸烟 |
| 141.00 | 54.00 | 87.00  | 27.16 | 每天    | 60.00 | 6.00  | 散步 | 从不吸烟 |
| 147.00 | 60.00 | 90.00  | 27.77 | 每天    | 30.00 | 10.00 | 散步 | 从不吸烟 |
| 148.00 | 37.20 | 67.50  | 16.98 | 不锻炼   |       |       |    | 从不吸烟 |
| 146.00 | 50.00 | 87.00  | 23.46 | 不锻炼   |       |       |    | 从不吸烟 |
| 152.00 | 56.00 | 84.00  | 24.24 | 每天    | 60.00 | 11.00 | 散步 | 从不吸烟 |
| 158.00 | 61.00 | 97.00  | 24.44 | 不锻炼   |       |       |    | 从不吸烟 |
| 154.00 | 54.00 | 82.00  | 22.77 | 每天    | 60.00 | 7.00  | 散步 | 从不吸烟 |
| 146.00 | 56.00 | 93.00  | 26.27 | 不锻炼   |       |       |    | 从不吸烟 |
| 146.00 | 48.00 | 78.00  | 22.52 | 每天    | 30.00 | 2.00  | 体操 | 从不吸烟 |
| 158.50 | 57.60 | 81.00  | 22.93 | 每天    | 30.00 | 5.00  | 散步 | 从不吸烟 |
| 143.00 | 53.90 | 98.00  | 26.36 | 每天    | 30.00 | 1.00  | 散步 | 从不吸烟 |
| 153.00 | 59.00 | 92.00  | 25.20 | 不锻炼   |       |       |    | 从不吸烟 |
| 149.00 | 71.00 | 102.00 | 31.98 | 每天    | 30.00 | 2.00  | 散步 | 从不吸烟 |
| 145.00 | 55.00 | 84.00  | 26.16 | 每天    | 30.00 | 5.00  | 散步 | 从不吸烟 |
| 147.00 | 52.50 | 87.00  | 24.30 | 每天    | 60.00 | 3.00  | 跳舞 | 从不吸烟 |
| 150.00 | 58.00 | 85.00  | 25.78 | 每天    | 60.00 | 9.00  | 散步 | 从不吸烟 |
| 148.00 | 62.00 | 89.00  | 28.31 | 每天    | 30.00 | 3.00  | 散步 | 从不吸烟 |
| 148.00 | 45.00 | 76.00  | 20.54 | 每天    | 30.00 | 2.00  | 散步 | 从不吸烟 |
| 146.00 | 50.00 | 87.00  | 23.46 | 每天    | 60.00 | 2.00  | 散步 | 从不吸烟 |
| 136.00 | 51.00 | 88.00  | 27.57 | 不锻炼   |       |       |    | 从不吸烟 |
| 152.00 | 50.00 | 80.00  | 21.64 | 不锻炼   |       |       |    | 从不吸烟 |
| 145.00 | 55.00 | 93.00  | 26.16 | 每天    | 30.00 | 1.00  | 散步 | 从不吸烟 |
| 141.00 | 63.00 | 101.00 | 31.69 | 不锻炼   |       |       |    | 从不吸烟 |
| 144.00 | 37.00 | 81.00  | 17.84 | 每周一次↓ | 20.00 | 2.00  | 散步 | 从不吸烟 |
| 148.00 | 59.50 | 89.00  | 27.16 | 不锻炼   |       |       |    | 从不吸烟 |
| 148.00 | 40.00 | 67.00  | 18.26 | 每天    | 30.00 | 3.00  | 散步 | 从不吸烟 |
| 156.00 | 75.00 | 104.00 | 30.82 | 不锻炼   |       |       |    | 从不吸烟 |
| 149.00 | 49.00 | 82.00  | 22.07 | 不锻炼   |       |       |    | 从不吸烟 |
| 155.00 | 57.00 | 82.00  | 23.73 | 每周一次↓ | 15.00 | 6.00  | 散步 | 从不吸烟 |
| 150.00 | 58.00 | 101.00 | 25.78 | 每天    | 30.00 | 3.00  | 散步 | 从不吸烟 |
| 158.00 | 55.50 | 85.00  | 22.23 | 每天    | 60.00 | 3.00  | 散步 | 从不吸烟 |
| 145.00 | 67.00 | 95.00  | 31.87 | 每天    | 30.00 | 3.00  | 散步 | 从不吸烟 |
| 148.00 | 61.00 | 94.00  | 27.85 | 每天    | 60.00 | 1.00  | 散步 | 从不吸烟 |
| 144.00 | 68.00 | 101.00 | 32.79 | 不锻炼   |       |       |    | 从不吸烟 |
| 158.00 | 69.00 | 94.00  | 27.64 | 不锻炼   |       |       |    | 从不吸烟 |
| 143.00 | 49.00 | 88.00  | 23.96 | 每天    | 30.00 | 7.00  | 散步 | 从不吸烟 |
| 151.00 | 52.00 | 88.00  | 22.81 | 每天    | 60.00 | 17.00 | 散步 | 从不吸烟 |
| 146.50 | 39.50 | 72.00  | 18.40 | 不锻炼   |       |       |    | 从不吸烟 |
| 154.00 | 65.50 | 86.00  | 27.62 | 每周一次↓ | 30.00 | 3.00  | 散步 | 从不吸烟 |
| 157.00 | 80.00 | 105.00 | 32.46 | 每天    | 30.00 | 2.00  | 散步 | 从不吸烟 |
| 150.00 | 36.00 | 63.00  | 16.00 | 不锻炼   |       |       |    | 从不吸烟 |
| 146.00 | 60.00 | 89.00  | 28.15 | 每天    | 60.00 | 10.00 | 散步 | 从不吸烟 |
| 153.00 | 58.00 | 85.00  | 24.78 | 每天    | 30.00 | 1.00  | 散步 | 从不吸烟 |
| 146.00 | 50.00 | 77.00  | 23.46 | 不锻炼   |       |       |    | 从不吸烟 |
| 154.00 | 65.00 | 90.00  | 27.41 | 每天    | 40.00 | 2.00  | 散步 | 从不吸烟 |

|        |       |        |       |       |       |       |    |      |
|--------|-------|--------|-------|-------|-------|-------|----|------|
| 150.00 | 54.00 | 84.00  | 24.00 | 每天    | 60.00 | 1.00  | 散步 | 从不吸烟 |
| 154.00 | 45.00 | 78.00  | 18.97 | 每周一次! | 30.00 | 3.00  | 散步 | 从不吸烟 |
| 139.00 | 49.00 | 86.00  | 25.36 | 每天    | 60.00 | 5.00  | 散步 | 从不吸烟 |
| 143.00 | 55.00 | 83.00  | 26.90 | 每天    | 60.00 | 15.00 | 散步 | 从不吸烟 |
| 148.00 | 61.00 | 96.00  | 27.85 | 不锻炼   |       |       |    | 从不吸烟 |
| 164.00 | 70.00 | 90.00  | 26.03 | 每天    | 30.00 | 9.00  | 散步 | 从不吸烟 |
| 156.00 | 73.00 | 93.00  | 30.00 | 不锻炼   |       |       |    | 从不吸烟 |
| 146.00 | 56.00 | 98.00  | 26.27 | 不锻炼   |       |       |    | 从不吸烟 |
| 147.00 | 59.00 | 85.00  | 27.30 | 每天    | 30.00 | 1.00  | 散步 | 从不吸烟 |
| 146.50 | 52.90 | 87.00  | 24.65 | 每天    | 60.00 | 3.00  | 散步 | 从不吸烟 |
| 152.00 | 43.00 | 63.00  | 18.61 | 不锻炼   |       |       |    | 从不吸烟 |
| 162.00 | 67.00 | 87.00  | 25.53 | 每天    | 30.00 | 3.00  | 散步 | 从不吸烟 |
| 142.00 | 64.00 | 91.00  | 31.74 | 每天    | 30.00 | 7.00  | 散步 | 从不吸烟 |
| 140.00 | 41.50 | 72.00  | 21.17 | 不锻炼   |       |       |    | 从不吸烟 |
| 150.00 | 41.20 | 75.00  | 18.31 | 不锻炼   |       |       |    | 从不吸烟 |
| 142.00 | 49.00 | 78.00  | 24.30 | 不锻炼   |       |       |    | 从不吸烟 |
| 153.00 | 60.00 | 87.00  | 25.63 | 每天    | 60.00 | 5.00  | 跳舞 | 从不吸烟 |
| 149.00 | 51.00 | 83.00  | 22.97 | 不锻炼   |       |       |    | 从不吸烟 |
| 148.00 | 60.00 | 82.00  | 27.39 | 不锻炼   |       |       |    | 从不吸烟 |
| 154.00 | 62.00 | 92.00  | 26.14 | 每天    | 30.00 | 4.00  | 散步 | 从不吸烟 |
| 146.00 | 79.50 | 105.00 | 37.30 | 不锻炼   |       |       |    | 从不吸烟 |
| 157.00 | 62.00 | 88.00  | 25.15 | 不锻炼   |       |       |    | 从不吸烟 |
| 150.00 | 69.50 | 100.00 | 30.89 | 每天    | 30.00 | 5.00  | 散步 | 从不吸烟 |
| 158.00 | 52.00 | 81.00  | 20.83 | 不锻炼   |       |       |    | 从不吸烟 |
| 157.00 | 60.00 | 89.00  | 24.34 | 每天    | 30.00 | 10.00 | 散步 | 从不吸烟 |
| 158.50 | 57.70 | 85.00  | 22.97 | 每天    | 60.00 | 5.00  | 散步 | 从不吸烟 |
| 156.00 | 76.20 | 96.50  | 31.31 | 不锻炼   |       |       |    | 从不吸烟 |
| 156.00 | 73.00 | 93.00  | 30.00 | 每周一次! | 30.00 | 2.00  | 散步 | 从不吸烟 |
| 160.00 | 59.00 | 87.00  | 23.05 | 不锻炼   |       |       |    | 从不吸烟 |
| 162.00 | 74.00 | 92.00  | 28.20 | 每天    | 60.00 | 1.00  | 散步 | 从不吸烟 |
| 144.00 | 50.00 | 90.00  | 24.11 | 每天    | 30.00 | 3.00  | 散步 | 从不吸烟 |
| 141.00 | 51.00 | 82.00  | 25.65 | 每天    | 40.00 | 4.00  | 散步 | 从不吸烟 |
| 157.00 | 78.00 | 102.00 | 31.64 | 每天    | 30.00 | 2.00  | 散步 | 从不吸烟 |
| 146.00 | 67.00 | 92.00  | 31.43 | 每天    | 30.00 | 3.00  | 散步 | 从不吸烟 |
| 151.00 | 52.00 | 84.00  | 22.81 | 每天    | 60.00 | 10.00 | 散步 | 从不吸烟 |
| 150.00 | 85.00 | 115.00 | 37.78 | 每天    | 30.00 | 10.00 | 散步 | 从不吸烟 |
| 147.00 | 50.00 | 91.00  | 23.14 | 每周一次! | 60.00 | 3.00  | 散步 | 从不吸烟 |
| 147.00 | 61.00 | 87.00  | 28.23 | 每天    | 30.00 | 5.00  | 散步 | 从不吸烟 |
| 154.00 | 85.00 | 110.00 | 35.84 | 每天    | 60.00 | 11.00 | 散步 | 从不吸烟 |
| 148.00 | 55.10 | 96.00  | 25.16 | 每天    | 30.00 | 3.00  | 散步 | 从不吸烟 |
| 135.00 | 38.00 | 72.00  | 20.85 | 不锻炼   |       |       |    | 从不吸烟 |
| 164.00 | 63.00 | 90.00  | 23.42 | 每天    | 60.00 | 10.00 | 散步 | 从不吸烟 |
| 162.00 | 63.50 | 87.00  | 24.20 | 每天    | 30.00 | 5.00  | 散步 | 从不吸烟 |
| 149.00 | 73.00 | 94.00  | 32.88 | 不锻炼   |       |       |    | 从不吸烟 |
| 144.00 | 53.00 | 78.00  | 25.56 | 每天    | 30.00 | 10.00 | 散步 | 从不吸烟 |
| 148.00 | 62.40 | 97.00  | 28.49 | 每天    | 30.00 | 2.00  | 散步 | 从不吸烟 |
| 153.00 | 57.00 | 80.00  | 24.35 | 每天    | 30.00 | 10.00 | 散步 | 从不吸烟 |
| 150.00 | 58.00 | 88.00  | 25.78 | 每周一次! | 30.00 | 3.00  | 散步 | 从不吸烟 |
| 153.00 | 66.00 | 98.00  | 28.19 | 每周一次! | 60.00 | 1.00  | 散步 | 从不吸烟 |
| 152.00 | 63.00 | 92.00  | 27.27 | 不锻炼   |       |       |    | 从不吸烟 |
| 152.00 | 60.00 | 85.00  | 25.97 | 不锻炼   |       |       |    | 从不吸烟 |

|        |       |        |       |       |       |       |      |      |
|--------|-------|--------|-------|-------|-------|-------|------|------|
| 153.00 | 82.00 | 102.00 | 35.03 | 每天    | 30.00 | 10.00 | 散步   | 从不吸烟 |
| 148.50 | 61.50 | 92.00  | 27.89 | 每天    | 60.00 | 2.00  | 散步   | 从不吸烟 |
| 152.00 | 53.00 | 90.00  | 22.94 | 不锻炼   |       |       |      | 从不吸烟 |
| 149.00 | 52.80 | 86.00  | 23.78 | 每天    | 30.00 | 2.00  | 散步   | 从不吸烟 |
| 156.50 | 61.00 | 88.00  | 24.91 | 不锻炼   |       |       |      | 从不吸烟 |
| 149.00 | 57.00 | 85.00  | 25.67 | 每天    | 30.00 | 3.00  | 散步   | 从不吸烟 |
| 156.00 | 57.00 | 89.00  | 23.42 | 每天    | 30.00 | 3.00  | 散步   | 从不吸烟 |
| 140.00 | 50.00 | 86.00  | 25.51 | 不锻炼   |       |       |      | 从不吸烟 |
| 148.00 | 58.00 | 91.00  | 26.48 | 每天    | 30.00 | 3.00  | 散步   | 从不吸烟 |
| 158.00 | 63.00 | 89.00  | 25.24 | 每天    | 30.00 | 2.00  | 散步   | 从不吸烟 |
| 145.00 | 40.00 | 71.00  | 19.02 | 每天    | 60.00 | 2.00  | 散步   | 从不吸烟 |
| 152.00 | 65.00 | 85.00  | 28.13 | 不锻炼   |       |       |      | 从不吸烟 |
| 158.00 | 73.00 | 106.00 | 29.24 | 每天    | 60.00 | 3.00  | 跳舞   | 从不吸烟 |
| 150.00 | 50.50 | 79.00  | 22.44 | 每天    | 30.00 | 11.00 | 散步   | 从不吸烟 |
| 144.00 | 52.00 | 90.00  | 25.08 | 每周一次! | 10.00 | 2.00  | 原地活动 | 从不吸烟 |
| 141.00 | 47.30 | 90.00  | 23.79 | 不锻炼   |       |       |      | 从不吸烟 |
| 158.00 | 60.00 | 96.00  | 24.03 | 不锻炼   |       |       |      | 从不吸烟 |
| 145.50 | 47.80 | 87.00  | 22.58 | 不锻炼   |       |       |      | 从不吸烟 |
| 126.00 | 42.00 | 89.00  | 26.46 | 不锻炼   |       |       |      | 从不吸烟 |
| 159.00 | 65.00 | 96.00  | 25.71 | 每周一次! | 30.00 | 4.00  | 散步   | 从不吸烟 |
| 149.00 | 68.00 | 91.00  | 30.63 | 每天    | 30.00 | 5.00  | 散步   | 从不吸烟 |
| 150.50 | 40.35 | 58.00  | 17.81 | 不锻炼   |       |       |      | 从不吸烟 |
| 156.00 | 64.70 | 84.00  | 26.59 | 每天    | 30.00 | 1.00  | 散步   | 从不吸烟 |
| 157.00 | 52.00 | 76.00  | 21.10 | 每周一次! | 30.00 | 2.00  | 散步   | 从不吸烟 |
| 150.00 | 54.00 | 85.00  | 24.00 | 每天    | 60.00 | 2.00  | 散步   | 从不吸烟 |
| 152.00 | 50.00 | 72.00  | 21.64 | 每天    | 60.00 | 15.00 | 散步   | 从不吸烟 |
| 152.00 | 57.00 | 98.00  | 24.67 | 每天    | 30.00 | 3.00  | 散步   | 从不吸烟 |
| 159.00 | 61.00 | 79.00  | 24.13 | 每天    | 30.00 | 10.00 | 散步   | 从不吸烟 |
| 150.00 | 48.00 | 81.00  | 21.33 | 每天    | 30.00 | 2.00  | 散步   | 从不吸烟 |
| 146.00 | 40.00 | 75.00  | 18.77 | 每天    | 30.00 | 2.00  | 散步   | 从不吸烟 |
| 154.00 | 58.00 | 77.00  | 24.46 | 不锻炼   |       |       |      | 从不吸烟 |
| 150.00 | 58.70 | 86.00  | 26.09 | 每天    | 60.00 | 3.00  | 散步   | 从不吸烟 |
| 145.00 | 49.00 | 88.00  | 23.31 | 每天    | 30.00 | 10.00 | 散步   | 从不吸烟 |
| 152.00 | 50.00 | 86.00  | 21.64 | 每天    | 30.00 | 17.00 | 散步   | 从不吸烟 |
| 134.00 | 32.90 | 66.00  | 18.32 | 每天    | 30.00 | 2.00  | 散步   | 从不吸烟 |
| 151.00 | 69.50 | 99.00  | 30.48 | 每天    | 30.00 | 3.00  | 散步   | 从不吸烟 |
| 147.00 | 42.00 | 84.00  | 19.44 | 每天    | 60.00 | 10.00 | 打太极  | 从不吸烟 |
| 148.00 | 47.00 | 85.00  | 21.46 | 每天    | 30.00 | 2.00  | 散步   | 从不吸烟 |
| 158.00 | 66.00 | 92.00  | 26.44 | 不锻炼   |       |       |      | 从不吸烟 |
| 160.00 | 78.00 | 98.00  | 30.47 | 每天    | 30.00 | 3.00  | 散步   | 从不吸烟 |
| 144.00 | 53.00 | 81.00  | 25.56 | 每天    | 30.00 | 1.00  | 散步   | 从不吸烟 |
| 165.50 | 63.70 | 88.00  | 23.26 | 每天    | 30.00 | 4.00  | 散步   | 从不吸烟 |
| 154.00 | 59.00 | 82.00  | 24.88 | 不锻炼   |       |       |      | 从不吸烟 |
| 148.00 | 52.00 | 88.00  | 23.74 | 每天    | 30.00 | 8.00  | 散步   | 从不吸烟 |
| 143.00 | 62.00 | 96.00  | 30.32 | 不锻炼   |       |       |      | 从不吸烟 |
| 152.00 | 59.00 | 90.00  | 25.54 | 每周一次! | 30.00 | 1.00  | 散步   | 从不吸烟 |
| 149.00 | 51.00 | 75.00  | 22.97 | 不锻炼   |       |       |      | 从不吸烟 |
| 152.00 | 58.00 | 82.00  | 25.10 | 每天    | 30.00 | 2.00  | 散步   | 从不吸烟 |
| 136.00 | 45.00 | 71.00  | 24.33 | 不锻炼   |       |       |      | 从不吸烟 |
| 154.00 | 52.00 | 84.00  | 21.93 | 不锻炼   |       |       |      | 从不吸烟 |
| 145.00 | 40.00 | 60.00  | 19.02 | 不锻炼   |       |       |      | 从不吸烟 |

|        |       |        |       |       |        |       |     |      |
|--------|-------|--------|-------|-------|--------|-------|-----|------|
| 149.00 | 62.00 | 87.00  | 27.93 | 每周一次↓ | 30.00  | 1.00  | 散步  | 从不吸烟 |
| 156.00 | 54.00 | 94.00  | 22.19 | 每周一次↓ | 10.00  | 5.00  | 散步  | 从不吸烟 |
| 155.00 | 51.00 | 81.00  | 21.23 | 不锻炼   |        |       |     | 从不吸烟 |
| 150.00 | 66.00 | 88.00  | 29.33 | 不锻炼   |        |       |     | 从不吸烟 |
| 145.00 | 41.30 | 66.00  | 19.64 | 每天    | 45.00  | 3.00  | 散步  | 从不吸烟 |
| 154.50 | 43.00 | 68.00  | 18.01 | 不锻炼   |        |       |     | 从不吸烟 |
| 155.00 | 61.00 | 84.00  | 25.39 | 每周一次↓ | 30.00  | 1.00  | 散步  | 从不吸烟 |
| 152.00 | 65.20 | 97.00  | 28.22 | 每天    | 60.00  | 12.00 | 散步  | 从不吸烟 |
| 165.00 | 73.00 | 90.00  | 26.81 | 每天    | 60.00  | 10.00 | 散步  | 从不吸烟 |
| 145.00 | 59.50 | 90.00  | 28.30 | 每天    | 40.00  | 1.00  | 散步  | 从不吸烟 |
| 158.00 | 72.00 | 92.00  | 28.84 | 不锻炼   |        |       |     | 从不吸烟 |
| 156.60 | 43.80 | 73.00  | 17.86 | 每天    | 30.00  | 6.00  | 散步  | 从不吸烟 |
| 158.00 | 80.00 | 110.00 | 32.05 | 不锻炼   |        |       |     | 从不吸烟 |
| 150.00 | 52.00 | 86.00  | 23.11 | 不锻炼   |        |       |     | 从不吸烟 |
| 154.00 | 54.00 | 90.00  | 22.77 | 每天    | 60.00  | 2.00  | 散步  | 从不吸烟 |
| 146.00 | 58.00 | 92.00  | 27.21 | 每天    | 30.00  | 9.00  | 散步  | 从不吸烟 |
| 148.00 | 45.60 | 79.00  | 20.82 | 每天    | 120.00 | 8.00  | 散步  | 从不吸烟 |
| 152.00 | 60.00 | 83.00  | 25.97 | 每天    | 30.00  | 6.00  | 散步  | 从不吸烟 |
| 151.50 | 58.00 | 81.00  | 25.27 | 每天    | 30.00  | 1.00  | 散步  | 从不吸烟 |
| 163.00 | 70.70 | 96.00  | 26.61 | 每天    | 30.00  | 3.00  | 散步  | 从不吸烟 |
| 152.50 | 55.00 | 86.00  | 23.65 | 不锻炼   |        |       |     | 从不吸烟 |
| 156.00 | 55.00 | 84.00  | 22.60 | 每天    | 30.00  | 3.00  | 散步  | 从不吸烟 |
| 154.00 | 54.00 | 87.00  | 22.77 | 不锻炼   |        |       |     | 从不吸烟 |
| 147.00 | 51.00 | 90.00  | 23.60 | 每周一次↓ | 30.00  | 4.00  | 散步  | 从不吸烟 |
| 159.50 | 47.20 | 75.00  | 18.55 | 每天    | 60.00  | 2.00  | 散步  | 从不吸烟 |
| 160.50 | 59.30 | 81.00  | 23.02 | 每天    | 60.00  | 5.00  | 散步  | 从不吸烟 |
| 150.00 | 65.50 | 94.00  | 29.11 | 每天    | 60.00  | 10.00 | 散步  | 从不吸烟 |
| 156.00 | 63.00 | 85.00  | 25.89 | 每天    | 30.00  | 3.00  | 散步  | 从不吸烟 |
| 155.00 | 59.50 | 85.00  | 24.77 | 每天    | 30.00  |       | 散步  | 从不吸烟 |
| 145.00 | 47.00 | 77.00  | 22.35 | 每天    | 40.00  | 2.00  | 散步  | 从不吸烟 |
| 145.00 | 40.00 | 76.00  | 19.02 | 不锻炼   |        |       |     | 从不吸烟 |
| 153.00 | 54.85 | 80.00  | 23.43 | 不锻炼   |        |       |     | 从不吸烟 |
| 149.00 | 49.00 | 80.00  | 22.07 | 每天    | 30.00  | 1.00  | 散步  | 从不吸烟 |
| 156.00 | 86.00 | 106.00 | 35.34 | 不锻炼   |        |       |     | 从不吸烟 |
| 152.00 | 60.00 | 85.00  | 25.97 | 每周一次↓ | 30.00  | 2.00  | 散步  | 从不吸烟 |
| 151.00 | 51.00 | 77.00  | 22.37 | 不锻炼   |        |       |     | 从不吸烟 |
| 143.50 | 58.00 | 87.00  | 28.17 | 每天    | 60.00  | 10.00 | 散步  | 从不吸烟 |
| 151.00 | 60.00 | 80.00  | 26.31 | 不锻炼   |        |       |     | 从不吸烟 |
| 156.50 | 53.00 | 93.00  | 21.64 | 不锻炼   |        |       |     | 从不吸烟 |
| 150.00 | 47.00 | 87.00  | 20.89 | 不锻炼   |        |       |     | 从不吸烟 |
| 155.00 | 63.00 | 95.00  | 26.22 | 每天    | 60.00  | 3.00  | 散步  | 从不吸烟 |
| 156.00 | 54.50 | 80.00  | 22.39 | 每周一次↓ | 30.00  | 2.00  | 散步  | 从不吸烟 |
| 148.00 | 52.50 | 91.00  | 23.97 | 不锻炼   |        |       |     | 从不吸烟 |
| 147.00 | 43.00 | 76.00  | 19.90 | 偶尔    | 30.00  | 8.00  | 散步  | 从不吸烟 |
| 159.00 | 58.70 | 85.00  | 23.22 | 每天    | 30.00  | 3.00  | 散步  | 从不吸烟 |
| 145.00 | 41.00 | 78.00  | 19.50 | 不锻炼   |        |       |     | 从不吸烟 |
| 142.00 | 50.00 | 88.00  | 24.80 | 每天    | 60.00  | 10.00 | 散步  | 从不吸烟 |
| 154.00 | 55.00 | 84.00  | 23.19 | 每天    | 60.00  | 2.00  | 散步  | 从不吸烟 |
| 145.00 | 50.00 | 79.00  | 23.78 | 不锻炼   |        |       |     | 从不吸烟 |
| 155.00 | 57.00 | 88.00  | 23.73 | 每天    | 30.00  | 3.00  | 八段锦 | 从不吸烟 |
| 153.00 | 69.00 | 98.00  | 29.48 | 每天    | 60.00  | 20.00 | 散步  | 从不吸烟 |

|        |       |        |       |       |       |       |        |      |
|--------|-------|--------|-------|-------|-------|-------|--------|------|
| 154.50 | 80.50 | 102.00 | 33.72 | 每天    | 30.00 | 1.00  | 散步     | 从不吸烟 |
| 145.00 | 61.10 | 95.00  | 29.06 | 不锻炼   |       |       |        | 从不吸烟 |
| 145.00 | 59.00 | 98.00  | 28.06 | 每天    | 30.00 | 6.00  | 散步     | 从不吸烟 |
| 145.00 | 52.00 | 88.00  | 24.73 | 不锻炼   |       |       |        | 从不吸烟 |
| 155.00 | 60.50 | 90.00  | 25.18 | 每天    | 30.00 | 4.00  | 散步     | 从不吸烟 |
| 143.00 | 44.00 | 85.00  | 21.52 | 每天    | 60.00 | 7.00  | 散步     | 从不吸烟 |
| 133.00 | 35.00 | 73.00  | 19.79 | 不锻炼   |       |       |        | 从不吸烟 |
| 155.00 | 74.00 | 87.00  | 30.80 | 每天    | 30.00 | 10.00 | 散步     | 从不吸烟 |
| 150.00 | 66.00 | 95.00  | 29.33 | 每天    | 30.00 | 2.00  | 散步     | 从不吸烟 |
| 157.00 | 46.50 | 74.00  | 18.86 | 每天    | 30.00 | 1.00  | 散步     | 从不吸烟 |
| 145.00 | 52.50 | 89.00  | 24.97 | 每周一次! | 30.00 | 1.00  | 散步     | 从不吸烟 |
| 152.00 | 55.00 | 85.00  | 23.81 | 每天    | 30.00 | 9.00  | 散步     | 从不吸烟 |
| 153.00 | 40.50 | 65.00  | 17.30 | 每天    | 30.00 | 1.00  | 散步     | 从不吸烟 |
| 157.00 | 51.00 | 75.00  | 20.69 | 不锻炼   |       |       |        | 从不吸烟 |
| 153.00 | 57.00 | 86.00  | 24.35 | 每天    | 30.00 | 3.00  | 散步     | 从不吸烟 |
| 152.50 | 77.00 | 101.00 | 33.11 | 每周一次! | 30.00 | 1.00  | 散步     | 从不吸烟 |
| 150.00 | 59.00 | 91.00  | 26.22 | 每天    | 30.00 | 2.00  | 散步     | 从不吸烟 |
| 145.00 | 59.00 | 89.00  | 28.06 | 每天    | 30.00 | 10.00 | 散步     | 从不吸烟 |
| 150.50 | 50.00 | 75.00  | 22.07 | 每周一次! | 40.00 | 3.00  | 散步     | 从不吸烟 |
| 143.00 | 58.80 | 90.00  | 28.75 | 每天    | 30.00 | 10.00 | 散步     | 从不吸烟 |
| 155.00 | 46.10 | 74.00  | 19.19 | 不锻炼   |       |       |        | 从不吸烟 |
| 151.00 | 71.70 | 94.00  | 31.45 | 每天    | 30.00 | 1.00  | 散步     | 从不吸烟 |
| 157.00 | 80.00 | 110.00 | 32.46 | 不锻炼   |       |       |        | 从不吸烟 |
| 156.00 | 64.00 | 88.00  | 26.30 | 不锻炼   |       |       |        | 从不吸烟 |
| 155.00 | 51.10 | 72.00  | 21.27 | 每天    | 60.00 | 4.00  | 散步     | 从不吸烟 |
| 155.00 | 62.80 | 92.00  | 26.14 | 不锻炼   |       |       |        | 从不吸烟 |
| 140.00 | 40.00 | 74.00  | 20.41 | 每天    | 30.00 | 10.00 | 散步     | 从不吸烟 |
| 144.00 | 58.00 | 97.00  | 27.97 | 每天    | 30.00 | 10.00 | 散步     | 从不吸烟 |
| 142.00 | 44.00 | 70.00  | 21.82 | 每天    | 30.00 | 1.00  | 器械锻炼   | 从不吸烟 |
| 148.00 | 44.10 | 78.00  | 20.13 | 每天    | 30.00 | 2.00  | 散步     | 从不吸烟 |
| 153.50 | 62.00 | 90.00  | 26.31 | 每天    | 60.00 | 10.00 | 散步     | 从不吸烟 |
| 153.00 | 51.50 | 72.00  | 22.00 | 每天    | 30.00 | 5.00  | 散步     | 从不吸烟 |
| 140.00 | 44.00 | 84.00  | 22.45 | 每天    | 60.00 | 7.00  | 散步     | 从不吸烟 |
| 143.00 | 51.50 | 83.00  | 25.18 | 每天    | 30.00 | 6.00  | 散步     | 从不吸烟 |
| 156.00 | 57.50 | 86.00  | 23.63 | 不锻炼   |       |       |        | 从不吸烟 |
| 137.00 | 44.55 | 75.00  | 23.74 | 每天    | 60.00 | 6.00  | 做操, 散步 | 从不吸烟 |
| 152.00 | 49.00 | 86.00  | 21.21 | 不锻炼   |       |       |        | 从不吸烟 |
| 160.00 | 66.60 | 94.00  | 26.02 | 不锻炼   |       |       |        | 从不吸烟 |
| 151.00 | 50.50 | 74.00  | 22.15 | 不锻炼   |       |       |        | 从不吸烟 |
| 149.00 | 70.00 | 93.00  | 31.53 | 每天    | 60.00 | 8.00  | 散步     | 从不吸烟 |
| 156.00 | 43.50 | 69.00  | 17.87 | 每天    | 60.00 | 3.00  | 散步     | 从不吸烟 |
| 153.50 | 62.30 | 92.00  | 26.44 | 不锻炼   |       |       |        | 从不吸烟 |
| 155.00 | 61.00 | 89.00  | 25.39 | 每天    | 30.00 | 1.00  | 散步     | 从不吸烟 |
| 155.00 | 47.50 | 76.00  | 19.77 | 每天    | 30.00 | 2.00  | 散步     | 从不吸烟 |
| 154.00 | 61.00 | 98.00  | 25.72 | 每天    | 60.00 | 6.00  | 散步     | 从不吸烟 |
| 152.00 | 56.00 | 86.00  | 24.24 | 每天    | 30.00 | 7.00  | 散步     | 从不吸烟 |
| 139.50 | 40.50 | 78.00  | 20.81 | 不锻炼   |       |       |        | 从不吸烟 |
| 151.00 | 48.00 | 72.00  | 21.05 | 每天    | 40.00 | 2.00  | 散步     | 从不吸烟 |
| 155.00 | 48.00 | 75.00  | 19.98 | 每天    | 60.00 | 3.00  | 跳舞     | 从不吸烟 |
| 144.00 | 62.70 | 103.00 | 30.24 | 每天    | 60.00 | 7.00  | 散步     | 从不吸烟 |
| 152.00 | 52.00 | 81.00  | 22.51 | 不锻炼   |       |       |        | 从不吸烟 |

|        |       |        |       |       |        |       |    |      |
|--------|-------|--------|-------|-------|--------|-------|----|------|
| 154.00 | 77.50 | 95.00  | 32.68 | 每天    | 60.00  | 7.00  | 散步 | 从不吸烟 |
| 135.50 | 48.00 | 83.00  | 26.14 | 每天    | 30.00  | 1.00  | 散步 | 从不吸烟 |
| 146.00 | 51.50 | 83.00  | 24.16 | 不锻炼   |        |       |    | 从不吸烟 |
| 157.00 | 60.00 | 91.00  | 24.34 | 每周一次↓ | 30.00  | 3.00  | 散步 | 从不吸烟 |
| 150.00 | 45.00 | 74.00  | 20.00 | 每天    | 60.00  | 1.00  | 散步 | 从不吸烟 |
| 151.00 | 59.00 | 89.00  | 25.88 | 每天    | 40.00  | 1.00  | 散步 | 从不吸烟 |
| 160.00 | 59.00 | 78.00  | 23.05 | 每天    | 15.00  | 1.00  | 散步 | 吸烟   |
| 153.00 | 54.00 | 70.00  | 23.07 | 每天    | 60.00  | 5.00  | 散步 | 从不吸烟 |
| 157.00 | 64.00 | 86.00  | 25.96 | 不锻炼   |        |       |    | 从不吸烟 |
| 148.00 | 58.00 | 87.00  | 26.48 | 每天    | 30.00  | 2.00  | 散步 | 从不吸烟 |
| 152.50 | 55.20 | 77.00  | 23.74 | 每天    | 60.00  | 10.00 | 散步 | 从不吸烟 |
| 149.00 | 60.00 | 88.00  | 27.03 | 每天    | 30.00  | 3.00  | 散步 | 从不吸烟 |
| 148.00 | 55.50 | 87.00  | 25.34 | 每天    | 30.00  | 3.00  | 散步 | 从不吸烟 |
| 147.00 | 49.40 | 70.00  | 22.86 | 每天    | 30.00  | 1.00  | 散步 | 从不吸烟 |
| 163.00 | 61.40 | 85.00  | 23.11 | 每天    | 30.00  | 2.00  | 散步 | 从不吸烟 |
| 150.00 | 58.60 | 88.00  | 26.04 | 不锻炼   |        |       |    | 从不吸烟 |
| 152.00 | 56.00 | 90.00  | 24.24 | 每天    | 60.00  | 5.00  | 散步 | 从不吸烟 |
| 148.00 | 52.70 | 86.00  | 24.06 | 每周一次↓ | 30.00  | 2.00  | 散步 | 从不吸烟 |
| 154.00 | 54.00 | 84.00  | 22.77 | 每天    | 30.00  | 7.00  | 散步 | 从不吸烟 |
| 140.00 | 50.00 | 78.00  | 25.51 | 每天    | 30.00  | 1.00  | 散步 | 从不吸烟 |
| 152.00 | 71.00 | 105.00 | 30.73 | 每天    | 30.00  | 3.00  | 散步 | 从不吸烟 |
| 152.00 | 40.80 | 61.00  | 17.66 | 每天    | 30.00  | 4.00  | 散步 | 从不吸烟 |
| 165.00 | 82.00 | 104.00 | 30.12 | 每天    | 60.00  | 10.00 | 散步 | 从不吸烟 |
| 145.00 | 47.00 | 78.00  | 22.35 | 每天    | 60.00  | 4.00  | 散步 | 从不吸烟 |
| 150.00 | 45.90 | 77.00  | 20.40 | 每天    | 30.00  | 2.00  | 散步 | 从不吸烟 |
| 152.00 | 64.00 | 92.00  | 27.70 | 每天    | 30.00  | 2.00  | 散步 | 从不吸烟 |
| 154.00 | 58.00 | 90.00  | 24.46 | 每周一次↓ | 40.00  | 1.00  | 散步 | 从不吸烟 |
| 148.00 | 68.00 | 85.00  | 31.04 | 每天    | 120.00 | 1.00  | 散步 | 从不吸烟 |
| 149.00 | 63.00 | 91.00  | 28.38 | 每周一次↓ | 30.00  | 3.00  | 散步 | 从不吸烟 |
| 148.00 | 60.00 | 86.00  | 27.39 | 每周一次↓ | 30.00  | 1.00  | 散步 | 从不吸烟 |
| 156.00 | 56.00 | 84.00  | 23.01 | 每天    | 30.00  | 10.00 | 散步 | 从不吸烟 |
| 146.00 | 47.00 | 74.00  | 22.05 | 每天    | 30.00  | 8.00  | 散步 | 从不吸烟 |
| 151.00 | 42.00 | 67.00  | 18.42 | 每天    | 10.00  | 10.00 | 散步 | 过去吸, |
| 148.00 | 58.00 | 82.00  | 26.48 | 每天    | 30.00  | 10.00 | 散步 | 从不吸烟 |
| 160.00 | 80.00 | 100.00 | 31.25 | 每天    | 30.00  | 3.00  | 散步 | 从不吸烟 |
| 157.00 | 53.00 | 73.00  | 21.50 | 每天    | 30.00  | 3.00  | 散步 | 从不吸烟 |
| 148.00 | 49.50 | 88.00  | 22.60 | 每天    | 30.00  | 2.00  | 散步 | 从不吸烟 |
| 145.00 | 60.00 | 94.00  | 28.54 | 每周一次↓ | 30.00  | 1.00  | 散步 | 从不吸烟 |
| 144.00 | 40.00 | 63.00  | 19.29 | 每天    | 30.00  | 10.00 | 散步 | 从不吸烟 |
| 150.00 | 59.00 | 91.00  | 26.22 | 每周一次↓ | 30.00  | 1.00  | 散步 | 从不吸烟 |
| 148.00 | 41.00 | 76.00  | 18.72 | 每天    | 30.00  | 1.00  | 散步 | 从不吸烟 |
| 151.00 | 50.00 | 74.00  | 21.93 | 每天    | 30.00  | 2.00  | 散步 | 从不吸烟 |
| 133.00 | 48.00 | 89.00  | 27.14 | 不锻炼   |        |       |    | 从不吸烟 |
| 145.00 | 41.00 | 91.00  | 19.50 | 每周一次↓ | 30.00  | 2.00  | 散步 | 从不吸烟 |
| 148.00 | 67.00 | 99.00  | 30.59 | 每天    | 30.00  | 6.00  | 散步 | 从不吸烟 |
| 157.00 | 84.00 | 106.00 | 34.08 | 不锻炼   |        |       |    | 从不吸烟 |
| 145.00 | 41.00 | 66.00  | 19.50 | 每周一次↓ | 30.00  | 1.00  | 散步 | 从不吸烟 |
| 150.00 | 50.00 | 76.00  | 22.22 | 不锻炼   |        |       |    | 从不吸烟 |
| 142.00 | 54.00 | 84.00  | 26.78 | 每天    | 30.00  | 4.00  | 散步 | 从不吸烟 |
| 157.00 | 72.00 | 103.00 | 29.21 | 每天    | 30.00  | 12.00 | 散步 | 从不吸烟 |
| 148.00 | 51.00 | 75.00  | 23.28 | 每天    | 30.00  | 5.00  | 散步 | 从不吸烟 |

|        |       |        |       |       |       |       |      |      |
|--------|-------|--------|-------|-------|-------|-------|------|------|
| 141.50 | 48.50 | 78.00  | 24.22 | 每周一次↓ | 20.00 | 2.00  | 散步   | 从不吸烟 |
| 163.00 | 61.00 | 86.00  | 22.96 | 每天    | 60.00 | 21.00 | 散步   | 从不吸烟 |
| 151.00 | 64.00 | 85.00  | 28.07 | 每天    | 60.00 | 12.00 | 散步   | 从不吸烟 |
| 148.00 | 40.70 | 67.00  | 18.58 | 每周一次↓ | 30.00 | 5.00  | 散步   | 从不吸烟 |
| 152.00 | 58.00 | 90.00  | 25.10 | 每天    | 30.00 | 5.00  | 散步   | 从不吸烟 |
| 151.00 | 59.10 | 94.00  | 25.92 | 每天    | 30.00 | 6.00  | 散步   | 从不吸烟 |
| 154.00 | 60.50 | 97.00  | 25.51 | 不锻炼   |       |       |      | 从不吸烟 |
| 150.00 | 60.00 | 90.00  | 26.67 | 每周一次↓ | 30.00 | 1.00  | 散步   | 从不吸烟 |
| 151.00 | 63.00 | 101.00 | 27.63 | 每周一次↓ | 30.00 | 1.00  | 散步   | 从不吸烟 |
| 156.00 | 74.00 | 96.00  | 30.41 | 每天    | 60.00 | 1.00  | 散步   | 从不吸烟 |
| 148.00 | 56.00 | 85.00  | 25.57 | 每天    | 30.00 | 2.00  | 散步   | 从不吸烟 |
| 144.50 | 71.50 | 89.00  | 34.24 | 每周一次↓ | 60.00 | 1.00  | 散步   | 从不吸烟 |
| 151.00 | 56.60 | 87.00  | 24.82 | 每天    | 30.00 | 2.00  | 散步   | 从不吸烟 |
| 144.50 | 47.30 | 80.00  | 22.65 | 不锻炼   |       |       |      | 从不吸烟 |
| 157.00 | 60.00 | 88.00  | 24.34 | 每天    | 40.00 | 3.00  | 散步   | 从不吸烟 |
| 148.00 | 70.00 | 94.00  | 31.96 | 每天    | 30.00 | 11.00 | 散步   | 从不吸烟 |
| 157.50 | 57.30 | 83.00  | 23.10 | 每天    | 30.00 | 5.00  | 散步   | 从不吸烟 |
| 152.00 | 62.50 | 94.00  | 27.05 | 不锻炼   |       |       |      | 从不吸烟 |
| 152.00 | 51.00 | 86.00  | 22.07 | 每天    | 60.00 | 7.00  | 散步   | 从不吸烟 |
| 145.00 | 65.00 | 100.00 | 30.92 | 每天    | 30.00 | 10.00 | 散步   | 从不吸烟 |
| 152.50 | 47.40 | 78.00  | 20.38 | 每天    | 60.00 | 6.00  | 散步   | 从不吸烟 |
| 148.00 | 53.00 | 94.00  | 24.20 | 每天    | 10.00 | 1.00  | 散步   | 从不吸烟 |
| 145.00 | 48.00 | 80.00  | 22.83 | 每天    | 30.00 | 4.00  | 散步   | 从不吸烟 |
| 155.00 | 51.00 | 88.00  | 21.23 | 每天    | 20.00 | 1.00  | 散步   | 从不吸烟 |
| 149.00 | 55.00 | 82.00  | 24.77 | 不锻炼   |       |       |      | 从不吸烟 |
| 153.00 | 56.00 | 86.00  | 23.92 | 每天    | 40.00 | 2.00  | 散步   | 从不吸烟 |
| 149.00 | 52.00 | 79.00  | 23.42 | 每周一次↓ | 30.00 | 5.00  | 散步   | 从不吸烟 |
| 152.00 | 50.00 | 84.00  | 21.64 | 每天    | 60.00 | 2.00  | 散步   | 从不吸烟 |
| 149.00 | 59.50 | 89.00  | 26.80 | 不锻炼   |       |       |      | 吸烟   |
| 154.00 | 67.00 | 102.00 | 28.25 | 不锻炼   |       |       |      | 从不吸烟 |
| 155.00 | 80.00 | 99.00  | 33.30 | 每天    | 30.00 | 3.00  | 散步   | 从不吸烟 |
| 138.00 | 59.00 | 97.00  | 30.98 | 每天    | 30.00 | 4.00  | 散步   | 从不吸烟 |
| 157.00 | 77.00 | 98.00  | 31.24 | 每天    | 30.00 | 1.00  | 散步   | 从不吸烟 |
| 155.00 | 60.00 | 90.00  | 24.97 | 每天    | 60.00 | 3.00  | 散步   | 从不吸烟 |
| 143.00 | 54.00 | 83.00  | 26.41 | 不锻炼   |       |       |      | 从不吸烟 |
| 160.00 | 62.00 | 86.00  | 24.22 | 不锻炼   |       |       |      | 从不吸烟 |
| 155.00 | 54.50 | 86.00  | 22.68 | 每天    | 30.00 | 1.00  | 散步   | 从不吸烟 |
| 140.00 | 40.00 | 75.00  | 20.41 | 每天    | 60.00 | 2.00  | 散步   | 从不吸烟 |
| 140.00 | 40.00 | 75.00  | 20.41 | 每天    | 60.00 | 2.00  | 散步   | 从不吸烟 |
| 142.00 | 37.80 | 82.00  | 18.75 | 不锻炼   |       |       |      | 从不吸烟 |
| 146.00 | 57.90 | 91.00  | 27.16 | 不锻炼   |       |       |      | 从不吸烟 |
| 145.00 | 36.00 | 69.00  | 17.12 | 不锻炼   |       |       |      | 从不吸烟 |
| 150.00 | 28.00 | 48.00  | 12.44 | 不锻炼   |       |       |      | 从不吸烟 |
| 147.00 | 56.00 | 87.00  | 25.92 | 每天    | 60.00 | 7.00  | 散步   | 从不吸烟 |
| 136.00 | 43.00 | 86.00  | 23.25 | 不锻炼   |       |       |      | 从不吸烟 |
| 159.00 | 66.00 | 91.00  | 26.11 | 每天    | 40.00 | 2.00  | 散步   | 从不吸烟 |
| 141.00 | 45.00 | 85.00  | 22.63 | 每天    | 60.00 | 11.00 | 散步   | 从不吸烟 |
| 155.00 | 57.00 | 83.00  | 23.73 | 每天    | 60.00 | 10.00 | 散步   | 从不吸烟 |
| 157.00 | 51.10 | 84.00  | 20.73 | 每天    | 30.00 | 12.00 | 骑自行车 | 从不吸烟 |
| 150.00 | 59.50 | 90.00  | 26.44 | 每天    | 30.00 | 5.00  | 散步   | 从不吸烟 |
| 159.00 | 55.00 | 84.00  | 21.76 | 每天    | 30.00 | 1.00  | 散步   | 从不吸烟 |

|        |       |        |       |       |       |       |     |        |
|--------|-------|--------|-------|-------|-------|-------|-----|--------|
| 149.00 | 59.00 | 86.00  | 26.58 | 不锻炼   |       |       |     | 从不吸烟   |
| 142.50 | 53.00 | 87.00  | 26.10 | 每天    | 30.00 | 6.00  | 散步  | 从不吸烟   |
| 142.00 | 70.00 | 102.00 | 34.72 | 每天    | 30.00 | 5.00  | 散步  | 从不吸烟   |
| 151.00 | 44.00 | 69.00  | 19.30 | 每天    | 30.00 | 1.00  | 散步  | 从不吸烟   |
| 149.50 | 55.00 | 80.00  | 24.61 | 每天    | 30.00 | 1.00  | 散步  | 从不吸烟   |
| 152.00 | 49.00 | 84.00  | 21.21 | 每天    | 30.00 | 1.00  | 散步  | 从不吸烟   |
| 151.00 | 61.00 | 84.00  | 26.75 | 每天    | 60.00 | 10.00 | 散步  | 从不吸烟   |
| 163.00 | 41.00 | 67.00  | 15.43 | 每天    | 30.00 | 10.00 | 散步  | 从不吸烟   |
| 141.00 | 47.50 | 68.00  | 23.89 | 每天    | 60.00 | 3.00  | 散步  | 从不吸烟   |
| 143.00 | 73.10 | 114.00 | 35.75 | 不锻炼   |       |       |     | 从不吸烟   |
| 145.00 | 56.50 | 85.00  | 26.87 | 每天    | 60.00 | 10.00 | 散步  | 从不吸烟   |
| 143.00 | 42.00 | 72.00  | 20.54 | 不锻炼   |       |       |     | 从不吸烟   |
| 157.00 | 63.00 | 89.00  | 25.56 | 每天    | 90.00 | 11.00 | 散步  | 过去吸, i |
| 150.00 | 52.00 | 76.00  | 23.11 | 不锻炼   |       |       |     | 从不吸烟   |
| 144.00 | 56.00 | 86.00  | 27.01 | 每天    | 30.00 | 1.00  | 散步  | 从不吸烟   |
| 152.00 | 59.50 | 84.00  | 25.75 | 每天    | 60.00 | 5.00  | 散步  | 从不吸烟   |
| 148.00 | 49.50 | 71.00  | 22.60 | 每天    | 30.00 | 5.00  | 散步  | 从不吸烟   |
| 150.00 | 41.00 | 74.00  | 18.22 | 每天    | 60.00 | 7.00  | 散步  | 从不吸烟   |
| 157.00 | 54.00 | 89.00  | 21.91 | 每天    | 30.00 | 2.00  | 散步  | 从不吸烟   |
| 159.00 | 58.00 | 83.00  | 22.94 | 每天    | 60.00 | 9.00  | 打球  | 从不吸烟   |
| 166.50 | 59.90 | 81.00  | 21.61 | 每天    | 30.00 | 3.00  | 散步  | 从不吸烟   |
| 158.00 | 55.50 | 76.00  | 22.23 | 每天    | 60.00 | 6.00  | 散步  | 从不吸烟   |
| 147.00 | 55.00 | 89.00  | 25.45 | 不锻炼   |       |       |     | 从不吸烟   |
| 152.00 | 81.00 | 109.00 | 35.06 | 每天    | 30.00 | 2.00  | 散步  | 从不吸烟   |
| 155.00 | 38.00 | 70.00  | 15.82 | 不锻炼   |       |       |     | 从不吸烟   |
| 154.00 | 49.00 | 79.00  | 20.66 | 不锻炼   |       |       |     | 从不吸烟   |
| 158.00 | 58.00 | 86.00  | 23.23 | 每天    | 30.00 | 3.00  | 散步  | 从不吸烟   |
| 148.00 | 44.00 | 72.00  | 20.09 | 不锻炼   |       |       |     | 从不吸烟   |
| 154.00 | 48.50 | 84.00  | 20.45 | 每天    | 30.00 | 8.00  | 散步  | 从不吸烟   |
| 158.00 | 58.00 | 80.00  | 23.23 | 不锻炼   |       |       |     | 从不吸烟   |
| 144.00 | 38.00 | 62.00  | 18.33 | 不锻炼   |       |       |     | 从不吸烟   |
| 135.00 | 56.50 | 85.00  | 31.00 | 每天    | 60.00 | 2.00  | 保健操 | 从不吸烟   |
| 153.00 | 60.00 | 95.00  | 25.63 | 每天    | 30.00 | 7.00  | 散步  | 从不吸烟   |
| 154.00 | 59.00 | 85.00  | 24.88 | 每周一次! | 30.00 | 3.00  | 散步  | 从不吸烟   |
| 142.00 | 49.50 | 83.00  | 24.55 | 每天    | 60.00 | 7.00  | 散步  | 从不吸烟   |
| 154.00 | 46.00 | 78.00  | 19.40 | 不锻炼   |       |       |     | 从不吸烟   |
| 149.00 | 54.00 | 87.00  | 24.32 | 每天    | 30.00 | 5.00  | 散步  | 从不吸烟   |
| 161.00 | 62.00 | 86.00  | 23.92 | 每天    | 60.00 | 1.00  | 散步  | 从不吸烟   |
| 154.00 | 63.00 | 85.00  | 26.56 | 每周一次! | 30.00 | 1.00  | 散步  | 从不吸烟   |
| 159.00 | 51.00 | 75.00  | 20.17 | 每天    | 30.00 | 9.00  | 散步  | 从不吸烟   |
| 145.00 | 62.30 | 100.00 | 29.63 | 每天    | 30.00 | 11.00 | 散步  | 从不吸烟   |
| 165.00 | 69.00 | 93.00  | 25.34 | 每天    | 60.00 | 5.00  | 散步  | 从不吸烟   |
| 150.00 | 58.50 | 90.00  | 26.00 | 不锻炼   |       |       |     | 从不吸烟   |
| 153.00 | 55.00 | 86.00  | 23.50 | 每天    | 30.00 | 10.00 | 散步  | 从不吸烟   |
| 148.00 | 57.00 | 85.00  | 26.02 | 每天    | 30.00 | 3.00  | 散步  | 从不吸烟   |
| 141.00 | 38.00 | 87.00  | 19.11 | 每天    | 30.00 | 1.00  | 散步  | 从不吸烟   |
| 160.00 | 63.00 | 90.00  | 24.61 | 每周一次! | 30.00 | 1.00  | 散步  | 从不吸烟   |
| 150.50 | 64.60 | 88.00  | 28.52 | 每天    | 30.00 | 10.00 | 散步  | 从不吸烟   |
| 160.00 | 48.40 | 73.00  | 18.91 | 每天    | 60.00 | 5.00  | 散步  | 从不吸烟   |
| 150.00 | 47.00 | 72.00  | 20.89 | 每天    | 30.00 | 6.00  | 散步  | 从不吸烟   |
| 154.00 | 67.00 | 100.00 | 28.25 | 每天    | 30.00 | 6.00  | 散步  | 从不吸烟   |

|        |       |        |       |       |        |       |    |      |
|--------|-------|--------|-------|-------|--------|-------|----|------|
| 152.00 | 74.00 | 99.00  | 32.03 | 每天    | 60.00  | 2.00  | 散步 | 从不吸烟 |
| 130.00 | 50.00 | 95.00  | 29.59 | 不锻炼   |        |       |    | 从不吸烟 |
| 153.00 | 50.50 | 74.00  | 21.57 | 每天    | 30.00  | 2.00  | 散步 | 从不吸烟 |
| 148.00 | 64.00 | 95.00  | 29.22 | 每天    | 30.00  | 6.00  | 散步 | 从不吸烟 |
| 151.00 | 53.00 | 83.00  | 23.24 | 不锻炼   |        |       |    | 从不吸烟 |
| 152.00 | 58.00 | 82.00  | 25.10 | 每天    | 30.00  | 7.00  | 散步 | 从不吸烟 |
| 153.00 | 55.00 | 80.50  | 23.50 | 每天    | 60.00  | 10.00 | 散步 | 从不吸烟 |
| 136.00 | 55.00 | 103.00 | 29.74 | 每天    | 30.00  | 2.00  | 散步 | 从不吸烟 |
| 148.00 | 62.00 | 101.00 | 28.31 | 每天    | 120.00 | 1.00  | 散步 | 从不吸烟 |
| 146.00 | 51.00 | 87.00  | 23.93 | 不锻炼   |        |       |    | 从不吸烟 |
| 152.00 | 59.00 | 89.00  | 25.54 | 每天    | 30.00  | 14.00 | 散步 | 从不吸烟 |
| 153.00 | 49.00 | 75.00  | 20.93 | 每天    | 30.00  | 1.00  | 散步 | 从不吸烟 |
| 149.00 | 39.50 | 65.00  | 17.79 | 每天    | 30.00  | 2.00  | 散步 | 从不吸烟 |
| 155.00 | 58.00 | 88.00  | 24.14 | 每天    | 60.00  | 1.00  | 跳舞 | 从不吸烟 |
| 147.50 | 38.00 | 61.00  | 17.47 | 每天    | 30.00  | 3.00  | 散步 | 从不吸烟 |
| 145.00 | 64.00 | 97.00  | 30.44 | 不锻炼   |        |       |    | 从不吸烟 |
| 160.00 | 71.50 | 104.00 | 27.93 | 每天    | 60.00  | 2.00  | 散步 | 从不吸烟 |
| 154.00 | 48.00 | 72.00  | 20.24 | 每天    | 60.00  | 6.00  | 散步 | 从不吸烟 |
| 150.00 | 57.00 | 90.00  | 25.33 | 不锻炼   |        |       |    | 从不吸烟 |
| 155.00 | 63.00 | 87.00  | 26.22 | 每天    | 30.00  | 3.00  | 散步 | 从不吸烟 |
| 150.00 | 62.50 | 98.00  | 27.78 | 每天    | 20.00  | 1.00  | 散步 | 从不吸烟 |
| 160.00 | 76.00 | 103.00 | 29.69 | 每天    | 30.00  | 2.00  | 散步 | 从不吸烟 |
| 148.00 | 55.00 | 78.00  | 25.11 | 每天    | 30.00  | 2.00  | 散步 | 从不吸烟 |
| 150.00 | 60.00 | 99.00  | 26.67 | 每天    | 60.00  | 1.00  | 散步 | 从不吸烟 |
| 154.00 | 62.00 | 85.00  | 26.14 | 每周一次! | 30.00  | 1.00  | 散步 | 从不吸烟 |
| 157.00 | 63.50 | 89.00  | 25.76 | 不锻炼   |        |       |    | 从不吸烟 |
| 150.00 | 54.00 | 86.00  | 24.00 | 每天    | 45.00  | 1.00  | 散步 | 从不吸烟 |
| 158.00 | 56.50 | 93.00  | 22.63 | 每天    | 30.00  | 1.00  | 散步 | 从不吸烟 |
| 146.00 | 50.00 | 77.00  | 23.46 | 不锻炼   |        |       |    | 从不吸烟 |
| 156.00 | 57.00 | 88.00  | 23.42 | 每天    | 60.00  | 1.00  | 散步 | 从不吸烟 |
| 145.50 | 49.00 | 80.00  | 23.15 | 不锻炼   |        |       |    | 从不吸烟 |
| 147.00 | 54.00 | 84.00  | 24.99 | 每天    | 30.00  | 4.00  | 散步 | 从不吸烟 |
| 151.00 | 55.00 | 88.00  | 24.12 | 每天    | 30.00  | 5.00  | 散步 | 从不吸烟 |
| 155.00 | 60.00 | 80.00  | 24.97 | 不锻炼   |        |       |    | 从不吸烟 |
| 152.00 | 56.00 | 84.00  | 24.24 | 不锻炼   |        |       |    | 从不吸烟 |
| 143.00 | 50.00 | 85.00  | 24.45 | 不锻炼   |        |       |    | 从不吸烟 |
| 153.00 | 38.00 | 64.00  | 16.23 | 不锻炼   |        |       |    | 从不吸烟 |
| 152.00 | 76.00 | 112.00 | 32.89 | 每天    | 60.00  | 7.00  | 散步 | 从不吸烟 |
| 152.00 | 55.20 | 80.00  | 23.89 | 每天    | 30.00  | 4.00  | 散步 | 从不吸烟 |
| 148.00 | 59.00 | 95.00  | 26.94 | 不锻炼   |        |       |    | 从不吸烟 |
| 149.00 | 52.50 | 90.00  | 23.65 | 不锻炼   |        |       |    | 从不吸烟 |
| 153.00 | 56.00 | 84.00  | 23.92 | 每周一次! | 30.00  | 2.00  | 散步 | 从不吸烟 |
| 153.00 | 55.50 | 85.00  | 23.71 | 每天    | 60.00  | 7.00  | 散步 | 从不吸烟 |
| 156.00 | 70.00 | 98.00  | 28.76 | 每天    | 60.00  | 1.00  | 散步 | 从不吸烟 |
| 157.00 | 65.00 | 92.00  | 26.37 | 每周一次! | 30.00  | 1.00  | 散步 | 从不吸烟 |
| 153.00 | 64.00 | 100.00 | 27.34 | 不锻炼   |        |       |    | 从不吸烟 |
| 153.50 | 70.00 | 104.00 | 29.71 | 不锻炼   |        |       |    | 从不吸烟 |
| 147.00 | 56.50 | 99.00  | 26.15 | 每天    | 60.00  | 4.00  | 散步 | 从不吸烟 |
| 147.00 | 51.00 | 86.00  | 23.60 | 不锻炼   |        |       |    | 从不吸烟 |
| 145.00 | 57.00 | 93.00  | 27.11 | 不锻炼   |        |       |    | 从不吸烟 |
| 146.00 | 51.00 | 75.00  | 23.93 | 每天    | 30.00  | 10.00 | 散步 | 从不吸烟 |

|        |       |        |       |       |        |       |     |      |
|--------|-------|--------|-------|-------|--------|-------|-----|------|
| 157.00 | 51.00 | 75.00  | 20.69 | 每天    | 40.00  | 2.00  | 散步  | 从不吸烟 |
| 139.00 | 51.00 | 87.00  | 26.40 | 每天    | 30.00  | 4.00  | 散步  | 从不吸烟 |
| 150.00 | 42.00 | 73.00  | 18.67 | 不锻炼   |        |       |     | 从不吸烟 |
| 153.00 | 63.00 | 97.00  | 26.91 | 每天    | 30.00  | 3.00  | 散步  | 从不吸烟 |
| 148.00 | 56.20 | 98.00  | 25.66 | 每天    | 30.00  | 1.00  | 散步  | 从不吸烟 |
| 153.00 | 53.00 | 76.00  | 22.64 | 每天    | 30.00  | 5.00  | 散步  | 从不吸烟 |
| 144.50 | 71.00 | 102.00 | 34.00 | 不锻炼   |        |       |     | 从不吸烟 |
| 141.00 | 36.40 | 80.00  | 18.31 | 每天    | 30.00  | 11.00 | 散步  | 从不吸烟 |
| 140.50 | 41.30 | 73.00  | 20.92 | 每天    | 60.00  | 3.00  | 散步  | 从不吸烟 |
| 157.00 | 56.60 | 78.00  | 22.96 | 每天    | 60.00  | 4.00  | 散步  | 从不吸烟 |
| 141.00 | 31.50 | 67.00  | 15.84 | 每天    | 30.00  | 3.00  | 散步  | 从不吸烟 |
| 144.00 | 40.00 | 76.00  | 19.29 | 不锻炼   |        |       |     | 从不吸烟 |
| 155.00 | 62.00 | 91.00  | 25.81 | 不锻炼   |        |       |     | 从不吸烟 |
| 152.00 | 59.00 | 92.00  | 25.54 | 不锻炼   |        |       |     | 从不吸烟 |
| 155.00 | 62.50 | 93.00  | 26.01 | 每天    | 30.00  | 2.00  | 散步  | 从不吸烟 |
| 154.00 | 70.50 | 91.00  | 29.73 | 每天    | 60.00  | 4.00  | 散步  | 从不吸烟 |
| 153.00 | 49.00 | 82.00  | 20.93 | 每天    | 30.00  | 1.00  | 散步  | 从不吸烟 |
| 150.00 | 50.00 | 82.00  | 22.22 | 每天    | 30.00  | 1.00  | 散步  | 从不吸烟 |
| 155.00 | 55.00 | 84.00  | 22.89 | 每天    | 60.00  | 5.00  | 散步  | 从不吸烟 |
| 155.00 | 51.90 | 81.00  | 21.60 | 每天    | 60.00  | 12.00 | 打太极 | 从不吸烟 |
| 154.00 | 61.20 | 93.00  | 25.81 | 每天    | 45.00  | 15.00 | 散步  | 从不吸烟 |
| 149.00 | 57.50 | 79.00  | 25.90 | 每天    | 60.00  | 5.00  | 散步  | 从不吸烟 |
| 150.00 | 53.50 | 80.00  | 23.78 | 每天    | 60.00  | 1.00  | 散步  | 从不吸烟 |
| 144.50 | 43.00 | 69.00  | 20.59 | 不锻炼   |        |       |     | 从不吸烟 |
| 152.00 | 51.00 | 75.00  | 22.07 | 每周一次↓ | 30.00  | 1.00  | 散步  | 从不吸烟 |
| 150.00 | 50.00 | 84.00  | 22.22 | 不锻炼   |        |       |     | 从不吸烟 |
| 151.00 | 47.00 | 84.00  | 20.61 | 每天    | 30.00  | 3.00  | 散步  | 从不吸烟 |
| 141.00 | 41.20 | 69.00  | 20.72 | 不锻炼   |        |       |     | 从不吸烟 |
| 151.50 | 53.80 | 85.00  | 23.44 | 每天    | 60.00  | 20.00 | 散步  | 从不吸烟 |
| 147.00 | 45.00 | 73.00  | 20.82 | 每天    | 30.00  | 5.00  | 散步  | 从不吸烟 |
| 156.00 | 51.50 | 75.00  | 21.16 | 每天    | 30.00  | 10.00 | 散步  | 从不吸烟 |
| 155.00 | 48.00 | 81.00  | 19.98 | 不锻炼   |        |       |     | 从不吸烟 |
| 135.00 | 39.00 | 82.00  | 21.40 | 不锻炼   |        |       |     | 从不吸烟 |
| 160.00 | 64.40 | 85.00  | 25.16 | 每天    | 90.00  | 21.00 | 散步  | 从不吸烟 |
| 157.00 | 56.00 | 84.00  | 22.72 | 不锻炼   |        |       |     | 从不吸烟 |
| 157.00 | 61.00 | 80.00  | 24.75 | 每周一次↓ | 30.00  | 1.00  | 散步  | 从不吸烟 |
| 150.00 | 53.80 | 84.00  | 23.91 | 每天    | 60.00  | 4.00  | 散步  | 从不吸烟 |
| 151.00 | 41.00 | 71.00  | 17.98 | 不锻炼   |        |       |     | 从不吸烟 |
| 152.00 | 61.00 | 90.00  | 26.40 | 不锻炼   |        |       |     | 从不吸烟 |
| 148.00 | 42.00 | 79.00  | 19.17 | 不锻炼   |        |       |     | 从不吸烟 |
| 143.50 | 38.80 | 67.00  | 18.84 | 每天    | 30.00  | 4.00  | 散步  | 从不吸烟 |
| 147.00 | 60.00 | 99.00  | 27.77 | 不锻炼   |        |       |     | 从不吸烟 |
| 151.00 | 52.60 | 81.00  | 23.07 | 每天    | 60.00  | 4.00  | 散步  | 从不吸烟 |
| 152.00 | 52.00 | 80.00  | 22.51 | 每周一次↓ | 30.00  | 1.00  | 散步  | 从不吸烟 |
| 147.50 | 50.50 | 76.00  | 23.21 | 每天    | 60.00  | 1.00  | 散步  | 从不吸烟 |
| 153.50 | 63.30 | 85.00  | 26.87 | 不锻炼   |        |       |     | 从不吸烟 |
| 137.00 | 51.00 | 94.00  | 27.17 | 每周一次↓ | 30.00  | 1.00  | 散步  | 从不吸烟 |
| 147.00 | 65.00 | 102.00 | 30.08 | 每天    | 30.00  | 1.00  | 做操  | 从不吸烟 |
| 149.00 | 54.50 | 86.00  | 24.55 | 每天    | 120.00 | 7.00  | 散步  | 从不吸烟 |
| 146.00 | 63.00 | 95.00  | 29.56 | 不锻炼   |        |       |     | 从不吸烟 |
| 156.00 | 67.00 | 98.00  | 27.53 | 每天    | 60.00  | 16.00 | 跳舞  | 从不吸烟 |

|        |       |        |       |       |       |       |        |      |
|--------|-------|--------|-------|-------|-------|-------|--------|------|
| 153.00 | 59.00 | 94.00  | 25.20 | 每天    | 40.00 | 1.00  | 散步     | 从不吸烟 |
| 150.50 | 41.80 | 83.00  | 18.45 | 不锻炼   |       |       |        | 从不吸烟 |
| 149.00 | 36.00 | 63.00  | 16.22 | 不锻炼   |       |       |        | 从不吸烟 |
| 148.00 | 43.80 | 70.00  | 20.00 | 不锻炼   |       |       |        | 从不吸烟 |
| 148.50 | 60.50 | 94.00  | 27.43 | 不锻炼   |       |       |        | 从不吸烟 |
| 149.00 | 58.00 | 90.00  | 26.12 | 不锻炼   |       |       |        | 从不吸烟 |
| 140.00 | 47.00 | 75.00  | 23.98 | 不锻炼   |       |       |        | 从不吸烟 |
| 140.00 | 49.00 | 81.00  | 25.00 | 每周一次↓ | 30.00 | 1.00  | 散步     | 从不吸烟 |
| 147.00 | 50.00 | 78.00  | 23.14 | 每天    | 30.00 |       |        | 吸烟   |
| 149.50 | 61.20 | 104.00 | 27.38 | 不锻炼   |       |       |        | 从不吸烟 |
| 146.00 | 51.00 | 86.00  | 23.93 | 每天    | 30.00 | 5.00  | 散步, 拍球 | 从不吸烟 |
| 140.00 | 51.00 | 96.00  | 26.02 | 每周一次↓ | 30.00 | 1.00  | 散步     | 从不吸烟 |
| 153.00 | 64.00 | 86.00  | 27.34 | 每周一次↓ | 30.00 | 7.00  | 散步     | 从不吸烟 |
| 149.00 | 64.70 | 97.00  | 29.14 | 每天    | 30.00 | 1.00  | 散步     | 从不吸烟 |
| 152.00 | 62.00 | 78.00  | 26.84 | 不锻炼   |       |       |        | 从不吸烟 |
| 153.00 | 75.30 | 98.00  | 32.17 | 每天    | 15.00 | 2.00  | 散步     | 从不吸烟 |
| 145.00 | 59.50 | 97.00  | 28.30 | 不锻炼   |       |       |        | 从不吸烟 |
| 135.00 | 43.00 | 80.00  | 23.59 | 每天    | 30.00 | 6.00  | 做操     | 从不吸烟 |
| 143.00 | 52.00 | 77.00  | 25.43 | 每天    | 30.00 | 3.00  | 散步     | 从不吸烟 |
| 155.50 | 69.05 | 85.00  | 28.56 | 每天    | 60.00 | 7.00  | 散步     | 从不吸烟 |
| 146.00 | 45.00 | 73.00  | 21.11 | 每天    | 30.00 | 2.00  | 散步     | 从不吸烟 |
| 147.50 | 57.90 | 87.00  | 26.61 | 不锻炼   |       |       |        | 从不吸烟 |
| 146.50 | 52.00 | 87.00  | 24.23 | 每天    | 30.00 | 4.00  | 散步     | 从不吸烟 |
| 154.00 | 72.40 | 101.00 | 30.53 | 每天    | 60.00 | 30.00 | 散步     | 从不吸烟 |
| 157.00 | 62.50 | 83.00  | 25.36 | 每天    | 30.00 | 3.00  | 散步     | 从不吸烟 |
| 148.00 | 51.00 | 79.00  | 23.28 | 每天    | 30.00 | 12.00 | 散步     | 从不吸烟 |
| 160.00 | 61.50 | 94.00  | 24.02 | 每天    | 30.00 | 6.00  | 散步     | 从不吸烟 |
| 149.00 | 61.00 | 89.00  | 27.48 | 不锻炼   |       |       |        | 从不吸烟 |
| 154.00 | 55.00 | 83.00  | 23.19 | 每天    | 60.00 | 2.00  | 散步     | 从不吸烟 |
| 162.00 | 65.00 | 94.00  | 24.77 | 每周一次↓ | 30.00 | 1.00  | 散步     | 从不吸烟 |
| 145.00 | 65.00 | 94.00  | 30.92 | 每天    | 60.00 | 3.00  | 散步     | 从不吸烟 |
| 134.00 | 45.00 | 100.00 | 25.06 | 不锻炼   |       |       |        | 从不吸烟 |
| 148.00 | 54.80 | 85.00  | 25.02 | 每周一次↓ | 10.00 | 6.00  | 散步     | 从不吸烟 |
| 155.00 | 65.50 | 98.00  | 27.26 | 每天    | 15.00 | 1.00  | 散步     | 从不吸烟 |
| 154.00 | 65.00 | 88.00  | 27.41 | 每天    | 20.00 | 10.00 | 散步     | 从不吸烟 |
| 145.00 | 54.00 | 84.00  | 25.68 | 不锻炼   |       |       |        | 从不吸烟 |
| 149.00 | 59.00 | 94.00  | 26.58 | 不锻炼   |       |       |        | 从不吸烟 |
| 157.00 | 49.50 | 76.00  | 20.08 | 每天    | 30.00 | 7.00  | 散步     | 从不吸烟 |
| 153.00 | 57.00 | 94.00  | 24.35 | 每天    | 30.00 | 1.00  | 散步     | 从不吸烟 |
| 151.00 | 45.00 | 79.00  | 19.74 | 每天    | 60.00 | 12.00 | 散步     | 从不吸烟 |
| 157.00 | 67.00 | 85.00  | 27.18 | 每天    | 30.00 | 6.00  | 散步     | 从不吸烟 |
| 152.00 | 45.90 | 78.00  | 19.87 | 不锻炼   |       |       |        | 从不吸烟 |
| 150.00 | 38.00 | 75.00  | 16.89 | 不锻炼   |       |       |        | 从不吸烟 |
| 141.00 | 59.00 | 88.00  | 29.68 | 不锻炼   |       |       |        | 从不吸烟 |
| 145.00 | 58.00 | 88.00  | 27.59 | 每天    | 30.00 | 2.00  | 散步     | 从不吸烟 |
| 152.00 | 60.00 | 88.00  | 25.97 | 不锻炼   |       |       |        | 从不吸烟 |
| 150.00 | 58.00 | 88.00  | 25.78 | 每天    | 30.00 | 3.00  | 散步     | 从不吸烟 |
| 157.00 | 68.00 | 90.00  | 27.59 | 每天    | 30.00 | 3.00  | 散步     | 从不吸烟 |
| 147.50 | 50.70 | 78.00  | 23.30 | 每天    | 60.00 | 11.00 | 散步     | 从不吸烟 |
| 157.00 | 71.00 | 91.00  | 28.80 | 每天    | 30.00 | 3.00  | 散步     | 从不吸烟 |
| 150.00 | 59.00 | 84.00  | 26.22 | 每天    | 60.00 | 3.00  | 散步     | 从不吸烟 |

|        |       |        |       |       |        |       |    |      |
|--------|-------|--------|-------|-------|--------|-------|----|------|
| 156.00 | 52.00 | 80.00  | 21.37 | 不锻炼   |        |       |    | 从不吸烟 |
| 154.00 | 63.00 | 93.00  | 26.56 | 每天    | 60.00  | 6.00  | 散步 | 从不吸烟 |
| 157.50 | 51.00 | 72.00  | 20.56 | 每天    | 60.00  | 3.00  | 散步 | 从不吸烟 |
| 158.00 | 71.00 | 92.00  | 28.44 | 每天    | 60.00  | 6.00  | 散步 | 从不吸烟 |
| 144.00 | 63.00 | 96.00  | 30.38 | 每天    | 30.00  | 6.00  | 散步 | 从不吸烟 |
| 159.50 | 68.90 | 90.00  | 27.08 | 每天    | 30.00  | 2.00  | 散步 | 从不吸烟 |
| 146.00 | 50.00 | 81.00  | 23.46 | 每天    | 30.00  | 1.00  | 散步 | 从不吸烟 |
| 151.50 | 63.20 | 83.00  | 27.54 | 每周一次↓ | 30.00  | 2.00  | 散步 | 从不吸烟 |
| 148.50 | 44.20 | 79.00  | 20.04 | 不锻炼   |        |       |    | 从不吸烟 |
| 141.50 | 59.40 | 93.00  | 29.67 | 每天    | 30.00  | 5.00  | 散步 | 从不吸烟 |
| 153.00 | 60.00 | 88.00  | 25.63 | 每天    | 30.00  | 10.00 | 散步 | 从不吸烟 |
| 154.00 | 52.00 | 78.00  | 21.93 | 每周一次↓ | 30.00  | 1.00  | 散步 | 从不吸烟 |
| 154.50 | 69.00 | 95.00  | 28.91 | 每天    | 30.00  | 4.00  | 散步 | 从不吸烟 |
| 147.00 | 72.00 | 115.00 | 33.32 | 每周一次↓ | 30.00  | 6.00  | 散步 | 从不吸烟 |
| 150.00 | 63.00 | 99.00  | 28.00 | 每天    | 30.00  | 3.00  | 散步 | 从不吸烟 |
| 153.00 | 56.70 | 85.00  | 24.22 | 每天    | 60.00  | 3.00  | 散步 | 从不吸烟 |
| 139.00 | 37.00 | 77.00  | 19.15 | 不锻炼   |        |       |    | 从不吸烟 |
| 158.00 | 62.00 | 88.00  | 24.84 | 每周一次↓ | 30.00  | 7.00  | 散步 | 从不吸烟 |
| 153.00 | 54.00 | 84.00  | 23.07 | 每天    | 30.00  | 6.00  | 散步 | 从不吸烟 |
| 130.00 | 60.00 | 94.00  | 35.50 | 不锻炼   |        |       |    | 从不吸烟 |
| 157.00 | 47.00 | 80.00  | 19.07 | 不锻炼   |        |       |    | 从不吸烟 |
| 140.00 | 55.00 | 92.00  | 28.06 | 每天    | 30.00  | 15.00 | 散步 | 从不吸烟 |
| 150.00 | 52.10 | 86.00  | 23.16 | 每天    | 30.00  | 1.00  | 散步 | 从不吸烟 |
| 134.00 | 42.00 | 82.00  | 23.39 | 每天    | 20.00  | 6.00  | 做操 | 从不吸烟 |
| 156.00 | 54.00 | 77.00  | 22.19 | 不锻炼   |        |       |    | 从不吸烟 |
| 148.00 | 50.10 | 85.00  | 22.87 | 每天    | 30.00  | 1.00  | 散步 | 从不吸烟 |
| 143.50 | 42.00 | 74.00  | 20.40 | 不锻炼   |        |       |    | 从不吸烟 |
| 146.00 | 49.00 | 77.00  | 22.99 | 每天    | 30.00  | 20.00 | 做操 | 从不吸烟 |
| 156.50 | 82.30 | 113.00 | 33.60 | 不锻炼   |        |       |    | 从不吸烟 |
| 156.50 | 55.00 | 84.00  | 22.46 | 每天    | 60.00  | 1.00  | 散步 | 从不吸烟 |
| 148.00 | 55.00 | 88.00  | 25.11 | 不锻炼   |        |       |    | 从不吸烟 |
| 152.50 | 54.60 | 89.00  | 23.48 | 每天    | 30.00  | 2.00  | 散步 | 从不吸烟 |
| 164.00 | 55.00 | 77.00  | 20.45 | 不锻炼   |        |       |    | 从不吸烟 |
| 149.00 | 53.00 | 81.50  | 23.87 | 每天    | 60.00  | 2.00  | 跳舞 | 从不吸烟 |
| 149.00 | 56.50 | 87.00  | 25.45 | 每天    | 30.00  | 5.00  | 散步 | 从不吸烟 |
| 142.50 | 41.00 | 82.00  | 20.19 | 每天    | 60.00  | 3.00  | 散步 | 从不吸烟 |
| 158.00 | 60.00 | 83.00  | 24.03 | 每天    | 30.00  | 4.00  | 散步 | 从不吸烟 |
| 135.00 | 47.80 | 90.00  | 26.23 | 不锻炼   |        |       |    | 从不吸烟 |
| 155.00 | 72.00 | 94.00  | 29.97 | 每天    | 30.00  | 3.00  | 散步 | 从不吸烟 |
| 153.00 | 59.20 | 89.00  | 25.29 | 不锻炼   |        |       |    | 从不吸烟 |
| 153.00 | 58.00 | 88.00  | 24.78 | 不锻炼   |        |       |    | 从不吸烟 |
| 153.00 | 63.00 | 92.00  | 26.91 | 每周一次↓ | 60.00  | 1.00  | 散步 | 从不吸烟 |
| 153.00 | 70.00 | 93.00  | 29.90 | 每天    | 30.00  | 12.00 | 散步 | 从不吸烟 |
| 151.00 | 63.85 | 95.00  | 28.00 | 每天    | 30.00  | 4.00  | 散步 | 从不吸烟 |
| 163.00 | 54.00 | 85.00  | 20.32 | 每天    | 60.00  | 16.00 | 散步 | 从不吸烟 |
| 157.00 | 63.00 | 97.00  | 25.56 | 偶尔    | 30.00  | 2.00  | 散步 | 从不吸烟 |
| 150.00 | 52.80 | 91.00  | 23.47 | 不锻炼   |        |       |    | 从不吸烟 |
| 140.00 | 46.00 | 90.00  | 23.47 | 不锻炼   |        |       |    | 从不吸烟 |
| 150.00 | 33.00 | 70.00  | 14.67 | 不锻炼   |        |       |    | 从不吸烟 |
| 152.00 | 59.00 | 94.00  | 25.54 | 每天    | 30.00  | 1.00  | 散步 | 从不吸烟 |
| 145.00 | 46.50 | 72.00  | 22.12 | 每天    | 120.00 | 5.00  | 散步 | 从不吸烟 |

|        |       |        |       |       |       |       |      |      |
|--------|-------|--------|-------|-------|-------|-------|------|------|
| 155.00 | 52.00 | 83.00  | 21.64 | 每天    | 30.00 | 2.00  | 散步   | 从不吸烟 |
| 155.00 | 57.10 | 91.00  | 23.77 | 每天    | 60.00 | 20.00 | 散步   | 从不吸烟 |
| 151.00 | 66.00 | 95.00  | 28.95 | 每天    | 30.00 | 5.00  | 散步   | 从不吸烟 |
| 146.00 | 40.00 | 79.00  | 18.77 | 不锻炼   |       |       |      | 从不吸烟 |
| 148.00 | 51.90 | 87.00  | 23.69 | 不锻炼   |       |       |      | 从不吸烟 |
| 134.00 | 55.00 | 100.00 | 30.63 | 每天    | 30.00 | 3.00  | 散步   | 从不吸烟 |
| 157.00 | 68.00 | 93.00  | 27.59 | 不锻炼   |       |       |      | 从不吸烟 |
| 144.00 | 36.00 | 75.00  | 17.36 | 不锻炼   |       |       |      | 从不吸烟 |
| 159.00 | 75.00 | 99.00  | 29.67 | 每天    | 60.00 | 11.00 | 散步   | 从不吸烟 |
| 151.00 | 51.00 | 84.00  | 22.37 | 每天    | 60.00 | 9.00  | 散步   | 从不吸烟 |
| 143.00 | 40.00 | 69.00  | 19.56 | 每天    | 30.00 | 8.00  | 散步   | 从不吸烟 |
| 150.00 | 48.00 | 76.00  | 21.33 | 每天    | 30.00 | 6.00  | 散步   | 从不吸烟 |
| 152.00 | 52.00 | 92.00  | 22.51 | 每周一次↓ | 30.00 | 2.00  | 做体操  | 从不吸烟 |
| 144.00 | 52.00 | 82.00  | 25.08 | 不锻炼   |       |       |      | 从不吸烟 |
| 143.00 | 41.00 | 84.00  | 20.05 | 不锻炼   |       |       |      | 从不吸烟 |
| 161.00 | 70.50 | 92.00  | 27.20 | 每天    | 30.00 | 4.00  | 散步   | 从不吸烟 |
| 145.00 | 51.70 | 85.00  | 24.59 | 每天    | 30.00 | 5.00  | 散步   | 从不吸烟 |
| 146.00 | 43.70 | 83.00  | 20.50 | 每天    | 30.00 | 1.00  | 散步   | 从不吸烟 |
| 148.00 | 68.00 | 100.00 | 31.04 | 每天    | 60.00 | 2.00  | 跳舞   | 从不吸烟 |
| 152.00 | 60.00 | 95.00  | 25.97 | 不锻炼   |       |       |      | 从不吸烟 |
| 151.00 | 62.00 | 91.00  | 27.19 | 每周一次↓ | 30.00 | 1.00  | 散步   | 从不吸烟 |
| 158.00 | 63.00 | 86.00  | 25.24 | 每周一次↓ | 20.00 | 6.00  | 散步   | 从不吸烟 |
| 144.50 | 50.70 | 86.00  | 24.28 | 不锻炼   |       |       |      | 从不吸烟 |
| 153.00 | 57.00 | 87.00  | 24.35 | 每天    | 60.00 | 3.00  | 散步   | 从不吸烟 |
| 153.00 | 65.00 | 88.00  | 27.77 | 每天    | 60.00 | 4.00  | 骑自行车 | 从不吸烟 |
| 147.00 | 38.70 | 72.00  | 17.91 | 不锻炼   |       |       |      | 从不吸烟 |
| 152.00 | 49.30 | 77.00  | 21.34 | 不锻炼   |       |       |      | 从不吸烟 |
| 146.00 | 63.00 | 94.00  | 29.56 | 不锻炼   |       |       |      | 从不吸烟 |
| 140.00 | 58.50 | 97.00  | 29.85 | 每天    | 30.00 | 1.00  | 散步   | 从不吸烟 |
| 138.00 | 53.00 | 89.00  | 27.83 | 不锻炼   |       |       |      | 从不吸烟 |
| 160.00 | 79.00 | 94.00  | 30.86 | 不锻炼   |       |       |      | 从不吸烟 |
| 170.50 | 49.50 | 71.00  | 17.03 | 每天    | 60.00 | 1.00  | 散步   | 从不吸烟 |
| 154.00 | 57.00 | 75.00  | 24.03 | 每天    | 60.00 | 11.00 | 散步   | 从不吸烟 |
| 155.00 | 65.00 | 84.00  | 27.06 | 每周一次↓ | 30.00 | 3.00  | 散步   | 从不吸烟 |
| 155.00 | 53.00 | 70.00  | 22.06 | 每天    | 60.00 | 2.00  | 跳舞   | 从不吸烟 |
| 152.00 | 83.00 | 107.00 | 35.92 | 不锻炼   |       |       |      | 从不吸烟 |
| 148.00 | 44.00 | 80.00  | 20.09 | 每天    | 30.00 |       | 散步   | 从不吸烟 |
| 150.00 | 42.00 | 79.00  | 18.67 | 每天    | 60.00 | 7.00  | 散步   | 从不吸烟 |
| 141.00 | 53.00 | 75.00  | 26.66 | 每天    | 30.00 | 10.00 | 散步   | 从不吸烟 |
| 145.00 | 57.00 | 90.00  | 27.11 | 每天    | 30.00 | 1.00  | 散步   | 从不吸烟 |
| 138.00 | 38.00 | 71.00  | 19.95 | 不锻炼   |       |       |      | 从不吸烟 |
| 137.50 | 58.00 | 98.00  | 30.68 | 不锻炼   |       |       |      | 从不吸烟 |
| 152.50 | 63.00 | 91.00  | 27.09 | 不锻炼   |       |       |      | 从不吸烟 |
| 150.00 | 53.20 | 93.00  | 23.64 | 每天    | 60.00 | 4.00  | 散步   | 从不吸烟 |
| 151.00 | 55.00 | 93.00  | 24.12 | 每天    | 60.00 | 2.00  | 散步   | 从不吸烟 |
| 154.00 | 62.00 | 93.00  | 26.14 | 不锻炼   |       |       |      | 从不吸烟 |
| 155.00 | 61.50 | 80.00  | 25.60 | 每天    | 30.00 | 6.00  | 散步   | 从不吸烟 |
| 154.50 | 55.00 | 82.00  | 23.04 | 每天    | 30.00 | 5.00  | 散步   | 从不吸烟 |
| 156.00 | 65.00 | 97.00  | 26.71 | 每天    | 30.00 | 1.00  | 散步   | 从不吸烟 |
| 149.00 | 50.00 | 79.00  | 22.52 | 不锻炼   |       |       |      | 从不吸烟 |
| 148.00 | 54.00 | 86.00  | 24.65 | 每天    | 30.00 | 1.00  | 骑自行车 | 从不吸烟 |

|        |       |        |       |       |       |       |                    |      |
|--------|-------|--------|-------|-------|-------|-------|--------------------|------|
| 143.00 | 50.80 | 85.00  | 24.84 | 不锻炼   |       |       |                    | 从不吸烟 |
| 153.00 | 55.00 | 70.00  | 23.50 | 每天    | 40.00 | 16.00 | 散步, 骑 <sup>2</sup> | 从不吸烟 |
| 151.00 | 63.00 | 83.00  | 27.63 | 每天    | 30.00 | 3.00  | 散步                 | 从不吸烟 |
| 156.00 | 47.00 | 74.00  | 19.31 | 每周一次! | 40.00 | 1.00  | 散步                 | 从不吸烟 |
| 151.00 | 52.00 | 87.00  | 22.81 | 每天    | 30.00 | 4.00  | 散步                 | 从不吸烟 |
| 154.00 | 79.00 | 105.00 | 33.31 | 不锻炼   |       |       |                    | 从不吸烟 |
| 153.00 | 65.40 | 94.00  | 27.94 | 每天    | 30.00 | 2.00  | 散步                 | 从不吸烟 |
| 152.00 | 40.00 | 67.00  | 17.31 | 每天    | 30.00 | 1.00  | 散步                 | 从不吸烟 |
| 151.00 | 56.00 | 84.00  | 24.56 | 每天    | 30.00 | 10.00 | 散步                 | 从不吸烟 |
| 173.00 | 84.70 | 107.00 | 28.30 | 不锻炼   |       |       |                    | 从不吸烟 |
| 161.50 | 62.50 | 85.00  | 23.96 | 不锻炼   |       |       |                    | 从不吸烟 |
| 148.00 | 40.00 | 70.00  | 18.26 | 每周一次! | 30.00 | 3.00  | 散步                 | 从不吸烟 |
| 158.00 | 64.50 | 91.00  | 25.84 | 不锻炼   |       |       |                    | 从不吸烟 |
| 143.00 | 53.00 | 90.00  | 25.92 | 每天    | 30.00 | 2.00  | 散步                 | 从不吸烟 |
| 148.00 | 61.00 | 95.00  | 27.85 | 每天    | 60.00 | 4.00  | 散步                 | 从不吸烟 |
| 140.00 | 42.00 | 72.00  | 21.43 | 每天    | 60.00 | 3.00  | 体操                 | 从不吸烟 |
| 160.00 | 50.00 | 75.00  | 19.53 | 每天    | 60.00 | 4.00  | 散步                 | 从不吸烟 |
| 155.00 | 61.00 | 85.00  | 25.39 | 每天    | 30.00 | 5.00  | 散步                 | 从不吸烟 |
| 155.50 | 54.60 | 80.00  | 22.58 | 每天    | 30.00 | 2.00  | 散步                 | 从不吸烟 |
| 152.50 | 66.00 | 91.00  | 28.38 | 不锻炼   |       |       |                    | 从不吸烟 |
| 153.00 | 59.00 | 86.00  | 25.20 | 每天    | 30.00 | 6.00  | 做操                 | 从不吸烟 |
| 146.00 | 43.00 | 68.00  | 20.17 | 每天    | 60.00 | 4.00  | 散步                 | 从不吸烟 |
| 157.00 | 60.00 | 91.00  | 24.34 | 每天    | 20.00 | 2.00  | 散步                 | 从不吸烟 |
| 154.00 | 58.00 | 79.00  | 24.46 | 不锻炼   |       |       |                    | 从不吸烟 |
| 149.00 | 61.00 | 94.00  | 27.48 | 不锻炼   |       |       |                    | 从不吸烟 |
| 150.00 | 52.20 | 80.00  | 23.20 | 每天    | 20.00 | 4.00  | 体操                 | 从不吸烟 |
| 148.00 | 51.00 | 65.00  | 23.28 | 每天    | 30.00 | 1.00  | 散步                 | 从不吸烟 |
| 152.00 | 50.00 | 72.00  | 21.64 | 不锻炼   |       |       |                    | 从不吸烟 |
| 152.50 | 50.00 | 78.00  | 21.50 | 每天    | 30.00 | 10.00 | 散步                 | 从不吸烟 |
| 150.50 | 70.00 | 94.00  | 30.90 | 每天    | 30.00 | 4.00  | 散步                 | 从不吸烟 |
| 151.00 | 45.00 | 71.00  | 19.74 | 每天    | 60.00 | 10.00 | 散步                 | 从不吸烟 |
| 157.00 | 57.00 | 88.00  | 23.12 | 每天    | 30.00 | 2.00  | 散步                 | 从不吸烟 |
| 154.00 | 42.60 | 74.00  | 17.96 | 每天    | 60.00 | 30.00 | 散步                 | 从不吸烟 |
| 160.00 | 67.70 | 98.00  | 26.45 | 不锻炼   |       |       |                    | 从不吸烟 |
| 150.00 | 51.00 | 76.00  | 22.67 | 每天    | 60.00 | 21.00 | 散步                 | 从不吸烟 |
| 159.00 | 69.50 | 93.00  | 27.49 | 不锻炼   |       |       |                    | 从不吸烟 |
| 150.00 | 50.50 | 86.00  | 22.44 | 不锻炼   |       |       |                    | 从不吸烟 |
| 150.00 | 38.00 | 65.00  | 16.89 | 每天    | 30.00 | 11.00 | 散步                 | 从不吸烟 |
| 146.00 | 62.00 | 96.00  | 29.09 | 每周一次! | 30.00 | 2.00  | 散步                 | 从不吸烟 |
| 140.00 | 45.00 | 84.00  | 22.96 | 每天    | 30.00 | 4.00  | 散步                 | 从不吸烟 |
| 151.00 | 66.60 | 94.00  | 29.21 | 每天    | 30.00 | 4.00  | 散步                 | 从不吸烟 |
| 163.50 | 66.00 | 94.00  | 24.69 | 每天    | 30.00 | 3.00  | 散步                 | 从不吸烟 |
| 154.50 | 68.50 | 91.00  | 28.70 | 每天    | 30.00 | 4.00  | 散步                 | 从不吸烟 |
| 155.00 | 62.30 | 82.00  | 25.93 | 不锻炼   |       |       |                    | 从不吸烟 |
| 149.50 | 57.00 | 84.00  | 25.50 | 每天    | 60.00 | 11.00 | 散步                 | 从不吸烟 |
| 157.00 | 63.00 | 77.00  | 25.56 | 每天    | 30.00 | 2.00  | 散步                 | 从不吸烟 |
| 147.00 | 62.00 | 95.00  | 28.69 | 每天    | 30.00 | 4.00  | 散步                 | 从不吸烟 |
| 151.00 | 80.00 | 108.00 | 35.09 | 每周一次! | 40.00 | 1.00  | 散步                 | 从不吸烟 |
| 149.00 | 52.00 | 85.00  | 23.42 | 每天    | 40.00 | 11.00 | 散步                 | 从不吸烟 |
| 146.00 | 55.00 | 87.00  | 25.80 | 每天    | 30.00 | 4.00  | 散步                 | 从不吸烟 |
| 151.00 | 83.50 | 108.00 | 36.62 | 不锻炼   |       |       |                    | 从不吸烟 |

|        |       |        |       |       |       |       |       |      |
|--------|-------|--------|-------|-------|-------|-------|-------|------|
| 158.50 | 60.00 | 86.00  | 23.88 | 每天    | 60.00 | 7.00  | 散步    | 从不吸烟 |
| 150.50 | 41.50 | 66.00  | 18.32 | 不锻炼   |       |       |       | 从不吸烟 |
| 150.00 | 44.00 | 70.00  | 19.56 | 不锻炼   |       |       |       | 从不吸烟 |
| 149.00 | 49.00 | 82.00  | 22.07 | 每周一次! | 30.00 | 1.00  | 散步    | 从不吸烟 |
| 153.00 | 52.00 | 88.00  | 22.21 | 每天    | 60.00 | 3.00  | 散步    | 从不吸烟 |
| 148.00 | 61.00 | 89.00  | 27.85 | 每天    | 30.00 | 2.00  | 散步    | 从不吸烟 |
| 153.00 | 60.00 | 86.00  | 25.63 | 每天    | 60.00 | 7.00  | 散步    | 从不吸烟 |
| 160.00 | 71.00 | 100.00 | 27.73 | 不锻炼   |       |       |       | 从不吸烟 |
| 144.00 | 48.00 | 90.00  | 23.15 | 每天    | 30.00 | 1.00  | 散步    | 从不吸烟 |
| 152.00 | 61.50 | 99.00  | 26.62 | 每天    | 45.00 | 1.00  | 散步    | 从不吸烟 |
| 152.00 | 55.00 | 79.00  | 23.81 | 每天    | 30.00 | 8.00  | 散步    | 从不吸烟 |
| 154.00 | 46.80 | 74.00  | 19.73 | 每天    | 60.00 | 4.00  | 散步    | 从不吸烟 |
| 158.00 | 43.00 | 75.00  | 17.22 | 每天    | 30.00 | 14.00 | 散步    | 从不吸烟 |
| 149.00 | 50.00 | 79.00  | 22.52 | 不锻炼   |       |       |       | 从不吸烟 |
| 151.50 | 49.00 | 79.00  | 21.35 | 每天    | 30.00 | 6.00  | 散步    | 从不吸烟 |
| 148.00 | 36.00 | 68.00  | 16.44 | 每天    | 30.00 | 3.00  | 散步    | 从不吸烟 |
| 136.00 | 42.00 | 84.00  | 22.71 | 每天    | 30.00 | 3.00  | 散步    | 从不吸烟 |
| 152.00 | 57.00 | 97.00  | 24.67 | 每天    | 30.00 | 2.00  | 散步    | 从不吸烟 |
| 154.00 | 64.00 | 88.00  | 26.99 | 每天    | 30.00 | 4.00  | 散步    | 从不吸烟 |
| 151.00 | 58.00 | 85.00  | 25.44 | 不锻炼   |       |       |       | 从不吸烟 |
| 149.00 | 45.00 | 70.00  | 20.27 | 每天    | 60.00 | 10.00 | 散步    | 从不吸烟 |
| 157.00 | 73.90 | 91.00  | 29.98 | 每天    | 60.00 | 12.00 | 散步    | 从不吸烟 |
| 153.50 | 49.50 | 77.00  | 21.01 | 不锻炼   |       |       |       | 从不吸烟 |
| 148.00 | 42.00 | 77.00  | 19.17 | 每周一次! | 20.00 | 1.00  | 散步    | 从不吸烟 |
| 153.00 | 60.00 | 88.00  | 25.63 | 每天    | 60.00 | 7.00  | 散步    | 从不吸烟 |
| 140.00 | 52.00 | 84.00  | 26.53 | 每天    | 60.00 | 5.00  | 散步    | 从不吸烟 |
| 154.00 | 61.50 | 86.00  | 25.93 | 每天    | 60.00 | 2.00  | 散步    | 从不吸烟 |
| 142.00 | 41.50 | 83.00  | 20.58 | 不锻炼   |       |       |       | 从不吸烟 |
| 134.50 | 55.15 | 87.00  | 30.49 | 不锻炼   |       |       |       | 从不吸烟 |
| 158.00 | 52.50 | 90.00  | 21.03 | 每天    | 30.00 | 3.00  | 散步    | 从不吸烟 |
| 154.00 | 59.00 | 88.00  | 24.88 | 不锻炼   |       |       |       | 从不吸烟 |
| 151.50 | 71.00 | 95.00  | 30.93 | 每周一次! | 30.00 | 1.00  | 散步    | 从不吸烟 |
| 155.00 | 50.00 | 84.00  | 20.81 | 每天    | 30.00 | 4.00  | 散步    | 从不吸烟 |
| 135.00 | 44.00 | 79.00  | 24.14 | 每天    | 30.00 | 8.00  | 散步    | 从不吸烟 |
| 156.00 | 43.00 | 68.00  | 17.67 | 每天    | 30.00 | 3.00  | 散步    | 从不吸烟 |
| 141.00 | 44.00 | 88.00  | 22.13 | 不锻炼   |       |       |       | 从不吸烟 |
| 148.00 | 53.00 | 84.00  | 24.20 | 每周一次! | 60.00 | 6.00  | 散步    | 从不吸烟 |
| 144.00 | 58.50 | 98.00  | 28.21 | 每周一次! | 30.00 | 2.00  | 散步    | 从不吸烟 |
| 155.00 | 52.50 | 84.00  | 21.85 | 每天    | 60.00 | 3.00  | 散步、跳绳 | 从不吸烟 |
| 152.00 | 63.00 | 106.00 | 27.27 | 不锻炼   |       |       |       | 从不吸烟 |
| 148.00 | 57.60 | 90.00  | 26.30 | 不锻炼   |       |       |       | 从不吸烟 |
| 147.00 | 52.00 | 89.00  | 24.06 | 不锻炼   |       |       |       | 从不吸烟 |
| 149.00 | 63.00 | 95.00  | 28.38 | 不锻炼   |       |       |       | 从不吸烟 |
| 132.00 | 39.00 | 86.00  | 22.38 | 不锻炼   |       |       |       | 从不吸烟 |
| 148.00 | 50.50 | 91.00  | 23.06 | 不锻炼   |       |       |       | 从不吸烟 |
| 151.50 | 51.00 | 80.00  | 22.22 | 每天    | 60.00 | 6.00  | 散步    | 从不吸烟 |
| 154.00 | 60.00 | 90.00  | 25.30 | 每天    | 60.00 | 9.00  | 散步    | 从不吸烟 |
| 150.00 | 61.00 | 99.00  | 27.11 | 每天    | 60.00 | 1.00  | 散步    | 从不吸烟 |
| 145.00 | 70.00 | 109.00 | 33.29 | 每天    | 30.00 | 7.00  | 散步    | 从不吸烟 |
| 145.00 | 43.50 | 74.00  | 20.69 | 每天    | 30.00 | 10.00 | 散步    | 从不吸烟 |
| 142.00 | 61.00 | 99.00  | 30.25 | 每天    | 30.00 | 7.00  | 散步    | 从不吸烟 |

|        |       |        |       |       |       |       |     |      |
|--------|-------|--------|-------|-------|-------|-------|-----|------|
| 147.00 | 57.00 | 86.00  | 26.38 | 不锻炼   |       |       |     | 从不吸烟 |
| 156.00 | 58.00 | 90.00  | 23.83 | 不锻炼   |       |       |     | 从不吸烟 |
| 160.00 | 57.00 | 80.00  | 22.27 | 每天    | 60.00 | 7.00  | 散步  | 从不吸烟 |
| 154.00 | 57.00 | 86.00  | 24.03 | 每天    | 60.00 | 1.00  | 散步  | 从不吸烟 |
| 153.00 | 64.50 | 93.00  | 27.55 | 每天    | 30.00 | 2.00  | 散步  | 从不吸烟 |
| 155.00 | 56.00 | 90.00  | 23.31 | 每天    | 30.00 | 1.00  | 散步  | 从不吸烟 |
| 137.00 | 41.00 | 80.00  | 21.84 | 不锻炼   |       |       |     | 从不吸烟 |
| 157.00 | 42.00 | 69.00  | 17.04 | 每天    | 60.00 | 4.00  | 散步  | 从不吸烟 |
| 157.00 | 63.00 | 88.00  | 25.56 | 每天    | 30.00 | 3.00  | 散步  | 从不吸烟 |
| 145.00 | 47.70 | 86.00  | 22.69 | 每天    | 30.00 | 13.00 | 散步  | 从不吸烟 |
| 152.00 | 53.00 | 84.00  | 22.94 | 不锻炼   |       |       |     | 从不吸烟 |
| 151.00 | 59.00 | 88.00  | 25.88 | 每天    | 40.00 | 4.00  | 散步  | 从不吸烟 |
| 152.00 | 48.00 | 75.00  | 20.78 | 不锻炼   |       |       |     | 从不吸烟 |
| 153.00 | 50.20 | 70.00  | 21.44 | 每天    | 60.00 | 5.00  | 散步  | 从不吸烟 |
| 150.00 | 70.00 | 97.00  | 31.11 | 每天    | 60.00 | 6.00  | 散步  | 从不吸烟 |
| 154.00 | 62.50 | 90.00  | 26.35 | 不锻炼   |       |       |     | 从不吸烟 |
| 148.00 | 47.00 | 77.00  | 21.46 | 不锻炼   |       |       |     | 从不吸烟 |
| 158.00 | 37.90 | 60.00  | 15.18 | 不锻炼   |       |       |     | 从不吸烟 |
| 163.00 | 82.00 | 102.00 | 30.86 | 每天    | 60.00 | 2.00  | 散步  | 从不吸烟 |
| 150.00 | 60.00 | 90.00  | 26.67 | 每天    | 30.00 | 3.00  | 散步  | 从不吸烟 |
| 156.50 | 60.00 | 92.00  | 24.50 | 每天    | 30.00 | 1.00  | 散步  | 从不吸烟 |
| 138.00 | 50.20 | 86.00  | 26.36 | 每天    | 30.00 | 10.00 | 散步  | 从不吸烟 |
| 140.00 | 50.00 | 90.00  | 25.51 | 不锻炼   |       |       |     | 从不吸烟 |
| 149.00 | 65.00 | 99.00  | 29.28 | 每天    | 30.00 | 3.00  | 散步  | 从不吸烟 |
| 149.00 | 61.90 | 90.00  | 27.88 | 每天    | 15.00 | 1.00  | 散步  | 从不吸烟 |
| 136.00 | 39.00 | 80.00  | 21.09 | 每天    | 30.00 | 6.00  | 散步  | 从不吸烟 |
| 140.00 | 51.00 | 80.00  | 26.02 | 每天    | 60.00 | 7.00  | 散步  | 从不吸烟 |
| 147.00 | 54.00 | 78.00  | 24.99 | 每天    | 30.00 | 1.00  | 散步  | 从不吸烟 |
| 151.00 | 36.30 | 67.00  | 15.92 | 每天    | 60.00 | 6.00  | 散步  | 从不吸烟 |
| 155.50 | 74.40 | 96.00  | 30.77 | 每天    | 60.00 | 10.00 | 散步  | 从不吸烟 |
| 154.00 | 50.00 | 82.00  | 21.08 | 每天    | 60.00 | 10.00 | 散步  | 从不吸烟 |
| 153.00 | 64.00 | 87.00  | 27.34 | 每天    | 30.00 | 11.00 | 散步  | 从不吸烟 |
| 138.00 | 47.50 | 86.00  | 24.94 | 每天    | 20.00 | 3.00  | 散步  | 从不吸烟 |
| 156.00 | 59.50 | 85.00  | 24.45 | 每天    | 30.00 | 9.00  | 散步  | 从不吸烟 |
| 147.00 | 68.50 | 91.00  | 31.70 | 每天    | 30.00 | 1.00  | 散步  | 从不吸烟 |
| 148.00 | 59.50 | 93.00  | 27.16 | 不锻炼   |       |       |     | 从不吸烟 |
| 160.00 | 46.00 | 78.00  | 17.97 | 每天    | 60.00 | 10.00 | 打太极 | 从不吸烟 |
| 161.00 | 72.00 | 91.00  | 27.78 | 每天    | 30.00 | 4.00  | 散步  | 从不吸烟 |
| 147.00 | 51.00 | 80.00  | 23.60 | 不锻炼   |       |       |     | 从不吸烟 |
| 160.00 | 50.00 | 80.00  | 19.53 | 每天    | 30.00 | 4.00  | 散步  | 从不吸烟 |
| 164.00 | 68.00 | 86.00  | 25.28 | 每天    | 30.00 | 3.00  | 散步  | 从不吸烟 |
| 148.00 | 55.00 | 86.00  | 25.11 | 每天    | 30.00 | 4.00  | 散步  | 从不吸烟 |
| 162.50 | 54.50 | 74.00  | 20.64 | 不锻炼   |       |       |     | 从不吸烟 |
| 158.00 | 67.80 | 96.00  | 27.16 | 每天    | 60.00 | 1.00  | 散步  | 从不吸烟 |
| 148.00 | 49.60 | 83.00  | 22.64 | 不锻炼   |       |       |     | 从不吸烟 |
| 150.00 | 53.50 | 78.00  | 23.78 | 每天    | 15.00 | 1.00  | 跳舞  | 从不吸烟 |
| 147.00 | 50.00 | 87.00  | 23.14 | 每周一次! | 30.00 | 2.00  | 散步  | 从不吸烟 |
| 150.00 | 58.00 | 81.00  | 25.78 | 每天    | 60.00 | 10.00 | 跳舞  | 从不吸烟 |
| 144.00 | 48.00 | 76.00  | 23.15 | 每天    | 30.00 | 3.00  | 散步  | 从不吸烟 |
| 161.00 | 60.00 | 85.00  | 23.15 | 每天    | 30.00 | 3.00  | 散步  | 从不吸烟 |
| 149.00 | 42.00 | 69.00  | 18.92 | 每天    | 30.00 | 1.00  | 散步  | 从不吸烟 |

|        |       |        |       |       |       |       |    |      |
|--------|-------|--------|-------|-------|-------|-------|----|------|
| 138.00 | 56.00 | 95.00  | 29.41 | 不锻炼   |       |       |    | 从不吸烟 |
| 147.00 | 54.00 | 88.00  | 24.99 | 不锻炼   |       |       |    | 从不吸烟 |
| 150.00 | 57.00 | 90.00  | 25.33 | 不锻炼   |       |       |    | 从不吸烟 |
| 157.00 | 65.00 | 81.00  | 26.37 | 每天    | 60.00 | 2.00  | 散步 | 从不吸烟 |
| 157.00 | 60.00 | 88.00  | 24.34 | 每周一次! | 30.00 | 1.00  | 散步 | 从不吸烟 |
| 160.00 | 63.00 | 92.00  | 24.61 | 每天    | 30.00 | 3.00  | 散步 | 从不吸烟 |
| 145.00 | 47.00 | 86.00  | 22.35 | 每周一次! | 30.00 |       | 散步 | 从不吸烟 |
| 146.50 | 56.00 | 83.00  | 26.09 | 每天    | 30.00 | 2.00  | 散步 | 从不吸烟 |
| 150.00 | 65.00 | 103.00 | 28.89 | 每天    | 30.00 | 10.00 | 散步 | 从不吸烟 |
| 150.00 | 58.00 | 98.00  | 25.78 | 每天    | 60.00 | 1.00  | 散步 | 从不吸烟 |
| 157.00 | 58.00 | 89.00  | 23.53 | 不锻炼   |       |       |    | 从不吸烟 |
| 143.00 | 54.00 | 92.00  | 26.41 | 不锻炼   |       |       |    | 从不吸烟 |
| 144.00 | 57.50 | 102.00 | 27.73 | 不锻炼   |       |       |    | 从不吸烟 |
| 155.00 | 59.00 | 86.00  | 24.56 | 每天    | 30.00 | 3.00  | 散步 | 从不吸烟 |
| 140.00 | 47.80 | 77.00  | 24.39 | 每天    | 60.00 | 6.00  | 散步 | 从不吸烟 |
| 149.00 | 60.00 | 92.00  | 27.03 | 不锻炼   |       |       |    | 从不吸烟 |
| 144.00 | 50.00 | 82.00  | 24.11 | 每天    | 60.00 | 8.00  | 散步 | 从不吸烟 |
| 146.00 | 52.00 | 82.00  | 24.39 | 不锻炼   |       |       |    | 从不吸烟 |
| 152.00 | 54.00 | 84.00  | 23.37 | 不锻炼   |       |       |    | 从不吸烟 |
| 139.00 | 67.00 | 108.00 | 34.68 | 每天    | 30.00 | 2.00  | 散步 | 从不吸烟 |
| 143.00 | 52.50 | 90.00  | 25.67 | 每天    | 30.00 | 2.00  | 散步 | 从不吸烟 |
| 154.00 | 71.00 | 99.00  | 29.94 | 每天    | 60.00 | 3.00  | 散步 | 从不吸烟 |
| 148.00 | 48.00 | 88.00  | 21.91 | 不锻炼   |       |       |    | 从不吸烟 |
| 150.00 | 38.00 | 70.00  | 16.89 | 不锻炼   |       |       |    | 从不吸烟 |
| 148.50 | 58.00 | 90.00  | 26.30 | 不锻炼   |       |       |    | 从不吸烟 |
| 154.00 | 47.00 | 71.00  | 19.82 | 不锻炼   |       |       |    | 从不吸烟 |
| 157.00 | 59.00 | 86.00  | 23.94 | 不锻炼   |       |       |    | 从不吸烟 |
| 152.00 | 50.00 | 80.00  | 21.64 | 不锻炼   |       |       |    | 从不吸烟 |
| 155.00 | 65.00 | 87.00  | 27.06 | 每天    | 30.00 | 3.00  | 散步 | 从不吸烟 |
| 149.00 | 55.00 | 89.00  | 24.77 | 每天    | 60.00 | 41.00 | 散步 | 从不吸烟 |
| 145.00 | 52.00 | 76.00  | 24.73 | 每周一次! | 20.00 | 1.00  | 散步 | 从不吸烟 |
| 163.00 | 65.00 | 93.00  | 24.46 | 每天    | 60.00 | 2.00  | 散步 | 从不吸烟 |
| 150.00 | 42.00 | 72.00  | 18.67 | 每周一次! | 30.00 | 1.00  | 散步 | 从不吸烟 |
| 151.00 | 40.00 | 63.00  | 17.54 | 不锻炼   |       |       |    | 从不吸烟 |
| 155.00 | 47.00 | 80.00  | 19.56 | 每天    | 15.00 | 10.00 | 散步 | 从不吸烟 |
| 143.00 | 49.00 | 87.00  | 23.96 | 每天    | 30.00 | 7.00  | 散步 | 从不吸烟 |
| 147.00 | 63.60 | 96.00  | 29.43 | 每天    | 30.00 | 4.00  | 散步 | 从不吸烟 |
| 165.00 | 63.10 | 87.00  | 23.18 | 不锻炼   |       |       |    | 从不吸烟 |
| 150.00 | 33.50 | 60.00  | 14.89 | 不锻炼   |       |       |    | 从不吸烟 |
| 153.00 | 71.00 | 91.00  | 30.33 | 不锻炼   |       |       |    | 从不吸烟 |
| 156.00 | 54.00 | 76.00  | 22.19 | 每天    | 60.00 | 3.00  | 跳舞 | 从不吸烟 |
| 157.00 | 67.00 | 93.00  | 27.18 | 每天    | 30.00 | 3.00  | 散步 | 从不吸烟 |
| 151.00 | 50.00 | 74.00  | 21.93 | 不锻炼   |       |       |    | 从不吸烟 |
| 163.00 | 72.70 | 102.00 | 27.36 | 每天    | 60.00 | 8.00  | 散步 | 从不吸烟 |
| 147.00 | 59.00 | 86.00  | 27.30 | 每天    | 30.00 | 5.00  | 散步 | 从不吸烟 |
| 138.00 | 47.00 | 72.00  | 24.68 | 每天    | 30.00 | 8.00  | 散步 | 从不吸烟 |
| 148.00 | 54.00 | 86.00  | 24.65 | 每周一次! | 30.00 | 1.00  | 散步 | 从不吸烟 |
| 145.00 | 52.00 | 85.00  | 24.73 | 每天    | 30.00 | 1.00  | 散步 | 从不吸烟 |
| 155.00 | 55.00 | 83.00  | 22.89 | 每天    | 30.00 | 3.00  | 散步 | 从不吸烟 |
| 161.00 | 66.50 | 94.00  | 25.65 | 每天    | 30.00 | 10.00 | 散步 | 从不吸烟 |
| 147.00 | 48.90 | 77.00  | 22.63 | 每天    | 30.00 | 7.00  | 散步 | 从不吸烟 |

|        |       |        |       |       |       |       |       |      |
|--------|-------|--------|-------|-------|-------|-------|-------|------|
| 146.00 | 62.00 | 92.00  | 29.09 | 每天    | 60.00 | 8.00  | 散步    | 从不吸烟 |
| 141.50 | 53.50 | 87.00  | 26.72 | 不锻炼   |       |       |       | 从不吸烟 |
| 150.50 | 67.20 | 101.00 | 29.67 | 不锻炼   |       |       |       | 从不吸烟 |
| 158.00 | 60.00 | 80.00  | 24.03 | 每天    | 60.00 | 12.00 | 散步    | 从不吸烟 |
| 154.00 | 58.50 | 91.00  | 24.67 | 每天    | 30.00 | 1.00  | 散步    | 从不吸烟 |
| 155.50 | 73.00 | 105.00 | 30.19 | 不锻炼   |       |       |       | 从不吸烟 |
| 145.00 | 37.00 | 70.00  | 17.60 | 每周一次! | 10.00 | 1.00  | 散步    | 从不吸烟 |
| 143.50 | 36.00 | 73.00  | 17.48 | 每天    | 30.00 | 3.00  | 散步    | 从不吸烟 |
| 145.00 | 68.00 | 96.00  | 32.34 | 不锻炼   |       |       |       | 从不吸烟 |
| 145.50 | 63.35 | 98.00  | 29.92 | 每天    | 60.00 | 5.00  | 散步    | 从不吸烟 |
| 142.00 | 53.70 | 96.00  | 26.63 | 每天    | 30.00 | 3.00  | 散步    | 从不吸烟 |
| 151.00 | 56.00 | 93.00  | 24.56 | 不锻炼   |       |       |       | 从不吸烟 |
| 147.00 | 58.00 | 92.00  | 26.84 | 每周一次! | 30.00 | 2.00  | 散步    | 从不吸烟 |
| 152.00 | 50.00 | 85.00  | 21.64 | 每天    | 30.00 | 2.00  | 散步    | 从不吸烟 |
| 152.00 | 61.00 | 86.00  | 26.40 | 每天    | 60.00 | 4.00  | 散步    | 从不吸烟 |
| 154.00 | 67.00 | 93.00  | 28.25 | 每天    | 60.00 | 12.00 | 散步、跳舞 | 从不吸烟 |
| 155.00 | 48.30 | 80.00  | 20.10 | 每天    | 30.00 | 2.00  | 散步    | 从不吸烟 |
| 148.00 | 51.00 | 83.00  | 23.28 | 每天    | 30.00 | 3.00  | 散步    | 从不吸烟 |
| 149.00 | 57.50 | 86.00  | 25.90 | 每天    | 30.00 | 8.00  | 散步    | 从不吸烟 |
| 149.00 | 45.00 | 68.00  | 20.27 | 每天    | 60.00 | 3.00  | 打羽毛球  | 从不吸烟 |
| 155.50 | 59.00 | 88.00  | 24.40 | 每天    | 30.00 | 2.00  | 散步    | 从不吸烟 |
| 143.00 | 60.00 | 96.00  | 29.34 | 偶尔    | 30.00 | 3.00  | 散步    | 从不吸烟 |
| 155.00 | 58.00 | 92.00  | 24.14 | 每天    | 30.00 | 3.00  | 散步    | 从不吸烟 |
| 148.00 | 68.00 | 102.00 | 31.04 | 每天    | 30.00 | 5.00  | 散步    | 从不吸烟 |
| 161.50 | 62.00 | 79.00  | 23.77 | 每天    | 30.00 | 10.00 | 散步    | 从不吸烟 |
| 152.50 | 51.40 | 78.00  | 22.10 | 每天    | 60.00 | 3.00  | 散步    | 从不吸烟 |
| 146.00 | 48.00 | 84.00  | 22.52 | 不锻炼   |       |       |       | 从不吸烟 |
| 159.00 | 75.00 | 102.00 | 29.67 | 每天    | 30.00 | 5.00  | 散步    | 从不吸烟 |
| 163.00 | 66.00 | 86.00  | 24.84 | 每天    | 30.00 | 3.00  | 散步    | 从不吸烟 |
| 151.00 | 56.00 | 83.00  | 24.56 | 每天    | 30.00 | 10.00 | 散步    | 从不吸烟 |
| 159.00 | 61.20 | 85.00  | 24.21 | 不锻炼   |       |       |       | 从不吸烟 |
| 145.00 | 50.50 | 80.00  | 24.02 | 每天    | 30.00 | 10.00 | 散步    | 从不吸烟 |
| 173.00 | 80.00 | 93.00  | 26.73 | 每天    | 30.00 | 2.00  | 散步    | 从不吸烟 |
| 155.00 | 71.30 | 96.00  | 29.68 | 每天    | 30.00 | 2.00  | 散步    | 从不吸烟 |
| 151.00 | 54.00 | 83.00  | 23.68 | 每天    | 60.00 | 6.00  | 散步    | 从不吸烟 |
| 152.00 | 51.00 | 84.00  | 22.07 | 每天    | 30.00 | 4.00  | 散步    | 从不吸烟 |
| 154.00 | 55.00 | 80.00  | 23.19 | 每天    | 60.00 | 7.00  | 散步    | 从不吸烟 |
| 145.00 | 60.90 | 88.00  | 28.97 | 每天    | 30.00 | 1.00  | 散步    | 从不吸烟 |
| 152.00 | 71.40 | 109.00 | 30.90 | 每天    | 30.00 | 1.00  | 散步    | 从不吸烟 |
| 151.00 | 78.00 | 104.00 | 34.21 | 每天    | 60.00 | 7.00  | 跳舞    | 从不吸烟 |
| 144.00 | 55.00 | 88.00  | 26.52 | 每天    | 60.00 | 2.00  | 散步    | 从不吸烟 |
| 154.00 | 46.00 | 81.00  | 19.40 | 每天    | 60.00 | 2.00  | 散步    | 从不吸烟 |
| 149.00 | 65.00 | 86.00  | 29.28 | 每天    | 60.00 | 4.00  | 散步    | 从不吸烟 |
| 163.00 | 68.00 | 91.00  | 25.59 | 每天    | 30.00 | 1.00  | 散步    | 从不吸烟 |
| 141.00 | 38.00 | 78.00  | 19.11 | 每天    | 30.00 | 10.00 | 散步    | 从不吸烟 |
| 152.00 | 51.00 | 80.00  | 22.07 | 不锻炼   |       |       |       | 从不吸烟 |
| 144.00 | 72.50 | 100.00 | 34.96 | 每天    | 60.00 | 3.00  | 散步    | 从不吸烟 |
| 150.00 | 50.00 | 75.00  | 22.22 | 每天    | 30.00 | 13.00 | 散步    | 从不吸烟 |
| 155.00 | 68.00 | 86.00  | 28.30 | 每天    | 30.00 | 2.00  | 散步    | 从不吸烟 |
| 152.00 | 51.50 | 82.00  | 22.29 | 每天    | 30.00 | 7.00  | 做操    | 从不吸烟 |
| 147.00 | 59.00 | 80.00  | 27.30 | 不锻炼   |       |       |       | 从不吸烟 |

|        |       |        |       |       |       |       |     |      |
|--------|-------|--------|-------|-------|-------|-------|-----|------|
| 150.00 | 53.00 | 85.00  | 23.56 | 每天    | 30.00 | 1.00  | 散步  | 从不吸烟 |
| 159.00 | 72.00 | 94.00  | 28.48 | 每天    | 60.00 | 2.00  | 跳舞  | 从不吸烟 |
| 147.00 | 65.00 | 92.00  | 30.08 | 不锻炼   |       |       |     | 从不吸烟 |
| 152.50 | 72.00 | 90.00  | 30.96 | 每天    | 60.00 | 8.00  | 跳舞  | 从不吸烟 |
| 160.00 | 64.00 | 87.00  | 25.00 | 不锻炼   |       |       |     | 从不吸烟 |
| 159.00 | 55.00 | 90.00  | 21.76 | 每天    | 30.00 | 6.00  | 散步  | 从不吸烟 |
| 163.00 | 71.20 | 96.00  | 26.80 | 每天    | 30.00 | 8.00  | 散步  | 从不吸烟 |
| 155.00 | 59.00 | 86.00  | 24.56 | 不锻炼   |       |       |     | 从不吸烟 |
| 166.00 | 73.00 | 95.00  | 26.49 | 每周一次↓ | 30.00 | 1.00  | 散步  | 从不吸烟 |
| 163.00 | 58.00 | 79.00  | 21.83 | 每天    | 60.00 | 17.00 | 散步  | 从不吸烟 |
| 157.00 | 70.00 | 105.00 | 28.40 | 每周一次↓ | 30.00 | 5.00  | 散步  | 从不吸烟 |
| 161.00 | 52.00 | 81.00  | 20.06 | 每天    | 60.00 | 1.00  | 散步  | 从不吸烟 |
| 150.00 | 46.00 | 90.00  | 20.44 | 每天    | 45.00 | 1.00  | 散步  | 从不吸烟 |
| 154.50 | 37.30 | 63.00  | 15.63 | 不锻炼   |       |       |     | 从不吸烟 |
| 154.00 | 56.00 | 84.00  | 23.61 | 每天    | 60.00 | 16.00 | 散步  | 从不吸烟 |
| 155.50 | 68.90 | 90.00  | 28.49 | 不锻炼   |       |       |     | 从不吸烟 |
| 151.00 | 59.50 | 85.00  | 26.10 | 不锻炼   |       |       |     | 从不吸烟 |
| 140.00 | 47.00 | 75.00  | 23.98 | 不锻炼   |       |       |     | 从不吸烟 |
| 153.00 | 64.00 | 90.00  | 27.34 | 每天    | 30.00 | 10.00 | 散步  | 从不吸烟 |
| 146.00 | 51.50 | 83.00  | 24.16 | 每周一次↓ | 30.00 | 12.00 | 散步  | 从不吸烟 |
| 155.00 | 55.00 | 85.00  | 22.89 | 每周一次↓ | 30.00 | 3.00  | 做操  | 从不吸烟 |
| 150.00 | 47.50 | 72.00  | 21.11 | 每天    | 60.00 | 6.00  | 散步  | 从不吸烟 |
| 161.00 | 66.00 | 92.00  | 25.46 | 每天    | 30.00 | 10.00 | 散步  | 从不吸烟 |
| 154.00 | 51.00 | 69.00  | 21.50 | 每天    | 60.00 | 2.00  | 散步  | 从不吸烟 |
| 153.00 | 56.00 | 85.00  | 23.92 | 不锻炼   |       |       |     | 从不吸烟 |
| 150.50 | 49.00 | 79.00  | 21.63 | 每周一次↓ | 30.00 | 5.00  | 散步  | 从不吸烟 |
| 156.00 | 60.00 | 87.00  | 24.65 | 每天    | 30.00 | 3.00  | 散步  | 从不吸烟 |
| 161.00 | 55.00 | 95.00  | 21.22 | 每天    | 30.00 | 4.00  | 散步  | 从不吸烟 |
| 155.00 | 62.60 | 87.00  | 26.06 | 每天    | 60.00 | 12.00 | 跳舞  | 从不吸烟 |
| 165.00 | 69.00 | 82.00  | 25.34 | 每周一次↓ | 30.00 | 1.00  | 散步  | 从不吸烟 |
| 147.50 | 55.00 | 80.00  | 25.28 | 每天    | 60.00 | 4.00  | 散步  | 从不吸烟 |
| 156.00 | 54.00 | 78.00  | 22.19 | 每天    | 30.00 | 10.00 | 散步  | 从不吸烟 |
| 148.00 | 61.00 | 97.00  | 27.85 | 每天    | 60.00 | 1.00  | 散步  | 从不吸烟 |
| 157.00 | 65.50 | 96.00  | 26.57 | 每天    | 30.00 | 15.00 | 散步  | 从不吸烟 |
| 148.50 | 62.60 | 96.00  | 28.39 | 每周一次↓ | 30.00 | 5.00  | 散步  | 从不吸烟 |
| 151.50 | 53.60 | 83.00  | 23.35 | 每天    | 30.00 | 6.00  | 散步  | 从不吸烟 |
| 150.00 | 40.50 | 66.00  | 18.00 | 每天    | 30.00 | 2.00  | 散步  | 从不吸烟 |
| 146.00 | 44.00 | 84.00  | 20.64 | 每天    | 30.00 | 1.00  | 散步  | 从不吸烟 |
| 145.00 | 60.60 | 88.00  | 28.82 | 每天    | 30.00 | 10.00 | 散步  | 从不吸烟 |
| 147.00 | 52.00 | 86.00  | 24.06 | 不锻炼   |       |       |     | 从不吸烟 |
| 151.00 | 55.00 | 87.00  | 24.12 | 每天    | 30.00 | 4.00  | 散步  | 从不吸烟 |
| 151.50 | 69.00 | 94.00  | 30.06 | 每天    | 30.00 | 4.00  | 散步  | 从不吸烟 |
| 155.50 | 63.00 | 96.00  | 26.05 | 每天    | 60.00 | 10.00 | 散步  | 从不吸烟 |
| 149.50 | 44.30 | 88.00  | 19.82 | 每天    | 30.00 | 6.00  | 散步  | 从不吸烟 |
| 161.50 | 70.00 | 94.00  | 26.84 | 每天    | 30.00 | 5.00  | 散步  | 从不吸烟 |
| 149.00 | 49.00 | 79.00  | 22.07 | 不锻炼   |       |       |     | 从不吸烟 |
| 146.00 | 56.00 | 94.00  | 26.27 | 每天    | 30.00 | 5.00  | 散步  | 从不吸烟 |
| 152.00 | 47.30 | 85.00  | 20.47 | 每天    | 60.00 | 12.00 | 打太极 | 从不吸烟 |
| 151.00 | 63.00 | 90.00  | 27.63 | 每天    | 60.00 | 16.00 | 散步  | 从不吸烟 |
| 152.00 | 57.40 | 86.00  | 24.84 | 每天    | 10.00 |       | 散步  | 从不吸烟 |
| 162.00 | 64.00 | 91.00  | 24.39 | 每天    | 60.00 | 6.00  | 散步  | 从不吸烟 |

|        |       |        |       |       |       |       |       |      |
|--------|-------|--------|-------|-------|-------|-------|-------|------|
| 148.00 | 46.00 | 82.00  | 21.00 | 每天    | 60.00 | 10.00 | 散步    | 从不吸烟 |
| 148.00 | 64.10 | 87.00  | 29.26 | 每天    | 60.00 | 11.00 | 散步    | 从不吸烟 |
| 150.00 | 49.70 | 87.00  | 22.09 | 不锻炼   |       |       |       | 从不吸烟 |
| 152.00 | 67.00 | 93.00  | 29.00 | 每天    | 60.00 | 11.00 | 散步    | 从不吸烟 |
| 153.50 | 61.00 | 82.00  | 25.89 | 每天    | 30.00 | 6.00  | 散步    | 从不吸烟 |
| 152.00 | 42.00 | 79.00  | 18.18 | 每天    | 60.00 | 2.00  | 散步    | 从不吸烟 |
| 154.00 | 66.00 | 96.00  | 27.83 | 每天    | 60.00 | 5.00  | 散步、跳舞 | 从不吸烟 |
| 143.00 | 58.00 | 101.00 | 28.36 | 不锻炼   |       |       |       | 从不吸烟 |
| 159.00 | 70.00 | 90.00  | 27.69 | 每周一次↓ | 30.00 | 1.00  | 散步    | 从不吸烟 |
| 155.00 | 62.90 | 90.00  | 26.18 | 不锻炼   |       |       |       | 从不吸烟 |
| 144.00 | 40.90 | 69.00  | 19.72 | 每天    | 30.00 | 11.00 | 骑自行车  | 从不吸烟 |
| 154.50 | 52.00 | 74.00  | 21.78 | 每天    | 60.00 | 4.00  | 散步    | 从不吸烟 |
| 149.50 | 45.60 | 73.00  | 20.40 | 每天    | 30.00 | 10.00 | 打太极   | 从不吸烟 |
| 151.00 | 61.00 | 90.00  | 26.75 | 每天    | 30.00 | 3.00  | 散步    | 从不吸烟 |
| 163.00 | 76.00 | 95.00  | 28.60 | 每天    | 60.00 | 10.00 | 跳舞    | 从不吸烟 |
| 150.00 | 54.00 | 64.00  | 24.00 | 不锻炼   |       |       |       | 从不吸烟 |
| 144.00 | 42.00 | 63.00  | 20.25 | 每天    | 30.00 | 2.00  | 散步    | 从不吸烟 |
| 154.00 | 70.00 | 92.00  | 29.52 | 不锻炼   |       |       |       | 从不吸烟 |
| 156.00 | 48.00 | 73.00  | 19.72 | 每天    | 30.00 | 1.00  | 散步    | 从不吸烟 |
| 146.00 | 56.00 | 97.00  | 26.27 | 每周一次↓ | 30.00 | 1.00  | 散步    | 从不吸烟 |
| 143.00 | 59.00 | 91.00  | 28.85 | 不锻炼   |       |       |       | 从不吸烟 |
| 147.00 | 60.00 | 91.00  | 27.77 | 每天    | 30.00 | 2.00  | 散步    | 从不吸烟 |
| 156.00 | 53.00 | 75.00  | 21.78 | 每天    | 30.00 | 8.00  | 散步    | 从不吸烟 |
| 145.00 | 61.00 | 100.00 | 29.01 | 每天    | 30.00 | 2.00  | 散步    | 从不吸烟 |
| 151.50 | 51.00 | 78.00  | 22.22 | 每天    | 60.00 | 15.00 | 散步    | 从不吸烟 |
| 155.50 | 66.30 | 90.00  | 27.42 | 每天    | 30.00 | 8.00  | 散步    | 从不吸烟 |
| 151.00 | 68.00 | 97.00  | 29.82 | 每周一次↓ | 30.00 | 1.00  | 散步    | 从不吸烟 |
| 143.00 | 69.70 | 104.00 | 34.08 | 每天    | 30.00 | 1.00  | 散步    | 从不吸烟 |
| 143.00 | 35.00 | 72.00  | 17.12 | 每天    | 60.00 | 20.00 | 散步    | 从不吸烟 |
| 148.00 | 42.00 | 81.00  | 19.17 | 每天    | 60.00 | 1.00  | 散步    | 从不吸烟 |
| 145.00 | 53.00 | 84.00  | 25.21 | 每周一次↓ | 30.00 | 1.00  | 散步    | 从不吸烟 |
| 145.00 | 39.50 | 70.00  | 18.79 | 每天    | 60.00 | 7.00  | 散步    | 从不吸烟 |
| 150.00 | 66.00 | 96.00  | 29.33 | 每天    | 30.00 | 4.00  | 散步    | 从不吸烟 |
| 144.00 | 47.50 | 79.00  | 22.91 | 每天    | 60.00 | 12.00 | 散步    | 从不吸烟 |
| 154.00 | 57.50 | 73.00  | 24.25 | 每天    | 20.00 | 2.00  | 散步    | 从不吸烟 |
| 156.00 | 53.00 | 81.00  | 21.78 | 每周一次↓ | 30.00 | 2.00  | 散步    | 从不吸烟 |
| 155.00 | 61.00 | 87.00  | 25.39 | 每天    | 60.00 | 5.00  | 散步    | 从不吸烟 |
| 156.00 | 59.00 | 85.00  | 24.24 | 每天    | 30.00 | 1.00  | 散步    | 从不吸烟 |
| 146.00 | 54.00 | 84.00  | 25.33 | 每天    | 30.00 | 10.00 | 散步    | 从不吸烟 |
| 149.00 | 61.00 | 84.00  | 27.48 | 每天    | 45.00 | 2.00  | 散步    | 从不吸烟 |
| 150.50 | 62.00 | 89.00  | 27.37 | 不锻炼   |       |       |       | 从不吸烟 |
| 146.00 | 51.00 | 82.00  | 23.93 | 每天    | 60.00 | 12.00 | 散步    | 从不吸烟 |
| 150.00 | 53.00 | 79.00  | 23.56 | 不锻炼   |       |       |       | 从不吸烟 |
| 146.00 | 50.00 | 84.00  | 23.46 | 每天    | 30.00 | 6.00  | 散步    | 从不吸烟 |
| 158.00 | 71.50 | 96.00  | 28.64 | 每天    | 60.00 | 8.00  | 散步    | 从不吸烟 |
| 157.00 | 57.00 | 92.00  | 23.12 | 每天    | 30.00 | 7.00  | 散步    | 从不吸烟 |
| 160.00 | 83.70 | 111.00 | 32.70 | 每天    | 60.00 | 10.00 | 散步    | 从不吸烟 |
| 148.00 | 52.00 | 86.00  | 23.74 | 每天    | 30.00 | 3.00  | 散步    | 从不吸烟 |
| 153.50 | 46.00 | 75.00  | 19.52 | 每天    | 30.00 | 3.00  | 散步    | 从不吸烟 |
| 150.00 | 54.00 | 85.00  | 24.00 | 每天    | 30.00 | 4.00  | 散步    | 从不吸烟 |
| 158.00 | 48.00 | 77.00  | 19.23 | 不锻炼   |       |       |       | 从不吸烟 |

|        |       |        |       |       |       |       |      |      |
|--------|-------|--------|-------|-------|-------|-------|------|------|
| 146.00 | 57.00 | 89.00  | 26.74 | 不锻炼   |       |       |      | 从不吸烟 |
| 151.00 | 55.00 | 85.00  | 24.12 | 每天    | 30.00 | 3.00  | 散步   | 从不吸烟 |
| 153.00 | 60.00 | 87.00  | 25.63 | 不锻炼   |       |       |      | 从不吸烟 |
| 152.00 | 67.00 | 96.00  | 29.00 | 每天    | 60.00 | 11.00 | 散步   | 从不吸烟 |
| 154.00 | 60.00 | 87.00  | 25.30 | 每周一次↓ | 30.00 | 1.00  | 散步   | 从不吸烟 |
| 157.00 | 71.00 | 102.00 | 28.80 | 每天    | 30.00 | 1.00  | 散步   | 从不吸烟 |
| 160.00 | 60.20 | 86.00  | 23.52 | 每天    | 60.00 | 4.00  | 散步   | 从不吸烟 |
| 139.00 | 50.00 | 86.00  | 25.88 | 每天    | 60.00 | 6.00  | 散步   | 从不吸烟 |
| 154.00 | 62.00 | 94.00  | 26.14 | 每天    | 30.00 | 5.00  | 散步   | 从不吸烟 |
| 143.00 | 55.90 | 92.00  | 27.34 | 每天    | 30.00 | 10.00 | 散步   | 从不吸烟 |
| 153.50 | 64.10 | 99.00  | 27.20 | 每天    | 30.00 | 3.00  | 散步   | 从不吸烟 |
| 151.00 | 50.00 | 80.00  | 21.93 | 每天    | 30.00 | 2.00  | 散步   | 从不吸烟 |
| 152.00 | 50.00 | 78.00  | 21.64 | 每周一次↓ | 30.00 | 1.00  | 散步   | 从不吸烟 |
| 151.00 | 59.80 | 91.00  | 26.23 | 每天    | 60.00 | 12.00 | 散步、打 | 从不吸烟 |
| 150.00 | 61.00 | 84.00  | 27.11 | 每天    | 60.00 | 1.00  | 散步   | 从不吸烟 |
| 151.00 | 56.40 | 87.00  | 24.74 | 不锻炼   |       |       |      | 从不吸烟 |
| 149.50 | 66.00 | 99.00  | 29.53 | 每天    | 30.00 | 13.00 | 散步   | 从不吸烟 |
| 152.00 | 43.00 | 76.00  | 18.61 | 每天    | 30.00 | 1.00  | 散步   | 从不吸烟 |
| 161.00 | 62.75 | 84.00  | 24.21 | 每周一次↓ | 20.00 | 5.00  | 散步   | 从不吸烟 |
| 149.00 | 63.50 | 100.00 | 28.60 | 每天    | 30.00 | 4.00  | 散步   | 从不吸烟 |
| 153.00 | 63.00 | 86.00  | 26.91 | 每天    | 30.00 | 1.00  | 散步   | 从不吸烟 |
| 154.50 | 50.00 | 85.00  | 20.95 | 不锻炼   |       |       |      | 从不吸烟 |
| 152.00 | 52.50 | 86.00  | 22.72 | 每天    | 30.00 | 6.00  | 散步   | 从不吸烟 |
| 141.00 | 42.00 | 70.00  | 21.13 | 不锻炼   |       |       |      | 从不吸烟 |
| 155.00 | 69.00 | 92.00  | 28.72 | 不锻炼   |       |       |      | 从不吸烟 |
| 151.50 | 52.00 | 79.00  | 22.66 | 每天    | 30.00 | 2.00  | 散步   | 从不吸烟 |
| 148.00 | 64.80 | 100.00 | 29.58 | 不锻炼   |       |       |      | 从不吸烟 |
| 149.00 | 37.50 | 67.00  | 16.89 | 每天    | 20.00 | 1.00  | 散步   | 吸烟   |
| 149.00 | 65.00 | 95.00  | 29.28 | 不锻炼   |       |       |      | 从不吸烟 |
| 150.00 | 40.00 | 65.00  | 17.78 | 不锻炼   |       |       |      | 从不吸烟 |
| 150.00 | 57.00 | 87.00  | 25.33 | 不锻炼   |       |       |      | 从不吸烟 |
| 134.00 | 42.00 | 88.00  | 23.39 | 偶尔    | 20.00 | 2.00  | 散步   | 从不吸烟 |
| 151.00 | 51.00 | 81.00  | 22.37 | 每天    | 90.00 | 3.00  | 散步   | 从不吸烟 |
| 163.00 | 68.00 | 96.00  | 25.59 | 不锻炼   |       |       |      | 从不吸烟 |
| 158.00 | 69.00 | 97.00  | 27.64 | 不锻炼   |       |       |      | 从不吸烟 |
| 147.50 | 57.00 | 91.00  | 26.20 | 每天    | 30.00 | 5.00  | 散步   | 从不吸烟 |
| 143.00 | 59.00 | 90.00  | 28.85 | 每天    | 60.00 | 7.00  | 散步   | 从不吸烟 |
| 145.00 | 50.00 | 81.00  | 23.78 | 不锻炼   |       |       |      | 从不吸烟 |
| 147.00 | 63.00 | 88.00  | 29.15 | 每天    | 60.00 | 10.00 | 散步   | 从不吸烟 |
| 152.00 | 59.00 | 89.00  | 25.54 | 不锻炼   |       |       |      | 从不吸烟 |
| 155.00 | 64.00 | 95.00  | 26.64 | 每天    | 30.00 | 1.00  | 散步   | 从不吸烟 |
| 150.50 | 53.50 | 79.00  | 23.62 | 每天    | 60.00 | 1.00  | 散步   | 从不吸烟 |
| 153.50 | 95.00 | 116.00 | 40.32 | 不锻炼   |       |       |      | 从不吸烟 |
| 150.00 | 62.00 | 86.00  | 27.56 | 每天    | 30.00 | 3.00  | 散步   | 从不吸烟 |
| 154.00 | 52.00 | 86.00  | 21.93 | 不锻炼   |       |       |      | 从不吸烟 |
| 151.00 | 51.00 | 81.00  | 22.37 | 每天    | 30.00 | 5.00  | 散步   | 从不吸烟 |
| 151.00 | 56.30 | 88.00  | 24.69 | 每天    | 30.00 | 5.00  | 散步   | 从不吸烟 |
| 145.00 | 64.80 | 98.00  | 30.82 | 不锻炼   |       |       |      | 从不吸烟 |
| 144.00 | 42.00 | 70.00  | 20.25 | 每天    | 30.00 | 15.00 | 散步   | 从不吸烟 |
| 152.00 | 59.00 | 95.00  | 25.54 | 每天    | 30.00 | 1.00  | 散步   | 从不吸烟 |
| 144.00 | 43.80 | 80.00  | 21.12 | 每天    | 30.00 | 2.00  | 散步   | 从不吸烟 |

|        |       |        |       |       |       |       |        |      |
|--------|-------|--------|-------|-------|-------|-------|--------|------|
| 153.00 | 62.00 | 94.00  | 26.49 | 不锻炼   |       |       |        | 从不吸烟 |
| 152.00 | 65.00 | 94.00  | 28.13 | 每天    | 45.00 | 3.00  | 散步     | 从不吸烟 |
| 158.00 | 64.00 | 90.00  | 25.64 | 每天    | 30.00 |       | 散步     | 从不吸烟 |
| 153.00 | 62.00 | 90.00  | 26.49 | 每天    | 60.00 | 7.00  | 散步     | 从不吸烟 |
| 164.50 | 76.60 | 97.00  | 28.31 | 每天    | 60.00 | 8.00  | 散步, 跳舞 | 从不吸烟 |
| 160.00 | 68.00 | 90.00  | 26.56 | 每天    | 30.00 | 3.00  | 散步     | 从不吸烟 |
| 160.00 | 73.00 | 97.00  | 28.52 | 不锻炼   |       |       |        | 从不吸烟 |
| 147.00 | 60.00 | 96.00  | 27.77 | 每天    | 30.00 | 3.00  | 散步     | 从不吸烟 |
| 138.00 | 31.40 | 74.00  | 16.49 | 每天    | 15.00 | 7.00  | 散步     | 从不吸烟 |
| 148.00 | 35.00 | 56.00  | 15.98 | 不锻炼   |       |       |        | 从不吸烟 |
| 152.00 | 50.00 | 73.00  | 21.64 | 每天    | 60.00 | 5.00  | 散步     | 从不吸烟 |
| 146.00 | 48.00 | 86.00  | 22.52 | 不锻炼   |       |       |        | 从不吸烟 |
| 145.00 | 41.50 | 69.00  | 19.74 | 每天    | 30.00 | 2.00  | 散步     | 从不吸烟 |
| 160.00 | 80.00 | 104.00 | 31.25 | 每天    | 80.00 | 7.00  | 跳舞     | 从不吸烟 |
| 148.00 | 49.00 | 80.00  | 22.37 | 每天    | 60.00 | 7.00  | 打太极    | 从不吸烟 |
| 152.00 | 60.00 | 86.00  | 25.97 | 每周一次↓ | 30.00 | 1.00  | 散步     | 从不吸烟 |
| 143.00 | 61.00 | 95.00  | 29.83 | 每周一次↓ | 30.00 | 1.00  | 散步     | 从不吸烟 |
| 140.00 | 40.00 | 81.00  | 20.41 | 不锻炼   |       |       |        | 从不吸烟 |
| 151.00 | 57.00 | 87.00  | 25.00 | 每天    | 60.00 | 1.00  | 散步     | 从不吸烟 |
| 156.00 | 65.00 | 92.00  | 26.71 | 不锻炼   |       |       |        | 从不吸烟 |
| 160.00 | 84.00 | 100.00 | 32.81 | 每周一次↓ | 30.00 | 3.00  | 散步     | 从不吸烟 |
| 152.00 | 55.00 | 88.00  | 23.81 | 每天    | 30.00 | 3.00  | 散步     | 从不吸烟 |
| 146.00 | 61.00 | 94.00  | 28.62 | 不锻炼   |       |       |        | 从不吸烟 |
| 154.00 | 66.00 | 94.00  | 27.83 | 每天    | 60.00 | 11.00 | 散步     | 从不吸烟 |
| 145.00 | 46.00 | 75.00  | 21.88 | 不锻炼   |       |       |        | 从不吸烟 |
| 158.00 | 52.00 | 85.00  | 20.83 | 每天    | 60.00 | 11.00 | 散步     | 从不吸烟 |
| 158.00 | 55.00 | 82.00  | 22.03 | 每天    | 60.00 | 2.00  | 散步     | 从不吸烟 |
| 159.00 | 70.00 | 94.00  | 27.69 | 每天    | 30.00 | 1.00  | 散步     | 从不吸烟 |
| 155.00 | 61.80 | 84.00  | 25.72 | 不锻炼   |       |       |        | 从不吸烟 |
| 154.00 | 59.00 | 75.00  | 24.88 | 每周一次↓ | 30.00 | 1.00  | 散步     | 从不吸烟 |
| 149.00 | 62.00 | 93.00  | 27.93 | 每周一次↓ | 30.00 | 1.00  | 散步     | 从不吸烟 |
| 145.00 | 67.60 | 93.00  | 32.15 | 每天    | 60.00 | 5.00  | 散步     | 从不吸烟 |
| 148.00 | 65.00 | 96.00  | 29.67 | 每周一次↓ | 30.00 | 1.00  | 散步     | 从不吸烟 |
| 152.00 | 40.00 | 62.00  | 17.31 | 每天    | 30.00 | 2.00  | 散步     | 从不吸烟 |
| 155.00 | 64.50 | 87.00  | 26.85 | 每天    | 60.00 | 5.00  | 散步     | 从不吸烟 |
| 143.00 | 39.00 | 69.00  | 19.07 | 每天    | 60.00 | 3.00  | 散步     | 从不吸烟 |
| 153.50 | 72.60 | 100.00 | 30.81 | 每天    | 30.00 | 4.00  | 打球     | 从不吸烟 |
| 152.00 | 61.00 | 99.00  | 26.40 | 不锻炼   |       |       |        | 从不吸烟 |
| 147.00 | 50.00 | 87.00  | 23.14 | 不锻炼   |       |       |        | 从不吸烟 |
| 150.00 | 41.50 | 70.00  | 18.44 | 每天    | 30.00 | 1.00  | 散步     | 从不吸烟 |
| 140.00 | 55.40 | 86.00  | 28.27 | 不锻炼   |       |       |        | 从不吸烟 |
| 153.00 | 45.00 | 62.00  | 19.22 | 每天    | 60.00 | 1.00  | 散步     | 从不吸烟 |
| 145.00 | 59.00 | 85.00  | 28.06 | 每天    | 60.00 | 12.00 | 散步     | 从不吸烟 |
| 155.00 | 54.00 | 82.00  | 22.48 | 每天    | 30.00 | 5.00  | 散步     | 从不吸烟 |
| 152.50 | 57.40 | 82.00  | 24.68 | 每天    | 30.00 | 2.00  | 散步     | 从不吸烟 |
| 151.00 | 55.00 | 90.00  | 24.12 | 每天    | 60.00 | 3.00  | 散步     | 从不吸烟 |
| 153.00 | 59.00 | 86.00  | 25.20 | 不锻炼   |       |       |        | 从不吸烟 |
| 154.00 | 61.00 | 91.00  | 25.72 | 每天    | 30.00 | 1.00  | 散步     | 从不吸烟 |
| 156.00 | 73.00 | 97.00  | 30.00 | 不锻炼   |       |       |        | 从不吸烟 |
| 155.00 | 62.00 | 80.00  | 25.81 | 不锻炼   |       |       |        | 从不吸烟 |
| 152.00 | 55.00 | 87.00  | 23.81 | 每天    | 60.00 | 2.00  | 散步     | 从不吸烟 |

|        |       |       |       |       |       |       |      |      |
|--------|-------|-------|-------|-------|-------|-------|------|------|
| 146.50 | 45.50 | 84.00 | 21.20 | 每天    | 30.00 | 2.00  | 散步   | 从不吸烟 |
| 143.00 | 46.00 | 77.00 | 22.49 | 每天    | 60.00 | 11.00 | 散步   | 从不吸烟 |
| 152.00 | 42.00 | 70.00 | 18.18 | 每天    | 30.00 | 3.00  | 散步   | 从不吸烟 |
| 161.00 | 61.40 | 89.00 | 23.69 | 每天    | 60.00 | 10.00 | 散步   | 从不吸烟 |
| 140.00 | 49.40 | 84.00 | 25.20 | 每天    | 30.00 | 1.00  | 散步   | 从不吸烟 |
| 148.00 | 55.00 | 87.00 | 25.11 | 每天    | 30.00 | 6.00  | 散步   | 从不吸烟 |
| 152.00 | 60.00 | 93.00 | 25.97 | 每天    | 30.00 | 1.00  | 散步   | 从不吸烟 |
| 136.00 | 36.00 | 80.00 | 19.46 | 每天    | 60.00 | 2.00  | 散步   | 从不吸烟 |
| 151.00 | 45.50 | 81.00 | 19.96 | 每天    | 30.00 | 2.00  | 散步、踩 | 从不吸烟 |
| 168.00 | 72.00 | 98.00 | 25.51 | 不锻炼   |       |       |      | 从不吸烟 |
| 158.00 | 61.40 | 89.00 | 24.60 | 每天    | 60.00 | 12.00 | 打太极  | 从不吸烟 |
| 153.00 | 60.00 | 85.00 | 25.63 | 不锻炼   |       |       |      | 从不吸烟 |
| 151.00 | 39.50 | 73.00 | 17.32 | 不锻炼   |       |       |      | 从不吸烟 |
| 156.00 | 68.00 | 99.00 | 27.94 | 不锻炼   |       |       |      | 从不吸烟 |
| 146.00 | 61.00 | 91.00 | 28.62 | 每天    | 60.00 | 16.00 | 散步   | 从不吸烟 |
| 149.00 | 51.00 | 90.50 | 22.97 | 每天    | 20.00 | 1.00  | 散步   | 从不吸烟 |
| 156.00 | 37.70 | 55.00 | 15.49 | 每天    | 30.00 | 2.00  | 散步   | 从不吸烟 |
| 152.00 | 69.00 | 99.00 | 29.86 | 每天    | 20.00 | 3.00  | 散步   | 从不吸烟 |
| 160.00 | 52.50 | 89.00 | 20.51 | 每天    | 30.00 | 12.00 | 散步   | 从不吸烟 |
| 154.00 | 68.00 | 96.00 | 28.67 | 每天    | 60.00 | 3.00  | 散步   | 从不吸烟 |
| 149.00 | 58.00 | 84.00 | 26.12 | 不锻炼   |       |       |      | 从不吸烟 |
| 158.00 | 56.00 | 85.00 | 22.43 | 每天    | 60.00 | 4.00  | 散步   | 从不吸烟 |
| 146.00 | 57.00 | 88.00 | 26.74 | 不锻炼   |       |       |      | 从不吸烟 |
| 137.00 | 40.00 | 75.00 | 21.31 | 不锻炼   |       |       |      | 从不吸烟 |
| 145.00 | 55.60 | 97.00 | 26.44 | 不锻炼   |       |       |      | 从不吸烟 |
| 152.00 | 41.50 | 69.00 | 17.96 | 每天    | 30.00 | 2.00  | 散步   | 从不吸烟 |
| 149.00 | 62.00 | 92.00 | 27.93 | 每天    | 30.00 | 3.00  | 散步   | 从不吸烟 |
| 157.00 | 56.00 | 81.00 | 22.72 | 每天    | 30.00 | 4.00  | 散步   | 从不吸烟 |
| 156.00 | 69.00 | 92.00 | 28.35 | 每周一次! | 20.00 | 2.00  | 散步   | 从不吸烟 |
| 149.00 | 55.00 | 86.00 | 24.77 | 偶尔    | 30.00 | 1.00  | 散步   | 从不吸烟 |
| 151.50 | 56.60 | 78.00 | 24.66 | 每天    | 30.00 | 1.00  | 散步   | 从不吸烟 |
| 148.00 | 50.00 | 85.00 | 22.83 | 每天    | 30.00 | 3.00  | 散步   | 从不吸烟 |
| 156.50 | 60.00 | 87.00 | 24.50 | 每天    | 60.00 | 8.00  | 散步   | 从不吸烟 |
| 167.00 | 60.00 | 88.00 | 21.51 | 每天    | 30.00 | 10.00 | 散步   | 从不吸烟 |
| 152.00 | 55.00 | 83.00 | 23.81 | 每天    | 30.00 | 1.00  | 散步   | 从不吸烟 |
| 149.00 | 63.50 | 88.00 | 28.60 | 每天    | 30.00 | 2.00  | 散步   | 从不吸烟 |
| 145.00 | 53.00 | 76.00 | 25.21 | 每天    | 30.00 | 10.00 | 散步   | 从不吸烟 |
| 151.00 | 68.00 | 93.00 | 29.82 | 每天    | 30.00 | 6.00  | 散步   | 从不吸烟 |
| 158.00 | 84.00 | 97.00 | 33.65 | 每天    | 60.00 | 7.00  | 散步   | 从不吸烟 |
| 150.00 | 65.30 | 95.00 | 29.02 | 每天    | 30.00 | 2.00  | 散步   | 从不吸烟 |
| 153.00 | 68.60 | 96.00 | 29.30 | 每天    | 30.00 | 1.00  | 散步   | 从不吸烟 |
| 145.00 | 36.00 | 71.00 | 17.12 | 不锻炼   |       |       |      | 从不吸烟 |
| 154.00 | 54.00 | 84.00 | 22.77 | 每天    | 30.00 | 1.00  | 散步   | 从不吸烟 |
| 151.00 | 64.00 | 93.00 | 28.07 | 每天    | 60.00 | 5.00  | 散步   | 从不吸烟 |
| 148.50 | 44.00 | 67.00 | 19.95 | 不锻炼   |       |       |      | 从不吸烟 |
| 152.00 | 50.00 | 82.00 | 21.64 | 每天    | 30.00 | 7.00  | 散步   | 从不吸烟 |
| 153.00 | 53.00 | 73.00 | 22.64 | 每天    | 30.00 | 3.00  | 散步   | 从不吸烟 |
| 153.00 | 63.00 | 89.00 | 26.91 | 每天    | 60.00 | 4.00  | 散步   | 从不吸烟 |
| 146.00 | 58.30 | 96.00 | 27.35 | 每天    | 60.00 | 8.00  | 散步   | 从不吸烟 |
| 146.00 | 53.00 | 83.00 | 24.86 | 每天    | 30.00 | 7.00  | 散步   | 从不吸烟 |
| 151.00 | 63.00 | 90.00 | 27.63 | 每天    | 30.00 | 16.00 | 散步   | 从不吸烟 |

|        |       |       |       |       |       |       |       |      |
|--------|-------|-------|-------|-------|-------|-------|-------|------|
| 140.00 | 45.00 | 80.00 | 22.96 | 偶尔    | 10.00 | 1.00  | 散步    | 从不吸烟 |
| 144.00 | 56.00 | 90.00 | 27.01 | 每天    | 30.00 | 5.00  | 散步    | 从不吸烟 |
| 146.00 | 53.00 | 94.00 | 24.86 | 不锻炼   |       |       |       | 从不吸烟 |
| 147.00 | 38.00 | 72.00 | 17.59 | 不锻炼   |       |       |       | 从不吸烟 |
| 150.00 | 55.80 | 86.00 | 24.80 | 每天    | 30.00 | 3.00  | 散步    | 从不吸烟 |
| 155.00 | 59.50 | 93.00 | 24.77 | 每天    | 30.00 | 2.00  | 散步    | 从不吸烟 |
| 161.00 | 55.00 | 80.00 | 21.22 | 每周一次↓ | 30.00 | 1.00  | 散步    | 从不吸烟 |
| 153.00 | 52.00 | 88.00 | 22.21 | 每天    | 60.00 | 6.00  | 散步    | 从不吸烟 |
| 145.50 | 44.60 | 87.50 | 21.07 | 每天    | 30.00 | 6.00  | 散步    | 从不吸烟 |
| 150.00 | 49.00 | 80.00 | 21.78 | 每天    | 30.00 | 1.00  | 散步    | 从不吸烟 |
| 150.00 | 43.00 | 69.00 | 19.11 | 每天    | 60.00 | 1.00  | 散步    | 从不吸烟 |
| 148.00 | 55.00 | 87.00 | 25.11 | 每天    | 60.00 | 3.00  | 散步    | 从不吸烟 |
| 148.00 | 63.80 | 91.00 | 29.13 | 每天    | 60.00 | 1.00  | 体操    | 从不吸烟 |
| 152.00 | 45.60 | 74.00 | 19.74 | 不锻炼   |       |       |       | 从不吸烟 |
| 151.00 | 38.00 | 62.00 | 16.67 | 不锻炼   |       |       |       | 从不吸烟 |
| 152.00 | 67.00 | 88.00 | 29.00 | 每天    | 30.00 | 18.00 | 散步    | 从不吸烟 |
| 156.00 | 61.00 | 87.00 | 25.07 | 不锻炼   |       |       |       | 从不吸烟 |
| 151.00 | 56.00 | 86.00 | 24.56 | 每天    | 30.00 | 6.00  | 散步    | 从不吸烟 |
| 152.00 | 53.30 | 81.00 | 23.07 | 不锻炼   |       |       |       | 从不吸烟 |
| 149.00 | 61.00 | 92.00 | 27.48 | 每天    | 30.00 | 7.00  | 散步    | 从不吸烟 |
| 148.00 | 36.60 | 64.00 | 16.71 | 每天    | 30.00 | 4.00  | 散步    | 从不吸烟 |
| 155.00 | 59.20 | 85.00 | 24.64 | 每天    | 60.00 | 7.00  | 散步    | 从不吸烟 |
| 159.00 | 53.00 | 84.00 | 20.96 | 每天    | 60.00 | 4.00  | 散步、骑马 | 从不吸烟 |
| 155.00 | 60.00 | 85.00 | 24.97 | 每天    | 30.00 | 10.00 | 散步    | 从不吸烟 |
| 157.00 | 42.00 | 65.00 | 17.04 | 每周一次↓ | 30.00 | 2.00  | 散步    | 从不吸烟 |
| 153.00 | 51.00 | 78.00 | 21.79 | 每周一次↓ | 30.00 | 1.00  | 散步    | 从不吸烟 |
| 145.00 | 45.00 | 78.00 | 21.40 | 每天    | 30.00 | 6.00  | 散步    | 从不吸烟 |
| 155.00 | 54.00 | 87.00 | 22.48 | 每天    | 15.00 | 1.00  | 散步    | 从不吸烟 |
| 151.00 | 59.00 | 86.00 | 25.88 | 不锻炼   |       |       |       | 从不吸烟 |
| 145.00 | 45.00 | 75.00 | 21.40 | 每天    | 30.00 | 2.00  | 散步    | 从不吸烟 |
| 148.00 | 60.00 | 87.00 | 27.39 | 每周一次↓ | 30.00 | 1.00  | 散步    | 从不吸烟 |
| 133.00 | 29.00 | 73.00 | 16.39 | 每天    | 60.00 | 7.00  | 散步    | 从不吸烟 |
| 153.00 | 64.00 | 94.00 | 27.34 | 每天    | 30.00 | 3.00  | 散步    | 从不吸烟 |
| 146.50 | 55.00 | 83.00 | 25.63 | 每天    | 60.00 | 3.00  | 散步    | 从不吸烟 |
| 159.50 | 70.00 | 93.00 | 27.52 | 每天    | 30.00 | 3.00  | 散步    | 从不吸烟 |
| 144.00 | 52.00 | 82.00 | 25.08 | 每周一次↓ | 15.00 | 1.00  | 被动运动  | 从不吸烟 |
| 146.00 | 58.00 | 92.00 | 27.21 | 每周一次↓ | 30.00 | 2.00  | 散步    | 从不吸烟 |
| 159.00 | 61.00 | 83.00 | 24.13 | 每天    | 60.00 | 1.00  | 散步    | 从不吸烟 |
| 148.00 | 45.00 | 75.00 | 20.54 | 每天    | 30.00 | 6.00  | 散步    | 从不吸烟 |
| 150.00 | 54.00 | 88.00 | 24.00 | 每天    | 60.00 | 6.00  | 散步    | 从不吸烟 |
| 138.00 | 43.00 | 84.00 | 22.58 | 不锻炼   |       |       |       | 从不吸烟 |
| 150.00 | 49.00 | 77.00 | 21.78 | 每天    | 50.00 | 10.00 | 散步    | 从不吸烟 |
| 148.00 | 54.70 | 93.00 | 24.97 | 不锻炼   |       |       |       | 从不吸烟 |
| 150.00 | 63.00 | 96.00 | 28.00 | 每天    | 30.00 | 6.00  | 散步    | 从不吸烟 |
| 150.00 | 46.00 | 83.00 | 20.44 | 每天    | 30.00 | 2.00  | 散步    | 从不吸烟 |
| 152.00 | 62.10 | 86.00 | 26.88 | 每天    | 60.00 | 2.00  | 体操    | 从不吸烟 |
| 146.00 | 51.80 | 88.00 | 24.30 | 每天    | 60.00 | 6.00  | 散步    | 从不吸烟 |
| 150.00 | 61.00 | 90.00 | 27.11 | 不锻炼   |       |       |       | 从不吸烟 |
| 152.00 | 66.50 | 92.00 | 28.78 | 每天    | 60.00 | 4.00  | 散步    | 从不吸烟 |
| 155.50 | 57.00 | 86.00 | 23.57 | 每天    | 30.00 | 4.00  | 散步    | 从不吸烟 |
| 162.50 | 58.00 | 80.00 | 21.96 | 每天    | 60.00 | 10.00 | 散步    | 从不吸烟 |

|        |       |       |       |       |        |       |       |      |
|--------|-------|-------|-------|-------|--------|-------|-------|------|
| 155.50 | 57.30 | 88.00 | 23.70 | 每天    | 60.00  | 5.00  | 散步    | 从不吸烟 |
| 155.00 | 60.00 | 80.00 | 24.97 | 每天    | 30.00  | 6.00  | 散步    | 从不吸烟 |
| 162.00 | 58.00 | 83.00 | 22.10 | 每天    | 40.00  | 4.00  | 散步    | 从不吸烟 |
| 149.00 | 34.05 | 78.00 | 15.34 | 每天    | 10.00  | 2.00  | 散步    | 从不吸烟 |
| 152.00 | 64.00 | 91.00 | 27.70 | 每天    | 60.00  | 2.00  | 散步    | 从不吸烟 |
| 157.00 | 52.50 | 77.00 | 21.30 | 每天    | 30.00  | 2.00  | 散步    | 从不吸烟 |
| 144.00 | 41.00 | 68.00 | 19.77 | 每天    | 30.00  | 3.00  | 散步    | 从不吸烟 |
| 139.00 | 56.00 | 88.00 | 28.98 | 每天    | 30.00  | 1.00  | 散步    | 从不吸烟 |
| 144.00 | 60.00 | 90.00 | 28.94 | 每天    | 90.00  |       | 散步    | 从不吸烟 |
| 154.00 | 67.00 | 92.00 | 28.25 | 每天    | 60.00  | 2.00  | 散步、游泳 | 从不吸烟 |
| 150.00 | 57.00 | 86.00 | 25.33 | 每天    | 30.00  | 3.00  | 散步    | 从不吸烟 |
| 148.00 | 60.70 | 99.00 | 27.71 | 不锻炼   |        |       |       | 从不吸烟 |
| 143.00 | 46.00 | 78.00 | 22.49 | 不锻炼   |        |       |       | 从不吸烟 |
| 147.00 | 39.10 | 68.00 | 18.09 | 每天    | 60.00  | 2.00  | 散步    | 从不吸烟 |
| 151.00 | 49.00 | 80.00 | 21.49 | 不锻炼   |        |       |       | 从不吸烟 |
| 148.00 | 48.10 | 89.00 | 21.96 | 每天    | 15.00  | 2.00  | 散步    | 从不吸烟 |
| 152.00 | 59.00 | 92.00 | 25.54 | 每天    | 60.00  | 8.00  | 散步    | 从不吸烟 |
| 152.50 | 60.00 | 89.00 | 25.80 | 不锻炼   |        |       |       | 从不吸烟 |
| 160.00 | 60.80 | 85.00 | 23.75 | 不锻炼   |        |       |       | 从不吸烟 |
| 156.00 | 63.00 | 86.00 | 25.89 | 每天    | 20.00  | 1.00  | 散步    | 从不吸烟 |
| 146.00 | 54.50 | 89.00 | 25.57 | 不锻炼   |        |       |       | 从不吸烟 |
| 156.00 | 66.00 | 98.00 | 27.12 | 每天    | 30.00  | 2.00  | 散步    | 从不吸烟 |
| 146.50 | 49.40 | 90.50 | 23.02 | 每天    | 30.00  | 10.00 | 散步    | 从不吸烟 |
| 151.00 | 55.00 | 84.00 | 24.12 | 每天    | 30.00  | 4.00  | 散步    | 从不吸烟 |
| 153.00 | 52.00 | 78.00 | 22.21 | 每天    | 30.00  | 4.00  | 散步    | 从不吸烟 |
| 155.50 | 61.00 | 85.00 | 25.23 | 每天    | 60.00  | 4.00  | 散步    | 从不吸烟 |
| 155.00 | 60.45 | 99.00 | 25.16 | 不锻炼   |        |       |       | 从不吸烟 |
| 145.00 | 65.00 | 98.00 | 30.92 | 每天    | 120.00 | 8.00  | 散步    | 从不吸烟 |
| 153.00 | 60.00 | 85.00 | 25.63 | 每天    | 60.00  | 2.00  | 散步    | 从不吸烟 |
| 146.50 | 39.50 | 73.00 | 18.40 | 每天    | 30.00  | 4.00  | 散步    | 从不吸烟 |
| 145.00 | 45.00 | 73.00 | 21.40 | 每天    | 20.00  | 1.00  | 散步    | 从不吸烟 |
| 148.00 | 52.00 | 85.00 | 23.74 | 不锻炼   |        |       |       | 从不吸烟 |
| 152.00 | 64.00 | 86.00 | 27.70 | 不锻炼   |        |       |       | 从不吸烟 |
| 152.00 | 56.50 | 88.00 | 24.45 | 不锻炼   |        |       |       | 从不吸烟 |
| 152.00 | 54.00 | 82.00 | 23.37 | 每天    | 30.00  | 2.00  | 散步    | 从不吸烟 |
| 150.00 | 42.00 | 74.00 | 18.67 | 不锻炼   |        |       |       | 从不吸烟 |
| 148.00 | 42.00 | 71.00 | 19.17 | 每天    | 60.00  | 1.00  | 散步    | 从不吸烟 |
| 153.00 | 45.50 | 70.00 | 19.44 | 每天    | 30.00  | 1.00  | 散步    | 从不吸烟 |
| 145.00 | 63.50 | 89.00 | 30.20 | 不锻炼   |        |       |       | 从不吸烟 |
| 155.00 | 43.00 | 70.00 | 17.90 | 每天    | 30.00  | 4.00  | 散步    | 从不吸烟 |
| 157.50 | 65.50 | 88.00 | 26.40 | 每天    | 60.00  | 15.00 | 散步    | 从不吸烟 |
| 158.00 | 62.00 | 90.00 | 24.84 | 每天    | 30.00  | 5.00  | 散步    | 从不吸烟 |
| 145.00 | 40.00 | 61.00 | 19.02 | 每天    | 30.00  | 1.00  | 散步    | 从不吸烟 |
| 150.00 | 58.00 | 87.00 | 25.78 | 每天    | 30.00  | 4.00  | 散步    | 从不吸烟 |
| 152.00 | 64.00 | 97.00 | 27.70 | 不锻炼   |        |       |       | 从不吸烟 |
| 153.00 | 60.00 | 95.00 | 25.63 | 不锻炼   |        |       |       | 从不吸烟 |
| 145.00 | 42.00 | 83.00 | 19.98 | 每天    | 30.00  | 2.00  | 散步    | 从不吸烟 |
| 158.00 | 51.60 | 81.00 | 20.67 | 每天    | 30.00  | 4.00  | 散步    | 从不吸烟 |
| 154.50 | 60.80 | 90.00 | 25.47 | 每天    | 30.00  | 4.00  | 散步    | 从不吸烟 |
| 139.00 | 42.00 | 80.00 | 21.74 | 不锻炼   |        |       |       | 从不吸烟 |
| 154.00 | 48.00 | 76.00 | 20.24 | 每周一次↓ | 30.00  | 1.00  | 散步    | 从不吸烟 |

|        |       |        |       |       |        |       |    |      |
|--------|-------|--------|-------|-------|--------|-------|----|------|
| 157.00 | 69.00 | 101.00 | 27.99 | 每天    | 60.00  | 1.00  | 散步 | 从不吸烟 |
| 146.00 | 49.00 | 84.00  | 22.99 | 每周一次↓ | 30.00  | 1.00  | 散步 | 从不吸烟 |
| 160.00 | 65.00 | 94.00  | 25.39 | 每天    | 30.00  | 2.00  | 散步 | 从不吸烟 |
| 153.00 | 64.00 | 101.00 | 27.34 | 不锻炼   |        |       |    | 从不吸烟 |
| 144.00 | 58.00 | 91.00  | 27.97 | 每天    | 30.00  | 11.00 | 散步 | 从不吸烟 |
| 150.00 | 42.00 | 69.00  | 18.67 | 每天    | 30.00  | 3.00  | 散步 | 从不吸烟 |
| 162.00 | 72.00 | 92.00  | 27.43 | 每天    | 30.00  | 7.00  | 散步 | 从不吸烟 |
| 157.00 | 62.00 | 98.00  | 25.15 | 不锻炼   |        |       |    | 从不吸烟 |
| 148.00 | 50.00 | 72.00  | 22.83 | 不锻炼   |        |       |    | 从不吸烟 |
| 158.50 | 59.40 | 83.00  | 23.64 | 每天    | 30.00  | 4.00  | 散步 | 从不吸烟 |
| 145.00 | 44.00 | 90.00  | 20.93 | 不锻炼   |        |       |    | 从不吸烟 |
| 162.50 | 84.00 | 105.00 | 31.81 | 每天    | 30.00  | 5.00  | 散步 | 从不吸烟 |
| 152.00 | 54.20 | 81.00  | 23.46 | 不锻炼   |        |       |    | 从不吸烟 |
| 145.50 | 36.50 | 64.00  | 17.24 | 不锻炼   |        |       |    | 从不吸烟 |
| 138.00 | 44.00 | 86.00  | 23.10 | 不锻炼   |        |       |    | 从不吸烟 |
| 148.00 | 54.70 | 88.00  | 24.97 | 每天    | 60.00  | 10.00 | 散步 | 从不吸烟 |
| 153.00 | 60.00 | 94.00  | 25.63 | 每天    | 30.00  | 4.00  | 散步 | 从不吸烟 |
| 153.00 | 61.00 | 94.00  | 26.06 | 每周一次↓ | 60.00  | 1.00  | 散步 | 从不吸烟 |
| 156.50 | 61.00 | 85.00  | 24.91 | 每天    | 60.00  | 4.00  | 散步 | 从不吸烟 |
| 149.00 | 52.00 | 86.00  | 23.42 | 每天    | 30.00  | 2.00  | 散步 | 从不吸烟 |
| 146.00 | 45.00 | 70.00  | 21.11 | 不锻炼   |        |       |    | 从不吸烟 |
| 142.50 | 63.35 | 101.00 | 31.20 | 不锻炼   |        |       |    | 从不吸烟 |
| 143.00 | 54.00 | 83.00  | 26.41 | 不锻炼   |        |       |    | 从不吸烟 |
| 147.00 | 55.00 | 90.00  | 25.45 | 每天    | 30.00  | 5.00  | 散步 | 从不吸烟 |
| 150.00 | 60.60 | 94.00  | 26.93 | 不锻炼   |        |       |    | 从不吸烟 |
| 158.00 | 42.00 | 68.00  | 16.82 | 不锻炼   |        |       |    | 从不吸烟 |
| 164.00 | 66.00 | 86.00  | 24.54 | 每天    | 30.00  |       | 散步 | 从不吸烟 |
| 148.00 | 41.50 | 66.00  | 18.95 | 每天    | 90.00  | 20.00 | 跳舞 | 从不吸烟 |
| 150.00 | 56.00 | 88.00  | 24.89 | 每天    | 30.00  | 5.00  | 跳舞 | 从不吸烟 |
| 154.50 | 51.10 | 79.00  | 21.41 | 每天    | 120.00 | 10.00 | 散步 | 从不吸烟 |
| 152.00 | 63.00 | 81.00  | 27.27 | 每周一次↓ | 30.00  | 1.00  | 散步 | 从不吸烟 |
| 143.00 | 50.50 | 91.00  | 24.70 | 不锻炼   |        |       |    | 从不吸烟 |
| 152.00 | 54.00 | 86.00  | 23.37 | 不锻炼   |        |       |    | 从不吸烟 |
| 154.00 | 44.00 | 66.00  | 18.55 | 每天    | 60.00  | 1.00  | 散步 | 从不吸烟 |
| 156.00 | 63.00 | 92.00  | 25.89 | 每天    | 30.00  | 11.00 | 散步 | 从不吸烟 |
| 154.00 | 46.00 | 80.00  | 19.40 | 不锻炼   |        |       |    | 从不吸烟 |
| 144.00 | 36.00 | 68.00  | 17.36 | 每天    | 30.00  | 4.00  | 散步 | 从不吸烟 |
| 150.00 | 54.00 | 87.00  | 24.00 | 每天    | 30.00  | 5.00  | 散步 | 从不吸烟 |
| 156.00 | 68.00 | 96.00  | 27.94 | 每天    | 30.00  | 2.00  | 散步 | 从不吸烟 |
| 150.00 | 49.00 | 79.00  | 21.78 | 每周一次↓ | 40.00  | 3.00  | 散步 | 从不吸烟 |
| 139.00 | 40.00 | 81.00  | 20.70 | 不锻炼   |        |       |    | 从不吸烟 |
| 150.00 | 49.00 | 86.00  | 21.78 | 每天    | 30.00  | 4.00  | 散步 | 从不吸烟 |
| 143.00 | 58.50 | 88.00  | 28.61 | 不锻炼   |        |       |    | 从不吸烟 |
| 153.00 | 56.00 | 82.00  | 23.92 | 每天    | 60.00  | 2.00  | 散步 | 从不吸烟 |
| 158.00 | 76.80 | 100.00 | 30.76 | 每天    | 60.00  | 1.00  | 散步 | 从不吸烟 |
| 150.00 | 46.10 | 75.00  | 20.49 | 每天    | 60.00  | 5.00  | 散步 | 从不吸烟 |
| 158.00 | 46.00 | 72.00  | 18.43 | 每天    | 60.00  | 1.00  | 散步 | 从不吸烟 |
| 151.00 | 53.00 | 83.00  | 23.24 | 每天    | 30.00  | 5.00  | 散步 | 从不吸烟 |
| 151.00 | 65.50 | 92.00  | 28.73 | 每天    | 60.00  | 4.00  | 散步 | 从不吸烟 |
| 143.00 | 58.00 | 81.00  | 28.36 | 每天    | 30.00  | 1.00  | 散步 | 从不吸烟 |
| 152.00 | 55.70 | 84.00  | 24.11 | 每天    | 60.00  | 1.00  | 散步 | 从不吸烟 |

|        |       |        |       |       |        |       |       |      |
|--------|-------|--------|-------|-------|--------|-------|-------|------|
| 147.00 | 70.00 | 94.00  | 32.39 | 每天    | 30.00  | 7.00  | 散步    | 从不吸烟 |
| 159.00 | 79.00 | 92.00  | 31.25 | 每天    | 40.00  | 1.00  | 散步    | 从不吸烟 |
| 151.00 | 58.80 | 87.00  | 25.79 | 每天    | 60.00  | 2.00  | 散步    | 从不吸烟 |
| 152.00 | 47.00 | 73.00  | 20.34 | 每天    | 30.00  | 1.00  | 跑步    | 从不吸烟 |
| 154.00 | 61.50 | 88.00  | 25.93 | 每天    | 120.00 | 2.00  | 散步    | 从不吸烟 |
| 148.00 | 39.00 | 64.00  | 17.80 | 每天    | 15.00  | 8.00  | 体操    | 从不吸烟 |
| 144.00 | 40.00 | 71.00  | 19.29 | 每周一次↓ | 30.00  | 1.00  | 散步    | 从不吸烟 |
| 156.00 | 61.00 | 94.00  | 25.07 | 每天    | 30.00  | 6.00  | 散步    | 从不吸烟 |
| 144.00 | 57.00 | 92.00  | 27.49 | 每天    | 30.00  | 10.00 | 散步    | 从不吸烟 |
| 146.50 | 63.00 | 101.00 | 29.35 | 不锻炼   |        |       |       | 从不吸烟 |
| 151.00 | 60.00 | 93.00  | 26.31 | 每周一次↓ | 30.00  | 2.00  | 散步    | 从不吸烟 |
| 152.00 | 57.90 | 89.00  | 25.06 | 每天    | 60.00  | 18.00 | 散步    | 从不吸烟 |
| 150.00 | 62.50 | 86.00  | 27.78 | 每天    | 40.00  | 1.00  | 散步    | 从不吸烟 |
| 138.00 | 45.00 | 76.00  | 23.63 | 不锻炼   |        |       |       | 从不吸烟 |
| 156.00 | 71.00 | 104.00 | 29.17 | 每天    | 30.00  | 6.00  | 散步    | 从不吸烟 |
| 159.50 | 69.50 | 91.00  | 27.32 | 每天    | 60.00  | 7.00  | 散步    | 从不吸烟 |
| 156.00 | 63.50 | 86.00  | 26.09 | 每天    | 30.00  | 6.00  | 跳舞    | 从不吸烟 |
| 155.00 | 51.00 | 84.00  | 21.23 | 每天    | 30.00  | 4.00  | 太极    | 从不吸烟 |
| 155.00 | 51.00 | 68.00  | 21.23 | 每天    | 40.00  | 1.00  | 散步    | 从不吸烟 |
| 150.00 | 48.30 | 82.00  | 21.47 | 每天    | 60.00  | 4.00  | 散步    | 从不吸烟 |
| 143.00 | 33.50 | 61.00  | 16.38 | 每天    | 60.00  | 11.00 | 散步    | 从不吸烟 |
| 145.00 | 50.00 | 85.00  | 23.78 | 每天    | 60.00  | 12.00 | 散步    | 从不吸烟 |
| 142.00 | 39.00 | 86.00  | 19.34 | 每天    | 20.00  | 7.00  | 散步    | 从不吸烟 |
| 145.00 | 59.00 | 100.00 | 28.06 | 每天    | 20.00  | 6.00  | 散步    | 从不吸烟 |
| 143.00 | 55.00 | 90.00  | 26.90 | 每天    | 30.00  | 8.00  | 散步    | 从不吸烟 |
| 149.00 | 51.00 | 72.00  | 22.97 | 每天    | 60.00  | 4.00  | 散步    | 从不吸烟 |
| 141.00 | 49.00 | 84.00  | 24.65 | 每天    | 30.00  | 2.00  | 散步    | 从不吸烟 |
| 146.00 | 62.50 | 86.00  | 29.32 | 每天    | 60.00  | 7.00  | 跳舞    | 从不吸烟 |
| 148.00 | 54.00 | 86.00  | 24.65 | 每天    | 60.00  | 3.00  | 散步    | 从不吸烟 |
| 151.00 | 37.50 | 60.00  | 16.45 | 不锻炼   |        |       |       | 从不吸烟 |
| 149.00 | 62.50 | 97.00  | 28.15 | 每天    | 60.00  | 3.00  | 散步    | 从不吸烟 |
| 151.00 | 52.00 | 84.00  | 22.81 | 每周一次↓ | 30.00  | 1.00  | 散步    | 从不吸烟 |
| 157.00 | 59.00 | 90.00  | 23.94 | 每天    | 120.00 | 16.00 | 散步    | 从不吸烟 |
| 145.00 | 50.00 | 93.00  | 23.78 | 每周一次↓ | 30.00  | 5.00  | 散步    | 从不吸烟 |
| 157.00 | 45.00 | 62.00  | 18.26 | 每天    | 30.00  | 10.00 | 散步    | 吸烟   |
| 136.00 | 35.50 | 69.00  | 19.19 | 不锻炼   |        |       |       | 从不吸烟 |
| 153.00 | 53.50 | 84.00  | 22.85 | 不锻炼   |        |       |       | 从不吸烟 |
| 156.00 | 62.00 | 95.00  | 25.48 | 每天    | 60.00  | 5.00  | 打乒乓球、 | 从不吸烟 |
| 152.00 | 56.00 | 87.00  | 24.24 | 每天    | 30.00  | 2.00  | 散步    | 从不吸烟 |
| 153.00 | 71.00 | 95.00  | 30.33 | 每周一次↓ | 30.00  | 3.00  | 散步    | 从不吸烟 |
| 151.50 | 68.00 | 96.00  | 29.63 | 每天    | 30.00  | 13.00 | 散步    | 从不吸烟 |
| 133.00 | 39.00 | 78.00  | 22.05 | 每天    | 30.00  | 3.00  | 散步    | 从不吸烟 |
| 156.00 | 65.00 | 86.00  | 26.71 | 不锻炼   |        |       |       | 从不吸烟 |
| 154.00 | 71.70 | 101.00 | 30.23 | 不锻炼   |        |       |       | 从不吸烟 |
| 154.00 | 57.00 | 81.00  | 24.03 | 不锻炼   |        |       |       | 从不吸烟 |
| 150.00 | 55.00 | 86.00  | 24.44 | 不锻炼   |        |       |       | 从不吸烟 |
| 155.00 | 54.00 | 81.00  | 22.48 | 每天    | 60.00  | 4.00  | 散步    | 从不吸烟 |
| 155.00 | 51.50 | 79.00  | 21.44 | 每天    | 30.00  | 2.00  | 散步    | 从不吸烟 |
| 153.00 | 68.00 | 92.00  | 29.05 | 每天    | 30.00  | 4.00  | 散步    | 从不吸烟 |
| 161.00 | 54.00 | 84.00  | 20.83 | 每周一次↓ | 30.00  | 10.00 | 散步    | 从不吸烟 |
| 155.00 | 64.00 | 93.00  | 26.64 | 不锻炼   |        |       |       | 从不吸烟 |

|        |       |        |       |       |       |       |       |      |
|--------|-------|--------|-------|-------|-------|-------|-------|------|
| 154.00 | 44.00 | 71.00  | 18.55 | 每天    | 30.00 | 1.00  | 散步    | 从不吸烟 |
| 154.00 | 54.00 | 86.00  | 22.77 | 每天    | 30.00 | 6.00  | 散步    | 从不吸烟 |
| 152.00 | 60.00 | 88.00  | 25.97 | 每天    | 30.00 | 1.00  | 散步    | 从不吸烟 |
| 154.00 | 74.00 | 95.00  | 31.20 | 每周一次! | 30.00 | 1.00  | 散步    | 从不吸烟 |
| 159.50 | 50.00 | 79.00  | 19.65 | 每天    | 60.00 | 6.00  | 散步    | 从不吸烟 |
| 147.00 | 60.50 | 88.00  | 28.00 | 每天    | 60.00 | 5.00  | 散步    | 从不吸烟 |
| 143.00 | 49.00 | 87.00  | 23.96 | 不锻炼   |       |       |       | 从不吸烟 |
| 152.00 | 50.00 | 72.00  | 21.64 | 不锻炼   |       |       |       | 从不吸烟 |
| 160.00 | 62.00 | 94.00  | 24.22 | 每天    | 60.00 | 2.00  | 散步    | 从不吸烟 |
| 155.00 | 67.00 | 101.00 | 27.89 | 每天    | 60.00 | 1.00  | 散步    | 从不吸烟 |
| 148.00 | 52.00 | 80.00  | 23.74 | 不锻炼   |       |       |       | 从不吸烟 |
| 154.00 | 60.00 | 83.00  | 25.30 | 每天    | 30.00 | 12.00 | 散步    | 从不吸烟 |
| 148.00 | 60.00 | 98.00  | 27.39 | 不锻炼   |       |       |       | 从不吸烟 |
| 149.00 | 65.00 | 102.00 | 29.28 | 不锻炼   |       |       |       | 从不吸烟 |
| 152.00 | 58.80 | 89.00  | 25.45 | 不锻炼   |       |       |       | 从不吸烟 |
| 149.00 | 62.50 | 90.00  | 28.15 | 不锻炼   |       |       |       | 从不吸烟 |
| 161.00 | 61.50 | 98.00  | 23.73 | 每天    | 60.00 | 3.00  | 散步    | 从不吸烟 |
| 150.00 | 43.00 | 67.00  | 19.11 | 每天    | 60.00 | 5.00  | 散步    | 从不吸烟 |
| 149.00 | 58.00 | 86.00  | 26.12 | 每天    | 30.00 | 12.00 | 散步    | 从不吸烟 |
| 144.00 | 65.00 | 108.00 | 31.35 | 每周一次! | 20.00 | 2.00  | 散步    | 从不吸烟 |
| 162.00 | 79.50 | 104.00 | 30.29 | 每天    | 60.00 | 4.00  | 散步    | 从不吸烟 |
| 157.00 | 66.00 | 90.00  | 26.78 | 每周一次! | 30.00 | 2.00  | 散步    | 从不吸烟 |
| 154.00 | 52.00 | 82.00  | 21.93 | 每天    | 30.00 | 9.00  | 散步    | 从不吸烟 |
| 157.50 | 54.80 | 89.00  | 22.09 | 每周一次! | 30.00 | 1.00  | 散步    | 从不吸烟 |
| 154.00 | 42.00 | 77.00  | 17.71 | 每天    | 30.00 | 2.00  | 散步    | 从不吸烟 |
| 152.00 | 54.00 | 89.00  | 23.37 | 不锻炼   |       |       |       | 从不吸烟 |
| 155.00 | 58.30 | 79.00  | 24.27 | 每天    | 60.00 | 6.00  | 散步    | 从不吸烟 |
| 148.00 | 50.00 | 85.00  | 22.83 | 不锻炼   |       |       |       | 从不吸烟 |
| 147.00 | 54.00 | 88.00  | 24.99 | 不锻炼   |       |       |       | 从不吸烟 |
| 151.00 | 58.50 | 89.00  | 25.66 | 每天    | 30.00 | 2.00  | 散步    | 从不吸烟 |
| 155.00 | 59.00 | 98.00  | 24.56 | 每天    | 15.00 | 1.00  | 散步    | 从不吸烟 |
| 141.00 | 43.00 | 84.00  | 21.63 | 每天    | 40.00 | 12.00 | 散步    | 从不吸烟 |
| 159.00 | 67.00 | 98.00  | 26.50 | 每天    | 30.00 | 1.00  | 散步,打太 | 从不吸烟 |
| 146.00 | 39.00 | 72.00  | 18.30 | 不锻炼   |       |       |       | 从不吸烟 |
| 150.00 | 60.50 | 91.00  | 26.89 | 每天    | 30.00 | 1.00  | 散步    | 从不吸烟 |
| 150.00 | 69.00 | 99.00  | 30.67 | 不锻炼   |       |       |       | 从不吸烟 |
| 151.00 | 45.00 | 70.00  | 19.74 | 不锻炼   |       |       |       | 从不吸烟 |
| 158.00 | 45.00 | 65.00  | 18.03 | 每天    | 60.00 | 1.00  | 散步    | 从不吸烟 |
| 138.00 | 39.00 | 81.00  | 20.48 | 每天    | 60.00 | 1.00  | 散步    | 从不吸烟 |
| 143.00 | 49.00 | 82.00  | 23.96 | 每天    | 30.00 | 5.00  | 做操    | 从不吸烟 |
| 146.00 | 53.00 | 90.00  | 24.86 | 不锻炼   |       |       |       | 从不吸烟 |
| 157.00 | 60.00 | 89.00  | 24.34 | 不锻炼   |       |       |       | 从不吸烟 |
| 150.00 | 62.00 | 87.00  | 27.56 | 每天    | 30.00 | 2.00  | 散步    | 从不吸烟 |
| 146.00 | 78.00 | 106.00 | 36.59 | 每天    | 40.00 | 4.00  | 散步    | 从不吸烟 |
| 157.00 | 77.00 | 99.00  | 31.24 | 每天    | 30.00 | 5.00  | 散步    | 从不吸烟 |
| 151.00 | 48.00 | 72.00  | 21.05 | 每天    | 30.00 | 1.00  | 散步    | 从不吸烟 |
| 145.00 | 45.00 | 72.00  | 21.40 | 每天    | 30.00 | 2.00  | 保健操   | 从不吸烟 |
| 152.00 | 51.00 | 76.00  | 22.07 | 每天    | 30.00 | 4.00  | 散步    | 从不吸烟 |
| 154.00 | 61.00 | 91.00  | 25.72 | 每天    | 30.00 | 1.00  | 散步    | 从不吸烟 |
| 151.00 | 56.00 | 89.00  | 24.56 | 每周一次! | 30.00 | 1.00  | 散步    | 吸烟   |
| 160.00 | 63.00 | 76.00  | 24.61 | 每天    | 30.00 | 1.00  | 散步    | 从不吸烟 |

|        |       |        |       |       |       |       |      |      |
|--------|-------|--------|-------|-------|-------|-------|------|------|
| 146.50 | 43.30 | 70.00  | 20.17 | 每周一次↓ | 30.00 | 3.00  | 散步   | 从不吸烟 |
| 148.00 | 55.00 | 88.00  | 25.11 | 不锻炼   |       |       |      | 从不吸烟 |
| 146.00 | 41.00 | 72.00  | 19.23 | 每天    | 30.00 | 7.00  | 散步   | 从不吸烟 |
| 150.50 | 55.00 | 86.00  | 24.28 | 不锻炼   |       |       |      | 从不吸烟 |
| 152.00 | 63.00 | 90.00  | 27.27 | 不锻炼   |       |       |      | 从不吸烟 |
| 154.00 | 63.00 | 94.00  | 26.56 | 每天    | 40.00 | 10.00 | 散步   | 从不吸烟 |
| 158.00 | 46.00 | 75.00  | 18.43 | 每天    | 60.00 | 12.00 | 散步   | 从不吸烟 |
| 152.00 | 65.00 | 90.00  | 28.13 | 每天    | 30.00 | 2.00  | 散步   | 从不吸烟 |
| 147.00 | 54.00 | 89.00  | 24.99 | 每天    | 20.00 | 6.00  | 散步   | 从不吸烟 |
| 155.00 | 62.00 | 89.00  | 25.81 | 每天    | 30.00 | 10.00 | 散步   | 从不吸烟 |
| 139.50 | 41.10 | 78.50  | 21.12 | 不锻炼   |       |       |      | 从不吸烟 |
| 149.00 | 44.00 | 83.00  | 19.82 | 每天    | 30.00 | 1.00  | 散步   | 从不吸烟 |
| 142.00 | 46.00 | 84.00  | 22.81 | 每天    | 60.00 | 4.00  | 散步   | 从不吸烟 |
| 144.00 | 50.00 | 88.00  | 24.11 | 每天    | 60.00 | 2.00  | 散步   | 从不吸烟 |
| 146.00 | 40.00 | 77.00  | 18.77 | 不锻炼   |       |       |      | 从不吸烟 |
| 148.00 | 54.80 | 90.00  | 25.02 | 每天    | 20.00 | 1.00  | 散步   | 从不吸烟 |
| 153.30 | 40.00 | 76.00  | 17.02 | 每周一次↓ | 60.00 | 4.00  | 散步   | 从不吸烟 |
| 150.00 | 56.50 | 85.00  | 25.11 | 每周一次↓ | 30.00 | 5.00  | 散步   | 从不吸烟 |
| 151.00 | 50.00 | 82.00  | 21.93 | 每天    | 60.00 | 7.00  | 散步   | 从不吸烟 |
| 152.00 | 46.00 | 84.00  | 19.91 | 不锻炼   |       |       |      | 从不吸烟 |
| 148.00 | 50.50 | 86.00  | 23.06 | 不锻炼   |       |       |      | 从不吸烟 |
| 143.00 | 51.00 | 84.00  | 24.94 | 每天    | 30.00 | 7.00  | 散步   | 从不吸烟 |
| 148.00 | 51.00 | 83.00  | 23.28 | 每天    | 60.00 | 1.00  | 散步   | 从不吸烟 |
| 147.00 | 51.00 | 75.00  | 23.60 | 每周一次↓ | 30.00 | 1.00  | 散步   | 从不吸烟 |
| 147.00 | 40.50 | 70.00  | 18.74 | 每天    | 60.00 | 6.00  | 散步   | 从不吸烟 |
| 145.00 | 58.00 | 88.00  | 27.59 | 每天    | 30.00 | 6.00  | 散步   | 从不吸烟 |
| 148.00 | 48.00 | 84.00  | 21.91 | 每周一次↓ | 10.00 | 1.00  | 被动运动 | 从不吸烟 |
| 153.00 | 60.50 | 88.00  | 25.84 | 每天    | 30.00 | 1.00  | 散步   | 从不吸烟 |
| 156.00 | 51.00 | 78.00  | 20.96 | 每天    | 30.00 | 2.00  | 散步   | 从不吸烟 |
| 168.00 | 73.00 | 95.00  | 25.86 | 每天    | 30.00 | 16.00 | 散步   | 从不吸烟 |
| 144.00 | 53.00 | 85.00  | 25.56 | 不锻炼   |       |       |      | 从不吸烟 |
| 148.00 | 58.00 | 84.00  | 26.48 | 每天    | 60.00 | 2.00  | 散步   | 从不吸烟 |
| 143.00 | 44.00 | 74.00  | 21.52 | 不锻炼   |       |       |      | 从不吸烟 |
| 158.00 | 55.50 | 77.00  | 22.23 | 每天    | 30.00 | 2.00  | 散步   | 从不吸烟 |
| 140.00 | 40.00 | 76.00  | 20.41 | 不锻炼   |       |       |      | 从不吸烟 |
| 158.00 | 79.80 | 99.00  | 31.97 | 每天    | 30.00 | 4.00  | 散步   | 从不吸烟 |
| 144.00 | 47.00 | 73.00  | 22.67 | 每天    | 30.00 | 1.00  | 散步   | 从不吸烟 |
| 150.00 | 50.00 | 89.00  | 22.22 | 不锻炼   |       |       |      | 从不吸烟 |
| 151.00 | 61.00 | 93.00  | 26.75 | 不锻炼   |       |       |      | 从不吸烟 |
| 153.00 | 64.50 | 87.00  | 27.55 | 不锻炼   |       |       |      | 从不吸烟 |
| 155.00 | 57.00 | 96.00  | 23.73 | 每天    | 30.00 | 1.00  | 散步   | 从不吸烟 |
| 150.00 | 51.00 | 78.00  | 22.67 | 每周一次↓ | 30.00 | 5.00  | 散步   | 从不吸烟 |
| 157.00 | 73.00 | 98.00  | 29.62 | 每天    | 30.00 | 1.00  | 散步   | 从不吸烟 |
| 150.00 | 55.00 | 92.00  | 24.44 | 不锻炼   |       |       |      | 从不吸烟 |
| 160.00 | 67.20 | 99.00  | 26.25 | 每天    | 20.00 | 5.00  | 散步   | 从不吸烟 |
| 150.00 | 63.50 | 89.00  | 28.22 | 每天    | 30.00 | 5.00  | 散步   | 从不吸烟 |
| 150.00 | 69.60 | 96.00  | 30.93 | 每天    | 30.00 | 2.00  | 散步   | 从不吸烟 |
| 146.00 | 55.50 | 91.00  | 26.04 | 每天    | 60.00 | 4.00  | 散步   | 从不吸烟 |
| 150.00 | 55.50 | 87.00  | 24.67 | 每天    | 60.00 | 5.00  | 跳舞   | 从不吸烟 |
| 151.00 | 54.30 | 93.00  | 23.81 | 每天    | 45.00 | 10.00 | 散步   | 从不吸烟 |
| 153.00 | 82.90 | 111.00 | 35.41 | 不锻炼   |       |       |      | 从不吸烟 |

|        |       |        |       |       |       |       |        |      |
|--------|-------|--------|-------|-------|-------|-------|--------|------|
| 153.00 | 56.60 | 78.00  | 24.18 | 不锻炼   |       |       |        | 从不吸烟 |
| 153.00 | 66.00 | 91.00  | 28.19 | 每天    | 60.00 | 2.00  | 散步     | 从不吸烟 |
| 137.00 | 35.00 | 74.00  | 18.65 | 每天    | 60.00 | 8.00  | 散步     | 从不吸烟 |
| 156.50 | 65.00 | 88.00  | 26.54 | 每周一次↓ | 60.00 | 13.00 | 散步     | 从不吸烟 |
| 155.00 | 51.00 | 80.00  | 21.23 | 不锻炼   |       |       |        | 从不吸烟 |
| 155.00 | 44.00 | 79.00  | 18.31 | 每天    | 30.00 | 27.00 | 散步     | 从不吸烟 |
| 145.00 | 51.00 | 90.00  | 24.26 | 每天    | 30.00 | 11.00 | 散步     | 从不吸烟 |
| 151.00 | 66.20 | 92.00  | 29.03 | 每天    | 30.00 | 1.00  | 散步     | 从不吸烟 |
| 149.00 | 49.10 | 78.00  | 22.12 | 每天    | 60.00 | 13.00 | 散步     | 从不吸烟 |
| 154.00 | 62.80 | 94.00  | 26.48 | 每天    | 60.00 | 7.00  | 散步     | 从不吸烟 |
| 141.50 | 52.40 | 90.00  | 26.17 | 每天    | 30.00 | 2.00  | 散步     | 从不吸烟 |
| 162.00 | 65.00 | 97.00  | 24.77 | 每天    | 60.00 | 5.00  | 打拳, 健身 | 从不吸烟 |
| 155.00 | 66.00 | 90.00  | 27.47 | 每天    | 30.00 | 2.00  | 散步     | 从不吸烟 |
| 163.00 | 75.00 | 105.00 | 28.23 | 每周一次↓ | 60.00 | 3.00  | 散步     | 从不吸烟 |
| 152.00 | 57.00 | 83.00  | 24.67 | 不锻炼   |       |       |        | 从不吸烟 |
| 150.00 | 52.50 | 83.00  | 23.33 | 每天    | 60.00 | 15.00 | 打太极    | 从不吸烟 |
| 152.00 | 60.00 | 91.00  | 25.97 | 每天    | 30.00 | 1.00  | 做操     | 从不吸烟 |
| 146.00 | 50.00 | 83.00  | 23.46 | 每周一次↓ | 30.00 | 1.00  | 散步     | 从不吸烟 |
| 154.00 | 54.00 | 82.00  | 22.77 | 不锻炼   |       |       |        | 从不吸烟 |
| 150.00 | 35.50 | 66.00  | 15.78 | 每天    | 60.00 | 2.00  | 散步     | 从不吸烟 |
| 163.00 | 56.50 | 87.00  | 21.27 | 每天    | 40.00 | 2.00  | 散步     | 从不吸烟 |
| 143.00 | 58.00 | 89.00  | 28.36 | 每天    | 60.00 | 12.00 | 散步, 跳绳 | 从不吸烟 |
| 154.50 | 62.00 | 87.00  | 25.97 | 不锻炼   |       |       |        | 从不吸烟 |
| 156.00 | 65.00 | 91.00  | 26.71 | 不锻炼   |       |       |        | 从不吸烟 |
| 157.00 | 62.00 | 91.00  | 25.15 | 每天    | 50.00 | 11.00 | 散步     | 从不吸烟 |
| 155.50 | 80.50 | 98.00  | 33.29 | 每天    | 60.00 | 1.00  | 散步     | 从不吸烟 |
| 146.50 | 53.10 | 87.00  | 24.74 | 每天    | 60.00 | 5.00  | 散步     | 从不吸烟 |
| 159.00 | 43.00 | 77.00  | 17.01 | 每周一次↓ | 20.00 | 5.00  | 散步     | 从不吸烟 |
| 152.50 | 58.50 | 90.00  | 25.15 | 每天    | 30.00 | 5.00  | 散步     | 从不吸烟 |
| 151.00 | 48.00 | 88.00  | 21.05 | 每天    | 60.00 | 4.00  | 散步     | 从不吸烟 |
| 147.00 | 57.50 | 90.00  | 26.61 | 每天    | 60.00 | 3.00  | 散步     | 从不吸烟 |
| 143.00 | 56.50 | 88.00  | 27.63 | 每天    | 30.00 | 2.00  | 散步     | 从不吸烟 |
| 147.00 | 54.00 | 84.00  | 24.99 | 不锻炼   |       |       |        | 从不吸烟 |
| 150.00 | 63.00 | 93.00  | 28.00 | 每天    | 25.00 | 2.00  | 散步     | 从不吸烟 |
| 158.50 | 48.50 | 74.00  | 19.31 | 不锻炼   |       |       |        | 从不吸烟 |
| 144.00 | 52.00 | 82.00  | 25.08 | 每天    | 60.00 | 2.00  | 散步     | 从不吸烟 |
| 158.50 | 63.40 | 89.00  | 25.24 | 每天    | 30.00 | 13.00 | 打太极    | 从不吸烟 |
| 151.00 | 50.00 | 79.00  | 21.93 | 每周一次↓ | 30.00 | 1.00  | 散步     | 从不吸烟 |
| 153.00 | 62.00 | 90.00  | 26.49 | 不锻炼   |       |       |        | 从不吸烟 |
| 152.00 | 61.00 | 83.00  | 26.40 | 每天    | 30.00 | 9.00  | 散步     | 从不吸烟 |
| 145.00 | 54.00 | 90.00  | 25.68 | 每天    | 60.00 | 8.00  | 散步     | 从不吸烟 |
| 143.00 | 50.00 | 88.00  | 24.45 | 不锻炼   |       |       |        | 从不吸烟 |
| 165.00 | 75.00 | 95.00  | 27.55 | 每周一次↓ | 30.00 | 2.00  | 散步     | 从不吸烟 |
| 149.00 | 58.50 | 84.00  | 26.35 | 每天    | 60.00 | 5.00  | 散步     | 从不吸烟 |
| 157.00 | 59.00 | 70.00  | 23.94 | 每天    | 35.00 | 1.00  | 晨操     | 从不吸烟 |
| 152.00 | 79.00 | 103.00 | 34.19 | 每周一次↓ | 30.00 | 5.00  | 散步     | 从不吸烟 |
| 149.00 | 54.00 | 85.00  | 24.32 | 每天    | 20.00 | 8.00  | 散步     | 从不吸烟 |
| 158.00 | 54.00 | 88.00  | 21.63 | 不锻炼   |       |       |        | 从不吸烟 |
| 150.50 | 49.00 | 76.00  | 21.63 | 每天    | 30.00 | 10.00 | 散步     | 从不吸烟 |
| 153.00 | 45.40 | 82.00  | 19.39 | 每天    | 30.00 | 5.00  | 散步     | 从不吸烟 |
| 158.00 | 59.00 | 82.00  | 23.63 | 不锻炼   |       |       |        | 从不吸烟 |

|        |       |        |       |       |       |       |      |      |
|--------|-------|--------|-------|-------|-------|-------|------|------|
| 150.00 | 62.00 | 91.00  | 27.56 | 每天    | 30.00 | 6.00  | 散步   | 从不吸烟 |
| 160.00 | 75.00 | 89.00  | 29.30 | 每天    | 60.00 | 15.00 | 散步、打 | 从不吸烟 |
| 147.50 | 65.40 | 88.00  | 30.06 | 不锻炼   |       |       |      | 从不吸烟 |
| 147.00 | 58.00 | 95.00  | 26.84 | 每天    | 30.00 | 12.00 | 散步   | 从不吸烟 |
| 150.00 | 46.00 | 78.00  | 20.44 | 每天    | 30.00 | 6.00  | 散步   | 从不吸烟 |
| 158.00 | 74.00 | 94.00  | 29.64 | 每天    | 60.00 | 2.00  | 散步   | 从不吸烟 |
| 144.00 | 46.00 | 71.00  | 22.18 | 每天    | 60.00 | 14.00 | 散步   | 从不吸烟 |
| 150.00 | 58.40 | 94.00  | 25.96 | 每天    | 60.00 | 6.00  | 散步   | 从不吸烟 |
| 149.00 | 58.00 | 94.00  | 26.12 | 每天    | 60.00 | 11.00 | 散步   | 从不吸烟 |
| 151.00 | 50.00 | 75.00  | 21.93 | 每天    | 30.00 | 1.00  | 散步   | 从不吸烟 |
| 154.00 | 52.00 | 85.00  | 21.93 | 每天    | 60.00 | 13.00 | 散步   | 从不吸烟 |
| 147.50 | 53.30 | 92.00  | 24.50 | 每天    | 30.00 | 3.00  | 散步   | 从不吸烟 |
| 155.00 | 55.70 | 84.00  | 23.18 | 每天    | 40.00 | 6.00  | 散步   | 从不吸烟 |
| 152.00 | 48.00 | 84.00  | 20.78 | 不锻炼   |       |       |      | 从不吸烟 |
| 157.00 | 60.40 | 83.00  | 24.50 | 每天    | 30.00 | 10.00 | 散步   | 从不吸烟 |
| 146.00 | 54.00 | 77.00  | 25.33 | 每天    | 30.00 | 4.00  | 散步   | 从不吸烟 |
| 154.00 | 80.00 | 93.00  | 33.73 | 每天    | 60.00 | 3.00  | 散步   | 从不吸烟 |
| 149.00 | 53.00 | 85.00  | 23.87 | 每周一次! | 15.00 | 2.00  | 散步   | 从不吸烟 |
| 151.00 | 51.00 | 79.00  | 22.37 | 每天    | 15.00 | 5.00  | 做操   | 从不吸烟 |
| 160.00 | 48.00 | 75.00  | 18.75 | 不锻炼   |       |       |      | 从不吸烟 |
| 145.00 | 66.00 | 90.00  | 31.39 | 每天    | 30.00 | 4.00  | 散步   | 从不吸烟 |
| 161.00 | 67.65 | 83.00  | 26.10 | 每天    | 30.00 | 1.00  | 散步   | 从不吸烟 |
| 155.00 | 57.00 | 85.00  | 23.73 | 每天    | 30.00 | 12.00 | 散步   | 从不吸烟 |
| 150.50 | 66.00 | 96.00  | 29.14 | 每天    | 30.00 | 1.00  | 散步   | 从不吸烟 |
| 154.50 | 53.50 | 76.00  | 22.41 | 不锻炼   |       |       |      | 从不吸烟 |
| 153.00 | 49.00 | 83.00  | 20.93 | 每天    | 30.00 | 10.00 | 散步   | 从不吸烟 |
| 142.00 | 57.00 | 90.00  | 28.27 | 不锻炼   |       |       |      | 从不吸烟 |
| 154.00 | 62.00 | 86.00  | 26.14 | 每天    | 30.00 | 2.00  | 散步   | 从不吸烟 |
| 154.00 | 54.00 | 78.00  | 22.77 | 每周一次! | 30.00 | 1.00  | 散步   | 从不吸烟 |
| 156.00 | 54.40 | 81.00  | 22.35 | 每天    | 60.00 | 4.00  | 散步   | 从不吸烟 |
| 146.50 | 60.40 | 99.00  | 28.14 | 每天    | 30.00 | 20.00 | 做操   | 从不吸烟 |
| 148.00 | 52.80 | 90.00  | 24.11 | 每天    | 30.00 | 10.00 | 散步   | 从不吸烟 |
| 152.00 | 67.00 | 105.00 | 29.00 | 每天    | 30.00 | 5.00  | 散步   | 从不吸烟 |
| 143.00 | 50.00 | 87.00  | 24.45 | 不锻炼   |       |       |      | 从不吸烟 |
| 146.00 | 50.00 | 78.00  | 23.46 | 每天    | 30.00 | 4.00  | 散步   | 从不吸烟 |
| 154.00 | 67.30 | 99.00  | 28.38 | 不锻炼   |       |       |      | 从不吸烟 |
| 150.00 | 62.00 | 92.00  | 27.56 | 不锻炼   |       |       |      | 从不吸烟 |
| 157.00 | 63.00 | 86.00  | 25.56 | 每天    | 60.00 | 10.00 | 散步   | 从不吸烟 |
| 144.00 | 36.20 | 60.00  | 17.46 | 每天    | 40.00 | 12.00 | 散步   | 从不吸烟 |
| 153.00 | 50.00 | 75.00  | 21.36 | 每天    | 30.00 | 5.00  | 散步   | 从不吸烟 |
| 155.00 | 51.00 | 79.00  | 21.23 | 每天    | 60.00 | 8.00  | 散步   | 从不吸烟 |
| 143.00 | 55.00 | 85.00  | 26.90 | 每天    | 60.00 | 2.00  | 做操   | 从不吸烟 |
| 153.50 | 55.50 | 79.00  | 23.55 | 每天    | 60.00 | 20.00 | 散步   | 从不吸烟 |
| 157.00 | 61.40 | 99.00  | 24.91 | 不锻炼   |       |       |      | 从不吸烟 |
| 142.00 | 56.00 | 86.00  | 27.77 | 每天    | 30.00 | 4.00  | 散步   | 从不吸烟 |
| 144.00 | 52.00 | 79.00  | 25.08 | 每天    | 30.00 | 1.00  | 散步   | 从不吸烟 |
| 149.50 | 54.20 | 95.00  | 24.25 | 每天    | 30.00 | 8.00  | 散步   | 从不吸烟 |
| 144.00 | 46.50 | 76.00  | 22.42 | 每天    | 30.00 | 10.00 | 散步   | 从不吸烟 |
| 151.00 | 67.00 | 87.00  | 29.38 | 每天    | 30.00 | 5.00  | 散步   | 从不吸烟 |
| 159.00 | 67.00 | 87.00  | 26.50 | 每天    | 60.00 | 5.00  | 散步   | 从不吸烟 |
| 151.00 | 59.50 | 85.00  | 26.10 | 不锻炼   |       |       |      | 从不吸烟 |

|        |       |        |       |       |        |       |     |      |
|--------|-------|--------|-------|-------|--------|-------|-----|------|
| 145.50 | 44.50 | 76.00  | 21.02 | 不锻炼   |        |       |     | 从不吸烟 |
| 152.00 | 46.70 | 80.00  | 20.21 | 不锻炼   |        |       |     | 从不吸烟 |
| 160.00 | 73.00 | 91.00  | 28.52 | 每周一次! | 30.00  | 3.00  | 散步  | 从不吸烟 |
| 154.00 | 57.00 | 86.00  | 24.03 | 不锻炼   |        |       |     | 从不吸烟 |
| 153.00 | 65.00 | 89.00  | 27.77 | 不锻炼   |        |       |     | 从不吸烟 |
| 153.00 | 69.00 | 91.00  | 29.48 | 每天    | 30.00  | 3.00  | 散步  | 从不吸烟 |
| 158.50 | 65.90 | 90.00  | 26.23 | 每天    | 30.00  | 5.00  | 散步  | 从不吸烟 |
| 149.00 | 40.20 | 68.00  | 18.11 | 每天    | 60.00  | 3.00  | 散步  | 从不吸烟 |
| 158.00 | 54.00 | 85.00  | 21.63 | 每天    | 30.00  | 3.00  | 散步  | 从不吸烟 |
| 146.00 | 51.40 | 83.00  | 24.11 | 每天    | 30.00  | 1.00  | 散步  | 从不吸烟 |
| 157.00 | 43.50 | 61.00  | 17.65 | 每天    | 60.00  | 3.00  | 散步  | 从不吸烟 |
| 156.00 | 54.50 | 78.00  | 22.39 | 每天    | 30.00  | 6.00  | 散步  | 从不吸烟 |
| 142.00 | 50.00 | 82.00  | 24.80 | 不锻炼   |        |       |     | 从不吸烟 |
| 147.00 | 59.00 | 86.00  | 27.30 | 每天    | 60.00  | 1.00  | 保健操 | 从不吸烟 |
| 155.00 | 66.30 | 88.00  | 27.60 | 每天    | 50.00  | 10.00 | 散步  | 从不吸烟 |
| 138.00 | 46.00 | 84.00  | 24.15 | 每天    | 30.00  | 3.00  | 散步  | 从不吸烟 |
| 146.00 | 45.00 | 84.00  | 21.11 | 每天    | 60.00  | 3.00  | 散步  | 从不吸烟 |
| 149.00 | 54.00 | 82.00  | 24.32 | 不锻炼   |        |       |     | 从不吸烟 |
| 150.00 | 50.00 | 77.00  | 22.22 | 每天    | 40.00  | 2.00  | 散步  | 从不吸烟 |
| 150.50 | 52.00 | 91.00  | 22.96 | 每天    | 30.00  | 2.00  | 散步  | 从不吸烟 |
| 155.00 | 59.00 | 98.00  | 24.56 | 不锻炼   |        |       |     | 从不吸烟 |
| 147.00 | 59.00 | 79.00  | 27.30 | 每天    | 30.00  | 1.00  | 散步  | 从不吸烟 |
| 147.00 | 57.00 | 86.00  | 26.38 | 每天    | 60.00  | 6.00  | 散步  | 从不吸烟 |
| 157.00 | 48.00 | 76.00  | 19.47 | 不锻炼   |        |       |     | 从不吸烟 |
| 152.00 | 54.00 | 82.00  | 23.37 | 不锻炼   |        |       |     | 从不吸烟 |
| 146.00 | 61.00 | 95.00  | 28.62 | 每天    | 30.00  | 10.00 | 散步  | 从不吸烟 |
| 144.00 | 56.00 | 78.00  | 27.01 | 每天    | 30.00  | 1.00  | 散步  | 从不吸烟 |
| 147.00 | 55.00 | 88.00  | 25.45 | 每天    | 60.00  | 5.00  | 散步  | 从不吸烟 |
| 147.00 | 58.00 | 88.00  | 26.84 | 每天    | 60.00  | 3.00  | 做操  | 从不吸烟 |
| 154.50 | 60.40 | 83.00  | 25.30 | 每天    | 30.00  | 5.00  | 散步  | 从不吸烟 |
| 152.00 | 58.50 | 87.00  | 25.32 | 每天    | 30.00  | 15.00 | 散步  | 从不吸烟 |
| 141.00 | 38.80 | 73.00  | 19.52 | 每天    | 60.00  | 2.00  | 散步  | 从不吸烟 |
| 163.00 | 65.00 | 91.00  | 24.46 | 每天    | 20.00  | 6.00  | 散步  | 从不吸烟 |
| 150.00 | 52.50 | 87.00  | 23.33 | 不锻炼   |        |       |     | 从不吸烟 |
| 151.00 | 59.00 | 86.00  | 25.88 | 不锻炼   |        |       |     | 从不吸烟 |
| 157.00 | 66.00 | 87.00  | 26.78 | 不锻炼   |        |       |     | 从不吸烟 |
| 147.00 | 74.50 | 112.00 | 34.48 | 不锻炼   |        |       |     | 从不吸烟 |
| 154.00 | 65.00 | 94.00  | 27.41 | 每天    | 60.00  | 2.00  | 散步  | 从不吸烟 |
| 137.00 | 44.50 | 75.00  | 23.71 | 每天    | 30.00  | 2.00  | 散步  | 从不吸烟 |
| 140.00 | 44.00 | 76.00  | 22.45 | 每天    | 120.00 | 3.00  | 散步  | 从不吸烟 |
| 155.00 | 52.50 | 86.00  | 21.85 | 每周一次! | 20.00  | 1.00  | 散步  | 从不吸烟 |
| 149.00 | 63.00 | 90.00  | 28.38 | 每周一次! | 30.00  | 3.00  | 散步  | 从不吸烟 |
| 154.00 | 62.00 | 92.00  | 26.14 | 每天    | 60.00  | 2.00  | 散步  | 从不吸烟 |
| 150.00 | 67.90 | 93.00  | 30.18 | 每天    | 60.00  | 12.00 | 散步  | 从不吸烟 |
| 148.50 | 65.00 | 96.00  | 29.48 | 不锻炼   |        |       |     | 从不吸烟 |
| 153.00 | 61.00 | 88.00  | 26.06 | 不锻炼   |        |       |     | 从不吸烟 |
| 140.00 | 60.00 | 94.00  | 30.61 | 每天    | 30.00  | 1.00  | 散步  | 从不吸烟 |
| 162.00 | 51.00 | 69.00  | 19.43 | 每天    | 30.00  | 2.00  | 做操  | 从不吸烟 |
| 147.00 | 62.50 | 95.00  | 28.92 | 每天    | 60.00  | 2.00  | 散步  | 从不吸烟 |
| 156.00 | 68.00 | 92.00  | 27.94 | 每天    | 30.00  | 1.00  | 散步  | 从不吸烟 |
| 150.00 | 59.80 | 86.00  | 26.58 | 不锻炼   |        |       |     | 从不吸烟 |

|        |       |        |       |       |       |       |     |      |
|--------|-------|--------|-------|-------|-------|-------|-----|------|
| 142.00 | 41.00 | 78.00  | 20.33 | 不锻炼   |       |       |     | 从不吸烟 |
| 147.00 | 51.00 | 83.00  | 23.60 | 每天    | 30.00 | 2.00  | 散步  | 从不吸烟 |
| 139.00 | 58.00 | 97.00  | 30.02 | 每天    | 30.00 | 11.00 | 散步  | 从不吸烟 |
| 158.00 | 59.00 | 83.00  | 23.63 | 不锻炼   |       |       |     | 从不吸烟 |
| 152.00 | 40.00 | 66.00  | 17.31 | 不锻炼   |       |       |     | 从不吸烟 |
| 143.00 | 59.50 | 95.00  | 29.10 | 每天    | 30.00 | 4.00  | 散步  | 从不吸烟 |
| 148.00 | 58.00 | 87.00  | 26.48 | 每天    | 60.00 | 15.00 | 散步  | 从不吸烟 |
| 154.00 | 57.50 | 89.00  | 24.25 | 每天    | 30.00 | 1.00  | 散步  | 从不吸烟 |
| 168.00 | 61.00 | 81.00  | 21.61 | 不锻炼   |       |       |     | 从不吸烟 |
| 139.00 | 50.00 | 94.00  | 25.88 | 不锻炼   |       |       |     | 从不吸烟 |
| 147.00 | 43.50 | 68.00  | 20.13 | 每周一次! | 30.00 | 3.00  | 散步  | 从不吸烟 |
| 149.00 | 59.00 | 84.00  | 26.58 | 不锻炼   |       |       |     | 从不吸烟 |
| 144.00 | 54.00 | 98.00  | 26.04 | 每天    | 30.00 | 7.00  | 散步  | 从不吸烟 |
| 162.00 | 55.20 | 86.00  | 21.03 | 每天    | 30.00 | 10.00 | 散步  | 从不吸烟 |
| 152.00 | 61.00 | 90.00  | 26.40 | 每天    | 60.00 | 11.00 | 散步  | 从不吸烟 |
| 156.00 | 65.00 | 105.00 | 26.71 | 每天    | 30.00 | 10.00 | 散步  | 从不吸烟 |
| 142.00 | 50.50 | 80.00  | 25.04 | 每天    | 45.00 | 21.00 | 散步  | 从不吸烟 |
| 151.50 | 46.70 | 75.00  | 20.35 | 每天    | 30.00 | 3.00  | 散步  | 从不吸烟 |
| 151.00 | 65.00 | 92.00  | 28.51 | 每天    | 30.00 | 6.00  | 散步  | 从不吸烟 |
| 143.00 | 50.00 | 88.00  | 24.45 | 每天    | 40.00 | 5.00  | 散步  | 从不吸烟 |
| 153.00 | 64.50 | 91.00  | 27.55 | 每天    | 60.00 | 2.00  | 散步  | 从不吸烟 |
| 158.00 | 52.00 | 78.00  | 20.83 | 不锻炼   |       |       |     | 从不吸烟 |
| 142.00 | 35.00 | 58.00  | 17.36 | 不锻炼   |       |       |     | 从不吸烟 |
| 144.00 | 61.00 | 102.00 | 29.42 | 不锻炼   |       |       |     | 从不吸烟 |
| 160.00 | 56.60 | 84.00  | 22.11 | 每天    | 60.00 | 10.00 | 散步  | 从不吸烟 |
| 153.00 | 51.00 | 78.00  | 21.79 | 每天    | 30.00 | 4.00  | 散步  | 从不吸烟 |
| 148.00 | 51.00 | 87.00  | 23.28 | 不锻炼   |       |       |     | 从不吸烟 |
| 152.00 | 57.00 | 86.00  | 24.67 | 不锻炼   |       |       |     | 从不吸烟 |
| 161.00 | 48.00 | 70.00  | 18.52 | 不锻炼   |       |       |     | 从不吸烟 |
| 142.00 | 48.00 | 86.00  | 23.80 | 每天    | 48.00 | 10.00 | 散步  | 从不吸烟 |
| 156.50 | 57.20 | 98.00  | 23.35 | 每天    | 60.00 | 2.00  | 散步  | 从不吸烟 |
| 147.00 | 64.00 | 85.00  | 29.62 | 每天    | 30.00 | 10.00 | 散步  | 从不吸烟 |
| 148.00 | 56.00 | 88.00  | 25.57 | 不锻炼   |       |       |     | 从不吸烟 |
| 154.00 | 90.00 | 108.00 | 37.95 | 每天    | 60.00 | 10.00 | 散步  | 从不吸烟 |
| 145.00 | 45.10 | 80.00  | 21.45 | 不锻炼   |       |       |     | 从不吸烟 |
| 160.00 | 68.00 | 83.00  | 26.56 | 每天    | 30.00 | 7.00  | 散步  | 从不吸烟 |
| 140.50 | 47.50 | 89.00  | 24.06 | 不锻炼   |       |       |     | 从不吸烟 |
| 157.00 | 55.00 | 86.00  | 22.31 | 每天    | 60.00 | 3.00  | 广播操 | 从不吸烟 |
| 150.00 | 60.00 | 83.00  | 26.67 | 不锻炼   |       |       |     | 从不吸烟 |
| 153.00 | 52.00 | 84.00  | 22.21 | 每天    | 30.00 | 10.00 | 散步  | 从不吸烟 |
| 155.00 | 73.00 | 92.00  | 30.39 | 每天    | 60.00 | 3.00  | 散步  | 从不吸烟 |
| 155.00 | 64.00 | 90.00  | 26.64 | 每天    | 30.00 | 3.00  | 散步  | 从不吸烟 |
| 142.50 | 50.10 | 85.00  | 24.67 | 不锻炼   |       |       |     | 从不吸烟 |
| 154.50 | 59.00 | 85.00  | 24.72 | 每天    | 30.00 | 4.00  | 散步  | 从不吸烟 |
| 154.00 | 63.00 | 92.00  | 26.56 | 每周一次! | 30.00 | 1.00  | 散步  | 从不吸烟 |
| 155.00 | 68.00 | 90.00  | 28.30 | 每天    | 30.00 | 3.00  | 散步  | 从不吸烟 |
| 162.00 | 58.00 | 84.00  | 22.10 | 每天    | 60.00 | 10.00 | 散步  | 从不吸烟 |
| 148.00 | 41.00 | 71.00  | 18.72 | 不锻炼   |       |       |     | 从不吸烟 |
| 149.00 | 59.00 | 87.00  | 26.58 | 不锻炼   |       |       |     | 从不吸烟 |
| 155.00 | 56.10 | 93.00  | 23.35 | 不锻炼   |       |       |     | 从不吸烟 |
| 145.00 | 56.00 | 90.00  | 26.63 | 每天    | 30.00 | 1.00  | 散步  | 从不吸烟 |

|        |       |        |       |       |       |       |    |      |
|--------|-------|--------|-------|-------|-------|-------|----|------|
| 149.00 | 61.00 | 78.00  | 27.48 | 不锻炼   |       |       |    | 从不吸烟 |
| 151.00 | 64.00 | 90.00  | 28.07 | 每天    | 30.00 | 3.00  | 散步 | 从不吸烟 |
| 164.00 | 59.30 | 94.00  | 22.05 | 每天    | 60.00 | 10.00 | 散步 | 从不吸烟 |
| 161.00 | 54.00 | 82.00  | 20.83 | 每天    | 30.00 | 10.00 | 散步 | 从不吸烟 |
| 156.00 | 50.00 | 89.00  | 20.55 | 每天    | 40.00 | 3.00  | 散步 | 从不吸烟 |
| 155.00 | 58.00 | 87.00  | 24.14 | 每天    | 30.00 | 3.00  | 散步 | 从不吸烟 |
| 169.00 | 70.00 | 91.00  | 24.51 | 每周一次↓ | 30.00 | 2.00  | 散步 | 从不吸烟 |
| 153.00 | 49.00 | 78.00  | 20.93 | 不锻炼   |       |       |    | 从不吸烟 |
| 149.00 | 50.85 | 80.00  | 22.90 | 每天    | 60.00 | 10.00 | 散步 | 从不吸烟 |
| 157.50 | 49.00 | 81.00  | 19.75 | 每天    | 60.00 | 7.00  | 散步 | 从不吸烟 |
| 156.00 | 63.50 | 87.00  | 26.09 | 不锻炼   |       |       |    | 从不吸烟 |
| 153.00 | 47.00 | 80.00  | 20.08 | 不锻炼   |       |       |    | 从不吸烟 |
| 150.00 | 54.00 | 76.00  | 24.00 | 不锻炼   |       |       |    | 从不吸烟 |
| 152.00 | 65.00 | 95.00  | 28.13 | 每周一次↓ | 30.00 | 1.00  | 散步 | 从不吸烟 |
| 156.00 | 70.00 | 87.00  | 28.76 | 每天    | 30.00 | 10.00 | 散步 | 从不吸烟 |
| 153.50 | 57.00 | 78.00  | 24.19 | 每天    | 60.00 | 6.00  | 散步 | 从不吸烟 |
| 163.00 | 84.00 | 91.00  | 31.62 | 每天    | 60.00 | 15.00 | 散步 | 从不吸烟 |
| 151.00 | 50.50 | 78.00  | 22.15 | 每天    | 60.00 | 2.00  | 散步 | 从不吸烟 |
| 142.00 | 47.00 | 82.00  | 23.31 | 不锻炼   |       |       |    | 从不吸烟 |
| 152.00 | 47.00 | 78.00  | 20.34 | 每天    | 60.00 | 3.00  | 散步 | 从不吸烟 |
| 148.00 | 44.00 | 76.00  | 20.09 | 每天    | 60.00 | 6.00  | 散步 | 从不吸烟 |
| 150.00 | 48.00 | 89.00  | 21.33 | 每天    | 20.00 | 2.00  | 散步 | 从不吸烟 |
| 153.00 | 63.00 | 86.00  | 26.91 | 每天    | 20.00 | 5.00  | 散步 | 从不吸烟 |
| 156.00 | 73.10 | 99.00  | 30.04 | 每天    | 60.00 | 3.00  | 散步 | 从不吸烟 |
| 153.00 | 61.70 | 93.00  | 26.36 | 每天    | 60.00 | 6.00  | 散步 | 从不吸烟 |
| 149.00 | 50.80 | 78.00  | 22.88 | 每天    | 30.00 | 10.00 | 散步 | 从不吸烟 |
| 153.00 | 60.00 | 93.00  | 25.63 | 每天    | 20.00 | 4.00  | 散步 | 从不吸烟 |
| 149.00 | 54.00 | 89.00  | 24.32 | 不锻炼   |       |       |    | 从不吸烟 |
| 148.00 | 52.00 | 94.00  | 23.74 | 不锻炼   |       |       |    | 从不吸烟 |
| 139.00 | 55.00 | 86.00  | 28.47 | 每周一次↓ | 30.00 | 1.00  | 散步 | 从不吸烟 |
| 149.00 | 65.00 | 98.00  | 29.28 | 不锻炼   |       |       |    | 从不吸烟 |
| 149.00 | 68.00 | 93.00  | 30.63 | 每天    | 60.00 | 6.00  | 散步 | 从不吸烟 |
| 153.50 | 54.90 | 86.00  | 23.30 | 每天    | 60.00 | 10.00 | 散步 | 从不吸烟 |
| 150.00 | 58.00 | 87.00  | 25.78 | 不锻炼   |       |       |    | 从不吸烟 |
| 160.00 | 69.50 | 95.00  | 27.15 | 每天    | 30.00 | 1.00  | 散步 | 从不吸烟 |
| 154.00 | 60.00 | 93.00  | 25.30 | 不锻炼   |       |       |    | 从不吸烟 |
| 148.00 | 59.00 | 89.00  | 26.94 | 每天    | 60.00 | 2.00  | 散步 | 从不吸烟 |
| 151.00 | 61.00 | 89.00  | 26.75 | 每天    | 60.00 | 6.00  | 散步 | 从不吸烟 |
| 143.00 | 59.00 | 91.00  | 28.85 | 每周一次↓ | 30.00 | 1.00  | 散步 | 从不吸烟 |
| 150.00 | 47.00 | 84.00  | 20.89 | 每天    | 30.00 | 1.00  | 散步 | 从不吸烟 |
| 142.00 | 53.00 | 82.00  | 26.28 | 每天    | 60.00 | 1.00  | 散步 | 从不吸烟 |
| 146.00 | 58.00 | 81.00  | 27.21 | 每天    | 30.00 | 1.00  | 散步 | 从不吸烟 |
| 163.00 | 73.00 | 98.00  | 27.48 | 每天    | 60.00 | 2.00  | 散步 | 从不吸烟 |
| 167.00 | 76.00 | 98.00  | 27.25 | 每天    | 30.00 | 2.00  | 散步 | 从不吸烟 |
| 147.00 | 47.50 | 75.00  | 21.98 | 每天    | 30.00 | 2.00  | 散步 | 从不吸烟 |
| 154.00 | 52.00 | 85.00  | 21.93 | 不锻炼   |       |       |    | 从不吸烟 |
| 144.00 | 46.00 | 91.00  | 22.18 | 每天    | 30.00 | 2.00  | 散步 | 从不吸烟 |
| 146.00 | 57.00 | 88.00  | 26.74 | 每天    | 15.00 | 3.00  | 散步 | 从不吸烟 |
| 151.00 | 51.00 | 81.00  | 22.37 | 不锻炼   |       |       |    | 从不吸烟 |
| 151.00 | 59.00 | 80.00  | 25.88 | 不锻炼   |       |       |    | 从不吸烟 |
| 156.50 | 76.00 | 102.00 | 31.03 | 每天    | 60.00 | 4.00  | 散步 | 从不吸烟 |

|        |       |        |       |       |       |       |       |      |
|--------|-------|--------|-------|-------|-------|-------|-------|------|
| 168.50 | 73.30 | 102.00 | 25.82 | 不锻炼   |       |       |       | 从不吸烟 |
| 147.00 | 56.50 | 94.00  | 26.15 | 每天    | 60.00 | 4.00  | 散步    | 从不吸烟 |
| 152.00 | 67.00 | 90.00  | 29.00 | 每周一次! | 30.00 | 1.00  | 散步    | 从不吸烟 |
| 151.00 | 73.00 | 96.00  | 32.02 | 每天    | 30.00 | 10.00 | 散步    | 从不吸烟 |
| 146.00 | 44.00 | 69.00  | 20.64 | 每天    | 30.00 | 12.00 | 散步    | 从不吸烟 |
| 151.00 | 45.40 | 73.00  | 19.91 | 每天    | 30.00 | 2.00  | 散步    | 从不吸烟 |
| 161.00 | 71.00 | 96.00  | 27.39 | 每天    | 60.00 | 4.00  | 散步    | 从不吸烟 |
| 149.00 | 48.10 | 78.00  | 21.67 | 不锻炼   |       |       |       | 从不吸烟 |
| 158.00 | 60.00 | 87.00  | 24.03 | 每天    | 30.00 | 1.00  | 散步    | 从不吸烟 |
| 151.00 | 47.50 | 77.00  | 20.83 | 每天    | 60.00 | 12.00 | 散步    | 从不吸烟 |
| 146.00 | 47.50 | 92.00  | 22.28 | 每天    | 30.00 | 5.00  | 散步    | 从不吸烟 |
| 147.00 | 54.00 | 86.00  | 24.99 | 每天    | 30.00 | 10.00 | 散步    | 从不吸烟 |
| 151.00 | 53.00 | 87.00  | 23.24 | 不锻炼   |       |       |       | 从不吸烟 |
| 142.00 | 52.30 | 90.00  | 25.94 | 不锻炼   |       |       |       | 从不吸烟 |
| 154.50 | 60.00 | 87.00  | 25.14 | 每天    | 30.00 | 10.00 | 散步    | 从不吸烟 |
| 141.00 | 50.50 | 88.00  | 25.40 | 每天    | 30.00 | 1.00  | 散步    | 从不吸烟 |
| 152.00 | 51.80 | 81.00  | 22.42 | 每天    | 30.00 | 15.00 | 散步    | 从不吸烟 |
| 153.00 | 67.10 | 94.00  | 28.66 | 不锻炼   |       |       |       | 从不吸烟 |
| 150.00 | 61.00 | 95.00  | 27.11 | 不锻炼   |       |       |       | 从不吸烟 |
| 161.00 | 53.00 | 83.00  | 20.45 | 每天    | 60.00 | 4.00  | 散步    | 从不吸烟 |
| 152.00 | 51.00 | 75.00  | 22.07 | 每天    | 30.00 | 1.00  | 散步    | 从不吸烟 |
| 145.00 | 53.00 | 87.00  | 25.21 | 不锻炼   |       |       |       | 从不吸烟 |
| 157.50 | 58.00 | 86.00  | 23.38 | 每天    | 30.00 | 10.00 | 散步    | 从不吸烟 |
| 154.00 | 53.50 | 87.00  | 22.56 | 不锻炼   |       |       |       | 从不吸烟 |
| 148.00 | 42.00 | 80.00  | 19.17 | 不锻炼   |       |       |       | 从不吸烟 |
| 155.00 | 76.00 | 107.00 | 31.63 | 每天    | 30.00 | 2.00  | 散步    | 从不吸烟 |
| 150.50 | 60.60 | 99.00  | 26.75 | 每天    | 60.00 | 5.00  | 散步    | 从不吸烟 |
| 143.00 | 52.00 | 91.00  | 25.43 | 每天    | 60.00 | 7.00  | 散步    | 从不吸烟 |
| 148.00 | 50.00 | 79.00  | 22.83 | 每周一次! | 30.00 | 2.00  | 散步    | 从不吸烟 |
| 147.00 | 52.00 | 80.00  | 24.06 | 每天    | 30.00 | 10.00 | 散步    | 从不吸烟 |
| 152.00 | 52.00 | 75.00  | 22.51 | 每天    | 30.00 | 10.00 | 散步    | 从不吸烟 |
| 161.00 | 58.00 | 83.00  | 22.38 | 每天    | 40.00 | 6.00  | 散步    | 从不吸烟 |
| 153.00 | 51.00 | 84.00  | 21.79 | 每天    | 20.00 | 20.00 | 散步, 打 | 从不吸烟 |
| 149.00 | 59.00 | 82.00  | 26.58 | 每天    | 60.00 | 16.00 | 散步    | 从不吸烟 |
| 155.00 | 75.00 | 101.00 | 31.22 | 每天    | 30.00 | 3.00  | 散步    | 从不吸烟 |
| 141.00 | 50.00 | 88.00  | 25.15 | 每天    | 30.00 | 2.00  | 散步    | 从不吸烟 |
| 148.50 | 55.00 | 75.00  | 24.94 | 每天    | 60.00 | 4.00  | 散步    | 从不吸烟 |
| 155.00 | 61.50 | 89.00  | 25.60 | 不锻炼   |       |       |       | 从不吸烟 |
| 144.00 | 42.00 | 67.00  | 20.25 | 每天    | 60.00 | 4.00  | 散步    | 从不吸烟 |
| 150.00 | 55.50 | 88.00  | 24.67 | 每天    | 30.00 | 4.00  | 散步    | 从不吸烟 |
| 153.00 | 55.00 | 87.00  | 23.50 | 每天    | 30.00 | 12.00 | 散步    | 从不吸烟 |
| 147.00 | 60.00 | 90.00  | 27.77 | 每天    | 30.00 | 5.00  | 散步    | 从不吸烟 |
| 149.50 | 41.00 | 62.50  | 18.34 | 不锻炼   |       |       |       | 从不吸烟 |
| 136.00 | 30.00 | 66.00  | 16.22 | 每周一次! | 10.00 | 1.00  | 散步    | 从不吸烟 |
| 160.00 | 73.00 | 96.00  | 28.52 | 每天    | 60.00 | 10.00 | 散步    | 从不吸烟 |
| 157.00 | 76.00 | 102.00 | 30.83 | 不锻炼   |       |       |       | 从不吸烟 |
| 157.00 | 64.10 | 97.00  | 26.01 | 每天    | 30.00 | 1.00  | 散步    | 从不吸烟 |
| 157.00 | 63.00 | 89.00  | 25.56 | 每天    | 30.00 | 5.00  | 散步    | 从不吸烟 |
| 147.00 | 69.00 | 102.00 | 31.93 | 不锻炼   |       |       |       | 从不吸烟 |
| 143.00 | 47.00 | 86.00  | 22.98 | 每天    | 30.00 | 11.00 | 散步    | 从不吸烟 |
| 155.00 | 52.50 | 78.00  | 21.85 | 每天    | 60.00 | 12.00 | 散步    | 从不吸烟 |

|        |       |        |       |       |        |       |      |      |
|--------|-------|--------|-------|-------|--------|-------|------|------|
| 154.00 | 57.00 | 86.00  | 24.03 | 每天    | 60.00  | 3.00  | 散步   | 从不吸烟 |
| 147.50 | 58.00 | 93.00  | 26.66 | 每天    | 30.00  | 2.00  | 散步   | 从不吸烟 |
| 147.00 | 51.50 | 89.00  | 23.83 | 每天    | 60.00  | 1.00  | 散步   | 从不吸烟 |
| 141.00 | 42.90 | 83.00  | 21.58 | 每天    | 60.00  | 20.00 | 散步   | 从不吸烟 |
| 137.00 | 47.00 | 92.00  | 25.04 | 每天    | 30.00  | 4.00  | 散步   | 从不吸烟 |
| 147.00 | 66.00 | 93.00  | 30.54 | 每天    | 30.00  | 12.00 | 散步   | 从不吸烟 |
| 152.00 | 63.00 | 91.00  | 27.27 | 每天    | 30.00  | 3.00  | 散步   | 从不吸烟 |
| 145.00 | 53.00 | 82.00  | 25.21 | 每天    | 30.00  | 10.00 | 散步   | 从不吸烟 |
| 146.00 | 63.00 | 94.00  | 29.56 | 每天    | 60.00  | 6.00  | 散步   | 从不吸烟 |
| 153.00 | 55.50 | 83.00  | 23.71 | 不锻炼   |        |       |      | 从不吸烟 |
| 148.00 | 47.00 | 71.00  | 21.46 | 不锻炼   |        |       |      | 从不吸烟 |
| 148.00 | 54.00 | 94.00  | 24.65 | 每天    | 60.00  | 1.00  | 散步   | 从不吸烟 |
| 150.00 | 53.00 | 92.00  | 23.56 | 每天    | 30.00  | 3.00  | 散步   | 从不吸烟 |
| 165.00 | 77.00 | 98.00  | 28.28 | 每天    | 30.00  | 3.00  | 散步   | 从不吸烟 |
| 156.00 | 50.00 | 74.00  | 20.55 | 不锻炼   |        |       |      | 从不吸烟 |
| 152.00 | 68.00 | 103.00 | 29.43 | 每天    | 30.00  | 11.00 | 散步   | 从不吸烟 |
| 143.00 | 54.00 | 88.00  | 26.41 | 每天    | 60.00  | 1.00  | 散步   | 从不吸烟 |
| 157.10 | 71.20 | 96.00  | 28.85 | 不锻炼   |        |       |      | 从不吸烟 |
| 151.00 | 59.00 | 98.00  | 25.88 | 每天    | 60.00  | 1.00  | 做操   | 从不吸烟 |
| 149.00 | 64.00 | 91.00  | 28.83 | 每天    | 60.00  | 10.00 | 散步   | 从不吸烟 |
| 147.00 | 41.00 | 62.00  | 18.97 | 每天    | 120.00 | 2.00  | 散步   | 从不吸烟 |
| 163.00 | 65.00 | 85.00  | 24.46 | 每天    | 30.00  | 2.00  | 散步   | 从不吸烟 |
| 153.00 | 58.00 | 71.00  | 24.78 | 每天    | 60.00  | 1.00  | 散步   | 从不吸烟 |
| 147.00 | 46.50 | 78.00  | 21.52 | 每天    | 60.00  | 10.00 | 散步   | 从不吸烟 |
| 156.00 | 59.00 | 85.00  | 24.24 | 每天    | 60.00  | 11.00 | 跳舞、打 | 从不吸烟 |
| 146.00 | 50.00 | 86.00  | 23.46 | 每天    | 60.00  | 4.00  | 散步   | 从不吸烟 |
| 150.00 | 55.50 | 82.00  | 24.67 | 不锻炼   |        |       |      | 从不吸烟 |
| 139.00 | 43.00 | 69.00  | 22.26 | 不锻炼   |        |       |      | 从不吸烟 |
| 154.00 | 52.00 | 82.00  | 21.93 | 每天    | 30.00  | 2.00  | 散步   | 从不吸烟 |
| 152.00 | 63.80 | 90.00  | 27.61 | 每天    | 30.00  | 6.00  | 散步   | 从不吸烟 |
| 153.00 | 53.40 | 80.00  | 22.81 | 不锻炼   |        |       |      | 从不吸烟 |
| 156.00 | 61.00 | 87.00  | 25.07 | 每天    | 30.00  | 2.00  | 散步   | 从不吸烟 |
| 158.00 | 62.00 | 90.00  | 24.84 | 每周一次! | 20.00  | 1.00  | 散步   | 从不吸烟 |
| 141.50 | 42.90 | 87.00  | 21.43 | 每天    | 30.00  | 5.00  | 散步   | 从不吸烟 |
| 153.00 | 71.50 | 98.00  | 30.54 | 每天    | 30.00  | 1.00  | 散步   | 从不吸烟 |
| 142.00 | 40.00 | 68.00  | 19.84 | 每天    | 30.00  | 5.00  | 散步   | 从不吸烟 |
| 147.00 | 52.00 | 72.00  | 24.06 | 每天    | 30.00  | 3.00  | 散步   | 从不吸烟 |
| 164.00 | 64.00 | 85.00  | 23.80 | 每天    | 30.00  | 2.00  | 散步   | 从不吸烟 |
| 151.00 | 65.00 | 92.00  | 28.51 | 不锻炼   |        |       |      | 从不吸烟 |
| 149.00 | 41.50 | 66.00  | 18.69 | 每天    | 30.00  | 7.00  | 散步   | 从不吸烟 |
| 155.00 | 51.00 | 90.00  | 21.23 | 偶尔    | 30.00  | 1.00  | 散步   | 从不吸烟 |
| 152.00 | 66.00 | 91.00  | 28.57 | 每天    | 30.00  | 5.00  | 散步   | 从不吸烟 |
| 146.00 | 49.90 | 86.00  | 23.41 | 每天    | 60.00  | 7.00  | 散步   | 从不吸烟 |
| 149.00 | 51.80 | 78.00  | 23.33 | 每天    | 60.00  | 4.00  | 散步   | 从不吸烟 |
| 144.00 | 56.00 | 78.00  | 27.01 | 每周一次! | 30.00  | 3.00  | 散步   | 从不吸烟 |
| 146.00 | 52.00 | 87.00  | 24.39 | 不锻炼   |        |       |      | 从不吸烟 |
| 145.00 | 45.00 | 87.00  | 21.40 | 不锻炼   |        |       |      | 从不吸烟 |
| 153.00 | 59.00 | 94.00  | 25.20 | 每周一次! | 30.00  | 1.00  | 散步   | 从不吸烟 |
| 148.00 | 44.50 | 74.00  | 20.32 | 每天    | 60.00  | 12.00 | 散步   | 从不吸烟 |
| 150.00 | 49.00 | 95.00  | 21.78 | 不锻炼   |        |       |      | 从不吸烟 |
| 158.00 | 52.00 | 80.00  | 20.83 | 每天    | 30.00  | 1.00  | 散步   | 从不吸烟 |

|        |       |        |       |       |       |       |    |      |
|--------|-------|--------|-------|-------|-------|-------|----|------|
| 154.50 | 50.00 | 80.00  | 20.95 | 每天    | 60.00 | 9.00  | 散步 | 从不吸烟 |
| 144.00 | 62.00 | 92.00  | 29.90 | 每天    | 30.00 | 3.00  | 散步 | 从不吸烟 |
| 143.50 | 48.30 | 81.00  | 23.46 | 每天    | 30.00 | 5.00  | 散步 | 从不吸烟 |
| 154.00 | 56.20 | 88.00  | 23.70 | 每天    | 30.00 | 10.00 | 散步 | 从不吸烟 |
| 147.00 | 53.00 | 88.00  | 24.53 | 每天    | 30.00 | 11.00 | 散步 | 从不吸烟 |
| 151.00 | 48.10 | 82.00  | 21.10 | 不锻炼   |       |       |    | 从不吸烟 |
| 153.00 | 65.00 | 86.00  | 27.77 | 每天    | 60.00 | 11.00 | 散步 | 从不吸烟 |
| 156.00 | 58.00 | 87.00  | 23.83 | 每天    | 60.00 | 3.00  | 散步 | 从不吸烟 |
| 162.00 | 64.50 | 89.00  | 24.58 | 每周一次! | 30.00 | 3.00  | 散步 | 从不吸烟 |
| 152.00 | 55.00 | 87.00  | 23.81 | 每天    | 30.00 | 1.00  | 散步 | 从不吸烟 |
| 147.00 | 45.00 | 77.00  | 20.82 | 每天    | 30.00 | 2.00  | 散步 | 从不吸烟 |
| 159.00 | 63.00 | 90.00  | 24.92 | 不锻炼   |       |       |    | 从不吸烟 |
| 152.50 | 75.00 | 100.00 | 32.25 | 每天    | 30.00 | 3.00  | 散步 | 从不吸烟 |
| 145.00 | 58.00 | 88.00  | 27.59 | 每天    | 20.00 | 3.00  | 散步 | 从不吸烟 |
| 154.00 | 59.00 | 83.00  | 24.88 | 不锻炼   |       |       |    | 从不吸烟 |
| 143.00 | 46.00 | 80.00  | 22.49 | 每天    | 30.00 | 3.00  | 散步 | 从不吸烟 |
| 141.00 | 39.00 | 58.00  | 19.62 | 每天    | 30.00 | 5.00  | 散步 | 从不吸烟 |
| 156.00 | 61.00 | 89.00  | 25.07 | 每天    | 60.00 | 2.00  | 跳舞 | 从不吸烟 |
| 143.00 | 38.00 | 66.00  | 18.58 | 每天    | 30.00 | 1.00  | 散步 | 从不吸烟 |
| 145.00 | 60.00 | 90.00  | 28.54 | 不锻炼   |       |       |    | 从不吸烟 |
| 160.00 | 68.00 | 93.00  | 26.56 | 每天    | 60.00 | 12.00 | 散步 | 从不吸烟 |
| 147.00 | 46.00 | 76.00  | 21.29 | 每天    | 30.00 | 10.00 | 散步 | 从不吸烟 |
| 144.50 | 40.50 | 66.00  | 19.40 | 不锻炼   |       |       |    | 从不吸烟 |
| 147.00 | 47.50 | 81.00  | 21.98 | 每天    | 30.00 | 5.00  | 散步 | 从不吸烟 |
| 141.00 | 52.00 | 83.00  | 26.16 | 不锻炼   |       |       |    | 从不吸烟 |
| 153.00 | 61.00 | 86.00  | 26.06 | 每天    | 60.00 | 3.00  | 散步 | 从不吸烟 |
| 144.00 | 56.00 | 91.00  | 27.01 | 每天    | 60.00 | 17.00 | 散步 | 从不吸烟 |
| 154.00 | 70.00 | 109.00 | 29.52 | 每天    | 30.00 | 6.00  | 散步 | 从不吸烟 |
| 158.00 | 58.00 | 88.00  | 23.23 | 每天    | 30.00 | 5.00  | 散步 | 从不吸烟 |
| 160.50 | 62.40 | 88.00  | 24.22 | 每天    | 30.00 | 2.00  | 散步 | 从不吸烟 |
| 138.00 | 45.00 | 71.00  | 23.63 | 每周一次! | 30.00 | 1.00  | 散步 | 从不吸烟 |
| 154.00 | 49.00 | 81.00  | 20.66 | 每天    | 30.00 | 2.00  | 散步 | 从不吸烟 |
| 146.00 | 44.00 | 86.00  | 20.64 | 每天    | 30.00 | 4.00  | 散步 | 从不吸烟 |
| 154.00 | 47.00 | 70.00  | 19.82 | 每天    | 30.00 | 3.00  | 散步 | 从不吸烟 |
| 156.00 | 63.00 | 83.00  | 25.89 | 每天    | 30.00 | 10.00 | 散步 | 从不吸烟 |
| 154.00 | 50.00 | 76.00  | 21.08 | 不锻炼   |       |       |    | 从不吸烟 |
| 167.00 | 78.00 | 92.00  | 27.97 | 每天    | 30.00 | 4.00  | 散步 | 从不吸烟 |
| 152.00 | 62.00 | 92.00  | 26.84 | 不锻炼   |       |       |    | 从不吸烟 |
| 140.00 | 58.50 | 87.00  | 29.85 | 每天    | 60.00 | 6.00  | 散步 | 从不吸烟 |
| 165.00 | 57.00 | 76.00  | 20.94 | 每周一次! | 30.00 | 1.00  | 散步 | 从不吸烟 |
| 149.00 | 55.40 | 91.00  | 24.95 | 不锻炼   |       |       |    | 从不吸烟 |
| 148.00 | 55.00 | 80.00  | 25.11 | 每天    | 30.00 | 3.00  | 散步 | 从不吸烟 |
| 154.00 | 64.00 | 92.00  | 26.99 | 每天    | 30.00 | 4.00  | 散步 | 从不吸烟 |
| 152.50 | 51.00 | 76.00  | 21.93 | 不锻炼   |       |       |    | 从不吸烟 |
| 143.00 | 52.50 | 93.00  | 25.67 | 每天    | 30.00 | 2.00  | 散步 | 从不吸烟 |
| 162.00 | 72.00 | 90.00  | 27.43 | 每天    | 30.00 | 10.00 | 散步 | 从不吸烟 |
| 152.00 | 60.50 | 97.00  | 26.19 | 每天    | 60.00 | 3.00  | 散步 | 从不吸烟 |
| 154.00 | 64.00 | 87.00  | 26.99 | 每天    | 30.00 | 1.00  | 散步 | 从不吸烟 |
| 158.00 | 47.00 | 73.00  | 18.83 | 每天    | 60.00 | 5.00  | 散步 | 从不吸烟 |
| 147.50 | 50.50 | 85.00  | 23.21 | 每天    | 30.00 | 2.00  | 散步 | 从不吸烟 |
| 159.00 | 63.00 | 85.00  | 24.92 | 每天    | 30.00 | 10.00 | 散步 | 从不吸烟 |

|        |       |        |       |       |        |       |     |      |
|--------|-------|--------|-------|-------|--------|-------|-----|------|
| 146.00 | 48.00 | 80.00  | 22.52 | 每周一次↓ | 20.00  | 1.00  | 散步  | 从不吸烟 |
| 156.00 | 66.00 | 96.00  | 27.12 | 每天    | 60.00  | 2.00  | 跳舞  | 从不吸烟 |
| 155.00 | 60.00 | 92.00  | 24.97 | 每天    | 30.00  | 11.00 | 散步  | 从不吸烟 |
| 155.00 | 62.00 | 99.00  | 25.81 | 每天    | 30.00  | 2.00  | 散步  | 从不吸烟 |
| 155.00 | 65.50 | 92.00  | 27.26 | 不锻炼   |        |       |     | 从不吸烟 |
| 150.00 | 41.00 | 79.00  | 18.22 | 不锻炼   |        |       |     | 从不吸烟 |
| 149.00 | 56.00 | 76.00  | 25.22 | 每天    | 30.00  | 10.00 | 散步  | 从不吸烟 |
| 156.00 | 51.80 | 75.00  | 21.29 | 每周一次↓ | 30.00  | 2.00  | 散步  | 从不吸烟 |
| 157.00 | 61.30 | 81.00  | 24.87 | 不锻炼   |        |       |     | 从不吸烟 |
| 152.00 | 42.00 | 70.00  | 18.18 | 每周一次↓ | 30.00  | 3.00  | 散步  | 从不吸烟 |
| 158.00 | 61.80 | 90.00  | 24.76 | 每天    | 60.00  | 7.00  | 散步  | 从不吸烟 |
| 153.00 | 60.00 | 89.00  | 25.63 | 每天    | 30.00  | 3.00  | 散步  | 从不吸烟 |
| 152.00 | 68.00 | 95.00  | 29.43 | 每周一次↓ | 20.00  | 2.00  | 散步  | 从不吸烟 |
| 156.00 | 65.00 | 82.00  | 26.71 | 每周一次↓ | 30.00  | 1.00  | 散步  | 从不吸烟 |
| 152.00 | 50.00 | 68.00  | 21.64 | 每天    | 30.00  | 1.00  | 散步  | 从不吸烟 |
| 156.00 | 63.00 | 90.00  | 25.89 | 每天    | 60.00  | 11.00 | 散步  | 从不吸烟 |
| 151.00 | 47.00 | 88.00  | 20.61 | 不锻炼   |        |       |     | 从不吸烟 |
| 146.00 | 58.00 | 96.00  | 27.21 | 不锻炼   |        |       |     | 从不吸烟 |
| 155.00 | 80.00 | 106.00 | 33.30 | 每天    | 30.00  | 2.00  | 散步  | 从不吸烟 |
| 148.00 | 54.00 | 75.00  | 24.65 | 每天    | 30.00  | 8.00  | 做操  | 从不吸烟 |
| 145.00 | 54.00 | 87.00  | 25.68 | 不锻炼   |        |       |     | 从不吸烟 |
| 147.00 | 68.50 | 106.00 | 31.70 | 每天    | 60.00  | 6.00  | 散步  | 从不吸烟 |
| 153.00 | 62.00 | 89.00  | 26.49 | 每天    | 120.00 | 10.00 | 打太极 | 从不吸烟 |
| 143.00 | 49.00 | 86.00  | 23.96 | 每周一次↓ | 30.00  | 1.00  | 散步  | 从不吸烟 |
| 156.00 | 52.40 | 78.00  | 21.53 | 每天    | 30.00  | 11.00 | 散步  | 从不吸烟 |
| 156.00 | 62.00 | 96.00  | 25.48 | 每天    | 30.00  | 6.00  | 散步  | 从不吸烟 |
| 156.00 | 56.00 | 79.00  | 23.01 | 不锻炼   |        |       |     | 从不吸烟 |
| 147.00 | 52.00 | 85.00  | 24.06 | 不锻炼   |        |       |     | 从不吸烟 |
| 151.00 | 59.00 | 92.00  | 25.88 | 不锻炼   |        |       |     | 从不吸烟 |
| 157.00 | 70.00 | 95.00  | 28.40 | 每天    | 20.00  | 7.00  | 散步  | 从不吸烟 |
| 155.00 | 54.40 | 90.00  | 22.64 | 每天    | 30.00  | 5.00  | 散步  | 从不吸烟 |
| 153.00 | 53.00 | 90.00  | 22.64 | 不锻炼   |        |       |     | 从不吸烟 |
| 153.00 | 54.00 | 86.00  | 23.07 | 每天    | 30.00  | 20.00 | 散步  | 从不吸烟 |
| 148.50 | 64.90 | 100.00 | 29.43 | 每天    | 30.00  | 11.00 | 散步  | 从不吸烟 |
| 152.00 | 58.00 | 91.00  | 25.10 | 每天    | 60.00  | 6.00  | 散步  | 从不吸烟 |
| 155.00 | 65.90 | 92.00  | 27.43 | 每天    | 30.00  | 10.00 | 散步  | 从不吸烟 |
| 147.00 | 52.00 | 86.00  | 24.06 | 每天    | 30.00  | 1.00  | 散步  | 从不吸烟 |
| 134.00 | 41.00 | 76.00  | 22.83 | 不锻炼   |        |       |     | 从不吸烟 |
| 152.00 | 47.00 | 70.00  | 20.34 | 不锻炼   |        |       |     | 从不吸烟 |
| 155.00 | 64.80 | 86.00  | 26.97 | 每天    | 40.00  | 3.00  | 散步  | 从不吸烟 |
| 153.00 | 57.00 | 88.00  | 24.35 | 每周一次↓ | 20.00  | 3.00  | 散步  | 从不吸烟 |
| 148.00 | 48.50 | 76.00  | 22.14 | 每天    | 30.00  | 7.00  | 散步  | 从不吸烟 |
| 150.00 | 67.00 | 96.00  | 29.78 | 不锻炼   |        |       |     | 从不吸烟 |
| 158.00 | 56.00 | 87.00  | 22.43 | 不锻炼   |        |       |     | 从不吸烟 |
| 154.00 | 50.50 | 79.00  | 21.29 | 不锻炼   |        |       |     | 从不吸烟 |
| 145.00 | 52.00 | 91.00  | 24.73 | 每周一次↓ | 60.00  | 3.00  | 散步  | 从不吸烟 |
| 152.00 | 61.00 | 94.00  | 26.40 | 每天    | 30.00  | 2.00  | 散步  | 从不吸烟 |
| 147.00 | 50.00 | 83.00  | 23.14 | 每天    | 30.00  | 10.00 | 散步  | 从不吸烟 |
| 161.00 | 71.00 | 102.00 | 27.39 | 每天    | 30.00  | 1.00  | 早操  | 从不吸烟 |
| 145.00 | 37.00 | 67.00  | 17.60 | 不锻炼   |        |       |     | 从不吸烟 |
| 137.00 | 39.00 | 77.00  | 20.78 | 每天    | 30.00  | 12.00 | 散步  | 从不吸烟 |

|        |       |        |       |       |       |       |       |      |
|--------|-------|--------|-------|-------|-------|-------|-------|------|
| 149.00 | 66.00 | 92.00  | 29.73 | 不锻炼   |       |       |       | 从不吸烟 |
| 153.00 | 61.00 | 91.00  | 26.06 | 每天    | 30.00 | 1.00  | 散步、做操 | 从不吸烟 |
| 150.00 | 51.00 | 73.00  | 22.67 | 每周一次! | 30.00 | 2.00  | 散步    | 从不吸烟 |
| 146.00 | 57.50 | 87.00  | 26.98 | 每天    | 20.00 | 1.00  | 散步    | 从不吸烟 |
| 155.00 | 57.30 | 84.00  | 23.85 | 每天    | 60.00 | 8.00  | 散步    | 从不吸烟 |
| 148.00 | 52.00 | 90.00  | 23.74 | 每天    | 60.00 | 5.00  | 散步    | 从不吸烟 |
| 153.00 | 48.00 | 73.00  | 20.50 | 每天    | 60.00 | 5.00  | 散步    | 从不吸烟 |
| 157.00 | 71.20 | 104.00 | 28.89 | 每天    | 20.00 | 1.00  | 散步    | 从不吸烟 |
| 153.00 | 58.00 | 78.00  | 24.78 | 每天    | 30.00 | 1.00  | 散步    | 从不吸烟 |
| 149.50 | 38.00 | 68.50  | 17.00 | 不锻炼   |       |       |       | 从不吸烟 |
| 150.00 | 62.00 | 90.00  | 27.56 | 每天    | 40.00 | 3.00  | 散步    | 从不吸烟 |
| 149.00 | 53.00 | 76.00  | 23.87 | 不锻炼   |       |       |       | 从不吸烟 |
| 154.00 | 63.00 | 92.00  | 26.56 | 不锻炼   |       |       |       | 从不吸烟 |
| 148.00 | 53.60 | 83.00  | 24.47 | 不锻炼   |       |       |       | 从不吸烟 |
| 153.00 | 49.30 | 79.00  | 21.06 | 每天    | 60.00 | 11.00 | 散步    | 从不吸烟 |
| 145.00 | 64.00 | 112.00 | 30.44 | 每周一次! | 30.00 | 1.00  | 散步    | 从不吸烟 |
| 150.50 | 50.00 | 85.00  | 22.07 | 不锻炼   |       |       |       | 从不吸烟 |
| 150.00 | 52.50 | 86.00  | 23.33 | 每天    | 30.00 | 9.00  | 散步    | 从不吸烟 |
| 150.00 | 60.00 | 93.00  | 26.67 | 每天    | 60.00 | 3.00  | 散步    | 从不吸烟 |
| 154.00 | 44.00 | 77.00  | 18.55 | 每天    | 30.00 | 2.00  | 散步    | 从不吸烟 |
| 150.00 | 54.00 | 82.00  | 24.00 | 每天    | 30.00 | 2.00  | 散步    | 从不吸烟 |
| 155.00 | 41.00 | 69.00  | 17.07 | 每天    | 30.00 | 2.00  | 散步    | 从不吸烟 |
| 154.00 | 62.00 | 87.00  | 26.14 | 每天    | 60.00 | 15.00 | 散步    | 从不吸烟 |
| 136.00 | 60.20 | 95.00  | 32.55 | 每天    | 60.00 | 3.00  | 散步    | 从不吸烟 |
| 146.50 | 57.50 | 82.00  | 26.79 | 不锻炼   |       |       |       | 从不吸烟 |
| 150.00 | 53.00 | 71.00  | 23.56 | 每天    | 60.00 | 13.00 | 散步    | 从不吸烟 |
| 153.00 | 58.00 | 86.00  | 24.78 | 每天    | 60.00 | 4.00  | 散步    | 从不吸烟 |
| 148.00 | 40.00 | 78.00  | 18.26 | 每天    | 60.00 | 5.00  | 散步    | 从不吸烟 |
| 151.00 | 41.00 | 65.00  | 17.98 | 不锻炼   |       |       |       | 从不吸烟 |
| 162.00 | 70.00 | 98.00  | 26.67 | 每天    | 30.00 | 1.00  | 散步    | 从不吸烟 |
| 147.00 | 50.00 | 82.00  | 23.14 | 不锻炼   |       |       |       | 从不吸烟 |
| 146.00 | 56.00 | 87.00  | 26.27 | 每天    | 30.00 | 2.00  | 散步    | 从不吸烟 |
| 168.00 | 61.90 | 90.00  | 21.93 | 不锻炼   |       |       |       | 从不吸烟 |
| 146.00 | 55.00 | 86.00  | 25.80 | 每天    | 30.00 | 1.00  | 散步    | 从不吸烟 |
| 145.00 | 52.00 | 90.00  | 24.73 | 每天    | 30.00 | 10.00 | 散步    | 从不吸烟 |
| 152.50 | 51.70 | 82.00  | 22.23 | 每天    | 60.00 | 10.00 | 散步    | 从不吸烟 |
| 149.00 | 42.00 | 87.00  | 18.92 | 每天    | 20.00 | 4.00  | 散步    | 从不吸烟 |
| 154.50 | 64.50 | 88.00  | 27.02 | 每天    | 20.00 | 2.00  | 散步    | 从不吸烟 |
| 159.00 | 56.00 | 73.00  | 22.15 | 每天    | 30.00 | 2.00  | 散步    | 从不吸烟 |
| 153.00 | 68.00 | 88.00  | 29.05 | 每天    | 60.00 | 3.00  | 散步    | 从不吸烟 |
| 150.00 | 60.00 | 88.00  | 26.67 | 每天    | 30.00 | 4.00  | 散步    | 从不吸烟 |
| 153.00 | 47.00 | 76.00  | 20.08 | 不锻炼   |       |       |       | 从不吸烟 |
| 156.00 | 72.00 | 96.00  | 29.59 | 不锻炼   |       |       |       | 从不吸烟 |
| 151.00 | 53.00 | 83.00  | 23.24 | 每天    | 60.00 | 1.00  | 散步    | 从不吸烟 |
| 154.00 | 55.00 | 84.00  | 23.19 | 每天    | 60.00 | 4.00  | 散步    | 从不吸烟 |
| 139.00 | 38.00 | 70.00  | 19.67 | 每天    | 30.00 | 5.00  | 散步    | 从不吸烟 |
| 151.00 | 59.00 | 87.00  | 25.88 | 每天    | 30.00 | 10.00 | 散步    | 从不吸烟 |
| 154.00 | 50.00 | 80.00  | 21.08 | 每天    | 30.00 | 4.00  | 散步    | 从不吸烟 |
| 151.00 | 54.30 | 92.00  | 23.81 | 每天    | 60.00 | 5.00  | 散步    | 从不吸烟 |
| 147.00 | 48.40 | 76.00  | 22.40 | 每天    | 30.00 | 3.00  | 散步    | 从不吸烟 |
| 137.00 | 34.80 | 60.00  | 18.54 | 每天    | 30.00 | 10.00 | 散步    | 从不吸烟 |

|        |       |        |       |       |        |       |       |      |
|--------|-------|--------|-------|-------|--------|-------|-------|------|
| 158.00 | 63.00 | 83.00  | 25.24 | 每天    | 30.00  | 2.00  | 散步    | 从不吸烟 |
| 162.00 | 64.00 | 93.00  | 24.39 | 每天    | 30.00  | 1.00  | 散步    | 从不吸烟 |
| 152.00 | 61.00 | 87.00  | 26.40 | 每天    | 30.00  | 7.00  | 散步    | 从不吸烟 |
| 148.00 | 42.00 | 70.00  | 19.17 | 每天    | 15.00  | 1.00  | 散步    | 从不吸烟 |
| 155.00 | 44.00 | 76.00  | 18.31 | 每周一次↓ | 30.00  | 1.00  | 散步    | 从不吸烟 |
| 148.00 | 51.00 | 83.00  | 23.28 | 每天    | 60.00  | 6.00  | 散步    | 从不吸烟 |
| 152.00 | 67.00 | 94.00  | 29.00 | 不锻炼   |        |       |       | 从不吸烟 |
| 144.00 | 42.40 | 86.00  | 20.45 | 每天    | 60.00  | 7.00  | 散步    | 从不吸烟 |
| 160.00 | 82.00 | 102.00 | 32.03 | 每天    | 30.00  | 3.00  | 散步    | 从不吸烟 |
| 159.50 | 68.00 | 97.00  | 26.73 | 每天    | 30.00  | 1.00  | 散步    | 从不吸烟 |
| 159.50 | 68.00 | 90.00  | 26.73 | 不锻炼   |        |       |       | 从不吸烟 |
| 149.00 | 46.00 | 73.00  | 20.72 | 每天    | 120.00 | 6.00  | 散步、跳绳 | 从不吸烟 |
| 155.00 | 56.30 | 85.00  | 23.43 | 不锻炼   |        |       |       | 从不吸烟 |
| 151.00 | 44.00 | 73.00  | 19.30 | 每天    | 20.00  | 14.00 | 散步    | 从不吸烟 |
| 153.00 | 60.00 | 89.00  | 25.63 | 每天    | 30.00  | 4.00  | 散步    | 从不吸烟 |
| 154.00 | 65.00 | 89.00  | 27.41 | 每天    | 30.00  | 4.00  | 散步    | 从不吸烟 |
| 153.00 | 86.50 | 104.00 | 36.95 | 不锻炼   |        |       |       | 从不吸烟 |
| 158.00 | 61.00 | 87.00  | 24.44 | 每天    | 30.00  | 9.00  | 散步    | 从不吸烟 |
| 138.00 | 54.00 | 92.00  | 28.36 | 不锻炼   |        |       |       | 从不吸烟 |
| 145.00 | 57.00 | 88.00  | 27.11 | 每天    | 60.00  | 7.00  | 散步    | 从不吸烟 |
| 149.00 | 59.00 | 94.00  | 26.58 | 每天    | 60.00  | 3.00  | 散步    | 从不吸烟 |
| 137.00 | 30.00 | 76.00  | 15.98 | 每天    | 30.00  | 4.00  | 散步    | 从不吸烟 |
| 164.00 | 58.80 | 82.00  | 21.86 | 每天    | 30.00  | 10.00 | 散步    | 从不吸烟 |
| 153.00 | 52.00 | 97.00  | 22.21 | 每天    | 60.00  | 18.00 | 散步    | 吸烟   |
| 145.50 | 50.00 | 83.00  | 23.62 | 不锻炼   |        |       |       | 从不吸烟 |
| 153.00 | 54.00 | 80.00  | 23.07 | 不锻炼   |        |       |       | 从不吸烟 |
| 141.00 | 45.60 | 80.00  | 22.94 | 不锻炼   |        |       |       | 从不吸烟 |
| 143.00 | 52.00 | 95.00  | 25.43 | 每天    | 60.00  | 5.00  | 散步    | 从不吸烟 |
| 148.00 | 42.00 | 70.00  | 19.17 | 每天    | 30.00  | 1.00  | 散步    | 从不吸烟 |
| 144.50 | 50.70 | 76.00  | 24.28 | 每周一次↓ | 30.00  | 1.00  | 散步    | 从不吸烟 |
| 159.00 | 52.80 | 83.00  | 20.89 | 每天    | 30.00  | 10.00 | 散步    | 从不吸烟 |
| 150.50 | 46.30 | 73.00  | 20.44 | 每天    | 40.00  | 10.00 | 散步    | 从不吸烟 |
| 156.50 | 54.45 | 87.00  | 22.23 | 每天    | 30.00  | 4.00  | 散步    | 从不吸烟 |
| 139.00 | 53.00 | 82.00  | 27.43 | 不锻炼   |        |       |       | 从不吸烟 |
| 158.00 | 65.50 | 89.00  | 26.24 | 不锻炼   |        |       |       | 从不吸烟 |
| 138.50 | 50.00 | 84.00  | 26.07 | 每天    | 60.00  | 4.00  | 散步    | 从不吸烟 |
| 157.00 | 64.00 | 84.00  | 25.96 | 不锻炼   |        |       |       | 从不吸烟 |
| 154.00 | 57.30 | 85.00  | 24.16 | 每天    | 30.00  | 8.00  | 散步    | 从不吸烟 |
| 156.00 | 60.00 | 87.00  | 24.65 | 不锻炼   |        |       |       | 从不吸烟 |
| 147.00 | 55.00 | 90.00  | 25.45 | 每天    | 30.00  | 6.00  | 散步    | 从不吸烟 |
| 144.00 | 53.00 | 83.00  | 25.56 | 每天    | 30.00  | 2.00  | 散步    | 从不吸烟 |
| 145.00 | 47.00 | 77.00  | 22.35 | 每天    | 60.00  | 6.00  | 散步    | 从不吸烟 |
| 158.00 | 66.00 | 91.00  | 26.44 | 每天    | 60.00  | 9.00  | 散步    | 从不吸烟 |
| 147.00 | 48.50 | 75.50  | 22.44 | 每天    | 30.00  | 2.00  | 散步    | 从不吸烟 |
| 151.00 | 59.00 | 85.00  | 25.88 | 不锻炼   |        |       |       | 从不吸烟 |
| 148.50 | 50.50 | 72.50  | 22.90 | 每天    | 30.00  | 1.00  | 散步    | 从不吸烟 |
| 165.00 | 73.70 | 96.00  | 27.07 | 每天    | 60.00  |       | 散步、跳绳 | 从不吸烟 |
| 160.00 | 59.50 | 91.00  | 23.24 | 不锻炼   |        |       |       | 从不吸烟 |
| 151.00 | 59.00 | 90.00  | 25.88 | 每天    | 60.00  | 5.00  | 散步    | 从不吸烟 |
| 159.50 | 63.00 | 90.00  | 24.76 | 每天    | 30.00  | 4.00  | 散步    | 从不吸烟 |
| 147.50 | 51.50 | 87.00  | 23.67 | 不锻炼   |        |       |       | 从不吸烟 |

|        |       |        |       |       |       |       |    |      |
|--------|-------|--------|-------|-------|-------|-------|----|------|
| 150.00 | 50.00 | 85.00  | 22.22 | 每周一次↓ | 30.00 | 1.00  | 散步 | 从不吸烟 |
| 151.50 | 50.10 | 79.00  | 21.83 | 每天    | 30.00 | 5.00  | 散步 | 从不吸烟 |
| 150.00 | 39.80 | 80.00  | 17.69 | 不锻炼   |       |       |    | 从不吸烟 |
| 131.00 | 36.00 | 80.00  | 20.98 | 每天    | 30.00 | 17.00 | 散步 | 吸烟   |
| 143.00 | 58.50 | 92.00  | 28.61 | 每天    | 30.00 | 2.00  | 散步 | 从不吸烟 |
| 143.00 | 66.00 | 99.00  | 32.28 | 不锻炼   |       |       |    | 从不吸烟 |
| 156.00 | 49.00 | 81.00  | 20.13 | 不锻炼   |       |       |    | 从不吸烟 |
| 157.00 | 52.00 | 83.00  | 21.10 | 每天    | 60.00 | 5.00  | 散步 | 从不吸烟 |
| 167.00 | 67.00 | 86.00  | 24.02 | 不锻炼   |       |       |    | 从不吸烟 |
| 141.00 | 40.50 | 64.50  | 20.37 | 每天    | 30.00 | 1.00  | 散步 | 从不吸烟 |
| 141.00 | 55.50 | 90.00  | 27.92 | 每天    | 30.00 | 3.00  | 散步 | 从不吸烟 |
| 151.00 | 59.50 | 90.00  | 26.10 | 每天    | 40.00 | 1.00  | 散步 | 从不吸烟 |
| 148.00 | 46.00 | 72.00  | 21.00 | 每周一次↓ | 30.00 | 1.00  | 散步 | 从不吸烟 |
| 146.00 | 60.00 | 92.00  | 28.15 | 每天    | 60.00 | 2.00  | 散步 | 从不吸烟 |
| 152.00 | 63.00 | 102.00 | 27.27 | 每天    | 30.00 | 1.00  | 散步 | 从不吸烟 |
| 157.00 | 80.00 | 105.00 | 32.46 | 每天    | 20.00 | 2.00  | 散步 | 从不吸烟 |
| 140.00 | 51.00 | 85.00  | 26.02 | 每天    | 30.00 | 3.00  | 散步 | 从不吸烟 |
| 147.00 | 53.00 | 80.00  | 24.53 | 每天    | 60.00 | 11.00 | 跳舞 | 从不吸烟 |
| 148.00 | 62.80 | 100.00 | 28.67 | 每天    | 60.00 | 1.00  | 散步 | 从不吸烟 |
| 150.50 | 67.00 | 102.00 | 29.58 | 每天    | 60.00 |       | 骑车 | 从不吸烟 |
| 148.00 | 50.00 | 79.00  | 22.83 | 每天    | 30.00 | 10.00 | 跳舞 | 从不吸烟 |
| 153.50 | 45.00 | 73.00  | 19.10 | 不锻炼   |       |       |    | 从不吸烟 |
| 155.00 | 52.00 | 74.00  | 21.64 | 每天    | 20.00 | 2.00  | 散步 | 从不吸烟 |
| 158.00 | 74.00 | 97.00  | 29.64 | 每天    | 60.00 | 11.00 | 散步 | 从不吸烟 |
| 157.00 | 75.00 | 100.00 | 30.43 | 每天    | 60.00 | 4.00  | 散步 | 从不吸烟 |
| 147.00 | 55.00 | 88.00  | 25.45 | 每天    | 30.00 | 3.00  | 散步 | 从不吸烟 |
| 142.00 | 49.50 | 85.00  | 24.55 | 每天    | 30.00 | 8.00  | 散步 | 从不吸烟 |
| 143.50 | 59.20 | 93.00  | 28.75 | 每天    | 30.00 | 8.00  | 散步 | 从不吸烟 |
| 141.00 | 51.00 | 83.00  | 25.65 | 不锻炼   |       |       |    | 从不吸烟 |
| 143.00 | 48.00 | 86.00  | 23.47 | 每天    | 60.00 | 11.00 | 散步 | 从不吸烟 |
| 142.00 | 42.00 | 76.00  | 20.83 | 每天    | 60.00 | 7.00  | 散步 | 从不吸烟 |
| 147.00 | 60.30 | 87.00  | 27.91 | 不锻炼   |       |       |    | 从不吸烟 |
| 132.00 | 36.00 | 78.00  | 20.66 | 每天    | 30.00 | 8.00  | 散步 | 从不吸烟 |
| 155.00 | 57.00 | 91.00  | 23.73 | 每天    | 60.00 | 4.00  | 散步 | 从不吸烟 |
| 153.50 | 58.20 | 90.00  | 24.70 | 每天    | 30.00 | 3.00  | 散步 | 从不吸烟 |
| 153.00 | 52.00 | 75.00  | 22.21 | 每天    | 30.00 | 7.00  | 散步 | 从不吸烟 |
| 148.00 | 44.00 | 71.00  | 20.09 | 每天    | 30.00 | 2.00  | 做操 | 从不吸烟 |
| 153.00 | 58.00 | 85.00  | 24.78 | 每周一次↓ | 30.00 | 1.00  | 散步 | 从不吸烟 |
| 144.00 | 50.00 | 82.00  | 24.11 | 每周一次↓ | 30.00 | 1.00  | 散步 | 从不吸烟 |
| 143.00 | 45.00 | 76.00  | 22.01 | 不锻炼   |       |       |    | 从不吸烟 |
| 150.00 | 48.00 | 80.00  | 21.33 | 不锻炼   |       |       |    | 从不吸烟 |
| 150.00 | 59.00 | 88.00  | 26.22 | 每天    | 60.00 | 11.00 | 散步 | 从不吸烟 |
| 155.00 | 56.00 | 87.00  | 23.31 | 每天    | 30.00 | 7.00  | 散步 | 从不吸烟 |
| 151.00 | 52.30 | 83.00  | 22.94 | 每周一次↓ | 30.00 | 11.00 | 散步 | 从不吸烟 |
| 152.00 | 59.00 | 81.00  | 25.54 | 每天    | 60.00 | 8.00  | 散步 | 从不吸烟 |
| 160.00 | 56.00 | 79.00  | 21.87 | 每天    | 30.00 | 2.00  | 散步 | 从不吸烟 |
| 144.00 | 55.00 | 91.00  | 26.52 | 每天    | 60.00 | 3.00  | 散步 | 从不吸烟 |
| 148.00 | 45.00 | 82.00  | 20.54 | 不锻炼   |       |       |    | 从不吸烟 |
| 152.00 | 93.00 | 117.00 | 40.25 | 每天    | 30.00 | 6.00  | 散步 | 从不吸烟 |
| 160.00 | 67.00 | 97.00  | 26.17 | 每天    | 30.00 | 11.00 | 散步 | 从不吸烟 |
| 155.00 | 64.00 | 93.00  | 26.64 | 不锻炼   |       |       |    | 从不吸烟 |

|        |       |        |       |       |       |       |    |      |
|--------|-------|--------|-------|-------|-------|-------|----|------|
| 147.00 | 42.00 | 73.00  | 19.44 | 每天    | 30.00 | 15.00 | 散步 | 吸烟   |
| 149.00 | 47.00 | 83.00  | 21.17 | 每天    | 60.00 | 12.00 | 散步 | 从不吸烟 |
| 153.50 | 60.00 | 91.00  | 25.46 | 不锻炼   |       |       |    | 从不吸烟 |
| 150.00 | 49.00 | 80.00  | 21.78 | 每天    | 30.00 | 1.00  | 散步 | 从不吸烟 |
| 140.00 | 45.00 | 93.00  | 22.96 | 每天    | 30.00 | 2.00  | 散步 | 从不吸烟 |
| 154.00 | 55.90 | 86.00  | 23.57 | 每周一次! | 15.00 | 1.00  | 散步 | 从不吸烟 |
| 150.00 | 53.50 | 90.00  | 23.78 | 每天    | 30.00 | 4.00  | 散步 | 从不吸烟 |
| 154.00 | 63.00 | 94.00  | 26.56 | 每天    | 40.00 | 3.00  | 散步 | 从不吸烟 |
| 155.00 | 61.70 | 81.00  | 25.68 | 每天    | 60.00 | 10.00 | 散步 | 从不吸烟 |
| 144.00 | 58.00 | 87.00  | 27.97 | 每天    | 40.00 | 6.00  | 散步 | 从不吸烟 |
| 146.00 | 53.00 | 90.00  | 24.86 | 每天    | 60.00 | 4.00  | 散步 | 从不吸烟 |
| 154.00 | 52.00 | 86.00  | 21.93 | 每天    | 30.00 | 1.00  | 散步 | 从不吸烟 |
| 156.00 | 63.50 | 90.00  | 26.09 | 每天    | 60.00 | 3.00  | 散步 | 从不吸烟 |
| 154.00 | 53.00 | 79.00  | 22.35 | 每天    | 30.00 | 7.00  | 散步 | 从不吸烟 |
| 147.00 | 56.80 | 91.00  | 26.29 | 每周一次! | 10.00 | 11.00 | 散步 | 从不吸烟 |
| 146.00 | 65.00 | 94.00  | 30.49 | 每天    | 30.00 | 2.00  | 散步 | 从不吸烟 |
| 154.00 | 55.50 | 78.00  | 23.40 | 不锻炼   |       |       |    | 从不吸烟 |
| 142.00 | 41.00 | 77.00  | 20.33 | 每周一次! | 30.00 | 7.00  | 做操 | 从不吸烟 |
| 157.50 | 71.20 | 103.00 | 28.70 | 每天    | 50.00 | 1.00  | 散步 | 从不吸烟 |
| 157.00 | 55.00 | 83.00  | 22.31 | 每天    | 60.00 | 11.00 | 散步 | 从不吸烟 |
| 147.00 | 57.00 | 85.00  | 26.38 | 不锻炼   |       |       |    | 从不吸烟 |
| 141.00 | 39.50 | 70.00  | 19.87 | 不锻炼   |       |       |    | 从不吸烟 |
| 146.00 | 54.00 | 89.00  | 25.33 | 不锻炼   |       |       |    | 从不吸烟 |
| 148.00 | 42.00 | 74.00  | 19.17 | 每天    | 30.00 | 5.00  | 散步 | 从不吸烟 |
| 150.00 | 57.00 | 92.00  | 25.33 | 不锻炼   |       |       |    | 从不吸烟 |
| 156.00 | 59.00 | 94.00  | 24.24 | 每天    | 60.00 | 4.00  | 散步 | 从不吸烟 |
| 142.00 | 58.00 | 94.00  | 28.76 | 不锻炼   |       |       |    | 从不吸烟 |
| 164.00 | 60.00 | 92.00  | 22.31 | 不锻炼   |       |       |    | 从不吸烟 |
| 160.50 | 61.80 | 89.00  | 23.99 | 不锻炼   |       |       |    | 从不吸烟 |
| 154.00 | 55.00 | 82.00  | 23.19 | 每天    | 30.00 | 3.00  | 散步 | 从不吸烟 |
| 156.00 | 53.50 | 85.00  | 21.98 | 每天    | 30.00 | 2.00  | 散步 | 从不吸烟 |
| 156.00 | 66.50 | 94.00  | 27.33 | 不锻炼   |       |       |    | 从不吸烟 |
| 142.50 | 46.00 | 73.00  | 22.65 | 不锻炼   |       |       |    | 从不吸烟 |
| 146.50 | 55.50 | 85.00  | 25.86 | 每天    | 60.00 | 2.00  | 散步 | 从不吸烟 |
| 153.00 | 54.20 | 78.00  | 23.15 | 每天    | 60.00 | 5.00  | 跳舞 | 从不吸烟 |
| 150.00 | 62.50 | 90.00  | 27.78 | 不锻炼   |       |       |    | 从不吸烟 |
| 148.50 | 48.50 | 72.00  | 21.99 | 每天    | 30.00 | 10.00 | 散步 | 从不吸烟 |
| 154.00 | 74.00 | 90.00  | 31.20 | 不锻炼   |       |       |    | 从不吸烟 |
| 146.00 | 61.00 | 88.00  | 28.62 | 每天    | 30.00 | 4.00  | 散步 | 从不吸烟 |
| 145.00 | 53.30 | 84.00  | 25.35 | 不锻炼   |       |       |    | 从不吸烟 |
| 163.00 | 66.00 | 92.00  | 24.84 | 不锻炼   |       |       |    | 从不吸烟 |
| 158.50 | 58.70 | 84.00  | 23.37 | 不锻炼   |       |       |    | 从不吸烟 |
| 138.00 | 50.00 | 83.00  | 26.25 | 每天    | 60.00 | 1.00  | 散步 | 从不吸烟 |
| 144.00 | 55.00 | 92.00  | 26.52 | 每天    | 30.00 | 4.00  | 散步 | 从不吸烟 |
| 144.50 | 64.00 | 94.00  | 30.65 | 每天    | 60.00 | 8.00  | 散步 | 吸烟   |
| 150.00 | 54.00 | 76.00  | 24.00 | 每天    | 30.00 | 1.00  | 散步 | 从不吸烟 |
| 160.00 | 56.00 | 78.00  | 21.87 | 不锻炼   |       |       |    | 从不吸烟 |
| 155.00 | 53.50 | 90.00  | 22.27 | 每天    | 60.00 | 1.00  | 散步 | 从不吸烟 |
| 153.00 | 66.00 | 100.00 | 28.19 | 每天    | 40.00 | 7.00  | 散步 | 从不吸烟 |
| 154.00 | 62.50 | 85.00  | 26.35 | 每天    | 90.00 | 5.00  | 散步 | 从不吸烟 |
| 151.00 | 51.00 | 84.00  | 22.37 | 每天    | 60.00 | 5.00  | 散步 | 从不吸烟 |

|        |       |       |       |     |       |       |    |      |
|--------|-------|-------|-------|-----|-------|-------|----|------|
| 145.00 | 51.00 | 92.00 | 24.26 | 不锻炼 |       |       |    | 从不吸烟 |
| 149.00 | 70.50 | 97.00 | 31.76 | 不锻炼 |       |       |    | 从不吸烟 |
| 142.00 | 65.00 | 96.00 | 32.24 | 每天  | 60.00 | 7.00  | 瑜伽 | 从不吸烟 |
| 146.00 | 60.00 | 90.00 | 28.15 | 每天  | 60.00 | 10.00 | 散步 | 从不吸烟 |
| 158.00 | 59.00 | 93.00 | 23.63 | 每天  | 30.00 | 1.00  | 散步 | 从不吸烟 |
| 135.00 | 48.40 | 87.00 | 26.56 | 不锻炼 |       |       |    | 从不吸烟 |























































































































从不  
从不  
从不  
从不  
从不

| 饮酒种类 | 空腹血糖  | 总胆固醇 | 甘油三酯 | 血清低密 | 血清高密 | B超检查异常 | B超检查异常描述   |
|------|-------|------|------|------|------|--------|------------|
|      | 5.01  | 6.69 | 2.09 | 3.66 | 1.74 | 异常     | 脂肪肝声像      |
|      | 6.06  | 6.63 | 1.82 | 3.80 | 1.53 | 异常     | 轻度脂肪肝声像    |
|      | 4.85  | 6.59 | 1.50 | 3.67 | 1.59 | 异常     | 胆囊内强回声（考虑  |
|      | 4.68  | 5.03 | 0.81 | 2.73 | 1.40 | 未见异常   |            |
|      | 5.02  | 6.42 | 1.98 | 3.70 | 1.64 | 未见异常   |            |
|      | 5.05  | 5.46 | 0.81 | 2.50 | 2.06 | 未见异常   |            |
|      | 6.10  | 4.08 | 1.99 | 1.94 | 1.46 | 异常     | 肝囊肿；肝内强回声  |
|      | 6.13  | 5.71 | 1.36 | 3.18 | 1.59 | 异常     | 1、脂肪肝声像；2、 |
|      | 6.23  | 5.93 | 2.76 | 3.33 | 1.37 | 异常     | 腹部B超，脂肪肝声像 |
|      | 6.52  | 7.30 | 1.20 | 4.50 | 1.97 | 异常     | 轻度脂肪肝声像。   |
|      | 5.65  | 5.46 | 1.13 | 2.65 | 1.98 | 未见异常   |            |
|      | 4.88  | 7.06 | 1.29 | 4.54 | 1.76 | 异常     | 轻度脂肪肝声像    |
|      | 4.57  | 4.41 | 1.82 | 2.17 | 1.26 | 未见异常   |            |
|      | 5.25  | 3.49 | 1.25 | 1.65 | 1.37 | 异常     | 轻度脂肪肝声像    |
|      | 6.90  | 6.06 | 1.57 | 3.53 | 1.66 | 未见异常   |            |
|      | 5.53  | 4.10 | 2.15 | 2.05 | 1.34 | 异常     | 胆囊结石       |
|      | 4.08  | 5.60 | 2.59 | 2.86 | 1.47 | 异常     | 1、脂肪肝声像2、胆 |
|      | 4.83  | 6.32 | 2.10 | 3.44 | 1.55 | 未见异常   |            |
|      | 5.65  | 7.30 | 2.22 | 4.23 | 1.74 | 异常     | 脂肪肝声像      |
|      | 4.88  | 6.21 | 2.46 | 3.43 | 1.89 | 未见异常   |            |
|      | 4.41  | 5.39 | 1.19 | 2.51 | 1.93 | 未见异常   |            |
|      | 4.65  | 6.84 | 1.55 | 4.06 | 1.90 | 异常     | 脂肪肝，肝内强回声  |
|      | 6.26  | 5.62 | 1.90 | 3.41 | 1.39 | 异常     | 脂肪肝声像。     |
|      | 6.95  | 6.81 | 3.31 | 3.71 | 1.77 | 异常     | 脂肪肝声像；     |
|      | 4.73  | 3.92 | 0.69 | 1.77 | 1.51 | 未见异常   |            |
|      | 4.82  | 4.21 | 0.86 | 1.67 | 1.85 | 未见异常   |            |
|      | 5.69  | 3.63 | 2.74 | 1.70 | 1.26 | 异常     | 脂肪肝声像      |
|      | 5.97  | 7.38 | 6.34 | 2.71 | 1.67 | 异常     | 1、脂肪肝声像2、肝 |
|      | 5.44  | 9.22 | 1.72 | 6.10 | 2.23 | 异常     | 轻度脂肪肝声像    |
|      | 15.48 | 7.33 | 3.87 | 3.87 | 1.57 | 异常     | 脂肪肝声像      |
|      | 10.87 | 4.81 | 1.39 | 2.51 | 1.64 | 异常     | 脂肪肝声像。     |
|      | 18.06 | 8.18 | 2.15 | 5.16 | 2.04 | 异常     | 脂肪肝声像；     |
|      | 4.61  | 4.26 | 1.21 | 2.01 | 1.71 | 未见异常   |            |
|      | 5.36  | 5.21 | 1.33 | 2.89 | 1.46 | 异常     | 脂肪肝声像      |
|      | 7.77  | 6.11 | 2.74 | 3.35 | 1.65 | 异常     | 轻度脂肪肝声像    |
|      | 5.17  | 6.58 | 2.01 | 2.99 | 2.37 | 未见异常   |            |
|      | 6.10  | 6.36 | 2.56 | 3.49 | 1.60 | 异常     | 轻度脂肪肝声像    |
|      | 5.67  | 5.28 | 1.31 | 2.31 | 1.95 | 未见异常   |            |
|      | 5.02  | 4.60 | 1.59 | 2.53 | 1.28 | 异常     | 脂肪肝声像      |
|      | 5.01  | 7.07 | 1.49 | 4.04 | 1.75 |        |            |
|      | 4.62  | 7.45 | 1.61 | 4.43 | 1.98 | 异常     | 轻度脂肪肝声像    |
|      | 5.19  | 4.45 | 3.51 | 1.91 | 1.37 | 异常     | 轻度脂肪肝声像    |
|      | 4.78  | 4.87 | 0.66 | 2.35 | 1.84 |        |            |
|      | 5.29  | 5.79 | 1.32 | 2.99 | 1.81 | 未见异常   |            |
|      | 5.46  | 7.66 | 1.17 | 5.00 | 1.86 |        |            |
|      | 5.20  | 5.34 | 0.65 | 3.01 | 1.56 | 未见异常   |            |
|      | 5.49  | 6.21 | 1.28 | 3.70 | 1.75 |        |            |
|      | 4.92  | 7.68 | 2.96 | 4.30 | 1.84 | 异常     | 脂肪肝声像      |
|      | 5.02  | 6.01 | 1.63 | 3.38 | 1.45 |        |            |
|      | 5.13  | 7.20 | 0.89 | 4.49 | 1.70 | 异常     | 肝实质回声稍粗、肝  |

|       |       |       |      |      |                 |
|-------|-------|-------|------|------|-----------------|
| 5.25  | 4.80  | 2.77  | 2.35 | 1.51 | 未见异常            |
| 4.80  | 5.58  | 2.62  | 3.24 | 1.49 | 异常 胆囊结石         |
| 4.99  | 6.51  | 1.29  | 3.71 | 1.68 | 异常 胆囊内强回声(考虑结   |
| 5.04  | 4.20  | 1.88  | 1.89 | 1.62 | 异常 胆囊内强回声(考虑    |
| 5.77  | 6.42  | 1.34  | 2.79 | 2.42 | 异常 胆囊结石         |
| 8.37  | 4.75  | 0.98  | 2.19 | 1.84 | 未见异常            |
| 5.35  | 5.20  | 1.40  | 2.82 | 1.76 | 异常 未除胆囊结石       |
| 6.91  | 4.98  | 2.78  | 2.43 | 1.36 | 异常 轻度脂肪肝声像      |
| 7.37  | 6.64  | 1.56  | 3.83 | 1.82 | 异常 脂肪肝声像、胆囊内    |
| 3.98  | 7.47  | 1.13  | 4.24 | 2.17 | 未见异常            |
| 5.72  | 5.98  | 1.69  | 3.68 | 1.55 | 异常 肝囊肿          |
| 5.34  | 6.29  | 0.73  | 3.40 | 2.03 | 异常 1、肝左叶实质回声欠   |
| 4.69  | 4.18  | 3.17  | 2.08 | 1.07 | 异常 脂肪肝声像,肝囊肿    |
| 16.88 | 3.53  | 2.65  | 1.62 | 1.26 | 异常 脂肪肝声像        |
| 5.86  | 4.61  | 1.98  | 2.52 | 1.43 | 异常 胆囊结石         |
| 4.97  | 5.39  | 1.14  | 3.19 | 1.37 |                 |
| 4.45  | 5.00  | 1.32  | 2.30 | 1.95 | 未见异常            |
| 6.83  | 11.80 | 17.83 | 3.25 | 1.17 | 异常 脂肪肝          |
| 5.08  | 5.68  | 2.42  | 2.63 | 1.89 | 未见异常            |
| 4.67  | 5.23  | 0.84  | 2.85 | 1.88 | 异常 1、脂肪肝声像;2、   |
| 6.35  | 5.09  | 1.70  | 2.75 | 1.37 | 异常 腹部B超:胆囊壁欠均   |
| 13.11 | 3.49  | 1.37  | 1.58 | 1.31 | 异常 腹部B超,脂肪肝声像   |
| 4.99  | 5.59  | 3.85  | 2.69 | 1.32 | 异常 轻度脂肪肝声像      |
| 5.10  | 4.33  | 1.25  | 2.34 | 1.33 | 未见异常            |
| 5.98  | 5.92  | 2.27  | 3.12 | 1.52 | 异常 腹部B超;1.脂肪肝声  |
| 7.34  | 4.39  | 2.25  | 2.23 | 1.61 | 异常 1.肝脏弥漫性改变.2  |
| 7.66  | 4.63  | 2.54  | 2.25 | 1.41 | 异常 1.胆囊缩小 2.胆总管 |
| 4.83  | 6.70  | 3.40  | 3.44 | 1.49 | 异常 肝内多发囊性回声(    |
| 5.06  | 7.14  | 1.86  | 4.45 | 1.60 | 异常 1.脂肪肝声像 2.肝囊 |
| 6.74  | 5.83  | 2.17  | 3.13 | 1.67 |                 |
| 5.09  | 3.59  | 1.25  | 1.59 | 1.49 | 未见异常            |
| 5.15  | 3.96  | 1.99  | 1.69 | 1.55 | 异常 脂肪肝声像        |
| 11.94 | 4.66  | 5.30  | 1.72 | 1.22 | 异常 脂肪肝声像        |
| 5.03  | 5.51  | 1.86  | 2.96 | 1.64 | 异常 胆囊内强回声,肝内囊   |
| 5.00  | 5.17  | 2.20  | 2.73 | 1.47 |                 |
| 6.68  | 5.15  | 2.17  | 2.68 | 1.52 | 异常 轻度脂肪肝声像      |
| 7.43  | 5.27  | 2.01  | 2.93 | 1.48 | 异常 腹部B超:脂肪肝声像   |
| 4.81  | 5.28  | 0.97  | 2.58 | 1.80 | 未见异常            |
| 5.94  | 5.30  | 2.63  | 2.85 | 1.46 | 异常 轻度脂肪肝声像      |
| 6.26  | 6.25  | 3.45  | 3.30 | 1.55 | 异常 脂肪肝声像        |
| 4.45  | 8.21  | 1.86  | 4.79 | 2.28 | 异常 轻度脂肪肝声像,肝    |
| 6.33  | 6.37  | 1.36  | 3.78 | 1.54 | 异常 脂肪肝声像        |
| 5.18  | 6.47  | 4.70  | 2.55 | 1.66 | 异常 轻度脂肪肝声像      |
| 6.91  | 5.81  | 2.66  | 3.16 | 1.59 | 异常 轻度脂肪肝声像      |
| 5.47  | 5.38  | 7.74  | 2.50 | 1.16 | 异常 轻度脂肪肝声像。     |
| 4.72  | 6.35  | 2.03  | 4.09 | 1.41 | 异常 1、脂肪肝声像;2、   |
| 4.65  | 4.40  | 1.80  | 2.32 | 1.44 | 未见异常            |
| 5.79  | 7.31  | 1.84  | 4.26 | 1.61 | 未见异常            |
| 5.27  | 7.73  | 1.84  | 4.60 | 2.22 | 异常 轻度脂肪肝声像      |
| 5.12  | 7.27  | 1.58  | 4.42 | 1.79 | 未见异常            |
| 4.60  | 6.21  | 1.63  | 3.53 | 1.64 | 异常 1、脂肪肝声像;2、   |

|       |      |      |      |      |      |              |
|-------|------|------|------|------|------|--------------|
| 5.18  | 5.30 | 1.29 | 2.91 | 1.73 | 异常   | 肝囊肿          |
| 4.89  | 6.86 | 2.05 | 4.25 | 1.43 | 未见异常 |              |
| 4.79  | 5.89 | 1.25 | 2.93 | 2.21 | 异常   | 胆囊结石         |
| 6.21  | 6.88 | 1.38 | 3.61 | 1.98 | 异常   | 1脂肪肝声像 2胆囊   |
| 4.93  | 5.99 | 1.25 | 3.72 | 1.48 | 异常   | 胆囊切除术后       |
| 5.90  | 6.56 | 2.47 | 3.23 | 1.83 | 异常   | 肝左叶增大, 肝右叶   |
| 6.35  | 6.14 | 1.51 | 3.35 | 1.96 | 异常   | 轻度脂肪肝声像      |
| 5.78  | 7.03 | 1.79 | 4.15 | 1.58 | 异常   | 轻度脂肪肝声像      |
| 4.76  | 5.05 | 1.45 | 2.77 | 1.52 |      |              |
| 4.39  | 4.72 | 1.52 | 2.44 | 1.50 | 未见异常 |              |
| 4.77  | 7.27 | 1.42 | 4.36 | 1.86 | 异常   | 轻度脂肪肝        |
| 4.65  | 6.42 | 0.56 | 3.24 | 2.38 | 未见异常 |              |
| 5.11  | 5.62 | 1.42 | 3.21 | 1.45 | 异常   | 轻度脂肪肝声像      |
| 4.87  | 6.96 | 1.84 | 3.07 | 2.32 | 未见异常 |              |
| 4.77  | 5.01 | 1.24 | 2.87 | 1.50 | 异常   | 轻度脂肪肝声像      |
| 5.33  | 7.56 | 1.49 | 3.85 | 1.82 | 未见异常 |              |
| 4.76  | 4.14 | 0.94 | 2.01 | 1.45 | 未见异常 |              |
| 4.82  | 5.29 | 3.15 | 2.68 | 1.51 | 异常   | 轻度脂肪肝声像      |
| 5.58  | 6.59 | 2.04 | 3.57 | 1.76 | 异常   | 腹部B超, 轻度脂肪肝  |
| 6.09  | 4.48 | 2.51 | 1.97 | 1.49 | 未见异常 |              |
| 4.78  | 4.70 | 0.88 | 2.57 | 1.66 |      |              |
| 5.65  | 2.58 | 1.47 | 0.88 | 1.07 | 未见异常 |              |
| 5.98  | 5.83 | 1.88 | 3.30 | 1.56 | 异常   | 脂肪肝声像        |
| 5.59  | 5.50 | 2.92 | 2.90 | 1.51 | 未见异常 |              |
| 4.40  | 4.99 | 1.90 | 2.65 | 1.47 | 异常   | 脂肪肝声像        |
| 4.65  | 5.00 | 0.91 | 3.00 | 1.18 | 异常   | 脂肪肝          |
| 4.73  | 4.32 | 0.76 | 1.77 | 1.79 | 异常   | 腹部B超1. 肝内囊性区 |
| 4.93  | 4.76 | 1.89 | 2.26 | 1.68 | 异常   | 肝实质回声稍粗      |
| 5.12  | 5.46 | 1.92 | 3.00 | 1.57 | 异常   | 脂肪肝声像        |
| 6.68  | 5.17 | 2.86 | 2.57 | 1.59 | 异常   | 1、脂肪肝声像 2、   |
| 6.98  | 3.36 | 1.59 | 1.61 | 1.24 | 异常   | 轻度脂肪肝声像      |
| 6.84  | 4.32 | 2.06 | 2.27 | 1.11 | 异常   | 腹部B超; 脂肪肝声像  |
| 7.76  | 4.25 | 7.34 | 1.05 | 0.94 | 异常   | 轻度脂肪肝声像      |
| 4.83  | 7.82 | 2.55 | 4.83 | 1.69 | 未见异常 |              |
| 5.30  | 6.00 | 1.44 | 3.48 | 1.72 | 未见异常 |              |
| 5.25  | 5.11 | 2.71 | 2.64 | 1.52 | 异常   | 轻度脂肪肝声像      |
| 5.35  | 5.14 | 3.27 | 2.23 | 1.65 | 异常   | 脂肪肝声像        |
| 4.60  | 5.35 | 1.31 | 2.68 | 1.68 | 未见异常 |              |
| 4.95  | 5.53 | 1.45 | 2.99 | 1.76 | 未见异常 |              |
| 4.82  | 7.50 | 1.50 | 4.65 | 1.67 | 异常   | 胆囊结石         |
| 5.39  | 4.57 | 0.87 | 1.99 | 1.90 | 未见异常 |              |
| 8.40  | 5.97 | 1.18 | 3.31 | 1.73 | 异常   | 1、脂肪肝声像2、肝   |
| 9.38  | 5.57 | 1.31 | 3.10 | 1.54 | 异常   | 脂肪肝声像        |
| 6.42  | 5.41 | 1.11 | 2.94 | 1.75 | 异常   | 1、轻度脂肪肝声像;   |
| 6.09  | 4.94 | 2.10 | 2.71 | 1.29 | 异常   | 胆囊切除术后       |
| 4.96  | 5.96 | 2.11 | 2.66 | 2.19 | 异常   | 轻度脂肪肝声像, 肝   |
| 5.05  | 6.24 | 2.03 | 3.77 | 1.32 | 异常   | 胆囊结石         |
| 4.77  | 7.38 | 4.28 | 3.38 | 2.01 | 异常   | 1. 轻度脂肪肝声像   |
| 4.97  | 4.38 | 1.84 | 2.20 | 1.48 | 异常   | 轻度脂肪肝声像      |
| 16.75 | 4.95 | 4.73 | 2.10 | 1.24 | 异常   | 1、脂肪肝声像; 2、  |
| 6.85  | 3.57 | 2.26 | 1.62 | 1.43 |      |              |

|      |      |      |      |      |      |            |
|------|------|------|------|------|------|------------|
| 5.22 | 5.10 | 1.00 | 2.69 | 1.73 | 未见异常 |            |
| 6.49 | 4.00 | 3.74 | 1.68 | 1.18 | 异常   | 餐后胆囊，胆囊内异  |
| 6.19 | 5.04 | 2.11 | 2.74 | 1.34 | 未见异常 |            |
| 5.58 | 4.88 | 0.99 | 2.58 | 1.59 | 未见异常 |            |
| 4.70 | 5.08 | 1.06 | 2.69 | 1.63 | 未见异常 |            |
| 5.79 | 5.27 | 1.53 | 3.18 | 1.42 | 异常   | 脂肪肝声像。肝内多  |
| 5.19 | 6.39 | 2.60 | 3.78 | 1.56 | 异常   | 脂肪肝声像      |
| 4.61 | 7.49 | 1.99 | 3.90 | 2.13 | 未见异常 |            |
| 6.47 | 5.39 | 1.25 | 3.07 | 1.50 | 异常   | 轻度脂肪肝声像    |
| 4.53 | 8.16 | 4.00 | 3.62 | 2.18 | 未见异常 |            |
| 4.74 | 5.54 | 1.14 | 2.83 | 1.91 | 未见异常 |            |
| 9.33 | 7.03 | 3.42 | 4.03 | 1.43 | 异常   | 脂肪肝声像。     |
| 4.79 | 4.86 | 1.02 | 2.25 | 1.98 | 未见异常 |            |
| 5.47 | 3.53 | 0.86 | 1.61 | 1.34 | 未见异常 |            |
| 4.39 | 4.70 | 1.12 | 2.50 | 1.36 | 异常   | 1. 肝实质回声稍粗 |
| 4.96 | 6.56 | 2.02 | 3.63 | 1.86 | 未见异常 |            |
| 7.53 | 4.91 | 1.47 | 2.21 | 2.01 | 异常   | 胆囊内强回声，结石  |
| 6.11 | 5.19 | 2.04 | 2.48 | 1.76 | 异常   | 轻度脂肪肝声像    |
| 8.68 | 5.61 | 3.15 | 3.24 | 1.17 | 异常   | 胆囊结石       |
| 5.48 | 6.12 | 2.53 | 3.33 | 1.55 | 未见异常 |            |
| 6.41 | 6.21 | 3.23 | 3.28 | 1.49 | 异常   | 1肝右叶稍高回声结  |
| 4.60 | 5.94 | 1.39 | 3.59 | 1.57 | 未见异常 |            |
| 4.56 | 5.61 | 0.93 | 2.76 | 2.03 | 异常   | 腹部B超；肝内囊性[ |
| 5.28 | 4.73 | 2.65 | 2.39 | 1.32 | 异常   | 脂肪肝声像      |
| 4.88 | 5.93 | 3.02 | 3.28 | 1.33 | 异常   | 轻度脂肪肝声像    |
| 4.67 | 4.95 | 1.65 | 2.44 | 1.54 | 未见异常 |            |
| 7.31 | 5.72 | 1.84 | 3.36 | 1.50 | 异常   | 1、轻度脂肪肝声像； |
| 6.61 | 4.00 | 2.66 | 1.79 | 1.41 | 未见异常 |            |
| 5.44 | 4.07 | 1.79 | 2.13 | 1.36 | 异常   | 1、轻度脂肪肝声像  |
| 4.57 | 5.98 | 0.73 | 2.74 | 1.98 | 未见异常 |            |
| 8.65 | 4.20 | 1.55 | 1.51 | 1.93 | 异常   | 肝胆胰彩超：1、脂肪 |
| 5.15 | 5.42 | 1.15 | 3.17 | 1.59 | 未见异常 |            |
| 5.17 | 6.85 | 6.59 | 2.28 | 1.51 | 未见异常 |            |
| 4.89 | 6.55 | 1.83 | 4.01 | 1.49 | 异常   | 胆囊多发性结石    |
| 4.58 | 5.56 | 1.83 | 2.78 | 1.68 | 异常   | 肝囊肿        |
| 6.41 | 6.33 | 2.39 | 3.41 | 1.60 |      |            |
| 5.17 | 4.44 | 0.61 | 2.38 | 1.48 | 未见异常 |            |
| 5.59 | 5.46 | 3.90 | 2.44 | 1.48 | 未见异常 |            |
| 6.12 | 5.20 | 2.00 | 2.71 | 1.48 | 异常   | 脂肪肝声像      |
| 6.44 | 6.19 | 5.48 | 2.16 | 1.72 | 异常   | 脂肪肝声像；     |
| 5.19 | 4.00 | 0.78 | 1.98 | 1.55 | 异常   | 脂肪肝声像      |
| 5.71 | 6.22 | 4.32 | 3.12 | 1.39 | 异常   | 脂肪肝声像      |
| 6.87 | 7.06 | 1.87 | 3.96 | 1.92 | 异常   | 脂肪肝声像      |
| 5.16 | 4.27 | 3.20 | 2.05 | 1.12 | 未见异常 |            |
| 8.03 | 5.86 | 1.07 | 3.29 | 1.70 | 异常   | 轻度脂肪肝声像、胆  |
| 5.00 | 4.88 | 1.50 | 2.32 | 1.71 | 未见异常 |            |
| 6.94 | 6.75 | 1.77 | 3.63 | 2.06 | 未见异常 |            |
| 4.11 | 3.34 | 0.55 | 1.64 | 1.22 |      |            |
| 4.84 | 5.64 | 1.04 | 3.19 | 1.74 | 未见异常 |            |
| 4.80 | 4.63 | 3.80 | 1.62 | 1.68 | 异常   | 肝内强回声斑，考虑  |
| 5.52 | 5.54 | 1.45 | 3.07 | 1.49 | 异常   | 脂肪肝声像      |

|       |      |       |      |      |      |              |
|-------|------|-------|------|------|------|--------------|
| 8.09  | 8.05 | 1.82  | 5.42 | 1.64 | 异常   | 1、脂肪肝声像；2、   |
| 5.90  | 4.66 | 1.73  | 2.44 | 1.44 | 未见异常 |              |
| 4.99  | 4.48 | 1.51  | 2.26 | 1.49 | 异常   | 脂肪肝声像        |
| 5.37  | 6.38 | 1.39  | 3.61 | 1.62 | 未见异常 |              |
| 4.97  | 6.41 | 2.05  | 3.71 | 1.53 | 异常   | 胆囊壁稍厚        |
| 3.92  | 5.37 | 1.46  | 2.87 | 1.72 | 未见异常 |              |
| 5.88  | 5.30 | 2.29  | 2.59 | 1.94 |      |              |
| 5.34  | 3.82 | 1.08  | 1.74 | 1.50 | 异常   | 1、肝内囊 性回声（   |
| 5.13  | 5.53 | 1.48  | 3.07 | 1.75 |      |              |
| 14.85 | 3.17 | 10.90 | 1.43 | 1.30 | 未见异常 |              |
| 4.75  | 5.15 | 1.65  | 2.78 | 1.36 | 未见异常 |              |
| 4.83  | 4.84 | 0.82  | 2.11 | 2.01 | 异常   | 1、肝实质回声稍粗；   |
| 6.28  | 6.25 | 1.85  | 3.49 | 1.51 |      |              |
| 4.89  | 4.56 | 1.34  | 2.03 | 1.75 | 异常   | 肝小囊肿         |
| 4.87  | 6.42 | 1.50  | 4.04 | 1.37 | 异常   | 1、脂肪肝声像；2、   |
| 5.33  | 4.23 | 0.98  | 2.30 | 1.37 | 未见异常 |              |
| 4.45  | 5.22 | 0.97  | 2.62 | 1.69 | 异常   | 肝囊肿          |
| 5.36  | 5.92 | 2.36  | 3.25 | 1.58 | 异常   | 轻度脂肪肝声像      |
| 6.18  | 6.14 | 3.12  | 3.26 | 1.60 | 异常   | 1. 脂肪肝声像     |
| 4.82  | 4.34 | 2.26  | 2.25 | 1.21 |      |              |
| 10.06 | 2.96 | 3.40  | 1.31 | 1.02 |      |              |
| 4.73  | 3.53 | 1.79  | 1.42 | 1.34 | 未见异常 |              |
| 5.69  | 4.60 | 0.78  | 1.61 | 2.10 | 未见异常 |              |
| 5.39  | 6.69 | 1.71  | 4.13 | 1.56 | 未见异常 |              |
| 5.26  | 4.23 | 1.26  | 1.62 | 1.85 | 未见异常 |              |
| 5.23  | 5.00 | 0.92  | 2.78 | 1.63 | 异常   | 肝右叶稍强回声结节    |
| 4.82  | 8.57 | 2.57  | 4.86 | 1.98 | 异常   | 轻度脂肪肝声像      |
| 4.80  | 5.15 | 3.01  | 2.40 | 1.46 | 异常   | 轻度脂肪肝声像      |
| 5.07  | 8.80 | 5.15  | 4.13 | 1.87 | 异常   | 腹部B超；脂肪肝声像   |
| 4.35  | 7.11 | 15.10 | 4.12 | 1.96 |      |              |
| 4.31  | 6.21 | 1.00  | 3.05 | 1.94 | 异常   | 腹部B超；轻度脂肪肝   |
| 5.32  | 7.18 | 3.99  | 3.47 | 1.80 |      |              |
| 5.39  | 5.95 | 1.89  | 3.19 | 1.75 |      |              |
| 5.32  | 6.85 | 0.95  | 3.48 | 2.38 | 未见异常 |              |
| 6.39  | 7.63 | 1.53  | 4.53 | 2.30 |      |              |
| 4.32  | 5.10 | 2.55  | 2.24 | 1.67 | 异常   | 腹部B超；肝囊肿     |
| 4.48  | 5.84 | 2.92  | 2.95 | 1.45 | 异常   | 脂肪肝声像        |
| 5.45  | 5.90 | 0.93  | 3.44 | 1.67 | 异常   | 轻度脂肪肝声像      |
| 5.43  | 4.60 | 0.79  | 2.40 | 1.65 |      |              |
| 5.27  | 4.46 | 1.71  | 2.25 | 1.38 | 未见异常 |              |
| 4.75  | 7.30 | 1.36  | 4.30 | 1.81 |      |              |
| 5.41  | 6.99 | 4.68  | 3.21 | 1.36 | 异常   | 脂肪肝声像        |
| 5.81  | 5.87 | 3.82  | 2.83 | 1.37 | 异常   | 脂肪肝声像        |
| 5.92  | 4.71 | 2.52  | 2.40 | 1.40 | 异常   | 脂肪肝声像        |
| 4.54  | 5.57 | 1.22  | 3.23 | 1.69 | 未见异常 |              |
| 5.41  | 4.26 | 0.70  | 2.26 | 1.40 | 未见异常 |              |
| 5.52  | 6.56 | 1.35  | 4.07 | 1.66 | 异常   | 脂肪肝声像        |
| 5.32  | 5.93 | 2.75  | 3.18 | 1.55 | 异常   | 1. 轻度脂肪肝声像2. |
| 4.94  | 6.38 | 1.96  | 3.92 | 1.42 | 异常   | 脂肪肝声像        |
| 5.17  | 5.26 | 1.93  | 2.84 | 1.57 | 异常   | 脂肪肝声像        |
| 4.59  | 3.18 | 1.55  | 5.74 | 2.13 | 未见异常 |              |

|       |      |      |      |      |      |             |
|-------|------|------|------|------|------|-------------|
| 5.46  | 5.04 | 1.67 | 2.70 | 1.56 | 异常   | 轻度脂肪肝声像     |
| 4.58  | 4.05 | 3.35 | 1.64 | 1.51 | 异常   | 脂肪肝声像       |
| 7.56  | 5.50 | 4.17 | 2.78 | 1.19 |      |             |
| 5.21  | 6.93 | 1.56 | 4.03 | 1.73 | 未见异常 |             |
| 5.24  | 6.83 | 3.87 | 3.10 | 1.82 | 未见异常 |             |
| 6.04  | 5.57 | 2.40 | 2.97 | 1.61 | 未见异常 |             |
| 17.42 | 3.14 | 4.09 | 1.06 | 1.18 | 异常   | 脂肪肝声像       |
| 5.89  | 5.04 | 1.13 | 3.01 | 1.42 |      |             |
| 5.97  | 5.43 | 1.06 | 2.74 | 1.82 | 未见异常 |             |
| 5.70  | 7.13 | 2.56 | 3.96 | 1.59 | 异常   | 脂肪肝声像       |
| 5.88  | 6.07 | 3.15 | 3.09 | 1.79 | 异常   | 脂肪肝声像。      |
| 4.77  | 5.49 | 1.72 | 2.29 | 2.17 | 未见异常 |             |
| 5.60  | 7.33 | 1.99 | 3.88 | 2.10 | 异常   | 肝囊肿         |
| 4.92  | 6.32 | 1.31 | 3.61 | 1.59 | 未见异常 |             |
| 14.46 | 4.86 | 1.96 | 2.79 | 1.29 | 异常   | 1、脂肪肝声像；2、  |
| 5.36  | 3.66 | 1.33 | 1.62 | 1.50 | 未见异常 |             |
| 5.20  | 4.19 | 1.22 | 2.37 | 1.22 | 异常   | 肝内囊性回声（考虑   |
| 8.56  | 5.44 | 5.27 | 2.03 | 1.43 | 异常   | 1、脂肪肝声像2、肝  |
| 7.13  | 6.49 | 1.46 | 3.96 | 1.74 | 异常   | 脂肪肝声像       |
| 5.19  | 4.88 | 1.16 | 1.99 | 2.10 | 未见异常 |             |
| 5.45  | 5.02 | 2.71 | 2.44 | 1.69 | 异常   | 轻度脂肪肝声像     |
| 4.77  | 8.31 | 2.64 | 4.34 | 1.93 | 异常   | 轻度脂肪肝声像；肝   |
| 5.91  | 6.68 | 9.10 | 1.47 | 1.12 | 异常   | 脂肪肝声像       |
| 6.39  | 6.57 | 3.56 | 3.32 | 1.67 | 未见异常 |             |
| 4.52  | 4.78 | 1.26 | 2.24 | 1.68 | 未见异常 |             |
| 5.07  | 8.32 | 0.86 | 4.46 | 2.21 | 未见异常 |             |
| 5.03  | 4.70 | 1.96 | 2.35 | 1.38 | 异常   | 1、轻度脂肪肝声像；  |
| 7.79  | 8.38 | 3.68 | 4.37 | 1.75 | 异常   | 轻度脂肪肝声像     |
| 5.37  | 5.08 | 1.88 | 2.99 | 1.20 | 异常   | 胆囊内强回声（考虑   |
| 5.42  | 6.90 | 0.89 | 3.64 | 2.10 | 未见异常 |             |
| 5.00  | 6.31 | 2.78 | 3.05 | 1.75 | 异常   | 脂肪肝声像       |
| 4.61  | 6.24 | 1.75 | 3.46 | 1.39 | 异常   | 脂肪肝声像、肝内小   |
| 4.28  | 5.56 | 3.79 | 2.64 | 1.59 | 异常   | 1.轻度脂肪肝声像2. |
| 5.42  | 5.61 | 1.61 | 2.23 | 2.17 | 异常   | 肝实质回声增粗，请   |
| 4.80  | 4.62 | 2.63 | 2.38 | 1.40 |      |             |
| 4.27  | 6.74 | 1.13 | 3.57 | 1.96 | 未见异常 |             |
| 4.96  | 6.66 | 2.03 | 2.23 | 2.23 | 未见异常 |             |
| 5.39  | 5.98 | 1.68 | 3.63 | 1.49 |      |             |
| 5.27  | 8.97 | 2.88 | 5.35 | 1.82 |      |             |
| 5.53  | 6.37 | 1.87 | 3.97 | 1.46 | 异常   | 脂肪肝声像       |
| 7.77  | 7.98 | 1.58 | 4.86 | 1.70 | 异常   | 脂肪肝声像；胆囊内   |
| 5.81  | 3.79 | 1.69 | 1.59 | 1.44 | 未见异常 |             |
| 6.50  | 4.44 | 1.46 | 2.09 | 1.61 | 未见异常 |             |
| 5.27  | 5.39 | 1.42 | 2.68 | 1.86 |      |             |
| 6.00  | 5.36 | 0.94 | 2.85 | 1.76 | 未见异常 |             |
| 4.91  | 4.17 | 0.80 | 1.67 | 1.86 | 未见异常 |             |
| 4.78  | 5.82 | 3.93 | 2.54 | 1.65 |      |             |
| 5.16  | 5.55 | 0.90 | 3.36 | 1.60 | 异常   | 肝囊肿         |
| 7.49  | 5.57 | 1.38 | 3.20 | 1.63 | 异常   | 肝多发囊肿、胆囊稍   |
| 4.89  | 5.96 | 0.73 | 2.72 | 2.22 | 异常   | 1、胆囊内强回声（   |
| 5.25  | 4.57 | 1.78 | 2.38 | 4.53 |      |             |

|       |      |       |      |      |      |            |
|-------|------|-------|------|------|------|------------|
| 4.59  | 6.65 | 1.10  | 2.67 | 2.51 | 异常   | 肝内囊性回声（考虑  |
| 5.68  | 6.36 | 5.09  | 2.45 | 1.67 | 异常   | 脂肪肝声像、肝囊肿  |
| 8.93  | 5.06 | 4.92  | 2.02 | 1.25 |      |            |
| 16.63 | 8.86 | 5.93  | 3.45 | 1.75 | 异常   | 脂肪肝声像      |
| 5.21  | 5.60 | 1.10  | 2.41 | 2.10 | 未见异常 |            |
| 5.42  | 6.33 | 2.14  | 3.44 | 1.70 | 异常   | 轻度脂肪肝声像，胆  |
| 5.92  | 6.12 | 0.98  | 3.45 | 1.82 | 异常   | 肝实质回声稍粗    |
| 5.74  | 4.96 | 1.52  | 2.13 | 2.00 | 异常   | 胆囊内强回声（考虑  |
| 5.41  | 5.32 | 0.61  | 2.78 | 1.85 | 异常   | 1.肝内外胆管强回声 |
| 8.08  | 5.02 | 1.86  | 2.88 | 1.39 | 异常   | 轻度脂肪肝声像    |
| 5.09  | 5.47 | 1.40  | 2.55 | 2.09 | 未见异常 |            |
| 5.22  | 5.51 | 1.27  | 3.17 | 1.70 | 未见异常 |            |
| 6.10  | 6.15 | 1.79  | 3.00 | 2.20 | 未见异常 |            |
| 5.09  | 6.77 | 2.25  | 4.37 | 1.46 | 异常   | 肝内强回声斑，考虑  |
| 5.24  | 5.23 | 2.53  | 2.45 | 1.83 | 异常   | 脂肪肝声像      |
| 6.70  | 5.92 | 1.34  | 3.00 | 1.91 | 异常   | 轻度脂肪肝声像    |
| 4.83  | 8.84 | 23.04 | 1.56 | 0.88 | 异常   | 胆囊内似见强回声（  |
| 10.18 | 5.95 | 1.72  | 3.29 | 1.78 |      |            |
| 7.63  | 5.77 | 1.27  | 2.30 | 2.37 | 异常   | 胆囊内强回声（考虑  |
| 5.70  | 4.25 | 1.46  | 2.23 | 1.33 | 异常   | 肝内稍强回声结节（  |
| 4.85  | 5.05 | 1.06  | 2.92 | 1.62 |      |            |
| 9.09  | 6.20 | 2.01  | 3.68 | 1.52 |      |            |
| 5.54  | 5.31 | 0.93  | 1.89 | 2.54 | 未见异常 |            |
| 4.98  | 5.55 | 1.24  | 3.21 | 1.64 | 异常   | 轻度脂肪肝声像、肝  |
| 5.62  | 3.75 | 1.19  | 1.67 | 1.62 | 未见异常 |            |
| 5.43  | 3.06 | 0.74  | 1.09 | 1.59 | 异常   | 脂肪肝声像      |
| 6.50  | 6.49 | 2.28  | 3.61 | 1.74 | 异常   | 1、脂肪肝声像；2、 |
| 4.59  | 4.78 | 1.46  | 2.69 | 1.29 | 异常   | 胆囊壁胆固醇结晶沉  |
| 8.32  | 3.79 | 0.90  | 1.67 | 1.53 | 未见异常 |            |
| 4.90  | 8.74 | 4.75  | 4.26 | 1.99 |      |            |
| 4.93  | 6.94 | 1.39  | 3.87 | 1.83 | 异常   | 胆囊结石       |
| 4.88  | 4.12 | 1.75  | 2.12 | 1.31 | 异常   | 所示范围内肝实质回  |
| 4.66  | 5.34 | 0.90  | 2.42 | 1.92 | 异常   | 肝实质回声稍粗    |
| 6.22  | 9.00 | 9.83  | 2.36 | 1.36 | 异常   | 1、脂肪肝声像；2、 |
| 4.76  | 6.79 | 2.14  | 4.09 | 1.72 | 异常   | 1、脂肪肝声像；2、 |
| 5.85  | 5.67 | 1.61  | 3.07 | 1.62 | 异常   | 脂肪肝声像      |
| 6.52  | 4.01 | 2.68  | 1.72 | 1.57 | 异常   | 脂肪肝声像；胆囊内  |
| 6.61  | 7.09 | 1.66  | 4.44 | 1.71 | 异常   | 肝囊肿        |
| 5.23  | 6.89 | 1.60  | 3.89 | 1.70 | 异常   | 肝内囊性回声（考虑  |
| 5.46  | 4.33 | 0.88  | 2.60 | 1.00 | 异常   | 脂肪肝声像      |
| 4.77  | 5.17 | 1.65  | 2.28 | 1.92 | 异常   | 胆囊内异常回声，请  |
| 5.99  | 6.39 | 0.84  | 3.94 | 1.81 |      |            |
| 5.59  | 6.93 | 3.40  | 3.06 | 1.44 | 异常   | 脂肪肝声像      |
| 4.85  | 3.92 | 1.61  | 2.04 | 1.32 | 未见异常 |            |
| 5.81  | 5.01 | 1.40  | 2.74 | 1.38 |      |            |
| 6.03  | 5.97 | 1.18  | 3.26 | 1.77 | 异常   | 脂肪肝声像      |
| 5.40  | 5.21 | 7.73  | 1.20 | 1.02 | 未见异常 |            |
| 15.80 | 5.59 | 4.39  | 2.85 | 1.12 | 未见异常 |            |
| 4.39  | 3.95 | 0.79  | 1.95 | 1.50 |      |            |
| 5.04  | 6.08 | 3.52  | 3.08 | 1.58 | 异常   | 脂肪肝声像      |
| 5.02  | 5.13 | 1.59  | 2.82 | 1.39 | 异常   | 轻度脂肪肝声像    |

|       |      |      |      |      |      |               |
|-------|------|------|------|------|------|---------------|
| 4.74  | 5.81 | 2.44 | 3.20 | 1.38 | 异常   | 轻度脂肪肝声像       |
| 5.74  | 5.70 | 7.85 | 1.44 | 1.20 | 异常   | 脂肪肝声像。        |
| 5.76  | 6.28 | 1.90 | 3.87 | 1.46 | 异常   | 腹部B超；脂肪肝声像    |
| 5.14  | 5.57 | 1.84 | 2.92 | 1.50 | 异常   | 脂肪肝声像，胆囊内     |
| 6.35  | 5.20 | 3.74 | 2.67 | 1.34 | 异常   | 脂肪肝声像，胆囊结     |
| 6.39  | 3.74 | 1.28 | 1.86 | 1.43 | 异常   | 轻度脂肪肝声像       |
| 7.98  | 6.24 | 1.98 | 3.86 | 1.37 | 异常   | 1、脂肪肝声像；2、    |
| 6.39  | 7.63 | 2.60 | 4.50 | 1.77 | 异常   | 脂肪肝声像         |
| 4.94  | 4.97 | 1.71 | 2.18 | 1.87 | 未见异常 |               |
| 4.76  | 4.89 | 0.43 | 2.52 | 1.57 | 未见异常 |               |
| 4.64  | 4.85 | 1.80 | 2.44 | 1.37 | 异常   | 轻度脂肪肝声像       |
| 4.64  | 5.83 | 0.79 | 3.08 | 1.90 | 异常   | 肝囊肿           |
| 5.93  | 5.18 | 1.10 | 2.93 | 1.44 | 异常   | 轻度脂肪肝声像       |
| 5.70  | 4.89 | 1.74 | 2.54 | 1.57 | 异常   | 1、脂肪肝声像、2、    |
| 5.34  | 4.50 | 0.99 | 2.43 | 1.46 | 异常   | 1、脂肪肝声像2、肝    |
| 6.19  | 7.55 | 1.03 | 3.73 | 2.54 | 异常   | 胆囊息肉样病变       |
| 5.06  | 5.12 | 5.99 | 1.60 | 1.22 | 异常   | 轻度脂肪肝声像       |
| 5.40  | 4.60 | 2.10 | 2.63 | 1.18 | 异常   | 1、脂肪肝声像 2、肝   |
| 4.83  | 6.41 | 1.14 | 3.66 | 1.60 | 未见异常 |               |
| 4.57  | 6.13 | 1.57 | 3.67 | 1.60 | 异常   | 肝囊肿           |
| 5.11  | 6.94 | 2.24 | 4.07 | 1.56 | 异常   | 轻度脂肪肝声像、肝     |
| 4.51  | 5.30 | 1.27 | 2.99 | 1.55 | 未见异常 |               |
| 4.95  | 5.89 | 3.83 | 2.53 | 1.63 | 异常   | 1、肝囊肿2、肝内引    |
| 16.70 | 4.89 | 2.00 | 2.59 | 1.53 | 异常   | 脂肪肝声像         |
| 5.27  | 5.96 | 3.13 | 3.00 | 1.26 | 未见异常 |               |
| 5.15  | 6.55 | 1.27 | 4.00 | 1.43 | 异常   | 脂肪肝声像、胆囊结     |
| 4.95  | 6.80 | 1.72 | 4.60 | 1.74 | 未见异常 |               |
| 5.07  | 6.58 | 1.53 | 3.69 | 1.64 | 异常   | 轻度脂肪肝         |
| 6.82  | 7.67 | 1.79 | 4.51 | 1.74 | 异常   | 脂肪肝声像         |
| 5.48  | 8.38 | 1.58 | 4.74 | 2.11 | 未见异常 |               |
| 11.80 | 6.23 | 1.78 | 3.84 | 1.48 | 异常   | 1. 脂肪肝声像2. 胆囊 |
| 6.70  | 8.12 | 1.59 | 4.68 | 1.86 | 未见异常 |               |
| 5.65  | 5.70 | 2.08 | 3.27 | 1.42 | 异常   | 腹部B超； 1. 脂肪肝声 |
| 5.38  | 5.50 | 3.15 | 2.81 | 1.61 | 异常   | 脂肪肝声像         |
| 5.55  | 5.18 | 1.02 | 2.67 | 1.65 | 异常   | 腹部B超；胆囊内强回    |
| 9.27  | 7.28 | 2.13 | 4.27 | 1.84 | 异常   | 脂肪肝声像         |
| 5.12  | 6.01 | 0.98 | 3.00 | 1.92 | 未见异常 |               |
| 10.36 | 5.97 | 2.69 | 3.23 | 1.37 | 未见异常 |               |
| 4.94  | 5.45 | 1.55 | 2.47 | 1.84 | 未见异常 |               |
| 4.82  | 5.55 | 3.91 | 2.71 | 1.59 |      |               |
| 5.28  | 6.24 | 2.19 | 3.49 | 1.49 | 异常   | 胆囊内强回声（考虑     |
| 5.05  | 6.67 | 2.43 | 3.48 | 1.84 | 异常   | 轻度脂肪肝声像       |
| 5.08  | 6.69 | 0.78 | 3.72 | 2.01 | 未见异常 |               |
| 5.02  | 7.75 | 1.53 | 4.75 | 2.08 | 未见异常 |               |
| 5.42  | 3.89 | 0.68 | 1.88 | 1.24 | 未见异常 |               |
| 10.18 | 4.08 | 2.11 | 2.08 | 1.34 | 异常   | 1、脂肪肝声像；2、    |
| 5.39  | 6.04 | 1.39 | 3.14 | 1.79 | 异常   | 肝内多发囊性回声（     |
| 4.32  | 5.91 | 0.83 | 2.82 | 2.05 | 未见异常 |               |
| 5.93  | 5.44 | 1.75 | 3.01 | 1.51 | 异常   | 1. 脂肪肝声像；2 .  |
| 6.48  | 6.40 | 1.22 | 3.98 | 1.57 | 未见异常 |               |
| 5.53  | 6.22 | 1.22 | 3.56 | 1.59 | 异常   | 轻度脂肪肝声像       |

|       |      |      |      |      |      |            |
|-------|------|------|------|------|------|------------|
| 4.87  | 5.83 | 5.50 | 2.07 | 1.33 | 异常   | 腹部B超：胆囊切除术 |
| 4.76  | 4.90 | 2.04 | 2.62 | 1.50 | 未见异常 |            |
| 4.69  | 5.80 | 1.30 | 3.45 | 1.61 | 异常   | 轻度脂肪肝声像    |
| 5.28  | 4.18 | 0.90 | 1.99 | 1.59 | 异常   | 肝囊肿        |
| 4.92  | 6.22 | 1.92 | 3.78 | 1.64 | 异常   | 脂肪肝声像      |
| 6.23  | 6.68 | 1.69 | 3.98 | 1.95 | 异常   | 脂肪肝声像，肝囊肿  |
| 5.46  | 6.24 | 1.35 | 2.95 | 2.04 | 异常   | 脂肪肝声像      |
| 4.99  | 5.69 | 3.59 | 2.74 | 1.26 | 未见异常 |            |
| 5.23  | 4.99 | 0.69 | 2.85 | 1.76 | 异常   | 胆囊结石       |
| 5.22  | 5.91 | 1.28 | 3.57 | 1.47 | 未见异常 |            |
| 6.97  | 5.86 | 1.58 | 3.27 | 1.91 |      |            |
| 4.48  | 3.40 | 1.71 | 1.23 | 1.57 | 异常   | 轻度脂肪肝声像。   |
| 5.30  | 5.84 | 0.96 | 3.36 | 1.39 | 异常   | 1.轻度脂肪肝声像  |
| 4.93  | 5.85 | 1.42 | 2.98 | 2.03 | 异常   | 肝实质回声稍粗    |
| 4.47  | 5.51 | 1.81 | 2.73 | 1.60 |      |            |
| 5.06  | 5.11 | 1.49 | 2.10 | 2.05 | 异常   | 1.胆囊切除术后声像 |
| 5.32  | 6.14 | 0.77 | 2.84 | 2.33 | 未见异常 |            |
| 6.60  | 5.57 | 0.80 | 3.43 | 1.46 | 异常   | 脂肪肝声像，肝内强  |
| 6.28  | 5.96 | 3.51 | 3.15 | 1.48 | 异常   | 轻度脂肪肝声像    |
| 8.36  | 6.35 | 2.89 | 3.47 | 1.67 | 异常   | 轻度脂肪肝声像    |
| 7.03  | 4.40 | 1.46 | 2.40 | 1.39 |      |            |
| 4.92  | 5.55 | 1.60 | 3.03 | 1.67 | 未见异常 |            |
| 4.59  | 3.42 | 0.82 | 1.38 | 1.43 |      |            |
| 4.95  | 6.31 | 1.46 | 3.44 | 1.90 | 异常   | 肝实质回声稍粗    |
| 5.90  | 5.51 | 1.60 | 2.43 | 1.95 | 未见异常 |            |
| 8.99  | 4.59 | 1.74 | 2.16 | 1.64 | 异常   | 胆囊切除术后。    |
| 5.22  | 5.94 | 0.92 | 3.51 | 1.66 | 异常   | 肝囊肿；脾内点状强  |
| 7.46  | 7.25 | 2.75 | 4.45 | 1.54 | 异常   | 轻度脂肪肝声像    |
| 5.28  | 4.85 | 1.98 | 2.59 | 1.63 | 异常   | 脂肪肝声像      |
| 5.78  | 7.37 | 2.64 | 4.28 | 1.72 | 异常   | 轻度脂肪肝声像    |
| 5.17  | 6.26 | 3.76 | 3.10 | 1.66 | 异常   | 轻度脂肪肝声像。   |
| 5.38  | 4.48 | 1.27 | 2.26 | 1.47 | 异常   | 脂肪肝声像、肝内囊  |
| 4.85  | 7.11 | 2.19 | 4.14 | 1.61 | 异常   | 轻度脂肪肝声像    |
| 5.22  | 5.48 | 1.01 | 2.93 | 1.90 | 异常   | 1、肝内稍强回声小结 |
| 6.11  | 5.16 | 0.94 | 3.00 | 1.58 | 异常   | 脂肪肝声像      |
| 4.46  | 5.45 | 1.31 | 3.13 | 1.55 |      |            |
| 16.69 | 7.21 | 6.40 | 2.54 | 1.67 |      |            |
| 7.07  | 6.39 | 2.25 | 3.08 | 1.84 | 异常   | 轻度脂肪肝声像。   |
| 7.08  | 6.20 | 3.46 | 3.28 | 1.48 | 异常   | 轻度脂肪肝声像    |
| 6.50  | 5.37 | 2.00 | 2.97 | 1.28 | 未见异常 |            |
| 5.12  | 5.38 | 1.03 | 2.99 | 1.54 | 未见异常 |            |
| 4.65  | 4.34 | 1.48 | 2.10 | 1.48 | 未见异常 |            |
| 6.67  | 5.33 | 2.18 | 2.86 | 1.52 | 异常   | 肝内囊性回声（考虑  |
| 4.91  | 6.17 | 2.74 | 3.46 | 1.47 | 异常   | 脂肪肝声像。肝内多  |
| 5.02  | 6.12 | 0.74 | 2.93 | 2.34 | 异常   | 肝囊肿        |
| 4.63  | 5.95 | 1.53 | 3.36 | 1.63 | 异常   | 轻度脂肪肝声像    |
| 5.60  | 6.53 | 2.67 | 3.74 | 1.27 | 异常   | 脂肪肝、肝囊肿？   |
| 5.03  | 5.71 | 0.95 | 3.34 | 1.57 | 未见异常 |            |
| 6.01  | 5.00 | 0.99 | 2.51 | 1.76 | 异常   | 肝囊肿；       |
| 6.73  | 4.22 | 1.20 | 2.33 | 1.38 | 异常   | 轻度脂肪肝声像    |
| 4.63  | 7.22 | 2.49 | 3.78 | 1.91 | 未见异常 |            |

|       |      |       |      |      |      |            |
|-------|------|-------|------|------|------|------------|
| 6.74  | 4.43 | 1.81  | 1.47 | 1.97 | 异常   | 肝内囊性回声（考虑  |
| 5.47  | 4.76 | 1.20  | 2.58 | 1.61 | 未见异常 |            |
| 5.62  | 5.87 | 3.07  | 3.17 | 1.61 | 未见异常 |            |
| 4.75  | 5.79 | 1.02  | 3.40 | 1.61 | 异常   | 胆囊切除术后声像改  |
| 7.50  | 6.31 | 0.81  | 3.23 | 2.29 | 异常   | 1、肝实质回声稍粗； |
| 5.22  | 3.09 | 3.09  | 4.28 | 1.57 | 异常   | 脂肪肝声像      |
| 5.58  | 5.38 | 1.56  | 3.25 | 1.55 | 异常   | 胆囊泥沙样结石？   |
| 5.12  | 6.80 | 2.08  | 4.03 | 1.60 | 异常   | 脂肪肝声像      |
| 4.44  | 5.83 | 1.27  | 3.42 | 1.55 | 异常   | 胆囊结石       |
| 5.21  | 5.79 | 2.11  | 3.15 | 1.51 | 异常   | 脂肪肝声像      |
| 4.91  | 5.30 | 0.86  | 3.26 | 1.33 | 异常   | 肝囊肿        |
| 5.89  | 4.66 | 2.00  | 2.56 | 1.29 | 未见异常 |            |
| 5.94  | 6.49 | 2.96  | 3.40 | 1.61 | 未见异常 |            |
| 5.10  | 5.12 | 0.96  | 2.87 | 1.40 | 异常   | 腹部B超：胆囊内强回 |
| 4.88  | 5.38 | 2.49  | 3.04 | 1.34 | 异常   | 1、肝内强回声斑；  |
| 5.10  | 6.68 | 0.60  | 3.29 | 2.13 | 异常   | 胆多囊性回声（考虑  |
| 5.19  | 4.79 | 1.93  | 2.21 | 1.51 | 异常   | 轻度脂肪肝声像、肝  |
| 12.42 | 6.42 | 7.43  | 2.00 | 1.35 | 异常   | 脂肪肝声像      |
| 5.25  | 3.75 | 1.34  | 1.78 | 1.44 | 未见异常 |            |
| 23.60 | 7.23 | 3.26  | 3.97 | 5.74 |      |            |
| 5.56  | 7.92 | 11.55 | 1.65 | 1.37 | 异常   | 脂肪肝        |
| 4.70  | 5.23 | 0.87  | 3.11 | 1.54 | 异常   | 1、胆囊结石。    |
| 5.22  | 4.50 | 2.04  | 2.23 | 1.54 | 异常   | 肝实质回声稍粗    |
| 4.96  | 6.06 | 2.90  | 3.18 | 1.58 | 未见异常 |            |
| 5.40  | 5.52 | 1.04  | 3.25 | 1.56 | 异常   | 胆囊强回声，结石？  |
| 4.93  | 4.28 | 0.79  | 2.01 | 1.45 | 未见异常 |            |
| 4.96  | 4.67 | 0.58  | 1.96 | 2.02 |      |            |
| 8.03  | 8.39 | 3.78  | 4.80 | 1.82 | 异常   | 胆囊内强回声（考虑  |
| 5.34  | 7.77 | 2.72  | 4.23 | 1.56 | 异常   | 肝内强回声斑：考虑  |
| 4.91  | 6.10 | 1.62  | 3.27 | 1.85 |      |            |
| 5.37  | 6.36 | 0.68  | 3.55 | 1.93 | 未见异常 |            |
| 4.21  | 6.71 | 0.79  | 3.41 | 2.36 | 未见异常 |            |
| 5.23  | 4.85 | 1.73  | 2.58 | 1.53 | 未见异常 |            |
| 9.09  | 5.37 | 1.23  | 3.07 | 1.59 | 异常   | 所示范围内脂肪肝声  |
| 5.04  | 5.02 | 1.56  | 3.02 | 1.31 | 异常   | 脂肪肝声像，肝囊肿  |
| 6.54  | 4.71 | 2.47  | 2.34 | 1.39 |      |            |
| 6.44  | 6.08 | 2.04  | 2.97 | 1.89 | 异常   | 脂肪肝声像      |
| 6.12  | 5.84 | 1.45  | 3.75 | 1.40 | 异常   | 1、脂肪肝声像；2、 |
| 5.14  | 5.14 | 2.12  | 2.73 | 1.67 | 异常   | 脂肪肝声像。     |
| 4.59  | 8.10 | 1.58  | 4.60 | 2.07 | 异常   | 轻度脂肪肝声像；胆  |
| 5.26  | 4.88 | 4.13  | 2.03 | 1.36 |      |            |
| 4.71  | 5.89 | 2.63  | 3.30 | 1.69 | 异常   | 轻度脂肪肝声像    |
| 5.42  | 4.41 | 1.67  | 2.25 | 1.60 | 异常   | 轻度脂肪肝声像    |
| 6.90  | 5.02 | 1.02  | 2.55 | 1.74 |      |            |
| 7.32  | 4.04 | 2.08  | 1.97 | 1.27 | 未见异常 |            |
| 5.71  | 7.32 | 2.13  | 4.65 | 1.61 | 异常   | 脂肪肝声像      |
| 4.58  | 6.12 | 0.98  | 3.66 | 1.54 | 未见异常 |            |
| 7.08  | 5.56 | 7.06  | 1.57 | 1.07 | 异常   | 脂肪肝声像 肝内引  |
| 4.82  | 6.39 | 1.21  | 4.05 | 1.55 |      |            |
| 5.84  | 7.98 | 2.86  | 4.48 | 1.87 | 异常   | 脂肪肝声像      |
| 6.97  | 3.11 | 1.91  | 1.14 | 1.35 |      |            |

|       |      |      |      |      |      |                |
|-------|------|------|------|------|------|----------------|
| 4.96  | 3.56 | 1.44 | 1.90 | 1.12 | 未见异常 |                |
| 4.79  | 9.04 | 1.13 | 5.54 | 2.14 | 异常   | 脂肪肝声像          |
| 6.41  | 7.09 | 1.27 | 4.27 | 1.90 |      |                |
| 5.34  | 4.99 | 1.91 | 2.62 | 1.51 | 异常   | 1. 脂肪肝声像, 2. 胆 |
| 7.75  | 5.86 | 1.38 | 3.49 | 1.52 | 异常   | 1、脂肪肝声像2、肝     |
| 5.35  | 6.74 | 1.41 | 4.38 | 1.43 | 异常   | 轻度脂肪肝声像; 肝     |
| 4.86  | 5.55 | 0.81 | 3.38 | 1.52 | 异常   | 轻度脂肪肝声像        |
| 5.26  | 5.46 | 1.11 | 3.50 | 1.29 | 异常   | 肝实质回声稍粗        |
| 9.90  | 4.84 | 1.56 | 2.64 | 1.53 |      |                |
| 4.75  | 5.42 | 1.97 | 2.82 | 1.69 | 未见异常 |                |
| 6.09  | 9.35 | 4.35 | 5.09 | 1.71 | 异常   | 脂肪肝声像          |
| 6.18  | 6.21 | 8.44 | 1.15 | 0.91 |      |                |
| 5.81  | 6.29 | 1.08 | 3.47 | 1.83 |      |                |
| 4.63  | 6.48 | 2.21 | 3.69 | 1.71 | 异常   | 肝实质回声稍粗        |
| 5.16  | 6.37 | 1.42 | 3.91 | 1.47 | 异常   | 肝内囊性回声(考虑      |
| 6.84  | 7.94 | 3.89 | 4.26 | 1.65 | 异常   | 脂肪肝声像          |
| 4.66  | 4.14 | 1.51 | 2.21 | 3.37 | 未见异常 |                |
| 5.79  | 5.80 | 2.30 | 3.13 | 1.58 | 未见异常 |                |
| 8.46  | 4.70 | 4.45 | 2.01 | 1.13 | 异常   | 脂肪肝声像          |
| 5.56  | 6.62 | 2.32 | 3.61 | 1.63 | 异常   | 腹部B超, 胆囊结石     |
| 5.13  | 5.75 | 1.04 | 2.56 | 2.33 | 未见异常 |                |
| 5.68  | 7.38 | 1.69 | 4.46 | 1.63 | 异常   | 肝实质回声稍粗        |
| 5.18  | 3.95 | 6.45 | 1.12 | 0.86 | 异常   | 轻度脂肪肝声像、胆      |
| 4.88  | 6.21 | 0.96 | 2.91 | 2.36 | 未见异常 |                |
| 5.52  | 7.93 | 2.70 | 4.95 | 1.96 | 异常   | 脂肪肝声像          |
| 6.17  | 4.66 | 1.16 | 2.35 | 1.63 | 异常   | 肝内强回声斑: 考虑     |
| 5.17  | 3.75 | 0.89 | 1.25 | 2.06 | 未见异常 |                |
| 6.52  | 5.82 | 2.13 | 3.35 | 1.52 | 异常   | 脂肪肝声像、肝囊肿      |
| 4.23  | 6.70 | 2.94 | 2.67 | 2.13 | 未见异常 |                |
| 6.88  | 4.95 | 2.92 | 2.85 | 1.01 |      |                |
| 4.70  | 5.41 | 0.54 | 2.52 | 1.95 | 异常   | 肝内囊性回声(考虑      |
| 4.77  | 5.94 | 0.55 | 3.10 | 2.15 | 异常   | 肝多发囊肿          |
| 6.34  | 7.31 | 2.56 | 4.03 | 1.59 | 未见异常 |                |
| 5.10  | 7.43 | 0.94 | 3.69 | 2.20 | 未见异常 |                |
| 4.59  | 4.58 | 1.39 | 2.43 | 1.50 | 异常   | 轻度脂肪肝声像        |
| 6.76  | 4.49 | 2.05 | 1.64 | 1.94 | 异常   | 脂肪肝声像          |
| 5.08  | 4.85 | 1.17 | 2.48 | 1.59 | 异常   | 肝右叶稍强回声结节      |
| 7.39  | 5.91 | 3.43 | 2.97 | 1.64 | 异常   | 脂肪肝声像          |
| 7.69  | 7.13 | 4.19 | 3.58 | 1.61 | 异常   | 1、脂肪肝声像; 2、    |
| 6.84  | 5.80 | 0.93 | 2.61 | 2.23 | 未见异常 |                |
| 5.00  | 0.83 | 4.42 | 2.28 | 1.46 | 未见异常 |                |
| 5.92  | 5.39 | 0.94 | 2.91 | 1.75 | 异常   | 胆囊内强回声(考虑      |
| 5.83  | 5.29 | 2.27 | 2.60 | 1.80 | 未见异常 |                |
| 10.76 | 6.92 | 0.90 | 3.20 | 2.13 | 未见异常 |                |
| 4.81  | 5.95 | 1.82 | 3.14 | 1.83 | 异常   | 肝囊肿            |
| 4.89  | 7.81 | 2.65 | 4.43 | 1.71 | 异常   | 腹部B超; 胆囊内强[    |
| 4.49  | 4.92 | 1.05 | 2.64 | 1.66 | 未见异常 |                |
| 5.80  | 4.70 | 2.55 | 2.37 | 1.32 |      |                |
| 5.53  | 6.09 | 2.56 | 3.40 | 1.62 | 异常   | 1. 肝内囊性回声(考    |
| 4.42  | 6.46 | 1.21 | 3.38 | 2.12 | 异常   | 腹部B超; 1. 脂肪肝   |
| 7.50  | 4.75 | 1.64 | 2.50 | 1.42 | 异常   | 脂肪肝声像          |

|       |      |      |      |      |      |               |
|-------|------|------|------|------|------|---------------|
| 4.71  | 5.87 | 0.85 | 3.31 | 1.68 | 未见异常 |               |
| 6.61  | 5.27 | 1.70 | 3.02 | 1.27 | 异常   | 1. 脂肪肝声像2. 肝内 |
| 6.01  | 5.53 | 1.62 | 2.78 | 1.83 | 异常   | 脂肪肝声像         |
| 6.38  | 4.63 | 1.67 | 1.80 | 1.95 | 未见异常 |               |
| 6.03  | 8.87 | 1.07 | 5.10 | 2.57 | 异常   | 轻度脂肪肝         |
| 4.91  | 5.30 | 1.14 | 2.91 | 1.80 | 未见异常 |               |
| 4.46  | 5.05 | 0.88 | 2.67 | 1.74 | 未见异常 |               |
| 5.58  | 5.95 | 1.34 | 3.26 | 1.72 | 未见异常 |               |
| 7.92  | 6.05 | 1.86 | 3.63 | 1.32 | 异常   | 脂肪肝声像         |
| 8.10  | 6.05 | 2.00 | 3.47 | 1.70 | 异常   | 1. 胆囊切除术后声像   |
| 4.42  | 4.68 | 1.38 | 1.93 | 1.98 |      |               |
| 4.57  | 4.13 | 0.57 | 1.56 | 2.05 | 未见异常 |               |
| 7.49  | 8.98 | 6.51 | 2.41 | 1.86 | 异常   | 1、脂肪肝声像；2、    |
| 6.01  | 6.48 | 1.28 | 3.01 | 2.27 | 未见异常 |               |
| 6.92  | 6.53 | 2.42 | 3.49 | 1.63 | 异常   | 脂肪肝声像         |
| 5.22  | 6.03 | 2.65 | 2.93 | 4.16 | 异常   | 脂肪肝声像         |
| 5.51  | 6.43 | 1.40 | 3.66 | 1.78 |      |               |
| 4.87  | 5.77 | 1.02 | 3.36 | 1.62 | 未见异常 |               |
| 7.27  | 5.75 | 1.36 | 3.66 | 1.45 | 异常   | 脂肪肝声像         |
| 5.03  | 5.01 | 1.49 | 2.46 | 1.94 | 未见异常 |               |
| 5.22  | 6.67 | 1.32 | 3.62 | 1.85 | 未见异常 |               |
| 4.91  | 4.21 | 0.97 | 1.40 | 2.23 | 异常   | 1、肝实质回声稍粗；    |
| 5.63  | 5.07 | 1.35 | 2.84 | 1.36 | 未见异常 |               |
| 4.53  | 6.41 | 3.18 | 3.34 | 1.73 | 未见异常 |               |
| 4.81  | 4.98 | 1.28 | 2.28 | 2.00 | 未见异常 |               |
| 4.79  | 4.09 | 1.42 | 1.42 | 1.97 |      |               |
| 5.06  | 3.73 | 1.37 | 1.36 | 1.89 | 异常   | 肝内强回声斑（考虑     |
| 6.01  | 7.00 | 3.48 | 3.12 | 1.95 |      |               |
| 4.83  | 5.54 | 1.53 | 2.98 | 1.45 | 异常   | 腹部B超：1. 轻度脂肪  |
| 10.43 | 4.87 | 1.31 | 2.76 | 1.55 | 异常   | 1、轻度脂肪肝声像；    |
| 5.51  | 5.35 | 1.82 | 3.05 | 1.33 | 未见异常 |               |
| 5.28  | 4.46 | 0.68 | 1.60 | 2.21 | 异常   | 腹部B超；1. 胆囊切   |
| 5.39  | 8.21 | 2.48 | 5.04 | 1.70 | 异常   | 轻度脂肪肝声像       |
| 5.97  | 7.28 | 3.00 | 3.91 | 1.68 |      |               |
| 5.26  | 5.64 | 0.47 | 3.20 | 1.96 | 异常   | 肝实质回声稍粗       |
| 4.67  | 5.91 | 0.96 | 2.96 | 2.06 | 未见异常 |               |
| 4.79  | 7.28 | 1.76 | 4.34 | 1.91 | 未见异常 |               |
| 4.98  | 5.23 | 0.75 | 2.58 | 2.02 | 异常   | 肝囊肿           |
| 3.94  | 5.71 | 2.53 | 2.88 | 1.70 | 未见异常 |               |
| 5.74  | 7.43 | 2.93 | 4.01 | 1.73 | 异常   | 1. 轻度脂肪肝声像 2  |
| 7.42  | 4.68 | 1.27 | 2.67 | 1.39 |      |               |
| 4.99  | 5.64 | 1.56 | 3.12 | 1.68 | 异常   | 1. 肝囊肿2. 胆囊多发 |
| 6.49  | 6.05 | 2.04 | 3.58 | 1.49 | 异常   | 脂肪肝声像         |
| 5.15  | 7.79 | 7.24 | 2.11 | 1.47 |      |               |
| 4.47  | 6.65 | 3.05 | 3.60 | 1.57 | 未见异常 |               |
| 5.20  | 6.94 | 1.68 | 3.92 | 1.97 | 异常   | 轻度脂肪肝声像、肝     |
| 6.45  | 5.36 | 1.69 | 2.82 | 1.51 |      |               |
| 4.53  | 5.33 | 1.25 | 2.52 | 2.09 | 未见异常 |               |
| 6.46  | 7.64 | 2.57 | 4.54 | 1.91 | 异常   | 1、脂肪肝声像；2、    |
| 5.84  | 8.77 | 2.17 | 5.45 | 1.54 | 异常   | 胆囊内强回声（考虑     |
| 6.55  | 7.53 | 1.81 | 4.06 | 2.31 | 异常   | 脂肪肝声像         |

|       |      |      |      |      |      |             |
|-------|------|------|------|------|------|-------------|
| 4.60  | 5.68 | 4.67 | 2.37 | 1.53 | 未见异常 |             |
| 8.36  | 6.47 | 1.42 | 3.73 | 1.77 | 异常   | 1、脂肪肝声像，2、  |
| 6.47  | 6.23 | 3.42 | 3.32 | 1.37 | 未见异常 |             |
| 8.09  | 4.43 | 1.30 | 2.71 | 1.15 | 异常   | 脂肪肝声像       |
| 6.31  | 3.43 | 0.97 | 1.48 | 1.13 |      |             |
| 5.44  | 5.93 | 1.78 | 2.99 | 2.01 | 异常   | 胆囊切除术后、胆总   |
| 5.21  | 5.82 | 2.23 | 3.01 | 1.77 | 未见异常 |             |
| 11.04 | 6.43 | 3.25 | 3.59 | 1.37 | 异常   | 1、脂肪肝声像     |
| 4.79  | 5.65 | 1.28 | 3.03 | 1.69 | 未见异常 |             |
| 4.41  | 4.62 | 1.25 | 2.11 | 1.83 | 异常   | 1、肝实质回声稍粗2  |
| 5.73  | 2.96 | 1.07 | 1.27 | 1.19 |      |             |
| 7.48  | 6.20 | 1.97 | 3.27 | 1.59 | 异常   | 轻度脂肪肝声像     |
| 5.05  | 4.88 | 1.33 | 2.22 | 1.92 | 异常   | 1.肝实质回声稍粗2. |
| 4.64  | 6.12 | 1.65 | 3.05 | 1.94 | 未见异常 |             |
| 6.72  | 2.30 | 0.66 | 1.05 | 0.93 | 未见异常 |             |
| 4.76  | 6.68 | 0.80 | 3.70 | 2.00 | 异常   | 胆囊强回声团，考虑   |
| 8.59  | 5.27 | 2.09 | 2.87 | 1.53 | 未见异常 |             |
| 4.42  | 3.83 | 0.79 | 1.82 | 1.58 |      |             |
| 4.42  | 6.06 | 1.21 | 3.69 | 1.58 | 未见异常 |             |
| 6.42  | 6.84 | 2.42 | 4.06 | 1.32 |      |             |
| 4.54  | 6.06 | 0.86 | 2.80 | 2.28 | 未见异常 |             |
| 6.74  | 5.70 | 1.78 | 2.57 | 2.06 | 未见异常 |             |
| 4.84  | 4.97 | 1.16 | 2.45 | 1.74 | 未见异常 |             |
| 20.76 | 4.18 | 2.37 | 2.24 | 1.18 | 未见异常 |             |
| 4.90  | 6.08 | 2.55 | 3.26 | 1.63 | 异常   | 肝胆胰彩超：肝囊肿   |
| 6.07  | 7.17 | 1.61 | 3.98 | 1.83 | 未见异常 |             |
| 5.52  | 5.30 | 2.30 | 2.87 | 1.23 | 异常   | 1、脂肪肝声像；2、  |
| 5.79  | 7.20 | 1.80 | 4.24 | 1.95 | 异常   | 1、脂肪肝声像；2、  |
| 6.93  | 6.82 | 1.22 | 3.66 | 2.21 | 未见异常 |             |
| 5.86  | 5.95 | 0.98 | 2.83 | 2.09 | 未见异常 |             |
| 4.26  | 4.16 | 3.04 | 1.96 | 1.28 |      |             |
| 4.77  | 5.71 | 1.30 | 2.90 | 1.74 | 未见异常 |             |
| 4.75  | 7.12 | 1.92 | 3.86 | 2.14 | 未见异常 |             |
| 5.81  | 6.48 | 0.94 | 3.58 | 2.01 | 未见异常 |             |
| 5.42  | 4.64 | 3.29 | 2.24 | 1.19 | 未见异常 |             |
| 5.35  | 5.44 | 2.32 | 2.70 | 1.68 | 异常   | 轻度脂肪肝声像     |
| 4.70  | 4.65 | 1.47 | 2.53 | 1.40 | 未见异常 |             |
| 5.01  | 6.13 | 2.56 | 3.10 | 1.71 | 异常   | 脂肪肝声像       |
| 5.65  | 3.46 | 3.24 | 1.07 | 1.42 | 异常   | 脂肪肝声像；      |
| 4.98  | 4.84 | 2.48 | 2.51 | 1.32 |      |             |
| 7.92  | 6.07 | 4.41 | 2.73 | 1.51 |      |             |
| 5.34  | 6.05 | 1.13 | 3.69 | 1.67 | 未见异常 |             |
| 6.42  | 5.58 | 1.84 | 3.19 | 1.51 | 未见异常 |             |
| 4.57  | 3.29 | 0.61 | 1.39 | 1.51 | 未见异常 |             |
| 8.28  | 4.58 | 1.10 | 2.53 | 1.42 | 异常   | 肝胆胰彩超：轻度脂   |
| 4.76  | 4.20 | 0.97 | 2.38 | 1.35 | 异常   | 1、胆囊内低回声区，  |
| 4.49  | 5.11 | 1.37 | 2.45 | 1.90 | 未见异常 |             |
| 7.79  | 7.82 | 6.25 | 3.45 | 1.59 | 异常   | 1脂肪肝声像2胆囊结  |
| 5.67  | 6.44 | 0.68 | 3.48 | 1.92 | 未见异常 |             |
| 5.30  | 5.33 | 1.83 | 2.93 | 1.44 | 未见异常 |             |
| 6.00  | 4.43 | 0.91 | 1.89 | 1.95 | 异常   | 脂肪肝声像。      |

|       |      |       |      |      |      |            |
|-------|------|-------|------|------|------|------------|
| 4.91  | 5.05 | 0.90  | 2.44 | 1.68 | 异常   | 胆囊息肉样病变    |
| 4.96  | 6.64 | 1.35  | 3.97 | 1.86 | 未见异常 |            |
| 7.82  | 7.37 | 3.98  | 3.95 | 1.78 | 异常   | 1、脂肪肝声像；2、 |
| 5.52  | 9.16 | 6.30  | 3.59 | 1.86 | 未见异常 |            |
| 19.68 | 6.28 | 1.57  | 3.67 | 1.46 | 未见异常 |            |
| 4.67  | 5.75 | 1.15  | 2.98 | 1.86 |      |            |
| 4.37  | 7.40 | 1.71  | 3.96 | 2.03 | 异常   | 脂肪肝声像；     |
| 6.33  | 5.64 | 2.35  | 3.10 | 1.49 | 异常   | 脂肪肝声像      |
| 7.39  | 3.54 | 1.96  | 1.83 | 1.13 | 异常   | 脂肪肝声像      |
| 6.73  | 5.80 | 1.49  | 3.39 | 1.72 | 异常   | 1、肝囊肿      |
| 6.19  | 7.02 | 2.62  | 4.03 | 1.71 | 异常   | 腹部B超：肝囊肿   |
| 13.77 | 4.05 | 2.05  | 2.04 | 1.27 | 异常   | 轻度脂肪肝声像；胆  |
| 4.88  | 8.51 | 11.96 | 1.60 | 1.08 | 异常   | 脂肪肝声像      |
| 5.14  | 5.09 | 1.83  | 2.78 | 1.19 | 异常   | 1轻度脂肪肝声像 2 |
| 6.09  | 6.52 | 3.90  | 3.22 | 1.78 |      |            |
| 4.97  | 5.49 | 1.29  | 3.32 | 1.62 | 异常   | 1.胆囊结石     |
| 4.95  | 5.56 | 0.92  | 2.38 | 2.11 | 异常   | 1肝实质回声增粗；2 |
| 4.89  | 4.35 | 1.22  | 2.10 | 1.62 | 未见异常 |            |
| 5.21  | 5.21 | 4.91  | 2.03 | 1.33 | 异常   | 脂肪肝声像      |
| 5.41  | 6.78 | 3.19  | 3.46 | 1.75 | 未见异常 |            |
| 5.14  | 6.05 | 1.54  | 3.24 | 1.91 | 异常   | 肝内稍高回声结节，  |
| 6.16  | 6.15 | 3.64  | 3.19 | 1.34 | 异常   | 1、肝内回声，不均  |
| 6.45  | 6.13 | 1.15  | 4.08 | 1.34 | 异常   | 脂肪肝声像（肝右叶  |
| 5.10  | 5.53 | 1.70  | 2.91 | 1.56 | 异常   | 轻度脂肪肝声像。   |
| 4.70  | 5.54 | 2.55  | 2.38 | 1.79 | 异常   | 轻度脂肪肝声像    |
| 4.63  | 5.64 | 0.82  | 2.96 | 1.87 | 未见异常 |            |
| 5.24  | 5.36 | 1.12  | 3.03 | 1.49 | 异常   | 肝内异常回声，不均  |
| 5.19  | 5.55 | 1.14  | 2.91 | 1.81 | 异常   | 腹部B超；胆囊稍强  |
| 15.53 | 5.95 | 1.26  | 2.76 | 2.07 |      |            |
| 4.95  | 3.59 | 0.62  | 1.50 | 1.47 | 未见异常 |            |
| 5.40  | 1.89 | 1.22  | 2.61 | 1.52 | 异常   | 脂肪肝声像      |
| 5.56  | 4.24 | 3.06  | 1.96 | 1.51 | 异常   | 轻度脂肪肝声像    |
| 5.33  | 5.03 | 4.56  | 2.08 | 1.28 | 异常   | 轻度脂肪肝声像；肝  |
| 5.99  | 4.72 | 3.75  | 2.18 | 1.33 | 未见异常 |            |
| 4.38  | 6.86 | 2.10  | 3.70 | 1.61 | 异常   | 胆囊腔内强回声团，  |
| 5.39  | 5.31 | 1.36  | 2.66 | 1.93 | 未见异常 |            |
| 5.56  | 4.95 | 2.09  | 2.60 | 1.52 | 异常   | 脂肪肝声像      |
| 5.79  | 4.27 | 0.86  | 2.32 | 1.32 |      |            |
| 4.27  | 5.69 | 0.79  | 3.49 | 1.69 | 未见异常 |            |
| 5.09  | 6.31 | 0.80  | 3.80 | 1.65 | 未见异常 |            |
| 5.25  | 4.97 | 0.61  | 2.84 | 1.52 | 异常   | 肝胆胰彩超：1、肝  |
| 4.70  | 4.96 | 1.04  | 1.30 | 2.75 | 异常   | 胆囊结石       |
| 4.81  | 3.99 | 0.99  | 1.74 | 1.66 |      |            |
| 5.25  | 4.24 | 1.32  | 1.51 | 2.00 | 未见异常 |            |
| 12.51 | 6.62 | 3.40  | 3.49 | 1.66 | 异常   | 轻度脂肪肝声像。   |
| 4.90  | 6.99 | 1.84  | 3.73 | 1.89 | 异常   | 轻度脂肪肝声像、肝  |
| 5.26  | 6.76 | 2.43  | 3.53 | 1.62 | 未见异常 |            |
| 5.56  | 6.44 | 1.83  | 4.03 | 1.57 | 异常   | 脂肪肝声像      |
| 8.20  | 4.74 | 2.34  | 1.38 | 2.23 | 异常   | 胆囊结石       |
| 6.08  | 5.18 | 0.81  | 2.69 | 1.68 | 异常   | 脂肪肝声像      |
| 5.01  | 4.84 | 0.96  | 2.29 | 1.90 | 未见异常 |            |

|       |      |       |      |      |      |              |
|-------|------|-------|------|------|------|--------------|
| 5.22  | 6.98 | 1.22  | 4.15 | 1.51 | 异常   | 轻度脂肪肝声像      |
| 6.04  | 5.49 | 0.76  | 2.70 | 2.11 |      |              |
| 7.03  | 4.26 | 1.10  | 2.31 | 1.32 |      |              |
| 5.31  | 5.85 | 0.82  | 2.72 | 1.99 | 未见异常 |              |
| 4.77  | 5.92 | 0.98  | 3.19 | 1.84 | 异常   | 轻度脂肪肝声像。     |
| 5.42  | 5.52 | 1.09  | 3.49 | 1.43 |      |              |
| 3.98  | 6.52 | 4.41  | 3.03 | 1.29 | 未见异常 |              |
| 4.99  | 6.13 | 1.65  | 3.14 | 2.08 | 异常   | 肝内小囊性回声(考    |
| 7.13  | 6.71 | 2.39  | 3.93 | 1.48 | 异常   | 1、脂肪肝声像;2、   |
| 5.79  | 4.99 | 0.97  | 2.79 | 1.55 | 异常   | 脂肪肝声像        |
| 12.73 | 4.82 | 1.74  | 2.38 | 1.47 | 异常   | 1脂肪肝声像2胆囊息   |
| 6.42  | 5.80 | 1.42  | 3.33 | 1.63 |      |              |
| 5.12  | 4.39 | 1.90  | 2.03 | 1.68 | 未见异常 |              |
| 4.76  | 8.63 | 2.21  | 4.64 | 2.45 | 异常   | 腹部B超:轻度脂肪肝   |
| 5.58  | 7.72 | 2.53  | 4.47 | 2.16 |      |              |
| 5.69  | 4.23 | 1.68  | 2.40 | 1.05 | 异常   | 脂肪肝声像        |
| 4.96  | 3.93 | 1.39  | 1.95 | 1.30 | 未见异常 |              |
| 7.41  | 4.20 | 1.69  | 1.89 | 1.38 | 异常   | 1.脂肪肝声像2.胆囊  |
| 6.93  | 5.71 | 2.19  | 3.18 | 1.65 | 异常   | 轻度脂肪肝声像      |
| 5.70  | 5.63 | 1.24  | 3.12 | 1.55 | 异常   | 腹部B超:脂肪肝声像   |
| 4.68  | 4.98 | 2.03  | 2.67 | 1.39 | 未见异常 |              |
| 7.05  | 5.02 | 3.38  | 2.55 | 1.40 | 异常   | 脂肪肝声像        |
| 4.30  | 7.38 | 1.22  | 4.05 | 2.08 | 异常   | 脂肪肝声像        |
| 6.39  | 5.84 | 6.42  | 1.78 | 1.42 | 异常   | 轻度脂肪肝声像      |
| 13.73 | 4.11 | 0.86  | 1.74 | 1.85 | 未见异常 |              |
| 4.77  | 4.98 | 0.89  | 2.57 | 1.68 | 未见异常 |              |
| 4.94  | 4.85 | 2.32  | 2.63 | 1.33 |      |              |
| 5.97  | 5.22 | 0.81  | 2.83 | 1.71 | 未见异常 |              |
| 4.71  | 3.62 | 1.33  | 1.36 | 1.53 | 未见异常 |              |
| 5.25  | 6.79 | 1.37  | 3.68 | 2.24 | 未见异常 |              |
| 6.96  | 5.86 | 4.56  | 3.19 | 1.55 | 异常   | 脂肪肝声像        |
| 4.57  | 5.34 | 4.01  | 2.54 | 1.39 | 异常   | 1.脂肪肝声像 2.肝  |
| 5.18  | 6.71 | 1.75  | 4.00 | 1.82 |      |              |
| 14.98 | 9.41 | 1.97  | 4.49 | 2.57 | 异常   | 脂肪肝声像        |
| 5.23  | 4.45 | 1.21  | 1.59 | 1.94 | 未见异常 |              |
| 4.67  | 3.98 | 1.29  | 1.90 | 1.45 | 异常   | 肝囊肿          |
| 6.30  | 2.55 | 0.94  | 0.82 | 1.20 |      |              |
| 5.37  | 5.82 | 1.52  | 3.39 | 1.59 | 异常   | 1、脂肪肝声像;2、   |
| 5.45  | 5.29 | 1.94  | 2.76 | 1.59 | 异常   | 轻度脂肪肝声像      |
| 4.98  | 6.74 | 2.24  | 4.15 | 1.39 | 未见异常 |              |
| 5.98  | 5.31 | 2.62  | 2.87 | 4.15 |      |              |
| 7.02  | 6.33 | 1.26  | 3.48 | 1.81 | 异常   | 肝实质回声稍粗      |
| 6.42  | 5.53 | 0.87  | 2.31 | 2.45 | 异常   | 轻度脂肪肝声像      |
| 4.59  | 4.68 | 1.37  | 2.62 | 1.37 |      |              |
| 5.69  | 8.80 | 19.17 | 1.45 | 1.12 | 异常   | 脂肪肝声像        |
| 12.76 | 3.00 | 1.03  | 1.11 | 1.33 | 未见异常 |              |
| 5.02  | 5.14 | 1.07  | 2.52 | 1.81 | 未见异常 |              |
| 4.60  | 5.70 | 1.02  | 2.75 | 2.11 | 异常   | 肝实质回声稍粗      |
| 5.17  | 5.06 | 1.53  | 2.32 | 1.71 | 异常   | 1 肝囊肿, 2 肝内强 |
| 15.55 | 3.97 | 1.39  | 1.97 | 1.33 | 未见异常 |              |
| 4.69  | 5.27 | 1.33  | 2.63 | 1.79 | 未见异常 |              |

|       |      |      |      |      |      |            |
|-------|------|------|------|------|------|------------|
| 5.67  | 4.52 | 1.33 | 2.66 | 1.28 | 未见异常 |            |
| 6.53  | 4.40 | 0.85 | 2.66 | 1.31 | 未见异常 |            |
| 5.60  | 6.88 | 2.71 | 4.11 | 1.70 | 未见异常 |            |
| 5.06  | 6.21 | 4.26 | 2.81 | 1.72 | 异常   | 轻度脂肪肝声像    |
| 5.34  | 6.29 | 1.68 | 3.69 | 1.76 | 异常   | 脂肪肝声像      |
| 5.02  | 5.27 | 3.07 | 2.82 | 1.28 | 异常   | 胆囊内强回声(考虑结 |
| 6.23  | 6.87 | 2.10 | 3.85 | 1.58 | 异常   | 1、胆囊多发结石;  |
| 4.84  | 6.29 | 1.44 | 3.89 | 1.63 | 未见异常 |            |
| 4.28  | 4.77 | 2.08 | 2.69 | 1.41 |      |            |
| 5.39  | 6.54 | 1.89 | 3.87 | 1.68 | 异常   | 脂肪肝声像。     |
| 5.40  | 6.88 | 6.80 | 2.33 | 1.20 | 异常   | 脂肪肝声像      |
| 5.53  | 7.12 | 2.24 | 4.29 | 1.84 |      |            |
| 4.51  | 5.99 | 1.11 | 2.95 | 2.30 | 未见异常 |            |
| 4.96  | 6.14 | 1.29 | 2.87 | 2.30 | 未见异常 |            |
| 10.14 | 5.99 | 1.30 | 3.60 | 1.61 | 异常   | 轻度脂肪肝声像。   |
| 4.20  | 6.17 | 1.75 | 3.26 | 1.59 | 未见异常 |            |
| 5.18  | 7.08 | 3.33 | 4.30 | 1.35 | 异常   | 脂肪肝声像      |
| 5.19  | 6.28 | 5.84 | 2.13 | 1.69 | 异常   | 肝内似见稍低回音区  |
| 5.51  | 6.02 | 1.51 | 2.95 | 2.10 | 异常   | 肝实质回声稍粗    |
| 6.08  | 7.38 | 1.51 | 4.08 | 1.93 | 未见异常 |            |
| 4.96  | 4.38 | 0.75 | 2.10 | 1.83 | 异常   | 肝实质回声稍粗    |
| 5.14  | 5.91 | 1.86 | 3.36 | 1.37 | 异常   | 轻度脂肪肝      |
| 6.62  | 7.18 | 1.26 | 3.68 | 2.18 | 未见异常 |            |
| 4.91  | 5.88 | 0.91 | 3.62 | 1.54 | 未见异常 |            |
| 8.15  | 5.65 | 1.43 | 2.68 | 2.12 | 异常   | 脂肪肝声像      |
| 4.92  | 5.28 | 0.83 | 2.83 | 1.51 | 异常   | 肝囊肿        |
| 5.91  | 5.84 | 1.31 | 3.26 | 1.56 | 未见异常 |            |
| 5.06  | 5.65 | 3.25 | 2.81 | 1.36 | 异常   | 轻度脂肪肝声像    |
| 5.54  | 5.80 | 1.63 | 3.31 | 1.76 | 未见异常 |            |
| 5.66  | 5.17 | 3.05 | 2.56 | 1.56 | 异常   | 脂肪肝声像      |
| 5.44  | 6.85 | 2.27 | 3.76 | 1.75 | 异常   | 脂肪肝声像      |
| 4.84  | 6.02 | 2.25 | 3.24 | 1.57 |      |            |
| 5.09  | 5.24 | 1.73 | 2.79 | 1.63 | 未见异常 |            |
| 5.95  | 4.27 | 1.12 | 2.17 | 1.23 |      |            |
| 4.75  | 6.95 | 1.05 | 4.03 | 1.77 | 未见异常 |            |
| 4.61  | 6.27 | 2.07 | 3.49 | 1.52 | 异常   | 胆囊内稍高回声结节  |
| 4.38  | 5.25 | 1.51 | 2.93 | 1.51 | 异常   | 肝囊肿        |
| 6.76  | 7.77 | 3.15 | 4.61 | 1.48 | 未见异常 |            |
| 4.95  | 6.04 | 0.91 | 3.12 | 2.11 | 未见异常 |            |
| 6.21  | 4.61 | 2.76 | 2.03 | 1.65 | 未见异常 |            |
| 4.75  | 5.28 | 0.71 | 2.14 | 2.23 | 异常   | 肝内囊性回声(考虑  |
| 5.07  | 4.84 | 1.22 | 2.44 | 1.67 | 未见异常 |            |
| 5.22  | 6.20 | 1.43 | 3.01 | 1.95 | 未见异常 |            |
| 6.02  | 7.96 | 1.17 | 4.80 | 1.69 | 异常   | 脂肪肝, 胆囊内强回 |
| 5.80  | 4.73 | 0.79 | 2.61 | 1.57 | 异常   | 轻度脂肪肝声像; 胆 |
| 4.49  | 5.67 | 1.47 | 3.01 | 1.45 | 异常   | 轻度脂肪肝、肝囊肿  |
| 4.65  | 6.30 | 1.42 | 3.56 | 1.39 | 未见异常 |            |
| 4.82  | 7.04 | 9.33 | 1.41 | 1.06 |      |            |
| 6.72  | 5.25 | 1.92 | 2.39 | 1.97 | 异常   | 脂肪肝声像      |
| 5.96  | 5.81 | 1.73 | 3.48 | 1.56 | 异常   | 胆囊结石       |
| 5.07  | 5.78 | 1.10 | 3.52 | 1.51 | 异常   | 1、轻度脂肪肝声像  |

|       |      |      |      |      |      |             |
|-------|------|------|------|------|------|-------------|
| 5.09  | 5.87 | 1.21 | 2.99 | 1.72 | 未见异常 |             |
| 6.18  | 6.75 | 1.79 | 3.83 | 1.79 | 异常   | 胆囊多发息肉样病变   |
| 9.43  | 6.12 | 1.62 | 3.59 | 1.82 | 异常   | 1、脂肪肝声像 2、胆 |
| 5.72  | 3.16 | 1.51 | 1.48 | 1.18 |      |             |
| 6.17  | 4.75 | 0.42 | 2.37 | 1.66 | 异常   | 肝实质回声增粗；肝   |
| 5.98  | 3.01 | 1.45 | 1.26 | 1.29 |      |             |
| 4.58  | 3.64 | 0.83 | 1.50 | 1.39 |      |             |
| 5.56  | 5.98 | 1.84 | 3.55 | 1.49 | 异常   | 轻度脂肪肝，胆囊息   |
| 4.98  | 3.97 | 4.44 | 1.36 | 1.25 | 异常   | 胆囊结石        |
| 9.09  | 6.14 | 1.44 | 3.15 | 1.73 | 异常   | 脂肪肝声像       |
| 4.80  | 7.70 | 1.32 | 4.63 | 1.97 | 未见异常 |             |
| 4.24  | 6.74 | 1.79 | 3.74 | 1.65 |      |             |
| 4.39  | 5.96 | 2.42 | 2.84 | 1.73 | 异常   | 脂肪肝声像       |
| 6.44  | 3.82 | 3.16 | 1.72 | 1.34 | 异常   | 肝高回声结节，性质   |
| 6.91  | 4.45 | 2.26 | 2.10 | 1.39 | 异常   | 脂肪肝声像       |
| 5.75  | 5.01 | 3.02 | 2.15 | 1.58 | 异常   | 脂肪肝声像       |
| 7.15  | 4.38 | 2.16 | 2.15 | 1.44 | 异常   | 肝囊内强回声（考虑   |
| 4.88  | 6.16 | 0.78 | 2.71 | 2.15 | 未见异常 |             |
| 4.90  | 5.05 | 3.95 | 2.18 | 1.36 | 异常   | 脂肪肝声像       |
| 4.69  | 7.40 | 1.96 | 4.06 | 2.00 | 未见异常 |             |
| 5.67  | 5.50 | 3.57 | 2.79 | 1.24 | 异常   | 轻度脂肪肝声像     |
| 10.18 | 6.29 | 1.32 | 2.98 | 2.07 | 异常   | 脂肪肝声像       |
| 4.96  | 6.91 | 2.46 | 3.52 | 1.67 | 未见异常 |             |
| 9.79  | 5.11 | 2.08 | 2.72 | 1.49 | 异常   | 轻度脂肪肝声像     |
| 6.40  | 8.34 | 6.08 | 3.64 | 1.19 | 异常   | 肝左叶稍高回声结节   |
| 6.41  | 5.67 | 2.95 | 3.05 | 1.26 | 异常   | 脂肪肝声像       |
| 3.72  | 6.38 | 1.14 | 3.52 | 1.79 | 异常   | 肝内局部胆管稍扩张   |
| 8.75  | 6.10 | 1.20 | 3.53 | 1.38 | 异常   | 脂肪肝声像       |
| 4.60  | 4.61 | 2.95 | 2.20 | 1.28 | 未见异常 |             |
| 9.22  | 6.08 | 1.49 | 3.46 | 1.39 | 异常   | 胆囊内强回声（考虑   |
| 5.15  | 7.18 | 1.51 | 3.87 | 2.01 | 异常   | 1、肝实质内稍高回   |
| 5.78  | 6.97 | 2.72 | 3.61 | 1.61 | 异常   | 肝囊肿         |
| 4.74  | 4.80 | 2.82 | 2.33 | 1.17 | 未见异常 |             |
| 6.49  | 5.88 | 1.12 | 2.55 | 2.08 | 未见异常 |             |
| 4.56  | 6.60 | 2.20 | 3.48 | 1.56 | 异常   | 轻度脂肪肝声像     |
| 3.85  | 5.14 | 2.98 | 2.33 | 1.56 | 未见异常 |             |
| 5.72  | 4.77 | 4.52 | 1.76 | 1.53 | 异常   | 脂肪肝声像       |
| 4.96  | 7.58 | 2.35 | 4.05 | 1.85 | 未见异常 |             |
| 4.97  | 6.43 | 0.88 | 3.79 | 1.44 | 未见异常 |             |
| 4.69  | 7.14 | 2.40 | 4.16 | 1.32 | 未见异常 |             |
| 5.60  | 6.32 | 1.03 | 3.51 | 1.63 | 未见异常 |             |
| 8.65  | 5.25 | 0.88 | 2.71 | 1.48 | 未见异常 |             |
| 5.61  | 6.78 | 2.23 | 3.92 | 1.33 | 未见异常 |             |
| 4.70  | 5.81 | 1.30 | 2.88 | 1.91 | 异常   | 胆囊内稍强回声区：   |
| 4.87  | 4.63 | 1.20 | 1.70 | 1.84 | 未见异常 |             |
| 4.95  | 6.78 | 2.77 | 3.75 | 1.42 | 异常   | 肝囊肿，胆囊结石    |
| 5.76  | 6.60 | 2.70 | 3.48 | 1.60 | 异常   | 脂肪肝声像，胆囊内   |
| 4.92  | 7.23 | 3.60 | 3.99 | 1.51 | 异常   | 1、脂肪肝声像；    |
| 4.26  | 3.33 | 1.32 | 1.64 | 0.71 | 异常   | 胆囊切除术后      |
| 4.85  | 3.90 | 0.54 | 1.59 | 1.55 | 未见异常 |             |
| 5.50  | 7.78 | 1.59 | 4.67 | 1.56 | 异常   | 1、肝囊肿；2、胆囊  |

|       |      |      |      |      |      |              |
|-------|------|------|------|------|------|--------------|
| 4.53  | 6.20 | 3.40 | 2.93 | 1.55 | 异常   | 1肝多发囊肿。2胆囊   |
| 5.33  | 6.51 | 1.25 | 3.63 | 1.80 | 异常   | 1. 脂肪肝升声像。2. |
| 4.90  | 4.96 | 1.43 | 1.78 | 2.34 | 未见异常 |              |
| 4.94  | 6.27 | 1.50 | 4.16 | 1.01 | 未见异常 |              |
| 5.36  | 7.17 | 2.00 | 4.32 | 1.39 | 异常   | 脂肪肝声像；胆囊结    |
| 5.17  | 5.84 | 1.04 | 3.38 | 1.58 | 未见异常 |              |
| 5.21  | 5.95 | 1.69 | 3.22 | 1.49 | 未见异常 |              |
| 5.29  | 5.74 | 1.53 | 2.88 | 1.63 | 未见异常 |              |
| 5.10  | 5.92 | 1.23 | 2.59 | 1.96 | 异常   | 胆囊息肉样病变      |
| 5.24  | 6.50 | 1.56 | 4.16 | 1.39 | 未见异常 |              |
| 6.62  | 4.44 | 1.07 | 2.21 | 1.62 | 未见异常 |              |
| 5.14  | 4.11 | 1.13 | 2.03 | 1.49 | 未见异常 |              |
| 7.60  | 6.70 | 1.40 | 3.82 | 1.71 | 未见异常 |              |
| 5.11  | 4.36 | 1.74 | 2.09 | 1.25 | 未见异常 |              |
| 11.33 | 6.93 | 1.41 | 3.91 | 1.67 |      |              |
| 4.71  | 5.65 | 1.88 | 3.07 | 1.53 | 未见异常 |              |
| 6.89  | 6.62 | 2.35 | 3.64 | 1.42 | 异常   | 轻度脂肪肝声像      |
| 5.57  | 7.01 | 2.55 | 3.96 | 1.69 | 未见异常 |              |
| 7.39  | 4.75 | 6.61 | 1.35 | 1.31 | 异常   | 轻度脂肪肝声像      |
| 5.44  | 4.87 | 0.96 | 2.13 | 1.82 | 未见异常 |              |
| 4.75  | 5.94 | 1.70 | 3.17 | 1.62 | 未见异常 |              |
| 4.25  | 5.85 | 1.68 | 3.37 | 1.40 | 异常   | 轻度脂肪肝声像      |
| 15.37 | 4.65 | 3.77 | 2.12 | 1.15 | 异常   | 胆囊腔内稍高回声点    |
| 4.61  | 6.56 | 0.74 | 3.54 | 1.81 | 异常   | 肝内强回声斑：考虑    |
| 5.26  | 4.27 | 2.19 | 1.98 | 1.34 | 未见异常 |              |
| 6.12  | 5.88 | 0.92 | 2.80 | 1.86 | 异常   | 脾内囊性暗区，考虑    |
| 4.52  | 5.86 | 1.74 | 3.21 | 1.56 | 未见异常 |              |
| 5.21  | 4.80 | 1.45 | 2.62 | 1.28 | 未见异常 |              |
| 4.41  | 7.63 | 4.54 | 3.75 | 1.52 | 异常   | 脂肪肝声像        |
| 4.62  | 7.06 | 0.92 | 3.76 | 2.03 | 未见异常 |              |
| 5.54  | 6.21 | 1.79 | 3.67 | 1.35 | 异常   | 脂肪肝          |
| 4.36  | 5.91 | 1.00 | 2.92 | 2.24 | 未见异常 |              |
| 7.62  | 4.12 | 1.81 | 2.19 | 1.00 | 异常   | 轻度脂肪肝声像      |
| 4.77  | 3.45 | 0.89 | 1.53 | 1.35 | 未见异常 |              |
| 4.54  | 7.33 | 1.76 | 3.62 | 1.98 | 未见异常 |              |
| 5.02  | 5.27 | 1.71 | 3.04 | 1.54 | 异常   | 脾内强回声斑：考虑    |
| 7.33  | 7.30 | 1.76 | 4.30 | 1.93 | 异常   | 胆囊结石         |
| 5.44  | 6.09 | 2.00 | 3.38 | 1.68 | 未见异常 |              |
| 5.59  | 6.57 | 4.40 | 2.93 | 1.62 | 异常   | 脂肪肝声像        |
| 4.81  | 4.88 | 0.77 | 2.25 | 1.55 | 异常   | 脂肪肝声像；       |
| 5.27  | 6.06 | 2.90 | 3.19 | 1.52 | 未见异常 |              |
| 5.52  | 6.15 | 2.11 | 3.33 | 1.52 | 未见异常 |              |
| 5.67  | 4.13 | 1.33 | 1.61 | 1.69 | 未见异常 |              |
| 5.36  | 7.13 | 1.45 | 4.01 | 2.05 | 异常   | 肝囊肿          |
| 4.71  | 4.87 | 1.29 | 2.42 | 1.66 | 未见异常 |              |
| 7.11  | 4.60 | 3.07 | 2.29 | 1.13 | 异常   | 脂肪肝声像        |
| 6.81  | 4.48 | 1.22 | 1.90 | 1.61 | 未见异常 |              |
| 5.54  | 5.79 | 1.22 | 3.19 | 1.54 | 未见异常 |              |
| 5.32  | 6.28 | 1.30 | 3.64 | 1.37 | 未见异常 |              |
| 4.46  | 6.21 | 2.50 | 2.67 | 1.91 | 未见异常 |              |
| 5.31  | 4.50 | 1.46 | 2.03 | 1.43 | 异常   | 脂肪肝声像        |

|       |      |      |      |      |                  |
|-------|------|------|------|------|------------------|
| 4.60  | 6.96 | 1.02 | 3.90 | 1.85 | 未见异常             |
| 4.87  | 8.19 | 3.10 | 4.24 | 2.13 | 未见异常             |
| 5.25  | 6.80 | 3.19 | 3.25 | 1.60 | 未见异常             |
| 11.82 | 5.11 | 0.73 | 2.63 | 1.63 | 异常 轻度脂肪肝声像       |
| 4.86  | 5.26 | 1.10 | 2.80 | 1.57 | 未见异常             |
| 7.18  | 6.09 | 2.00 | 3.32 | 1.40 | 异常 轻度脂肪肝声像       |
| 14.47 | 6.58 | 1.04 | 3.63 | 2.20 | 未见异常             |
| 4.92  | 4.30 | 1.46 | 2.42 | 1.17 | 异常 胆囊内强回声（考虑     |
| 7.30  | 4.43 | 1.69 | 2.48 | 1.30 | 异常 轻度脂肪肝声像       |
| 4.69  | 4.85 | 0.92 | 2.70 | 1.48 | 未见异常             |
| 5.17  | 4.91 | 0.78 | 1.97 | 2.00 | 异常 肝左叶稍高回声结节     |
| 6.22  | 6.43 | 2.59 | 3.64 | 1.63 | 异常 肝内强回声斑：考虑     |
| 5.27  | 3.98 | 1.31 | 2.15 | 1.08 | 异常 轻度脂肪肝声像       |
| 3.79  | 4.98 | 0.71 | 2.37 | 1.67 | 未见异常             |
| 4.35  | 4.53 | 0.74 | 1.82 | 1.88 | 未见异常             |
| 4.36  | 4.75 | 1.19 | 2.37 | 1.45 | 异常 肝内稍高回声，钙化     |
| 5.92  | 8.95 | 0.94 | 5.50 | 1.87 | 异常 轻度脂肪肝声像；      |
| 4.61  | 6.77 | 3.15 | 3.68 | 1.48 | 未见异常             |
| 4.79  | 9.45 | 2.83 | 5.12 | 2.14 | 未见异常             |
| 21.42 | 4.28 | 3.42 | 1.96 | 0.96 | 异常 脂肪肝声像         |
| 5.75  | 4.06 | 1.52 | 1.85 | 1.38 | 异常 脂肪肝声像         |
| 6.40  | 4.65 | 2.86 | 2.37 | 1.20 | 异常 1. 脂肪肝声像2. 肝内 |
| 5.00  | 7.72 | 3.88 | 4.02 | 1.37 | 未见异常             |
| 5.43  | 9.45 | 8.56 | 1.91 | 1.70 | 异常 轻度脂肪肝声像；      |
| 7.39  | 5.71 | 1.55 | 3.19 | 1.70 |                  |
| 4.96  | 4.89 | 1.44 | 2.41 | 1.67 | 未见异常             |
| 4.46  | 3.66 | 0.71 | 1.45 | 1.52 | 异常 轻度脂肪肝声像       |
| 5.55  | 6.40 | 1.97 | 4.17 | 1.34 | 异常 肝实质内异常回声，     |
| 6.56  | 3.20 | 1.71 | 1.72 | 1.00 |                  |
| 5.02  | 4.64 | 0.60 | 1.91 | 1.95 | 未见异常             |
| 4.80  | 4.70 | 0.86 | 2.29 | 1.79 | 未见异常             |
| 5.21  | 6.11 | 1.52 | 3.35 | 1.97 | 异常 轻度脂肪肝声像；      |
| 4.71  | 4.08 | 1.42 | 2.15 | 1.18 | 异常 脂肪肝声像         |
| 9.69  | 5.65 | 1.93 | 3.23 | 1.43 | 异常 脂肪肝声像。胆囊内     |
| 6.31  | 5.77 | 0.91 | 3.02 | 1.64 | 异常 胆结石           |
| 5.38  | 4.92 | 2.04 | 2.19 | 1.45 | 异常 轻度脂肪肝声像       |
| 4.64  | 6.44 | 2.72 | 3.89 | 1.39 | 异常 胆囊内强性回声（考     |
| 8.55  | 5.55 | 0.92 | 3.57 | 1.35 | 异常 轻度脂肪肝声像       |
| 5.51  | 5.86 | 2.87 | 3.24 | 1.36 | 异常 轻度脂肪肝声像。      |
| 5.39  | 5.66 | 3.12 | 3.04 | 1.21 | 未见异常             |
| 4.16  | 5.25 | 0.66 | 2.68 | 1.38 | 未见异常             |
| 5.75  | 3.89 | 3.65 | 1.58 | 1.05 | 异常 脾稍大           |
| 5.36  | 4.92 | 3.42 | 2.41 | 1.32 | 异常 脂肪肝声像；肝囊肿     |
| 4.99  | 4.82 | 3.32 | 2.29 | 1.21 | 异常 1. 脂肪肝声像 2. 肝 |
| 5.51  | 6.38 | 1.27 | 3.66 | 1.67 | 异常 胆囊结石          |
| 4.58  | 5.65 | 1.71 | 3.18 | 1.39 | 未见异常             |
| 5.13  | 6.17 | 1.75 | 3.37 | 1.72 | 异常 轻度脂肪肝声像；胆     |
| 5.18  | 6.21 | 2.37 | 3.74 | 1.29 | 异常 腹部B超：1、脂肪肝    |
| 5.91  | 5.17 | 2.65 | 2.57 | 1.59 | 异常 脂肪肝声像         |
| 6.16  | 5.37 | 1.44 | 3.04 | 1.51 | 异常 轻度脂肪肝声像       |
| 5.32  | 7.30 | 2.36 | 4.32 | 1.80 | 未见异常             |

|       |       |      |      |      |      |            |
|-------|-------|------|------|------|------|------------|
| 6.29  | 6.08  | 1.84 | 3.56 | 1.51 | 异常   | 脂肪肝声像      |
| 10.54 | 5.52  | 2.55 | 2.80 | 1.53 | 异常   | 脂肪肝声像; 胆囊壁 |
| 5.81  | 5.09  | 2.95 | 2.43 | 1.40 | 异常   | 脂肪肝声像      |
| 5.63  | 6.80  | 0.81 | 3.98 | 1.68 | 未见异常 |            |
| 5.87  | 6.58  | 1.95 | 3.91 | 1.53 | 异常   | 肝内强回声斑: 考虑 |
| 5.49  | 3.36  | 0.66 | 1.68 | 1.16 | 异常   | 1轻度脂肪肝声像2胆 |
| 5.59  | 7.51  | 3.22 | 4.03 | 1.85 | 异常   | 轻度脂肪肝声像。   |
| 6.82  | 4.61  | 4.17 | 1.85 | 1.50 | 异常   | 1、脂肪肝声像 2胆 |
| 4.95  | 4.05  | 2.81 | 1.81 | 1.25 | 异常   | 轻度脂肪肝声像    |
| 5.94  | 5.61  | 1.38 | 2.77 | 1.66 | 未见异常 |            |
| 4.74  | 6.20  | 2.15 | 3.13 | 1.72 | 异常   | 肝囊肿        |
| 6.33  | 5.29  | 1.65 | 2.47 | 1.78 | 未见异常 |            |
| 5.90  | 5.92  | 0.85 | 3.51 | 1.36 | 异常   | 脂肪肝声像      |
| 7.34  | 3.87  | 1.03 | 2.01 | 1.02 | 异常   | 轻度脂肪肝声像、胆  |
| 5.06  | 3.70  | 0.72 | 1.80 | 1.13 | 未见异常 |            |
| 6.34  | 6.08  | 1.56 | 3.43 | 1.31 | 异常   | 轻度脂肪肝声像; 胆 |
| 5.54  | 5.87  | 0.91 | 3.27 | 1.68 | 未见异常 |            |
| 4.77  | 5.67  | 0.83 | 2.87 | 1.90 | 异常   | 胆囊腔内多发强回声  |
| 4.61  | 5.70  | 2.05 | 3.02 | 1.72 | 未见异常 |            |
| 5.31  | 4.91  | 1.50 | 2.82 | 1.37 | 异常   | 轻度脂肪肝声像    |
| 6.51  | 5.42  | 5.39 | 1.81 | 1.26 | 异常   | 脂肪肝; 肝内囊性回 |
| 4.94  | 5.98  | 1.31 | 3.00 | 1.96 | 异常   | 肝囊肿        |
| 7.21  | 7.92  | 6.89 | 2.46 | 1.53 | 异常   | 脂肪肝声像      |
| 5.02  | 5.02  | 1.69 | 2.44 | 1.51 | 未见异常 |            |
| 5.69  | 5.09  | 2.12 | 2.55 | 1.75 | 未见异常 |            |
| 4.70  | 5.84  | 1.12 | 3.32 | 1.44 | 异常   | 胆囊多发性结石    |
| 4.78  | 10.05 | 2.39 | 6.72 | 1.74 | 异常   | 脂肪肝声像。     |
| 6.89  | 5.18  | 1.35 | 2.77 | 1.50 | 异常   | 轻度脂肪肝, 肝囊肿 |
| 7.49  | 5.06  | 1.04 | 2.49 | 1.52 | 异常   | 胆囊切除术后, 胆总 |
| 5.04  | 5.96  | 4.16 | 2.54 | 1.51 | 未见异常 |            |
| 5.11  | 9.56  | 2.21 | 5.44 | 2.04 | 异常   | 轻度脂肪肝      |
| 6.00  | 9.01  | 1.81 | 5.79 | 1.48 | 未见异常 |            |
| 6.13  | 4.26  | 0.92 | 2.02 | 1.39 | 未见异常 |            |
| 4.84  | 4.72  | 1.28 | 2.16 | 1.67 | 未见异常 |            |
| 4.78  | 5.61  | 1.50 | 2.84 | 1.83 | 异常   | 肝囊肿        |
| 4.64  | 4.38  | 1.25 | 2.14 | 1.32 | 异常   | 1.轻度脂肪肝声像; |
| 4.89  | 5.47  | 1.58 | 2.07 | 2.20 | 异常   | 肝内强回声斑, 考虑 |
| 4.88  | 6.54  | 5.67 | 2.42 | 1.62 | 异常   | 轻度脂肪肝声像    |
| 4.61  | 4.62  | 1.33 | 2.77 | 1.11 |      |            |
| 4.46  | 4.09  | 0.86 | 2.00 | 1.30 | 异常   | 脂肪肝声像, 肝囊肿 |
| 7.89  | 5.89  | 3.45 | 2.58 | 1.65 | 异常   | 脂肪肝声像      |
| 12.43 | 4.36  | 1.52 | 2.03 | 1.52 | 异常   | 轻度脂肪肝声像    |
| 5.38  | 6.90  | 2.46 | 3.86 | 1.46 | 异常   | 肝囊肿        |
| 5.42  | 5.80  | 1.72 | 3.35 | 1.49 | 未见异常 |            |
| 5.64  | 4.20  | 1.97 | 1.75 | 1.60 | 异常   | 脂肪肝声像      |
| 4.86  | 5.55  | 1.71 | 2.94 | 1.84 | 未见异常 |            |
| 4.53  | 5.42  | 1.51 | 2.95 | 1.44 | 异常   | 肝左叶体积小、肝内  |
| 6.02  | 4.79  | 0.62 | 2.44 | 1.53 | 未见异常 |            |
| 4.70  | 6.94  | 2.40 | 3.59 | 1.95 | 未见异常 |            |
| 5.10  | 5.38  | 4.31 | 2.43 | 1.19 | 异常   | 脂肪肝声像, 胆囊结 |
| 4.39  | 7.63  | 1.98 | 4.18 | 1.59 | 异常   | 胆总管扩张、脾内强  |

|       |       |       |      |      |      |             |
|-------|-------|-------|------|------|------|-------------|
| 6.72  | 2.77  | 0.78  | 1.11 | 1.15 | 未见异常 |             |
| 15.03 | 4.74  | 1.32  | 2.26 | 1.63 | 异常   | 胆囊结石        |
| 4.57  | 5.35  | 1.23  | 2.69 | 1.63 | 异常   | 肝内囊性回声（考虑   |
| 4.59  | 6.09  | 1.09  | 3.15 | 1.81 | 未见异常 |             |
| 5.53  | 7.23  | 1.01  | 3.97 | 1.80 | 异常   | 胆囊结石        |
| 7.30  | 6.42  | 0.83  | 3.52 | 1.67 | 未见异常 |             |
| 5.60  | 6.51  | 0.98  | 3.23 | 1.84 | 未见异常 |             |
| 6.18  | 5.68  | 2.16  | 2.73 | 1.57 | 异常   | 轻度脂肪肝声像     |
| 5.52  | 6.36  | 1.42  | 3.72 | 1.48 | 异常   | 脂肪肝声像       |
| 6.68  | 6.75  | 1.67  | 3.82 | 1.68 | 异常   | 腹部B超：.胆囊内强  |
| 5.04  | 5.07  | 1.42  | 2.79 | 1.09 | 异常   | 1.轻度脂肪肝 2.胆 |
| 5.46  | 6.66  | 2.37  | 3.63 | 1.49 | 异常   | 胆囊结石        |
| 8.01  | 3.47  | 1.61  | 1.48 | 1.46 | 异常   | 脂肪肝声像       |
| 6.19  | 4.45  | 1.33  | 1.90 | 1.64 | 异常   | 脂肪肝声像。      |
| 4.33  | 5.03  | 1.74  | 2.74 | 1.48 | 异常   | 肝囊肿声像       |
| 4.79  | 6.76  | 0.94  | 4.21 | 1.71 | 异常   | 胆囊结石        |
| 5.02  | 5.56  | 0.82  | 2.93 | 1.90 | 异常   | 肝囊肿         |
| 5.81  | 5.53  | 1.01  | 2.76 | 1.69 | 异常   | 1.轻度脂肪肝2.肝小 |
| 5.65  | 6.28  | 3.22  | 3.04 | 1.46 | 异常   | 轻度脂肪肝声像     |
| 5.25  | 10.27 | 18.13 | 2.31 | 1.25 | 异常   | 1、脂肪肝声像；2、  |
| 15.31 | 6.83  | 2.60  | 4.07 | 1.74 | 异常   | 腹部B超：肝内强回   |
| 5.36  | 6.68  | 1.37  | 3.69 | 1.84 | 未见异常 |             |
| 16.62 | 5.23  | 1.83  | 2.53 | 1.44 | 异常   | 胆囊内强回声（考虑   |
| 4.69  | 3.92  | 4.94  | 1.27 | 1.07 | 未见异常 |             |
| 5.14  | 4.51  | 0.91  | 2.08 | 1.92 | 未见异常 |             |
| 4.44  | 5.20  | 2.55  | 2.63 | 1.56 | 异常   | 胆囊腔内稍强回声，   |
| 6.31  | 5.26  | 4.19  | 2.76 | 1.31 | 异常   | 轻度脂肪肝声像     |
| 5.46  | 6.90  | 2.05  | 4.04 | 1.57 | 未见异常 |             |
| 6.38  | 8.32  | 7.17  | 2.63 | 1.73 | 异常   | 1、脂肪肝声像；2、  |
| 5.57  | 6.75  | 2.24  | 3.57 | 1.81 | 未见异常 |             |
| 4.97  | 5.76  | 1.18  | 3.16 | 1.41 | 未见异常 |             |
| 6.40  | 4.82  | 0.82  | 2.67 | 1.62 | 未见异常 |             |
| 5.38  | 6.21  | 1.57  | 3.49 | 1.35 | 异常   | 轻度脂肪肝声像，肝   |
| 5.10  | 5.44  | 1.08  | 2.33 | 2.27 | 未见异常 |             |
| 5.46  | 5.52  | 1.37  | 3.01 | 1.56 | 异常   | 胆囊息肉样病变     |
| 5.12  | 6.30  | 1.81  | 3.39 | 1.49 | 未见异常 |             |
| 5.48  | 7.78  | 1.08  | 3.99 | 2.07 | 异常   | 肝囊肿         |
| 5.61  | 5.28  | 1.50  | 2.52 | 1.66 | 未见异常 |             |
| 5.13  | 5.65  | 1.27  | 2.94 | 1.70 | 异常   | 脂肪肝声像       |
| 4.58  | 4.78  | 1.82  | 2.78 | 1.03 | 未见异常 |             |
| 6.45  | 5.49  | 5.54  | 2.24 | 1.16 | 异常   | 脂肪肝         |
| 5.36  | 6.64  | 1.76  | 3.15 | 2.04 | 异常   | 胆囊内强回声      |
| 6.38  | 8.22  | 11.37 | 1.36 | 1.20 | 异常   | 肝胆脾胰B超：脂肪   |
| 4.38  | 5.50  | 2.76  | 2.80 | 1.34 | 异常   | 肝实质回声增粗     |
| 5.05  | 4.24  | 1.02  | 1.77 | 1.74 | 异常   | 轻度脂肪肝       |
| 5.59  | 4.60  | 2.10  | 2.58 | 1.06 | 异常   | 胆囊息肉病变      |
| 4.71  | 6.05  | 1.35  | 3.63 | 1.37 | 未见异常 |             |
| 6.63  | 6.87  | 1.32  | 3.71 | 1.98 | 未见异常 |             |
| 4.76  | 5.61  | 1.26  | 2.89 | 1.47 | 异常   | 胆囊窝强回声团（胆   |
| 9.74  | 7.59  | 2.00  | 4.18 | 1.79 | 异常   | 脂肪肝声像       |
| 5.36  | 5.98  | 2.62  | 3.36 | 1.63 | 异常   | 脂肪肝声像       |

|      |      |       |      |      |      |               |
|------|------|-------|------|------|------|---------------|
| 5.48 | 5.97 | 1.39  | 3.36 | 1.69 | 异常   | 脂肪肝声像         |
| 7.00 | 5.40 | 1.30  | 3.07 | 1.61 | 异常   | 肝小囊肿          |
| 4.37 | 5.30 | 1.90  | 2.56 | 1.56 | 异常   | 轻度脂肪肝声像       |
| 5.58 | 5.72 | 2.48  | 2.54 | 1.76 | 异常   | 胆囊结石          |
| 5.60 | 4.54 | 1.78  | 2.37 | 1.28 | 异常   | 胆囊息肉样病变       |
| 4.82 | 5.98 | 1.48  | 2.98 | 1.67 | 未见异常 |               |
| 6.11 | 4.63 | 1.32  | 1.81 | 1.75 | 未见异常 |               |
| 4.78 | 5.47 | 1.76  | 2.97 | 1.49 | 异常   | 1. 脂肪肝声像      |
| 5.91 | 6.79 | 3.62  | 3.42 | 1.70 | 异常   | 脂肪肝声像；胆囊内     |
| 5.33 | 5.81 | 2.37  | 3.18 | 1.15 | 未见异常 |               |
| 5.44 | 6.59 | 1.73  | 3.77 | 1.43 | 未见异常 |               |
| 4.81 | 4.54 | 1.10  | 1.52 | 2.17 | 未见异常 |               |
| 4.97 | 5.19 | 1.47  | 2.45 | 1.85 | 异常   | 胆囊结石          |
| 5.15 | 4.40 | 7.80  | 1.85 | 1.61 | 未见异常 |               |
| 4.86 | 6.48 | 1.64  | 4.06 | 1.51 | 异常   | 腹部B超：1、胆囊内    |
| 5.96 | 5.84 | 1.87  | 3.13 | 1.78 | 异常   | 1. 脂肪肝声像 2. 胆 |
| 5.59 | 5.87 | 1.86  | 3.27 | 1.48 | 异常   | 轻度脂肪肝声像。      |
| 5.00 | 7.15 | 1.05  | 4.10 | 1.94 | 未见异常 |               |
| 4.93 | 7.37 | 1.18  | 3.08 | 2.51 | 未见异常 |               |
| 6.69 | 6.98 | 1.97  | 4.20 | 1.43 | 未见异常 |               |
| 4.86 | 5.11 | 0.95  | 2.87 | 1.51 | 异常   | 肝内强回声斑（考虑     |
| 5.61 | 5.86 | 1.67  | 3.48 | 1.35 | 异常   | 轻度脂肪肝声像       |
| 8.96 | 5.43 | 2.41  | 2.90 | 1.30 | 异常   | 轻度脂肪肝声像       |
| 6.63 | 5.17 | 2.93  | 2.16 | 1.41 | 异常   | 1. 实质回声稍增粗 2  |
| 5.02 | 6.42 | 1.55  | 3.44 | 1.64 | 未见异常 |               |
| 6.14 | 3.75 | 1.09  | 1.97 | 1.27 | 异常   | 轻度脂肪肝声像       |
| 6.25 | 7.03 | 1.85  | 4.15 | 1.41 | 异常   | 胆内强回声团，考虑     |
| 7.66 | 6.89 | 2.46  | 3.91 | 1.56 | 异常   | 脂肪肝声像         |
| 4.58 | 5.75 | 1.18  | 3.33 | 1.48 | 未见异常 |               |
| 5.45 | 4.77 | 1.66  | 2.22 | 1.42 | 未见异常 |               |
| 4.53 | 6.34 | 3.91  | 2.77 | 1.54 | 异常   | 脂肪肝声像；胆囊结     |
| 5.22 | 5.04 | 3.56  | 2.25 | 1.52 | 异常   | 肝实质回声稍增粗      |
| 6.41 | 6.55 | 1.38  | 3.73 | 1.61 | 异常   | 胆囊息肉样变        |
| 6.75 | 6.15 | 2.46  | 3.17 | 1.60 | 未见异常 |               |
| 5.56 | 5.74 | 2.13  | 3.02 | 1.68 | 异常   | 脂肪肝声像         |
| 4.88 | 5.39 | 3.88  | 2.52 | 1.38 | 异常   | 轻度脂肪肝声像       |
| 9.20 | 6.40 | 10.77 | 0.88 | 0.98 |      |               |
| 4.51 | 5.77 | 1.67  | 3.11 | 1.51 | 未见异常 |               |
| 5.24 | 7.99 | 4.09  | 3.68 | 1.84 | 未见异常 |               |
| 5.76 | 4.84 | 3.43  | 2.46 | 1.14 |      |               |
| 5.19 | 6.22 | 1.17  | 3.39 | 1.91 | 未见异常 |               |
| 8.65 | 5.67 | 4.30  | 2.51 | 1.45 | 异常   | 1、脂肪肝声像2、胆    |
| 6.97 | 6.27 | 1.69  | 3.63 | 1.37 | 异常   | 肝内强回声斑，考虑     |
| 4.56 | 5.39 | 0.81  | 2.90 | 1.81 | 未见异常 |               |
| 6.13 | 7.33 | 1.55  | 4.08 | 1.63 | 未见异常 |               |
| 5.09 | 4.77 | 2.20  | 2.56 | 1.36 | 未见异常 |               |
| 4.68 | 4.57 | 2.99  | 2.02 | 1.43 | 未见异常 |               |
| 6.61 | 6.07 | 1.10  | 2.78 | 2.12 | 未见异常 |               |
| 4.78 | 4.92 | 0.94  | 2.64 | 1.51 | 未见异常 |               |
| 4.43 | 4.29 | 1.37  | 1.86 | 1.77 | 异常   | 胆囊区强回声团       |
| 4.96 | 5.81 | 1.31  | 3.14 | 1.51 | 异常   | 肝囊肿           |

|       |      |       |       |      |      |               |
|-------|------|-------|-------|------|------|---------------|
| 6.82  | 5.55 | 2.84  | 2.97  | 1.27 | 异常   | 1. 脂肪肝声像2. 胆囊 |
| 7.55  | 5.40 | 1.26  | 2.81  | 1.65 | 未见异常 |               |
| 5.39  | 7.30 | 1.60  | 4.33  | 1.88 | 异常   | 肝囊肿           |
| 4.77  | 4.13 | 2.12  | 1.97  | 1.19 | 异常   | 轻度脂肪肝声像；肝     |
| 8.51  | 6.10 | 0.84  | 3.19  | 1.63 | 未见异常 |               |
| 5.05  | 4.72 | 5.53  | 1.62  | 1.07 | 异常   | 胆囊强回声团，可能     |
| 5.62  | 6.07 | 0.67  | 3.17  | 1.93 | 未见异常 |               |
| 6.17  | 4.75 | 0.42  | 2.37  | 1.66 | 异常   | 1肝内强回声（考虑转    |
| 6.07  | 7.00 | 2.94  | 3.92  | 1.45 |      |               |
| 6.21  | 8.76 | 1.94  | 5.21  | 1.84 | 未见异常 |               |
| 8.50  | 5.84 | 2.29  | 3.21  | 1.46 | 异常   | 1轻度脂肪肝声像2肝    |
| 4.62  | 5.49 | 2.66  | 3.19  | 1.34 | 未见异常 |               |
| 5.80  | 7.36 | 2.31  | 4.26  | 1.48 | 未见异常 |               |
| 5.23  | 6.70 | 1.37  | 3.42  | 1.90 | 异常   | 1. 肝内强回声灶：考   |
| 4.70  | 5.59 | 1.05  | 2.92  | 1.66 | 未见异常 |               |
| 14.70 | 4.86 | 1.35  | 2.38  | 1.80 | 异常   | 轻度脂肪肝声像       |
| 6.27  | 7.21 | 2.84  | 3.61  | 1.83 | 异常   | 脂肪肝声像         |
| 5.02  | 7.30 | 2.35  | 4.17  | 1.53 | 未见异常 |               |
| 5.05  | 5.81 | 10.00 | 0.99  | 1.13 | 异常   | 轻度脂肪肝声像，肝     |
| 5.59  | 7.64 | 2.93  | 4.16  | 1.64 | 未见异常 |               |
| 4.76  | 6.85 | 2.46  | 4.01  | 1.41 | 异常   | 脂肪肝声像，胆囊结     |
| 5.52  | 4.95 | 0.91  | 1.99  | 2.07 | 未见异常 |               |
| 5.59  | 6.05 | 5.73  | 2.20  | 1.39 | 异常   | 轻度脂肪肝声像       |
| 4.49  | 5.52 | 1.28  | 3.15  | 1.58 | 未见异常 |               |
| 4.19  | 6.31 | 1.20  | 3.28  | 1.91 | 未见异常 |               |
| 4.89  | 5.77 | 1.93  | 3.01  | 1.80 | 未见异常 |               |
| 4.94  | 9.17 | 2.07  | 5.80  | 1.66 | 异常   | 轻度脂肪肝         |
| 6.99  | 4.69 | 2.28  | 2.39  | 1.29 | 异常   | 脂肪肝声像         |
| 9.29  | 5.58 | 1.40  | 3.34  | 1.27 | 异常   | 脂肪肝声像，肝囊肿     |
| 5.40  | 6.81 | 0.74  | 3.46  | 2.37 | 异常   | 肝多发囊性回声(考     |
| 4.60  | 4.83 | 0.97  | 2.39  | 1.73 | 异常   | 胆囊壁欠光滑，稍毛     |
| 5.74  | 5.01 | 0.62  | 2.36  | 1.84 | 异常   | 脂肪肝声像         |
| 4.61  | 6.03 | 1.11  | 3.90  | 1.94 | 未见异常 |               |
| 4.84  | 8.05 | 1.57  | 4.61  | 2.03 | 异常   | 胆囊结石          |
| 5.82  | 5.08 | 1.01  | 2.64  | 1.70 | 异常   | 脂肪肝声像。        |
| 5.09  | 6.90 | 1.20  | 4.00  | 1.80 | 异常   | 肝实质回声稍增粗      |
| 5.77  | 7.23 | 1.82  | 4.07  | 1.78 | 未见异常 |               |
| 6.74  | 6.26 | 4.31  | 3.01  | 1.58 | 异常   | 轻度脂肪肝         |
| 4.62  | 5.82 | 0.60  | 2.00  | 2.87 | 未见异常 |               |
| 7.30  | 7.67 | 8.90  | 1.53  | 1.57 | 异常   | 轻度脂肪肝         |
| 5.03  | 5.42 | 1.23  | 2.97  | 1.50 | 未见异常 |               |
| 5.32  | 6.35 | 3.50  | 2.89  | 1.69 | 未见异常 |               |
| 4.21  | 3.87 | 1.38  | 1.77  | 1.36 | 异常   | 胆囊内强回声,考虑     |
| 4.01  | 6.96 | 0.92  | 3.91  | 2.19 | 异常   | 胆囊结石          |
| 5.16  | 4.83 | 4.06  | 1.84  | 1.56 | 未见异常 |               |
| 8.31  | 4.17 | 1.61  | 2.05  | 1.28 | 异常   | 轻度脂肪肝         |
| 5.10  | 5.89 | 0.86  | 13.23 | 1.64 | 未见异常 |               |
| 6.43  | 6.21 | 2.42  | 3.01  | 1.84 | 未见异常 |               |
| 13.05 | 5.42 | 1.65  | 3.09  | 1.31 | 未见异常 |               |
| 5.29  | 5.91 | 2.24  | 3.12  | 1.41 | 未见异常 |               |
| 5.32  | 5.06 | 5.11  | 1.95  | 1.40 | 异常   | 轻度脂肪肝声像       |

|       |       |       |      |      |      |               |
|-------|-------|-------|------|------|------|---------------|
| 5.68  | 8.54  | 0.93  | 5.24 | 2.07 | 未见异常 |               |
| 8.37  | 5.61  | 0.88  | 2.88 | 1.65 | 未见异常 |               |
| 5.29  | 4.71  | 0.99  | 2.05 | 1.85 | 未见异常 |               |
| 4.83  | 10.64 | 1.25  | 5.99 | 2.70 | 异常   | 肝实质回声增粗       |
| 4.66  | 4.83  | 1.68  | 2.36 | 1.64 | 异常   | 肝内强回声斑，考虑     |
| 5.31  | 6.69  | 3.29  | 3.49 | 1.52 | 异常   | 腹部B超：1、脂肪肝    |
| 4.97  | 5.67  | 5.01  | 2.26 | 1.37 | 异常   | 轻度脂肪肝声像       |
| 5.17  | 5.71  | 3.09  | 2.90 | 1.21 | 异常   | 1 轻度脂肪肝；2 胆   |
| 6.36  | 6.33  | 6.51  | 2.05 | 1.32 | 异常   | 轻度脂肪肝         |
| 4.73  | 6.02  | 3.50  | 3.00 | 1.68 | 异常   | 轻度脂肪肝声像。胆     |
| 7.36  | 4.88  | 1.50  | 2.26 | 1.60 | 异常   | 脾内囊性回声，考虑     |
| 7.36  | 6.17  | 3.19  | 3.36 | 1.61 | 异常   | 脂肪肝声像         |
| 5.89  | 5.31  | 1.99  | 2.72 | 1.63 | 异常   | 脂肪肝声像,胆囊结     |
| 4.52  | 5.98  | 1.67  | 3.02 | 1.65 | 异常   | 胆囊结石          |
| 6.67  | 6.25  | 1.27  | 3.89 | 1.53 | 异常   | 腹部B超：1、脂肪肝    |
| 5.65  | 4.86  | 0.94  | 2.62 | 1.65 | 异常   | 脂肪肝声像         |
| 5.65  | 7.83  | 14.77 | 1.07 | 1.47 | 未见异常 |               |
| 6.83  | 5.06  | 2.70  | 2.31 | 1.55 | 异常   | 轻度脂肪肝声像       |
| 8.34  | 6.55  | 2.12  | 3.46 | 1.64 | 未见异常 |               |
| 11.07 | 4.66  | 5.42  | 1.50 | 1.21 | 异常   | 脂肪肝声像，胆囊多     |
| 4.34  | 5.45  | 1.26  | 2.34 | 1.80 | 异常   | 胆囊壁毛糙         |
| 5.44  | 5.41  | 3.60  | 2.45 | 1.68 | 未见异常 |               |
| 8.26  | 4.27  | 4.53  | 1.63 | 1.08 | 异常   | 轻度脂肪肝声像，肝     |
| 5.57  | 4.66  | 1.08  | 2.44 | 1.32 | 未见异常 |               |
| 5.05  | 5.99  | 1.89  | 3.03 | 1.64 | 未见异常 |               |
| 10.75 | 7.56  | 4.41  | 3.97 | 1.38 | 异常   | 脂肪肝声像         |
| 4.91  | 5.60  | 1.95  | 2.62 | 1.80 | 未见异常 |               |
| 4.67  | 6.51  | 1.01  | 3.52 | 2.07 | 异常   | 肝囊肿           |
| 4.45  | 4.06  | 2.93  | 1.71 | 1.46 | 异常   | 1. 脂肪肝声像2. 胆囊 |
| 5.93  | 3.91  | 5.02  | 1.36 | 1.12 | 异常   | 轻度脂肪肝声像       |
| 6.25  | 6.60  | 2.08  | 3.67 | 1.40 | 异常   | 胆囊息肉样病变       |
| 4.50  | 4.50  | 1.52  | 1.94 | 1.70 | 未见异常 |               |
| 4.99  | 5.42  | 0.89  | 3.03 | 1.61 | 异常   | 腹部B超：1、轻度脂    |
| 5.63  | 7.67  | 1.29  | 4.41 | 1.68 | 未见异常 |               |
| 4.82  | 5.87  | 1.41  | 3.17 | 1.45 | 未见异常 |               |
| 4.84  | 7.09  | 0.76  | 3.85 | 2.20 | 未见异常 |               |
| 4.88  | 3.83  | 1.75  | 1.72 | 1.34 | 未见异常 |               |
| 4.84  | 5.00  | 1.41  | 2.54 | 1.60 | 未见异常 |               |
| 4.33  | 6.20  | 0.77  | 2.60 | 2.33 | 未见异常 |               |
| 5.45  | 7.48  | 2.34  | 2.83 | 2.22 | 未见异常 |               |
| 4.65  | 5.94  | 1.01  | 2.88 | 2.01 | 异常   | 1、肝囊肿，2、胆囊    |
| 5.67  | 5.54  | 0.62  | 2.31 | 2.22 | 未见异常 |               |
| 5.39  | 4.67  | 0.59  | 2.27 | 1.41 |      |               |
| 4.75  | 3.97  | 1.28  | 1.38 | 1.72 | 未见异常 |               |
| 7.22  | 5.95  | 8.38  | 1.28 | 1.01 | 异常   | 脂肪肝声像；胆囊结     |
| 6.06  | 5.26  | 3.66  | 2.26 | 1.41 | 异常   | 轻度脂肪肝声像       |
| 4.44  | 4.38  | 1.22  | 2.34 | 1.15 | 未见异常 |               |
| 4.84  | 7.74  | 1.54  | 5.18 | 1.50 | 异常   | 胆囊内强回声（考虑     |
| 5.66  | 5.60  | 1.90  | 3.69 | 1.18 | 异常   | 肝左叶低回声，性质     |
| 6.45  | 5.97  | 1.41  | 3.61 | 1.44 | 异常   | 脂肪肝           |
| 5.17  | 4.55  | 0.95  | 1.91 | 1.77 | 异常   | 胆囊结石。         |

|       |      |      |      |      |      |             |
|-------|------|------|------|------|------|-------------|
| 4.73  | 6.33 | 1.90 | 3.80 | 1.20 | 异常   | 脂肪肝声像       |
| 6.30  | 4.87 | 2.25 | 1.81 | 1.91 | 未见异常 |             |
| 6.63  | 7.23 | 2.66 | 4.12 | 1.44 | 异常   | 轻度脂肪肝声像     |
| 5.82  | 5.96 | 2.52 | 3.10 | 1.50 | 异常   | 轻度脂肪肝       |
| 4.43  | 8.15 | 3.13 | 4.44 | 1.92 | 未见异常 |             |
| 4.68  | 5.71 | 1.99 | 2.74 | 1.75 | 异常   | 胆囊壁稍强回声区    |
| 5.32  | 6.49 | 1.70 | 3.75 | 1.85 | 未见异常 |             |
| 5.42  | 3.71 | 1.38 | 1.21 | 1.74 | 未见异常 |             |
| 4.50  | 6.01 | 1.53 | 3.08 | 1.89 | 未见异常 |             |
| 7.88  | 3.36 | 1.34 | 1.49 | 1.24 | 异常   | 脂肪肝声像       |
| 5.07  | 6.21 | 1.26 | 2.92 | 2.17 | 异常   | 轻度脂肪肝声像；肝   |
| 6.33  | 5.57 | 1.29 | 3.16 | 1.55 |      |             |
| 9.96  | 4.13 | 2.20 | 2.21 | 1.21 |      |             |
| 5.19  | 4.77 | 2.07 | 2.41 | 1.42 | 未见异常 |             |
| 14.82 | 7.54 | 2.08 | 4.28 | 1.87 | 异常   | 轻度脂肪肝声像     |
| 5.27  | 7.12 | 3.60 | 3.94 | 1.40 | 未见异常 |             |
| 5.19  | 6.20 | 0.80 | 3.93 | 1.42 | 异常   | 未排除胆囊结石     |
| 4.68  | 5.61 | 0.89 | 2.33 | 2.19 | 未见异常 |             |
| 4.38  | 5.19 | 1.98 | 2.18 | 1.78 | 未见异常 |             |
| 5.02  | 6.37 | 3.59 | 3.10 | 1.71 | 未见异常 |             |
| 4.99  | 5.97 | 1.52 | 3.10 | 1.90 | 异常   | 肝小囊肿        |
| 5.06  | 4.77 | 0.70 | 2.63 | 1.44 | 未见异常 |             |
| 7.37  | 5.04 | 2.20 | 2.83 | 1.13 | 异常   | 脂肪肝声像       |
| 9.25  | 4.71 | 1.82 | 2.51 | 1.38 | 异常   | 腹部B超异常：1.所  |
| 15.40 | 5.29 | 1.78 | 2.84 | 1.47 | 未见异常 |             |
| 5.26  | 4.12 | 3.39 | 1.76 | 1.27 | 异常   | 轻度脂肪肝       |
| 4.88  | 7.25 | 1.60 | 3.73 | 2.04 | 未见异常 |             |
| 5.41  | 4.98 | 1.41 | 2.63 | 1.54 | 未见异常 |             |
| 5.10  | 6.05 | 3.30 | 3.13 | 1.31 | 异常   | 肝内囊性回声（考虑   |
| 6.52  | 4.35 | 1.29 | 2.66 | 1.08 |      |             |
| 4.33  | 4.44 | 1.20 | 2.10 | 1.42 | 异常   | 肝右叶稍高回声结节   |
| 4.16  | 4.85 | 1.51 | 2.47 | 1.29 | 未见异常 |             |
| 5.23  | 4.91 | 1.60 | 2.74 | 1.24 | 未见异常 |             |
| 5.12  | 6.43 | 0.98 | 3.12 | 2.15 | 未见异常 |             |
| 4.86  | 7.96 | 0.87 | 5.09 | 1.48 | 异常   | 胆囊腔内强回声团（   |
| 5.40  | 4.09 | 0.72 | 1.98 | 1.32 | 未见异常 |             |
| 5.25  | 5.49 | 2.14 | 3.30 | 1.33 | 异常   | 肝囊肿         |
| 5.41  | 6.86 | 1.76 | 3.81 | 1.72 | 异常   | 轻度脂肪肝声像     |
| 4.87  | 4.88 | 2.80 | 2.39 | 1.27 | 异常   | 脂肪肝声像       |
| 5.05  | 7.55 | 2.94 | 3.93 | 2.26 | 未见异常 |             |
| 6.35  | 4.66 | 3.47 | 2.22 | 1.24 | 异常   | 1.轻度脂肪肝声像2. |
| 5.44  | 6.87 | 0.70 | 3.87 | 1.87 | 未见异常 |             |
| 4.97  | 3.58 | 1.58 | 1.38 | 1.45 | 未见异常 |             |
| 6.42  | 6.16 | 1.05 | 3.94 | 1.16 | 异常   | 轻度脂肪肝，肝内强   |
| 4.93  | 5.88 | 1.19 | 3.07 | 1.92 | 未见异常 |             |
| 4.86  | 5.44 | 2.59 | 2.94 | 1.32 | 未见异常 |             |
| 5.27  | 5.26 | 1.57 | 2.95 | 1.20 | 异常   | 腹部B超：轻度脂肪肝  |
| 5.81  | 7.17 | 1.16 | 2.97 | 2.52 | 异常   | 胆囊结石        |
| 6.20  | 5.47 | 1.31 | 2.60 | 1.89 | 异常   | 胆囊壁稍强回声（未   |
| 4.62  | 6.15 | 0.90 | 2.84 | 2.11 | 异常   | 胆囊结石        |
| 7.98  | 6.38 | 1.68 | 3.87 | 1.54 | 异常   | 胆囊切除术后；轻度   |

|      |       |       |      |      |      |             |
|------|-------|-------|------|------|------|-------------|
| 5.96 | 5.64  | 2.63  | 2.92 | 1.50 | 异常   | 脂肪肝声像；胆囊内   |
| 3.98 | 6.40  | 1.05  | 3.10 | 2.00 | 异常   | 胆囊结石        |
| 4.70 | 7.07  | 2.29  | 3.82 | 1.85 | 异常   | 轻度脂肪肝声像，肝   |
| 6.46 | 5.52  | 2.08  | 3.02 | 1.40 | 异常   | 脂肪肝声像       |
| 7.68 | 7.19  | 1.50  | 3.95 | 2.01 | 异常   | 胆囊结石        |
| 6.12 | 6.63  | 1.96  | 3.66 | 1.65 | 异常   | 脂肪肝声像       |
| 5.01 | 6.34  | 1.27  | 3.03 | 1.97 | 异常   | 1、胆囊息肉样病变   |
| 6.01 | 5.64  | 2.36  | 2.96 | 1.44 | 异常   | 1、胆囊结石      |
| 5.34 | 7.62  | 2.46  | 4.57 | 1.37 | 异常   | 脂肪肝声像、胆囊内   |
| 4.60 | 4.98  | 1.50  | 1.98 | 1.98 | 未见异常 |             |
| 5.31 | 5.31  | 1.93  | 2.87 | 1.34 | 未见异常 |             |
| 5.98 | 6.91  | 2.10  | 3.72 | 1.62 | 未见异常 |             |
| 5.23 | 7.65  | 1.72  | 3.90 | 2.04 | 未见异常 |             |
| 4.55 | 6.39  | 2.77  | 3.05 | 2.04 | 未见异常 |             |
| 4.92 | 3.64  | 0.89  | 1.61 | 1.43 | 未见异常 |             |
| 5.64 | 6.92  | 1.92  | 4.02 | 1.77 | 异常   | 轻度脂肪肝声像     |
| 5.48 | 6.14  | 2.94  | 3.46 | 1.26 | 异常   | 胆囊结石        |
| 5.84 | 7.89  | 1.25  | 4.15 | 2.06 | 异常   | 1.肝囊肿2.肝内强回 |
| 5.20 | 8.17  | 3.20  | 4.76 | 1.55 | 异常   | 脂肪肝声像       |
| 7.20 | 10.46 | 13.72 | 1.94 | 1.41 | 异常   | 腹部B超：脂肪肝声像  |
| 9.11 | 4.95  | 3.27  | 2.62 | 1.35 | 异常   | 腹部B超：1、脂肪肝  |
| 8.04 | 4.85  | 2.35  | 2.44 | 1.34 |      |             |
| 4.85 | 6.44  | 1.23  | 3.63 | 1.72 | 未见异常 |             |
| 4.35 | 5.15  | 0.98  | 2.61 | 1.61 | 异常   | 肝囊肿         |
| 5.21 | 6.18  | 1.50  | 3.51 | 1.62 | 异常   | 所示范围内轻度脂肪   |
| 5.56 | 7.84  | 0.98  | 4.11 | 2.20 | 未见异常 |             |
| 5.15 | 5.93  | 3.40  | 3.07 | 1.49 |      |             |
| 5.62 | 4.79  | 1.45  | 2.71 | 1.15 | 未见异常 |             |
| 7.77 | 5.71  | 3.05  | 2.77 | 1.57 | 异常   | 1、轻度脂肪肝声像；  |
| 5.85 | 5.18  | 1.29  | 2.87 | 1.28 | 未见异常 |             |
| 5.44 | 4.76  | 0.68  | 2.35 | 1.73 | 未见异常 |             |
| 4.70 | 4.73  | 2.59  | 2.58 | 1.09 | 未见异常 |             |
| 7.15 | 3.46  | 1.32  | 1.36 | 1.33 | 异常   | 轻度脂肪肝声像，胆   |
| 4.53 | 6.34  | 1.69  | 3.14 | 1.94 | 未见异常 |             |
| 4.66 | 5.94  | 1.36  | 3.04 | 1.83 | 未见异常 |             |
| 3.94 | 7.11  | 2.04  | 3.36 | 1.79 |      |             |
| 4.94 | 5.00  | 0.83  | 2.28 | 1.91 | 未见异常 |             |
| 5.90 | 3.75  | 1.06  | 1.04 | 1.92 | 未见异常 |             |
| 6.06 | 4.65  | 6.64  | 1.11 | 1.21 | 异常   | 腹部B超：轻度脂肪肝  |
| 5.22 | 5.93  | 1.65  | 3.17 | 1.72 | 未见异常 |             |
| 4.90 | 5.58  | 0.75  | 3.32 | 1.58 | 未见异常 |             |
| 5.61 | 7.21  | 0.90  | 4.37 | 1.73 | 未见异常 |             |
| 5.21 | 3.89  | 3.56  | 1.57 | 1.21 | 异常   | 脂肪肝声像       |
| 5.39 | 6.23  | 2.37  | 3.49 | 1.50 | 异常   | 轻度脂肪肝       |
| 4.52 | 6.31  | 3.28  | 3.10 | 1.56 | 异常   | 轻度脂肪肝       |
| 6.57 | 5.26  | 3.77  | 2.44 | 1.39 | 异常   | 1.轻度脂肪肝声像2. |
| 6.02 | 5.18  | 1.56  | 2.97 | 1.38 | 未见异常 |             |
| 5.17 | 7.98  | 3.08  | 4.28 | 1.67 | 未见异常 |             |
| 4.96 | 4.60  | 3.23  | 2.12 | 1.53 | 异常   | 肝内囊性回声（考虑   |
| 5.22 | 6.57  | 1.30  | 3.68 | 1.52 | 未见异常 |             |
| 5.34 | 4.78  | 2.16  | 2.47 | 1.52 | 异常   | 脂肪肝声像       |

|      |      |      |      |      |      |              |
|------|------|------|------|------|------|--------------|
| 4.31 | 5.83 | 3.26 | 2.95 | 1.58 | 异常   | 轻度脂肪肝声像      |
| 6.82 | 2.95 | 1.49 | 1.00 | 1.42 | 未见异常 |              |
| 4.89 | 5.47 | 1.13 | 2.41 | 1.86 | 未见异常 |              |
| 5.56 | 5.34 | 1.51 | 2.94 | 1.65 | 异常   | 轻度脂肪肝声像。     |
| 5.11 | 3.59 | 1.63 | 1.75 | 1.15 | 未见异常 |              |
| 6.79 | 4.20 | 1.52 | 2.15 | 1.09 | 异常   | 胆囊结石并胆囊增大    |
| 6.37 | 6.15 | 0.93 | 4.03 | 1.30 | 异常   | 1、脂肪肝声像，2、   |
| 8.15 | 6.79 | 4.98 | 3.06 | 1.51 | 异常   | 腹部B超：脂肪肝声像   |
| 4.57 | 5.67 | 0.84 | 3.27 | 1.81 | 异常   | 胆囊结石         |
| 5.52 | 5.32 | 1.10 | 2.89 | 1.75 | 异常   | 胆囊结石         |
| 5.49 | 5.54 | 1.39 | 2.11 | 2.49 | 未见异常 |              |
| 3.64 | 4.48 | 1.22 | 1.87 | 1.66 | 未见异常 |              |
| 4.34 | 7.07 | 4.06 | 3.17 | 1.83 | 未见异常 |              |
| 5.15 | 6.24 | 2.57 | 3.14 | 1.52 | 未见异常 |              |
| 4.66 | 6.47 | 2.29 | 3.37 | 1.78 | 异常   | 轻度脂肪肝声像      |
| 4.79 | 6.23 | 3.34 | 3.53 | 1.36 | 异常   | 轻度脂肪肝声像。     |
| 5.11 | 4.89 | 1.71 | 2.42 | 1.49 | 未见异常 |              |
| 7.26 | 5.48 | 1.87 | 2.95 | 1.41 | 未见异常 |              |
| 5.73 | 5.38 | 1.46 | 2.93 | 1.38 | 异常   | 肝内强回声斑（考虑    |
| 5.09 | 5.49 | 2.35 | 2.50 | 1.56 | 未见异常 |              |
| 4.80 | 6.56 | 3.30 | 3.09 | 1.60 | 异常   | 脂肪肝          |
| 4.84 | 6.36 | 1.16 | 3.71 | 1.59 | 未见异常 |              |
| 5.09 | 5.96 | 1.01 | 3.23 | 1.61 | 异常   | 胆囊息肉样病变      |
| 5.72 | 5.67 | 1.83 | 2.58 | 1.75 | 未见异常 |              |
| 4.84 | 5.15 | 0.90 | 2.22 | 1.85 | 未见异常 |              |
| 4.96 | 4.93 | 1.23 | 2.77 | 1.43 |      |              |
| 6.98 | 7.39 | 1.18 | 3.20 | 2.36 | 未见异常 |              |
| 5.17 | 3.82 | 0.74 | 1.16 | 2.11 | 未见异常 |              |
| 4.23 | 5.58 | 2.84 | 2.86 | 1.35 | 未见异常 |              |
| 4.70 | 7.16 | 0.92 | 3.61 | 2.17 | 异常   | 未除胆囊息肉病变     |
| 6.27 | 6.34 | 1.39 | 3.22 | 2.00 | 异常   | 肝囊肿          |
| 4.30 | 5.33 | 1.19 | 2.87 | 1.46 | 异常   | 胆囊内息肉样病变     |
| 5.15 | 4.04 | 0.94 | 1.76 | 1.69 | 未见异常 |              |
| 4.78 | 4.52 | 1.41 | 2.38 | 1.38 | 异常   | 胆囊结石         |
| 4.49 | 7.94 | 2.09 | 4.29 | 1.66 | 未见异常 |              |
| 4.81 | 6.66 | 1.05 | 3.37 | 2.01 | 未见异常 |              |
| 5.60 | 5.50 | 1.87 | 2.87 | 1.49 | 未见异常 |              |
| 6.16 | 8.89 | 1.58 | 3.54 | 2.82 | 未见异常 |              |
| 4.76 | 7.34 | 2.41 | 4.18 | 1.69 | 未见异常 |              |
| 5.21 | 5.58 | 1.24 | 2.99 | 1.44 | 异常   | 胆囊内稍强回声（胆    |
| 5.98 | 5.69 | 1.06 | 2.88 | 2.13 | 未见异常 |              |
| 6.01 | 4.88 | 1.07 | 2.81 | 1.42 | 异常   | 轻度脂肪肝声像      |
| 5.79 | 4.97 | 1.01 | 2.45 | 1.86 | 未见异常 |              |
| 5.51 | 7.22 | 1.89 | 4.02 | 1.90 | 未见异常 |              |
| 7.39 | 5.27 | 1.56 | 2.99 | 1.45 | 未见异常 |              |
| 8.93 | 5.30 | 1.79 | 2.88 | 1.33 | 异常   | 脂肪肝声像        |
| 4.30 | 6.73 | 1.62 | 3.89 | 1.66 | 异常   | 胆囊结石         |
| 7.03 | 5.11 | 1.91 | 2.37 | 1.63 | 异常   | 1.脂肪肝声像 2.肝囊 |
| 4.70 | 6.07 | 1.73 | 3.37 | 1.67 | 异常   | 肝内囊性回声（考虑    |
| 4.33 | 4.53 | 2.64 | 1.91 | 1.35 | 异常   | 1.胆囊结石 2.胆总管 |
| 5.35 | 5.54 | 2.00 | 2.58 | 1.72 | 异常   | 肝胆脾胰B超：肝左叶   |

|       |      |      |      |      |                |
|-------|------|------|------|------|----------------|
| 5.46  | 5.14 | 1.24 | 2.51 | 1.58 | 未见异常           |
| 4.40  | 5.24 | 1.86 | 2.89 | 1.49 | 异常 肝囊肿         |
| 4.52  | 5.70 | 1.26 | 2.65 | 1.66 | 未见异常           |
| 5.69  | 4.72 | 0.74 | 2.03 | 1.92 | 异常 胆囊息肉样病变     |
| 4.72  | 6.32 | 3.58 | 3.09 | 1.49 | 未见异常           |
| 4.73  | 3.06 | 0.84 | 1.18 | 1.40 | 未见异常           |
| 4.45  | 5.86 | 1.22 | 3.23 | 1.36 | 异常 胆囊结石        |
| 4.81  | 4.19 | 1.26 | 1.98 | 1.36 | 未见异常           |
| 5.28  | 5.25 | 1.30 | 2.82 | 1.45 | 异常 肝囊肿         |
| 4.71  | 6.15 | 2.38 | 3.39 | 1.37 | 异常 脂肪肝         |
| 5.03  | 5.27 | 1.24 | 2.54 | 1.67 | 未见异常           |
| 6.16  | 6.18 | 2.38 | 3.22 | 1.55 | 异常 脂肪肝声像       |
| 4.68  | 5.36 | 2.01 | 2.98 | 1.39 | 未见异常           |
| 5.81  | 6.73 | 0.87 | 3.95 | 1.77 | 异常 轻度脂肪肝声像     |
| 4.82  | 5.44 | 2.29 | 2.90 | 1.34 | 异常 脂肪肝声像       |
| 4.42  | 4.99 | 1.73 | 2.74 | 1.32 | 异常 脂肪肝声像       |
| 5.27  | 3.87 | 2.16 | 1.68 | 1.19 | 异常 脂肪肝声像       |
| 4.71  | 6.83 | 1.31 | 3.66 | 1.57 | 异常 脂肪肝声像       |
| 8.39  | 3.94 | 1.11 | 1.78 | 1.45 | 异常 肝左叶强回声结节，   |
| 6.07  | 7.43 | 2.25 | 4.62 | 1.52 | 异常 1、脂肪肝声像；2、  |
| 5.17  | 4.81 | 2.49 | 2.60 | 1.39 | 异常 肝囊肿         |
| 4.85  | 4.85 | 0.98 | 2.35 | 1.71 | 异常 胆囊息肉样病变     |
| 5.65  | 5.40 | 1.58 | 2.86 | 1.68 | 未见异常           |
| 4.35  | 5.46 | 2.14 | 2.36 | 2.10 | 异常 脂肪肝         |
| 5.26  | 6.77 | 1.27 | 3.19 | 2.20 | 未见异常           |
| 5.26  | 6.73 | 3.79 | 3.29 | 1.58 | 异常 轻度脂肪肝声像     |
| 5.91  | 5.34 | 1.45 | 2.85 | 1.42 | 未见异常           |
| 6.27  | 5.37 | 8.58 | 0.96 | 1.10 | 异常 脂肪肝声像       |
| 4.06  | 5.34 | 1.13 | 2.56 | 1.72 | 未见异常           |
| 5.01  | 5.92 | 1.01 | 3.35 | 1.66 | 异常 胆囊结石        |
| 5.24  | 5.41 | 1.75 | 2.98 | 1.40 | 异常 轻度脂肪肝声像     |
| 4.38  | 4.59 | 2.38 | 2.32 | 1.10 | 异常 肝囊肿         |
| 25.45 | 4.43 | 0.94 | 1.95 | 1.51 | 异常 脂肪肝声像、胆囊内   |
| 4.98  | 5.84 | 0.94 | 3.28 | 1.52 | 未见异常           |
| 4.88  | 6.20 | 2.75 | 3.37 | 1.40 | 异常 餐后胆囊，胆囊稍强   |
| 16.02 | 6.41 | 3.79 | 3.48 | 1.41 | 未见异常           |
| 5.07  | 7.69 | 2.00 | 4.41 | 1.93 | 未见异常           |
| 6.01  | 4.26 | 1.01 | 1.84 | 1.61 | 异常 胆囊多发结石      |
| 5.34  | 8.37 | 3.00 | 4.37 | 1.77 | 异常 1.脂肪肝声像 2.肝 |
| 5.74  | 5.49 | 5.53 | 1.62 | 1.64 | 异常 肿小囊肿，胆囊腔内   |
| 5.31  | 6.14 | 2.23 | 3.09 | 1.60 | 异常 脂肪肝声像       |
| 3.80  | 6.34 | 1.16 | 3.31 | 1.61 | 未见异常           |
| 6.04  | 4.67 | 0.73 | 2.22 | 1.65 | 异常 肝内强回声斑 胆管   |
| 8.07  | 5.17 | 2.79 | 2.66 | 1.41 | 异常 脂肪肝声像       |
| 4.56  | 7.31 | 1.85 | 4.45 | 1.62 | 异常 轻度脂肪肝声像     |
| 4.88  | 7.40 | 1.13 | 3.95 | 2.16 | 未见异常           |
| 4.66  | 6.02 | 2.25 | 3.55 | 1.38 | 异常 1、脂肪肝声像；    |
| 4.67  | 5.17 | 4.59 | 1.96 | 1.62 | 未见异常           |
| 6.34  | 6.81 | 2.72 | 4.17 | 1.35 | 异常 肝内强性回声斑（考   |
| 4.94  | 6.00 | 1.28 | 3.58 | 1.57 | 异常 肝内低回声结节：性   |
| 4.84  | 5.80 | 1.03 | 3.01 | 1.70 | 未见异常           |

|       |      |      |      |      |      |                |
|-------|------|------|------|------|------|----------------|
| 4.65  | 5.56 | 1.46 | 2.95 | 1.68 | 异常   | 脂肪肝声像, 肝囊肿     |
| 5.31  | 7.41 | 1.57 | 4.26 | 1.68 | 未见异常 |                |
| 5.05  | 6.89 | 1.19 | 3.57 | 2.06 | 异常   | 1. 轻度脂肪肝声像2.   |
| 4.94  | 7.32 | 2.04 | 4.14 | 1.76 | 异常   | 轻度脂肪肝声像。       |
| 5.20  | 6.76 | 1.19 | 3.99 | 1.56 | 未见异常 |                |
| 9.12  | 5.63 | 4.03 | 2.78 | 1.43 | 异常   | 1、脂肪肝声像; 2、    |
| 4.80  | 1.50 | 2.02 | 3.27 | 6.03 | 未见异常 |                |
| 5.12  | 4.99 | 1.66 | 2.16 | 1.89 | 异常   | 脂肪肝声像          |
| 5.39  | 5.67 | 1.31 | 3.41 | 1.45 | 未见异常 |                |
| 5.56  | 3.63 | 1.16 | 2.11 | 0.98 | 异常   | 1. 肝内囊性回声 2. 肝 |
| 5.59  | 4.68 | 1.57 | 2.65 | 1.28 | 未见异常 |                |
| 5.51  | 6.15 | 1.09 | 3.27 | 1.81 | 未见异常 |                |
| 6.02  | 4.64 | 2.40 | 1.91 | 1.77 | 异常   | 肝实质回声增粗; 肝     |
| 5.09  | 5.58 | 2.94 | 3.03 | 1.30 | 异常   | 1脂肪肝声像2胆囊结     |
| 5.90  | 5.74 | 3.70 | 3.01 | 1.30 | 异常   | 脂肪肝声像。肝囊肿      |
| 4.90  | 4.84 | 0.46 | 2.24 | 1.74 | 未见异常 |                |
| 10.53 | 4.94 | 1.21 | 2.68 | 1.51 |      |                |
| 4.80  | 5.45 | 4.11 | 2.40 | 1.44 | 异常   | 1轻度脂肪肝声像2肝     |
| 5.11  | 6.33 | 1.68 | 3.66 | 1.35 | 异常   | 轻度脂肪肝声像。       |
| 5.44  | 5.07 | 2.25 | 2.74 | 1.12 | 未见异常 |                |
| 4.90  | 4.77 | 0.68 | 1.90 | 1.72 | 未见异常 |                |
| 5.32  | 5.64 | 2.00 | 2.55 | 1.92 | 异常   | 胆囊息肉病变         |
| 6.44  | 6.39 | 2.16 | 3.51 | 1.48 | 未见异常 |                |
| 6.55  | 6.13 | 1.40 | 2.99 | 1.76 | 异常   | 脂肪肝声像          |
| 4.72  | 4.64 | 1.68 | 2.61 | 1.00 | 异常   | 胆囊结石           |
| 4.78  | 5.01 | 2.47 | 2.61 | 1.28 | 未见异常 |                |
| 4.55  | 5.94 | 1.30 | 2.58 | 1.94 | 未见异常 |                |
| 4.99  | 5.85 | 1.41 | 2.66 | 2.09 | 未见异常 |                |
| 5.63  | 5.79 | 2.27 | 3.16 | 1.50 | 异常   | 脂肪肝声像          |
| 5.89  | 5.39 | 0.95 | 2.92 | 1.61 | 异常   | 1、轻度脂肪肝声像;     |
| 5.75  | 7.40 | 1.39 | 4.46 | 1.79 | 未见异常 |                |
| 5.60  | 6.02 | 3.99 | 2.89 | 1.32 | 未见异常 |                |
| 5.36  | 4.38 | 0.92 | 2.26 | 1.52 | 异常   | 胆囊区强回声         |
| 4.22  | 6.74 | 3.30 | 3.80 | 1.52 | 未见异常 |                |
| 5.14  | 5.61 | 1.45 | 2.72 | 1.86 | 未见异常 |                |
| 4.80  | 5.71 | 2.50 | 2.84 | 1.62 | 异常   | 胆囊壁欠光滑、稍毛      |
| 5.30  | 6.78 | 3.10 | 3.21 | 1.81 | 未见异常 |                |
| 5.39  | 5.65 | 1.11 | 3.34 | 1.48 | 异常   | 肝囊肿            |
| 5.19  | 7.14 | 1.24 | 4.53 | 1.65 | 异常   | 脂肪肝声像。         |
| 5.29  | 5.92 | 1.19 | 3.04 | 1.86 | 异常   | 1、脂肪肝声像2、肝     |
| 6.41  | 5.60 | 2.14 | 3.09 | 1.28 | 异常   | 轻度脂肪肝声像        |
| 6.60  | 6.00 | 2.27 | 3.12 | 1.69 | 未见异常 |                |
| 6.77  | 4.14 | 2.05 | 2.10 | 1.52 | 未见异常 |                |
| 5.05  | 5.63 | 2.09 | 3.25 | 1.52 | 未见异常 |                |
| 7.18  | 4.08 | 0.73 | 1.73 | 1.50 | 未见异常 |                |
| 8.88  | 8.17 | 4.91 | 4.06 | 2.02 | 未见异常 |                |
| 6.44  | 8.22 | 1.69 | 4.88 | 1.62 | 异常   | 1. 肝多发囊肿2. 肝内  |
| 5.73  | 5.09 | 1.52 | 2.59 | 1.60 | 异常   | 轻度脂肪肝声像        |
| 4.37  | 5.31 | 0.76 | 2.65 | 1.84 | 未见异常 |                |
| 5.89  | 5.08 | 1.81 | 3.00 | 1.33 |      |                |
| 6.14  | 8.10 | 1.51 | 3.63 | 2.69 | 未见异常 |                |

|       |      |      |      |      |                |
|-------|------|------|------|------|----------------|
| 5.20  | 7.14 | 0.90 | 3.71 | 2.01 | 未见异常           |
| 4.84  | 5.63 | 0.65 | 3.12 | 1.57 | 异常 肝右叶内稍高回声结   |
| 4.87  | 5.59 | 2.50 | 2.95 | 1.51 | 异常 脂肪肝声像       |
| 5.24  | 4.85 | 2.88 | 2.28 | 1.41 | 未见异常           |
| 4.31  | 5.52 | 2.39 | 3.01 | 1.25 | 异常 轻度脂肪肝声像     |
| 5.32  | 4.79 | 1.17 | 2.48 | 1.43 | 未见异常           |
| 6.97  | 4.72 | 2.75 | 2.36 | 1.17 | 异常 脂肪肝声像。胆囊内   |
| 4.35  | 6.80 | 1.34 | 3.49 | 1.70 | 异常 肝多发性囊肿声像    |
| 5.66  | 5.26 | 1.26 | 2.81 | 1.53 | 异常 脂肪肝声像       |
| 4.86  | 4.50 | 1.25 | 2.43 | 1.28 | 异常 肝多发囊肿       |
| 5.59  | 6.63 | 1.94 | 3.45 | 1.75 | 未见异常           |
| 4.73  | 3.58 | 0.88 | 3.29 | 1.62 | 异常 肝左叶内稍高回声区   |
| 4.44  | 5.40 | 1.50 | 2.77 | 1.60 | 未见异常           |
| 4.98  | 4.51 | 0.94 | 2.36 | 1.52 | 异常 肝多发囊肿 肝内强   |
| 7.05  | 5.93 | 1.35 | 3.12 | 1.66 | 未见异常           |
| 5.88  | 4.54 | 0.96 | 2.28 | 1.60 | 异常 脾门处异常实质回声   |
| 5.44  | 7.38 | 3.43 | 4.23 | 1.51 | 异常 轻度脂肪肝       |
| 6.12  | 5.78 | 1.80 | 3.52 | 1.21 | 未见异常           |
| 4.50  | 4.47 | 1.70 | 2.22 | 1.40 |                |
| 5.00  | 5.28 | 5.60 | 1.80 | 1.29 | 未见异常           |
| 11.22 | 5.67 | 1.32 | 3.22 | 1.37 | 异常 胆囊壁稍强光点(考   |
| 5.47  | 5.88 | 1.25 | 3.27 | 1.50 | 异常 轻度脂肪肝声像     |
| 5.53  | 4.14 | 1.15 | 1.84 | 1.35 | 未见异常           |
| 4.59  | 4.79 | 2.02 | 2.27 | 1.45 |                |
| 4.97  | 4.20 | 0.78 | 1.82 | 1.67 | 未见异常           |
| 5.11  | 5.08 | 1.30 | 2.30 | 1.65 | 未见异常           |
| 5.10  | 4.82 | 1.19 | 2.52 | 1.57 | 异常 胆囊结石        |
| 4.57  | 6.83 | 2.10 | 3.68 | 1.84 | 异常 轻度脂肪肝声像     |
| 4.78  | 3.37 | 2.33 | 1.22 | 1.33 | 未见异常           |
| 5.27  | 6.37 | 2.77 | 3.18 | 1.77 | 未见异常           |
| 4.94  | 5.86 | 2.27 | 2.88 | 1.70 | 异常 胆囊多发性结石     |
| 4.70  | 5.22 | 0.66 | 2.41 | 1.74 | 未见异常           |
| 4.82  | 7.12 | 1.26 | 4.06 | 1.88 | 异常 腹部B超: 脂肪肝声像 |
| 5.00  | 4.32 | 1.80 | 2.31 | 1.21 | 异常 脂肪肝声像       |
| 4.96  | 5.08 | 1.72 | 2.56 | 1.53 | 异常 脂肪肝声像       |
| 5.17  | 4.73 | 0.90 | 3.17 | 1.01 | 异常 脂肪肝声像       |
| 4.75  | 6.02 | 1.18 | 2.87 | 2.05 | 未见异常           |
| 5.72  | 5.09 | 3.25 | 2.31 | 1.71 | 未见异常           |
| 5.10  | 4.27 | 0.84 | 1.45 | 2.14 | 未见异常           |
| 5.06  | 5.47 | 1.06 | 2.94 | 1.42 | 未见异常           |
| 5.43  | 5.78 | 7.71 | 2.49 | 2.07 | 未见异常           |
| 5.62  | 5.56 | 2.53 | 2.88 | 1.51 | 异常 脂肪肝声像       |
| 12.54 | 6.26 | 2.17 | 3.19 | 1.89 | 异常 脂肪肝声像       |
| 4.28  | 4.45 | 1.36 | 1.99 | 1.52 | 异常 胆囊结石        |
| 9.14  | 5.35 | 2.05 | 2.57 | 1.49 | 未见异常           |
| 4.63  | 5.49 | 0.64 | 1.90 | 2.26 | 未见异常           |
| 4.17  | 3.85 | 1.31 | 1.56 | 1.66 | 未见异常           |
| 5.52  | 5.45 | 1.10 | 3.11 | 1.54 | 异常 肝实质回声稍增粗    |
| 13.50 | 4.74 | 1.11 | 2.24 | 1.64 | 未见异常           |
| 5.55  | 6.61 | 2.66 | 3.65 | 1.73 | 未见异常           |
| 5.44  | 5.22 | 1.52 | 2.91 | 1.55 | 异常 轻度脂肪肝声像     |

|       |       |      |      |      |      |             |
|-------|-------|------|------|------|------|-------------|
| 4.22  | 4.65  | 1.20 | 2.60 | 1.35 | 异常   | 肝多发囊肿       |
| 5.07  | 7.76  | 1.00 | 4.78 | 1.63 | 异常   | 肝内囊性回声（考虑   |
| 6.15  | 10.73 | 5.83 | 4.39 | 1.99 | 异常   | 1.轻度脂肪肝声像2. |
| 5.95  | 6.69  | 0.98 | 3.23 | 2.17 | 异常   | 肝内低回声区      |
| 5.46  | 7.24  | 1.50 | 4.05 | 1.71 | 未见异常 |             |
| 6.81  | 6.49  | 1.01 | 4.06 | 1.38 | 异常   | 肝多发囊肿       |
| 11.07 | 5.05  | 2.61 | 2.48 | 1.46 | 异常   | 脂肪肝声像       |
| 4.35  | 6.70  | 1.55 | 3.07 | 2.23 | 未见异常 |             |
| 4.23  | 6.38  | 2.62 | 3.25 | 1.74 | 未见异常 |             |
| 4.64  | 4.50  | 0.93 | 1.89 | 1.86 | 未见异常 |             |
| 5.12  | 8.26  | 1.14 | 4.69 | 2.09 | 异常   | 肝胆脾胰B超：轻度肝  |
| 4.82  | 6.80  | 1.16 | 3.32 | 2.19 | 未见异常 |             |
| 6.32  | 5.15  | 4.95 | 1.63 | 1.66 | 异常   | 轻度脂肪肝声像，肝   |
| 5.47  | 4.89  | 3.69 | 2.06 | 1.52 | 未见异常 |             |
| 4.20  | 5.10  | 0.98 | 2.78 | 1.24 | 未见异常 |             |
| 5.05  | 6.35  | 1.61 | 3.50 | 1.60 | 未见异常 |             |
| 5.08  | 5.56  | 0.82 | 2.87 | 1.58 | 异常   | 肝内强回声斑：考虑   |
| 5.62  | 4.96  | 2.01 | 2.34 | 1.62 | 未见异常 |             |
| 4.99  | 4.92  | 0.93 | 2.85 | 1.30 | 异常   | 肝多发囊行回声     |
| 5.72  | 6.28  | 2.81 | 3.77 | 1.44 | 未见异常 |             |
| 9.15  | 8.25  | 3.35 | 4.34 | 1.70 | 异常   | 脂肪肝声像       |
| 7.13  | 5.05  | 1.57 | 2.26 | 1.84 | 未见异常 |             |
| 7.28  | 7.27  | 3.06 | 3.84 | 1.91 | 未见异常 |             |
| 5.15  | 5.40  | 1.46 | 2.74 | 1.61 | 未见异常 |             |
| 5.47  | 5.39  | 2.14 | 3.02 | 1.38 |      |             |
| 5.09  | 6.52  | 1.45 | 3.77 | 1.42 | 未见异常 |             |
| 4.47  | 4.91  | 1.01 | 2.27 | 1.79 | 未见异常 |             |
| 7.43  | 5.33  | 1.36 | 3.45 | 1.06 | 未见异常 |             |
| 5.34  | 6.56  | 1.84 | 3.19 | 1.63 | 未见异常 |             |
| 5.51  | 5.15  | 2.60 | 2.58 | 1.76 | 异常   | 1、脂肪肝声像2、胆  |
| 4.86  | 4.23  | 0.93 | 1.56 | 1.96 | 异常   | 腹部B超：肝多发囊   |
| 7.14  | 7.11  | 2.49 | 4.01 | 1.46 | 异常   | 胆囊息肉样病变     |
| 4.61  | 5.25  | 1.99 | 2.06 | 2.01 | 异常   | 胆囊内强回声（结石   |
| 6.38  | 6.51  | 2.96 | 3.27 | 1.67 | 异常   | 脂肪肝；胆囊偏小似   |
| 5.09  | 4.25  | 1.61 | 2.39 | 1.19 | 未见异常 |             |
| 5.04  | 4.90  | 2.29 | 2.45 | 1.24 | 未见异常 |             |
| 8.43  | 6.67  | 2.49 | 3.64 | 1.54 | 异常   | 脂肪肝声像，肝左叶   |
| 4.84  | 4.44  | 1.24 | 1.79 | 2.07 | 未见异常 |             |
| 5.36  | 4.79  | 1.99 | 2.40 | 1.46 | 异常   | 脂肪肝声像       |
| 5.26  | 6.85  | 3.53 | 3.71 | 1.67 | 异常   | 胆囊结石        |
| 5.34  | 8.02  | 5.39 | 3.41 | 1.95 | 异常   | 肝内强回声，考虑钙   |
| 7.10  | 4.49  | 2.42 | 2.33 | 1.38 | 异常   | 脂肪肝声像       |
| 4.70  | 6.62  | 3.69 | 3.47 | 1.75 | 异常   | 脂肪肝声像       |
| 5.29  | 4.86  | 0.59 | 2.20 | 1.81 | 异常   | 腹部B超：1、肝脏弥  |
| 4.32  | 6.32  | 3.56 | 3.34 | 1.34 | 异常   | 脂肪肝声像       |
| 5.89  | 3.79  | 0.76 | 1.51 | 1.60 | 未见异常 |             |
| 5.77  | 4.25  | 1.76 | 1.60 | 1.74 | 异常   | 脂肪肝声像，胆囊    |
| 5.99  | 6.11  | 1.93 | 3.16 | 1.87 | 异常   | 脂肪肝         |
| 4.84  | 7.83  | 1.60 | 4.48 | 1.81 | 异常   | 胆囊切除术后      |
| 22.12 | 6.34  | 2.06 | 3.42 | 1.68 | 异常   | 胆囊结石        |
| 5.61  | 11.56 | 1.58 | 7.51 | 1.52 | 异常   | 1、轻度脂肪肝声像；  |

|      |      |      |      |      |      |            |
|------|------|------|------|------|------|------------|
| 5.27 | 4.66 | 0.88 | 1.78 | 2.12 | 未见异常 |            |
| 4.90 | 6.18 | 0.64 | 2.60 | 2.26 | 未见异常 |            |
| 4.74 | 5.90 | 2.07 | 2.65 | 2.12 | 未见异常 |            |
| 5.03 | 4.20 | 1.11 | 2.24 | 1.43 | 异常   | 肝囊肿        |
| 4.46 | 6.41 | 2.80 | 3.54 | 1.35 | 未见异常 |            |
| 5.29 | 6.27 | 3.28 | 3.13 | 1.48 | 异常   | 轻度脂肪肝      |
| 6.73 | 4.93 | 0.97 | 2.51 | 1.55 | 未见异常 |            |
| 5.28 | 5.68 | 2.14 | 2.93 | 1.62 | 异常   | 1、轻度脂肪肝，2、 |
| 4.59 | 4.78 | 2.02 | 2.51 | 1.32 | 异常   | 1、脂肪肝；2、胆囊 |
| 5.60 | 3.12 | 1.91 | 1.36 | 1.14 | 异常   | 轻度脂肪肝声像    |
| 5.87 | 6.47 | 1.93 | 3.64 | 1.57 | 未见异常 |            |
| 5.42 | 4.97 | 1.23 | 2.87 | 1.33 | 未见异常 |            |
| 5.49 | 5.89 | 3.06 | 2.47 | 2.03 | 异常   | 肝脏实质光点回声稍  |
| 4.46 | 6.07 | 2.16 | 2.82 | 1.85 | 未见异常 |            |
| 7.25 | 6.46 | 2.15 | 3.78 | 1.46 | 异常   | 轻度脂肪肝声像    |
| 4.94 | 6.13 | 1.39 | 3.00 | 2.06 | 未见异常 |            |
| 4.82 | 5.27 | 0.56 | 2.07 | 2.01 | 未见异常 |            |
| 4.45 | 7.13 | 2.65 | 3.97 | 1.60 | 异常   | 轻度脂肪肝声像；肝  |
| 4.89 | 4.43 | 2.23 | 2.44 | 1.21 | 异常   | 轻度脂肪肝声像。   |
| 5.56 | 5.54 | 2.26 | 2.78 | 1.77 | 未见异常 |            |
| 4.98 | 7.45 | 2.64 | 4.06 | 1.81 | 异常   | 胆囊结石       |
| 6.59 | 6.62 | 1.37 | 4.06 | 1.27 | 未见异常 |            |
| 5.13 | 5.62 | 1.31 | 2.80 | 1.81 | 异常   | 轻度脂肪肝声像；肝  |
| 5.03 | 4.02 | 1.29 | 1.47 | 1.91 |      |            |
| 9.05 | 5.51 | 0.58 | 2.79 | 1.67 | 异常   | 胆囊充满型结石可能  |
| 5.63 | 6.92 | 2.68 | 3.52 | 1.72 | 异常   | 1、轻度脂肪肝声像； |
| 5.03 | 6.30 | 1.84 | 3.56 | 1.62 | 异常   | 轻度脂肪肝声像；胆  |
| 5.85 | 5.64 | 0.94 | 2.93 | 1.44 | 未见异常 |            |
| 7.48 | 6.42 | 2.81 | 3.61 | 1.50 | 未见异常 |            |
| 5.01 | 8.57 | 1.14 | 5.40 | 2.01 | 未见异常 |            |
| 5.33 | 6.64 | 1.49 | 3.54 | 1.65 | 未见异常 |            |
| 5.04 | 5.10 | 2.40 | 2.48 | 1.41 | 异常   | 轻度脂肪肝声像    |
| 4.48 | 5.54 | 2.40 | 2.27 | 1.95 | 异常   | 腹部B超：轻度脂肪肝 |
| 5.35 | 5.10 | 1.93 | 2.98 | 1.32 | 未见异常 |            |
| 5.31 | 6.12 | 0.83 | 3.13 | 2.28 | 未见异常 |            |
| 5.92 | 5.35 | 2.51 | 2.53 | 1.43 | 未见异常 |            |
| 6.00 | 5.80 | 0.91 | 3.02 | 2.05 | 未见异常 |            |
| 5.04 | 5.61 | 0.80 | 2.91 | 1.57 | 未见异常 |            |
| 8.78 | 5.75 | 2.76 | 2.76 | 1.59 | 未见异常 |            |
| 5.93 | 7.34 | 2.08 | 4.08 | 1.64 | 异常   | 1、轻度脂肪肝声像； |
| 7.15 | 7.06 | 2.44 | 3.98 | 1.74 | 未见异常 |            |
| 5.28 | 6.27 | 2.25 | 2.87 | 1.63 | 未见异常 |            |
| 6.26 | 6.94 | 2.78 | 3.55 | 1.61 | 未见异常 |            |
| 5.13 | 3.78 | 0.63 | 2.02 | 1.23 | 未见异常 |            |
| 4.45 | 5.43 | 1.64 | 3.40 | 1.16 | 异常   | 肝内囊性回声     |
| 5.01 | 6.56 | 1.76 | 3.40 | 2.02 | 异常   | 轻度脂肪肝声像    |
| 5.18 | 5.84 | 1.60 | 3.00 | 1.67 | 未见异常 |            |
| 6.00 | 5.90 | 3.18 | 3.31 | 1.15 | 异常   | 脂肪肝声像；胆囊内  |
| 6.40 | 5.20 | 2.03 | 2.63 | 1.50 | 异常   | 肝胆脾胰B超：脂肪肝 |
| 5.13 | 5.27 | 0.76 | 2.43 | 2.00 | 异常   | 胆囊息肉样病变    |
| 6.06 | 4.95 | 2.85 | 2.47 | 1.20 | 异常   | 轻度脂肪肝声像    |

|       |      |       |      |      |      |              |
|-------|------|-------|------|------|------|--------------|
| 5.19  | 5.43 | 2.80  | 2.82 | 1.24 | 未见异常 |              |
| 5.40  | 4.27 | 2.17  | 2.30 | 1.11 | 异常   | 肝囊肿          |
| 5.83  | 4.50 | 0.82  | 2.58 | 1.44 | 未见异常 |              |
| 5.51  | 9.20 | 7.58  | 2.98 | 1.44 | 异常   | 轻度脂肪肝声像      |
| 5.32  | 5.54 | 3.92  | 2.61 | 1.44 | 异常   | 脂肪肝声像        |
| 6.69  | 7.75 | 1.98  | 4.33 | 1.59 | 异常   | 多发性胆囊结石      |
| 7.02  | 5.48 | 0.89  | 2.25 | 2.17 | 未见异常 |              |
| 4.94  | 6.99 | 1.17  | 3.17 | 2.62 | 未见异常 |              |
| 5.79  | 6.28 | 1.70  | 3.52 | 1.63 | 未见异常 |              |
| 5.11  | 5.63 | 0.96  | 2.75 | 1.72 | 未见异常 |              |
| 5.61  | 6.51 | 3.64  | 3.18 | 1.58 | 未见异常 |              |
| 4.93  | 7.34 | 1.40  | 4.26 | 1.75 | 异常   | 轻度脂肪肝声像      |
| 5.50  | 5.99 | 1.66  | 2.88 | 1.99 | 异常   | 肝内囊性回声（考虑    |
| 4.92  | 4.94 | 0.88  | 2.26 | 2.06 | 未见异常 |              |
| 7.23  | 6.52 | 2.65  | 3.66 | 1.45 | 异常   | 脂肪肝声像        |
| 5.32  | 4.84 | 2.64  | 2.22 | 1.46 | 异常   | 脂肪肝声像        |
| 5.77  | 5.69 | 1.18  | 3.30 | 1.44 | 异常   | 肝囊肿          |
| 5.44  | 3.80 | 0.66  | 1.07 | 1.83 | 未见异常 |              |
| 14.37 | 5.81 | 4.04  | 2.58 | 1.49 | 异常   | 脂肪肝声像        |
| 5.38  | 5.38 | 0.89  | 2.94 | 1.79 | 未见异常 |              |
| 5.22  | 6.14 | 2.86  | 3.54 | 1.36 | 异常   | 脂肪肝声像        |
| 4.40  | 4.37 | 0.87  | 2.38 | 1.35 | 未见异常 |              |
| 5.11  | 6.19 | 1.17  | 3.16 | 1.83 | 未见异常 |              |
| 14.68 | 5.77 | 7.15  | 1.81 | 1.28 | 异常   | 1, 脂肪肝声像2, 肝 |
| 9.12  | 6.20 | 1.79  | 3.81 | 1.29 | 异常   | 脂肪肝声像, 胆囊内   |
| 6.06  | 6.01 | 2.33  | 2.99 | 1.89 | 未见异常 |              |
| 4.93  | 5.56 | 1.71  | 3.05 | 1.58 | 异常   | 胆囊壁欠光滑       |
| 5.17  | 7.83 | 1.11  | 4.30 | 1.99 | 未见异常 |              |
| 4.84  | 4.84 | 0.99  | 2.39 | 1.50 | 未见异常 |              |
| 6.00  | 4.62 | 0.75  | 2.42 | 1.22 | 异常   | 1、轻度脂肪肝声像2   |
| 5.59  | 5.02 | 1.11  | 2.85 | 1.48 | 未见异常 |              |
| 4.64  | 5.61 | 2.61  | 2.80 | 1.39 | 未见异常 |              |
| 4.80  | 3.97 | 0.59  | 1.95 | 1.52 | 未见异常 |              |
| 4.94  | 5.00 | 2.10  | 2.72 | 1.51 |      |              |
| 5.51  | 4.98 | 0.87  | 2.56 | 1.54 | 未见异常 |              |
| 6.31  | 3.67 | 1.41  | 1.93 | 1.01 | 未见异常 |              |
| 5.01  | 6.19 | 1.04  | 3.05 | 1.89 |      |              |
| 7.04  | 6.55 | 1.99  | 3.31 | 1.68 | 未见异常 |              |
| 5.69  | 6.87 | 10.84 | 1.07 | 1.06 | 异常   | 1、轻度脂肪肝声像;   |
| 5.89  | 5.77 | 2.49  | 2.83 | 1.35 | 未见异常 |              |
| 4.94  | 6.36 | 1.45  | 3.48 | 1.99 | 未见异常 |              |
| 5.67  | 5.98 | 1.35  | 3.79 | 1.25 | 异常   | 轻度脂肪肝声像。     |
| 4.43  | 9.46 | 1.08  | 5.42 | 2.36 | 未见异常 |              |
| 4.58  | 4.80 | 2.06  | 2.45 | 1.22 | 未见异常 |              |
| 9.14  | 3.21 | 1.22  | 1.45 | 1.23 | 异常   | 1、脂肪肝声像2、胆   |
| 4.46  | 6.39 | 1.98  | 3.59 | 1.71 | 异常   | 轻度脂肪肝声像      |
| 4.68  | 5.97 | 0.80  | 2.74 | 1.88 | 未见异常 |              |
| 6.14  | 5.11 | 3.13  | 2.45 | 1.45 | 未见异常 |              |
| 5.82  | 6.25 | 1.11  | 3.48 | 1.87 | 异常   | 胆囊内稍强回声团,    |
| 4.80  | 5.40 | 1.16  | 2.81 | 1.51 | 异常   | 胆囊息肉样病变      |
| 3.90  | 5.78 | 1.35  | 2.33 | 2.22 | 异常   | 腹部B超: 肝内囊性[  |

|       |      |      |      |      |                 |
|-------|------|------|------|------|-----------------|
| 4.24  | 6.03 | 1.10 | 3.60 | 1.53 | 未见异常            |
| 5.03  | 4.66 | 1.25 | 1.88 | 2.02 | 异常 轻度脂肪肝        |
| 5.33  | 5.75 | 1.05 | 2.98 | 1.57 | 异常 轻度脂肪肝声像      |
| 5.01  | 4.84 | 0.76 | 2.06 | 1.85 | 未见异常            |
| 4.76  | 6.52 | 3.37 | 3.20 | 1.56 | 未见异常            |
| 4.90  | 5.31 | 2.06 | 3.01 | 1.46 | 异常 轻度脂肪肝声像      |
| 5.62  | 6.02 | 1.15 | 3.42 | 1.63 | 未见异常            |
| 11.00 | 8.43 | 3.43 | 4.41 | 2.24 | 未见异常            |
| 5.10  | 6.31 | 1.74 | 3.73 | 1.45 | 异常 胆囊多发结石       |
| 5.10  | 6.96 | 3.14 | 3.33 | 1.79 | 异常 轻度脂肪肝声像      |
| 4.97  | 4.76 | 1.15 | 2.01 | 1.69 | 未见异常            |
| 10.48 | 6.67 | 2.14 | 3.72 | 1.55 | 未见异常            |
| 4.55  | 1.91 | 1.43 | 2.53 | 1.91 | 异常 1、肝囊肿； 2、胆   |
| 6.56  | 5.82 | 3.25 | 3.10 | 1.50 | 异常 1, 轻度脂肪肝声像,  |
| 6.01  | 1.65 | 1.65 | 1.70 | 1.52 | 未见异常            |
| 5.92  | 6.99 | 3.96 | 3.55 | 1.43 | 异常 脂肪肝声像        |
| 7.07  | 5.76 | 0.95 | 2.72 | 1.84 | 异常 胆囊结石         |
| 4.09  | 6.18 | 2.22 | 3.15 | 1.82 | 未见异常            |
| 4.73  | 6.46 | 1.28 | 3.39 | 1.88 | 未见异常            |
| 4.88  | 9.15 | 2.02 | 4.52 | 2.33 | 未见异常            |
| 6.77  | 4.31 | 1.83 | 2.15 | 1.12 | 未见异常            |
| 6.12  | 6.19 | 1.31 | 3.45 | 1.69 | 异常 1. 轻度脂肪肝声像2. |
| 5.63  | 5.67 | 1.95 | 3.15 | 1.53 | 异常 脂肪肝声像        |
| 4.34  | 4.94 | 0.96 | 2.38 | 1.62 | 未见异常            |
| 7.18  | 7.60 | 2.40 | 4.45 | 1.87 | 异常 胆囊多发结石       |
| 4.65  | 4.43 | 1.05 | 1.84 | 1.68 | 未见异常            |
| 5.17  | 6.33 | 1.20 | 3.49 | 1.50 | 未见异常            |
| 4.35  | 4.62 | 0.65 | 2.31 | 1.54 | 未见异常            |
| 7.92  | 5.22 | 4.56 | 2.35 | 1.26 | 异常 轻度脂肪肝声像      |
| 4.66  | 6.39 | 1.45 | 3.62 | 1.70 | 异常 轻度脂肪肝声像      |
| 7.47  | 6.47 | 2.32 | 3.58 | 1.45 | 未见异常            |
| 4.99  | 5.72 | 1.02 | 2.87 | 1.95 | 异常 脂肪肝声像。肝内囊    |
| 4.77  | 6.54 | 0.92 | 3.48 | 1.76 | 未见异常            |
| 5.80  | 6.55 | 1.11 | 2.97 | 2.01 | 未见异常            |
| 4.14  | 5.48 | 1.20 | 2.94 | 1.66 | 异常 肝囊肿          |
| 4.93  | 4.09 | 1.79 | 1.83 | 1.57 | 异常 腹部B超: 胆囊异常[  |
| 4.70  | 6.59 | 2.30 | 3.45 | 1.93 | 异常 肝内强回声斑, 考虑   |
| 4.96  | 7.09 | 2.55 | 3.25 | 2.04 | 异常 轻度脂肪肝、肝多发    |
| 5.99  | 5.48 | 0.99 | 2.54 | 1.79 | 未见异常            |
| 4.59  | 6.96 | 1.72 | 3.97 | 1.70 | 异常 脂肪肝声像; 胆囊内   |
| 5.41  | 6.05 | 0.67 | 2.83 | 1.91 | 未见异常            |
| 5.27  | 7.08 | 1.69 | 4.68 | 1.44 | 异常 腹部B超: 1、脂肪肝  |
| 4.77  | 5.72 | 1.30 | 3.05 | 1.61 | 未见异常            |
| 5.62  | 6.60 | 1.13 | 3.32 | 1.98 | 异常 肝胆胰彩超: 1、轻   |
| 4.71  | 4.99 | 2.00 | 2.43 | 1.51 | 异常 餐后胆囊(未除胆囊    |
| 7.29  | 3.79 | 3.56 | 1.44 | 1.26 | 异常 1. 胆囊点状弱强回声  |
| 4.89  | 6.58 | 1.48 | 3.99 | 1.53 | 异常 轻度脂肪肝声像      |
| 4.42  | 5.44 | 1.59 | 2.48 | 1.87 | 未见异常            |
| 19.14 | 5.55 | 2.65 | 2.86 | 1.41 | 异常 轻度脂肪肝声像      |
| 5.01  | 5.22 | 0.92 | 2.40 | 2.13 | 异常 1. 肝多发囊性回声(  |
| 6.93  | 4.34 | 0.91 | 1.75 | 1.84 | 未见异常            |

|       |      |      |      |      |      |             |
|-------|------|------|------|------|------|-------------|
| 4.65  | 3.97 | 2.66 | 1.86 | 1.22 | 异常   | 脂肪肝声像       |
| 5.58  | 5.03 | 1.22 | 2.44 | 1.56 | 未见异常 |             |
| 5.66  | 7.49 | 1.33 | 3.62 | 2.35 | 未见异常 |             |
| 4.92  | 5.23 | 1.41 | 2.71 | 1.65 | 异常   | 肝内囊性回声（考虑   |
| 11.86 | 5.48 | 1.07 | 2.79 | 1.72 | 异常   | 脂肪肝声像       |
| 5.76  | 5.91 | 2.45 | 3.06 | 1.61 | 异常   | 轻度脂肪肝声像     |
| 4.88  | 5.42 | 0.68 | 1.57 | 2.76 | 未见异常 |             |
| 9.05  | 3.81 | 0.84 | 1.63 | 1.40 | 异常   | 胆囊结石        |
| 7.36  | 4.71 | 5.06 | 1.88 | 1.07 | 异常   | 轻度脂肪肝声像     |
| 5.40  | 6.71 | 1.77 | 4.12 | 1.58 | 异常   | 脂肪肝声像       |
| 5.97  | 6.51 | 2.15 | 3.87 | 1.70 | 异常   | 脂肪肝声像       |
| 4.75  | 5.52 | 1.14 | 2.95 | 1.62 | 异常   | 肝多发囊性回声(考虑  |
| 6.60  | 6.19 | 1.56 | 3.54 | 1.73 | 异常   | 1肝内强回声（钙化灶  |
| 5.36  | 6.92 | 0.92 | 3.56 | 2.03 | 异常   | 轻度脂肪肝；肝实质   |
| 5.05  | 4.95 | 0.63 | 2.67 | 1.59 |      |             |
| 4.88  | 6.20 | 0.99 | 3.38 | 1.69 | 异常   | 脂肪肝声像；胆囊内   |
| 6.31  | 4.22 | 1.18 | 2.12 | 1.33 | 异常   | 肝囊肿         |
| 7.65  | 7.93 | 1.42 | 4.76 | 1.77 | 未见异常 |             |
| 9.18  | 7.02 | 0.98 | 3.94 | 1.99 | 未见异常 |             |
| 4.85  | 5.97 | 1.96 | 3.50 | 1.56 | 未见异常 |             |
| 13.55 | 7.13 | 1.44 | 3.89 | 1.94 | 异常   | 1、脂肪肝声像     |
| 5.29  | 7.41 | 1.64 | 4.99 | 1.43 | 异常   | 轻度脂肪肝声像。    |
| 4.75  | 5.39 | 1.26 | 2.72 | 1.53 | 异常   | 胆囊结石        |
| 5.77  | 5.87 | 1.67 | 3.51 | 1.50 | 异常   | 脂肪肝声像       |
| 4.97  | 6.98 | 2.93 | 3.71 | 2.00 | 异常   | 1、轻度脂肪肝声像，  |
| 4.31  | 5.01 | 1.05 | 2.48 | 1.38 | 异常   | 肝内强回声改变考虑   |
| 4.56  | 6.86 | 6.44 | 1.98 | 1.51 | 未见异常 |             |
| 4.95  | 4.25 | 1.14 | 2.16 | 1.34 | 异常   | 轻度脂肪肝声像、肝   |
| 5.26  | 7.02 | 2.58 | 3.86 | 1.86 | 异常   | 肝囊肿         |
| 5.23  | 5.33 | 1.39 | 3.04 | 1.34 | 未见异常 |             |
| 5.21  | 6.24 | 1.35 | 3.19 | 1.79 | 未见异常 |             |
| 4.81  | 6.62 | 3.08 | 3.58 | 1.44 | 异常   | 1.脂肪肝声像2.肝囊 |
| 6.18  | 6.68 | 6.55 | 2.14 | 1.64 | 异常   | 脂肪肝声像       |
| 6.41  | 4.91 | 1.38 | 2.79 | 1.46 | 异常   | 脂肪肝声像；肝囊肿   |
| 7.35  | 5.58 | 0.83 | 3.27 | 1.71 | 未见异常 |             |
| 4.86  | 6.09 | 1.47 | 3.75 | 1.50 | 异常   | 轻度脂肪肝声像、胆   |
| 6.06  | 6.37 | 1.69 | 3.40 | 1.87 | 异常   | 腹部B超：胆囊多发   |
| 7.49  | 7.06 | 3.89 | 3.79 | 1.38 | 异常   | 脂肪肝声像       |
| 8.49  | 6.68 | 2.63 | 3.76 | 1.55 | 异常   | 脂肪肝声像       |
| 5.23  | 6.20 | 2.78 | 3.33 | 1.67 | 异常   | 脂肪肝声像、胆囊结   |
| 5.63  | 5.96 | 3.22 | 2.98 | 1.40 | 异常   | 腹部B超:1、肝囊肿2 |
| 6.22  | 6.66 | 3.51 | 3.65 | 1.49 | 异常   | 胆囊结石        |
| 4.90  | 4.80 | 1.64 | 2.16 | 1.70 | 未见异常 |             |
| 5.29  | 4.73 | 3.80 | 1.95 | 1.29 | 异常   | 1 轻度脂肪肝，2 胆 |
| 6.13  | 5.54 | 1.14 | 2.95 | 1.78 | 异常   | 肝脏实质光点回声增   |
| 5.46  | 6.37 | 2.17 | 3.58 | 1.50 | 未见异常 |             |
| 4.97  | 4.34 | 1.02 | 1.98 | 1.59 | 异常   | 脂肪肝；胆囊结石；   |
| 6.05  | 5.08 | 1.35 | 2.50 | 1.58 | 未见异常 |             |
| 8.14  | 7.37 | 1.89 | 4.23 | 1.73 | 异常   | 脂肪肝声像       |
| 4.59  | 4.76 | 0.99 | 2.31 | 1.60 | 异常   | 肝小囊肿 胆囊结石   |
| 5.29  | 2.66 | 0.61 | 1.07 | 1.02 | 未见异常 |             |

|       |      |       |      |      |                |
|-------|------|-------|------|------|----------------|
| 4.18  | 6.25 | 3.73  | 3.10 | 1.30 | 未见异常           |
| 5.01  | 6.21 | 1.19  | 3.64 | 1.42 | 异常 1、脂肪肝声像； 2、 |
| 4.77  | 6.05 | 1.62  | 3.21 | 1.66 | 异常 轻度脂肪肝声像     |
| 5.11  | 7.17 | 1.37  | 3.76 | 2.03 | 未见异常           |
| 5.14  | 5.70 | 1.32  | 3.16 | 1.58 | 未见异常           |
| 5.78  | 5.79 | 0.85  | 3.59 | 1.14 | 未见异常           |
| 7.09  | 5.70 | 10.49 | 0.77 | 1.02 | 未见异常           |
| 4.93  | 5.20 | 0.69  | 2.69 | 1.79 | 未见异常           |
| 5.45  | 7.15 | 0.83  | 4.07 | 1.98 | 异常 肝囊肿         |
| 8.23  | 5.15 | 4.93  | 2.08 | 1.33 | 异常 轻度脂肪肝声像     |
| 5.39  | 5.49 | 3.05  | 3.03 | 1.23 | 异常 1、脂肪肝声像     |
| 6.41  | 6.00 | 7.95  | 1.35 | 1.26 | 异常 胆囊结石        |
| 5.48  | 6.09 | 2.58  | 3.39 | 1.55 | 异常 轻度脂肪肝声像；肝   |
| 4.65  | 5.04 | 1.03  | 2.13 | 1.77 | 未见异常           |
| 7.40  | 5.49 | 5.74  | 2.17 | 1.36 | 异常 脂肪肝声像       |
| 5.42  | 6.00 | 3.00  | 3.31 | 1.55 | 异常 胆囊息肉样病变     |
| 5.48  | 6.07 | 2.78  | 3.09 | 1.63 | 异常 脂肪肝声像       |
| 5.10  | 6.14 | 1.40  | 2.91 | 1.95 | 异常 肝内多发稍强回声小   |
| 6.39  | 5.51 | 1.54  | 2.57 | 1.94 | 异常 脂肪肝声像       |
| 6.37  | 5.04 | 1.50  | 2.76 | 1.39 | 异常 轻度脂肪肝声像     |
| 7.09  | 5.06 | 1.56  | 2.80 | 1.28 | 未见异常           |
| 12.17 | 7.08 | 2.20  | 4.24 | 1.70 | 未见异常           |
| 5.05  | 7.00 | 2.77  | 3.91 | 1.74 |                |
| 4.87  | 5.37 | 0.75  | 1.90 | 2.43 | 未见异常           |
| 5.10  | 7.14 | 1.72  | 4.13 | 1.66 | 未见异常           |
| 6.21  | 6.07 | 2.34  | 3.19 | 1.79 | 未见异常           |
| 11.25 | 5.18 | 1.84  | 3.08 | 1.41 | 异常 腹部B超：1、轻度脂  |
| 5.35  | 2.52 | 0.70  | 0.66 | 1.43 | 异常 肝小囊肿,胆囊切除   |
| 4.30  | 7.79 | 2.83  | 4.08 | 1.71 | 异常 脂肪肝；肝右叶低回   |
| 4.92  | 7.49 | 1.70  | 4.21 | 7.89 | 异常 轻度脂肪肝声像     |
| 5.32  | 4.97 | 1.87  | 2.71 | 1.50 | 未见异常           |
| 5.48  | 5.37 | 2.68  | 2.91 | 1.22 | 异常 肝内强回声斑，考虑   |
| 6.43  | 5.32 | 1.03  | 2.73 | 1.58 | 异常 轻度脂肪肝声像     |
| 4.96  | 6.64 | 1.76  | 3.48 | 1.60 | 异常 胆囊壁稍毛糙      |
| 6.12  | 4.14 | 1.45  | 2.20 | 0.96 | 异常 脂肪肝声像       |
| 5.67  | 3.21 | 1.01  | 1.45 | 1.29 | 未见异常           |
| 5.49  | 5.45 | 0.90  | 2.56 | 1.76 | 异常 胆囊多发结石      |
| 5.27  | 6.74 | 1.36  | 3.46 | 2.13 | 未见异常           |
| 7.47  | 4.95 | 1.12  | 2.48 | 1.45 | 异常 胆囊结石        |
| 5.11  | 4.99 | 0.96  | 2.67 | 1.68 | 未见异常           |
| 7.42  | 5.95 | 0.96  | 3.49 | 1.75 | 异常 胆囊壁强回声：结石   |
| 4.84  | 7.00 | 1.91  | 3.68 | 2.15 | 异常 轻度脂肪肝声像     |
| 4.52  | 5.35 | 1.56  | 2.84 | 1.58 | 未见异常           |
| 4.73  | 5.18 | 0.99  | 2.63 | 1.84 | 未见异常           |
| 5.32  | 7.52 | 2.55  | 4.25 | 1.79 | 未见异常           |
| 29.43 | 4.57 | 4.99  | 1.71 | 1.12 | 异常 轻度脂肪肝       |
| 6.11  | 4.98 | 1.36  | 2.73 | 1.22 | 异常 轻度脂肪肝声像     |
| 5.13  | 6.45 | 1.15  | 3.32 | 1.83 | 未见异常           |
| 6.02  | 5.18 | 1.11  | 3.00 | 1.49 | 异常 轻度脂肪肝声像     |
| 5.18  | 5.38 | 1.58  | 2.78 | 1.67 | 异常 轻度脂肪肝声像；2、  |
| 4.76  | 6.49 | 1.68  | 3.83 | 1.64 | 异常 胆囊内强回声（考虑   |

|       |      |      |      |      |      |             |
|-------|------|------|------|------|------|-------------|
| 6.10  | 7.27 | 1.04 | 4.55 | 1.96 | 异常   | 腹部B超：胆囊结石   |
| 5.47  | 5.27 | 1.25 | 2.97 | 1.53 | 异常   | 肝胆胰彩超：肝内囊   |
| 5.36  | 5.30 | 1.39 | 2.57 | 1.95 | 异常   | 肝囊肿         |
| 4.36  | 4.81 | 1.04 | 2.54 | 1.30 | 未见异常 |             |
| 6.81  | 5.82 | 2.13 | 3.16 | 1.33 | 异常   | 轻度脂肪肝声像     |
| 5.13  | 5.97 | 2.72 | 3.31 | 1.49 | 异常   | 胆囊内强回声（考虑   |
| 4.33  | 6.18 | 1.61 | 3.10 | 1.79 | 异常   | 肝囊肿         |
| 4.33  | 5.19 | 2.96 | 2.66 | 1.15 | 异常   | 轻度脂肪肝、肝囊肿   |
| 4.89  | 4.23 | 2.78 | 1.90 | 1.40 | 异常   | 胆囊结石        |
| 15.84 | 3.99 | 1.37 | 1.80 | 1.59 | 异常   | 轻度脂肪肝声像     |
| 5.07  | 5.41 | 1.32 | 2.38 | 2.12 | 未见异常 |             |
| 7.92  | 7.62 | 1.48 | 4.96 | 1.72 | 异常   | 轻度脂肪肝声像     |
| 4.47  | 6.27 | 1.02 | 3.15 | 1.86 | 异常   | 肝实质回声稍增粗    |
| 4.96  | 5.66 | 2.17 | 2.83 | 1.83 | 异常   | 肝内囊性回声（考虑   |
| 6.63  | 3.70 | 1.57 | 1.55 | 1.61 | 未见异常 |             |
| 5.28  | 5.25 | 2.23 | 2.74 | 1.66 | 异常   | 胆囊结石        |
| 4.69  | 6.42 | 1.32 | 3.48 | 1.84 | 未见异常 |             |
| 6.03  | 5.20 | 0.66 | 3.00 | 1.54 | 未见异常 |             |
| 4.27  | 6.49 | 1.68 | 3.74 | 1.50 | 未见异常 |             |
| 5.10  | 6.72 | 0.92 | 3.75 | 1.83 | 未见异常 |             |
| 5.18  | 4.43 | 1.27 | 2.12 | 1.39 | 异常   | 所属范围内脂肪肝声   |
| 4.89  | 6.62 | 1.29 | 3.88 | 1.81 | 异常   | 脂肪肝声像。      |
| 4.04  | 7.64 | 3.03 | 4.18 | 1.57 | 未见异常 |             |
| 7.33  | 4.28 | 1.75 | 2.38 | 1.37 | 异常   | 轻度脂肪肝声像；肝   |
| 6.22  | 6.30 | 1.78 | 3.10 | 1.84 | 异常   | 轻度脂肪肝声像     |
| 5.92  | 4.49 | 1.21 | 2.36 | 1.52 | 异常   | 肝胆胰彩超：轻度脂   |
| 5.69  | 6.16 | 1.94 | 3.45 | 1.58 | 异常   | 轻度脂肪肝、肝囊肿   |
| 4.73  | 5.40 | 2.60 | 3.33 | 1.05 | 异常   | 脂肪肝声像，胆脾胰   |
| 4.68  | 6.11 | 1.47 | 3.25 | 1.63 | 异常   | 肝小囊肿        |
| 8.64  | 6.89 | 1.35 | 3.65 | 1.95 | 未见异常 |             |
| 4.29  | 6.61 | 1.67 | 3.47 | 1.96 | 未见异常 |             |
| 6.25  | 5.50 | 1.81 | 2.65 | 1.74 | 未见异常 |             |
| 7.20  | 3.98 | 2.36 | 2.08 | 1.17 | 异常   | 腹部B超：1、肝囊肿  |
| 4.91  | 6.10 | 1.11 | 3.61 | 1.57 | 异常   | 胆囊内强回声（考虑   |
| 4.26  | 4.27 | 0.84 | 1.68 | 1.79 | 异常   | 轻度脂肪肝声像     |
| 5.52  | 3.95 | 2.22 | 1.82 | 1.24 | 未见异常 |             |
| 6.43  | 7.03 | 2.42 | 4.18 | 1.58 | 未见异常 |             |
| 8.75  | 6.43 | 2.44 | 3.42 | 1.52 | 异常   | 轻度脂肪肝       |
| 16.75 | 6.85 | 2.44 | 3.33 | 2.12 | 异常   | 轻度脂肪声像      |
| 6.13  | 8.69 | 1.94 | 4.88 | 1.89 | 未见异常 |             |
| 4.43  | 6.12 | 0.92 | 3.15 | 1.71 | 未见异常 |             |
| 5.16  | 4.70 | 2.39 | 2.19 | 1.54 | 异常   | 轻度脂肪肝声像     |
| 8.30  | 4.90 | 2.71 | 2.30 | 1.33 | 异常   | 轻度脂肪肝       |
| 5.69  | 1.94 | 1.88 | 2.53 | 1.42 | 异常   | 肝囊肿         |
| 4.89  | 8.20 | 2.22 | 4.86 | 1.88 | 异常   | 胆囊内强回声（考虑   |
| 9.72  | 8.42 | 4.12 | 4.63 | 1.54 | 异常   | 轻度脂肪肝声像、胆   |
| 15.62 | 5.32 | 3.58 | 2.82 | 1.21 | 异常   | 1.脂肪肝声像2.胆囊 |
| 5.42  | 6.43 | 6.94 | 1.71 | 1.34 | 异常   | 腹部B超：胆囊多发   |
| 6.12  | 3.17 | 0.91 | 0.76 | 1.93 | 未见异常 |             |
| 4.66  | 4.18 | 1.86 | 2.23 | 1.26 | 异常   | 1、轻度脂肪肝声像；  |
| 4.49  | 5.03 | 0.78 | 2.35 | 1.74 | 未见异常 |             |

|       |       |      |      |      |      |             |
|-------|-------|------|------|------|------|-------------|
| 5.43  | 6.48  | 2.30 | 3.69 | 1.42 | 异常   | 轻度脂肪肝       |
| 5.38  | 4.53  | 3.89 | 2.15 | 1.40 | 未见异常 |             |
| 4.86  | 6.67  | 1.85 | 3.31 | 1.97 | 异常   | 肝囊肿         |
| 5.65  | 5.36  | 1.21 | 2.63 | 1.97 | 异常   | 轻度脂肪肝声像     |
| 5.20  | 4.75  | 0.98 | 2.23 | 1.87 | 异常   | 胆囊内强回声(考虑结  |
| 2.87  | 4.97  | 3.56 | 2.29 | 1.63 | 异常   | 轻度脂肪肝声像     |
| 4.80  | 5.73  | 2.08 | 2.95 | 1.76 | 异常   | 1、脂肪肝声像 2、胆 |
| 6.72  | 5.20  | 1.40 | 2.46 | 1.73 |      |             |
| 4.98  | 4.49  | 0.91 | 2.39 | 1.43 | 异常   | 轻度脂肪肝声像     |
| 4.41  | 5.49  | 2.17 | 2.97 | 1.33 | 未见异常 |             |
| 5.37  | 7.04  | 3.35 | 3.97 | 1.61 | 未见异常 |             |
| 6.28  | 6.54  | 3.69 | 3.70 | 1.58 | 异常   | 轻度脂肪肝声像     |
| 4.61  | 4.80  | 1.06 | 2.11 | 1.73 | 未见异常 |             |
| 5.15  | 5.69  | 0.88 | 2.91 | 1.52 | 异常   | 肝小囊肿        |
| 4.43  | 6.25  | 0.85 | 3.57 | 1.60 | 异常   | 胆囊内异常声像     |
| 5.10  | 4.44  | 1.26 | 2.24 | 1.54 | 异常   | 1、脂肪肝声像, 2、 |
| 4.80  | 7.96  | 2.89 | 4.33 | 1.93 | 未见异常 |             |
| 7.48  | 6.76  | 1.36 | 4.09 | 1.72 |      |             |
| 5.42  | 4.54  | 0.89 | 2.07 | 1.76 | 异常   | 1、轻度脂肪肝声像;  |
| 4.91  | 5.28  | 1.07 | 3.07 | 1.35 | 异常   | 脂肪肝声像       |
| 5.75  | 6.85  | 0.91 | 3.06 | 2.46 | 未见异常 |             |
| 5.42  | 3.33  | 2.33 | 1.33 | 1.28 | 未见异常 |             |
| 5.12  | 5.87  | 2.66 | 3.07 | 1.54 | 异常   | 轻度脂肪肝       |
| 5.02  | 6.85  | 1.26 | 3.91 | 1.76 | 未见异常 |             |
| 9.09  | 3.95  | 1.62 | 1.69 | 1.55 | 异常   | 腹部B超: 轻度脂肪肝 |
| 5.05  | 4.65  | 1.10 | 2.14 | 1.57 | 异常   | 胆囊结石; 脾大    |
| 5.10  | 5.23  | 2.47 | 2.71 | 1.30 | 异常   | 轻度脂肪肝声像     |
| 8.07  | 4.78  | 1.41 | 2.23 | 1.42 | 异常   | 肝囊肿         |
| 5.66  | 8.38  | 4.49 | 3.77 | 1.90 | 异常   | 1、轻度脂肪肝声像。  |
| 5.14  | 5.59  | 0.69 | 2.45 | 2.30 | 未见异常 |             |
| 8.24  | 3.98  | 0.65 | 2.27 | 1.15 | 未见异常 |             |
| 4.42  | 6.47  | 1.71 | 3.43 | 1.79 | 异常   | 肝囊肿         |
| 5.04  | 7.05  | 1.00 | 4.21 | 1.51 | 未见异常 |             |
| 10.26 | 4.96  | 0.65 | 2.81 | 1.47 | 未见异常 |             |
| 4.46  | 6.09  | 3.23 | 2.97 | 1.58 | 异常   | 轻度脂肪肝       |
| 4.34  | 5.36  | 1.95 | 2.98 | 1.43 | 异常   | 轻度脂肪肝声像     |
| 6.79  | 4.21  | 1.06 | 1.91 | 1.41 | 异常   | 1. 胆囊腔内强回声团 |
| 4.77  | 5.60  | 1.14 | 2.72 | 1.82 | 未见异常 |             |
| 4.58  | 10.60 | 5.39 | 4.31 | 1.86 | 异常   | 1、轻度脂肪肝声像2  |
| 5.25  | 5.87  | 1.64 | 2.76 | 1.92 | 未见异常 |             |
| 5.00  | 6.62  | 1.57 | 3.16 | 1.94 | 异常   | 轻度脂肪肝声像     |
| 4.91  | 4.25  | 1.09 | 2.30 | 1.02 | 未见异常 |             |
| 4.29  | 5.87  | 2.71 | 3.21 | 1.58 | 异常   | 脂肪肝声像       |
| 4.56  | 5.33  | 1.71 | 2.73 | 1.68 | 异常   | 轻度脂肪肝声像     |
| 4.58  | 6.81  | 1.43 | 3.66 | 1.84 | 未见异常 |             |
| 5.44  | 4.89  | 0.84 | 2.42 | 1.89 | 未见异常 |             |
| 5.81  | 5.80  | 1.72 | 3.19 | 1.70 | 异常   | 轻度脂肪肝声像     |
| 6.27  | 5.71  | 1.32 | 2.99 | 1.77 | 异常   | 脂肪肝声像; 胆汁粘  |
| 7.53  | 6.78  | 3.25 | 2.84 | 2.02 | 未见异常 |             |
| 5.53  | 5.13  | 2.60 | 2.90 | 1.32 | 未见异常 |             |
| 4.85  | 4.22  | 0.88 | 2.33 | 1.32 | 未见异常 |             |

|      |      |       |      |      |      |               |
|------|------|-------|------|------|------|---------------|
| 6.15 | 4.89 | 2.06  | 2.60 | 1.18 | 异常   | 肝囊肿           |
| 5.96 | 7.36 | 2.71  | 3.57 | 1.92 | 未见异常 |               |
| 7.87 | 5.65 | 2.33  | 3.11 | 1.29 | 异常   | 轻度脂肪肝         |
| 5.61 | 5.98 | 0.59  | 2.58 | 1.99 | 异常   | 肝内稍高回声结节，     |
| 5.09 | 5.45 | 3.78  | 2.60 | 1.39 | 异常   | 1. 脂肪肝声像；2. 肝 |
| 4.61 | 6.29 | 0.85  | 3.74 | 1.61 | 异常   | 胆囊内强回声(考虑     |
| 5.06 | 5.55 | 1.13  | 2.85 | 1.70 | 异常   | 1、轻度脂肪肝声像；    |
| 4.97 | 2.92 | 0.77  | 1.20 | 1.32 | 未见异常 |               |
| 5.14 | 4.68 | 1.00  | 2.29 | 1.62 | 异常   | 肝囊肿           |
| 4.72 | 6.81 | 1.23  | 2.85 | 2.32 | 异常   | 胆囊结石；         |
| 5.75 | 5.54 | 1.29  | 1.97 | 2.56 | 异常   | 胆囊内稍强回声团，     |
| 5.98 | 6.73 | 0.66  | 3.90 | 1.79 | 未见异常 |               |
| 5.25 | 5.86 | 1.35  | 2.54 | 2.25 | 未见异常 |               |
| 4.83 | 4.52 | 0.72  | 2.17 | 1.62 | 未见异常 |               |
| 5.64 | 7.10 | 1.66  | 4.21 | 1.64 | 异常   | 胆囊内强回声(考虑     |
| 5.13 | 6.65 | 4.39  | 3.21 | 1.57 | 异常   | 肝囊肿           |
| 8.83 | 3.89 | 0.86  | 1.74 | 1.47 | 异常   | 轻度脂肪肝声像       |
| 4.91 | 5.79 | 1.01  | 2.17 | 2.35 | 未见异常 |               |
| 4.85 | 5.20 | 1.65  | 2.74 | 1.32 | 异常   | 1. 脂肪肝声像2. 胆囊 |
| 4.32 | 5.18 | 2.30  | 2.44 | 1.64 | 未见异常 |               |
| 5.57 | 6.63 | 0.92  | 3.46 | 2.09 | 异常   | 轻度脂肪肝，肝囊息     |
| 5.02 | 5.13 | 0.86  | 2.82 | 1.57 | 异常   | 胆囊内强回声(未除)    |
| 5.65 | 7.59 | 1.13  | 4.33 | 1.83 | 异常   | 胆囊息肉样病变       |
| 4.92 | 8.08 | 1.04  | 4.56 | 2.05 | 未见异常 |               |
| 5.21 | 6.69 | 2.82  | 3.26 | 1.75 | 异常   | 轻度脂肪肝、肝囊肿     |
| 5.19 | 4.17 | 0.89  | 1.97 | 1.31 | 未见异常 |               |
| 7.04 | 8.36 | 17.14 | 1.68 | 1.11 | 异常   | 1、脂肪肝声像2、肝    |
| 5.35 | 3.76 | 2.80  | 1.76 | 1.21 | 未见异常 |               |
| 5.03 | 4.31 | 1.27  | 1.78 | 1.75 | 未见异常 |               |
| 4.42 | 8.23 | 1.00  | 4.57 | 2.13 | 异常   | 胆囊结石          |
| 4.74 | 5.92 | 1.48  | 3.45 | 1.45 | 异常   | 轻度脂肪肝声像       |
| 6.31 | 7.94 | 3.27  | 4.12 | 1.81 | 异常   | 脂肪肝声像         |
| 4.63 | 6.41 | 2.07  | 3.76 | 1.34 | 未见异常 |               |
| 4.76 | 6.89 | 0.52  | 3.41 | 2.34 | 异常   | 肝内强回声斑：考虑     |
| 5.45 | 6.20 | 1.79  | 3.50 | 1.55 | 异常   | 轻度脂肪肝声像；肝     |
| 6.90 | 5.49 | 0.92  | 3.00 | 1.64 | 未见异常 |               |
| 5.43 | 7.02 | 1.10  | 3.21 | 2.69 | 未见异常 |               |
| 5.27 | 5.92 | 0.82  | 2.85 | 1.82 | 异常   | 轻度脂肪肝声像       |
| 5.21 | 4.55 | 0.96  | 1.43 | 2.35 | 异常   | 胆囊息肉样变        |
| 5.20 | 4.05 | 0.79  | 2.00 | 1.54 |      |               |
| 5.32 | 5.46 | 6.00  | 1.84 | 1.26 | 异常   | 脂肪肝声像；肝内囊     |
| 4.39 | 5.39 | 1.49  | 2.43 | 1.80 | 异常   | 胆囊结石          |
| 4.89 | 5.88 | 1.85  | 3.11 | 1.74 | 异常   | 轻度脂肪肝；肝内强     |
| 5.55 | 5.73 | 0.94  | 2.98 | 1.68 | 异常   | 胆囊结石          |
| 5.13 | 5.82 | 4.69  | 2.71 | 1.18 | 未见异常 |               |
| 4.38 | 6.64 | 3.12  | 2.88 | 1.60 | 异常   | 轻度脂肪肝，肝囊息     |
| 4.78 | 5.36 | 1.34  | 2.71 | 1.47 |      |               |
| 6.41 | 5.20 | 0.78  | 2.63 | 1.53 | 异常   | 胆囊息肉样病变       |
| 5.50 | 4.34 | 2.27  | 2.18 | 1.14 | 异常   | 所属范围内轻度脂肪     |
| 6.58 | 5.46 | 1.24  | 2.47 | 1.93 | 未见异常 |               |
| 5.04 | 5.68 | 2.28  | 3.03 | 1.68 | 异常   | 轻度脂肪肝声像。      |

|       |      |       |      |      |      |              |
|-------|------|-------|------|------|------|--------------|
| 7.05  | 4.55 | 0.87  | 2.45 | 1.39 | 异常   | 轻度脂肪肝声像      |
| 5.18  | 6.25 | 1.23  | 2.92 | 2.21 | 异常   | 肝内囊性回声       |
| 5.23  | 6.79 | 1.24  | 3.69 | 1.78 | 异常   | 肝囊肿          |
| 4.12  | 5.84 | 1.33  | 3.15 | 1.49 | 异常   | 轻度脂肪肝        |
| 5.70  | 5.74 | 1.32  | 3.47 | 1.31 | 未见异常 |              |
| 5.56  | 6.16 | 2.09  | 3.24 | 1.53 | 未见异常 |              |
| 5.28  | 8.61 | 2.94  | 5.00 | 1.39 | 异常   | 轻度脂肪肝声像      |
| 4.61  | 3.26 | 0.77  | 1.26 | 1.50 |      |              |
| 5.17  | 6.50 | 1.10  | 3.71 | 1.48 | 异常   | 肝实质回声略增粗，    |
| 4.26  | 4.94 | 1.49  | 2.72 | 1.46 | 异常   | 1. 轻度脂肪肝声像2. |
| 5.23  | 6.69 | 1.31  | 3.97 | 1.79 | 未见异常 |              |
| 4.80  | 5.19 | 0.91  | 2.76 | 1.67 | 异常   | 轻度脂肪肝声像      |
| 4.30  | 5.32 | 1.11  | 2.94 | 1.40 | 异常   | 肝囊肿；胆囊息肉样    |
| 11.91 | 4.02 | 3.33  | 1.45 | 1.30 | 异常   | 1、轻度脂肪肝声像2   |
| 4.93  | 6.35 | 1.29  | 3.90 | 1.67 | 异常   | 轻度脂肪肝声像      |
| 6.54  | 5.28 | 2.15  | 2.47 | 1.69 | 未见异常 |              |
| 4.65  | 5.23 | 0.89  | 2.24 | 1.87 | 未见异常 |              |
| 3.18  | 5.89 | 5.28  | 2.40 | 1.28 | 异常   | 1、脂肪肝声像；2、   |
| 15.71 | 5.54 | 1.41  | 3.06 | 1.53 | 未见异常 |              |
| 7.83  | 5.62 | 3.92  | 2.73 | 1.61 | 异常   | 脂肪肝声像，肝囊肿    |
| 4.99  | 4.28 | 1.31  | 2.32 | 1.32 | 异常   | 脂肪肝声像        |
| 4.72  | 5.71 | 1.87  | 3.06 | 1.37 | 异常   | 胆囊结石         |
| 7.58  | 5.43 | 2.54  | 2.81 | 1.36 | 异常   | 1. 轻度脂肪肝声像 2 |
| 6.58  | 4.66 | 1.33  | 2.58 | 1.30 | 异常   | 轻度脂肪肝声像      |
| 6.44  | 5.33 | 4.23  | 2.63 | 1.35 | 异常   | 脂肪肝声像        |
| 5.18  | 4.56 | 1.34  | 1.93 | 1.92 | 未见异常 |              |
| 6.06  | 6.73 | 2.40  | 3.85 | 1.42 | 异常   | 脂肪肝声像        |
| 4.96  | 3.22 | 1.52  | 1.37 | 1.22 | 异常   | 肝右叶稍高回声结节    |
| 9.40  | 9.70 | 19.82 | 2.07 | 1.02 | 异常   | 轻度脂肪肝声像、胆    |
| 3.94  | 6.00 | 2.07  | 3.21 | 1.82 | 未见异常 |              |
| 5.62  | 5.67 | 1.41  | 3.05 | 1.48 | 异常   | 胆囊息肉样病变      |
| 5.63  | 8.15 | 1.20  | 3.67 | 2.65 | 未见异常 |              |
| 5.85  | 7.87 | 1.64  | 4.94 | 1.56 | 异常   | 轻度脂肪肝声像      |
| 5.81  | 3.74 | 2.46  | 1.60 | 1.32 | 未见异常 |              |
| 5.10  | 5.86 | 1.48  | 3.03 | 1.58 | 未见异常 |              |
| 4.63  | 6.67 | 3.82  | 3.11 | 1.70 | 异常   | 肝囊肿          |
| 4.86  | 6.06 | 1.22  | 3.01 | 2.04 | 异常   | 轻度脂肪肝声像      |
| 4.31  | 5.75 | 2.50  | 3.06 | 1.50 | 异常   | 轻度脂肪肝声像      |
| 5.80  | 4.00 | 1.34  | 1.94 | 1.38 | 未见异常 |              |
| 4.48  | 6.67 | 1.74  | 4.21 | 1.56 | 异常   | 1、脂肪肝声像；2、   |
| 5.80  | 5.30 | 1.79  | 3.00 | 1.15 | 异常   | 轻度脂肪肝声像      |
| 4.87  | 4.65 | 0.80  | 2.12 | 1.62 | 异常   | 胆总管稍扩张       |
| 5.28  | 5.12 | 2.03  | 2.91 | 1.23 | 未见异常 |              |
| 4.87  | 4.59 | 1.50  | 2.30 | 1.41 | 未见异常 |              |
| 5.35  | 6.76 | 1.14  | 4.23 | 1.67 | 异常   | 脂肪肝声像        |
| 5.60  | 6.55 | 1.50  | 3.35 | 1.97 | 异常   | 轻度脂肪肝        |
| 4.47  | 6.35 | 2.25  | 3.07 | 1.85 | 未见异常 |              |
| 4.35  | 5.14 | 1.91  | 2.48 | 1.49 | 未见异常 |              |
| 4.67  | 5.36 | 4.30  | 2.58 | 1.29 | 异常   | 脂肪肝声像        |
| 5.29  | 4.07 | 0.92  | 2.21 | 1.33 | 未见异常 |              |
| 4.86  | 5.42 | 1.07  | 3.03 | 1.66 | 异常   | 轻度脂肪肝声像      |

|       |       |      |      |      |                |
|-------|-------|------|------|------|----------------|
| 4.58  | 5.63  | 1.46 | 3.05 | 1.50 | 未见异常           |
| 4.94  | 6.14  | 4.77 | 2.85 | 1.23 | 未见异常           |
| 4.36  | 5.91  | 2.20 | 2.80 | 1.69 | 未见异常           |
| 4.71  | 5.57  | 0.97 | 2.27 | 2.11 | 异常 胆囊管扩张       |
| 5.13  | 5.56  | 1.37 | 2.92 | 1.50 | 未见异常           |
| 4.95  | 3.87  | 1.89 | 1.63 | 1.47 | 异常 脂肪肝声像       |
| 5.01  | 4.36  | 1.26 | 1.96 | 1.63 | 未见异常           |
| 4.96  | 7.02  | 1.63 | 3.79 | 1.69 | 异常 肝内囊性回声（考虑   |
| 5.15  | 5.26  | 2.56 | 2.57 | 1.33 | 未见异常           |
| 5.28  | 3.56  | 1.23 | 1.66 | 1.12 | 未见异常           |
| 4.69  | 6.93  | 1.24 | 3.25 | 2.32 | 未见异常           |
| 4.80  | 5.43  | 1.81 | 2.91 | 1.06 | 未见异常           |
| 5.35  | 8.06  | 0.84 | 4.87 | 2.23 | 未见异常           |
| 6.25  | 4.63  | 1.06 | 2.29 | 1.51 | 异常 轻度脂肪肝声像     |
| 5.57  | 6.38  | 1.06 | 2.50 | 2.31 | 未见异常           |
| 4.73  | 6.05  | 1.39 | 3.14 | 1.55 | 异常 轻度脂肪肝声像     |
| 5.44  | 5.13  | 1.97 | 2.73 | 1.47 | 异常 轻度脂肪肝声像     |
| 4.42  | 4.63  | 1.41 | 2.51 | 1.46 | 异常 1、肝囊肿。2、胆囊  |
| 6.05  | 7.58  | 1.41 | 3.89 | 2.20 | 异常 肝内小囊性回声（考   |
| 6.43  | 4.68  | 2.66 | 2.34 | 1.33 | 未见异常           |
| 4.62  | 4.59  | 1.32 | 1.87 | 1.91 | 异常 1、肝囊肿；2、胆囊  |
| 10.35 | 4.52  | 0.71 | 2.26 | 1.67 | 异常 肝胆胰彩超：脂肪肝   |
| 7.00  | 1.19  | 1.43 | 2.13 | 1.19 | 异常 脾大          |
| 5.17  | 7.21  | 1.44 | 3.54 | 2.25 | 异常 1.轻度脂肪肝声像 2 |
| 5.88  | 5.71  | 0.95 | 2.89 | 2.01 | 未见异常           |
| 5.45  | 6.58  | 1.41 | 3.43 | 1.77 | 异常 肝内强回声斑，考虑   |
| 4.97  | 2.63  | 0.94 | 1.07 | 1.09 | 异常 胆囊结石        |
| 5.19  | 6.99  | 1.91 | 3.74 | 1.65 | 异常 轻度脂肪肝       |
| 5.12  | 5.47  | 2.24 | 2.93 | 1.45 | 异常 轻度脂肪肝声像     |
| 6.76  | 4.28  | 1.31 | 2.21 | 1.58 | 未见异常           |
| 5.21  | 4.46  | 1.99 | 2.31 | 1.20 | 未见异常           |
| 5.38  | 6.19  | 1.91 | 3.46 | 1.39 | 未见异常           |
| 4.62  | 5.19  | 3.25 | 2.42 | 1.32 | 异常 脂肪肝声像，胆囊内   |
| 5.52  | 4.41  | 1.39 | 2.11 | 1.57 | 未见异常           |
| 4.90  | 6.31  | 1.52 | 3.48 | 1.56 | 未见异常           |
| 4.55  | 6.31  | 1.17 | 2.92 | 1.90 | 异常 腹部B超：肝囊肿    |
| 5.02  | 6.68  | 2.14 | 3.55 | 1.66 | 异常 轻度脂肪肝       |
| 4.90  | 6.56  | 0.97 | 3.96 | 1.60 | 异常 腹部B超：轻度脂肪肝  |
| 5.38  | 7.97  | 8.97 | 1.73 | 1.52 | 异常 胆囊内强回声      |
| 5.38  | 6.02  | 2.62 | 2.95 | 1.58 | 异常 肝胆脾胰B超：肝内引  |
| 11.94 | 5.62  | 1.22 | 3.12 | 1.63 | 异常 轻度脂肪肝声像     |
| 8.26  | 7.30  | 1.87 | 4.08 | 1.82 | 异常 肝囊肿         |
| 5.79  | 3.82  | 1.58 | 1.92 | 1.22 | 未见异常           |
| 4.11  | 5.04  | 0.64 | 2.17 | 1.97 | 未见异常           |
| 5.39  | 4.87  | 3.74 | 2.21 | 1.30 | 未见异常           |
| 4.99  | 6.60  | 1.51 | 3.81 | 1.69 | 未见异常           |
| 4.30  | 5.73  | 0.91 | 3.40 | 1.50 | 异常 肝内强回声斑（未除   |
| 5.36  | 49.00 | 2.00 | 2.90 | 1.68 | 异常 1.轻度脂肪肝2.胆囊 |
| 5.28  | 4.33  | 2.60 | 2.12 | 1.34 | 未见异常           |
| 4.36  | 4.43  | 5.02 | 1.75 | 1.20 | 未见异常           |
| 8.23  | 3.47  | 1.89 | 1.28 | 1.30 | 异常 轻度脂肪肝       |

|       |      |      |      |      |      |             |
|-------|------|------|------|------|------|-------------|
| 5.54  | 4.08 | 2.45 | 2.02 | 1.16 | 异常   | 肝右叶低回声区     |
| 5.87  | 8.06 | 1.76 | 4.85 | 1.72 | 异常   | 轻度脂肪肝声像     |
| 11.15 | 6.24 | 1.34 | 3.52 | 1.66 | 异常   | 1.轻度脂肪肝 2.脾 |
| 4.89  | 5.42 | 0.64 | 2.51 | 2.04 | 异常   | 考虑胆囊多发结石。   |
| 5.34  | 4.45 | 1.00 | 2.13 | 1.48 | 异常   | 脂肪肝，胆囊区强回   |
| 4.79  | 6.00 | 1.35 | 3.11 | 1.55 | 未见异常 |             |
| 7.32  | 4.49 | 2.39 | 2.13 | 1.44 | 未见异常 |             |
| 5.40  | 7.66 | 1.32 | 3.89 | 2.04 | 异常   | 肝内强回声斑：考虑   |
| 9.68  | 8.70 | 2.73 | 4.88 | 1.76 | 异常   | 脂肪肝声像       |
| 5.26  | 5.16 | 1.21 | 3.15 | 1.21 | 异常   | 轻度脂肪肝       |
| 6.45  | 6.15 | 2.96 | 3.16 | 1.84 | 异常   | 腹部B超：脂肪肝声像  |
| 6.26  | 6.08 | 2.69 | 3.13 | 1.47 | 异常   | 1.轻度脂肪肝声像2. |
| 5.49  | 4.73 | 1.38 | 2.15 | 1.59 | 异常   | 肝囊肿         |
| 4.92  | 5.02 | 1.13 | 2.28 | 1.88 | 未见异常 |             |
| 5.09  | 7.09 | 1.07 | 3.46 | 2.09 | 异常   | 腹部B超：肝多发囊肿  |
| 5.11  | 7.18 | 4.89 | 3.45 | 1.41 | 异常   | 轻度脂肪肝声像     |
| 4.61  | 6.32 | 2.09 | 3.55 | 1.74 | 未见异常 |             |
| 4.88  | 7.62 | 1.59 | 4.36 | 1.75 | 未见异常 |             |
| 4.84  | 5.98 | 1.35 | 3.16 | 1.80 | 未见异常 |             |
| 17.73 | 6.95 | 2.48 | 4.09 | 1.75 | 异常   | 脂肪肝声像。      |
| 4.63  | 5.79 | 1.02 | 3.25 | 1.71 | 异常   | 腹部B超：脂肪肝声像  |
| 6.79  | 8.09 | 2.93 | 4.71 | 1.80 | 异常   | 腹部B超：脂肪肝声像  |
| 4.60  | 6.24 | 1.77 | 3.49 | 1.42 | 异常   | 胆囊多发结石      |
| 6.93  | 6.24 | 0.89 | 3.74 | 1.45 | 异常   | 胆囊壁稍毛糙      |
| 6.24  | 5.28 | 0.86 | 3.00 | 1.69 | 异常   | 胆囊息肉样病变     |
| 5.71  | 7.15 | 1.64 | 4.04 | 1.82 | 未见异常 |             |
| 6.40  | 6.17 | 1.52 | 3.40 | 1.79 | 未见异常 |             |
| 7.44  | 6.30 | 1.58 | 3.52 | 1.68 | 异常   | 脂肪肝声像       |
| 5.89  | 5.09 | 3.70 | 2.42 | 1.27 | 异常   | 轻度脂肪肝声像     |
| 4.76  | 5.28 | 0.73 | 1.65 | 2.78 | 异常   | 胆囊结石        |
| 5.15  | 4.84 | 1.17 | 2.82 | 1.17 | 未见异常 |             |
| 5.02  | 7.17 | 1.25 | 4.74 | 1.45 | 异常   | 1.脂肪肝声像 2.肝 |
| 4.19  | 4.42 | 1.51 | 2.08 | 1.38 | 未见异常 |             |
| 5.05  | 6.07 | 1.16 | 2.50 | 2.07 | 未见异常 |             |
| 4.93  | 5.41 | 1.47 | 3.01 | 1.38 | 异常   | 脂肪肝声像       |
| 5.88  | 4.68 | 1.54 | 2.45 | 1.15 | 未见异常 |             |
| 4.44  | 4.27 | 1.50 | 2.25 | 1.25 | 未见异常 |             |
| 6.23  | 4.60 | 0.70 | 1.84 | 1.90 | 未见异常 |             |
| 4.67  | 5.44 | 2.26 | 2.98 | 1.27 | 异常   | 脂肪肝声像       |
| 4.94  | 5.38 | 1.38 | 2.87 | 1.68 | 异常   | 1,肝囊肿,2肝内强  |
| 5.96  | 7.30 | 3.23 | 4.23 | 1.57 | 异常   | 脂肪肝声像       |
| 5.07  | 5.73 | 1.66 | 3.13 | 1.29 | 异常   | 轻度脂肪肝声像     |
| 5.52  | 5.34 | 1.17 | 2.47 | 1.86 | 未见异常 |             |
| 6.07  | 7.08 | 2.13 | 3.93 | 1.75 | 未见异常 |             |
| 4.45  | 6.24 | 5.43 | 2.45 | 1.38 | 异常   | 轻度脂肪肝声像     |
| 4.60  | 5.36 | 2.06 | 2.87 | 1.37 | 未见异常 |             |
| 7.36  | 4.42 | 1.08 | 2.33 | 1.42 | 异常   | 胆囊结石        |
| 5.24  | 4.69 | 2.36 | 2.29 | 1.58 | 未见异常 |             |
| 7.31  | 7.43 | 4.30 | 3.72 | 1.90 | 异常   | 轻度脂肪肝声像     |
| 4.25  | 4.36 | 0.71 | 2.04 | 1.78 | 异常   | 1、肝多发囊肿；2、  |
| 5.56  | 5.48 | 1.99 | 2.92 | 1.44 | 异常   | 轻度脂肪肝       |

|      |      |      |      |      |      |             |
|------|------|------|------|------|------|-------------|
| 5.36 | 5.91 | 3.18 | 3.02 | 1.48 | 异常   | 胆囊结石；轻度脂肪   |
| 4.95 | 5.23 | 2.15 | 2.55 | 1.45 | 异常   | 胆囊壁稍强光点     |
| 4.59 | 6.37 | 1.26 | 3.82 | 1.32 | 异常   | 轻度脂肪肝声像     |
| 6.16 | 6.85 | 1.85 | 3.95 | 1.58 | 异常   | 胆囊息肉样病变     |
| 5.21 | 5.64 | 1.25 | 2.97 | 1.49 | 未见异常 |             |
| 5.17 | 4.40 | 0.77 | 1.88 | 1.78 | 未见异常 |             |
| 4.74 | 5.99 | 2.31 | 3.00 | 1.73 | 异常   | 脂肪肝声像       |
| 5.76 | 6.84 | 2.90 | 3.27 | 1.82 | 未见异常 |             |
| 5.29 | 6.23 | 0.92 | 2.77 | 2.26 | 异常   | 肝内强回声斑：考虑   |
| 4.75 | 5.12 | 2.51 | 2.79 | 1.47 | 异常   | 1、脂肪肝声像；2、  |
| 7.04 | 8.23 | 8.06 | 2.25 | 1.66 | 未见异常 |             |
| 5.31 | 6.26 | 1.88 | 3.59 | 1.62 | 异常   | 1、脂肪肝声像；2、  |
| 6.37 | 7.08 | 2.22 | 3.69 | 1.65 | 异常   | 肝小囊肿        |
| 4.71 | 4.47 | 1.29 | 2.21 | 1.62 | 未见异常 |             |
| 4.89 | 5.27 | 0.92 | 2.22 | 2.09 | 未见异常 |             |
| 5.67 | 8.78 | 3.82 | 4.76 | 1.68 | 异常   | 轻度脂肪肝声像     |
| 7.49 | 5.91 | 1.12 | 3.55 | 1.36 | 未见异常 |             |
| 4.85 | 3.81 | 2.08 | 1.72 | 1.26 | 未见异常 |             |
| 4.91 | 5.09 | 1.48 | 2.73 | 1.62 | 异常   | 胆囊内强回声      |
| 5.36 | 6.71 | 0.78 | 3.32 | 2.27 | 未见异常 |             |
| 5.54 | 6.91 | 1.24 | 3.44 | 2.04 | 未见异常 |             |
| 5.19 | 6.45 | 2.47 | 3.68 | 1.59 | 未见异常 |             |
| 4.67 | 4.48 | 1.37 | 2.00 | 1.59 | 未见异常 |             |
| 6.48 | 5.28 | 4.81 | 2.07 | 1.39 | 异常   | 轻度脂肪肝       |
| 4.51 | 5.08 | 2.44 | 2.35 | 1.70 | 异常   | 轻度脂肪肝声像，胆   |
| 5.07 | 8.68 | 1.28 | 4.37 | 2.31 | 未见异常 |             |
| 4.59 | 5.47 | 1.44 | 3.46 | 1.36 | 异常   | 脂肪肝声像       |
| 5.31 | 6.53 | 1.42 | 3.14 | 2.25 | 未见异常 |             |
| 5.81 | 6.36 | 1.66 | 3.30 | 2.01 | 异常   | 胆囊强回声团，结石   |
| 4.25 | 4.61 | 0.80 | 1.61 | 2.24 | 未见异常 |             |
| 4.52 | 4.18 | 1.98 | 1.92 | 1.39 | 未见异常 |             |
| 4.23 | 5.35 | 0.95 | 3.13 | 1.53 | 未见异常 |             |
| 6.60 | 3.63 | 1.53 | 1.82 | 1.27 | 未见异常 |             |
| 5.51 | 4.95 | 1.08 | 2.22 | 1.87 | 未见异常 |             |
| 4.60 | 5.68 | 2.81 | 2.86 | 1.61 | 未见异常 |             |
| 6.60 | 5.46 | 1.46 | 3.01 | 1.49 | 未见异常 |             |
| 4.90 | 7.70 | 2.46 | 4.23 | 2.12 | 异常   | 腹部B超：肝囊肿    |
| 5.03 | 5.37 | 0.90 | 2.83 | 1.78 | 未见异常 |             |
| 4.92 | 4.51 | 1.58 | 2.04 | 1.39 | 未见异常 |             |
| 4.79 | 1.06 | 3.96 | 1.74 | 1.54 | 未见异常 |             |
| 6.47 | 5.75 | 1.69 | 3.36 | 1.31 | 异常   | 肝囊肿         |
| 5.29 | 7.26 | 3.09 | 3.92 | 1.65 | 异常   | 腹部B超：轻度脂肪肝  |
| 8.07 | 5.67 | 1.70 | 3.12 | 1.48 | 异常   | 脂肪肝声像       |
| 6.52 | 6.23 | 1.64 | 3.67 | 1.58 | 未见异常 |             |
| 4.57 | 5.89 | 2.48 | 3.08 | 1.29 | 未见异常 |             |
| 5.86 | 4.26 | 1.58 | 2.10 | 1.51 | 异常   | 脂肪肝声像       |
| 6.46 | 5.33 | 0.56 | 2.61 | 1.84 | 未见异常 |             |
| 6.39 | 6.19 | 1.72 | 3.13 | 1.98 | 未见异常 |             |
| 5.26 | 4.97 | 2.09 | 2.57 | 1.56 | 异常   | 1、脂肪肝声像 2、肝 |
| 7.43 | 5.43 | 1.68 | 2.77 | 1.73 | 异常   | 脂肪肝声像       |
| 6.22 | 4.62 | 2.54 | 2.21 | 1.31 | 异常   | 胆囊切除术后声像改   |

|       |      |      |      |      |      |            |
|-------|------|------|------|------|------|------------|
| 4.33  | 6.23 | 0.85 | 2.40 | 2.24 | 异常   | 胆囊结石       |
| 4.80  | 5.23 | 0.75 | 2.80 | 1.61 | 异常   | 腹部B超：1.脂肪肝 |
| 4.62  | 4.19 | 0.47 | 1.55 | 1.97 | 未见异常 |            |
| 6.14  | 6.98 | 1.92 | 3.75 | 1.99 | 未见异常 |            |
| 6.21  | 5.79 | 0.74 | 2.99 | 1.99 | 异常   | 1、胆囊壁多发稍强  |
| 4.74  | 6.05 | 1.18 | 3.35 | 1.85 | 未见异常 |            |
| 5.05  | 5.75 | 1.42 | 3.32 | 1.44 | 未见异常 |            |
| 5.17  | 5.89 | 1.44 | 3.15 | 1.67 | 异常   | 腹部B超：1、脂肪肝 |
| 5.48  | 5.42 | 1.39 | 2.98 | 1.54 | 未见异常 |            |
| 4.93  | 6.52 | 2.21 | 3.84 | 1.36 | 异常   | 腹部B超：1.脂肪肝 |
| 5.51  | 5.85 | 1.92 | 3.46 | 1.44 | 异常   | 轻度脂肪肝声像。   |
| 5.38  | 4.69 | 1.40 | 2.56 | 1.44 | 异常   | 轻度脂肪肝声像    |
| 4.63  | 7.39 | 1.44 | 3.95 | 2.03 | 未见异常 |            |
| 4.51  | 6.36 | 2.82 | 2.96 | 1.72 | 未见异常 |            |
| 9.70  | 6.06 | 0.83 | 2.97 | 1.92 | 异常   | 肝胆脾胰B超：轻度肝 |
| 4.96  | 5.67 | 2.06 | 2.97 | 1.44 | 异常   | 肝胆脾胰B超：轻度肝 |
| 5.59  | 6.94 | 5.22 | 2.73 | 1.45 | 异常   | 肝囊肿        |
| 4.26  | 7.42 | 1.97 | 4.44 | 1.62 | 未见异常 |            |
| 4.12  | 6.01 | 0.70 | 3.14 | 1.98 | 异常   | 肝囊肿        |
| 4.21  | 6.79 | 2.21 | 3.92 | 1.59 | 未见异常 |            |
| 5.08  | 5.98 | 0.77 | 2.45 | 2.21 | 异常   | 胆囊结石       |
| 5.21  | 5.85 | 1.75 | 3.16 | 1.36 | 异常   | 肝右叶低回声结节，  |
| 5.47  | 7.49 | 1.60 | 3.61 | 2.08 | 未见异常 |            |
| 4.11  | 4.18 | 1.43 | 1.89 | 1.41 | 异常   | 胆囊稍增大，胆囊结  |
| 7.82  | 4.62 | 1.97 | 2.51 | 1.21 | 异常   | 脂肪肝声像      |
| 4.51  | 6.15 | 1.28 | 3.41 | 1.80 | 未见异常 |            |
| 6.57  | 5.34 | 0.96 | 3.01 | 1.52 | 未见异常 |            |
| 4.23  | 5.75 | 1.91 | 3.32 | 1.26 | 异常   | 1、轻度脂肪肝声像  |
| 5.82  | 5.91 | 1.98 | 3.20 | 1.29 | 异常   | 1、脂肪肝声像，2、 |
| 5.26  | 5.82 | 1.61 | 3.10 | 1.46 | 未见异常 |            |
| 7.85  | 7.05 | 1.32 | 4.04 | 2.13 | 异常   | 轻度脂肪肝      |
| 4.97  | 5.55 | 2.34 | 2.70 | 1.33 | 异常   | 肝囊肿        |
| 4.47  | 6.56 | 1.86 | 3.79 | 1.66 | 异常   | 脂肪肝声像 胆囊内引 |
| 3.98  | 4.63 | 2.71 | 2.36 | 1.06 | 未见异常 |            |
| 4.57  | 6.06 | 1.67 | 3.13 | 1.85 | 异常   | 肝小囊肿；肝内强回  |
| 5.80  | 5.82 | 1.09 | 3.26 | 1.71 | 异常   | 1肝实质回声增粗；2 |
| 6.10  | 7.68 | 1.41 | 4.71 | 1.73 | 异常   | 轻度脂肪肝声像。   |
| 6.39  | 5.34 | 2.66 | 2.72 | 1.34 | 异常   | 脂肪肝声像；肝内囊  |
| 10.54 | 7.25 | 2.44 | 4.00 | 1.84 | 未见异常 |            |
| 5.06  | 6.31 | 1.87 | 3.67 | 1.33 | 未见异常 |            |
| 5.09  | 5.98 | 2.74 | 3.31 | 1.45 | 异常   | 轻度脂肪肝声像    |
| 4.46  | 7.70 | 2.76 | 5.09 | 1.52 | 未见异常 |            |
| 4.71  | 6.22 | 4.50 | 2.81 | 1.38 | 异常   | 轻度脂肪肝声像    |
| 5.28  | 5.41 | 1.71 | 2.91 | 1.42 | 异常   | 脂肪肝声像      |
| 4.40  | 6.83 | 1.35 | 3.69 | 2.06 | 异常   | 1肝囊肿声像2脂肪肝 |
| 4.15  | 6.09 | 2.18 | 3.27 | 1.74 | 异常   | 1脂肪肝声像2肝左叶 |
| 5.06  | 5.63 | 2.08 | 3.06 | 1.45 | 异常   | 肝内强回声斑：考虑  |
| 5.72  | 5.06 | 2.95 | 2.64 | 1.26 | 未见异常 |            |
| 5.79  | 5.13 | 0.93 | 2.15 | 1.97 | 异常   | 胆囊结石       |
| 6.84  | 4.59 | 1.07 | 2.84 | 1.03 | 未见异常 |            |
| 5.77  | 5.98 | 2.23 | 2.81 | 1.55 | 未见异常 |            |

|       |      |      |      |      |                |
|-------|------|------|------|------|----------------|
| 5.54  | 5.07 | 1.24 | 2.91 | 1.31 | 未见异常           |
| 6.10  | 6.35 | 1.28 | 3.77 | 1.55 | 异常 脂肪肝声像       |
| 5.92  | 5.84 | 0.78 | 3.03 | 1.69 | 异常 腹部B超：轻度脂肪肝  |
| 5.30  | 5.87 | 1.89 | 3.13 | 1.53 | 异常 轻度脂肪肝声像     |
| 19.43 | 7.04 | 0.94 | 3.52 | 1.94 | 未见异常           |
| 5.53  | 4.28 | 1.69 | 2.09 | 1.42 | 未见异常           |
| 4.92  | 5.41 | 2.53 | 2.72 | 1.42 | 异常 肝内强回声斑      |
| 4.34  | 4.93 | 0.95 | 1.59 | 2.35 | 异常 腹部B超：胆囊结石   |
| 6.99  | 6.69 | 1.44 | 3.16 | 1.96 | 异常 胆偏大声像       |
| 6.37  | 4.21 | 5.82 | 2.11 | 1.45 | 异常 1、脂肪肝声像；2、  |
| 4.46  | 5.05 | 0.63 | 2.66 | 1.51 | 未见异常           |
| 5.16  | 7.52 | 1.59 | 3.89 | 2.05 | 未见异常           |
| 5.09  | 3.89 | 1.21 | 1.66 | 1.37 | 未见异常           |
| 4.51  | 7.20 | 2.79 | 3.72 | 1.66 | 异常 1、脂肪肝声像； 2、 |
| 6.91  | 4.75 | 2.84 | 2.19 | 1.45 | 异常 轻度脂肪肝声像     |
| 5.29  | 4.85 | 1.28 | 2.68 | 1.39 | 未见异常           |
| 4.88  | 4.81 | 0.79 | 2.39 | 1.53 | 未见异常           |
| 4.67  | 6.91 | 0.68 | 3.66 | 2.44 | 未见异常           |
| 4.97  | 6.14 | 5.51 | 2.29 | 1.38 | 异常 1.脂肪肝声像 2.肝 |
| 7.36  | 4.95 | 1.88 | 2.88 | 1.45 |                |
| 6.33  | 6.50 | 2.03 | 3.56 | 1.60 | 异常 轻度脂肪肝       |
| 8.78  | 5.09 | 2.85 | 2.60 | 1.46 | 异常 脂肪肝声像       |
| 5.04  | 6.81 | 2.09 | 3.77 | 1.71 | 异常 轻度脂肪肝声像     |
| 4.36  | 5.81 | 2.01 | 2.64 | 2.19 | 未见异常           |
| 5.17  | 9.31 | 1.66 | 4.12 | 2.97 | 未见异常           |
| 5.47  | 7.90 | 1.77 | 4.38 | 2.11 | 异常 轻度脂肪肝声像     |
| 5.82  | 7.05 | 2.31 | 3.75 | 1.70 | 未见异常           |
| 7.28  | 5.28 | 0.64 | 2.62 | 1.79 | 异常 肝囊肿         |
| 5.79  | 5.74 | 1.29 | 2.96 | 1.67 | 未见异常           |
| 7.06  | 5.59 | 2.36 | 2.76 | 1.45 | 异常 脂肪肝声像，肝内强   |
| 5.97  | 6.30 | 1.46 | 4.08 | 1.03 | 未见异常           |
| 4.87  | 6.05 | 1.20 | 2.97 | 2.01 | 未见异常           |
| 5.07  | 5.98 | 4.48 | 2.42 | 1.63 | 异常 脂肪肝声像       |
| 5.70  | 6.10 | 1.37 | 3.58 | 1.59 | 未见异常           |
| 7.92  | 6.95 | 2.17 | 3.60 | 1.80 | 异常 轻度脂肪肝声像     |
| 5.41  | 4.76 | 2.09 | 2.47 | 1.24 | 异常 轻度脂肪肝声像；    |
| 5.09  | 5.12 | 3.28 | 2.53 | 1.44 | 异常 胆囊息肉样病变。    |
| 5.72  | 8.70 | 1.48 | 4.92 | 1.98 | 未见异常           |
| 5.06  | 6.59 | 1.30 | 3.05 | 2.42 | 异常 胆囊息肉样病变     |
| 4.85  | 6.81 | 3.13 | 3.46 | 1.91 | 异常 肝内低回声结节     |
| 4.70  | 4.04 | 0.96 | 2.12 | 1.44 | 异常 肝胆胰彩超：肝囊肿   |
| 5.17  | 6.15 | 1.11 | 3.46 | 1.88 | 未见异常           |
| 7.60  | 5.81 | 1.81 | 3.41 | 1.46 | 未见异常           |
| 10.60 | 3.74 | 2.52 | 1.50 | 1.39 | 异常 轻度脂肪肝声像     |
| 6.55  | 6.24 | 2.24 | 3.03 | 1.71 | 异常 轻度脂肪肝声像     |
| 4.47  | 5.65 | 0.96 | 2.86 | 1.74 | 异常 肝囊肿         |
| 4.74  | 5.37 | 1.71 | 2.72 | 1.72 | 异常 胆囊结石        |
| 4.72  | 5.47 | 2.29 | 2.29 | 1.51 | 未见异常           |
| 4.66  | 4.68 | 2.50 | 2.39 | 1.23 | 异常 轻度脂肪肝声像，肝   |
| 4.15  | 7.05 | 2.35 | 4.00 | 1.55 | 异常 轻度脂肪肝       |
| 5.53  | 5.26 | 1.39 | 2.78 | 1.50 | 未见异常           |

|       |       |      |      |      |      |               |
|-------|-------|------|------|------|------|---------------|
| 5.37  | 4.26  | 0.82 | 2.05 | 1.59 | 未见异常 |               |
| 4.74  | 7.18  | 2.01 | 3.87 | 1.69 | 异常   | 肝内强回声斑:考虑     |
| 4.74  | 6.08  | 1.71 | 3.31 | 1.67 | 未见异常 |               |
| 5.04  | 3.96  | 1.20 | 1.76 | 1.44 | 未见异常 |               |
| 5.27  | 5.59  | 6.80 | 2.72 | 1.54 | 异常   | 轻度脂肪肝         |
| 5.65  | 6.83  | 1.58 | 3.55 | 1.70 |      |               |
| 9.01  | 7.86  | 1.62 | 4.43 | 1.91 | 未见异常 |               |
| 7.77  | 5.74  | 4.35 | 2.43 | 1.37 |      |               |
| 4.34  | 6.04  | 1.50 | 3.35 | 1.57 | 未见异常 |               |
| 5.31  | 4.59  | 1.27 | 2.35 | 1.58 | 未见异常 |               |
| 6.78  | 3.34  | 0.70 | 1.29 | 1.52 | 未见异常 |               |
| 6.96  | 5.80  | 1.74 | 2.74 | 1.78 | 异常   | 肝囊肿           |
| 7.22  | 6.57  | 2.62 | 3.57 | 1.76 | 未见异常 |               |
| 4.75  | 6.74  | 1.05 | 3.45 | 1.91 | 异常   | 1. 肝内囊性回声2. 肝 |
| 4.45  | 4.84  | 0.91 | 1.91 | 2.03 | 未见异常 |               |
| 4.88  | 5.19  | 0.98 | 2.88 | 1.47 | 未见异常 |               |
| 4.43  | 4.57  | 3.51 | 1.92 | 1.32 | 未见异常 |               |
| 5.47  | 4.52  | 1.64 | 2.15 | 1.41 | 未见异常 |               |
| 4.95  | 10.35 | 1.90 | 6.10 | 2.00 | 未见异常 |               |
| 7.61  | 5.09  | 2.05 | 2.74 | 1.19 | 异常   | 1、脂肪肝声像; 2、   |
| 3.87  | 4.78  | 1.22 | 2.37 | 1.22 | 未见异常 |               |
| 6.36  | 6.33  | 2.27 | 3.30 | 1.46 | 未见异常 |               |
| 5.63  | 5.42  | 1.04 | 2.54 | 1.74 | 未见异常 |               |
| 5.09  | 6.43  | 4.26 | 2.83 | 1.50 | 未见异常 |               |
| 5.04  | 7.91  | 0.99 | 3.70 | 2.45 | 异常   | 肝内强回声斑: 考虑    |
| 6.91  | 4.55  | 3.63 | 2.05 | 1.21 | 异常   | 轻度脂肪肝声像, 胆    |
| 4.86  | 4.66  | 0.81 | 1.90 | 1.71 | 异常   | 肝胆脾胰B超: 肝内引   |
| 5.01  | 6.13  | 2.74 | 3.08 | 1.33 | 异常   | 肝囊肿           |
| 6.17  | 4.49  | 2.28 | 2.03 | 1.34 | 异常   | 胆囊息肉样病变       |
| 10.39 | 6.62  | 1.96 | 4.16 | 1.41 | 异常   | 轻度脂肪肝声像       |
| 4.54  | 6.04  | 2.47 | 2.99 | 1.79 | 未见异常 |               |
| 5.35  | 6.43  | 1.74 | 2.69 | 2.41 | 未见异常 |               |
| 4.72  | 4.95  | 2.07 | 2.57 | 1.27 | 未见异常 |               |
| 5.68  | 5.60  | 1.77 | 2.11 | 2.46 | 异常   | 轻度脂肪肝         |
| 4.43  | 4.82  | 0.74 | 2.69 | 1.20 | 异常   | 胆囊未探及 胆总管     |
| 3.85  | 7.27  | 2.87 | 4.04 | 1.55 | 异常   | 轻度脂肪肝         |
| 4.94  | 5.95  | 0.78 | 2.75 | 1.94 | 未见异常 |               |
| 13.24 | 7.43  | 2.95 | 3.96 | 1.74 | 异常   | 轻度脂肪肝         |
| 4.97  | 5.01  | 1.04 | 2.49 | 1.65 | 未见异常 |               |
| 4.99  | 3.83  | 2.19 | 1.92 | 1.03 | 未见异常 |               |
| 5.23  | 5.62  | 1.31 | 2.87 | 1.77 | 未见异常 |               |
| 5.81  | 5.25  | 1.32 | 2.59 | 1.87 | 未见异常 |               |
| 5.00  | 5.32  | 1.78 | 2.81 | 1.51 | 异常   | 肝多发囊性回声(考     |
| 5.08  | 5.17  | 4.74 | 1.95 | 1.55 | 异常   | 脂肪肝声像         |
| 5.65  | 4.20  | 1.60 | 2.20 | 1.09 | 异常   | 脂肪肝声像         |
| 7.44  | 9.35  | 1.85 | 6.10 | 1.49 | 异常   | 肝内强回声: 钙化灶    |
| 4.94  | 5.42  | 1.55 | 2.94 | 1.48 | 异常   | 轻度脂肪肝声像       |
| 4.68  | 5.30  | 1.23 | 2.93 | 1.39 | 未见异常 |               |
| 4.66  | 8.14  | 3.73 | 4.22 | 1.42 | 异常   | 肝脾内脏转位        |
| 6.02  | 4.98  | 1.13 | 2.99 | 1.38 | 未见异常 |               |
| 6.35  | 5.64  | 1.18 | 3.34 | 1.61 | 异常   | 肝脏实质回声增粗、     |

|       |      |      |      |      |      |               |
|-------|------|------|------|------|------|---------------|
| 4.87  | 5.16 | 0.68 | 2.64 | 1.65 | 异常   | 轻度脂肪肝声像       |
| 5.55  | 6.41 | 1.72 | 3.39 | 1.86 | 异常   | 脂肪肝声像         |
| 5.22  | 6.72 | 2.11 | 3.55 | 1.90 |      |               |
| 4.18  | 5.33 | 5.02 | 2.13 | 1.31 | 未见异常 |               |
| 4.79  | 4.81 | 1.65 | 2.36 | 1.69 | 未见异常 |               |
| 7.06  | 7.22 | 3.17 | 3.98 | 1.41 | 异常   | 脂肪肝声像         |
| 4.97  | 5.72 | 0.81 | 2.81 | 1.81 | 未见异常 |               |
| 5.04  | 5.44 | 0.92 | 1.47 | 2.79 | 异常   | 脂肪肝声像         |
| 4.83  | 4.61 | 3.79 | 1.64 | 1.35 | 异常   | 胆囊多发性结石       |
| 5.56  | 5.89 | 1.17 | 3.62 | 1.58 | 异常   | 轻度脂肪肝声像       |
| 8.70  | 6.19 | 0.79 | 3.60 | 1.80 | 未见异常 |               |
| 5.85  | 7.66 | 2.13 | 4.20 | 1.86 | 未见异常 |               |
| 5.06  | 7.14 | 1.18 | 4.36 | 1.81 | 异常   | 肝囊肿           |
| 18.94 | 7.33 | 1.90 | 4.25 | 1.83 | 异常   | 脂肪肝声像         |
| 5.72  | 7.99 | 2.48 | 4.33 | 1.79 | 未见异常 |               |
| 5.74  | 6.34 | 0.73 | 2.99 | 2.05 | 异常   | 肝囊肿           |
| 5.64  | 7.13 | 2.98 | 3.75 | 1.52 | 异常   | 左心房心律?        |
| 4.76  | 5.13 | 0.94 | 2.54 | 1.93 | 异常   | 肝实质回声稍粗       |
| 6.97  | 5.72 | 2.62 | 3.34 | 1.36 |      |               |
| 4.11  | 5.44 | 0.64 | 2.41 | 2.00 | 异常   | 胆囊强回声团, 考虑    |
| 5.31  | 7.34 | 1.27 | 4.44 | 1.65 | 未见异常 |               |
| 4.67  | 4.63 | 1.95 | 2.19 | 1.09 | 异常   | 肝胆脾胰B超: 1. 轻度 |
| 9.15  | 7.59 | 7.86 | 3.97 | 1.45 | 未见异常 |               |
| 5.40  | 4.24 | 1.07 | 2.03 | 1.30 | 异常   | 1、轻度脂肪肝声像;    |
| 4.92  | 5.79 | 1.45 | 3.11 | 1.38 | 异常   | 脂肪肝声像         |
| 4.39  | 5.07 | 4.05 | 2.32 | 1.34 | 异常   | 脂肪肝声像         |
| 5.63  | 7.15 | 2.22 | 4.34 | 1.48 | 异常   | 轻度脂肪肝         |
| 4.36  | 6.21 | 1.02 | 3.24 | 1.84 | 未见异常 |               |
| 4.91  | 6.68 | 2.72 | 3.57 | 1.83 | 异常   | 轻度脂肪肝声像       |
| 6.65  | 5.77 | 5.13 | 1.93 | 1.62 | 异常   | 轻度脂肪肝声像       |
| 9.46  | 4.66 | 1.43 | 2.23 | 1.57 | 未见异常 |               |
| 5.26  | 5.67 | 1.09 | 2.60 | 2.15 | 异常   | 胆囊息肉样病变       |
| 5.16  | 4.14 | 1.47 | 2.01 | 1.35 | 未见异常 |               |
| 6.84  | 7.91 | 1.13 | 4.37 | 1.81 | 未见异常 |               |
| 5.26  | 3.03 | 0.87 | 1.41 | 1.21 | 异常   | 胆囊强回声团, 考虑    |
| 6.03  | 6.51 | 1.77 | 3.26 | 1.53 | 未见异常 |               |
| 4.03  | 6.42 | 2.08 | 3.28 | 1.59 | 未见异常 |               |
| 5.22  | 5.35 | 1.35 | 2.44 | 1.79 | 未见异常 |               |
| 5.40  | 6.43 | 1.97 | 3.22 | 1.61 | 未见异常 |               |
| 5.24  | 6.02 | 5.21 | 2.43 | 1.48 | 异常   | 1脂肪肝声像。2胆囊    |
| 4.52  | 6.10 | 2.33 | 3.35 | 1.40 | 异常   | 轻度脂肪肝声像       |
| 6.53  | 6.06 | 4.00 | 2.82 | 1.53 | 异常   | 肝多发囊肿         |
| 5.54  | 5.57 | 0.91 | 2.83 | 1.81 | 异常   | 肝内强回声斑(考虑     |
| 5.94  | 3.91 | 1.01 | 1.30 | 1.86 | 未见异常 |               |
| 5.22  | 5.91 | 0.99 | 3.23 | 1.63 | 未见异常 |               |
| 5.03  | 5.94 | 0.91 | 3.32 | 1.78 | 异常   | 脂肪肝声像         |
| 5.05  | 5.70 | 0.99 | 2.97 | 1.54 | 异常   | 肝小囊肿          |
| 5.09  | 7.56 | 3.21 | 4.04 | 1.78 | 未见异常 |               |
| 4.92  | 5.79 | 0.72 | 2.61 | 1.76 | 未见异常 |               |
| 5.38  | 6.11 | 1.51 | 3.42 | 1.77 | 异常   | 肝右叶稍高回声结节     |
| 9.12  | 7.08 | 2.71 | 3.88 | 1.67 | 异常   | 1、脂肪肝声像; 2、   |

|       |       |       |      |      |                 |
|-------|-------|-------|------|------|-----------------|
| 5.00  | 7.27  | 1.61  | 4.38 | 1.42 | 未见异常            |
| 4.51  | 5.50  | 1.62  | 2.95 | 1.70 |                 |
| 6.21  | 7.23  | 8.67  | 1.68 | 1.21 | 异常 轻度脂肪肝声像      |
| 6.84  | 6.30  | 4.76  | 2.69 | 1.67 | 异常 胆总管稍扩张, 结合   |
| 4.59  | 4.09  | 1.18  | 2.29 | 1.23 | 未见异常            |
| 7.85  | 4.95  | 0.95  | 3.09 | 1.36 | 异常 1、脂肪肝声像2、胆   |
| 4.43  | 3.90  | 1.05  | 1.42 | 1.84 |                 |
| 5.28  | 5.56  | 3.18  | 2.92 | 1.43 | 未见异常            |
| 6.45  | 10.13 | 3.53  | 5.52 | 1.55 | 异常 轻度脂肪肝声像      |
| 10.91 | 6.06  | 1.84  | 3.48 | 1.45 | 异常 腹部B超: 1.轻度脂肪 |
| 3.95  | 7.44  | 2.19  | 4.11 | 1.97 | 未见异常            |
| 6.64  | 1.31  | 5.36  | 2.56 | 1.75 | 异常 轻度脂肪肝声像      |
| 8.12  | 3.31  | 1.69  | 1.43 | 1.14 | 异常 1轻度脂肪肝声像 2   |
| 5.42  | 6.13  | 1.23  | 3.97 | 1.28 | 异常 胆囊息肉样病变      |
| 4.79  | 8.24  | 1.57  | 4.79 | 1.76 | 未见异常            |
| 4.87  | 6.65  | 1.50  | 3.11 | 2.17 | 异常 肝囊肿; 脂肪肝     |
| 4.66  | 5.43  | 1.13  | 2.95 | 1.51 | 未见异常            |
| 4.78  | 7.61  | 2.01  | 4.13 | 1.81 | 异常 肝囊肿          |
| 5.03  | 5.42  | 1.67  | 3.07 | 1.39 | 异常 肝内强回声斑(未初    |
| 6.02  | 4.94  | 1.43  | 2.25 | 1.82 | 未见异常            |
| 5.54  | 4.83  | 2.73  | 2.56 | 1.10 | 异常 1、脂肪肝声像; 2、  |
| 4.64  | 5.22  | 1.42  | 2.50 | 1.96 | 未见异常            |
| 5.10  | 8.73  | 3.78  | 4.25 | 2.12 | 异常 肝内强回声斑(考虑    |
| 5.01  | 5.84  | 1.03  | 3.05 | 1.93 | 未见异常            |
| 5.02  | 5.78  | 1.05  | 3.10 | 1.46 | 未见异常            |
| 4.54  | 5.12  | 10.04 | 2.88 | 1.15 | 异常 胆囊结石         |
| 4.59  | 6.19  | 1.98  | 3.33 | 1.62 | 异常 脂肪肝声像        |
| 7.32  | 6.77  | 1.95  | 3.71 | 1.70 | 未见异常            |
| 5.11  | 6.28  | 1.20  | 3.05 | 2.04 | 未见异常            |
| 4.99  | 5.75  | 1.58  | 2.97 | 1.68 | 未见异常            |
| 6.71  | 7.82  | 2.35  | 4.51 | 1.53 | 异常 脂肪肝声像        |
| 5.18  | 5.37  | 1.51  | 2.89 | 1.55 | 异常 轻度脂肪肝声像      |
| 4.91  | 5.90  | 1.92  | 3.14 | 1.47 | 异常 脂肪肝声像        |
| 5.34  | 5.41  | 1.55  | 2.17 | 2.01 | 未见异常            |
| 5.24  | 6.99  | 1.65  | 3.62 | 2.13 | 未见异常            |
| 5.78  | 6.39  | 1.45  | 3.96 | 1.46 | 异常 腹部B超: 脂肪肝声像  |
| 5.42  | 8.49  | 3.34  | 4.66 | 1.58 | 异常 脂肪肝声像        |
| 5.40  | 5.97  | 0.93  | 3.09 | 1.70 | 未见异常            |
| 5.01  | 4.53  | 1.06  | 1.91 | 1.91 | 未见异常            |
| 8.14  | 6.54  | 1.19  | 3.66 | 1.84 | 未见异常            |
| 5.46  | 5.85  | 1.21  | 3.36 | 1.53 | 未见异常            |
| 4.50  | 5.72  | 1.79  | 3.02 | 1.53 | 未见异常            |
| 4.45  | 4.90  | 2.04  | 2.23 | 1.38 | 未见异常            |
| 6.51  | 6.80  | 2.04  | 3.62 | 1.58 | 异常 脂肪肝声像        |
| 4.61  | 6.58  | 3.00  | 3.19 | 1.62 | 未见异常            |
| 4.82  | 5.71  | 2.34  | 3.23 | 1.36 | 未见异常            |
| 5.56  | 6.68  | 1.54  | 3.41 | 1.65 | 异常 1、肝实质回声增粗2   |
| 5.54  | 4.51  | 0.90  | 2.04 | 1.70 | 异常 轻度脂肪肝        |
| 6.80  | 5.30  | 2.12  | 2.80 | 1.48 | 异常 轻度脂肪肝, 肝囊息   |
| 5.56  | 6.19  | 1.97  | 3.38 | 1.70 |                 |
| 5.31  | 5.76  | 3.13  | 3.00 | 1.36 | 未见异常            |

药酒

|       |      |      |      |      |      |                 |
|-------|------|------|------|------|------|-----------------|
| 6.17  | 2.83 | 0.94 | 1.28 | 0.99 | 异常   | 门静脉局部扩张         |
| 19.81 | 5.48 | 2.54 | 2.44 | 1.69 | 未见异常 |                 |
| 7.52  | 6.58 | 3.37 | 3.40 | 1.43 |      |                 |
| 4.51  | 6.30 | 1.87 | 3.71 | 1.24 | 未见异常 |                 |
| 4.80  | 7.01 | 1.68 | 3.78 | 1.89 | 未见异常 |                 |
| 7.32  | 5.47 | 2.16 | 1.94 | 1.13 | 异常   | 脂肪肝声像           |
| 8.62  | 6.06 | 1.91 | 3.57 | 1.56 | 异常   | 脂肪肝声像           |
| 10.55 | 3.93 | 1.02 | 1.70 | 1.67 | 未见异常 |                 |
| 5.54  | 6.13 | 3.11 | 3.24 | 1.60 | 异常   | 腹部B超：轻度脂肪肝      |
| 5.17  | 6.01 | 2.36 | 3.37 | 1.55 | 未见异常 |                 |
| 5.35  | 6.68 | 1.44 | 2.36 | 2.99 | 异常   | 肝囊肿             |
| 6.04  | 5.69 | 0.52 | 2.67 | 2.18 | 未见异常 |                 |
| 4.95  | 5.14 | 0.76 | 2.43 | 1.79 | 异常   | 肝内强回声结节(血管瘤)    |
| 4.90  | 6.35 | 1.92 | 3.46 | 1.48 | 异常   | 脂肪肝声像           |
| 5.31  | 6.08 | 7.00 | 1.47 | 1.46 | 未见异常 |                 |
| 5.21  | 6.65 | 1.73 | 4.00 | 1.48 | 未见异常 |                 |
| 4.44  | 6.22 | 1.45 | 3.69 | 1.38 | 异常   | 轻度脂肪肝声像。        |
| 4.57  | 6.27 | 2.08 | 3.43 | 1.59 | 异常   | 轻度脂肪肝声像         |
| 4.70  | 7.76 | 1.49 | 4.90 | 1.62 | 未见异常 |                 |
| 4.67  | 4.85 | 1.14 | 2.49 | 1.61 | 未见异常 |                 |
| 5.22  | 9.44 | 3.29 | 5.52 | 1.80 | 异常   | 轻度脂肪肝声像         |
| 4.70  | 5.73 | 0.84 | 2.86 | 1.82 | 异常   | 肝内强回声斑：考虑       |
| 5.47  | 6.90 | 1.27 | 3.67 | 1.72 | 未见异常 |                 |
| 7.82  | 6.99 | 1.27 | 3.69 | 1.99 | 未见异常 |                 |
| 4.57  | 5.50 | 3.01 | 2.41 | 1.71 | 异常   | 1. 实质光点回声增粗     |
| 6.59  | 6.82 | 1.36 | 3.97 | 1.68 | 异常   | 脂肪肝，肝囊肿         |
| 4.98  | 7.65 | 1.58 | 4.22 | 1.87 | 异常   | 1. 脂肪肝声像 2. 肝囊肿 |
| 5.17  | 6.20 | 0.94 | 2.61 | 2.37 | 异常   | 肝实质回声稍粗，肝       |
| 5.70  | 6.26 | 2.57 | 3.31 | 1.62 | 异常   | 轻度脂肪肝声像         |
| 6.54  | 9.71 | 1.08 | 5.10 | 2.75 | 异常   | 肝内囊性回声（考虑       |
| 4.84  | 4.64 | 1.73 | 2.24 | 1.62 | 异常   | 胆囊息肉样病变         |
| 5.40  | 3.36 | 0.75 | 1.29 | 1.55 | 异常   | 胆囊多发结石。         |
| 6.79  | 4.05 | 1.91 | 1.94 | 1.36 | 异常   | 轻度脂肪肝声像         |
| 5.80  | 6.96 | 1.55 | 4.13 | 1.38 | 未见异常 |                 |
| 4.68  | 4.60 | 0.69 | 2.04 | 1.63 | 异常   | 胆囊内强回声（考虑       |
| 5.29  | 6.63 | 1.04 | 3.69 | 1.91 | 未见异常 |                 |
| 6.04  | 8.47 | 2.84 | 4.72 | 1.61 | 异常   | 轻度脂肪肝声像         |
| 5.21  | 5.80 | 0.80 | 3.17 | 1.75 | 未见异常 |                 |
| 6.12  | 4.67 | 2.33 | 2.15 | 1.55 | 异常   | 胆囊结石            |
| 5.34  | 6.17 | 0.72 | 3.19 | 1.82 | 未见异常 |                 |
| 9.40  | 6.07 | 2.28 | 3.57 | 0.88 | 异常   | 脂肪肝声像           |
| 4.46  | 5.25 | 1.18 | 2.31 | 1.84 | 异常   | 轻度脂肪肝           |
| 8.04  | 5.11 | 0.91 | 3.04 | 1.21 | 未见异常 |                 |
| 5.62  | 5.92 | 2.36 | 3.18 | 1.22 | 异常   | 胆囊切除术           |
| 4.21  | 6.90 | 5.70 | 2.62 | 1.51 | 异常   | 脂肪肝声像           |
| 5.32  | 5.49 | 0.82 | 2.13 | 2.15 | 未见异常 |                 |
| 11.34 | 6.00 | 2.37 | 3.31 | 1.50 | 异常   | 脂肪肝声像           |
| 4.41  | 6.05 | 1.18 | 2.24 | 2.02 | 未见异常 |                 |
| 6.03  | 6.27 | 2.17 | 3.20 | 1.79 | 异常   | 脂肪肝声像           |
| 6.99  | 6.86 | 2.45 | 3.82 | 1.81 | 异常   | 轻度脂肪肝；肝囊肿       |
| 4.93  | 5.11 | 1.19 | 2.69 | 1.75 | 未见异常 |                 |

|       |      |      |      |      |                  |
|-------|------|------|------|------|------------------|
| 5.83  | 4.92 | 0.62 | 2.01 | 2.00 | 未见异常             |
| 5.79  | 3.42 | 3.33 | 1.53 | 0.88 | 异常 脂肪肝声像         |
| 9.66  | 5.05 | 2.34 | 2.64 | 1.36 | 异常 脂肪肝声像         |
| 5.19  | 3.83 | 0.95 | 1.72 | 1.52 | 未见异常             |
| 4.34  | 4.47 | 0.47 | 1.64 | 2.07 |                  |
| 4.37  | 6.96 | 2.32 | 4.08 | 1.57 | 未见异常             |
| 11.32 | 7.77 | 8.28 | 1.61 | 1.47 | 异常 脂肪肝声像         |
| 4.67  | 8.16 | 4.29 | 4.21 | 1.48 | 异常 脂肪肝声像         |
| 4.45  | 4.86 | 2.72 | 2.43 | 1.38 | 未见异常             |
| 5.84  | 5.69 | 0.76 | 2.75 | 1.94 | 异常 轻度脂肪肝         |
| 4.29  | 5.00 | 1.53 | 2.23 | 1.88 | 未见异常             |
| 5.37  | 6.00 | 1.64 | 3.21 | 1.59 | 异常 胆囊内强回声（考虑     |
| 5.19  | 6.01 | 2.55 | 3.19 | 1.46 | 异常 胆囊结石          |
| 4.72  | 5.59 | 6.98 | 2.57 | 1.67 | 异常 肝内多发囊肿        |
| 4.45  | 5.35 | 1.38 | 2.68 | 1.43 | 异常 轻度脂肪肝         |
| 9.72  | 6.10 | 1.88 | 2.91 | 2.17 | 异常 1. 脂肪肝声像2. 胆囊 |
| 4.75  | 6.96 | 0.61 | 3.58 | 2.33 | 未见异常             |
| 5.40  | 6.05 | 2.03 | 3.30 | 1.61 | 未见异常             |
| 6.95  | 5.89 | 1.40 | 2.91 | 1.87 | 异常 脂肪肝声像         |
| 5.57  | 8.85 | 1.72 | 5.00 | 1.87 | 未见异常             |
| 6.63  | 6.55 | 2.94 | 3.55 | 1.30 | 异常 肝胆脾胰B超：脂肪肝    |
| 4.75  | 6.55 | 0.83 | 3.30 | 2.02 | 未见异常             |
| 5.15  | 5.02 | 1.48 | 2.68 | 1.54 |                  |
| 13.08 | 7.96 | 1.68 | 4.53 | 1.73 | 异常 轻度脂肪肝声像       |
| 5.61  | 5.41 | 0.92 | 2.75 | 1.55 | 未见异常             |
| 4.81  | 4.56 | 0.97 | 2.14 | 1.85 | 未见异常             |
| 4.02  | 6.15 | 2.43 | 3.51 | 1.41 | 未见异常             |
| 4.85  | 5.71 | 2.81 | 2.76 | 1.53 | 异常 轻度脂肪肝声像       |
| 5.15  | 6.05 | 1.26 | 2.95 | 1.96 | 未见异常             |
| 5.40  | 3.97 | 1.34 | 1.86 | 1.45 | 异常 肝内囊性回声（考虑     |
| 4.77  | 6.43 | 2.43 | 3.53 | 1.47 | 异常 1、肝囊肿 2、胆囊炎   |
| 4.50  | 7.39 | 2.16 | 4.24 | 1.93 | 异常 肝多发囊性回声       |
| 5.44  | 7.04 | 3.00 | 3.37 | 2.07 | 未见异常             |
| 12.44 | 3.56 | 1.04 | 1.80 | 1.20 | 异常 1、轻度脂肪肝声像；    |
| 4.66  | 6.58 | 1.09 | 3.48 | 1.72 | 异常 肝囊肿           |
| 7.65  | 5.26 | 2.23 | 2.58 | 1.50 | 异常 轻度脂肪肝         |
| 4.30  | 5.55 | 2.81 | 3.11 | 1.45 | 异常 脂肪肝声像         |
| 4.61  | 6.22 | 0.67 | 3.61 | 1.57 | 未见异常             |
| 5.14  | 6.18 | 1.63 | 3.13 | 1.69 | 异常 肝右叶稍高回声结节     |
| 4.93  | 5.49 | 2.19 | 2.92 | 1.66 | 未见异常             |
| 4.76  | 4.76 | 1.47 | 2.38 | 1.54 | 异常 脂肪肝           |
| 5.16  | 5.56 | 1.23 | 2.67 | 1.88 | 未见异常             |
| 4.75  | 5.44 | 1.10 | 2.82 | 1.68 | 异常 1、肝囊肿2、胆囊息    |
| 5.27  | 7.57 | 1.47 | 4.77 | 1.53 | 未见异常             |
| 7.14  | 4.18 | 1.93 | 1.76 | 1.61 | 异常 胆囊结石          |
| 6.53  | 5.03 | 3.02 | 2.42 | 1.37 | 异常 轻度脂肪肝声像；肝     |
| 5.45  | 5.80 | 1.99 | 2.87 | 1.64 | 异常 轻度脂肪肝声像       |
| 5.28  | 4.43 | 1.23 | 2.19 | 1.46 | 未见异常             |
| 5.85  | 5.42 | 1.62 | 3.06 | 1.24 | 异常 轻度脂肪肝声像       |
| 4.60  | 5.48 | 0.72 | 2.17 | 2.06 | 未见异常             |
| 5.04  | 8.24 | 1.84 | 5.09 | 1.69 | 异常 脂肪肝声像         |

|      |      |      |      |      |      |             |
|------|------|------|------|------|------|-------------|
| 5.19 | 7.36 | 1.16 | 4.22 | 1.85 | 未见异常 |             |
| 5.70 | 6.33 | 1.68 | 3.07 | 1.98 | 异常   | 肝内囊性回声（考虑   |
| 6.93 | 5.93 | 1.86 | 3.14 | 1.76 | 异常   | 脂肪肝，肝右叶片状   |
| 7.36 | 7.43 | 3.67 | 3.83 | 1.51 | 异常   | 腹部B超：轻度脂肪肝  |
| 6.47 | 4.62 | 1.48 | 1.96 | 1.62 | 未见异常 |             |
| 5.96 | 6.32 | 1.85 | 3.55 | 1.75 | 异常   | 脂肪肝声像。      |
| 5.01 | 7.60 | 2.51 | 4.53 | 1.74 | 未见异常 |             |
| 5.03 | 4.60 | 0.73 | 2.35 | 1.56 | 异常   | 肝囊肿         |
| 7.50 | 3.96 | 0.61 | 1.87 | 1.55 | 异常   | 胆囊息肉样病变     |
| 5.59 | 8.08 | 2.09 | 4.22 | 2.00 | 未见异常 |             |
| 6.60 | 5.66 | 1.26 | 3.11 | 1.54 | 异常   | 轻度脂肪肝声像     |
| 4.60 | 4.68 | 2.27 | 2.26 | 1.48 | 未见异常 |             |
| 6.17 | 6.10 | 0.77 | 2.69 | 2.10 | 异常   | 肝内强回声斑      |
| 4.50 | 5.20 | 0.97 | 2.55 | 1.74 | 异常   | 轻度脂肪肝       |
| 5.06 | 5.99 | 1.23 | 3.43 | 1.54 | 异常   | 脂肪肝声像       |
| 7.63 | 6.85 | 3.01 | 3.57 | 1.66 | 异常   | 脂肪肝声像       |
| 5.26 | 6.96 | 1.44 | 4.04 | 1.65 | 异常   | 轻度脂肪肝声像     |
| 6.06 | 4.68 | 1.10 | 1.93 | 1.75 | 异常   | 肝内外胆管结石并扩   |
| 4.87 | 6.63 | 1.48 | 3.74 | 1.59 | 未见异常 |             |
| 9.26 | 6.78 | 2.24 | 3.92 | 1.61 | 未见异常 |             |
| 6.87 | 7.11 | 1.91 | 4.21 | 1.32 | 未见异常 |             |
| 5.99 | 5.14 | 1.74 | 2.87 | 1.25 | 未见异常 |             |
| 7.56 | 4.17 | 2.88 | 2.29 | 1.08 | 异常   | 脂肪肝声像       |
| 4.34 | 6.32 | 2.31 | 3.50 | 1.37 | 异常   | 轻度脂肪肝；胆囊壁和  |
| 5.75 | 6.16 | 7.33 | 1.76 | 1.38 | 异常   | 轻度脂肪肝声像     |
| 5.19 | 6.24 | 0.68 | 2.37 | 2.51 | 未见异常 |             |
| 5.98 | 6.44 | 2.05 | 3.71 | 1.44 | 异常   | 肝内强回声斑：考虑   |
| 4.65 | 6.46 | 1.67 | 3.05 | 2.28 | 异常   | 胆囊内强回声（考虑   |
| 4.64 | 6.23 | 1.22 | 3.79 | 1.60 |      |             |
| 4.86 | 7.37 | 1.75 | 4.21 | 1.81 | 未见异常 |             |
| 4.51 | 5.76 | 1.73 | 3.07 | 1.64 | 异常   | 所示范围内脂肪肝声   |
| 5.70 | 7.01 | 1.17 | 4.04 | 1.91 | 异常   | 肝内囊性回声      |
| 4.75 | 7.37 | 1.71 | 4.20 | 1.48 | 异常   | 肝内强回声斑，考虑   |
| 5.56 | 7.06 | 1.47 | 4.21 | 1.48 | 异常   | 轻度脂肪肝       |
| 5.61 | 5.58 | 2.59 | 3.01 | 1.40 | 异常   | 轻度脂肪肝       |
| 4.37 | 6.08 | 1.43 | 3.66 | 1.69 |      |             |
| 6.29 | 5.79 | 4.65 | 2.51 | 1.23 | 异常   | 轻度脂肪肝声像     |
| 5.46 | 5.85 | 3.24 | 3.00 | 1.60 | 未见异常 |             |
| 7.54 | 6.09 | 3.31 | 2.94 | 1.75 | 异常   | 轻度脂肪肝声像     |
| 4.63 | 4.42 | 2.00 | 2.13 | 1.39 | 未见异常 |             |
| 3.79 | 4.00 | 1.41 | 2.16 | 1.18 | 异常   | 腹部B超：1.脂肪肝声 |
| 5.77 | 4.68 | 0.96 | 2.17 | 1.69 | 异常   | 脂肪肝声像，肝内强   |
| 6.49 | 4.12 | 1.37 | 2.06 | 1.53 | 异常   | 胆囊点状稍高回声，   |
| 4.59 | 4.31 | 1.60 | 2.49 | 1.16 | 未见异常 |             |
| 4.37 | 5.09 | 1.12 | 2.86 | 1.21 | 未见异常 |             |
| 5.97 | 5.48 | 0.78 | 2.55 | 1.92 | 未见异常 |             |
| 5.26 | 4.69 | 1.24 | 2.52 | 1.48 | 异常   | 轻度脂肪肝声像     |
| 7.53 | 5.45 | 0.86 | 2.98 | 1.30 | 异常   | 轻度脂肪肝声像     |
| 6.09 | 6.33 | 1.60 | 3.31 | 1.87 | 未见异常 |             |
| 4.65 | 4.59 | 0.88 | 2.22 | 1.60 | 未见异常 |             |
| 4.91 | 4.71 | 2.80 | 2.29 | 1.42 | 异常   | 脂肪肝声像       |

|       |      |      |      |      |                  |
|-------|------|------|------|------|------------------|
| 5.32  | 6.06 | 1.14 | 3.34 | 1.36 | 未见异常             |
| 5.13  | 4.87 | 1.10 | 2.59 | 1.67 | 异常 胆囊内强回声（考虑     |
| 5.03  | 5.46 | 1.37 | 3.15 | 1.39 | 异常 轻度脂肪肝         |
| 7.14  | 6.23 | 0.92 | 3.95 | 1.47 | 异常 轻度脂肪肝声像       |
| 5.69  | 5.04 | 0.84 | 2.29 | 1.91 | 未见异常             |
| 5.78  | 6.54 | 0.91 | 3.29 | 2.04 | 未见异常             |
| 5.58  | 8.13 | 3.06 | 4.71 | 1.89 | 异常 轻度脂肪肝声像       |
| 6.23  | 4.53 | 3.00 | 2.53 | 1.24 | 异常 轻度脂肪肝声像       |
| 5.79  | 5.42 | 1.37 | 2.99 | 1.62 | 异常 腹部B超：轻度脂肪肝    |
| 4.48  | 5.82 | 1.83 | 3.18 | 1.69 | 异常 1. 胆囊多发息肉样病   |
| 4.65  | 5.61 | 2.17 | 3.34 | 1.43 | 未见异常             |
| 5.02  | 4.98 | 2.66 | 2.33 | 1.59 | 异常 肝内强回声斑：考虑     |
| 4.98  | 5.29 | 1.03 | 3.19 | 1.05 | 异常 轻度脂肪肝         |
| 4.18  | 6.54 | 1.87 | 3.53 | 1.44 | 异常 胆囊内强回声（考虑     |
| 4.20  | 3.76 | 3.11 | 1.78 | 1.11 | 异常 轻度脂肪肝声像       |
| 4.33  | 7.35 | 2.61 | 3.98 | 1.81 | 未见异常             |
| 4.84  | 3.91 | 1.06 | 1.37 | 1.85 | 未见异常             |
| 4.02  | 5.46 | 0.97 | 3.13 | 1.48 | 异常 肝囊肿，胆囊结石      |
| 8.24  | 5.77 | 2.27 | 2.97 | 1.47 | 异常 轻度脂肪肝声像       |
| 5.26  | 5.78 | 1.03 | 2.63 | 1.95 | 未见异常             |
| 6.09  | 5.67 | 2.85 | 3.05 | 1.60 | 异常 轻度脂肪肝声像       |
| 4.78  | 5.01 | 0.82 | 1.90 | 2.24 | 异常 肝多发囊肿         |
| 4.96  | 6.04 | 1.30 | 3.23 | 1.57 | 未见异常             |
| 5.38  | 4.37 | 2.47 | 2.15 | 1.23 | 未见异常             |
| 5.10  | 3.80 | 1.11 | 1.76 | 1.31 | 异常 胆囊息肉样病变       |
| 4.94  | 4.71 | 2.32 | 2.41 | 1.58 | 异常 脂肪肝声像         |
| 7.52  | 6.32 | 4.59 | 2.91 | 1.69 | 异常 轻度脂肪肝声像       |
| 4.90  | 7.55 | 2.22 | 4.00 | 1.76 | 未见异常             |
| 4.84  | 3.19 | 1.51 | 1.34 | 1.25 | 未见异常             |
| 5.19  | 4.97 | 1.75 | 2.55 | 1.47 | 未见异常             |
| 4.36  | 5.66 | 1.44 | 2.97 | 1.71 | 异常 1. 肝囊肿2. 胆囊结石 |
| 4.80  | 6.39 | 1.72 | 3.33 | 2.01 | 未见异常             |
| 4.46  | 5.65 | 1.75 | 3.01 | 1.62 | 异常 轻度脂肪肝         |
| 4.28  | 5.81 | 1.64 | 3.08 | 1.59 | 异常 轻度脂肪肝         |
| 3.30  | 4.34 | 0.66 | 2.21 | 1.29 | 异常 1、轻度脂肪肝声像2    |
| 4.58  | 3.69 | 2.07 | 1.72 | 1.21 | 异常 肝小囊肿          |
| 4.54  | 7.09 | 2.74 | 3.79 | 1.46 | 异常 囊内强回声（考虑结     |
| 6.66  | 5.44 | 2.16 | 2.93 | 1.69 | 异常 脂肪肝声像         |
| 4.70  | 4.89 | 1.32 | 1.95 | 1.96 | 异常 肝内强回声斑(考虑结    |
| 7.36  | 6.56 | 2.06 | 3.18 | 2.08 | 异常 轻度脂肪肝声像       |
| 4.90  | 4.60 | 3.17 | 2.14 | 1.40 | 未见异常             |
| 4.95  | 4.24 | 1.69 | 2.11 | 1.12 | 异常 轻度脂肪肝声像、肝     |
| 4.62  | 7.76 | 1.47 | 4.08 | 2.08 | 未见异常             |
| 4.11  | 6.49 | 1.31 | 3.54 | 1.48 | 未见异常             |
| 5.38  | 4.14 | 2.52 | 1.73 | 1.21 | 异常 轻度脂肪肝声像       |
| 5.57  | 5.40 | 1.61 | 3.24 | 1.34 |                  |
| 4.38  | 6.67 | 2.18 | 3.70 | 1.60 | 异常 脂肪肝声像         |
| 3.66  | 6.42 | 3.67 | 3.15 | 1.54 | 异常 脂肪肝声像         |
| 11.37 | 5.14 | 1.41 | 2.92 | 1.15 | 未见异常             |
| 7.71  | 7.13 | 1.09 | 4.04 | 1.65 | 未见异常             |
| 6.21  | 7.13 | 1.56 | 3.33 | 2.17 | 未见异常             |

|      |      |      |      |      |               |
|------|------|------|------|------|---------------|
| 4.81 | 5.00 | 1.98 | 2.51 | 1.36 | 未见异常          |
| 4.99 | 4.37 | 3.33 | 1.99 | 1.34 | 异常 轻度脂肪肝声像,肝囊 |
| 4.80 | 4.89 | 0.97 | 2.78 | 1.50 | 未见异常          |
| 4.44 | 5.06 | 0.77 | 1.73 | 2.17 | 异常 肝内强回声斑     |
| 4.73 | 5.94 | 2.16 | 3.14 | 1.40 | 异常 所示范围内轻度脂肪  |
| 4.83 | 7.36 | 1.68 | 4.18 | 1.68 | 异常 轻度脂肪肝声像    |
| 5.71 | 5.98 | 1.66 | 3.76 | 1.49 | 异常 轻度脂肪肝声像。   |
| 4.25 | 4.42 | 0.79 | 2.19 | 1.58 | 未见异常          |
| 4.81 | 7.05 | 1.99 | 3.93 | 1.61 | 异常 脂肪肝声像; 肝左叶 |
| 4.85 | 6.23 | 1.73 | 3.78 | 1.41 | 未见异常          |
| 4.74 | 6.31 | 0.73 | 3.16 | 2.10 | 未见异常          |
| 5.06 | 5.91 | 1.50 | 2.63 | 2.18 | 异常 肝囊肿        |
| 5.36 | 6.19 | 1.42 | 3.87 | 1.47 | 异常 脂肪肝声像。     |
| 5.22 | 6.49 | 2.23 | 3.54 | 1.79 | 未见异常          |
| 5.36 | 2.76 | 0.91 | 1.07 | 1.08 | 未见异常          |
| 8.41 | 5.74 | 3.61 | 2.87 | 1.56 | 异常 轻度脂肪肝声像    |
| 4.49 | 6.97 | 0.92 | 3.97 | 1.83 | 异常 轻度脂肪肝声像    |
| 4.82 | 4.46 | 0.82 | 1.99 | 1.53 | 未见异常          |
| 4.55 | 5.23 | 1.15 | 2.59 | 1.64 | 异常 肝内强回声斑: 考虑 |
| 6.70 | 3.87 | 1.45 | 1.79 | 1.39 | 未见异常          |
| 5.13 | 6.58 | 1.17 | 3.53 | 1.75 | 未见异常          |
| 6.06 | 6.70 | 1.86 | 4.09 | 1.55 | 未见异常          |
| 5.80 | 7.41 | 2.12 | 3.82 | 2.04 | 异常 脂肪肝声像      |
| 5.12 | 6.38 | 0.85 | 3.74 | 1.97 | 未见异常          |
| 5.32 | 6.51 | 0.83 | 3.32 | 2.11 | 异常 胆囊内强回声(考虑  |
| 4.22 | 3.23 | 1.68 | 1.41 | 1.18 | 异常 肝内强回声斑     |
| 5.48 | 8.04 | 2.04 | 4.36 | 1.74 | 异常 肝囊肿        |
| 4.63 | 5.34 | 1.11 | 2.80 | 1.67 | 异常 胆囊结石       |
| 7.68 | 6.56 | 2.68 | 3.25 | 1.56 | 异常 肝囊肿        |
| 6.67 | 6.31 | 1.36 | 3.28 | 1.51 | 异常 1、脂肪肝声像2、胆 |
| 5.83 | 9.13 | 3.03 | 5.23 | 2.15 | 异常 轻度脂肪肝声像    |
| 5.43 | 5.92 | 1.26 | 3.44 | 1.67 | 异常 脂肪肝声像。     |
| 5.34 | 7.10 | 2.03 | 3.71 | 1.89 | 未见异常          |
| 4.87 | 6.24 | 1.15 | 2.71 | 2.01 | 未见异常          |
| 8.28 | 7.94 | 4.31 | 3.73 | 1.66 | 异常 胆囊结石       |
| 4.42 | 5.17 | 1.25 | 2.48 | 1.80 | 异常 肝实质回声稍增粗   |
| 5.59 | 6.92 | 2.13 | 3.78 | 1.65 | 异常 脂肪肝声像, 肝囊肿 |
| 5.81 | 5.35 | 3.97 | 2.42 | 1.31 |               |
| 4.87 | 5.29 | 3.14 | 2.74 | 1.39 | 异常 肝多发囊肿; 轻度脂 |
| 5.92 | 4.79 | 2.71 | 2.48 | 1.19 | 未见异常          |
| 6.59 | 4.04 | 2.20 | 1.84 | 1.28 | 异常 轻度脂肪肝      |
| 4.74 | 4.69 | 1.19 | 2.23 | 1.70 | 异常 脂肪肝声像      |
| 5.44 | 5.70 | 2.13 | 1.60 | 3.24 | 异常 胆囊稍高回声结节,  |
| 5.00 | 5.59 | 1.10 | 2.36 | 1.98 | 异常 肝小囊肿       |
| 5.13 | 5.24 | 1.03 | 2.77 | 1.69 | 异常 脂肪肝声像      |
| 4.93 | 6.76 | 2.22 | 3.53 | 1.87 | 异常 脂肪肝声像, 胆囊结 |
| 4.40 | 5.13 | 1.33 | 2.45 | 1.77 | 异常 肝左叶无回声区    |
| 6.19 | 7.72 | 0.96 | 3.71 | 2.12 | 异常 轻度脂肪肝, 胆囊增 |
| 5.45 | 4.53 | 0.80 | 2.09 | 1.69 | 未见异常          |
| 5.22 | 4.72 | 2.33 | 2.28 | 1.32 | 异常 轻度脂肪肝声像    |
| 5.62 | 5.95 | 1.44 | 3.28 | 1.62 | 异常 轻度脂肪肝声像。   |

|       |      |      |      |      |      |            |
|-------|------|------|------|------|------|------------|
| 5.08  | 6.28 | 1.81 | 3.54 | 1.53 | 异常   | 胆囊充满型结石声像  |
| 6.93  | 5.74 | 1.54 | 2.92 | 1.64 | 异常   | 轻度脂肪肝声像    |
| 5.36  | 4.87 | 2.15 | 2.57 | 1.37 | 未见异常 |            |
| 4.59  | 6.71 | 2.36 | 3.85 | 1.30 | 异常   | 轻度脂肪肝，肝内强  |
| 5.85  | 6.90 | 2.28 | 3.87 | 1.79 | 未见异常 |            |
| 5.04  | 6.08 | 1.35 | 3.46 | 1.65 | 异常   | 肝囊肿        |
| 5.55  | 5.96 | 0.84 | 2.93 | 1.82 | 异常   | 肝囊肿        |
| 5.35  | 4.30 | 2.39 | 2.00 | 1.60 | 异常   | 胆囊息肉样病变    |
| 4.93  | 5.60 | 2.22 | 2.95 | 1.60 | 异常   | 脂肪肝声像      |
| 4.93  | 7.28 | 2.00 | 3.92 | 1.62 | 未见异常 |            |
| 5.56  | 6.18 | 0.77 | 3.53 | 1.76 | 未见异常 |            |
| 6.92  | 4.96 | 2.10 | 2.75 | 1.22 | 未见异常 |            |
| 7.48  | 7.61 | 1.55 | 4.77 | 1.51 | 异常   | 脂肪肝声像。     |
| 16.69 | 6.50 | 4.51 | 3.35 | 1.45 | 异常   | 脂肪肝声像。     |
| 4.56  | 5.27 | 1.27 | 2.58 | 1.62 | 未见异常 |            |
| 5.65  | 5.26 | 1.50 | 2.33 | 1.85 | 未见异常 |            |
| 4.61  | 6.14 | 1.16 | 2.62 | 2.28 | 异常   | 肝实质性回声稍增粗  |
| 4.51  | 5.65 | 1.23 | 3.01 | 1.85 | 未见异常 |            |
| 5.47  | 7.82 | 1.23 | 4.77 | 1.98 |      |            |
| 5.77  | 7.28 | 3.29 | 3.77 | 1.61 | 异常   | 所示范围内脂肪肝声  |
| 7.61  | 4.20 | 1.04 | 1.86 | 1.46 | 未见异常 |            |
| 4.41  | 5.02 | 0.54 | 1.91 | 2.36 | 未见异常 |            |
| 4.49  | 5.80 | 0.50 | 2.45 | 2.33 | 异常   | 肝囊肿        |
| 4.88  | 7.57 | 1.53 | 4.36 | 1.82 | 未见异常 |            |
| 6.53  | 4.36 | 2.31 | 2.14 | 1.23 | 异常   | 肝肾区囊性回声包块  |
| 10.00 | 6.75 | 1.31 | 3.30 | 1.88 | 异常   | 胆囊息肉样病变    |
| 6.83  | 5.69 | 1.62 | 3.01 | 1.64 | 异常   | 肝囊肿        |
| 7.10  | 4.42 | 1.23 | 2.30 | 1.33 | 异常   | 脂肪肝声像      |
| 4.91  | 6.61 | 1.32 | 2.92 | 2.36 | 异常   | 脂肪肝声像      |
| 5.20  | 4.35 | 1.27 | 2.27 | 1.52 | 异常   | 1、脂肪肝声像；2、 |
| 5.70  | 4.62 | 0.50 | 2.04 | 1.62 | 异常   | 胆囊切除后声像改变  |
| 9.27  | 7.84 | 1.10 | 4.30 | 2.12 | 未见异常 |            |
| 5.95  | 4.36 | 2.01 | 2.18 | 1.35 | 异常   | 腹部B超：胆囊壁欠  |
| 6.87  | 7.86 | 1.43 | 5.14 | 1.65 | 未见异常 |            |
| 4.70  | 6.05 | 1.96 | 1.37 | 3.59 | 异常   | 脂肪肝声像      |
| 5.99  | 5.56 | 2.03 | 3.07 | 1.47 | 异常   | 脂肪肝声像      |
| 9.25  | 5.60 | 2.57 | 2.73 | 1.42 | 异常   | 脂肪肝声像      |
| 6.41  | 7.20 | 3.57 | 3.64 | 1.54 | 异常   | 轻度脂肪肝      |
| 5.05  | 5.88 | 0.75 | 2.78 | 1.91 | 异常   | 胆囊结石       |
| 5.09  | 3.91 | 1.28 | 1.55 | 1.57 | 未见异常 |            |
| 4.80  | 8.99 | 1.99 | 4.61 | 2.09 | 异常   | 肝内强回声斑，考虑  |
| 5.66  | 5.45 | 0.86 | 2.77 | 1.80 | 未见异常 |            |
| 4.74  | 5.86 | 1.32 | 2.92 | 1.82 | 未见异常 |            |
| 4.86  | 4.27 | 0.75 | 1.73 | 1.63 | 未见异常 |            |
| 4.79  | 7.51 | 8.75 | 1.63 | 1.24 | 未见异常 |            |
| 5.53  | 5.60 | 5.24 | 2.23 | 1.20 | 异常   | 脂肪肝声像      |
| 5.27  | 8.43 | 1.85 | 4.88 | 1.94 | 未见异常 |            |
| 6.10  | 5.14 | 3.50 | 2.58 | 1.15 | 异常   | 脂肪肝声像      |
| 5.97  | 7.32 | 1.40 | 3.92 | 2.02 | 未见异常 |            |
| 5.53  | 4.27 | 2.68 | 2.09 | 1.28 | 异常   | 轻度脂肪肝声像    |
| 6.47  | 5.02 | 1.43 | 2.49 | 1.67 | 异常   | 肝内强回声斑，考虑  |

|       |      |      |      |      |      |             |
|-------|------|------|------|------|------|-------------|
| 4.49  | 6.41 | 1.57 | 3.69 | 1.60 | 异常   | 胆囊结石        |
| 6.86  | 6.01 | 2.91 | 3.00 | 1.74 | 异常   | 脂肪肝声像       |
| 4.57  | 6.83 | 3.03 | 3.63 | 1.42 | 异常   | 不均质脂肪肝声像    |
| 8.92  | 4.76 | 1.17 | 2.31 | 1.49 | 异常   | 肝内强回声斑：考虑   |
| 4.68  | 9.76 | 2.24 | 5.16 | 2.44 | 未见异常 |             |
| 4.71  | 4.95 | 1.19 | 2.54 | 1.48 | 未见异常 |             |
| 5.10  | 5.84 | 1.05 | 2.92 | 1.84 | 异常   | 轻度脂肪肝       |
| 13.30 | 5.17 | 0.82 | 2.89 | 1.57 | 未见异常 |             |
| 5.31  | 4.28 | 1.20 | 1.84 | 1.45 | 未见异常 |             |
| 5.41  | 5.15 | 1.37 | 2.44 | 1.78 | 未见异常 |             |
| 6.44  | 6.20 | 3.82 | 3.16 | 1.63 | 异常   | 脂肪肝声像       |
| 5.11  | 6.50 | 1.73 | 4.06 | 1.28 | 异常   | 脂肪肝声像       |
| 4.70  | 8.04 | 2.33 | 5.04 | 1.71 | 异常   | 脂肪肝声像       |
| 4.97  | 5.71 | 3.09 | 2.91 | 1.31 | 异常   | 轻度脂肪肝声像     |
| 4.17  | 5.17 | 1.97 | 2.52 | 1.51 | 未见异常 |             |
| 7.21  | 6.76 | 1.92 | 3.94 | 1.55 | 未见异常 |             |
| 4.97  | 6.62 | 1.43 | 3.54 | 1.79 | 异常   | 肝囊肿         |
| 4.69  | 5.52 | 1.55 | 2.79 | 1.47 | 异常   | 肝内多发性囊肿，肝   |
| 6.74  | 5.77 | 1.02 | 3.37 | 1.34 | 异常   | 1、脂肪肝 2、肝囊肿 |
| 4.99  | 7.26 | 1.35 | 3.96 | 2.14 | 未见异常 |             |
| 6.03  | 6.46 | 2.00 | 3.29 | 1.82 | 未见异常 |             |
| 5.96  | 7.48 | 3.75 | 3.87 | 1.37 | 异常   | 1、脂肪肝声像 2、肝 |
| 5.24  | 6.94 | 1.60 | 3.98 | 1.78 | 异常   | 轻度脂肪肝声像     |
| 4.43  | 5.98 | 2.94 | 2.60 | 1.91 | 未见异常 |             |
| 4.44  | 5.65 | 0.90 | 2.94 | 1.73 | 异常   | 1、肝多发性囊肿，   |
| 5.46  | 4.81 | 3.78 | 2.13 | 1.39 | 异常   | 轻度脂肪肝声像     |
| 4.64  | 5.45 | 0.70 | 2.45 | 2.16 | 未见异常 |             |
| 4.67  | 7.93 | 3.00 | 4.57 | 1.75 | 异常   | 脂肪肝声像       |
| 5.73  | 5.35 | 3.02 | 2.58 | 1.49 | 未见异常 |             |
| 6.74  | 6.68 | 3.55 | 3.82 | 1.30 | 异常   | 脂肪肝声像       |
| 4.26  | 8.14 | 0.92 | 3.95 | 2.15 | 异常   | 肝内囊性回声（考虑   |
| 4.85  | 7.18 | 1.41 | 4.19 | 1.79 | 异常   | 肝内囊性回声（考虑   |
| 4.08  | 6.90 | 1.23 | 3.99 | 1.47 | 异常   | 胆囊内强回声，考虑   |
| 7.74  | 6.30 | 2.75 | 3.42 | 1.38 | 异常   | 脂肪肝声像       |
| 5.36  | 5.90 | 1.48 | 3.21 | 1.48 | 异常   | 轻度脂肪肝声像、胆   |
| 5.55  | 4.60 | 1.72 | 2.35 | 1.29 | 异常   | 轻度脂肪肝声像     |
| 4.95  | 5.11 | 1.54 | 2.52 | 1.63 | 异常   | 轻度脂肪肝       |
| 7.21  | 3.99 | 0.74 | 1.86 | 1.38 | 异常   | 肝囊肿         |
| 4.52  | 4.69 | 1.34 | 2.20 | 1.44 | 异常   | 肝囊肿 胆囊结石    |
| 4.91  | 4.02 | 0.90 | 2.03 | 1.29 | 未见异常 |             |
| 5.51  | 4.63 | 3.56 | 1.85 | 1.54 | 异常   | 腹部B超：1、脂肪肝  |
| 5.14  | 6.26 | 0.91 | 2.95 | 1.94 | 未见异常 |             |
| 4.94  | 5.64 | 2.80 | 2.77 | 1.60 | 异常   | 轻度脂肪肝声像     |
| 4.71  | 7.27 | 1.38 | 3.55 | 2.02 | 未见异常 |             |
| 4.63  | 5.91 | 1.92 | 2.50 | 2.36 | 未见异常 |             |
| 5.82  | 6.15 | 3.73 | 2.97 | 1.49 | 异常   | 胆囊结石        |
| 5.00  | 7.45 | 3.38 | 3.93 | 1.38 | 异常   | 胆囊息肉样病变     |
| 4.65  | 6.55 | 3.41 | 3.19 | 1.72 | 异常   | 肝囊肿         |
| 7.46  | 6.00 | 4.97 | 2.57 | 1.29 | 异常   | 脂肪肝声像       |
| 4.98  | 4.15 | 1.85 | 2.02 | 1.32 | 未见异常 |             |
| 4.87  | 3.28 | 1.90 | 1.35 | 1.15 | 异常   | 肝囊肿         |

|       |      |      |      |      |                  |
|-------|------|------|------|------|------------------|
| 5.47  | 6.09 | 0.84 | 3.15 | 1.82 | 未见异常             |
| 5.09  | 5.88 | 3.15 | 2.73 | 1.47 | 异常 轻度脂肪肝、胆囊多     |
| 4.78  | 5.31 | 1.53 | 2.80 | 1.44 | 未见异常             |
| 6.67  | 4.51 | 0.88 | 2.51 | 1.37 |                  |
| 6.99  | 6.41 | 1.71 | 3.79 | 1.80 | 未见异常             |
| 7.58  | 3.84 | 2.05 | 1.62 | 1.57 |                  |
| 5.76  | 5.75 | 1.29 | 3.27 | 1.05 | 异常 轻度脂肪肝声像       |
| 5.67  | 5.13 | 3.57 | 2.07 | 1.56 | 异常 脂肪肝声像         |
| 4.93  | 6.14 | 2.35 | 3.41 | 1.37 | 未见异常             |
| 5.46  | 6.41 | 0.81 | 3.21 | 1.83 | 未见异常             |
| 4.33  | 4.58 | 1.34 | 2.50 | 1.34 | 异常 轻度脂肪肝声像       |
| 4.77  | 7.50 | 1.02 | 4.23 | 1.97 | 未见异常             |
| 5.22  | 5.80 | 2.52 | 3.12 | 1.43 | 异常 轻度脂肪肝声像       |
| 4.98  | 6.01 | 1.28 | 3.59 | 1.65 | 异常 胆囊结石          |
| 10.19 | 7.22 | 1.74 | 4.10 | 1.57 | 未见异常             |
| 4.99  | 4.07 | 0.64 | 1.60 | 1.81 | 未见异常             |
| 5.16  | 4.89 | 0.78 | 1.52 | 2.28 | 未见异常             |
| 4.99  | 6.83 | 3.20 | 3.48 | 4.53 | 未见异常             |
| 5.87  | 7.73 | 1.49 | 4.59 | 1.76 | 异常 轻度脂肪肝声像       |
| 4.29  | 5.01 | 1.00 | 2.54 | 1.57 | 未见异常             |
| 4.66  | 6.13 | 1.70 | 3.53 | 1.46 | 异常 轻度脂肪肝声像       |
| 4.32  | 4.68 | 1.95 | 1.98 | 1.91 | 未见异常             |
| 6.69  | 3.71 | 1.59 | 1.27 | 1.65 | 异常 脂肪肝声像；肝囊肿     |
| 5.40  | 7.17 | 1.10 | 4.01 | 1.69 | 未见异常             |
| 5.07  | 6.80 | 0.81 | 4.14 | 1.92 | 未见异常             |
| 5.54  | 5.15 | 0.72 | 2.43 | 1.56 | 异常 肝实质回声稍增粗      |
| 5.40  | 6.43 | 1.82 | 2.37 | 2.74 | 异常 轻度脂肪肝声像       |
| 14.14 | 4.26 | 2.77 | 1.97 | 1.40 | 未见异常             |
| 4.62  | 6.20 | 1.99 | 3.34 | 1.62 | 未见异常             |
| 13.87 | 6.55 | 2.00 | 3.91 | 1.30 | 异常 1. 脂肪肝声像 2. 肝 |
| 5.53  | 7.06 | 1.82 | 3.60 | 1.60 | 未见异常             |
| 4.98  | 7.68 | 0.98 | 4.55 | 1.49 | 未见异常             |
| 5.67  | 6.41 | 0.84 | 3.55 | 1.85 | 未见异常             |
| 6.49  | 6.83 | 3.27 | 3.63 | 1.46 | 异常 脂肪肝声像         |
| 9.93  | 5.54 | 6.07 | 1.72 | 1.23 | 异常 轻度脂肪肝声像，胆     |
| 9.03  | 6.44 | 2.96 | 3.38 | 1.45 | 异常 肝内稍强回声小结节     |
| 5.11  | 6.08 | 1.12 | 3.15 | 1.96 | 异常 胆囊腔内强回声团（     |
| 5.84  | 6.30 | 1.29 | 3.57 | 1.84 | 异常 轻度脂肪肝声像       |
| 6.41  | 6.42 | 2.69 | 1.41 | 3.50 | 异常 脂肪肝声像         |
| 4.51  | 6.30 | 1.37 | 3.66 | 1.67 | 未见异常             |
| 5.48  | 7.75 | 2.25 | 4.53 | 2.00 | 异常 胆囊结石          |
| 5.37  | 5.94 | 2.62 | 3.15 | 1.70 | 异常 腹部B超：肝多发囊肿    |
| 5.83  | 6.26 | 1.63 | 3.42 | 1.51 | 未见异常             |
| 6.97  | 9.04 | 2.83 | 4.91 | 1.78 | 未见异常             |
| 4.91  | 8.09 | 1.15 | 4.44 | 2.06 | 未见异常             |
| 4.98  | 4.30 | 0.68 | 1.61 | 1.71 | 未见异常             |
| 9.33  | 5.51 | 1.93 | 3.03 | 1.63 | 异常 肝囊肿           |
| 5.91  | 5.35 | 2.10 | 2.70 | 1.72 | 异常 肝多发囊肿         |
| 4.44  | 4.88 | 1.15 | 2.64 | 1.56 | 异常 轻度脂肪肝声像       |
| 5.29  | 5.30 | 1.59 | 2.57 | 1.53 | 异常 胆囊内强回声（考虑     |
| 5.00  | 6.22 | 1.59 | 3.28 | 2.09 | 未见异常             |

|       |      |      |      |      |      |             |
|-------|------|------|------|------|------|-------------|
| 7.46  | 4.04 | 2.53 | 2.01 | 1.37 | 异常   | 脂肪肝声像       |
| 4.54  | 3.68 | 1.98 | 1.87 | 1.12 | 异常   | 脂肪肝声像       |
| 5.35  | 4.22 | 1.15 | 1.87 | 1.50 | 异常   | 脾大          |
| 5.12  | 5.82 | 1.37 | 2.89 | 1.68 | 未见异常 |             |
| 5.11  | 5.52 | 0.99 | 2.72 | 1.95 | 未见异常 |             |
| 5.23  | 5.44 | 1.00 | 3.10 | 1.62 | 未见异常 |             |
| 5.29  | 4.90 | 1.81 | 2.64 | 1.28 | 异常   | 轻度脂肪肝       |
| 4.27  | 5.52 | 1.00 | 3.00 | 1.59 | 未见异常 |             |
| 4.25  | 7.17 | 3.75 | 3.67 | 1.58 | 异常   | 脂肪肝声像       |
| 5.67  | 5.81 | 1.26 | 3.18 | 1.40 | 异常   | 轻度脂肪肝；肝囊肿   |
| 4.83  | 4.59 | 3.26 | 1.99 | 1.44 | 未见异常 |             |
| 5.40  | 5.96 | 1.05 | 3.11 | 1.73 | 异常   | 肝内强回声，考虑钙   |
| 4.88  | 7.78 | 1.46 | 4.24 | 1.98 | 异常   | 脂肪肝声像，肝内囊   |
| 5.04  | 6.49 | 1.05 | 2.86 | 2.12 | 未见异常 |             |
| 4.89  | 6.86 | 1.05 | 3.46 | 1.95 | 异常   | 轻度脂肪肝声像     |
| 5.90  | 5.10 | 1.67 | 2.01 | 1.89 | 异常   | 轻度脂肪肝声像     |
| 5.53  | 4.20 | 0.99 | 2.17 | 1.47 | 未见异常 |             |
| 11.14 | 6.95 | 1.44 | 3.83 | 1.76 | 异常   | 1、轻度脂肪肝声像2  |
| 4.23  | 5.12 | 1.66 | 2.16 | 1.99 | 异常   | 轻度脂肪肝声像     |
| 7.13  | 4.84 | 1.60 | 2.61 | 1.37 | 未见异常 |             |
| 4.77  | 4.52 | 1.63 | 2.35 | 1.28 | 异常   | 轻度脂肪肝，肝内强   |
| 4.44  | 6.42 | 1.12 | 2.84 | 2.23 | 异常   | 1.肝内强回声斑，考  |
| 6.24  | 4.61 | 2.24 | 2.22 | 1.39 | 未见异常 |             |
| 9.23  | 6.07 | 4.92 | 2.66 | 1.62 | 异常   | 轻度脂肪肝声像     |
| 4.85  | 5.83 | 1.12 | 3.31 | 1.64 | 异常   | 轻度脂肪肝声像     |
| 5.28  | 6.52 | 2.11 | 3.62 | 1.94 | 未见异常 |             |
| 6.68  | 7.54 | 2.96 | 3.85 | 1.68 | 未见异常 |             |
| 4.22  | 5.36 | 1.50 | 2.77 | 1.53 | 异常   | 轻度脂肪肝       |
| 4.80  | 4.91 | 1.41 | 2.46 | 1.71 | 未见异常 |             |
| 4.83  | 5.11 | 0.76 | 2.16 | 1.81 | 异常   | 1肝内强回声斑：考   |
| 5.18  | 6.39 | 0.84 | 3.54 | 1.75 | 未见异常 |             |
| 5.27  | 5.49 | 1.37 | 2.52 | 2.06 | 异常   | 1、肝多发囊肿；2、  |
| 5.61  | 5.85 | 3.11 | 3.16 | 1.52 | 异常   | 轻度脂肪肝声像 胆   |
| 5.09  | 6.09 | 1.75 | 3.33 | 1.69 | 未见异常 |             |
| 4.70  | 6.46 | 1.06 | 3.80 | 1.65 | 异常   | 1、脂肪肝声像； 2、 |
| 5.28  | 5.22 | 1.28 | 3.21 | 1.23 | 异常   | 脂肪肝声像       |
| 5.87  | 4.99 | 0.67 | 2.82 | 1.71 | 未见异常 |             |
| 4.88  | 6.41 | 0.94 | 3.56 | 1.70 | 异常   | 轻度脂肪肝声像     |
| 7.36  | 5.73 | 2.49 | 3.02 | 1.34 | 异常   | 脂肪肝声像       |
| 15.86 | 6.59 | 2.27 | 4.16 | 1.52 | 异常   | 脂肪肝声像       |
| 5.21  | 5.46 | 2.44 | 2.48 | 1.86 | 未见异常 |             |
| 5.27  | 5.78 | 1.06 | 2.96 | 1.79 | 未见异常 |             |
| 4.68  | 6.39 | 1.49 | 3.27 | 1.83 | 未见异常 |             |
| 5.30  | 4.84 | 0.58 | 2.46 | 1.70 | 异常   | 肝内囊性回声      |
| 5.77  | 6.82 | 1.24 | 3.97 | 1.77 | 未见异常 |             |
| 5.20  | 8.33 | 1.82 | 4.75 | 1.83 | 未见异常 |             |
| 5.04  | 6.72 | 5.68 | 2.13 | 1.28 | 异常   | 肝多发囊肿       |
| 4.49  | 7.04 | 1.57 | 4.33 | 1.80 | 异常   | 脂肪肝声像       |
| 4.53  | 5.41 | 4.08 | 3.00 | 1.45 | 未见异常 |             |
| 5.63  | 5.91 | 5.30 | 2.30 | 1.48 | 异常   | 脂肪肝声像       |
| 5.31  | 5.93 | 1.05 | 3.18 | 1.62 | 未见异常 |             |

|       |      |      |      |      |      |              |
|-------|------|------|------|------|------|--------------|
| 6.63  | 5.03 | 1.75 | 2.39 | 1.86 | 未见异常 |              |
| 6.23  | 6.26 | 1.99 | 3.39 | 1.58 | 异常   | 肝小囊肿         |
| 5.28  | 5.44 | 0.74 | 2.80 | 1.93 | 未见异常 |              |
| 4.50  | 6.81 | 1.27 | 3.47 | 1.93 | 未见异常 |              |
| 5.53  | 7.56 | 3.48 | 3.63 | 1.84 | 异常   | 1、脂肪肝； 2、胆囊  |
| 5.40  | 6.30 | 4.05 | 3.01 | 1.57 | 异常   | 1.脂肪肝声像      |
| 4.56  | 5.25 | 1.31 | 2.80 | 1.60 | 异常   | 肝内强内声斑       |
| 5.66  | 9.24 | 1.59 | 5.94 | 2.10 | 异常   | 1、肝内强回声斑（三   |
| 4.49  | 6.32 | 1.11 | 3.24 | 1.69 | 未见异常 |              |
| 5.08  | 4.91 | 1.01 | 2.17 | 1.52 | 未见异常 |              |
| 6.70  | 7.35 | 4.39 | 3.32 | 1.58 | 异常   | 脂肪肝声像        |
| 4.68  | 4.08 | 2.36 | 1.97 | 1.25 | 异常   | 脂肪肝声像        |
| 5.06  | 5.19 | 1.78 | 2.57 | 1.56 | 未见异常 |              |
| 4.72  | 8.50 | 1.55 | 4.05 | 1.89 | 未见异常 |              |
| 6.64  | 7.80 | 1.59 | 5.14 | 2.03 |      |              |
| 11.77 | 5.66 | 1.94 | 3.09 | 1.65 | 异常   | 1.脂肪肝声像 2.胆囊 |
| 5.11  | 9.06 | 2.54 | 5.20 | 1.95 | 未见异常 |              |
| 5.06  | 4.85 | 1.75 | 2.64 | 1.45 | 未见异常 |              |
| 5.88  | 8.05 | 2.09 | 4.40 | 1.82 | 异常   | 脂肪肝声像        |
| 7.54  | 4.99 | 2.10 | 2.77 | 1.41 | 未见异常 |              |
| 5.30  | 6.92 | 1.54 | 4.20 | 1.67 | 未见异常 |              |
| 5.70  | 7.95 | 1.28 | 5.50 | 1.51 | 异常   | 肝囊肿          |
| 5.16  | 6.48 | 1.53 | 3.51 | 1.93 | 未见异常 |              |
| 5.98  | 5.30 | 2.77 | 2.40 | 1.58 | 未见异常 |              |
| 5.94  | 6.62 | 6.20 | 2.13 | 1.45 |      |              |
| 5.07  | 7.09 | 2.70 | 3.17 | 2.21 | 异常   | 轻度脂肪肝声像。     |
| 5.71  | 5.15 | 1.42 | 3.03 | 1.38 | 异常   | 1、脂肪肝声像      |
| 7.48  | 6.99 | 1.65 | 3.73 | 1.68 | 异常   | 脂肪肝声像。       |
| 4.08  | 5.83 | 1.49 | 3.14 | 1.67 | 未见异常 |              |
| 3.15  | 5.26 | 1.44 | 3.07 | 1.03 | 未见异常 |              |
| 6.16  | 5.91 | 1.60 | 3.05 | 1.70 | 异常   | 肝囊息肉样病变      |
| 5.26  | 5.37 | 1.58 | 2.57 | 2.00 | 未见异常 |              |
| 5.05  | 4.43 | 1.54 | 2.17 | 1.28 | 未见异常 |              |
| 5.51  | 4.90 | 1.01 | 2.62 | 1.44 | 未见异常 |              |
| 5.28  | 5.64 | 1.85 | 3.05 | 1.55 | 未见异常 |              |
| 5.23  | 5.09 | 1.08 | 2.39 | 1.86 | 未见异常 |              |
| 4.49  | 6.21 | 1.71 | 3.66 | 1.47 | 未见异常 |              |
| 6.22  | 6.55 | 1.78 | 3.99 | 1.34 | 未见异常 |              |
| 4.23  | 6.29 | 1.36 | 3.32 | 1.82 | 未见异常 |              |
| 6.73  | 6.95 | 2.65 | 3.72 | 1.48 | 异常   | 肝囊肿          |
| 4.95  | 6.58 | 1.22 | 3.38 | 2.06 | 未见异常 |              |
| 5.55  | 6.78 | 2.49 | 3.48 | 1.80 | 异常   | 轻度脂肪肝，胆囊结    |
| 4.58  | 5.93 | 1.01 | 3.06 | 1.69 | 异常   | 1.肝内强回声斑：考   |
| 5.47  | 4.52 | 1.03 | 2.17 | 1.70 | 未见异常 |              |
| 4.66  | 5.57 | 1.67 | 2.66 | 1.95 | 未见异常 |              |
| 5.87  | 7.02 | 2.04 | 3.98 | 1.68 | 未见异常 |              |
| 7.68  | 6.18 | 5.16 | 2.50 | 1.30 | 未见异常 |              |
| 5.01  | 4.76 | 1.01 | 2.42 | 1.52 | 未见异常 |              |
| 11.11 | 5.17 | 2.16 | 2.69 | 1.46 | 异常   | 1、脂肪肝声像；2、   |
| 5.68  | 4.88 | 2.45 | 2.61 | 1.37 | 异常   | 1.脂肪肝声像 2.肝  |
| 7.53  | 4.26 | 1.35 | 2.13 | 1.53 | 未见异常 |              |

|       |      |       |      |      |      |               |
|-------|------|-------|------|------|------|---------------|
| 4.92  | 5.88 | 1.81  | 3.11 | 1.80 | 未见异常 |               |
| 4.72  | 4.80 | 1.57  | 2.33 | 1.54 | 未见异常 |               |
| 4.47  | 4.90 | 1.32  | 2.12 | 1.73 | 异常   | 胆囊内强回声堆, 考    |
| 5.59  | 5.41 | 1.56  | 3.10 | 1.56 |      |               |
| 5.24  | 4.70 | 0.67  | 2.58 | 1.41 | 未见异常 |               |
| 4.24  | 5.34 | 1.96  | 2.82 | 1.33 | 异常   | 轻度脂肪肝声像       |
| 10.36 | 5.19 | 3.04  | 2.45 | 1.57 | 异常   | 轻度脂肪肝声像       |
| 5.40  | 4.88 | 2.66  | 2.72 | 1.17 | 异常   | 脂肪肝声像         |
| 5.72  | 5.52 | 1.21  | 3.36 | 1.48 | 异常   | 胆囊点状稍高回声,     |
| 5.14  | 3.65 | 1.73  | 1.73 | 1.23 | 异常   | 脂肪肝声像         |
| 5.21  | 5.29 | 1.91  | 2.79 | 1.52 | 异常   | 轻度脂肪肝声像, 胆    |
| 9.32  | 4.68 | 1.40  | 2.18 | 1.67 | 异常   | 胆囊结石          |
| 5.28  | 5.90 | 5.09  | 2.39 | 1.14 | 异常   | 胆囊结石          |
| 6.56  | 4.13 | 2.81  | 1.73 | 1.50 | 未见异常 |               |
| 4.17  | 6.40 | 1.92  | 3.23 | 1.58 | 异常   | 轻度脂肪肝声像       |
| 5.46  | 4.00 | 1.68  | 1.81 | 1.60 | 未见异常 |               |
| 5.66  | 6.66 | 1.35  | 3.83 | 1.54 | 异常   | 肝囊肿           |
| 6.51  | 5.52 | 5.12  | 2.05 | 1.39 | 未见异常 |               |
| 4.59  | 6.47 | 3.30  | 3.74 | 1.37 | 异常   | 1. 脂肪肝声像2. 肝内 |
| 4.39  | 3.46 | 1.95  | 1.50 | 1.30 | 未见异常 |               |
| 5.60  | 5.99 | 1.61  | 3.29 | 1.71 | 未见异常 |               |
| 10.43 | 5.61 | 1.84  | 3.27 | 1.22 | 异常   | 1. 轻度脂肪肝声像 2  |
| 4.69  | 8.76 | 2.00  | 5.34 | 1.37 | 未见异常 |               |
| 5.80  | 6.52 | 1.43  | 3.87 | 1.41 | 异常   | 胆总管扩张、餐后胆     |
| 4.84  | 3.12 | 0.84  | 1.28 | 1.38 | 未见异常 |               |
| 5.10  | 4.79 | 4.39  | 2.02 | 1.03 | 异常   | 轻度脂肪肝声像       |
| 5.56  | 4.81 | 2.10  | 2.44 | 1.33 | 异常   | 轻度脂肪肝声像、胆     |
| 7.84  | 5.93 | 1.17  | 3.52 | 1.50 |      |               |
| 10.14 | 4.31 | 1.64  | 2.24 | 1.36 | 异常   | 1. 脂肪肝声像2. 胆囊 |
| 5.10  | 6.90 | 1.92  | 3.49 | 1.96 | 异常   | 腹部B超: 肝囊肿     |
| 7.95  | 6.54 | 4.49  | 3.22 | 1.34 | 异常   | 脂肪肝声像         |
| 5.26  | 5.63 | 1.63  | 2.97 | 1.81 | 异常   | 脂肪肝声像         |
| 7.35  | 6.95 | 10.75 | 1.26 | 1.12 | 异常   | 轻度脂肪肝声像       |
| 5.42  | 7.03 | 3.94  | 3.61 | 1.33 | 异常   | 脂肪肝           |
| 5.26  | 6.99 | 1.09  | 3.42 | 2.01 | 异常   | 胆囊腔内强回声团块     |
| 6.82  | 5.50 | 7.61  | 1.26 | 1.44 | 异常   | 1、脂肪肝声像; 2、   |
| 5.89  | 6.49 | 1.11  | 3.43 | 2.16 | 异常   | 胆囊结石?         |
| 7.41  | 7.97 | 2.79  | 4.68 | 1.27 | 异常   | 肝胆脾胰B超: 轻度肝   |
| 4.84  | 5.23 | 1.09  | 2.76 | 1.47 | 未见异常 |               |
| 4.61  | 5.61 | 4.18  | 2.85 | 1.81 | 未见异常 |               |
| 5.09  | 5.89 | 1.65  | 3.31 | 1.56 | 异常   | 脂肪肝声像         |
| 5.19  | 4.75 | 6.92  | 1.20 | 1.14 | 未见异常 |               |
| 4.55  | 6.87 | 1.38  | 3.20 | 2.47 | 异常   | 肝多发囊性         |
| 22.14 | 5.83 | 1.31  | 3.09 | 1.61 | 异常   | 胆囊结石          |
| 4.86  | 5.85 | 1.68  | 3.00 | 1.58 | 异常   | 肝内强回声斑: 考虑    |
| 4.58  | 4.52 | 1.76  | 2.31 | 1.40 | 异常   | 轻度脂肪肝声像       |
| 4.59  | 7.05 | 1.28  | 3.66 | 2.21 | 未见异常 |               |
| 6.74  | 5.51 | 1.16  | 2.93 | 1.70 | 异常   | 脂肪肝声像         |
| 5.29  | 5.97 | 1.27  | 3.26 | 1.77 | 异常   | 轻度脂肪肝声像       |
| 5.85  | 4.54 | 2.49  | 2.10 | 1.40 | 未见异常 |               |
| 5.89  | 6.03 | 7.50  | 1.88 | 1.09 | 异常   | 轻度脂肪肝声像       |

|      |      |      |      |      |      |         |
|------|------|------|------|------|------|---------|
| 5.25 | 4.77 | 0.83 | 1.91 | 1.78 | 未见异常 |         |
| 6.87 | 4.39 | 2.23 | 2.20 | 1.21 | 异常   | 脂肪肝声像   |
| 7.98 | 7.65 | 2.32 | 4.32 | 1.55 | 未见异常 |         |
| 7.24 | 7.37 | 2.82 | 4.12 | 1.52 | 异常   | 轻度脂肪肝声像 |
| 5.42 | 5.95 | 1.71 | 2.95 | 1.66 | 未见异常 |         |
| 4.67 | 5.13 | 1.70 | 3.00 | 1.24 | 未见异常 |         |

| WHtR | RFM   | PI    | CI   | LAP    | 身体形态指数 |
|------|-------|-------|------|--------|--------|
| 0.62 | 43.61 | 17.78 | 1.34 | 71.06  | 0.0848 |
| 0.60 | 42.89 | 16.57 | 1.36 | 58.24  | 0.0870 |
| 0.66 | 45.83 | 17.35 | 1.46 | 52.77  | 0.0929 |
| 0.58 | 41.35 | 17.53 | 1.26 | 77.28  | 0.0800 |
| 0.61 | 43.25 | 18.14 | 1.32 | 39.60  | 0.0828 |
| 0.62 | 43.53 | 16.56 | 1.39 | 45.15  | 0.0885 |
| 0.62 | 43.59 | 19.98 | 1.27 | 36.25  | 0.0791 |
| 0.62 | 43.68 | 16.46 | 1.40 | 106.19 | 0.0884 |
| 0.60 | 42.88 | 18.62 | 1.28 | 77.70  | 0.0800 |
| 0.63 | 44.27 | 18.70 | 1.34 | 62.00  | 0.0831 |
| 0.59 | 42.02 | 17.87 | 1.28 | 66.50  | 0.0798 |
| 0.54 | 39.26 | 15.59 | 1.26 | 92.68  | 0.0808 |
| 0.53 | 38.41 | 14.01 | 1.30 | 68.50  | 0.0850 |
| 0.71 | 47.75 | 23.37 | 1.34 | 285.30 | 0.0813 |
| 0.54 | 38.93 | 16.52 | 1.22 | 41.28  | 0.0776 |
| 0.58 | 41.71 | 16.38 | 1.32 | 127.71 | 0.0840 |
| 0.68 | 46.69 | 19.13 | 1.43 | 59.77  | 0.0894 |
| 0.63 | 44.00 | 17.11 | 1.39 | 68.80  | 0.0886 |
| 0.65 | 45.39 | 22.22 | 1.27 | 53.20  | 0.0773 |
| 0.61 | 43.42 | 17.24 | 1.36 | 106.86 | 0.0852 |
| 0.68 | 46.77 | 20.79 | 1.38 | 117.76 | 0.0844 |
| 0.57 | 41.06 | 16.24 | 1.30 | 39.75  | 0.0839 |
| 0.59 | 41.85 | 16.40 | 1.33 | 38.64  | 0.0858 |
| 0.58 | 41.56 | 15.84 | 1.34 | 112.32 | 0.0856 |
| 0.59 | 42.21 | 18.57 | 1.26 | 85.84  | 0.0791 |
| 0.61 | 43.39 | 19.47 | 1.28 | 94.52  | 0.0792 |
| 0.61 | 43.37 | 18.66 | 1.30 | 117.29 | 0.0810 |
| 0.54 | 38.86 | 16.46 | 1.22 | 68.90  | 0.0773 |
| 0.61 | 43.45 | 17.31 | 1.35 | 641.88 | 0.0855 |
| 0.61 | 43.45 | 17.31 | 1.35 | 30.24  | 0.0855 |
| 0.64 | 44.75 | 20.68 | 1.29 | 52.06  | 0.0794 |
| 0.56 | 40.44 | 15.14 | 1.33 | 123.20 | 0.0850 |
| 0.60 | 42.81 | 16.57 | 1.36 | 81.72  | 0.0861 |
| 0.56 | 40.00 | 15.91 | 1.28 | 50.22  | 0.0818 |
| 0.62 | 43.77 | 18.52 | 1.32 | 71.64  | 0.0827 |
| 0.62 | 43.84 | 18.44 | 1.33 | 206.70 | 0.0827 |
| 0.47 | 33.43 | 12.70 | 1.21 | 26.04  | 0.0808 |
| 0.66 | 45.70 | 20.66 | 1.33 | 86.43  | 0.0817 |
| 0.62 | 43.53 | 16.99 | 1.37 | 92.05  | 0.0870 |
| 0.53 | 37.93 | 15.34 | 1.23 | 86.25  | 0.0789 |
| 0.72 | 48.04 | 22.36 | 1.39 | 93.00  | 0.0841 |
| 0.71 | 47.81 | 20.05 | 1.45 | 63.92  | 0.0901 |
| 0.47 | 33.08 | 14.15 | 1.14 | 65.80  | 0.0741 |
| 0.56 | 40.43 | 14.24 | 1.37 | 79.80  | 0.0888 |
| 0.60 | 42.74 | 17.24 | 1.33 | 286.38 | 0.0835 |
| 0.52 | 37.79 | 15.12 | 1.24 | 40.60  | 0.0801 |
| 0.61 | 43.37 | 16.73 | 1.37 | 68.08  | 0.0871 |
| 0.59 | 42.22 | 17.65 | 1.29 | 52.16  | 0.0814 |
| 0.59 | 42.14 | 18.44 | 1.26 | 41.40  | 0.0792 |
| 0.58 | 41.45 | 17.80 | 1.26 | 45.30  | 0.0792 |

|      |       |       |      |        |        |
|------|-------|-------|------|--------|--------|
| 0.58 | 41.78 | 17.39 | 1.29 | 57.28  | 0.0810 |
| 0.51 | 37.03 | 13.58 | 1.28 | 28.40  | 0.0841 |
| 0.63 | 44.30 | 19.35 | 1.32 | 51.12  | 0.0819 |
| 0.58 | 41.62 | 16.75 | 1.30 | 38.44  | 0.0828 |
| 0.55 | 39.81 | 14.81 | 1.32 | 81.90  | 0.0855 |
| 0.62 | 43.73 | 16.33 | 1.41 | 79.56  | 0.0894 |
| 0.57 | 40.83 | 16.75 | 1.27 | 54.52  | 0.0809 |
| 0.61 | 43.47 | 17.89 | 1.33 | 62.70  | 0.0842 |
| 0.53 | 38.17 | 15.25 | 1.24 | 22.75  | 0.0797 |
| 0.57 | 41.00 | 16.43 | 1.29 | 57.60  | 0.0823 |
| 0.62 | 43.74 | 17.19 | 1.37 | 100.10 | 0.0870 |
| 0.60 | 42.71 | 18.20 | 1.29 | 42.93  | 0.0819 |
| 0.61 | 43.37 | 16.27 | 1.39 | 76.22  | 0.0887 |
| 0.57 | 40.65 | 15.66 | 1.31 | 205.52 | 0.0843 |
| 0.63 | 44.13 | 18.04 | 1.36 | 89.43  | 0.0858 |
| 0.64 | 44.57 | 18.89 | 1.34 | 130.80 | 0.0835 |
| 0.56 | 40.60 | 15.61 | 1.31 | 34.22  | 0.0842 |
| 0.59 | 42.36 | 17.49 | 1.30 | 39.30  | 0.0827 |
| 0.57 | 40.72 | 13.44 | 1.42 | 34.41  | 0.0930 |
| 0.57 | 40.76 | 19.19 | 1.19 | 50.64  | 0.0745 |
| 0.61 | 43.28 | 15.40 | 1.43 | 145.52 | 0.0922 |
| 0.48 | 34.44 | 12.94 | 1.23 | 34.96  | 0.0807 |
| 0.58 | 41.62 | 15.36 | 1.36 | 146.63 | 0.0877 |
| 0.59 | 41.93 | 17.99 | 1.27 | 50.49  | 0.0795 |
| 0.54 | 38.73 | 16.55 | 1.21 | 78.00  | 0.0761 |
| 0.62 | 43.87 | 16.85 | 1.39 | 45.00  | 0.0884 |
| 0.57 | 40.68 | 15.52 | 1.32 | 123.12 | 0.0836 |
| 0.54 | 39.25 | 15.82 | 1.26 | 44.88  | 0.0810 |
| 0.64 | 44.72 | 21.41 | 1.27 | 95.40  | 0.0778 |
| 0.63 | 44.26 | 19.92 | 1.30 | 102.68 | 0.0805 |
| 0.64 | 44.91 | 18.81 | 1.36 | 62.56  | 0.0857 |
| 0.64 | 44.62 | 18.78 | 1.35 | 64.44  | 0.0846 |
| 0.55 | 39.37 | 15.58 | 1.27 | 38.75  | 0.0816 |
| 0.59 | 41.93 | 15.09 | 1.39 | 66.00  | 0.0894 |
| 0.59 | 42.07 | 17.11 | 1.31 | 169.88 | 0.0829 |
| 0.61 | 43.25 | 16.93 | 1.36 | 25.74  | 0.0867 |
| 0.74 | 48.98 | 22.45 | 1.43 | 241.92 | 0.0865 |
| 0.56 | 40.37 | 14.50 | 1.35 | 54.23  | 0.0877 |
| 0.74 | 49.08 | 22.96 | 1.42 | 49.22  | 0.0870 |
| 0.57 | 40.67 | 17.66 | 1.24 | 46.40  | 0.0773 |
| 0.59 | 42.11 | 15.58 | 1.37 | 67.34  | 0.0874 |
| 0.63 | 44.40 | 20.03 | 1.30 | 54.36  | 0.0803 |
| 0.68 | 46.77 | 20.50 | 1.39 | 69.00  | 0.0852 |
| 0.54 | 39.08 | 14.40 | 1.31 | 47.20  | 0.0861 |
| 0.60 | 42.63 | 19.30 | 1.25 | 106.08 | 0.0776 |
| 0.58 | 41.56 | 16.92 | 1.30 | 82.24  | 0.0819 |
| 0.50 | 36.13 | 13.60 | 1.25 | 57.19  | 0.0820 |
| 0.59 | 42.00 | 17.31 | 1.30 | 164.80 | 0.0819 |
| 0.55 | 39.75 | 14.69 | 1.32 | 30.00  | 0.0851 |
| 0.54 | 38.65 | 13.70 | 1.33 | 73.00  | 0.0870 |
| 0.60 | 42.74 | 14.88 | 1.43 | 33.29  | 0.0923 |

|      |       |       |      |        |        |
|------|-------|-------|------|--------|--------|
| 0.58 | 41.40 | 16.08 | 1.32 | 135.72 | 0.0848 |
| 0.56 | 40.29 | 15.56 | 1.30 | 99.32  | 0.0840 |
| 0.60 | 42.52 | 15.61 | 1.39 | 85.68  | 0.0890 |
| 0.62 | 43.96 | 17.08 | 1.39 | 47.25  | 0.0881 |
| 0.63 | 44.33 | 18.79 | 1.34 | 104.50 | 0.0833 |
| 0.52 | 37.46 | 15.72 | 1.20 | 47.04  | 0.0766 |
| 0.59 | 42.26 | 18.66 | 1.26 | 63.69  | 0.0784 |
| 0.54 | 39.04 | 15.62 | 1.26 | 35.07  | 0.0813 |
| 0.57 | 41.12 | 15.75 | 1.33 | 93.80  | 0.0853 |
| 0.53 | 38.59 | 14.43 | 1.29 | 110.43 | 0.0835 |
| 0.61 | 43.10 | 17.87 | 1.32 | 89.60  | 0.0828 |
| 0.60 | 42.44 | 16.85 | 1.33 | 100.80 | 0.0847 |
| 0.79 | 50.70 | 26.84 | 1.40 | 115.64 | 0.0826 |
| 0.57 | 40.69 | 18.69 | 1.20 | 121.21 | 0.0758 |
| 0.69 | 47.11 | 19.76 | 1.43 | 73.00  | 0.0880 |
| 0.53 | 38.22 | 16.75 | 1.19 | 62.33  | 0.0753 |
| 0.59 | 41.91 | 16.00 | 1.35 | 79.20  | 0.0864 |
| 0.61 | 43.42 | 15.97 | 1.41 | 354.90 | 0.0897 |
| 0.52 | 37.54 | 14.52 | 1.25 | 39.20  | 0.0817 |
| 0.59 | 41.98 | 16.66 | 1.32 | 106.72 | 0.0844 |
| 0.61 | 43.45 | 17.05 | 1.37 | 122.32 | 0.0852 |
| 0.53 | 38.44 | 13.42 | 1.33 | 42.00  | 0.0878 |
| 0.52 | 37.28 | 15.10 | 1.22 | 75.80  | 0.0789 |
| 0.55 | 39.81 | 16.80 | 1.24 | 48.62  | 0.0786 |
| 0.68 | 46.39 | 20.62 | 1.36 | 69.52  | 0.0839 |
| 0.60 | 42.74 | 15.73 | 1.39 | 157.79 | 0.0897 |
| 0.59 | 42.36 | 16.66 | 1.34 | 177.90 | 0.0854 |
| 0.58 | 41.52 | 14.52 | 1.40 | 62.06  | 0.0911 |
| 0.67 | 46.28 | 19.40 | 1.40 | 91.14  | 0.0863 |
| 0.68 | 46.40 | 21.59 | 1.33 | 106.26 | 0.0816 |
| 0.50 | 36.26 | 14.64 | 1.21 | 26.80  | 0.0782 |
| 0.61 | 43.02 | 17.45 | 1.33 | 44.64  | 0.0838 |
| 0.59 | 41.88 | 17.38 | 1.29 | 19.98  | 0.0821 |
| 0.55 | 39.86 | 14.68 | 1.33 | 68.40  | 0.0855 |
| 0.61 | 43.25 | 19.35 | 1.27 | 324.39 | 0.0793 |
| 0.52 | 37.50 | 16.43 | 1.18 | 47.08  | 0.0748 |
| 0.56 | 40.24 | 16.23 | 1.27 | 43.47  | 0.0814 |
| 0.52 | 37.73 | 15.31 | 1.23 | 61.64  | 0.0788 |
| 0.71 | 47.84 | 19.68 | 1.47 | 39.60  | 0.0916 |
| 0.65 | 45.29 | 21.84 | 1.28 | 139.40 | 0.0777 |
| 0.65 | 45.25 | 20.86 | 1.31 | 41.30  | 0.0809 |
| 0.55 | 39.53 | 15.04 | 1.30 | 95.04  | 0.0837 |
| 0.54 | 38.86 | 14.22 | 1.31 | 41.34  | 0.0852 |
| 0.59 | 42.05 | 17.35 | 1.30 | 68.32  | 0.0825 |
| 0.66 | 45.69 | 19.83 | 1.36 | 306.15 | 0.0845 |
| 0.66 | 45.56 | 23.33 | 1.25 | 60.80  | 0.0763 |
| 0.63 | 44.00 | 17.43 | 1.37 | 68.08  | 0.0867 |
| 0.61 | 43.47 | 17.89 | 1.33 | 123.42 | 0.0842 |
| 0.59 | 41.96 | 20.26 | 1.20 | 46.08  | 0.0731 |
| 0.65 | 45.15 | 18.04 | 1.40 | 71.28  | 0.0886 |
| 0.55 | 39.72 | 17.12 | 1.22 | 72.80  | 0.0771 |

|      |       |       |      |        |        |
|------|-------|-------|------|--------|--------|
| 0.57 | 40.94 | 14.75 | 1.36 | 55.80  | 0.0881 |
| 0.74 | 48.86 | 18.65 | 1.57 | 59.40  | 0.0977 |
| 0.60 | 42.60 | 17.83 | 1.30 | 62.64  | 0.0814 |
| 0.65 | 45.33 | 18.83 | 1.38 | 30.69  | 0.0874 |
| 0.56 | 40.24 | 14.81 | 1.33 | 161.73 | 0.0865 |
| 0.49 | 35.21 | 14.50 | 1.18 | 37.80  | 0.0766 |
| 0.59 | 41.96 | 14.40 | 1.42 | 80.64  | 0.0918 |
| 0.58 | 41.62 | 15.08 | 1.37 | 62.00  | 0.0888 |
| 0.47 | 33.81 | 14.24 | 1.15 | 19.05  | 0.0751 |
| 0.66 | 45.48 | 16.69 | 1.47 | 59.67  | 0.0940 |
| 0.52 | 37.48 | 15.01 | 1.23 | 41.17  | 0.0792 |
| 0.62 | 43.71 | 15.17 | 1.46 | 67.64  | 0.0939 |
| 0.70 | 47.24 | 21.20 | 1.39 | 97.76  | 0.0847 |
| 0.68 | 46.40 | 17.89 | 1.47 | 132.30 | 0.0925 |
| 0.56 | 40.09 | 14.96 | 1.32 | 63.90  | 0.0850 |
| 0.59 | 42.35 | 17.78 | 1.29 | 65.61  | 0.0822 |
| 0.58 | 41.49 | 16.28 | 1.32 | 69.63  | 0.0837 |
| 0.67 | 46.10 | 20.67 | 1.35 | 78.75  | 0.0826 |
| 0.55 | 39.64 | 14.89 | 1.31 | 36.60  | 0.0840 |
| 0.55 | 39.81 | 15.09 | 1.31 | 33.80  | 0.0844 |
| 0.58 | 41.65 | 13.82 | 1.44 | 51.84  | 0.0949 |
| 0.59 | 42.22 | 16.52 | 1.34 | 54.08  | 0.0852 |
| 0.65 | 45.07 | 17.19 | 1.43 | 52.65  | 0.0908 |
| 0.55 | 39.41 | 15.26 | 1.28 | 41.04  | 0.0830 |
| 0.64 | 44.57 | 17.80 | 1.38 | 38.40  | 0.0869 |
| 0.69 | 47.15 | 21.04 | 1.39 | 36.80  | 0.0850 |
| 0.64 | 44.82 | 19.40 | 1.34 | 154.44 | 0.0822 |
| 0.66 | 45.78 | 22.82 | 1.27 | 92.48  | 0.0782 |
| 0.55 | 39.76 | 16.98 | 1.23 | 74.25  | 0.0778 |
| 0.57 | 40.77 | 16.38 | 1.29 | 59.40  | 0.0818 |
| 0.59 | 42.02 | 16.61 | 1.33 | 92.40  | 0.0838 |
| 0.58 | 41.27 | 15.97 | 1.32 | 124.08 | 0.0841 |
| 0.55 | 39.33 | 14.51 | 1.31 | 33.02  | 0.0853 |
| 0.57 | 40.89 | 15.72 | 1.32 | 70.08  | 0.0841 |
| 0.57 | 40.76 | 15.42 | 1.33 | 24.44  | 0.0858 |
| 0.56 | 40.42 | 18.57 | 1.20 | 63.00  | 0.0747 |
| 0.57 | 40.94 | 16.78 | 1.28 | 93.42  | 0.0814 |
| 0.65 | 45.25 | 20.14 | 1.33 | 95.90  | 0.0828 |
| 0.63 | 44.30 | 20.25 | 1.29 | 55.08  | 0.0794 |
| 0.51 | 36.50 | 13.99 | 1.24 | 58.74  | 0.0808 |
| 0.58 | 41.36 | 15.93 | 1.33 | 36.00  | 0.0850 |
| 0.58 | 41.71 | 16.07 | 1.34 | 101.97 | 0.0851 |
| 0.54 | 39.29 | 16.86 | 1.22 | 56.16  | 0.0770 |
| 0.54 | 38.75 | 16.63 | 1.21 | 46.42  | 0.0771 |
| 0.60 | 42.67 | 17.48 | 1.32 | 61.76  | 0.0833 |
| 0.59 | 41.91 | 17.30 | 1.29 | 222.90 | 0.0820 |
| 0.52 | 37.27 | 13.12 | 1.31 | 242.55 | 0.0865 |
| 0.59 | 41.83 | 14.74 | 1.40 | 46.74  | 0.0897 |
| 0.68 | 46.40 | 20.05 | 1.38 | 65.52  | 0.0858 |
| 0.55 | 39.57 | 15.08 | 1.30 | 53.04  | 0.0838 |
| 0.62 | 43.84 | 18.44 | 1.33 | 56.55  | 0.0827 |

|      |       |       |      |        |        |
|------|-------|-------|------|--------|--------|
| 0.63 | 44.00 | 20.79 | 1.26 | 78.44  | 0.0771 |
| 0.61 | 43.19 | 19.28 | 1.27 | 48.98  | 0.0796 |
| 0.60 | 42.82 | 21.94 | 1.18 | 71.01  | 0.0726 |
| 0.61 | 43.23 | 19.17 | 1.28 | 60.12  | 0.0793 |
| 0.68 | 46.39 | 22.92 | 1.29 | 93.72  | 0.0782 |
| 0.59 | 42.05 | 16.71 | 1.32 | 197.68 | 0.0846 |
| 0.59 | 42.36 | 16.04 | 1.36 | 85.80  | 0.0876 |
| 0.58 | 41.78 | 17.66 | 1.28 | 36.16  | 0.0802 |
| 0.55 | 39.49 | 14.99 | 1.30 | 53.48  | 0.0836 |
| 0.69 | 47.03 | 21.21 | 1.38 | 67.62  | 0.0837 |
| 0.58 | 41.56 | 17.11 | 1.29 | 45.12  | 0.0813 |
| 0.57 | 40.83 | 16.19 | 1.30 | 23.49  | 0.0828 |
| 0.55 | 39.76 | 18.62 | 1.17 | 117.45 | 0.0731 |
| 0.62 | 43.66 | 17.37 | 1.36 | 140.04 | 0.0860 |
| 0.65 | 45.40 | 18.15 | 1.41 | 186.90 | 0.0882 |
| 0.55 | 39.56 | 14.28 | 1.33 | 206.40 | 0.0859 |
| 0.61 | 43.45 | 18.15 | 1.32 | 97.20  | 0.0829 |
| 0.67 | 46.20 | 18.70 | 1.42 | 85.20  | 0.0895 |
| 0.63 | 44.26 | 17.99 | 1.36 | 47.26  | 0.0862 |
| 0.66 | 45.60 | 18.22 | 1.41 | 86.10  | 0.0886 |
| 0.74 | 48.99 | 21.30 | 1.47 | 202.37 | 0.0893 |
| 0.52 | 37.58 | 13.50 | 1.30 | 75.42  | 0.0862 |
| 0.61 | 43.44 | 18.22 | 1.32 | 38.72  | 0.0832 |
| 0.72 | 48.14 | 22.65 | 1.38 | 88.56  | 0.0833 |
| 0.59 | 41.91 | 16.98 | 1.31 | 51.00  | 0.0830 |
| 0.57 | 40.94 | 17.95 | 1.24 | 50.22  | 0.0773 |
| 0.53 | 38.05 | 14.19 | 1.28 | 21.40  | 0.0842 |
| 0.57 | 40.61 | 14.33 | 1.37 | 57.66  | 0.0888 |
| 0.65 | 45.22 | 17.83 | 1.41 | 88.00  | 0.0883 |
| 0.54 | 39.00 | 14.50 | 1.30 | 143.22 | 0.0852 |
| 0.68 | 46.40 | 20.67 | 1.36 | 101.64 | 0.0840 |
| 0.60 | 42.70 | 15.05 | 1.42 | 95.40  | 0.0914 |
| 0.63 | 44.17 | 19.13 | 1.32 | 47.60  | 0.0823 |
| 0.52 | 37.30 | 16.48 | 1.17 | 29.07  | 0.0747 |
| 0.60 | 42.67 | 16.00 | 1.38 | 41.92  | 0.0883 |
| 0.56 | 40.15 | 17.00 | 1.24 | 59.52  | 0.0791 |
| 0.51 | 36.75 | 14.47 | 1.23 | 64.46  | 0.0796 |
| 0.67 | 46.10 | 19.12 | 1.40 | 95.88  | 0.0868 |
| 0.59 | 42.35 | 17.85 | 1.29 | 45.36  | 0.0820 |
| 0.58 | 41.62 | 18.15 | 1.25 | 79.67  | 0.0785 |
| 0.58 | 41.45 | 15.38 | 1.35 | 54.30  | 0.0873 |
| 0.58 | 41.68 | 14.78 | 1.39 | 52.54  | 0.0892 |
| 0.55 | 39.82 | 15.10 | 1.31 | 40.30  | 0.0836 |
| 0.62 | 43.66 | 18.51 | 1.32 | 117.00 | 0.0824 |
| 0.50 | 36.00 | 13.69 | 1.24 | 37.43  | 0.0813 |
| 0.62 | 43.55 | 14.93 | 1.46 | 92.00  | 0.0941 |
| 0.53 | 38.08 | 16.39 | 1.20 | 34.20  | 0.0767 |
| 0.59 | 42.02 | 15.72 | 1.36 | 81.20  | 0.0869 |
| 0.57 | 41.00 | 15.61 | 1.33 | 76.80  | 0.0852 |
| 0.50 | 36.26 | 13.68 | 1.25 | 61.56  | 0.0820 |
| 0.58 | 41.33 | 15.28 | 1.35 | 35.20  | 0.0870 |

|      |       |       |      |        |        |
|------|-------|-------|------|--------|--------|
| 0.62 | 43.84 | 18.18 | 1.34 | 243.75 | 0.0835 |
| 0.67 | 46.31 | 20.09 | 1.38 | 35.49  | 0.0858 |
| 0.63 | 44.04 | 19.68 | 1.29 | 135.32 | 0.0805 |
| 0.65 | 45.03 | 21.43 | 1.28 | 59.85  | 0.0788 |
| 0.61 | 43.45 | 17.59 | 1.34 | 84.60  | 0.0846 |
| 0.62 | 43.63 | 18.35 | 1.32 | 76.44  | 0.0824 |
| 0.66 | 45.48 | 18.51 | 1.40 | 79.95  | 0.0877 |
| 0.60 | 42.90 | 17.13 | 1.34 | 310.96 | 0.0861 |
| 0.61 | 43.03 | 16.30 | 1.38 | 60.39  | 0.0882 |
| 0.56 | 40.39 | 15.58 | 1.31 | 117.84 | 0.0845 |
| 0.64 | 44.52 | 21.34 | 1.26 | 109.20 | 0.0782 |
| 0.57 | 41.06 | 17.09 | 1.27 | 33.35  | 0.0805 |
| 0.58 | 41.65 | 16.10 | 1.33 | 57.80  | 0.0846 |
| 0.63 | 44.04 | 16.65 | 1.41 | 99.45  | 0.0892 |
| 0.62 | 43.92 | 17.41 | 1.37 | 48.16  | 0.0857 |
| 0.65 | 45.01 | 17.92 | 1.40 | 52.46  | 0.0875 |
| 0.57 | 40.88 | 16.08 | 1.30 | 73.44  | 0.0841 |
| 0.61 | 43.02 | 17.72 | 1.32 | 75.24  | 0.0829 |
| 0.56 | 40.04 | 15.87 | 1.28 | 105.40 | 0.0814 |
| 0.59 | 42.22 | 15.38 | 1.39 | 58.88  | 0.0893 |
| 0.57 | 41.17 | 18.46 | 1.23 | 53.07  | 0.0767 |
| 0.57 | 40.71 | 17.29 | 1.25 | 23.49  | 0.0789 |
| 0.58 | 41.71 | 15.30 | 1.37 | 40.26  | 0.0879 |
| 0.58 | 41.56 | 16.65 | 1.31 | 31.36  | 0.0828 |
| 0.64 | 44.63 | 18.14 | 1.37 | 88.43  | 0.0864 |
| 0.58 | 41.34 | 17.31 | 1.27 | 29.10  | 0.0804 |
| 0.76 | 49.81 | 25.29 | 1.39 | 95.70  | 0.0830 |
| 0.47 | 33.06 | 17.67 | 1.02 | 22.10  | 0.0645 |
| 0.59 | 41.84 | 18.22 | 1.26 | 52.08  | 0.0789 |
| 0.61 | 43.33 | 18.26 | 1.31 | 54.08  | 0.0828 |
| 0.64 | 44.91 | 16.81 | 1.44 | 81.47  | 0.0918 |
| 0.62 | 43.53 | 17.51 | 1.35 | 48.36  | 0.0847 |
| 0.63 | 44.39 | 18.57 | 1.35 | 118.30 | 0.0846 |
| 0.47 | 33.53 | 13.43 | 1.18 | 18.30  | 0.0775 |
| 0.72 | 48.36 | 21.64 | 1.43 | 333.84 | 0.0869 |
| 0.61 | 43.03 | 15.56 | 1.41 | 150.48 | 0.0910 |
| 0.66 | 45.47 | 18.58 | 1.39 | 148.37 | 0.0878 |
| 0.59 | 41.91 | 17.19 | 1.30 | 59.10  | 0.0823 |
| 0.52 | 37.71 | 16.02 | 1.20 | 36.48  | 0.0762 |
| 0.63 | 44.13 | 16.89 | 1.40 | 64.02  | 0.0896 |
| 0.60 | 42.44 | 16.87 | 1.33 | 25.23  | 0.0851 |
| 0.69 | 46.96 | 20.91 | 1.38 | 881.82 | 0.0847 |
| 0.55 | 39.41 | 14.22 | 1.33 | 102.24 | 0.0871 |
| 0.51 | 37.00 | 13.70 | 1.27 | 36.96  | 0.0832 |
| 0.56 | 40.32 | 15.25 | 1.32 | 56.70  | 0.0846 |
| 0.53 | 38.00 | 14.52 | 1.27 | 149.60 | 0.0825 |
| 0.61 | 43.32 | 19.12 | 1.28 | 31.20  | 0.0815 |
| 0.52 | 37.69 | 14.18 | 1.27 | 83.25  | 0.0825 |
| 0.58 | 41.68 | 16.70 | 1.31 | 55.80  | 0.0833 |
| 0.63 | 44.12 | 17.25 | 1.39 | 61.49  | 0.0868 |
| 0.50 | 35.74 | 13.96 | 1.22 | 58.50  | 0.0798 |

|      |       |       |      |        |        |
|------|-------|-------|------|--------|--------|
| 0.60 | 42.74 | 17.39 | 1.32 | 103.70 | 0.0834 |
| 0.67 | 46.00 | 19.54 | 1.38 | 99.88  | 0.0856 |
| 0.73 | 48.73 | 20.74 | 1.48 | 60.84  | 0.0908 |
| 0.72 | 48.36 | 19.65 | 1.50 | 41.08  | 0.0927 |
| 0.69 | 46.82 | 18.81 | 1.45 | 58.80  | 0.0913 |
| 0.67 | 46.10 | 21.49 | 1.32 | 82.56  | 0.0808 |
| 0.63 | 44.30 | 20.86 | 1.27 | 39.60  | 0.0779 |
| 0.58 | 41.78 | 16.57 | 1.32 | 51.84  | 0.0837 |
| 0.58 | 41.54 | 16.32 | 1.32 | 62.56  | 0.0835 |
| 0.60 | 42.52 | 18.14 | 1.29 | 44.64  | 0.0810 |
| 0.62 | 43.69 | 18.57 | 1.32 | 79.86  | 0.0828 |
| 0.64 | 44.98 | 17.65 | 1.41 | 90.40  | 0.0887 |
| 0.61 | 43.19 | 19.92 | 1.25 | 93.62  | 0.0779 |
| 0.65 | 45.40 | 21.22 | 1.30 | 165.90 | 0.0794 |
| 0.60 | 42.74 | 18.01 | 1.30 | 121.38 | 0.0815 |
| 0.61 | 43.23 | 18.62 | 1.30 | 47.52  | 0.0809 |
| 0.62 | 43.77 | 18.41 | 1.33 | 74.88  | 0.0831 |
| 0.55 | 39.86 | 15.70 | 1.28 | 73.75  | 0.0825 |
| 0.73 | 48.45 | 22.81 | 1.39 | 57.60  | 0.0847 |
| 0.58 | 41.65 | 19.28 | 1.22 | 59.40  | 0.0760 |
| 0.55 | 39.46 | 16.81 | 1.22 | 103.96 | 0.0781 |
| 0.69 | 47.03 | 19.87 | 1.42 | 132.30 | 0.0875 |
| 0.73 | 48.52 | 23.61 | 1.37 | 176.40 | 0.0829 |
| 0.70 | 47.31 | 21.48 | 1.38 | 51.25  | 0.0851 |
| 0.64 | 44.70 | 23.44 | 1.21 | 68.00  | 0.0734 |
| 0.69 | 46.82 | 18.43 | 1.46 | 94.00  | 0.0925 |
| 0.68 | 46.78 | 21.46 | 1.36 | 290.84 | 0.0829 |
| 0.57 | 40.71 | 17.19 | 1.25 | 45.36  | 0.0795 |
| 0.72 | 48.08 | 22.47 | 1.39 | 195.22 | 0.0849 |
| 0.60 | 42.74 | 18.35 | 1.29 | 55.49  | 0.0810 |
| 0.67 | 46.00 | 19.76 | 1.38 | 83.26  | 0.0847 |
| 0.64 | 44.51 | 18.82 | 1.34 | 158.40 | 0.0841 |
| 0.70 | 47.49 | 22.77 | 1.35 | 33.11  | 0.0822 |
| 0.67 | 46.10 | 20.67 | 1.35 | 144.29 | 0.0824 |
| 0.58 | 41.78 | 17.80 | 1.27 | 46.72  | 0.0798 |
| 0.58 | 41.54 | 18.81 | 1.23 | 18.25  | 0.0773 |
| 0.55 | 39.56 | 15.87 | 1.26 | 64.00  | 0.0800 |
| 0.58 | 41.41 | 18.57 | 1.23 | 45.63  | 0.0773 |
| 0.64 | 44.79 | 22.35 | 1.24 | 43.23  | 0.0762 |
| 0.57 | 40.83 | 16.75 | 1.27 | 27.26  | 0.0809 |
| 0.60 | 42.52 | 16.98 | 1.33 | 116.28 | 0.0842 |
| 0.72 | 48.19 | 25.55 | 1.31 | 71.44  | 0.0778 |
| 0.56 | 40.32 | 16.02 | 1.28 | 85.80  | 0.0818 |
| 0.51 | 36.99 | 13.18 | 1.30 | 196.88 | 0.0851 |
| 0.62 | 43.67 | 20.07 | 1.27 | 27.34  | 0.0778 |
| 0.60 | 42.45 | 19.23 | 1.25 | 68.95  | 0.0771 |
| 0.58 | 41.61 | 18.19 | 1.25 | 36.48  | 0.0794 |
| 0.65 | 45.22 | 20.16 | 1.33 | 62.48  | 0.0814 |
| 0.63 | 44.26 | 21.53 | 1.25 | 65.62  | 0.0765 |
| 0.77 | 49.91 | 25.19 | 1.40 | 116.28 | 0.0834 |
| 0.59 | 42.21 | 19.20 | 1.24 | 26.68  | 0.0774 |

|      |       |       |      |        |        |
|------|-------|-------|------|--------|--------|
| 0.71 | 48.00 | 23.27 | 1.36 | 149.24 | 0.0815 |
| 0.54 | 38.76 | 14.94 | 1.27 | 99.18  | 0.0817 |
| 0.63 | 44.30 | 22.07 | 1.23 | 119.52 | 0.0750 |
| 0.52 | 37.75 | 15.91 | 1.20 | 38.50  | 0.0770 |
| 0.59 | 41.91 | 17.19 | 1.30 | 71.10  | 0.0823 |
| 0.64 | 44.78 | 18.43 | 1.37 | 106.00 | 0.0855 |
| 0.61 | 42.96 | 17.94 | 1.31 | 48.96  | 0.0824 |
| 0.67 | 46.00 | 22.89 | 1.28 | 80.96  | 0.0770 |
| 0.62 | 43.72 | 18.78 | 1.31 | 86.70  | 0.0821 |
| 0.59 | 42.22 | 15.09 | 1.40 | 94.40  | 0.0904 |
| 0.57 | 40.94 | 17.23 | 1.26 | 17.82  | 0.0800 |
| 0.57 | 40.94 | 15.01 | 1.35 | 99.82  | 0.0871 |
| 0.61 | 43.44 | 18.22 | 1.32 | 116.76 | 0.0839 |
| 0.61 | 43.47 | 17.89 | 1.33 | 92.73  | 0.0842 |
| 0.67 | 46.19 | 18.51 | 1.43 | 40.80  | 0.0889 |
| 0.53 | 38.03 | 14.96 | 1.25 | 21.63  | 0.0811 |
| 0.64 | 44.67 | 16.87 | 1.43 | 49.92  | 0.0916 |
| 0.60 | 42.88 | 16.17 | 1.38 | 57.00  | 0.0874 |
| 0.61 | 43.25 | 20.56 | 1.24 | 177.87 | 0.0762 |
| 0.54 | 38.86 | 17.04 | 1.20 | 179.14 | 0.0755 |
| 0.64 | 44.98 | 16.23 | 1.47 | 95.60  | 0.0938 |
| 0.50 | 35.75 | 15.18 | 1.17 | 28.35  | 0.0750 |
| 0.50 | 36.00 | 15.88 | 1.15 | 41.99  | 0.0736 |
| 0.66 | 45.49 | 20.19 | 1.34 | 51.25  | 0.0826 |
| 0.57 | 41.18 | 14.50 | 1.38 | 153.09 | 0.0905 |
| 0.61 | 43.35 | 19.04 | 1.29 | 34.40  | 0.0794 |
| 0.56 | 40.44 | 17.75 | 1.22 | 79.35  | 0.0778 |
| 0.53 | 38.39 | 14.05 | 1.30 | 45.60  | 0.0839 |
| 0.67 | 46.21 | 21.20 | 1.34 | 74.86  | 0.0826 |
| 0.55 | 39.33 | 14.24 | 1.33 | 112.06 | 0.0864 |
| 0.64 | 44.66 | 18.57 | 1.36 | 84.24  | 0.0849 |
| 0.55 | 39.33 | 16.25 | 1.24 | 45.44  | 0.0782 |
| 0.58 | 41.65 | 18.25 | 1.25 | 48.28  | 0.0778 |
| 0.70 | 47.27 | 20.28 | 1.42 | 83.72  | 0.0867 |
| 0.57 | 41.12 | 15.41 | 1.34 | 37.24  | 0.0865 |
| 0.55 | 39.37 | 17.09 | 1.21 | 25.25  | 0.0768 |
| 0.53 | 38.59 | 16.68 | 1.20 | 74.06  | 0.0764 |
| 0.59 | 42.04 | 16.33 | 1.34 | 688.94 | 0.0844 |
| 0.63 | 44.09 | 19.41 | 1.31 | 150.84 | 0.0811 |
| 0.55 | 39.53 | 15.98 | 1.26 | 193.59 | 0.0803 |
| 0.54 | 38.75 | 14.81 | 1.28 | 34.54  | 0.0833 |
| 0.59 | 42.34 | 13.83 | 1.47 | 44.45  | 0.0957 |
| 0.61 | 43.37 | 16.92 | 1.37 | 204.98 | 0.0865 |
| 0.61 | 43.47 | 16.19 | 1.40 | 375.21 | 0.0900 |
| 0.53 | 38.59 | 14.60 | 1.28 | 27.54  | 0.0828 |
| 0.57 | 40.77 | 15.31 | 1.33 | 60.00  | 0.0856 |
| 0.64 | 44.78 | 19.27 | 1.34 | 104.80 | 0.0830 |
| 0.66 | 45.71 | 21.83 | 1.30 | 61.16  | 0.0786 |
| 0.68 | 46.41 | 19.35 | 1.41 | 76.00  | 0.0881 |
| 0.56 | 40.37 | 19.87 | 1.16 | 51.04  | 0.0711 |
| 0.63 | 44.42 | 19.56 | 1.31 | 133.94 | 0.0816 |

|      |       |       |      |        |        |
|------|-------|-------|------|--------|--------|
| 0.66 | 45.80 | 21.71 | 1.30 | 80.41  | 0.0793 |
| 0.61 | 43.03 | 17.48 | 1.33 | 61.38  | 0.0842 |
| 0.62 | 43.87 | 20.83 | 1.25 | 60.12  | 0.0768 |
| 0.70 | 47.45 | 20.67 | 1.41 | 125.32 | 0.0863 |
| 0.59 | 42.30 | 16.86 | 1.33 | 37.06  | 0.0839 |
| 0.67 | 46.31 | 19.42 | 1.40 | 95.94  | 0.0877 |
| 0.59 | 41.89 | 17.14 | 1.30 | 125.12 | 0.0821 |
| 0.55 | 39.72 | 15.15 | 1.30 | 59.64  | 0.0836 |
| 0.55 | 39.47 | 17.33 | 1.21 | 65.96  | 0.0776 |
| 0.60 | 42.63 | 17.23 | 1.32 | 146.20 | 0.0837 |
| 0.62 | 43.58 | 21.22 | 1.23 | 105.08 | 0.0749 |
| 0.58 | 41.49 | 15.50 | 1.35 | 69.96  | 0.0865 |
| 0.50 | 36.39 | 15.56 | 1.17 | 43.51  | 0.0755 |
| 0.59 | 41.91 | 17.36 | 1.29 | 40.50  | 0.0818 |
| 0.59 | 42.22 | 15.95 | 1.36 | 90.88  | 0.0872 |
| 0.55 | 39.33 | 14.79 | 1.30 | 260.00 | 0.0843 |
| 0.69 | 47.05 | 20.22 | 1.41 | 115.62 | 0.0868 |
| 0.63 | 44.27 | 18.25 | 1.35 | 263.58 | 0.0836 |
| 0.58 | 41.78 | 15.88 | 1.35 | 66.24  | 0.0861 |
| 0.57 | 41.18 | 20.98 | 1.15 | 61.56  | 0.0707 |
| 0.61 | 43.25 | 19.05 | 1.28 | 46.20  | 0.0801 |
| 0.51 | 36.54 | 15.10 | 1.20 | 9.92   | 0.0779 |
| 0.63 | 44.00 | 19.53 | 1.30 | 42.42  | 0.0797 |
| 0.65 | 45.15 | 19.68 | 1.34 | 155.16 | 0.0836 |
| 0.61 | 43.03 | 17.48 | 1.33 | 293.70 | 0.0842 |
| 0.68 | 46.38 | 21.71 | 1.33 | 77.28  | 0.0805 |
| 0.51 | 36.53 | 15.73 | 1.17 | 86.87  | 0.0756 |
| 0.62 | 43.87 | 17.17 | 1.38 | 118.44 | 0.0873 |
| 0.63 | 44.25 | 16.57 | 1.42 | 195.39 | 0.0902 |
| 0.60 | 42.67 | 17.78 | 1.31 | 98.88  | 0.0823 |
| 0.67 | 46.10 | 18.30 | 1.43 | 279.93 | 0.0899 |
| 0.62 | 43.50 | 19.49 | 1.28 | 133.00 | 0.0789 |
| 0.62 | 43.53 | 23.70 | 1.16 | 98.89  | 0.0702 |
| 0.58 | 41.29 | 16.44 | 1.30 | 57.71  | 0.0832 |
| 0.56 | 40.32 | 15.50 | 1.31 | 38.10  | 0.0836 |
| 0.64 | 44.51 | 21.59 | 1.25 | 33.84  | 0.0767 |
| 0.62 | 43.66 | 17.80 | 1.34 | 97.20  | 0.0846 |
| 0.69 | 47.00 | 21.32 | 1.37 | 227.64 | 0.0843 |
| 0.55 | 39.75 | 15.74 | 1.28 | 99.66  | 0.0826 |
| 0.56 | 40.42 | 15.64 | 1.30 | 123.48 | 0.0837 |
| 0.60 | 42.52 | 17.99 | 1.29 | 90.83  | 0.0814 |
| 0.66 | 45.80 | 18.34 | 1.42 | 220.88 | 0.0886 |
| 0.62 | 43.96 | 19.90 | 1.28 | 35.60  | 0.0789 |
| 0.63 | 44.37 | 17.09 | 1.40 | 234.64 | 0.0905 |
| 0.57 | 41.05 | 16.42 | 1.30 | 120.78 | 0.0820 |
| 0.60 | 42.67 | 17.63 | 1.31 | 45.12  | 0.0828 |
| 0.58 | 41.35 | 17.84 | 1.25 | 53.20  | 0.0791 |
| 0.72 | 48.16 | 24.45 | 1.33 | 117.04 | 0.0804 |
| 0.46 | 32.23 | 12.78 | 1.17 | 27.72  | 0.0780 |
| 0.80 | 50.91 | 25.00 | 1.46 | 75.04  | 0.0878 |
| 0.59 | 41.88 | 18.53 | 1.25 | 34.02  | 0.0787 |

|      |       |       |      |        |        |
|------|-------|-------|------|--------|--------|
| 0.60 | 42.51 | 18.75 | 1.27 | 58.24  | 0.0796 |
| 0.61 | 42.97 | 17.31 | 1.33 | 68.20  | 0.0848 |
| 0.51 | 37.01 | 13.42 | 1.28 | 71.19  | 0.0845 |
| 0.53 | 38.56 | 14.86 | 1.27 | 49.28  | 0.0816 |
| 0.55 | 39.76 | 17.25 | 1.22 | 75.60  | 0.0769 |
| 0.69 | 47.00 | 20.44 | 1.40 | 145.74 | 0.0867 |
| 0.56 | 40.42 | 15.36 | 1.32 | 29.40  | 0.0847 |
| 0.56 | 40.44 | 15.38 | 1.32 | 50.24  | 0.0841 |
| 0.65 | 45.20 | 18.34 | 1.39 | 70.56  | 0.0869 |
| 0.65 | 45.29 | 21.07 | 1.30 | 107.83 | 0.0796 |
| 0.48 | 34.65 | 14.10 | 1.18 | 36.64  | 0.0772 |
| 0.64 | 44.84 | 19.74 | 1.33 | 76.96  | 0.0823 |
| 0.54 | 38.93 | 16.52 | 1.22 | 47.04  | 0.0776 |
| 0.68 | 46.69 | 19.13 | 1.43 | 105.78 | 0.0894 |
| 0.67 | 46.10 | 20.99 | 1.34 | 74.88  | 0.0826 |
| 0.60 | 42.67 | 16.89 | 1.34 | 102.40 | 0.0852 |
| 0.56 | 40.37 | 16.92 | 1.25 | 397.88 | 0.0792 |
| 0.65 | 45.39 | 18.52 | 1.39 | 130.80 | 0.0872 |
| 0.55 | 39.76 | 16.98 | 1.23 | 40.50  | 0.0778 |
| 0.53 | 38.08 | 16.07 | 1.21 | 57.95  | 0.0778 |
| 0.58 | 41.68 | 15.97 | 1.34 | 39.60  | 0.0858 |
| 0.53 | 38.00 | 15.72 | 1.22 | 146.08 | 0.0782 |
| 0.56 | 40.00 | 15.50 | 1.29 | 96.12  | 0.0833 |
| 0.63 | 44.16 | 18.44 | 1.34 | 94.80  | 0.0836 |
| 0.59 | 41.87 | 16.80 | 1.31 | 111.52 | 0.0829 |
| 0.65 | 45.40 | 17.87 | 1.42 | 158.34 | 0.0891 |
| 0.51 | 37.07 | 16.39 | 1.16 | 36.72  | 0.0747 |
| 0.48 | 34.13 | 13.18 | 1.21 | 55.42  | 0.0794 |
| 0.63 | 44.45 | 17.59 | 1.39 | 58.89  | 0.0873 |
| 0.71 | 47.67 | 23.53 | 1.33 | 40.92  | 0.0809 |
| 0.57 | 40.75 | 12.99 | 1.44 | 109.56 | 0.0970 |
| 0.60 | 42.67 | 16.78 | 1.34 | 80.15  | 0.0851 |
| 0.59 | 42.15 | 19.30 | 1.23 | 110.22 | 0.0764 |
| 0.60 | 42.88 | 16.76 | 1.35 | 115.50 | 0.0858 |
| 0.67 | 46.30 | 18.89 | 1.42 | 43.87  | 0.0890 |
| 0.55 | 39.88 | 17.50 | 1.21 | 48.33  | 0.0765 |
| 0.69 | 47.18 | 20.46 | 1.41 | 84.04  | 0.0870 |
| 0.70 | 47.25 | 18.32 | 1.49 | 109.48 | 0.0936 |
| 0.69 | 46.83 | 18.59 | 1.46 | 90.44  | 0.0924 |
| 0.65 | 45.28 | 19.56 | 1.35 | 33.93  | 0.0839 |
| 0.51 | 37.03 | 17.65 | 1.12 | 45.80  | 0.0706 |
| 0.64 | 44.78 | 21.02 | 1.28 | 69.20  | 0.0783 |
| 0.67 | 46.10 | 19.52 | 1.39 | 84.24  | 0.0867 |
| 0.59 | 42.25 | 17.48 | 1.30 | 28.82  | 0.0837 |
| 0.55 | 39.41 | 18.36 | 1.17 | 60.75  | 0.0730 |
| 0.66 | 45.50 | 19.82 | 1.35 | 92.02  | 0.0833 |
| 0.53 | 38.53 | 15.73 | 1.23 | 79.59  | 0.0796 |
| 0.60 | 42.52 | 18.44 | 1.28 | 265.98 | 0.0801 |
| 0.65 | 45.15 | 21.32 | 1.29 | 63.00  | 0.0792 |
| 0.57 | 41.18 | 16.90 | 1.28 | 25.38  | 0.0817 |
| 0.61 | 43.45 | 15.91 | 1.41 | 108.00 | 0.0905 |

|      |       |       |      |        |        |
|------|-------|-------|------|--------|--------|
| 0.54 | 39.06 | 17.31 | 1.19 | 60.21  | 0.0750 |
| 0.62 | 43.95 | 21.05 | 1.25 | 83.70  | 0.0773 |
| 0.61 | 43.05 | 19.02 | 1.28 | 55.50  | 0.0800 |
| 0.59 | 41.91 | 17.19 | 1.30 | 67.50  | 0.0823 |
| 0.51 | 37.00 | 13.70 | 1.27 | 32.12  | 0.0832 |
| 0.46 | 32.25 | 13.05 | 1.16 | 16.66  | 0.0764 |
| 0.58 | 41.65 | 18.00 | 1.26 | 69.36  | 0.0786 |
| 0.56 | 40.56 | 16.98 | 1.26 | 128.96 | 0.0790 |
| 0.55 | 39.49 | 18.18 | 1.18 | 41.50  | 0.0739 |
| 0.78 | 50.43 | 22.67 | 1.51 | 167.58 | 0.0916 |
| 0.66 | 45.70 | 18.67 | 1.40 | 151.70 | 0.0877 |
| 0.56 | 40.09 | 15.72 | 1.29 | 123.30 | 0.0822 |
| 0.55 | 39.57 | 15.08 | 1.30 | 43.68  | 0.0838 |
| 0.61 | 43.32 | 17.46 | 1.34 | 33.60  | 0.0866 |
| 0.72 | 48.30 | 21.47 | 1.43 | 124.85 | 0.0867 |
| 0.54 | 38.74 | 14.35 | 1.30 | 24.70  | 0.0843 |
| 0.61 | 43.02 | 19.33 | 1.27 | 44.64  | 0.0783 |
| 0.58 | 41.62 | 16.53 | 1.31 | 36.89  | 0.0835 |
| 0.58 | 41.23 | 16.19 | 1.31 | 64.20  | 0.0837 |
| 0.64 | 44.89 | 16.76 | 1.44 | 48.64  | 0.0928 |
| 0.63 | 44.21 | 19.17 | 1.32 | 92.50  | 0.0820 |
| 0.59 | 41.98 | 16.01 | 1.35 | 69.31  | 0.0867 |
| 0.59 | 42.24 | 17.57 | 1.30 | 96.25  | 0.0813 |
| 0.62 | 43.88 | 18.66 | 1.32 | 51.66  | 0.0819 |
| 0.59 | 41.88 | 16.96 | 1.31 | 92.61  | 0.0835 |
| 0.54 | 39.26 | 15.97 | 1.25 | 35.00  | 0.0795 |
| 0.64 | 44.94 | 20.24 | 1.31 | 75.60  | 0.0814 |
| 0.49 | 34.93 | 15.61 | 1.13 | 21.42  | 0.0726 |
| 0.54 | 39.10 | 17.45 | 1.19 | 46.80  | 0.0749 |
| 0.45 | 31.71 | 14.23 | 1.10 | 20.64  | 0.0715 |
| 0.70 | 47.59 | 23.63 | 1.33 | 44.10  | 0.0797 |
| 0.71 | 47.94 | 22.31 | 1.38 | 101.20 | 0.0853 |
| 0.60 | 42.48 | 17.76 | 1.30 | 71.61  | 0.0817 |
| 0.58 | 41.58 | 16.66 | 1.31 | 42.56  | 0.0835 |
| 0.46 | 32.29 | 15.36 | 1.07 | 12.00  | 0.0690 |
| 0.55 | 39.61 | 18.30 | 1.18 | 145.75 | 0.0739 |
| 0.61 | 43.45 | 18.26 | 1.32 | 93.96  | 0.0825 |
| 0.53 | 38.00 | 14.84 | 1.25 | 30.78  | 0.0805 |
| 0.58 | 41.27 | 16.35 | 1.31 | 163.35 | 0.0828 |
| 0.56 | 40.42 | 16.47 | 1.27 | 93.80  | 0.0809 |
| 0.62 | 43.98 | 20.53 | 1.26 | 93.60  | 0.0778 |
| 0.61 | 43.35 | 16.53 | 1.38 | 118.40 | 0.0873 |
| 0.57 | 41.12 | 14.96 | 1.36 | 69.72  | 0.0883 |
| 0.66 | 45.58 | 19.92 | 1.35 | 75.62  | 0.0840 |
| 0.57 | 41.21 | 15.10 | 1.36 | 87.12  | 0.0867 |
| 0.59 | 42.04 | 18.57 | 1.25 | 121.77 | 0.0781 |
| 0.56 | 40.40 | 17.06 | 1.25 | 92.56  | 0.0793 |
| 0.65 | 45.05 | 19.52 | 1.34 | 65.12  | 0.0836 |
| 0.72 | 48.04 | 23.24 | 1.36 | 96.50  | 0.0820 |
| 0.72 | 48.04 | 24.25 | 1.33 | 79.00  | 0.0797 |
| 0.60 | 42.74 | 18.82 | 1.27 | 101.68 | 0.0796 |

|      |       |       |      |        |        |
|------|-------|-------|------|--------|--------|
| 0.63 | 44.00 | 17.33 | 1.38 | 89.88  | 0.0863 |
| 0.63 | 44.00 | 16.08 | 1.43 | 64.64  | 0.0923 |
| 0.65 | 45.29 | 17.51 | 1.43 | 78.31  | 0.0901 |
| 0.52 | 37.65 | 14.09 | 1.27 | 45.15  | 0.0834 |
| 0.64 | 44.66 | 16.23 | 1.45 | 103.35 | 0.0928 |
| 0.57 | 41.00 | 17.52 | 1.25 | 66.90  | 0.0788 |
| 0.50 | 36.13 | 13.69 | 1.24 | 24.89  | 0.0816 |
| 0.60 | 42.67 | 18.95 | 1.26 | 69.68  | 0.0798 |
| 0.56 | 40.19 | 16.84 | 1.25 | 51.52  | 0.0791 |
| 0.63 | 44.11 | 20.42 | 1.27 | 88.80  | 0.0783 |
| 0.54 | 39.10 | 13.43 | 1.36 | 62.40  | 0.0892 |
| 0.70 | 47.32 | 17.94 | 1.51 | 99.84  | 0.0949 |
| 0.53 | 38.13 | 14.67 | 1.26 | 38.72  | 0.0822 |
| 0.66 | 45.70 | 18.07 | 1.42 | 130.38 | 0.0896 |
| 0.75 | 49.39 | 22.96 | 1.44 | 103.53 | 0.0875 |
| 0.70 | 47.31 | 21.30 | 1.39 | 116.85 | 0.0856 |
| 0.56 | 40.19 | 15.61 | 1.30 | 212.24 | 0.0832 |
| 0.61 | 43.10 | 18.01 | 1.31 | 137.20 | 0.0824 |
| 0.58 | 41.68 | 17.14 | 1.29 | 42.00  | 0.0818 |
| 0.65 | 45.07 | 20.74 | 1.30 | 103.35 | 0.0801 |
| 0.58 | 41.78 | 17.11 | 1.30 | 84.48  | 0.0819 |
| 0.63 | 44.04 | 18.93 | 1.32 | 177.76 | 0.0812 |
| 0.59 | 41.98 | 15.65 | 1.36 | 97.24  | 0.0872 |
| 0.66 | 45.90 | 19.65 | 1.38 | 293.15 | 0.0854 |
| 0.60 | 42.89 | 18.71 | 1.28 | 57.28  | 0.0802 |
| 0.62 | 43.60 | 19.79 | 1.27 | 28.50  | 0.0784 |
| 0.54 | 39.25 | 16.06 | 1.25 | 238.48 | 0.0802 |
| 0.58 | 41.58 | 16.97 | 1.29 | 37.80  | 0.0824 |
| 0.56 | 40.34 | 15.30 | 1.32 | 30.50  | 0.0853 |
| 0.52 | 37.54 | 15.85 | 1.20 | 39.60  | 0.0770 |
| 0.60 | 42.59 | 17.00 | 1.33 | 37.50  | 0.0849 |
| 0.60 | 42.67 | 16.89 | 1.34 | 33.60  | 0.0852 |
| 0.58 | 41.22 | 15.38 | 1.35 | 70.04  | 0.0860 |
| 0.65 | 45.39 | 17.19 | 1.45 | 125.60 | 0.0917 |
| 0.55 | 39.95 | 15.84 | 1.28 | 91.00  | 0.0818 |
| 0.62 | 43.61 | 18.14 | 1.33 | 134.64 | 0.0837 |
| 0.64 | 44.89 | 19.44 | 1.34 | 53.71  | 0.0827 |
| 0.59 | 42.36 | 14.81 | 1.42 | 58.50  | 0.0924 |
| 0.56 | 40.37 | 17.45 | 1.23 | 132.24 | 0.0775 |
| 0.60 | 42.52 | 16.63 | 1.34 | 44.95  | 0.0858 |
| 0.57 | 40.95 | 15.01 | 1.35 | 35.70  | 0.0864 |
| 0.65 | 45.38 | 20.02 | 1.34 | 87.40  | 0.0831 |
| 0.53 | 38.07 | 14.05 | 1.29 | 73.95  | 0.0833 |
| 0.59 | 42.37 | 19.82 | 1.23 | 56.76  | 0.0756 |
| 0.59 | 42.24 | 17.31 | 1.31 | 59.15  | 0.0821 |
| 0.63 | 44.04 | 16.79 | 1.40 | 49.72  | 0.0880 |
| 0.58 | 41.58 | 16.66 | 1.31 | 41.44  | 0.0835 |
| 0.54 | 38.65 | 14.77 | 1.28 | 66.25  | 0.0827 |
| 0.63 | 44.26 | 19.92 | 1.30 | 90.44  | 0.0805 |
| 0.59 | 42.15 | 16.02 | 1.35 | 35.31  | 0.0865 |
| 0.68 | 46.38 | 19.41 | 1.41 | 115.15 | 0.0868 |

|      |       |       |      |        |        |
|------|-------|-------|------|--------|--------|
| 0.66 | 45.79 | 22.31 | 1.29 | 192.28 | 0.0785 |
| 0.67 | 46.31 | 20.57 | 1.36 | 70.80  | 0.0843 |
| 0.68 | 46.42 | 18.75 | 1.43 | 81.70  | 0.0903 |
| 0.56 | 40.24 | 14.24 | 1.36 | 24.84  | 0.0888 |
| 0.60 | 42.88 | 18.34 | 1.29 | 34.65  | 0.0808 |
| 0.57 | 40.66 | 15.69 | 1.31 | 43.20  | 0.0839 |
| 0.67 | 46.21 | 20.52 | 1.36 | 62.32  | 0.0844 |
| 0.69 | 46.98 | 20.98 | 1.38 | 73.48  | 0.0849 |
| 0.49 | 35.11 | 14.72 | 1.17 | 61.53  | 0.0752 |
| 0.64 | 44.82 | 18.66 | 1.36 | 50.16  | 0.0844 |
| 0.55 | 39.75 | 16.56 | 1.24 | 67.76  | 0.0798 |
| 0.54 | 38.80 | 15.45 | 1.25 | 229.25 | 0.0791 |
| 0.62 | 43.71 | 19.15 | 1.30 | 52.44  | 0.0804 |
| 0.55 | 39.81 | 14.52 | 1.33 | 38.22  | 0.0866 |
| 0.61 | 43.05 | 19.98 | 1.25 | 116.70 | 0.0775 |
| 0.72 | 48.11 | 20.33 | 1.46 | 134.13 | 0.0898 |
| 0.69 | 46.96 | 22.65 | 1.33 | 127.88 | 0.0803 |
| 0.56 | 40.18 | 15.70 | 1.29 | 125.40 | 0.0821 |
| 0.69 | 47.20 | 24.28 | 1.29 | 42.84  | 0.0779 |
| 0.55 | 39.95 | 18.26 | 1.19 | 52.92  | 0.0744 |
| 0.59 | 42.17 | 17.91 | 1.28 | 42.84  | 0.0799 |
| 0.63 | 44.04 | 20.46 | 1.27 | 55.08  | 0.0785 |
| 0.48 | 34.73 | 13.39 | 1.22 | 103.53 | 0.0792 |
| 0.67 | 46.10 | 18.09 | 1.44 | 143.35 | 0.0900 |
| 0.60 | 42.67 | 13.63 | 1.49 | 82.56  | 0.0983 |
| 0.55 | 39.33 | 15.33 | 1.28 | 149.24 | 0.0822 |
| 0.56 | 40.47 | 17.28 | 1.24 | 75.06  | 0.0786 |
| 0.59 | 42.00 | 17.87 | 1.28 | 49.28  | 0.0802 |
| 0.57 | 40.82 | 16.55 | 1.28 | 37.50  | 0.0822 |
| 0.56 | 40.14 | 15.80 | 1.29 | 53.36  | 0.0822 |
| 0.56 | 40.37 | 16.81 | 1.26 | 82.07  | 0.0795 |
| 0.50 | 35.76 | 15.36 | 1.16 | 40.80  | 0.0740 |
| 0.66 | 45.48 | 18.82 | 1.39 | 40.17  | 0.0868 |
| 0.65 | 45.06 | 19.12 | 1.36 | 55.10  | 0.0847 |
| 0.62 | 43.77 | 19.84 | 1.28 | 68.76  | 0.0790 |
| 0.53 | 38.28 | 14.81 | 1.26 | 104.79 | 0.0823 |
| 0.64 | 44.94 | 17.99 | 1.39 | 48.96  | 0.0880 |
| 0.60 | 42.44 | 18.30 | 1.28 | 35.52  | 0.0801 |
| 0.57 | 40.65 | 16.34 | 1.28 | 44.24  | 0.0819 |
| 0.53 | 38.56 | 16.87 | 1.19 | 51.12  | 0.0756 |
| 0.71 | 47.68 | 19.83 | 1.45 | 127.28 | 0.0908 |
| 0.58 | 41.56 | 16.89 | 1.30 | 43.84  | 0.0820 |
| 0.48 | 34.24 | 14.10 | 1.17 | 23.68  | 0.0763 |
| 0.64 | 44.57 | 20.18 | 1.30 | 41.91  | 0.0809 |
| 0.62 | 43.69 | 18.89 | 1.31 | 42.57  | 0.0818 |
| 0.69 | 47.00 | 20.01 | 1.41 | 73.50  | 0.0880 |
| 0.51 | 37.15 | 14.67 | 1.23 | 35.60  | 0.0802 |
| 0.58 | 41.44 | 17.63 | 1.26 | 38.72  | 0.0794 |
| 0.64 | 44.87 | 19.75 | 1.33 | 75.66  | 0.0821 |
| 0.73 | 48.50 | 23.84 | 1.37 | 119.60 | 0.0827 |
| 0.47 | 33.81 | 15.74 | 1.10 | 12.60  | 0.0702 |

|      |       |       |      |        |        |
|------|-------|-------|------|--------|--------|
| 0.54 | 39.29 | 15.54 | 1.27 | 65.88  | 0.0813 |
| 0.56 | 40.39 | 16.39 | 1.27 | 57.36  | 0.0817 |
| 0.53 | 38.03 | 15.70 | 1.22 | 56.91  | 0.0785 |
| 0.59 | 41.87 | 14.73 | 1.40 | 140.08 | 0.0905 |
| 0.69 | 47.17 | 20.43 | 1.41 | 189.74 | 0.0858 |
| 0.57 | 40.71 | 16.00 | 1.30 | 50.22  | 0.0834 |
| 0.61 | 43.19 | 18.32 | 1.31 | 71.30  | 0.0824 |
| 0.63 | 44.33 | 19.08 | 1.33 | 45.98  | 0.0825 |
| 0.65 | 45.22 | 18.35 | 1.39 | 156.64 | 0.0866 |
| 0.54 | 38.79 | 14.70 | 1.29 | 58.24  | 0.0828 |
| 0.61 | 43.23 | 16.98 | 1.36 | 32.76  | 0.0860 |
| 0.53 | 38.25 | 14.52 | 1.28 | 81.18  | 0.0831 |
| 0.58 | 41.29 | 16.38 | 1.31 | 36.54  | 0.0834 |
| 0.52 | 37.67 | 15.04 | 1.23 | 23.14  | 0.0791 |
| 0.67 | 46.20 | 19.20 | 1.41 | 44.94  | 0.0876 |
| 0.57 | 40.65 | 14.95 | 1.34 | 74.48  | 0.0870 |
| 0.59 | 42.30 | 18.53 | 1.27 | 55.08  | 0.0788 |
| 0.68 | 46.40 | 19.99 | 1.39 | 103.74 | 0.0859 |
| 0.64 | 44.63 | 19.65 | 1.32 | 166.13 | 0.0819 |
| 0.61 | 43.42 | 17.49 | 1.35 | 125.97 | 0.0844 |
| 0.62 | 43.58 | 17.76 | 1.34 | 64.35  | 0.0849 |
| 0.60 | 42.59 | 19.83 | 1.23 | 161.70 | 0.0766 |
| 0.61 | 43.37 | 17.19 | 1.36 | 58.09  | 0.0855 |
| 0.76 | 49.53 | 26.27 | 1.35 | 157.18 | 0.0796 |
| 0.57 | 41.12 | 18.37 | 1.23 | 47.88  | 0.0770 |
| 0.58 | 41.68 | 16.35 | 1.32 | 51.60  | 0.0845 |
| 0.68 | 46.41 | 21.26 | 1.34 | 52.80  | 0.0828 |
| 0.57 | 40.89 | 16.23 | 1.30 | 74.56  | 0.0823 |
| 0.59 | 42.08 | 17.21 | 1.30 | 147.42 | 0.0814 |
| 0.61 | 43.01 | 17.82 | 1.32 | 44.07  | 0.0822 |
| 0.66 | 45.89 | 20.86 | 1.33 | 31.82  | 0.0826 |
| 0.58 | 41.29 | 16.56 | 1.30 | 47.85  | 0.0828 |
| 0.63 | 44.00 | 20.51 | 1.27 | 38.64  | 0.0771 |
| 0.52 | 37.33 | 15.09 | 1.22 | 47.94  | 0.0796 |
| 0.52 | 37.46 | 13.94 | 1.28 | 411.36 | 0.0830 |
| 0.62 | 43.96 | 18.74 | 1.32 | 51.80  | 0.0828 |
| 0.64 | 44.82 | 22.17 | 1.25 | 114.45 | 0.0764 |
| 0.56 | 40.37 | 17.32 | 1.24 | 51.91  | 0.0779 |
| 0.65 | 45.29 | 17.37 | 1.43 | 33.62  | 0.0906 |
| 0.61 | 43.44 | 20.19 | 1.25 | 168.00 | 0.0783 |
| 0.59 | 41.88 | 19.35 | 1.22 | 49.95  | 0.0764 |
| 0.60 | 42.44 | 15.97 | 1.37 | 99.84  | 0.0877 |
| 0.62 | 43.84 | 19.23 | 1.30 | 88.53  | 0.0804 |
| 0.57 | 41.06 | 15.66 | 1.33 | 66.12  | 0.0853 |
| 0.57 | 41.12 | 14.47 | 1.38 | 22.62  | 0.0906 |
| 0.55 | 39.82 | 14.71 | 1.32 | 41.23  | 0.0850 |
| 0.61 | 43.31 | 17.09 | 1.36 | 102.90 | 0.0860 |
| 0.58 | 41.71 | 15.18 | 1.37 | 59.60  | 0.0872 |
| 0.56 | 40.00 | 16.75 | 1.25 | 24.57  | 0.0791 |
| 0.63 | 44.48 | 17.91 | 1.38 | 136.53 | 0.0861 |
| 0.62 | 43.91 | 19.60 | 1.29 | 42.57  | 0.0805 |

|      |       |       |      |        |        |
|------|-------|-------|------|--------|--------|
| 0.65 | 45.29 | 19.65 | 1.35 | 216.48 | 0.0834 |
| 0.62 | 43.92 | 18.62 | 1.33 | 148.96 | 0.0826 |
| 0.56 | 40.52 | 17.53 | 1.24 | 34.06  | 0.0782 |
| 0.60 | 42.82 | 18.32 | 1.29 | 76.20  | 0.0814 |
| 0.55 | 39.47 | 15.56 | 1.27 | 22.61  | 0.0834 |
| 0.67 | 46.10 | 18.24 | 1.44 | 164.97 | 0.0908 |
| 0.62 | 43.61 | 18.74 | 1.31 | 81.60  | 0.0819 |
| 0.59 | 42.09 | 18.18 | 1.27 | 673.88 | 0.0792 |
| 0.56 | 40.02 | 15.65 | 1.29 | 47.56  | 0.0824 |
| 0.52 | 37.84 | 17.38 | 1.15 | 21.96  | 0.0734 |
| 0.62 | 43.53 | 19.75 | 1.27 | 87.50  | 0.0787 |
| 0.63 | 44.42 | 19.35 | 1.32 | 64.38  | 0.0821 |
| 0.63 | 44.13 | 19.15 | 1.32 | 68.02  | 0.0817 |
| 0.45 | 31.67 | 13.44 | 1.13 | 10.26  | 0.0747 |
| 0.54 | 38.93 | 14.24 | 1.31 | 36.00  | 0.0856 |
| 0.66 | 45.58 | 18.73 | 1.39 | 163.40 | 0.0875 |
| 0.60 | 42.44 | 18.30 | 1.28 | 34.24  | 0.0801 |
| 0.60 | 42.67 | 15.98 | 1.38 | 66.15  | 0.0879 |
| 0.49 | 34.92 | 12.98 | 1.24 | 16.96  | 0.0822 |
| 0.58 | 41.45 | 19.08 | 1.22 | 41.70  | 0.0756 |
| 0.56 | 40.14 | 16.07 | 1.28 | 57.13  | 0.0813 |
| 0.55 | 39.53 | 15.90 | 1.26 | 19.17  | 0.0806 |
| 0.55 | 39.53 | 16.11 | 1.25 | 38.88  | 0.0799 |
| 0.56 | 40.37 | 14.50 | 1.35 | 55.39  | 0.0877 |
| 0.57 | 40.88 | 17.14 | 1.26 | 62.72  | 0.0800 |
| 0.61 | 43.45 | 17.87 | 1.33 | 117.00 | 0.0837 |
| 0.63 | 44.26 | 18.64 | 1.34 | 72.76  | 0.0842 |
| 0.52 | 37.69 | 15.18 | 1.23 | 24.25  | 0.0788 |
| 0.61 | 43.14 | 16.36 | 1.38 | 31.72  | 0.0895 |
| 0.60 | 42.67 | 18.07 | 1.29 | 64.00  | 0.0814 |
| 0.49 | 35.38 | 13.52 | 1.23 | 41.58  | 0.0800 |
| 0.52 | 37.25 | 16.11 | 1.18 | 38.72  | 0.0752 |
| 0.51 | 36.96 | 13.64 | 1.27 | 33.50  | 0.0828 |
| 0.60 | 42.59 | 18.22 | 1.29 | 33.00  | 0.0806 |
| 0.63 | 44.00 | 20.09 | 1.28 | 87.36  | 0.0796 |
| 0.60 | 42.52 | 18.34 | 1.28 | 41.14  | 0.0799 |
| 0.57 | 41.12 | 16.89 | 1.28 | 82.88  | 0.0814 |
| 0.67 | 46.10 | 18.72 | 1.42 | 110.29 | 0.0889 |
| 0.60 | 42.74 | 14.84 | 1.43 | 151.59 | 0.0933 |
| 0.55 | 39.72 | 16.59 | 1.24 | 69.44  | 0.0787 |
| 0.61 | 43.19 | 17.51 | 1.34 | 31.62  | 0.0849 |
| 0.63 | 44.16 | 17.38 | 1.38 | 117.20 | 0.0869 |
| 0.68 | 46.41 | 21.32 | 1.34 | 63.20  | 0.0826 |
| 0.56 | 40.00 | 16.75 | 1.25 | 99.90  | 0.0791 |
| 0.57 | 41.18 | 16.04 | 1.32 | 33.75  | 0.0846 |
| 0.54 | 38.93 | 15.38 | 1.26 | 35.28  | 0.0814 |
| 0.61 | 43.42 | 20.83 | 1.23 | 70.06  | 0.0762 |
| 0.56 | 40.20 | 16.76 | 1.25 | 96.90  | 0.0791 |
| 0.57 | 40.89 | 15.72 | 1.32 | 53.12  | 0.0841 |
| 0.64 | 44.66 | 18.22 | 1.37 | 211.77 | 0.0859 |
| 0.58 | 41.67 | 16.49 | 1.32 | 137.60 | 0.0836 |

|      |       |       |      |        |        |
|------|-------|-------|------|--------|--------|
| 0.49 | 35.47 | 13.14 | 1.25 | 35.82  | 0.0825 |
| 0.64 | 44.91 | 17.83 | 1.40 | 136.74 | 0.0874 |
| 0.59 | 41.96 | 15.87 | 1.35 | 45.36  | 0.0860 |
| 0.57 | 40.78 | 16.94 | 1.27 | 78.54  | 0.0795 |
| 0.52 | 37.81 | 14.92 | 1.24 | 62.75  | 0.0800 |
| 0.65 | 45.05 | 19.58 | 1.34 | 88.36  | 0.0820 |
| 0.59 | 42.36 | 16.87 | 1.33 | 114.60 | 0.0847 |
| 0.61 | 43.33 | 17.31 | 1.35 | 153.92 | 0.0858 |
| 0.63 | 44.09 | 17.96 | 1.36 | 87.84  | 0.0854 |
| 0.52 | 37.86 | 14.96 | 1.24 | 40.32  | 0.0795 |
| 0.57 | 41.12 | 14.52 | 1.38 | 86.52  | 0.0900 |
| 0.62 | 43.50 | 20.01 | 1.26 | 51.00  | 0.0787 |
| 0.50 | 36.00 | 13.66 | 1.24 | 26.86  | 0.0818 |
| 0.61 | 43.17 | 19.02 | 1.28 | 71.06  | 0.0798 |
| 0.57 | 40.69 | 19.83 | 1.17 | 38.64  | 0.0728 |
| 0.58 | 41.43 | 19.65 | 1.20 | 25.50  | 0.0735 |
| 0.60 | 42.81 | 16.07 | 1.38 | 51.84  | 0.0879 |
| 0.69 | 46.99 | 20.04 | 1.41 | 95.03  | 0.0877 |
| 0.62 | 43.53 | 17.43 | 1.35 | 67.20  | 0.0856 |
| 0.59 | 41.84 | 16.49 | 1.32 | 43.40  | 0.0843 |
| 0.67 | 46.00 | 18.70 | 1.41 | 38.18  | 0.0879 |
| 0.57 | 40.95 | 17.13 | 1.26 | 67.98  | 0.0794 |
| 0.63 | 44.22 | 18.81 | 1.33 | 63.04  | 0.0838 |
| 0.59 | 42.05 | 20.08 | 1.21 | 53.48  | 0.0749 |
| 0.58 | 41.58 | 16.66 | 1.31 | 55.44  | 0.0835 |
| 0.65 | 45.28 | 18.89 | 1.37 | 51.48  | 0.0859 |
| 0.57 | 41.11 | 15.25 | 1.35 | 59.52  | 0.0865 |
| 0.55 | 39.57 | 14.94 | 1.30 | 36.66  | 0.0843 |
| 0.61 | 43.16 | 16.33 | 1.38 | 98.42  | 0.0878 |
| 0.63 | 44.44 | 19.56 | 1.31 | 104.12 | 0.0815 |
| 0.55 | 39.72 | 17.12 | 1.22 | 126.00 | 0.0771 |
| 0.66 | 45.50 | 19.63 | 1.36 | 73.53  | 0.0839 |
| 0.53 | 37.98 | 15.61 | 1.22 | 31.05  | 0.0784 |
| 0.57 | 41.12 | 16.30 | 1.30 | 61.04  | 0.0834 |
| 0.56 | 40.19 | 14.79 | 1.33 | 35.84  | 0.0863 |
| 0.58 | 41.45 | 17.09 | 1.28 | 23.40  | 0.0814 |
| 0.62 | 43.58 | 20.26 | 1.26 | 69.93  | 0.0772 |
| 0.65 | 45.31 | 17.99 | 1.41 | 250.26 | 0.0882 |
| 0.68 | 46.78 | 19.65 | 1.42 | 122.76 | 0.0880 |
| 0.59 | 41.84 | 16.74 | 1.31 | 88.04  | 0.0834 |
| 0.58 | 41.35 | 17.53 | 1.26 | 154.28 | 0.0800 |
| 0.64 | 44.85 | 18.70 | 1.36 | 93.38  | 0.0841 |
| 0.57 | 41.11 | 17.05 | 1.27 | 91.20  | 0.0802 |
| 0.53 | 38.44 | 14.24 | 1.29 | 50.16  | 0.0843 |
| 0.59 | 41.84 | 15.38 | 1.37 | 54.87  | 0.0883 |
| 0.59 | 42.07 | 16.99 | 1.31 | 73.16  | 0.0833 |
| 0.62 | 43.55 | 16.67 | 1.39 | 179.20 | 0.0874 |
| 0.61 | 43.03 | 17.93 | 1.31 | 71.61  | 0.0828 |
| 0.66 | 45.70 | 20.44 | 1.34 | 85.69  | 0.0825 |
| 0.73 | 48.45 | 25.06 | 1.33 | 120.96 | 0.0796 |
| 0.63 | 44.28 | 19.90 | 1.30 | 91.84  | 0.0797 |

|      |       |       |      |        |        |
|------|-------|-------|------|--------|--------|
| 0.59 | 42.15 | 16.70 | 1.33 | 82.50  | 0.0842 |
| 0.59 | 42.07 | 16.27 | 1.34 | 72.85  | 0.0857 |
| 0.59 | 42.22 | 17.94 | 1.28 | 217.60 | 0.0806 |
| 0.55 | 39.81 | 13.10 | 1.40 | 53.30  | 0.0927 |
| 0.61 | 43.05 | 19.02 | 1.28 | 108.90 | 0.0800 |
| 0.57 | 40.63 | 15.40 | 1.32 | 72.52  | 0.0838 |
| 0.49 | 34.96 | 14.07 | 1.19 | 33.63  | 0.0775 |
| 0.63 | 44.08 | 20.23 | 1.28 | 117.67 | 0.0782 |
| 0.59 | 42.29 | 14.81 | 1.41 | 91.45  | 0.0919 |
| 0.61 | 43.39 | 16.30 | 1.39 | 161.16 | 0.0892 |
| 0.62 | 43.68 | 16.41 | 1.40 | 65.60  | 0.0886 |
| 0.64 | 44.75 | 20.62 | 1.29 | 58.90  | 0.0795 |
| 0.51 | 36.77 | 15.80 | 1.18 | 13.60  | 0.0754 |
| 0.59 | 42.37 | 18.43 | 1.27 | 56.76  | 0.0794 |
| 0.51 | 36.76 | 11.82 | 1.36 | 66.57  | 0.0913 |
| 0.61 | 43.17 | 19.23 | 1.27 | 31.28  | 0.0793 |
| 0.61 | 43.23 | 17.19 | 1.35 | 42.12  | 0.0853 |
| 0.64 | 44.95 | 17.32 | 1.42 | 89.30  | 0.0887 |
| 0.62 | 43.87 | 19.83 | 1.28 | 60.45  | 0.0800 |
| 0.58 | 41.71 | 17.12 | 1.29 | 35.31  | 0.0815 |
| 0.58 | 41.49 | 16.02 | 1.33 | 47.85  | 0.0846 |
| 0.63 | 44.27 | 21.41 | 1.25 | 162.00 | 0.0759 |
| 0.59 | 42.32 | 16.89 | 1.33 | 64.38  | 0.0847 |
| 0.59 | 42.11 | 16.49 | 1.33 | 87.04  | 0.0849 |
| 0.58 | 41.68 | 13.94 | 1.43 | 153.90 | 0.0939 |
| 0.55 | 39.37 | 17.37 | 1.20 | 130.25 | 0.0759 |
| 0.62 | 43.78 | 17.71 | 1.35 | 74.56  | 0.0859 |
| 0.68 | 46.49 | 22.50 | 1.31 | 40.95  | 0.0793 |
| 0.52 | 37.46 | 14.96 | 1.23 | 65.04  | 0.0792 |
| 0.60 | 42.48 | 20.38 | 1.21 | 260.10 | 0.0749 |
| 0.59 | 42.38 | 18.76 | 1.26 | 34.20  | 0.0781 |
| 0.63 | 44.30 | 17.53 | 1.38 | 127.08 | 0.0875 |
| 0.50 | 35.73 | 14.52 | 1.20 | 31.28  | 0.0779 |
| 0.62 | 43.93 | 16.61 | 1.40 | 182.24 | 0.0898 |
| 0.54 | 39.10 | 14.96 | 1.29 | 43.94  | 0.0830 |
| 0.53 | 38.08 | 17.35 | 1.16 | 28.50  | 0.0739 |
| 0.62 | 43.78 | 21.65 | 1.22 | 87.36  | 0.0751 |
| 0.63 | 44.44 | 19.91 | 1.30 | 63.36  | 0.0814 |
| 0.68 | 46.40 | 19.21 | 1.41 | 96.35  | 0.0884 |
| 0.61 | 43.11 | 16.29 | 1.38 | 48.32  | 0.0886 |
| 0.69 | 47.05 | 19.08 | 1.45 | 90.24  | 0.0902 |
| 0.64 | 44.89 | 18.43 | 1.37 | 59.45  | 0.0857 |
| 0.61 | 43.39 | 18.37 | 1.31 | 113.56 | 0.0823 |
| 0.63 | 44.28 | 15.87 | 1.45 | 83.64  | 0.0926 |
| 0.53 | 38.11 | 15.57 | 1.23 | 16.20  | 0.0797 |
| 0.58 | 41.29 | 19.46 | 1.20 | 61.48  | 0.0744 |
| 0.59 | 42.37 | 19.27 | 1.24 | 71.28  | 0.0771 |
| 0.57 | 40.78 | 16.55 | 1.28 | 61.12  | 0.0810 |
| 0.54 | 38.82 | 13.69 | 1.33 | 83.97  | 0.0871 |
| 0.59 | 41.81 | 18.57 | 1.25 | 53.76  | 0.0782 |
| 0.58 | 41.24 | 14.46 | 1.39 | 37.70  | 0.0910 |

|      |       |       |      |        |        |
|------|-------|-------|------|--------|--------|
| 0.55 | 39.66 | 16.32 | 1.25 | 49.92  | 0.0800 |
| 0.63 | 44.37 | 15.84 | 1.46 | 131.60 | 0.0932 |
| 0.54 | 39.08 | 18.75 | 1.15 | 31.60  | 0.0722 |
| 0.60 | 42.59 | 18.26 | 1.29 | 77.10  | 0.0810 |
| 0.56 | 40.18 | 15.01 | 1.32 | 63.03  | 0.0846 |
| 0.76 | 49.75 | 23.45 | 1.44 | 153.36 | 0.0872 |
| 0.55 | 39.95 | 14.10 | 1.36 | 63.84  | 0.0884 |
| 0.60 | 42.89 | 19.05 | 1.27 | 37.76  | 0.0792 |
| 0.65 | 45.06 | 19.85 | 1.33 | 216.60 | 0.0826 |
| 0.67 | 46.21 | 21.87 | 1.32 | 85.32  | 0.0812 |
| 0.65 | 45.05 | 19.68 | 1.34 | 80.29  | 0.0832 |
| 0.59 | 42.09 | 17.91 | 1.28 | 83.30  | 0.0800 |
| 0.56 | 40.58 | 16.06 | 1.29 | 83.25  | 0.0832 |
| 0.70 | 47.34 | 21.60 | 1.38 | 91.26  | 0.0852 |
| 0.59 | 41.98 | 17.89 | 1.27 | 240.12 | 0.0805 |
| 0.58 | 41.39 | 15.74 | 1.34 | 132.99 | 0.0856 |
| 0.68 | 46.43 | 18.62 | 1.44 | 27.36  | 0.0911 |
| 0.59 | 42.22 | 17.37 | 1.30 | 44.16  | 0.0823 |
| 0.67 | 46.29 | 17.12 | 1.49 | 88.36  | 0.0941 |
| 0.61 | 43.17 | 18.88 | 1.29 | 47.60  | 0.0802 |
| 0.59 | 42.37 | 18.01 | 1.29 | 97.02  | 0.0807 |
| 0.71 | 47.76 | 20.43 | 1.44 | 73.92  | 0.0892 |
| 0.57 | 40.65 | 16.23 | 1.29 | 78.68  | 0.0823 |
| 0.70 | 47.48 | 24.64 | 1.30 | 52.00  | 0.0771 |
| 0.52 | 37.45 | 16.60 | 1.17 | 55.75  | 0.0737 |
| 0.63 | 44.43 | 17.13 | 1.40 | 87.11  | 0.0901 |
| 0.59 | 42.30 | 19.60 | 1.23 | 49.98  | 0.0759 |
| 0.58 | 41.56 | 18.26 | 1.25 | 96.64  | 0.0778 |
| 0.52 | 37.43 | 13.64 | 1.29 | 51.74  | 0.0838 |
| 0.58 | 41.75 | 17.84 | 1.27 | 46.98  | 0.0800 |
| 0.62 | 43.78 | 18.37 | 1.33 | 58.88  | 0.0838 |
| 0.57 | 41.11 | 13.44 | 1.43 | 66.96  | 0.0933 |
| 0.51 | 36.73 | 12.94 | 1.30 | 88.08  | 0.0854 |
| 0.56 | 40.37 | 15.58 | 1.30 | 53.65  | 0.0837 |
| 0.56 | 40.14 | 16.73 | 1.25 | 36.54  | 0.0792 |
| 0.63 | 44.00 | 18.51 | 1.33 | 35.89  | 0.0833 |
| 0.56 | 40.14 | 18.44 | 1.19 | 35.67  | 0.0742 |
| 0.51 | 36.64 | 15.76 | 1.17 | 60.20  | 0.0753 |
| 0.56 | 40.18 | 19.40 | 1.16 | 47.52  | 0.0713 |
| 0.56 | 40.42 | 17.59 | 1.23 | 80.64  | 0.0774 |
| 0.63 | 44.48 | 19.26 | 1.33 | 94.71  | 0.0820 |
| 0.61 | 43.10 | 17.23 | 1.34 | 256.55 | 0.0849 |
| 0.66 | 45.59 | 19.65 | 1.36 | 69.20  | 0.0845 |
| 0.58 | 41.52 | 17.19 | 1.28 | 42.63  | 0.0814 |
| 0.59 | 42.32 | 16.97 | 1.32 | 95.83  | 0.0831 |
| 0.60 | 42.74 | 18.20 | 1.29 | 144.15 | 0.0814 |
| 0.64 | 44.57 | 20.18 | 1.30 | 109.23 | 0.0809 |
| 0.58 | 41.37 | 18.51 | 1.23 | 33.84  | 0.0778 |
| 0.55 | 39.95 | 18.64 | 1.18 | 22.08  | 0.0741 |
| 0.63 | 44.35 | 15.41 | 1.48 | 40.92  | 0.0961 |
| 0.60 | 42.82 | 18.32 | 1.29 | 25.80  | 0.0814 |

|      |       |       |      |        |        |
|------|-------|-------|------|--------|--------|
| 0.65 | 45.31 | 19.83 | 1.34 | 123.20 | 0.0826 |
| 0.59 | 42.22 | 19.08 | 1.24 | 43.84  | 0.0773 |
| 0.64 | 44.54 | 21.20 | 1.27 | 34.96  | 0.0775 |
| 0.60 | 42.46 | 17.01 | 1.33 | 116.28 | 0.0833 |
| 0.52 | 37.79 | 14.54 | 1.26 | 60.00  | 0.0822 |
| 0.55 | 39.68 | 15.21 | 1.30 | 39.73  | 0.0831 |
| 0.58 | 41.29 | 15.39 | 1.35 | 29.87  | 0.0869 |
| 0.56 | 40.48 | 16.27 | 1.28 | 90.19  | 0.0816 |
| 0.63 | 44.42 | 18.07 | 1.37 | 83.99  | 0.0860 |
| 0.49 | 35.47 | 14.52 | 1.19 | 48.45  | 0.0773 |
| 0.69 | 47.03 | 20.41 | 1.40 | 113.68 | 0.0859 |
| 0.66 | 45.60 | 17.78 | 1.43 | 188.19 | 0.0902 |
| 0.55 | 39.57 | 14.24 | 1.33 | 45.50  | 0.0870 |
| 0.55 | 39.66 | 17.84 | 1.20 | 39.36  | 0.0754 |
| 0.65 | 45.31 | 20.14 | 1.33 | 28.38  | 0.0818 |
| 0.57 | 41.17 | 16.52 | 1.30 | 66.96  | 0.0823 |
| 0.59 | 41.91 | 16.44 | 1.33 | 61.80  | 0.0848 |
| 0.61 | 43.33 | 18.89 | 1.29 | 54.08  | 0.0809 |
| 0.60 | 42.67 | 17.82 | 1.30 | 95.76  | 0.0813 |
| 0.62 | 43.63 | 16.56 | 1.39 | 85.02  | 0.0882 |
| 0.57 | 40.72 | 16.28 | 1.29 | 113.77 | 0.0819 |
| 0.63 | 44.28 | 18.07 | 1.36 | 116.55 | 0.0858 |
| 0.67 | 46.22 | 18.28 | 1.44 | 73.44  | 0.0918 |
| 0.63 | 44.39 | 20.78 | 1.27 | 58.80  | 0.0785 |
| 0.60 | 42.59 | 17.94 | 1.30 | 54.78  | 0.0815 |
| 0.64 | 44.94 | 20.24 | 1.31 | 71.64  | 0.0814 |
| 0.61 | 43.39 | 15.70 | 1.42 | 48.28  | 0.0914 |
| 0.68 | 46.49 | 19.36 | 1.41 | 162.45 | 0.0876 |
| 0.62 | 43.50 | 18.47 | 1.31 | 27.60  | 0.0830 |
| 0.46 | 32.90 | 16.19 | 1.06 | 27.56  | 0.0675 |
| 0.59 | 42.22 | 18.17 | 1.27 | 43.52  | 0.0799 |
| 0.52 | 37.75 | 14.91 | 1.24 | 66.66  | 0.0804 |
| 0.56 | 40.14 | 16.07 | 1.28 | 36.54  | 0.0813 |
| 0.49 | 35.17 | 16.37 | 1.11 | 29.82  | 0.0713 |
| 0.61 | 43.17 | 18.88 | 1.29 | 106.76 | 0.0802 |
| 0.58 | 41.56 | 13.70 | 1.44 | 70.40  | 0.0943 |
| 0.60 | 42.59 | 18.79 | 1.27 | 39.27  | 0.0790 |
| 0.54 | 39.08 | 18.75 | 1.15 | 20.60  | 0.0722 |
| 0.60 | 42.44 | 16.71 | 1.34 | 64.38  | 0.0856 |
| 0.61 | 43.45 | 16.47 | 1.39 | 34.56  | 0.0884 |
| 0.63 | 44.42 | 14.52 | 1.52 | 86.21  | 0.0995 |
| 0.51 | 36.50 | 13.18 | 1.28 | 31.68  | 0.0841 |
| 0.64 | 44.70 | 20.76 | 1.29 | 52.36  | 0.0796 |
| 0.57 | 41.00 | 15.39 | 1.34 | 70.80  | 0.0859 |
| 0.55 | 39.60 | 15.17 | 1.29 | 68.82  | 0.0827 |
| 0.66 | 45.50 | 21.15 | 1.31 | 65.10  | 0.0799 |
| 0.61 | 43.05 | 19.02 | 1.28 | 135.30 | 0.0800 |
| 0.62 | 43.78 | 19.68 | 1.28 | 105.28 | 0.0800 |
| 0.71 | 47.74 | 19.17 | 1.48 | 62.73  | 0.0920 |
| 0.56 | 40.09 | 14.70 | 1.33 | 39.60  | 0.0860 |
| 0.55 | 39.52 | 15.09 | 1.29 | 38.10  | 0.0830 |

|      |       |       |      |        |        |
|------|-------|-------|------|--------|--------|
| 0.53 | 38.41 | 16.59 | 1.20 | 49.00  | 0.0759 |
| 0.49 | 35.47 | 13.69 | 1.22 | 36.54  | 0.0803 |
| 0.55 | 39.70 | 16.75 | 1.24 | 87.38  | 0.0773 |
| 0.61 | 42.96 | 17.65 | 1.32 | 121.38 | 0.0832 |
| 0.56 | 40.00 | 16.94 | 1.24 | 167.68 | 0.0777 |
| 0.56 | 40.60 | 17.52 | 1.24 | 101.50 | 0.0779 |
| 0.58 | 41.29 | 15.74 | 1.33 | 72.36  | 0.0860 |
| 0.62 | 43.50 | 17.38 | 1.35 | 110.58 | 0.0851 |
| 0.59 | 42.30 | 16.11 | 1.36 | 103.02 | 0.0865 |
| 0.51 | 36.79 | 16.93 | 1.14 | 18.90  | 0.0724 |
| 0.57 | 40.89 | 15.67 | 1.32 | 122.24 | 0.0843 |
| 0.58 | 41.62 | 16.75 | 1.30 | 53.63  | 0.0828 |
| 0.63 | 44.00 | 19.36 | 1.30 | 86.21  | 0.0808 |
| 0.53 | 37.95 | 17.12 | 1.17 | 74.16  | 0.0735 |
| 0.68 | 46.75 | 21.48 | 1.35 | 48.96  | 0.0823 |
| 0.72 | 48.26 | 21.56 | 1.42 | 180.00 | 0.0873 |
| 0.58 | 41.62 | 17.31 | 1.28 | 49.60  | 0.0810 |
| 0.62 | 43.50 | 16.33 | 1.40 | 143.64 | 0.0888 |
| 0.58 | 41.41 | 16.37 | 1.31 | 81.00  | 0.0841 |
| 0.61 | 42.95 | 18.09 | 1.31 | 131.35 | 0.0815 |
| 0.67 | 46.30 | 19.82 | 1.39 | 115.50 | 0.0861 |
| 0.60 | 42.59 | 16.52 | 1.35 | 48.84  | 0.0861 |
| 0.59 | 42.30 | 17.70 | 1.29 | 58.48  | 0.0812 |
| 0.59 | 41.81 | 16.37 | 1.33 | 43.12  | 0.0851 |
| 0.58 | 41.23 | 15.91 | 1.32 | 106.80 | 0.0847 |
| 0.64 | 44.75 | 19.85 | 1.32 | 106.40 | 0.0816 |
| 0.63 | 44.43 | 17.01 | 1.41 | 218.68 | 0.0885 |
| 0.59 | 42.37 | 17.03 | 1.32 | 103.95 | 0.0837 |
| 0.48 | 34.08 | 13.40 | 1.20 | 19.35  | 0.0788 |
| 0.66 | 45.81 | 18.40 | 1.42 | 164.22 | 0.0882 |
| 0.60 | 42.67 | 18.37 | 1.28 | 42.88  | 0.0805 |
| 0.60 | 42.52 | 17.25 | 1.32 | 85.68  | 0.0833 |
| 0.62 | 43.74 | 17.78 | 1.35 | 52.15  | 0.0851 |
| 0.55 | 39.41 | 16.00 | 1.25 | 40.80  | 0.0805 |
| 0.56 | 40.60 | 16.98 | 1.26 | 46.11  | 0.0796 |
| 0.56 | 40.42 | 16.19 | 1.28 | 50.96  | 0.0818 |
| 0.60 | 42.94 | 16.46 | 1.37 | 80.00  | 0.0863 |
| 0.59 | 42.05 | 17.67 | 1.29 | 91.56  | 0.0815 |
| 0.62 | 43.78 | 17.06 | 1.38 | 194.24 | 0.0881 |
| 0.57 | 40.89 | 17.49 | 1.25 | 38.70  | 0.0786 |
| 0.46 | 32.44 | 13.93 | 1.13 | 40.35  | 0.0734 |
| 0.61 | 43.17 | 15.77 | 1.41 | 39.10  | 0.0905 |
| 0.53 | 37.93 | 15.97 | 1.21 | 63.25  | 0.0767 |
| 0.57 | 41.16 | 15.05 | 1.36 | 69.30  | 0.0869 |
| 0.62 | 43.66 | 19.08 | 1.30 | 65.16  | 0.0808 |
| 0.64 | 44.63 | 20.02 | 1.31 | 165.00 | 0.0800 |
| 0.61 | 43.11 | 16.76 | 1.36 | 49.14  | 0.0859 |
| 0.55 | 39.53 | 15.12 | 1.29 | 39.42  | 0.0834 |
| 0.58 | 41.62 | 16.75 | 1.30 | 32.55  | 0.0828 |
| 0.58 | 41.39 | 17.80 | 1.26 | 51.77  | 0.0789 |
| 0.55 | 39.68 | 15.47 | 1.28 | 41.76  | 0.0822 |

|      |       |       |      |        |        |
|------|-------|-------|------|--------|--------|
| 0.67 | 46.00 | 20.55 | 1.35 | 56.44  | 0.0842 |
| 0.63 | 44.30 | 17.84 | 1.37 | 58.68  | 0.0865 |
| 0.63 | 44.45 | 14.52 | 1.53 | 191.88 | 0.0992 |
| 0.57 | 40.94 | 16.23 | 1.30 | 28.00  | 0.0836 |
| 0.66 | 45.89 | 17.78 | 1.45 | 55.50  | 0.0919 |
| 0.56 | 40.02 | 14.21 | 1.35 | 90.19  | 0.0880 |
| 0.56 | 40.49 | 16.61 | 1.27 | 32.86  | 0.0802 |
| 0.61 | 43.02 | 18.82 | 1.28 | 33.28  | 0.0812 |
| 0.55 | 39.76 | 15.69 | 1.28 | 25.38  | 0.0820 |
| 0.56 | 40.14 | 15.80 | 1.29 | 72.21  | 0.0822 |
| 0.61 | 43.33 | 17.31 | 1.35 | 72.64  | 0.0858 |
| 0.57 | 40.84 | 14.53 | 1.37 | 51.81  | 0.0883 |
| 0.56 | 40.56 | 15.53 | 1.31 | 169.60 | 0.0839 |
| 0.64 | 44.91 | 20.01 | 1.32 | 118.32 | 0.0822 |
| 0.69 | 47.11 | 22.57 | 1.34 | 166.05 | 0.0817 |
| 0.64 | 44.67 | 19.80 | 1.32 | 140.48 | 0.0824 |
| 0.60 | 42.44 | 17.28 | 1.32 | 75.52  | 0.0832 |
| 0.67 | 46.10 | 20.67 | 1.35 | 91.18  | 0.0824 |
| 0.68 | 46.40 | 19.37 | 1.41 | 87.78  | 0.0878 |
| 0.60 | 42.59 | 17.31 | 1.32 | 81.00  | 0.0839 |
| 0.60 | 42.59 | 17.29 | 1.32 | 38.34  | 0.0844 |
| 0.65 | 45.14 | 20.03 | 1.33 | 57.75  | 0.0827 |
| 0.59 | 41.91 | 17.48 | 1.29 | 74.70  | 0.0814 |
| 0.77 | 50.02 | 26.48 | 1.37 | 127.44 | 0.0808 |
| 0.61 | 43.01 | 16.36 | 1.38 | 95.55  | 0.0870 |
| 0.56 | 40.19 | 15.31 | 1.31 | 54.88  | 0.0843 |
| 0.60 | 42.67 | 15.85 | 1.38 | 97.28  | 0.0889 |
| 0.61 | 43.23 | 17.25 | 1.35 | 95.76  | 0.0851 |
| 0.60 | 42.90 | 19.42 | 1.26 | 50.17  | 0.0787 |
| 0.62 | 43.56 | 17.03 | 1.37 | 61.12  | 0.0874 |
| 0.62 | 43.69 | 17.88 | 1.34 | 63.36  | 0.0849 |
| 0.65 | 45.42 | 18.22 | 1.41 | 148.50 | 0.0876 |
| 0.50 | 35.71 | 14.09 | 1.21 | 22.08  | 0.0804 |
| 0.60 | 42.81 | 15.54 | 1.40 | 158.04 | 0.0899 |
| 0.66 | 45.79 | 20.26 | 1.35 | 75.60  | 0.0840 |
| 0.55 | 39.93 | 14.95 | 1.32 | 50.84  | 0.0845 |
| 0.54 | 39.29 | 14.09 | 1.33 | 121.23 | 0.0867 |
| 0.60 | 42.81 | 17.52 | 1.32 | 58.68  | 0.0829 |
| 0.51 | 36.96 | 15.90 | 1.18 | 161.25 | 0.0764 |
| 0.58 | 41.53 | 17.65 | 1.27 | 106.38 | 0.0803 |
| 0.60 | 42.67 | 18.52 | 1.28 | 243.52 | 0.0801 |
| 0.58 | 41.78 | 20.26 | 1.19 | 89.28  | 0.0732 |
| 0.56 | 40.57 | 15.24 | 1.33 | 56.10  | 0.0846 |
| 0.51 | 36.53 | 16.00 | 1.16 | 31.68  | 0.0746 |
| 0.58 | 41.56 | 14.37 | 1.41 | 37.12  | 0.0913 |
| 0.65 | 45.40 | 18.43 | 1.40 | 53.34  | 0.0873 |
| 0.56 | 40.05 | 14.81 | 1.33 | 195.00 | 0.0861 |
| 0.65 | 45.28 | 21.31 | 1.29 | 86.97  | 0.0792 |
| 0.62 | 43.56 | 19.28 | 1.29 | 90.24  | 0.0805 |
| 0.55 | 39.53 | 15.04 | 1.30 | 40.50  | 0.0837 |
| 0.52 | 37.60 | 17.08 | 1.16 | 13.77  | 0.0739 |

|      |       |       |      |        |        |
|------|-------|-------|------|--------|--------|
| 0.52 | 37.67 | 14.86 | 1.24 | 51.48  | 0.0797 |
| 0.51 | 36.53 | 16.44 | 1.15 | 14.58  | 0.0732 |
| 0.67 | 46.29 | 17.91 | 1.46 | 93.53  | 0.0913 |
| 0.56 | 40.42 | 15.36 | 1.32 | 31.64  | 0.0847 |
| 0.57 | 40.65 | 15.09 | 1.34 | 50.96  | 0.0864 |
| 0.49 | 35.21 | 11.55 | 1.32 | 28.26  | 0.0892 |
| 0.61 | 43.11 | 17.27 | 1.34 | 68.80  | 0.0852 |
| 0.58 | 41.65 | 17.67 | 1.27 | 56.70  | 0.0806 |
| 0.47 | 33.22 | 12.87 | 1.20 | 34.44  | 0.0792 |
| 0.51 | 36.82 | 12.99 | 1.30 | 17.85  | 0.0870 |
| 0.52 | 37.35 | 14.64 | 1.24 | 11.04  | 0.0815 |
| 0.60 | 42.80 | 14.87 | 1.43 | 36.12  | 0.0916 |
| 0.61 | 43.33 | 19.68 | 1.27 | 38.72  | 0.0788 |
| 0.41 | 26.79 | 10.74 | 1.14 | 10.05  | 0.0776 |
| 0.53 | 38.00 | 13.44 | 1.32 | 28.82  | 0.0868 |
| 0.52 | 37.46 | 13.18 | 1.31 | 35.76  | 0.0862 |
| 0.56 | 40.19 | 14.79 | 1.33 | 18.48  | 0.0863 |
| 0.51 | 36.77 | 15.36 | 1.19 | 26.40  | 0.0769 |
| 0.59 | 41.91 | 15.41 | 1.37 | 35.10  | 0.0886 |
| 0.46 | 32.94 | 13.16 | 1.17 | 9.10   | 0.0775 |
| 0.53 | 38.50 | 15.11 | 1.26 | 28.16  | 0.0815 |
| 0.57 | 40.71 | 16.30 | 1.29 | 44.01  | 0.0824 |
| 0.48 | 34.33 | 15.11 | 1.13 | 12.46  | 0.0734 |
| 0.69 | 47.13 | 20.04 | 1.42 | 108.03 | 0.0888 |
| 0.59 | 42.09 | 16.77 | 1.32 | 75.98  | 0.0844 |
| 0.60 | 42.74 | 17.84 | 1.31 | 41.93  | 0.0823 |
| 0.52 | 37.48 | 14.88 | 1.23 | 43.24  | 0.0797 |
| 0.55 | 39.46 | 14.81 | 1.30 | 30.82  | 0.0850 |
| 0.61 | 43.45 | 17.73 | 1.34 | 35.28  | 0.0842 |
| 0.58 | 41.48 | 16.73 | 1.30 | 36.40  | 0.0832 |
| 0.64 | 44.94 | 21.21 | 1.28 | 56.16  | 0.0789 |
| 0.53 | 38.13 | 16.07 | 1.21 | 19.21  | 0.0783 |
| 0.51 | 37.05 | 14.50 | 1.24 | 30.42  | 0.0809 |
| 0.56 | 40.05 | 17.86 | 1.21 | 18.98  | 0.0760 |
| 0.62 | 43.83 | 20.36 | 1.26 | 67.32  | 0.0781 |
| 0.50 | 36.00 | 12.82 | 1.28 | 26.22  | 0.0842 |
| 0.49 | 35.46 | 13.33 | 1.24 | 21.12  | 0.0820 |
| 0.53 | 37.98 | 14.54 | 1.27 | 55.66  | 0.0822 |
| 0.55 | 39.72 | 15.80 | 1.27 | 47.60  | 0.0813 |
| 0.60 | 42.81 | 15.68 | 1.40 | 41.25  | 0.0898 |
| 0.60 | 42.67 | 16.92 | 1.34 | 78.75  | 0.0846 |
| 0.59 | 42.29 | 14.52 | 1.43 | 78.74  | 0.0932 |
| 0.54 | 38.78 | 15.74 | 1.24 | 71.40  | 0.0802 |
| 0.66 | 45.60 | 19.08 | 1.38 | 91.14  | 0.0859 |
| 0.56 | 40.30 | 16.48 | 1.27 | 26.25  | 0.0817 |
| 0.62 | 43.73 | 15.72 | 1.43 | 55.80  | 0.0932 |
| 0.55 | 39.86 | 16.65 | 1.24 | 55.00  | 0.0793 |
| 0.46 | 32.52 | 13.33 | 1.16 | 10.67  | 0.0765 |
| 0.57 | 40.66 | 14.20 | 1.38 | 54.00  | 0.0897 |
| 0.56 | 40.53 | 13.51 | 1.41 | 51.52  | 0.0927 |
| 0.63 | 44.42 | 15.50 | 1.48 | 58.46  | 0.0952 |

|      |       |       |      |        |        |
|------|-------|-------|------|--------|--------|
| 0.52 | 37.39 | 14.87 | 1.23 | 27.09  | 0.0798 |
| 0.51 | 36.54 | 13.17 | 1.28 | 32.80  | 0.0853 |
| 0.48 | 34.73 | 13.16 | 1.23 | 26.25  | 0.0802 |
| 0.60 | 42.74 | 16.04 | 1.38 | 38.75  | 0.0886 |
| 0.61 | 42.97 | 17.31 | 1.33 | 76.57  | 0.0848 |
| 0.54 | 39.29 | 16.59 | 1.23 | 39.15  | 0.0778 |
| 0.47 | 33.14 | 12.44 | 1.21 | 18.24  | 0.0812 |
| 0.45 | 31.15 | 12.03 | 1.18 | 4.48   | 0.0796 |
| 0.66 | 45.89 | 19.79 | 1.37 | 64.40  | 0.0859 |
| 0.59 | 41.87 | 15.56 | 1.36 | 50.66  | 0.0872 |
| 0.57 | 40.88 | 14.03 | 1.40 | 26.32  | 0.0914 |
| 0.50 | 35.75 | 14.38 | 1.20 | 55.22  | 0.0776 |
| 0.55 | 39.59 | 15.37 | 1.29 | 17.60  | 0.0838 |
| 0.53 | 38.08 | 15.74 | 1.22 | 27.93  | 0.0788 |
| 0.63 | 44.35 | 19.52 | 1.31 | 96.36  | 0.0820 |
| 0.57 | 40.64 | 13.96 | 1.39 | 19.76  | 0.0914 |
| 0.57 | 41.00 | 15.94 | 1.31 | 45.36  | 0.0850 |
| 0.67 | 46.10 | 20.05 | 1.37 | 104.55 | 0.0849 |
| 0.58 | 41.56 | 18.07 | 1.25 | 46.08  | 0.0784 |
| 0.39 | 25.33 | 11.96 | 1.05 | 2.62   | 0.0704 |
| 0.58 | 41.65 | 15.72 | 1.35 | 49.30  | 0.0860 |
| 0.59 | 42.37 | 17.59 | 1.30 | 49.50  | 0.0819 |
| 0.43 | 29.23 | 11.67 | 1.15 | 6.09   | 0.0775 |
| 0.58 | 41.75 | 15.27 | 1.37 | 60.90  | 0.0888 |
| 0.57 | 40.76 | 16.19 | 1.29 | 52.78  | 0.0831 |
| 0.58 | 41.39 | 15.88 | 1.33 | 70.06  | 0.0851 |
| 0.55 | 39.75 | 14.10 | 1.35 | 22.00  | 0.0888 |
| 0.60 | 42.52 | 17.78 | 1.30 | 115.94 | 0.0820 |
| 0.54 | 39.17 | 15.39 | 1.27 | 50.64  | 0.0819 |
| 0.54 | 38.96 | 13.93 | 1.33 | 22.77  | 0.0872 |
| 0.55 | 39.93 | 14.38 | 1.34 | 27.56  | 0.0875 |
| 0.61 | 42.98 | 16.76 | 1.36 | 55.72  | 0.0872 |
| 0.63 | 44.18 | 18.95 | 1.32 | 120.00 | 0.0836 |
| 0.59 | 41.90 | 16.85 | 1.31 | 28.50  | 0.0842 |
| 0.52 | 37.54 | 15.11 | 1.23 | 20.40  | 0.0795 |
| 0.56 | 40.32 | 14.47 | 1.35 | 25.80  | 0.0876 |
| 0.42 | 28.12 | 11.54 | 1.13 | 8.96   | 0.0758 |
| 0.53 | 37.98 | 14.54 | 1.27 | 46.46  | 0.0822 |
| 0.57 | 41.18 | 16.21 | 1.31 | 36.75  | 0.0844 |
| 0.59 | 42.17 | 16.53 | 1.33 | 72.45  | 0.0865 |
| 0.55 | 39.79 | 15.81 | 1.27 | 73.37  | 0.0813 |
| 0.63 | 44.02 | 16.92 | 1.39 | 122.74 | 0.0884 |
| 0.59 | 41.84 | 18.14 | 1.26 | 43.09  | 0.0791 |
| 0.52 | 37.50 | 14.02 | 1.27 | 20.46  | 0.0831 |
| 0.54 | 39.25 | 16.83 | 1.22 | 36.30  | 0.0777 |
| 0.62 | 43.79 | 16.19 | 1.42 | 98.42  | 0.0904 |
| 0.53 | 37.98 | 14.35 | 1.27 | 16.79  | 0.0829 |
| 0.61 | 43.03 | 17.78 | 1.32 | 37.95  | 0.0832 |
| 0.54 | 38.65 | 14.50 | 1.29 | 164.75 | 0.0837 |
| 0.55 | 39.81 | 15.95 | 1.27 | 47.58  | 0.0813 |
| 0.59 | 42.05 | 17.67 | 1.29 | 51.24  | 0.0815 |

|      |       |       |      |        |        |
|------|-------|-------|------|--------|--------|
| 0.51 | 37.05 | 14.04 | 1.26 | 43.02  | 0.0827 |
| 0.51 | 36.67 | 13.71 | 1.26 | 10.37  | 0.0832 |
| 0.53 | 38.31 | 17.94 | 1.15 | 78.00  | 0.0726 |
| 0.53 | 38.53 | 12.96 | 1.36 | 67.20  | 0.0907 |
| 0.45 | 31.15 | 11.72 | 1.19 | 12.00  | 0.0809 |
| 0.53 | 38.34 | 14.43 | 1.28 | 33.63  | 0.0842 |
| 0.54 | 39.21 | 16.63 | 1.22 | 12.65  | 0.0781 |
| 0.58 | 41.52 | 16.30 | 1.32 | 30.16  | 0.0843 |
| 0.56 | 40.30 | 17.84 | 1.22 | 79.80  | 0.0775 |
| 0.62 | 43.50 | 17.38 | 1.35 | 65.74  | 0.0851 |
| 0.60 | 42.74 | 16.41 | 1.36 | 38.92  | 0.0877 |
| 0.54 | 39.26 | 14.20 | 1.33 | 57.40  | 0.0860 |
| 0.58 | 41.62 | 17.03 | 1.29 | 45.26  | 0.0819 |
| 0.54 | 38.75 | 14.63 | 1.29 | 50.38  | 0.0840 |
| 0.63 | 44.00 | 17.94 | 1.35 | 39.96  | 0.0851 |
| 0.51 | 37.03 | 14.52 | 1.24 | 29.60  | 0.0804 |
| 0.59 | 42.28 | 16.40 | 1.34 | 305.20 | 0.0864 |
| 0.57 | 41.19 | 16.41 | 1.30 | 37.95  | 0.0840 |
| 0.52 | 37.30 | 13.91 | 1.27 | 15.58  | 0.0836 |
| 0.58 | 41.45 | 16.66 | 1.30 | 55.50  | 0.0828 |
| 0.49 | 34.93 | 12.59 | 1.26 | 22.78  | 0.0837 |
| 0.48 | 33.89 | 11.79 | 1.27 | 17.64  | 0.0848 |
| 0.61 | 43.47 | 18.20 | 1.32 | 32.01  | 0.0832 |
| 0.56 | 40.29 | 15.11 | 1.32 | 58.76  | 0.0856 |
| 0.68 | 46.40 | 19.74 | 1.40 | 142.80 | 0.0866 |
| 0.63 | 44.48 | 17.06 | 1.41 | 60.86  | 0.0900 |
| 0.47 | 33.46 | 13.07 | 1.19 | 10.14  | 0.0791 |
| 0.62 | 43.74 | 17.19 | 1.37 | 59.85  | 0.0870 |
| 0.63 | 44.02 | 15.52 | 1.46 | 41.58  | 0.0944 |
| 0.43 | 29.97 | 11.35 | 1.18 | 9.20   | 0.0799 |
| 0.53 | 38.13 | 16.07 | 1.21 | 256.70 | 0.0783 |
| 0.56 | 40.49 | 17.49 | 1.24 | 123.69 | 0.0775 |
| 0.41 | 27.29 | 12.98 | 1.05 | 7.56   | 0.0694 |
| 0.47 | 33.12 | 13.98 | 1.14 | 14.25  | 0.0746 |
| 0.55 | 39.72 | 16.30 | 1.25 | 42.84  | 0.0796 |
| 0.64 | 44.72 | 18.26 | 1.37 | 91.80  | 0.0865 |
| 0.64 | 44.89 | 18.59 | 1.37 | 25.28  | 0.0866 |
| 0.67 | 46.11 | 15.94 | 1.54 | 59.85  | 0.1000 |
| 0.50 | 35.72 | 12.50 | 1.29 | 19.04  | 0.0867 |
| 0.45 | 31.82 | 13.88 | 1.11 | 10.98  | 0.0734 |
| 0.51 | 36.82 | 14.36 | 1.24 | 10.50  | 0.0814 |
| 0.51 | 36.99 | 12.68 | 1.32 | 35.65  | 0.0874 |
| 0.62 | 43.56 | 18.32 | 1.32 | 133.44 | 0.0833 |
| 0.51 | 37.00 | 13.43 | 1.28 | 34.32  | 0.0843 |
| 0.67 | 46.31 | 20.43 | 1.37 | 150.93 | 0.0848 |
| 0.53 | 38.25 | 13.42 | 1.33 | 52.80  | 0.0876 |
| 0.57 | 40.83 | 16.11 | 1.30 | 32.77  | 0.0830 |
| 0.40 | 26.15 | 10.09 | 1.16 | 9.54   | 0.0789 |
| 0.49 | 35.47 | 13.69 | 1.22 | 30.96  | 0.0803 |
| 0.58 | 41.45 | 14.52 | 1.39 | 59.70  | 0.0907 |
| 0.64 | 44.99 | 20.17 | 1.32 | 40.61  | 0.0825 |

|      |       |       |      |        |        |
|------|-------|-------|------|--------|--------|
| 0.53 | 38.50 | 15.41 | 1.25 | 29.26  | 0.0805 |
| 0.53 | 38.32 | 15.60 | 1.23 | 29.28  | 0.0790 |
| 0.44 | 30.35 | 13.66 | 1.09 | 4.64   | 0.0724 |
| 0.56 | 40.04 | 15.38 | 1.30 | 110.36 | 0.0832 |
| 0.46 | 32.42 | 11.89 | 1.22 | 11.34  | 0.0827 |
| 0.54 | 38.93 | 15.09 | 1.27 | 20.64  | 0.0824 |
| 0.71 | 47.73 | 22.98 | 1.35 | 86.48  | 0.0821 |
| 0.48 | 34.65 | 14.52 | 1.16 | 14.24  | 0.0757 |
| 0.60 | 42.44 | 14.78 | 1.42 | 46.69  | 0.0929 |
| 0.54 | 39.17 | 13.65 | 1.35 | 63.12  | 0.0888 |
| 0.54 | 39.29 | 15.80 | 1.26 | 30.51  | 0.0803 |
| 0.51 | 37.01 | 15.06 | 1.21 | 42.63  | 0.0783 |
| 0.58 | 41.68 | 16.27 | 1.33 | 50.40  | 0.0848 |
| 0.61 | 43.11 | 20.30 | 1.24 | 92.16  | 0.0766 |
| 0.62 | 43.61 | 19.35 | 1.29 | 57.46  | 0.0802 |
| 0.46 | 32.67 | 12.38 | 1.20 | 20.44  | 0.0801 |
| 0.59 | 42.36 | 15.42 | 1.39 | 42.60  | 0.0899 |
| 0.54 | 39.26 | 15.21 | 1.28 | 26.32  | 0.0822 |
| 0.63 | 44.15 | 19.97 | 1.29 | 16.40  | 0.0822 |
| 0.55 | 39.86 | 14.22 | 1.35 | 98.25  | 0.0881 |
| 0.45 | 31.43 | 12.38 | 1.17 | 10.80  | 0.0779 |
| 0.68 | 46.41 | 16.73 | 1.52 | 55.20  | 0.0971 |
| 0.48 | 34.38 | 14.24 | 1.17 | 11.68  | 0.0761 |
| 0.54 | 39.13 | 15.50 | 1.26 | 44.50  | 0.0813 |
| 0.70 | 47.25 | 19.22 | 1.46 | 41.80  | 0.0919 |
| 0.60 | 42.44 | 16.85 | 1.33 | 157.44 | 0.0847 |
| 0.54 | 38.82 | 15.25 | 1.26 | 22.00  | 0.0822 |
| 0.50 | 35.74 | 12.84 | 1.27 | 17.64  | 0.0844 |
| 0.62 | 43.61 | 18.94 | 1.30 | 45.60  | 0.0819 |
| 0.47 | 33.01 | 12.68 | 1.20 | 9.46   | 0.0793 |
| 0.42 | 28.79 | 11.20 | 1.16 | 14.00  | 0.0782 |
| 0.70 | 47.29 | 20.01 | 1.43 | 54.61  | 0.0888 |
| 0.48 | 34.33 | 13.63 | 1.19 | 25.06  | 0.0786 |
| 0.56 | 40.05 | 15.97 | 1.28 | 58.50  | 0.0819 |
| 0.68 | 46.60 | 18.26 | 1.46 | 967.68 | 0.0920 |
| 0.56 | 40.60 | 15.61 | 1.31 | 49.88  | 0.0842 |
| 0.57 | 41.11 | 13.18 | 1.45 | 40.64  | 0.0953 |
| 0.47 | 33.14 | 12.15 | 1.23 | 17.52  | 0.0825 |
| 0.52 | 37.28 | 14.52 | 1.24 | 21.20  | 0.0810 |
| 0.63 | 44.18 | 18.22 | 1.35 | 60.30  | 0.0858 |
| 0.51 | 36.57 | 14.46 | 1.22 | 11.16  | 0.0810 |
| 0.57 | 40.63 | 14.43 | 1.37 | 28.56  | 0.0897 |
| 0.50 | 36.00 | 12.70 | 1.29 | 32.12  | 0.0850 |
| 0.49 | 35.21 | 12.76 | 1.26 | 16.20  | 0.0835 |
| 0.62 | 43.83 | 18.51 | 1.33 | 161.50 | 0.0832 |
| 0.56 | 39.98 | 16.43 | 1.26 | 34.75  | 0.0803 |
| 0.52 | 37.54 | 10.37 | 1.48 | 35.00  | 0.1022 |
| 0.38 | 23.24 | 13.82 | 0.94 | 0.00   | 0.0613 |
| 0.58 | 41.48 | 16.34 | 1.31 | 43.16  | 0.0846 |
| 0.60 | 42.74 | 18.54 | 1.28 | 49.60  | 0.0804 |
| 0.46 | 32.57 | 12.53 | 1.19 | 19.80  | 0.0796 |

|      |       |       |      |        |        |
|------|-------|-------|------|--------|--------|
| 0.42 | 28.00 | 11.39 | 1.13 | 1.68   | 0.0775 |
| 0.53 | 38.19 | 15.22 | 1.24 | 24.15  | 0.0816 |
| 0.64 | 44.66 | 18.22 | 1.37 | 54.60  | 0.0859 |
| 0.58 | 41.24 | 17.35 | 1.27 | 200.98 | 0.0806 |
| 0.63 | 44.09 | 18.16 | 1.35 | 136.09 | 0.0856 |
| 0.61 | 43.11 | 16.97 | 1.35 | 25.28  | 0.0863 |
| 0.60 | 42.74 | 16.48 | 1.36 | 63.27  | 0.0860 |
| 0.59 | 42.37 | 13.41 | 1.49 | 13.55  | 0.0984 |
| 0.61 | 43.23 | 16.98 | 1.36 | 28.44  | 0.0860 |
| 0.41 | 27.11 | 10.95 | 1.13 | 5.15   | 0.0772 |
| 0.48 | 34.40 | 12.91 | 1.23 | 19.38  | 0.0811 |
| 0.62 | 43.58 | 17.52 | 1.35 | 58.09  | 0.0851 |
| 0.58 | 41.45 | 16.09 | 1.32 | 38.10  | 0.0847 |
| 0.57 | 41.16 | 15.66 | 1.33 | 141.71 | 0.0843 |
| 0.57 | 41.17 | 14.90 | 1.36 | 97.03  | 0.0881 |
| 0.53 | 37.90 | 13.67 | 1.30 | 44.72  | 0.0849 |
| 0.55 | 39.69 | 13.73 | 1.36 | 41.08  | 0.0895 |
| 0.64 | 44.70 | 17.41 | 1.40 | 54.06  | 0.0895 |
| 0.63 | 44.42 | 15.50 | 1.48 | 37.74  | 0.0952 |
| 0.54 | 38.62 | 14.73 | 1.28 | 25.48  | 0.0826 |
| 0.57 | 40.76 | 14.19 | 1.38 | 69.94  | 0.0907 |
| 0.57 | 41.18 | 13.16 | 1.45 | 38.75  | 0.0969 |
| 0.54 | 38.82 | 15.74 | 1.24 | 78.20  | 0.0805 |
| 0.66 | 45.80 | 17.43 | 1.46 | 87.60  | 0.0923 |
| 0.48 | 34.43 | 14.45 | 1.16 | 9.36   | 0.0762 |
| 0.50 | 35.73 | 13.60 | 1.24 | 24.48  | 0.0815 |
| 0.46 | 32.71 | 12.22 | 1.21 | 10.20  | 0.0807 |
| 0.55 | 39.58 | 11.84 | 1.46 | 31.97  | 0.0991 |
| 0.52 | 37.43 | 11.39 | 1.41 | 15.77  | 0.0959 |
| 0.57 | 40.63 | 15.74 | 1.31 | 29.28  | 0.0846 |
| 0.49 | 35.35 | 11.66 | 1.32 | 104.50 | 0.0888 |
| 0.57 | 40.65 | 14.81 | 1.35 | 57.12  | 0.0875 |
| 0.52 | 37.25 | 14.77 | 1.23 | 19.80  | 0.0797 |
| 0.53 | 38.56 | 13.82 | 1.32 | 71.80  | 0.0871 |
| 0.60 | 42.81 | 18.01 | 1.30 | 22.77  | 0.0819 |
| 0.65 | 45.17 | 19.13 | 1.36 | 48.64  | 0.0850 |
| 0.42 | 28.00 | 11.72 | 1.12 | 3.16   | 0.0760 |
| 0.50 | 36.00 | 13.78 | 1.24 | 24.14  | 0.0813 |
| 0.55 | 39.61 | 13.65 | 1.36 | 45.25  | 0.0899 |
| 0.39 | 25.03 | 11.12 | 1.08 | 5.96   | 0.0730 |
| 0.52 | 37.27 | 14.66 | 1.24 | 16.17  | 0.0803 |
| 0.67 | 46.00 | 19.09 | 1.40 | 55.48  | 0.0878 |
| 0.52 | 37.75 | 13.68 | 1.30 | 35.20  | 0.0852 |
| 0.62 | 43.82 | 17.31 | 1.37 | 23.78  | 0.0878 |
| 0.52 | 37.85 | 13.29 | 1.32 | 33.58  | 0.0869 |
| 0.50 | 36.00 | 11.47 | 1.35 | 35.20  | 0.0909 |
| 0.62 | 43.78 | 18.70 | 1.32 | 55.68  | 0.0828 |
| 0.49 | 35.43 | 12.99 | 1.25 | 11.04  | 0.0841 |
| 0.45 | 31.65 | 11.25 | 1.23 | 11.11  | 0.0837 |
| 0.48 | 34.63 | 15.16 | 1.14 | 19.65  | 0.0737 |
| 0.59 | 42.07 | 16.85 | 1.32 | 198.40 | 0.0837 |

|      |       |       |      |        |        |
|------|-------|-------|------|--------|--------|
| 0.50 | 36.28 | 14.02 | 1.23 | 28.00  | 0.0816 |
| 0.55 | 39.61 | 15.68 | 1.27 | 25.75  | 0.0819 |
| 0.61 | 43.03 | 17.93 | 1.31 | 48.84  | 0.0828 |
| 0.56 | 40.05 | 13.65 | 1.38 | 56.68  | 0.0909 |
| 0.50 | 36.00 | 13.18 | 1.26 | 13.32  | 0.0836 |
| 0.58 | 41.38 | 18.56 | 1.23 | 20.90  | 0.0781 |
| 0.48 | 34.00 | 13.85 | 1.17 | 11.88  | 0.0774 |
| 0.56 | 40.58 | 14.17 | 1.38 | 62.25  | 0.0905 |
| 0.50 | 36.25 | 13.43 | 1.26 | 39.82  | 0.0824 |
| 0.60 | 42.48 | 17.61 | 1.30 | 36.00  | 0.0826 |
| 0.56 | 40.44 | 16.36 | 1.28 | 98.24  | 0.0807 |
| 0.57 | 41.09 | 16.91 | 1.28 | 24.99  | 0.0818 |
| 0.52 | 37.50 | 13.01 | 1.32 | 17.82  | 0.0874 |
| 0.61 | 43.08 | 16.48 | 1.37 | 59.28  | 0.0869 |
| 0.60 | 42.48 | 16.83 | 1.33 | 38.10  | 0.0852 |
| 0.53 | 38.20 | 15.84 | 1.22 | 20.64  | 0.0780 |
| 0.50 | 36.00 | 14.10 | 1.22 | 36.00  | 0.0799 |
| 0.57 | 40.65 | 14.75 | 1.35 | 82.88  | 0.0877 |
| 0.49 | 35.36 | 13.56 | 1.23 | 19.20  | 0.0802 |
| 0.50 | 36.00 | 11.59 | 1.35 | 49.80  | 0.0907 |
| 0.50 | 36.00 | 16.59 | 1.13 | 12.00  | 0.0714 |
| 0.61 | 43.10 | 17.59 | 1.33 | 46.90  | 0.0837 |
| 0.63 | 44.21 | 18.56 | 1.34 | 120.62 | 0.0838 |
| 0.50 | 35.72 | 15.73 | 1.15 | 11.31  | 0.0745 |
| 0.48 | 34.13 | 12.79 | 1.23 | 34.68  | 0.0810 |
| 0.52 | 37.85 | 15.18 | 1.23 | 66.70  | 0.0795 |
| 0.67 | 46.21 | 23.60 | 1.27 | 39.52  | 0.0769 |
| 0.60 | 42.74 | 16.66 | 1.35 | 24.49  | 0.0864 |
| 0.65 | 45.26 | 17.58 | 1.42 | 21.46  | 0.0904 |
| 0.58 | 41.39 | 16.15 | 1.32 | 117.18 | 0.0842 |
| 0.58 | 41.37 | 16.07 | 1.32 | 65.28  | 0.0856 |
| 0.64 | 44.60 | 16.66 | 1.43 | 45.36  | 0.0929 |
| 0.51 | 36.53 | 15.08 | 1.20 | 11.90  | 0.0777 |
| 0.51 | 36.77 | 13.82 | 1.26 | 15.80  | 0.0825 |
| 0.53 | 38.08 | 13.82 | 1.30 | 32.87  | 0.0860 |
| 0.53 | 38.41 | 14.75 | 1.27 | 61.75  | 0.0821 |
| 0.53 | 38.16 | 14.58 | 1.27 | 66.08  | 0.0837 |
| 0.50 | 36.27 | 14.48 | 1.21 | 16.32  | 0.0795 |
| 0.56 | 40.39 | 16.39 | 1.27 | 49.92  | 0.0817 |
| 0.62 | 43.56 | 17.03 | 1.37 | 31.36  | 0.0874 |
| 0.55 | 39.75 | 16.73 | 1.24 | 26.62  | 0.0793 |
| 0.50 | 36.00 | 12.87 | 1.28 | 36.29  | 0.0847 |
| 0.58 | 41.78 | 16.15 | 1.33 | 46.08  | 0.0851 |
| 0.62 | 43.78 | 16.07 | 1.42 | 40.64  | 0.0916 |
| 0.55 | 39.72 | 15.80 | 1.27 | 31.08  | 0.0813 |
| 0.58 | 41.23 | 18.15 | 1.24 | 46.80  | 0.0776 |
| 0.47 | 33.12 | 14.48 | 1.12 | 29.55  | 0.0729 |
| 0.58 | 41.56 | 16.11 | 1.33 | 270.08 | 0.0846 |
| 0.56 | 40.44 | 14.06 | 1.38 | 34.56  | 0.0893 |
| 0.55 | 39.53 | 16.11 | 1.25 | 59.67  | 0.0799 |
| 0.63 | 44.09 | 19.26 | 1.31 | 51.12  | 0.0815 |

|      |       |       |      |        |        |
|------|-------|-------|------|--------|--------|
| 0.58 | 41.27 | 15.97 | 1.32 | 49.83  | 0.0841 |
| 0.58 | 41.43 | 17.17 | 1.28 | 78.20  | 0.0805 |
| 0.56 | 40.05 | 16.27 | 1.27 | 60.32  | 0.0809 |
| 0.50 | 36.00 | 13.28 | 1.26 | 19.76  | 0.0830 |
| 0.62 | 43.78 | 15.58 | 1.44 | 64.56  | 0.0925 |
| 0.37 | 22.03 | 10.15 | 1.07 | 0.00   | 0.0734 |
| 0.53 | 38.29 | 13.76 | 1.31 | 13.92  | 0.0882 |
| 0.54 | 39.04 | 15.10 | 1.28 | 18.69  | 0.0831 |
| 0.51 | 36.53 | 11.85 | 1.35 | 52.92  | 0.0911 |
| 0.67 | 46.00 | 17.48 | 1.46 | 93.44  | 0.0942 |
| 0.52 | 37.30 | 14.21 | 1.26 | 10.26  | 0.0824 |
| 0.49 | 35.50 | 12.23 | 1.30 | 12.10  | 0.0859 |
| 0.53 | 37.93 | 12.63 | 1.36 | 64.00  | 0.0898 |
| 0.51 | 37.01 | 13.53 | 1.28 | 19.74  | 0.0841 |
| 0.47 | 33.26 | 11.33 | 1.28 | 17.55  | 0.0862 |
| 0.39 | 24.83 | 9.40  | 1.17 | 1.86   | 0.0817 |
| 0.59 | 42.28 | 18.37 | 1.27 | 123.76 | 0.0801 |
| 0.49 | 34.95 | 13.17 | 1.23 | 16.92  | 0.0811 |
| 0.62 | 43.64 | 16.41 | 1.40 | 70.37  | 0.0901 |
| 0.59 | 42.05 | 18.22 | 1.27 | 25.20  | 0.0799 |
| 0.59 | 41.84 | 16.23 | 1.33 | 56.42  | 0.0852 |
| 0.59 | 42.18 | 16.31 | 1.34 | 84.80  | 0.0857 |
| 0.46 | 32.71 | 12.68 | 1.19 | 15.75  | 0.0787 |
| 0.52 | 37.84 | 15.91 | 1.21 | 45.90  | 0.0779 |
| 0.52 | 37.35 | 15.22 | 1.22 | 40.96  | 0.0794 |
| 0.47 | 33.75 | 12.77 | 1.22 | 11.05  | 0.0810 |
| 0.54 | 39.17 | 13.94 | 1.33 | 40.08  | 0.0875 |
| 0.58 | 41.65 | 16.39 | 1.32 | 30.78  | 0.0847 |
| 0.54 | 38.96 | 16.59 | 1.22 | 20.24  | 0.0776 |
| 0.56 | 40.00 | 14.35 | 1.35 | 42.88  | 0.0868 |
| 0.51 | 36.55 | 13.06 | 1.29 | 20.70  | 0.0860 |
| 0.59 | 42.25 | 17.48 | 1.30 | 12.54  | 0.0837 |
| 0.65 | 45.05 | 18.57 | 1.38 | 47.36  | 0.0864 |
| 0.59 | 42.17 | 15.42 | 1.38 | 50.40  | 0.0883 |
| 0.49 | 35.44 | 14.56 | 1.19 | 14.28  | 0.0777 |
| 0.48 | 34.40 | 13.83 | 1.19 | 25.33  | 0.0775 |
| 0.48 | 34.18 | 11.43 | 1.30 | 25.08  | 0.0871 |
| 0.53 | 38.30 | 11.34 | 1.45 | 28.13  | 0.0968 |
| 0.55 | 39.33 | 16.76 | 1.22 | 27.00  | 0.0785 |
| 0.53 | 38.31 | 15.71 | 1.23 | 63.60  | 0.0793 |
| 0.52 | 37.37 | 15.16 | 1.22 | 19.20  | 0.0798 |
| 0.70 | 47.54 | 20.98 | 1.41 | 65.32  | 0.0866 |
| 0.52 | 37.23 | 13.44 | 1.29 | 31.51  | 0.0847 |
| 0.63 | 44.48 | 19.68 | 1.31 | 118.32 | 0.0818 |
| 0.59 | 42.28 | 16.27 | 1.35 | 65.52  | 0.0855 |
| 0.46 | 32.38 | 11.76 | 1.23 | 7.48   | 0.0828 |
| 0.60 | 42.59 | 17.38 | 1.32 | 90.00  | 0.0837 |
| 0.49 | 34.97 | 13.31 | 1.23 | 9.40   | 0.0803 |
| 0.41 | 26.95 | 12.11 | 1.08 | 4.80   | 0.0719 |
| 0.53 | 38.05 | 16.04 | 1.21 | 35.20  | 0.0776 |
| 0.44 | 30.49 | 11.89 | 1.17 | 8.25   | 0.0783 |

|      |       |       |      |        |        |
|------|-------|-------|------|--------|--------|
| 0.51 | 36.96 | 11.78 | 1.37 | 63.25  | 0.0913 |
| 0.55 | 39.95 | 15.58 | 1.29 | 35.56  | 0.0827 |
| 0.56 | 40.29 | 17.78 | 1.22 | 40.56  | 0.0768 |
| 0.53 | 37.98 | 14.81 | 1.25 | 166.52 | 0.0812 |
| 0.60 | 42.52 | 15.06 | 1.41 | 103.70 | 0.0912 |
| 0.51 | 36.49 | 13.92 | 1.25 | 38.87  | 0.0809 |
| 0.59 | 42.29 | 17.19 | 1.31 | 38.75  | 0.0833 |
| 0.59 | 42.29 | 16.89 | 1.32 | 67.27  | 0.0843 |
| 0.52 | 37.75 | 15.36 | 1.22 | 102.74 | 0.0788 |
| 0.56 | 40.10 | 14.58 | 1.34 | 68.40  | 0.0883 |
| 0.57 | 40.76 | 12.65 | 1.46 | 25.22  | 0.0979 |
| 0.46 | 32.67 | 13.70 | 1.14 | 24.92  | 0.0749 |
| 0.55 | 39.50 | 13.50 | 1.37 | 49.06  | 0.0908 |
| 0.52 | 37.67 | 14.62 | 1.25 | 33.28  | 0.0806 |
| 0.54 | 39.12 | 13.80 | 1.34 | 23.75  | 0.0889 |
| 0.58 | 41.58 | 15.73 | 1.34 | 29.96  | 0.0867 |
| 0.44 | 30.46 | 11.72 | 1.18 | 9.31   | 0.0797 |
| 0.51 | 36.77 | 14.52 | 1.23 | 33.00  | 0.0798 |
| 0.58 | 41.52 | 16.89 | 1.29 | 19.14  | 0.0824 |
| 0.50 | 35.74 | 12.29 | 1.30 | 14.40  | 0.0869 |
| 0.56 | 40.05 | 16.24 | 1.27 | 43.89  | 0.0818 |
| 0.52 | 37.71 | 14.73 | 1.25 | 18.96  | 0.0806 |
| 0.61 | 43.47 | 16.46 | 1.39 | 44.77  | 0.0884 |
| 0.51 | 36.79 | 14.81 | 1.22 | 43.56  | 0.0791 |
| 0.44 | 30.77 | 11.65 | 1.19 | 6.02   | 0.0807 |
| 0.41 | 27.43 | 10.61 | 1.16 | 8.90   | 0.0795 |
| 0.54 | 39.17 | 13.65 | 1.35 | 27.84  | 0.0888 |
| 0.57 | 41.00 | 14.79 | 1.36 | 71.10  | 0.0883 |
| 0.51 | 36.53 | 12.74 | 1.30 | 45.90  | 0.0868 |
| 0.61 | 43.42 | 16.99 | 1.37 | 62.79  | 0.0861 |
| 0.59 | 42.19 | 18.16 | 1.27 | 31.72  | 0.0808 |
| 0.44 | 30.13 | 12.74 | 1.12 | 4.90   | 0.0752 |
| 0.70 | 47.52 | 24.91 | 1.29 | 103.36 | 0.0787 |
| 0.58 | 41.48 | 18.37 | 1.24 | 33.80  | 0.0782 |
| 0.59 | 41.93 | 16.36 | 1.33 | 44.16  | 0.0863 |
| 0.53 | 38.59 | 15.96 | 1.23 | 21.62  | 0.0787 |
| 0.53 | 38.44 | 13.52 | 1.33 | 65.80  | 0.0881 |
| 0.53 | 37.93 | 12.93 | 1.34 | 36.75  | 0.0884 |
| 0.52 | 37.54 | 13.33 | 1.31 | 49.60  | 0.0864 |
| 0.71 | 47.96 | 20.15 | 1.46 | 216.09 | 0.0900 |
| 0.62 | 43.91 | 18.32 | 1.34 | 37.29  | 0.0842 |
| 0.58 | 41.27 | 14.50 | 1.39 | 60.72  | 0.0897 |
| 0.55 | 39.37 | 15.69 | 1.26 | 15.25  | 0.0813 |
| 0.50 | 36.26 | 14.50 | 1.21 | 19.40  | 0.0787 |
| 0.55 | 39.87 | 13.92 | 1.36 | 47.95  | 0.0878 |
| 0.50 | 35.75 | 13.90 | 1.22 | 14.96  | 0.0794 |
| 0.57 | 41.06 | 17.71 | 1.25 | 45.75  | 0.0792 |
| 0.54 | 38.80 | 16.92 | 1.20 | 21.60  | 0.0760 |
| 0.57 | 40.63 | 17.58 | 1.24 | 32.40  | 0.0786 |
| 0.58 | 41.65 | 15.21 | 1.37 | 214.20 | 0.0879 |
| 0.70 | 47.58 | 22.76 | 1.35 | 58.09  | 0.0833 |

|      |       |       |      |        |        |
|------|-------|-------|------|--------|--------|
| 0.48 | 34.57 | 11.15 | 1.33 | 13.80  | 0.0909 |
| 0.61 | 43.44 | 18.99 | 1.29 | 41.72  | 0.0816 |
| 0.61 | 43.21 | 16.77 | 1.37 | 73.36  | 0.0879 |
| 0.62 | 43.87 | 20.86 | 1.25 | 120.90 | 0.0774 |
| 0.64 | 44.57 | 17.25 | 1.41 | 51.60  | 0.0887 |
| 0.47 | 33.63 | 12.46 | 1.23 | 16.56  | 0.0811 |
| 0.54 | 39.00 | 14.81 | 1.29 | 26.84  | 0.0840 |
| 0.61 | 42.98 | 15.72 | 1.40 | 89.32  | 0.0910 |
| 0.60 | 42.59 | 15.95 | 1.38 | 50.82  | 0.0881 |
| 0.49 | 35.29 | 13.03 | 1.25 | 9.84   | 0.0836 |
| 0.39 | 24.62 | 9.37  | 1.17 | 0.00   | 0.0820 |
| 0.70 | 47.30 | 19.74 | 1.44 | 63.00  | 0.0887 |
| 0.55 | 39.75 | 13.45 | 1.38 | 13.64  | 0.0917 |
| 0.54 | 39.00 | 14.81 | 1.29 | 100.32 | 0.0840 |
| 0.58 | 41.43 | 16.42 | 1.31 | 127.50 | 0.0829 |
| 0.49 | 35.21 | 13.16 | 1.24 | 37.80  | 0.0818 |
| 0.58 | 41.47 | 17.00 | 1.29 | 50.32  | 0.0807 |
| 0.59 | 42.30 | 17.45 | 1.30 | 29.24  | 0.0820 |
| 0.51 | 36.78 | 14.52 | 1.23 | 15.01  | 0.0800 |
| 0.58 | 41.71 | 14.75 | 1.39 | 26.40  | 0.0901 |
| 0.63 | 44.04 | 17.94 | 1.36 | 20.74  | 0.0856 |
| 0.71 | 47.81 | 19.74 | 1.46 | 48.88  | 0.0910 |
| 0.53 | 38.56 | 15.42 | 1.25 | 19.80  | 0.0809 |
| 0.46 | 32.76 | 12.45 | 1.20 | 21.12  | 0.0796 |
| 0.46 | 32.57 | 14.24 | 1.12 | 29.16  | 0.0731 |
| 0.67 | 46.00 | 20.44 | 1.35 | 98.28  | 0.0833 |
| 0.49 | 35.14 | 12.48 | 1.27 | 11.52  | 0.0857 |
| 0.53 | 37.90 | 12.94 | 1.34 | 19.76  | 0.0881 |
| 0.75 | 49.16 | 24.57 | 1.38 | 61.60  | 0.0821 |
| 0.43 | 29.54 | 12.20 | 1.13 | 5.74   | 0.0758 |
| 0.60 | 42.73 | 15.01 | 1.42 | 43.60  | 0.0911 |
| 0.56 | 40.00 | 15.78 | 1.28 | 119.07 | 0.0823 |
| 0.48 | 34.36 | 12.53 | 1.24 | 24.75  | 0.0830 |
| 0.50 | 36.00 | 14.24 | 1.22 | 25.56  | 0.0794 |
| 0.49 | 34.89 | 14.50 | 1.17 | 26.60  | 0.0766 |
| 0.52 | 37.79 | 15.66 | 1.21 | 50.60  | 0.0783 |
| 0.42 | 28.00 | 10.54 | 1.18 | 9.73   | 0.0805 |
| 0.46 | 32.90 | 13.12 | 1.18 | 26.39  | 0.0777 |
| 0.53 | 38.12 | 14.02 | 1.29 | 15.05  | 0.0855 |
| 0.55 | 39.81 | 15.66 | 1.28 | 23.14  | 0.0823 |
| 0.56 | 40.60 | 16.43 | 1.28 | 67.28  | 0.0813 |
| 0.46 | 32.29 | 12.01 | 1.21 | 9.72   | 0.0813 |
| 0.44 | 30.77 | 11.33 | 1.21 | 9.31   | 0.0822 |
| 0.54 | 38.65 | 16.38 | 1.21 | 34.25  | 0.0772 |
| 0.50 | 36.00 | 14.52 | 1.20 | 31.50  | 0.0783 |
| 0.57 | 41.12 | 15.05 | 1.36 | 29.04  | 0.0886 |
| 0.49 | 35.43 | 11.53 | 1.33 | 15.48  | 0.0911 |
| 0.52 | 37.62 | 13.27 | 1.31 | 15.04  | 0.0877 |
| 0.57 | 40.88 | 15.68 | 1.32 | 62.72  | 0.0849 |
| 0.72 | 48.08 | 20.61 | 1.45 | 125.76 | 0.0893 |
| 0.55 | 39.90 | 15.12 | 1.31 | 30.24  | 0.0849 |

|      |       |       |      |        |        |
|------|-------|-------|------|--------|--------|
| 0.65 | 45.39 | 18.96 | 1.38 | 54.80  | 0.0859 |
| 0.55 | 39.91 | 15.35 | 1.30 | 29.87  | 0.0832 |
| 0.56 | 40.60 | 15.17 | 1.33 | 31.03  | 0.0858 |
| 0.41 | 27.21 | 12.88 | 1.05 | 0.00   | 0.0704 |
| 0.62 | 43.74 | 16.89 | 1.38 | 53.55  | 0.0880 |
| 0.55 | 39.92 | 14.66 | 1.33 | 34.19  | 0.0866 |
| 0.60 | 42.67 | 17.19 | 1.33 | 42.56  | 0.0842 |
| 0.56 | 40.05 | 17.43 | 1.22 | 34.58  | 0.0773 |
| 0.52 | 37.48 | 13.17 | 1.31 | 19.55  | 0.0864 |
| 0.56 | 40.14 | 15.54 | 1.30 | 78.59  | 0.0832 |
| 0.58 | 41.38 | 16.16 | 1.32 | 107.45 | 0.0835 |
| 0.47 | 33.14 | 12.74 | 1.20 | 25.20  | 0.0800 |
| 0.70 | 47.31 | 19.28 | 1.46 | 59.04  | 0.0915 |
| 0.57 | 40.94 | 17.23 | 1.26 | 56.16  | 0.0800 |
| 0.61 | 43.11 | 20.05 | 1.25 | 71.68  | 0.0772 |
| 0.57 | 41.13 | 14.71 | 1.37 | 22.20  | 0.0908 |
| 0.47 | 33.71 | 13.73 | 1.17 | 15.48  | 0.0773 |
| 0.60 | 42.74 | 16.19 | 1.37 | 54.25  | 0.0880 |
| 0.51 | 37.07 | 14.78 | 1.23 | 99.28  | 0.0801 |
| 0.42 | 28.31 | 10.20 | 1.20 | 10.57  | 0.0828 |
| 0.60 | 42.88 | 18.62 | 1.28 | 52.85  | 0.0800 |
| 0.52 | 37.56 | 12.96 | 1.33 | 14.25  | 0.0884 |
| 0.56 | 40.05 | 15.39 | 1.30 | 32.76  | 0.0839 |
| 0.72 | 48.14 | 19.66 | 1.49 | 36.40  | 0.0936 |
| 0.61 | 43.42 | 15.91 | 1.41 | 25.73  | 0.0912 |
| 0.53 | 38.20 | 15.17 | 1.25 | 31.44  | 0.0802 |
| 0.55 | 39.41 | 15.69 | 1.27 | 44.01  | 0.0810 |
| 0.52 | 37.67 | 13.42 | 1.31 | 58.50  | 0.0854 |
| 0.58 | 41.24 | 16.71 | 1.29 | 44.98  | 0.0827 |
| 0.54 | 38.82 | 14.10 | 1.31 | 22.40  | 0.0866 |
| 0.61 | 43.27 | 19.42 | 1.27 | 31.50  | 0.0796 |
| 0.61 | 43.31 | 20.01 | 1.26 | 61.07  | 0.0782 |
| 0.59 | 41.88 | 17.38 | 1.29 | 40.77  | 0.0821 |
| 0.62 | 43.56 | 18.32 | 1.32 | 100.80 | 0.0833 |
| 0.53 | 38.11 | 13.06 | 1.34 | 16.38  | 0.0895 |
| 0.54 | 39.04 | 15.10 | 1.28 | 57.96  | 0.0831 |
| 0.50 | 36.26 | 13.07 | 1.28 | 12.78  | 0.0847 |
| 0.55 | 39.66 | 15.72 | 1.27 | 29.28  | 0.0821 |
| 0.50 | 35.73 | 14.21 | 1.21 | 22.88  | 0.0792 |
| 0.60 | 42.44 | 16.85 | 1.33 | 45.44  | 0.0847 |
| 0.60 | 42.67 | 18.37 | 1.28 | 298.56 | 0.0805 |
| 0.63 | 44.00 | 18.51 | 1.33 | 64.01  | 0.0833 |
| 0.62 | 43.83 | 20.05 | 1.27 | 41.14  | 0.0789 |
| 0.59 | 42.38 | 16.23 | 1.36 | 64.44  | 0.0860 |
| 0.54 | 39.26 | 14.20 | 1.33 | 42.28  | 0.0860 |
| 0.46 | 32.29 | 15.08 | 1.08 | 5.04   | 0.0698 |
| 0.51 | 37.11 | 15.67 | 1.19 | 20.30  | 0.0776 |
| 0.51 | 36.50 | 13.94 | 1.24 | 18.26  | 0.0810 |
| 0.52 | 37.19 | 14.09 | 1.26 | 115.44 | 0.0814 |
| 0.57 | 40.76 | 16.66 | 1.28 | 34.32  | 0.0815 |
| 0.61 | 43.37 | 16.11 | 1.40 | 66.23  | 0.0893 |

|      |       |       |      |        |        |
|------|-------|-------|------|--------|--------|
| 0.59 | 42.22 | 16.52 | 1.34 | 101.12 | 0.0852 |
| 0.57 | 40.76 | 16.04 | 1.30 | 56.16  | 0.0836 |
| 0.48 | 34.31 | 13.20 | 1.21 | 10.14  | 0.0804 |
| 0.59 | 42.21 | 15.90 | 1.36 | 56.84  | 0.0878 |
| 0.61 | 43.37 | 16.11 | 1.40 | 91.02  | 0.0893 |
| 0.56 | 40.52 | 16.93 | 1.26 | 158.08 | 0.0800 |
| 0.46 | 32.23 | 11.62 | 1.23 | 12.54  | 0.0832 |
| 0.53 | 38.56 | 14.14 | 1.30 | 59.00  | 0.0858 |
| 0.59 | 42.29 | 16.00 | 1.36 | 46.19  | 0.0873 |
| 0.61 | 43.03 | 17.48 | 1.33 | 49.83  | 0.0842 |
| 0.50 | 36.00 | 13.43 | 1.25 | 59.84  | 0.0818 |
| 0.57 | 40.76 | 16.04 | 1.30 | 73.32  | 0.0836 |
| 0.49 | 34.84 | 13.97 | 1.19 | 12.32  | 0.0790 |
| 0.56 | 40.29 | 16.89 | 1.25 | 77.48  | 0.0795 |
| 0.57 | 41.11 | 15.76 | 1.32 | 75.20  | 0.0846 |
| 0.55 | 39.90 | 15.27 | 1.30 | 16.72  | 0.0852 |
| 0.67 | 46.00 | 18.89 | 1.41 | 96.00  | 0.0881 |
| 0.50 | 36.27 | 15.43 | 1.18 | 16.48  | 0.0762 |
| 0.60 | 42.74 | 16.23 | 1.37 | 32.56  | 0.0869 |
| 0.59 | 42.22 | 12.53 | 1.53 | 71.36  | 0.1024 |
| 0.58 | 41.52 | 15.70 | 1.34 | 37.70  | 0.0864 |
| 0.45 | 32.00 | 12.65 | 1.17 | 8.40   | 0.0789 |
| 0.56 | 40.10 | 14.58 | 1.34 | 55.40  | 0.0883 |
| 0.66 | 45.57 | 20.52 | 1.33 | 47.52  | 0.0826 |
| 0.62 | 43.91 | 17.03 | 1.39 | 17.82  | 0.0884 |
| 0.66 | 45.80 | 17.52 | 1.45 | 69.96  | 0.0913 |
| 0.46 | 32.76 | 12.94 | 1.18 | 54.40  | 0.0776 |
| 0.46 | 32.71 | 14.09 | 1.13 | 17.16  | 0.0739 |
| 0.62 | 43.66 | 19.36 | 1.29 | 54.00  | 0.0800 |
| 0.60 | 42.93 | 18.88 | 1.28 | 31.20  | 0.0801 |
| 0.62 | 43.59 | 19.26 | 1.29 | 49.01  | 0.0811 |
| 0.61 | 43.33 | 18.89 | 1.29 | 48.96  | 0.0809 |
| 0.46 | 32.15 | 11.48 | 1.24 | 11.69  | 0.0840 |
| 0.60 | 42.44 | 16.07 | 1.36 | 45.24  | 0.0879 |
| 0.55 | 39.81 | 15.95 | 1.27 | 27.82  | 0.0813 |
| 0.61 | 43.42 | 15.47 | 1.43 | 44.07  | 0.0916 |
| 0.53 | 38.44 | 14.79 | 1.27 | 33.60  | 0.0823 |
| 0.64 | 44.60 | 17.99 | 1.38 | 60.90  | 0.0871 |
| 0.53 | 38.56 | 15.42 | 1.25 | 28.20  | 0.0809 |
| 0.51 | 36.86 | 14.47 | 1.23 | 43.24  | 0.0797 |
| 0.60 | 42.74 | 16.47 | 1.36 | 86.70  | 0.0865 |
| 0.58 | 41.48 | 18.04 | 1.25 | 24.96  | 0.0792 |
| 0.59 | 42.21 | 16.53 | 1.34 | 49.30  | 0.0855 |
| 0.60 | 42.74 | 19.13 | 1.26 | 116.87 | 0.0788 |
| 0.51 | 37.05 | 13.88 | 1.26 | 13.32  | 0.0833 |
| 0.60 | 42.44 | 16.07 | 1.36 | 63.51  | 0.0879 |
| 0.65 | 45.09 | 20.27 | 1.32 | 27.60  | 0.0827 |
| 0.53 | 38.00 | 14.24 | 1.28 | 38.28  | 0.0836 |
| 0.64 | 44.82 | 18.04 | 1.39 | 50.75  | 0.0876 |
| 0.56 | 40.44 | 12.39 | 1.47 | 21.16  | 0.0989 |
| 0.45 | 31.82 | 12.34 | 1.18 | 9.00   | 0.0794 |

|      |       |       |      |        |        |
|------|-------|-------|------|--------|--------|
| 0.55 | 39.66 | 14.81 | 1.31 | 21.36  | 0.0854 |
| 0.53 | 38.20 | 15.31 | 1.24 | 42.24  | 0.0798 |
| 0.67 | 46.30 | 17.19 | 1.49 | 73.53  | 0.0945 |
| 0.54 | 38.82 | 14.07 | 1.32 | 47.52  | 0.0855 |
| 0.66 | 45.47 | 21.98 | 1.28 | 74.00  | 0.0785 |
| 0.59 | 42.38 | 17.49 | 1.30 | 104.40 | 0.0818 |
| 0.62 | 43.50 | 16.76 | 1.38 | 63.30  | 0.0885 |
| 0.58 | 41.68 | 15.10 | 1.38 | 39.90  | 0.0890 |
| 0.49 | 35.31 | 12.56 | 1.27 | 20.30  | 0.0853 |
| 0.56 | 40.19 | 17.93 | 1.21 | 36.12  | 0.0758 |
| 0.42 | 28.38 | 10.67 | 1.18 | 6.10   | 0.0810 |
| 0.61 | 43.19 | 19.28 | 1.27 | 37.82  | 0.0796 |
| 0.56 | 40.00 | 16.19 | 1.27 | 35.10  | 0.0808 |
| 0.53 | 38.08 | 16.07 | 1.21 | 47.50  | 0.0778 |
| 0.56 | 40.29 | 16.00 | 1.28 | 26.52  | 0.0824 |
| 0.51 | 36.51 | 12.32 | 1.32 | 62.00  | 0.0884 |
| 0.62 | 43.67 | 18.25 | 1.33 | 89.32  | 0.0845 |
| 0.65 | 45.17 | 18.82 | 1.37 | 41.80  | 0.0859 |
| 0.60 | 42.45 | 19.23 | 1.25 | 36.40  | 0.0771 |
| 0.67 | 46.20 | 17.99 | 1.45 | 58.40  | 0.0918 |
| 0.59 | 42.32 | 16.82 | 1.33 | 26.68  | 0.0849 |
| 0.41 | 27.75 | 12.24 | 1.09 | 3.90   | 0.0728 |
| 0.54 | 38.76 | 15.76 | 1.24 | 75.11  | 0.0788 |
| 0.51 | 37.11 | 15.12 | 1.21 | 9.94   | 0.0795 |
| 0.50 | 36.00 | 12.21 | 1.31 | 12.58  | 0.0882 |
| 0.55 | 39.59 | 17.11 | 1.22 | 23.80  | 0.0780 |
| 0.56 | 40.10 | 15.42 | 1.30 | 78.75  | 0.0841 |
| 0.55 | 39.90 | 18.51 | 1.18 | 67.92  | 0.0742 |
| 0.67 | 46.00 | 20.59 | 1.35 | 162.96 | 0.0829 |
| 0.57 | 40.72 | 15.50 | 1.32 | 48.05  | 0.0846 |
| 0.54 | 38.71 | 14.49 | 1.29 | 38.88  | 0.0836 |
| 0.54 | 39.22 | 14.40 | 1.31 | 49.59  | 0.0849 |
| 0.57 | 40.78 | 17.41 | 1.25 | 20.40  | 0.0780 |
| 0.63 | 44.00 | 16.74 | 1.40 | 27.52  | 0.0899 |
| 0.56 | 40.05 | 15.10 | 1.31 | 23.66  | 0.0850 |
| 0.62 | 43.69 | 15.74 | 1.43 | 89.76  | 0.0924 |
| 0.65 | 45.17 | 17.00 | 1.44 | 118.56 | 0.0919 |
| 0.53 | 38.50 | 15.44 | 1.25 | 9.24   | 0.0818 |
| 0.55 | 39.56 | 14.28 | 1.33 | 116.80 | 0.0859 |
| 0.54 | 39.08 | 17.75 | 1.18 | 25.40  | 0.0749 |
| 0.66 | 45.48 | 19.25 | 1.37 | 66.69  | 0.0855 |
| 0.56 | 40.24 | 17.09 | 1.24 | 63.72  | 0.0786 |
| 0.58 | 41.35 | 15.96 | 1.33 | 22.68  | 0.0852 |
| 0.56 | 40.43 | 15.91 | 1.29 | 58.50  | 0.0825 |
| 0.56 | 40.49 | 15.97 | 1.29 | 42.78  | 0.0823 |
| 0.49 | 35.15 | 13.12 | 1.24 | 27.95  | 0.0827 |
| 0.56 | 40.24 | 18.51 | 1.19 | 44.55  | 0.0745 |
| 0.63 | 44.00 | 17.41 | 1.37 | 23.04  | 0.0875 |
| 0.61 | 43.08 | 15.21 | 1.43 | 34.58  | 0.0917 |
| 0.60 | 42.55 | 15.52 | 1.39 | 24.07  | 0.0903 |
| 0.71 | 47.69 | 21.00 | 1.41 | 63.55  | 0.0893 |

|      |       |       |      |        |        |
|------|-------|-------|------|--------|--------|
| 0.39 | 24.10 | 11.84 | 1.03 | 0.00   | 0.0693 |
| 0.48 | 34.68 | 13.44 | 1.21 | 30.42  | 0.0794 |
| 0.57 | 40.71 | 16.00 | 1.30 | 57.24  | 0.0834 |
| 0.47 | 33.78 | 14.24 | 1.15 | 15.68  | 0.0752 |
| 0.54 | 38.96 | 14.22 | 1.31 | 23.92  | 0.0860 |
| 0.51 | 37.07 | 12.85 | 1.31 | 70.72  | 0.0879 |
| 0.57 | 41.12 | 17.39 | 1.26 | 50.68  | 0.0798 |
| 0.61 | 43.05 | 16.07 | 1.39 | 27.60  | 0.0896 |
| 0.57 | 40.65 | 14.24 | 1.38 | 35.84  | 0.0898 |
| 0.49 | 35.39 | 13.67 | 1.22 | 12.00  | 0.0820 |
| 0.57 | 41.00 | 13.22 | 1.44 | 41.08  | 0.0958 |
| 0.58 | 41.65 | 16.73 | 1.31 | 45.22  | 0.0825 |
| 0.53 | 38.44 | 16.15 | 1.22 | 59.04  | 0.0775 |
| 0.59 | 42.36 | 16.04 | 1.36 | 51.60  | 0.0876 |
| 0.59 | 42.22 | 16.80 | 1.33 | 54.72  | 0.0842 |
| 0.50 | 36.27 | 15.42 | 1.18 | 25.67  | 0.0760 |
| 0.54 | 38.93 | 16.52 | 1.22 | 14.88  | 0.0776 |
| 0.52 | 37.69 | 17.89 | 1.13 | 31.20  | 0.0725 |
| 0.41 | 27.67 | 13.12 | 1.05 | 3.96   | 0.0699 |
| 0.58 | 41.75 | 18.74 | 1.24 | 22.62  | 0.0774 |
| 0.60 | 42.81 | 14.22 | 1.47 | 47.52  | 0.0953 |
| 0.52 | 37.73 | 13.70 | 1.30 | 28.29  | 0.0849 |
| 0.59 | 41.91 | 19.56 | 1.22 | 32.70  | 0.0755 |
| 0.46 | 32.06 | 13.55 | 1.13 | 8.08   | 0.0753 |
| 0.44 | 30.56 | 11.66 | 1.18 | 8.30   | 0.0796 |
| 0.54 | 39.10 | 16.38 | 1.23 | 25.48  | 0.0781 |
| 0.62 | 43.78 | 19.52 | 1.29 | 53.44  | 0.0805 |
| 0.47 | 33.10 | 11.41 | 1.27 | 35.55  | 0.0854 |
| 0.58 | 41.78 | 14.79 | 1.39 | 55.68  | 0.0903 |
| 0.63 | 44.26 | 18.64 | 1.34 | 31.96  | 0.0842 |
| 0.53 | 38.53 | 14.07 | 1.31 | 17.22  | 0.0858 |
| 0.56 | 40.53 | 15.51 | 1.31 | 72.80  | 0.0845 |
| 0.54 | 38.86 | 14.49 | 1.30 | 35.62  | 0.0841 |
| 0.56 | 40.60 | 14.79 | 1.35 | 53.07  | 0.0873 |
| 0.61 | 43.33 | 16.06 | 1.40 | 158.08 | 0.0902 |
| 0.47 | 33.47 | 11.63 | 1.26 | 15.47  | 0.0847 |
| 0.50 | 36.37 | 14.34 | 1.22 | 58.65  | 0.0790 |
| 0.54 | 39.29 | 16.59 | 1.23 | 55.35  | 0.0778 |
| 0.53 | 38.34 | 15.42 | 1.24 | 42.56  | 0.0806 |
| 0.52 | 37.84 | 13.12 | 1.33 | 21.24  | 0.0886 |
| 0.52 | 37.75 | 15.31 | 1.23 | 18.04  | 0.0790 |
| 0.68 | 46.57 | 22.65 | 1.31 | 51.84  | 0.0788 |
| 0.56 | 40.24 | 17.09 | 1.24 | 36.99  | 0.0786 |
| 0.51 | 36.78 | 14.81 | 1.22 | 34.39  | 0.0789 |
| 0.61 | 43.01 | 19.63 | 1.26 | 31.32  | 0.0784 |
| 0.53 | 38.25 | 17.43 | 1.16 | 33.00  | 0.0736 |
| 0.58 | 41.52 | 13.93 | 1.43 | 52.78  | 0.0937 |
| 0.51 | 37.00 | 14.36 | 1.24 | 38.72  | 0.0806 |
| 0.52 | 37.32 | 13.54 | 1.29 | 49.68  | 0.0854 |
| 0.54 | 38.82 | 13.45 | 1.35 | 42.00  | 0.0894 |
| 0.62 | 43.73 | 17.46 | 1.36 | 40.50  | 0.0868 |

|      |       |       |      |        |        |
|------|-------|-------|------|--------|--------|
| 0.55 | 39.33 | 15.06 | 1.29 | 34.32  | 0.0832 |
| 0.54 | 39.29 | 16.40 | 1.23 | 26.46  | 0.0793 |
| 0.66 | 45.47 | 20.04 | 1.34 | 48.10  | 0.0835 |
| 0.61 | 43.05 | 17.06 | 1.35 | 74.40  | 0.0861 |
| 0.58 | 41.56 | 16.25 | 1.32 | 56.96  | 0.0841 |
| 0.59 | 42.35 | 15.05 | 1.41 | 39.96  | 0.0919 |
| 0.55 | 39.56 | 14.88 | 1.31 | 19.80  | 0.0865 |
| 0.47 | 33.57 | 12.02 | 1.25 | 37.92  | 0.0834 |
| 0.61 | 43.42 | 17.22 | 1.36 | 53.63  | 0.0865 |
| 0.56 | 40.24 | 15.66 | 1.30 | 29.70  | 0.0833 |
| 0.42 | 28.92 | 11.31 | 1.16 | 10.29  | 0.0786 |
| 0.48 | 34.13 | 13.18 | 1.21 | 132.60 | 0.0794 |
| 0.56 | 40.42 | 15.91 | 1.29 | 45.92  | 0.0828 |
| 0.61 | 43.42 | 19.35 | 1.28 | 32.55  | 0.0800 |
| 0.50 | 35.87 | 14.67 | 1.19 | 20.06  | 0.0777 |
| 0.63 | 44.22 | 20.11 | 1.29 | 63.04  | 0.0802 |
| 0.48 | 34.11 | 12.38 | 1.24 | 15.20  | 0.0829 |
| 0.56 | 40.55 | 16.86 | 1.26 | 87.90  | 0.0797 |
| 0.46 | 32.94 | 13.72 | 1.15 | 21.70  | 0.0753 |
| 0.53 | 38.16 | 14.58 | 1.27 | 29.60  | 0.0837 |
| 0.49 | 35.43 | 15.37 | 1.15 | 14.16  | 0.0752 |
| 0.53 | 38.05 | 13.60 | 1.31 | 33.20  | 0.0866 |
| 0.47 | 33.50 | 14.38 | 1.14 | 49.84  | 0.0741 |
| 0.60 | 42.67 | 16.03 | 1.37 | 35.88  | 0.0892 |
| 0.58 | 41.54 | 17.61 | 1.27 | 61.50  | 0.0808 |
| 0.57 | 40.65 | 13.95 | 1.39 | 301.56 | 0.0910 |
| 0.59 | 41.96 | 16.26 | 1.34 | 60.12  | 0.0846 |
| 0.49 | 35.19 | 14.67 | 1.17 | 65.44  | 0.0764 |
| 0.62 | 43.96 | 21.16 | 1.24 | 120.05 | 0.0763 |
| 0.44 | 30.78 | 11.46 | 1.20 | 12.87  | 0.0808 |
| 0.57 | 41.17 | 16.38 | 1.30 | 52.39  | 0.0828 |
| 0.49 | 35.21 | 12.76 | 1.26 | 14.58  | 0.0835 |
| 0.64 | 44.57 | 16.70 | 1.43 | 62.00  | 0.0906 |
| 0.57 | 40.65 | 15.95 | 1.30 | 61.60  | 0.0833 |
| 0.56 | 40.23 | 14.92 | 1.33 | 59.80  | 0.0873 |
| 0.48 | 34.06 | 13.94 | 1.17 | 15.40  | 0.0769 |
| 0.48 | 34.67 | 12.89 | 1.24 | 15.98  | 0.0818 |
| 0.72 | 48.04 | 21.00 | 1.43 | 61.65  | 0.0884 |
| 0.53 | 38.47 | 14.81 | 1.27 | 30.13  | 0.0824 |
| 0.61 | 43.35 | 19.29 | 1.28 | 31.50  | 0.0810 |
| 0.57 | 40.82 | 16.55 | 1.28 | 40.00  | 0.0822 |
| 0.49 | 35.46 | 13.33 | 1.24 | 13.44  | 0.0820 |
| 0.59 | 42.07 | 17.14 | 1.31 | 171.43 | 0.0828 |
| 0.49 | 34.97 | 14.40 | 1.18 | 13.40  | 0.0761 |
| 0.46 | 32.29 | 15.08 | 1.08 | 5.04   | 0.0698 |
| 0.55 | 39.49 | 16.54 | 1.24 | 82.32  | 0.0783 |
| 0.59 | 41.98 | 17.89 | 1.27 | 56.26  | 0.0805 |
| 0.59 | 42.14 | 18.14 | 1.27 | 79.80  | 0.0800 |
| 0.59 | 41.98 | 17.12 | 1.30 | 66.99  | 0.0829 |
| 0.48 | 34.00 | 15.55 | 1.11 | 16.44  | 0.0717 |
| 0.52 | 37.65 | 14.18 | 1.27 | 28.35  | 0.0821 |

|      |       |       |      |        |        |
|------|-------|-------|------|--------|--------|
| 0.58 | 41.58 | 16.26 | 1.32 | 65.80  | 0.0848 |
| 0.56 | 40.10 | 18.22 | 1.20 | 58.60  | 0.0761 |
| 0.40 | 26.16 | 11.62 | 1.08 | 2.73   | 0.0730 |
| 0.54 | 38.82 | 15.42 | 1.26 | 25.60  | 0.0816 |
| 0.51 | 37.04 | 13.60 | 1.28 | 22.80  | 0.0842 |
| 0.61 | 42.96 | 18.22 | 1.30 | 65.62  | 0.0815 |
| 0.58 | 41.58 | 18.51 | 1.24 | 20.72  | 0.0778 |
| 0.54 | 38.86 | 14.75 | 1.29 | 25.22  | 0.0831 |
| 0.44 | 30.93 | 12.20 | 1.17 | 9.99   | 0.0782 |
| 0.55 | 39.90 | 17.89 | 1.20 | 37.68  | 0.0759 |
| 0.46 | 32.99 | 13.70 | 1.15 | 18.00  | 0.0753 |
| 0.59 | 42.36 | 15.27 | 1.40 | 54.60  | 0.0905 |
| 0.44 | 30.29 | 13.40 | 1.10 | 3.00   | 0.0730 |
| 0.51 | 37.05 | 12.65 | 1.32 | 22.14  | 0.0886 |
| 0.49 | 35.19 | 14.52 | 1.18 | 56.00  | 0.0769 |
| 0.67 | 46.11 | 20.40 | 1.36 | 42.78  | 0.0855 |
| 0.63 | 44.13 | 13.45 | 1.57 | 30.36  | 0.1043 |
| 0.67 | 46.10 | 20.67 | 1.35 | 166.46 | 0.0832 |
| 0.46 | 32.06 | 13.45 | 1.14 | 6.88   | 0.0757 |
| 0.51 | 36.53 | 14.81 | 1.21 | 43.56  | 0.0785 |
| 0.59 | 42.19 | 18.86 | 1.25 | 42.90  | 0.0788 |
| 0.66 | 45.51 | 18.61 | 1.40 | 100.80 | 0.0867 |
| 0.55 | 39.72 | 17.12 | 1.22 | 18.60  | 0.0783 |
| 0.53 | 38.09 | 14.09 | 1.29 | 24.64  | 0.0834 |
| 0.56 | 40.47 | 18.59 | 1.20 | 26.73  | 0.0749 |
| 0.45 | 31.82 | 12.55 | 1.17 | 11.25  | 0.0785 |
| 0.59 | 42.22 | 16.52 | 1.34 | 53.76  | 0.0852 |
| 0.57 | 41.18 | 17.27 | 1.27 | 40.50  | 0.0805 |
| 0.55 | 39.88 | 15.68 | 1.28 | 36.74  | 0.0831 |
| 0.53 | 38.05 | 14.67 | 1.26 | 369.25 | 0.0815 |
| 0.57 | 40.65 | 14.52 | 1.36 | 59.36  | 0.0887 |
| 0.51 | 36.90 | 13.36 | 1.28 | 25.20  | 0.0847 |
| 0.64 | 44.51 | 16.35 | 1.44 | 129.60 | 0.0924 |
| 0.57 | 40.77 | 13.70 | 1.41 | 32.40  | 0.0922 |
| 0.55 | 39.66 | 16.63 | 1.24 | 45.36  | 0.0791 |
| 0.53 | 38.28 | 15.72 | 1.23 | 40.95  | 0.0791 |
| 0.55 | 39.81 | 14.24 | 1.34 | 26.26  | 0.0877 |
| 0.64 | 44.69 | 21.48 | 1.26 | 85.28  | 0.0768 |
| 0.70 | 47.55 | 22.45 | 1.36 | 59.28  | 0.0837 |
| 0.58 | 41.56 | 16.11 | 1.33 | 41.28  | 0.0846 |
| 0.58 | 41.54 | 18.47 | 1.24 | 35.25  | 0.0783 |
| 0.54 | 38.79 | 15.14 | 1.27 | 21.28  | 0.0812 |
| 0.55 | 39.95 | 14.64 | 1.33 | 49.00  | 0.0862 |
| 0.54 | 38.67 | 14.58 | 1.29 | 23.97  | 0.0849 |
| 0.54 | 38.67 | 14.58 | 1.29 | 13.09  | 0.0849 |
| 0.58 | 41.37 | 13.20 | 1.46 | 56.16  | 0.0975 |
| 0.62 | 43.91 | 18.60 | 1.33 | 33.33  | 0.0834 |
| 0.48 | 33.97 | 11.81 | 1.27 | 6.82   | 0.0863 |
| 0.32 | 13.50 | 8.30  | 1.02 | -5.90  | 0.0730 |
| 0.59 | 42.21 | 17.63 | 1.29 | 37.12  | 0.0819 |
| 0.60 | 42.82 | 16.05 | 1.38 | 32.94  | 0.0895 |

|      |       |       |      |        |        |
|------|-------|-------|------|--------|--------|
| 0.54 | 38.65 | 15.31 | 1.26 | 38.50  | 0.0807 |
| 0.54 | 38.62 | 13.20 | 1.35 | 49.40  | 0.0888 |
| 0.53 | 38.14 | 13.68 | 1.31 | 24.70  | 0.0855 |
| 0.61 | 43.24 | 18.32 | 1.31 | 65.25  | 0.0828 |
| 0.54 | 38.63 | 16.46 | 1.21 | 68.86  | 0.0773 |
| 0.55 | 39.81 | 13.95 | 1.36 | 51.74  | 0.0889 |
| 0.56 | 40.05 | 17.72 | 1.21 | 44.20  | 0.0764 |
| 0.41 | 27.34 | 9.47  | 1.23 | 12.42  | 0.0847 |
| 0.48 | 34.53 | 16.94 | 1.07 | 15.30  | 0.0690 |
| 0.50 | 36.28 | 14.36 | 1.22 | 18.06  | 0.0803 |
| 0.57 | 40.72 | 16.28 | 1.29 | 68.20  | 0.0819 |
| 0.51 | 36.53 | 15.41 | 1.18 | 37.26  | 0.0765 |
| 0.55 | 39.81 | 16.94 | 1.23 | 93.60  | 0.0781 |
| 0.48 | 34.31 | 15.27 | 1.13 | 10.40  | 0.0730 |
| 0.49 | 35.46 | 12.15 | 1.30 | 14.24  | 0.0873 |
| 0.57 | 40.72 | 13.95 | 1.39 | 61.38  | 0.0907 |
| 0.52 | 37.69 | 14.43 | 1.26 | 89.75  | 0.0815 |
| 0.49 | 34.89 | 12.98 | 1.24 | 34.96  | 0.0809 |
| 0.48 | 34.42 | 14.07 | 1.18 | 12.60  | 0.0765 |
| 0.72 | 48.11 | 23.07 | 1.37 | 92.82  | 0.0825 |
| 0.45 | 31.71 | 10.20 | 1.30 | 21.36  | 0.0892 |
| 0.54 | 39.26 | 14.70 | 1.30 | 44.80  | 0.0840 |
| 0.49 | 34.89 | 13.57 | 1.21 | 19.74  | 0.0801 |
| 0.55 | 39.33 | 13.28 | 1.37 | 85.80  | 0.0905 |
| 0.51 | 36.50 | 14.70 | 1.21 | 28.38  | 0.0782 |
| 0.43 | 29.55 | 12.73 | 1.11 | 4.80   | 0.0743 |
| 0.63 | 44.24 | 22.96 | 1.21 | 40.77  | 0.0741 |
| 0.62 | 43.79 | 16.75 | 1.39 | 59.20  | 0.0884 |
| 0.55 | 39.76 | 16.15 | 1.26 | 26.46  | 0.0804 |
| 0.58 | 41.78 | 17.29 | 1.29 | 21.75  | 0.0825 |
| 0.51 | 36.51 | 12.59 | 1.31 | 14.40  | 0.0871 |
| 0.58 | 41.75 | 16.32 | 1.33 | 62.06  | 0.0849 |
| 0.47 | 33.60 | 12.69 | 1.21 | 49.98  | 0.0803 |
| 0.56 | 40.52 | 15.36 | 1.32 | 24.50  | 0.0839 |
| 0.60 | 42.67 | 17.33 | 1.32 | 50.56  | 0.0837 |
| 0.57 | 41.18 | 17.58 | 1.26 | 32.13  | 0.0796 |
| 0.62 | 43.59 | 13.56 | 1.54 | 75.11  | 0.1025 |
| 0.58 | 41.80 | 18.95 | 1.23 | 34.80  | 0.0768 |
| 0.46 | 32.16 | 11.82 | 1.22 | 19.65  | 0.0813 |
| 0.48 | 34.33 | 13.93 | 1.18 | 12.60  | 0.0775 |
| 0.73 | 48.63 | 22.76 | 1.41 | 38.85  | 0.0871 |
| 0.55 | 39.61 | 15.39 | 1.29 | 37.50  | 0.0829 |
| 0.53 | 37.99 | 15.36 | 1.23 | 28.58  | 0.0793 |
| 0.76 | 49.59 | 21.86 | 1.49 | 106.20 | 0.0920 |
| 0.60 | 42.44 | 16.39 | 1.35 | 43.50  | 0.0867 |
| 0.59 | 41.84 | 16.80 | 1.31 | 59.83  | 0.0832 |
| 0.49 | 35.20 | 13.68 | 1.22 | 35.70  | 0.0798 |
| 0.44 | 30.15 | 11.94 | 1.16 | 12.04  | 0.0781 |
| 0.57 | 40.77 | 15.58 | 1.32 | 83.10  | 0.0846 |
| 0.41 | 27.64 | 11.84 | 1.10 | 2.67   | 0.0746 |
| 0.65 | 45.23 | 17.46 | 1.43 | 135.24 | 0.0893 |

|      |       |       |      |        |        |
|------|-------|-------|------|--------|--------|
| 0.47 | 33.22 | 13.14 | 1.18 | 17.50  | 0.0781 |
| 0.64 | 44.93 | 18.55 | 1.37 | 105.75 | 0.0849 |
| 0.53 | 38.05 | 16.97 | 1.17 | 24.60  | 0.0748 |
| 0.66 | 45.70 | 17.78 | 1.44 | 40.18  | 0.0906 |
| 0.57 | 40.72 | 16.41 | 1.28 | 30.38  | 0.0814 |
| 0.57 | 41.12 | 16.00 | 1.31 | 95.20  | 0.0844 |
| 0.59 | 42.02 | 14.32 | 1.43 | 50.75  | 0.0925 |
| 0.56 | 40.55 | 15.01 | 1.34 | 38.70  | 0.0861 |
| 0.55 | 39.63 | 15.91 | 1.26 | 14.96  | 0.0817 |
| 0.57 | 41.00 | 17.00 | 1.27 | 67.34  | 0.0811 |
| 0.52 | 37.25 | 16.11 | 1.18 | 37.18  | 0.0752 |
| 0.55 | 39.81 | 15.95 | 1.27 | 35.36  | 0.0813 |
| 0.59 | 42.35 | 17.10 | 1.32 | 55.08  | 0.0844 |
| 0.42 | 28.19 | 10.61 | 1.18 | 4.98   | 0.0807 |
| 0.74 | 48.86 | 21.64 | 1.45 | 57.24  | 0.0885 |
| 0.64 | 44.84 | 18.20 | 1.38 | 61.05  | 0.0869 |
| 0.60 | 42.89 | 15.87 | 1.39 | 24.00  | 0.0895 |
| 0.55 | 39.57 | 15.64 | 1.27 | 23.40  | 0.0818 |
| 0.68 | 46.48 | 19.35 | 1.41 | 71.76  | 0.0875 |
| 0.67 | 46.30 | 17.79 | 1.47 | 126.28 | 0.0927 |
| 0.59 | 41.81 | 16.06 | 1.34 | 90.44  | 0.0862 |
| 0.64 | 44.82 | 18.70 | 1.36 | 45.50  | 0.0856 |
| 0.63 | 44.05 | 18.99 | 1.32 | 43.21  | 0.0832 |
| 0.49 | 34.90 | 12.44 | 1.27 | 16.95  | 0.0847 |
| 0.66 | 45.80 | 17.34 | 1.46 | 65.20  | 0.0926 |
| 0.50 | 35.74 | 14.80 | 1.18 | 27.36  | 0.0768 |
| 0.52 | 37.51 | 14.89 | 1.24 | 12.60  | 0.0811 |
| 0.50 | 35.74 | 14.63 | 1.19 | 22.00  | 0.0771 |
| 0.48 | 33.91 | 11.24 | 1.30 | 12.51  | 0.0895 |
| 0.53 | 38.11 | 13.40 | 1.32 | 21.96  | 0.0881 |
| 0.59 | 41.93 | 16.65 | 1.32 | 133.98 | 0.0837 |
| 0.61 | 42.96 | 16.80 | 1.35 | 87.38  | 0.0860 |
| 0.54 | 38.68 | 13.68 | 1.33 | 41.04  | 0.0873 |
| 0.55 | 39.41 | 14.81 | 1.30 | 44.88  | 0.0847 |
| 0.54 | 39.10 | 14.77 | 1.29 | 37.96  | 0.0837 |
| 0.52 | 37.73 | 13.94 | 1.28 | 54.05  | 0.0839 |
| 0.53 | 38.28 | 17.38 | 1.17 | 24.36  | 0.0739 |
| 0.53 | 38.50 | 15.85 | 1.23 | 22.22  | 0.0790 |
| 0.48 | 34.12 | 14.25 | 1.16 | 20.13  | 0.0764 |
| 0.49 | 35.47 | 14.52 | 1.19 | 15.30  | 0.0773 |
| 0.56 | 40.29 | 14.81 | 1.33 | 31.98  | 0.0868 |
| 0.56 | 40.05 | 13.65 | 1.38 | 30.68  | 0.0909 |
| 0.49 | 35.13 | 14.70 | 1.17 | 8.14   | 0.0770 |
| 0.56 | 40.35 | 15.47 | 1.31 | 76.68  | 0.0843 |
| 0.50 | 35.73 | 14.17 | 1.21 | 13.80  | 0.0796 |
| 0.48 | 34.40 | 13.57 | 1.20 | 23.63  | 0.0785 |
| 0.52 | 37.73 | 12.89 | 1.34 | 27.37  | 0.0884 |
| 0.61 | 43.07 | 15.85 | 1.40 | 22.56  | 0.0916 |
| 0.53 | 38.35 | 15.72 | 1.23 | 38.07  | 0.0783 |
| 0.54 | 38.62 | 14.47 | 1.29 | 54.34  | 0.0836 |
| 0.51 | 36.75 | 15.76 | 1.18 | 23.10  | 0.0752 |

|      |       |       |      |        |        |
|------|-------|-------|------|--------|--------|
| 0.56 | 40.29 | 15.94 | 1.29 | 48.62  | 0.0826 |
| 0.47 | 33.46 | 11.91 | 1.25 | 20.54  | 0.0842 |
| 0.59 | 42.22 | 17.37 | 1.30 | 77.12  | 0.0823 |
| 0.53 | 38.53 | 12.96 | 1.36 | 26.04  | 0.0907 |
| 0.47 | 33.16 | 13.13 | 1.18 | 9.54   | 0.0790 |
| 0.54 | 38.72 | 15.28 | 1.26 | 23.23  | 0.0813 |
| 0.53 | 38.00 | 14.81 | 1.25 | 41.58  | 0.0814 |
| 0.52 | 37.18 | 15.74 | 1.19 | 28.08  | 0.0769 |
| 0.69 | 46.85 | 19.83 | 1.41 | 58.32  | 0.0889 |
| 0.58 | 41.35 | 16.48 | 1.30 | 48.44  | 0.0834 |
| 0.65 | 45.26 | 20.24 | 1.33 | 97.68  | 0.0822 |
| 0.63 | 44.16 | 17.65 | 1.37 | 80.00  | 0.0861 |
| 0.61 | 43.45 | 16.47 | 1.39 | 44.64  | 0.0884 |
| 0.55 | 39.73 | 12.26 | 1.44 | 46.50  | 0.0969 |
| 0.42 | 28.70 | 10.88 | 1.18 | 6.30   | 0.0805 |
| 0.47 | 33.71 | 13.51 | 1.18 | 8.88   | 0.0781 |
| 0.63 | 44.40 | 18.47 | 1.35 | 128.88 | 0.0848 |
| 0.60 | 42.89 | 17.53 | 1.32 | 26.88  | 0.0838 |
| 0.54 | 38.67 | 17.13 | 1.19 | 20.74  | 0.0762 |
| 0.58 | 41.43 | 17.86 | 1.26 | 28.98  | 0.0801 |
| 0.53 | 38.31 | 15.74 | 1.23 | 26.00  | 0.0792 |
| 0.59 | 42.05 | 16.39 | 1.33 | 34.72  | 0.0857 |
| 0.56 | 40.42 | 17.87 | 1.22 | 56.28  | 0.0766 |
| 0.54 | 38.86 | 17.78 | 1.17 | 21.09  | 0.0745 |
| 0.50 | 36.00 | 14.46 | 1.21 | 37.35  | 0.0791 |
| 0.59 | 42.09 | 18.04 | 1.27 | 28.42  | 0.0804 |
| 0.59 | 42.32 | 16.54 | 1.34 | 45.82  | 0.0858 |
| 0.53 | 38.17 | 16.15 | 1.21 | 31.75  | 0.0767 |
| 0.59 | 41.96 | 15.01 | 1.39 | 52.20  | 0.0893 |
| 0.54 | 38.89 | 15.06 | 1.27 | 28.25  | 0.0822 |
| 0.58 | 41.53 | 15.29 | 1.36 | 36.36  | 0.0869 |
| 0.75 | 49.20 | 18.70 | 1.58 | 99.96  | 0.1009 |
| 0.63 | 44.37 | 17.59 | 1.38 | 37.60  | 0.0869 |
| 0.57 | 41.00 | 17.80 | 1.24 | 82.50  | 0.0780 |
| 0.58 | 41.48 | 17.71 | 1.26 | 98.54  | 0.0801 |
| 0.63 | 44.30 | 17.84 | 1.37 | 72.00  | 0.0865 |
| 0.48 | 34.68 | 12.79 | 1.24 | 18.18  | 0.0821 |
| 0.52 | 37.77 | 13.07 | 1.33 | 116.13 | 0.0880 |
| 0.51 | 37.03 | 13.07 | 1.30 | 23.20  | 0.0862 |
| 0.50 | 36.00 | 11.26 | 1.37 | 12.41  | 0.0930 |
| 0.58 | 41.45 | 17.09 | 1.28 | 33.90  | 0.0814 |
| 0.57 | 41.11 | 17.57 | 1.25 | 146.88 | 0.0787 |
| 0.53 | 38.18 | 15.80 | 1.22 | 54.40  | 0.0787 |
| 0.58 | 41.49 | 18.35 | 1.24 | 42.24  | 0.0773 |
| 0.56 | 40.29 | 17.48 | 1.23 | 26.78  | 0.0777 |
| 0.60 | 42.88 | 17.25 | 1.33 | 54.95  | 0.0842 |
| 0.67 | 46.00 | 21.10 | 1.33 | 45.22  | 0.0822 |
| 0.55 | 39.95 | 16.07 | 1.27 | 46.46  | 0.0818 |
| 0.53 | 38.41 | 13.50 | 1.33 | 27.51  | 0.0879 |
| 0.66 | 45.57 | 20.97 | 1.32 | 40.60  | 0.0816 |
| 0.58 | 41.23 | 16.75 | 1.29 | 47.10  | 0.0818 |

|      |       |       |      |        |        |
|------|-------|-------|------|--------|--------|
| 0.51 | 36.51 | 14.24 | 1.23 | 21.80  | 0.0802 |
| 0.61 | 43.47 | 18.71 | 1.30 | 88.80  | 0.0811 |
| 0.56 | 40.00 | 15.83 | 1.28 | 12.42  | 0.0821 |
| 0.55 | 39.90 | 13.78 | 1.37 | 22.99  | 0.0912 |
| 0.72 | 48.34 | 27.31 | 1.27 | 81.00  | 0.0763 |
| 0.51 | 36.75 | 12.15 | 1.34 | 14.96  | 0.0894 |
| 0.66 | 45.57 | 20.04 | 1.35 | 68.00  | 0.0842 |
| 0.57 | 41.12 | 15.44 | 1.34 | 60.48  | 0.0864 |
| 0.49 | 35.48 | 14.22 | 1.20 | 31.92  | 0.0781 |
| 0.57 | 41.18 | 15.45 | 1.34 | 66.69  | 0.0867 |
| 0.52 | 37.22 | 14.21 | 1.25 | 20.80  | 0.0827 |
| 0.53 | 38.08 | 15.74 | 1.22 | 26.79  | 0.0788 |
| 0.59 | 42.36 | 16.97 | 1.32 | 41.70  | 0.0844 |
| 0.58 | 41.73 | 15.40 | 1.36 | 123.69 | 0.0879 |
| 0.47 | 33.40 | 12.47 | 1.22 | 17.48  | 0.0804 |
| 0.55 | 39.44 | 16.02 | 1.25 | 77.55  | 0.0805 |
| 0.58 | 41.75 | 17.08 | 1.30 | 42.05  | 0.0824 |
| 0.58 | 41.24 | 14.17 | 1.40 | 60.00  | 0.0926 |
| 0.53 | 37.93 | 15.21 | 1.24 | 77.50  | 0.0793 |
| 0.67 | 46.00 | 19.43 | 1.39 | 35.52  | 0.0877 |
| 0.60 | 42.74 | 17.59 | 1.32 | 77.18  | 0.0828 |
| 0.61 | 43.10 | 19.54 | 1.26 | 71.75  | 0.0780 |
| 0.63 | 44.21 | 18.55 | 1.34 | 77.33  | 0.0838 |
| 0.52 | 37.65 | 12.47 | 1.35 | 19.71  | 0.0894 |
| 0.62 | 43.63 | 16.28 | 1.40 | 191.49 | 0.0892 |
| 0.61 | 43.03 | 15.64 | 1.41 | 55.77  | 0.0906 |
| 0.47 | 33.14 | 9.78  | 1.37 | 9.12   | 0.0954 |
| 0.62 | 43.66 | 16.80 | 1.38 | 65.16  | 0.0879 |
| 0.50 | 35.72 | 15.25 | 1.17 | 21.14  | 0.0759 |
| 0.54 | 38.65 | 13.96 | 1.31 | 22.50  | 0.0859 |
| 0.59 | 41.93 | 15.33 | 1.38 | 21.45  | 0.0884 |
| 0.54 | 39.04 | 12.85 | 1.38 | 60.48  | 0.0926 |
| 0.75 | 49.20 | 22.86 | 1.43 | 49.14  | 0.0882 |
| 0.52 | 37.60 | 12.06 | 1.38 | 22.78  | 0.0932 |
| 0.56 | 40.05 | 14.81 | 1.33 | 32.50  | 0.0861 |
| 0.48 | 34.55 | 13.68 | 1.20 | 21.34  | 0.0795 |
| 0.51 | 36.53 | 14.22 | 1.23 | 15.84  | 0.0807 |
| 0.61 | 42.96 | 14.81 | 1.44 | 51.00  | 0.0936 |
| 0.57 | 40.88 | 17.41 | 1.25 | 22.56  | 0.0798 |
| 0.59 | 41.95 | 14.02 | 1.44 | 35.10  | 0.0952 |
| 0.57 | 41.00 | 16.89 | 1.28 | 32.64  | 0.0802 |
| 0.57 | 40.82 | 14.04 | 1.39 | 45.00  | 0.0917 |
| 0.68 | 46.40 | 20.98 | 1.35 | 71.40  | 0.0832 |
| 0.63 | 44.00 | 17.09 | 1.39 | 207.20 | 0.0879 |
| 0.60 | 42.81 | 18.01 | 1.30 | 43.56  | 0.0819 |
| 0.60 | 42.40 | 16.80 | 1.33 | 32.20  | 0.0853 |
| 0.57 | 40.83 | 15.91 | 1.31 | 58.58  | 0.0837 |
| 0.58 | 41.23 | 18.15 | 1.24 | 23.40  | 0.0776 |
| 0.49 | 35.17 | 12.18 | 1.29 | 18.20  | 0.0868 |
| 0.51 | 36.52 | 14.04 | 1.24 | 22.61  | 0.0812 |
| 0.69 | 47.13 | 21.32 | 1.38 | 90.87  | 0.0852 |

|      |       |       |      |        |        |
|------|-------|-------|------|--------|--------|
| 0.64 | 44.99 | 20.17 | 1.32 | 85.87  | 0.0825 |
| 0.59 | 41.96 | 19.29 | 1.23 | 81.72  | 0.0755 |
| 0.42 | 27.97 | 9.99  | 1.21 | 8.58   | 0.0821 |
| 0.54 | 39.00 | 13.57 | 1.35 | 25.96  | 0.0890 |
| 0.53 | 38.03 | 12.44 | 1.37 | 68.25  | 0.0917 |
| 0.53 | 38.40 | 18.91 | 1.12 | 14.28  | 0.0708 |
| 0.62 | 43.78 | 18.70 | 1.32 | 33.92  | 0.0828 |
| 0.51 | 37.13 | 14.46 | 1.24 | 100.23 | 0.0822 |
| 0.62 | 43.74 | 15.76 | 1.43 | 47.60  | 0.0922 |
| 0.62 | 43.53 | 15.97 | 1.41 | 71.75  | 0.0907 |
| 0.60 | 42.88 | 16.98 | 1.34 | 22.40  | 0.0851 |
| 0.52 | 37.25 | 16.52 | 1.17 | 28.82  | 0.0740 |
| 0.53 | 38.32 | 14.91 | 1.26 | 26.40  | 0.0815 |
| 0.62 | 43.84 | 17.12 | 1.38 | 43.29  | 0.0869 |
| 0.53 | 38.28 | 15.12 | 1.25 | 55.86  | 0.0812 |
| 0.59 | 42.35 | 17.37 | 1.31 | 32.40  | 0.0835 |
| 0.47 | 33.84 | 12.38 | 1.24 | 15.68  | 0.0823 |
| 0.58 | 41.29 | 15.10 | 1.36 | 43.50  | 0.0880 |
| 0.68 | 46.67 | 21.63 | 1.34 | 47.47  | 0.0817 |
| 0.44 | 30.63 | 11.39 | 1.20 | 13.95  | 0.0812 |
| 0.56 | 40.05 | 16.27 | 1.27 | 68.12  | 0.0809 |
| 0.62 | 43.66 | 16.36 | 1.40 | 45.57  | 0.0876 |
| 0.47 | 33.71 | 12.34 | 1.24 | 13.92  | 0.0830 |
| 0.63 | 44.22 | 18.12 | 1.36 | 118.08 | 0.0859 |
| 0.64 | 44.84 | 18.82 | 1.36 | 36.26  | 0.0850 |
| 0.51 | 37.11 | 15.31 | 1.21 | 22.54  | 0.0789 |
| 0.47 | 33.33 | 12.21 | 1.23 | 13.94  | 0.0818 |
| 0.55 | 39.53 | 16.38 | 1.24 | 54.27  | 0.0790 |
| 0.51 | 37.13 | 14.52 | 1.24 | 20.46  | 0.0803 |
| 0.60 | 42.48 | 18.61 | 1.27 | 92.73  | 0.0792 |
| 0.47 | 33.06 | 13.82 | 1.15 | 15.70  | 0.0760 |
| 0.58 | 41.49 | 15.50 | 1.35 | 100.98 | 0.0865 |
| 0.51 | 37.01 | 15.88 | 1.18 | 30.66  | 0.0755 |
| 0.63 | 44.30 | 18.44 | 1.35 | 77.04  | 0.0846 |
| 0.53 | 38.50 | 15.47 | 1.24 | 31.90  | 0.0803 |
| 0.44 | 30.46 | 15.73 | 1.02 | 7.07   | 0.0655 |
| 0.47 | 33.78 | 14.24 | 1.15 | 19.04  | 0.0752 |
| 0.51 | 36.90 | 14.10 | 1.25 | 36.80  | 0.0817 |
| 0.47 | 33.46 | 13.07 | 1.19 | 12.09  | 0.0791 |
| 0.56 | 40.32 | 14.73 | 1.34 | 74.70  | 0.0865 |
| 0.48 | 34.38 | 11.66 | 1.29 | 31.84  | 0.0869 |
| 0.51 | 36.53 | 15.11 | 1.20 | 28.98  | 0.0775 |
| 0.58 | 41.81 | 17.29 | 1.29 | 80.15  | 0.0810 |
| 0.43 | 29.85 | 11.26 | 1.18 | 8.68   | 0.0806 |
| 0.60 | 42.67 | 16.40 | 1.36 | 91.78  | 0.0879 |
| 0.62 | 43.87 | 19.34 | 1.30 | 194.04 | 0.0807 |
| 0.53 | 38.20 | 16.73 | 1.19 | 14.16  | 0.0752 |
| 0.49 | 35.22 | 16.28 | 1.12 | 14.44  | 0.0708 |
| 0.57 | 40.94 | 15.72 | 1.32 | 43.20  | 0.0851 |
| 0.60 | 42.44 | 17.67 | 1.30 | 59.74  | 0.0825 |
| 0.54 | 39.14 | 15.07 | 1.28 | 24.64  | 0.0824 |

|      |       |       |      |        |        |
|------|-------|-------|------|--------|--------|
| 0.44 | 30.39 | 12.17 | 1.15 | 5.12   | 0.0774 |
| 0.47 | 33.14 | 13.04 | 1.19 | 24.84  | 0.0787 |
| 0.55 | 39.66 | 14.81 | 1.31 | 26.64  | 0.0854 |
| 0.58 | 41.23 | 14.52 | 1.38 | 84.00  | 0.0900 |
| 0.56 | 40.42 | 16.75 | 1.26 | 27.16  | 0.0800 |
| 0.52 | 37.52 | 15.66 | 1.20 | 40.53  | 0.0774 |
| 0.48 | 34.38 | 12.81 | 1.23 | 19.68  | 0.0817 |
| 0.47 | 33.87 | 10.90 | 1.32 | 52.02  | 0.0895 |
| 0.53 | 38.28 | 15.12 | 1.25 | 45.36  | 0.0812 |
| 0.46 | 32.47 | 11.10 | 1.26 | 13.90  | 0.0865 |
| 0.62 | 43.62 | 16.70 | 1.39 | 14.56  | 0.0898 |
| 0.56 | 40.47 | 16.85 | 1.26 | 61.02  | 0.0800 |
| 0.47 | 33.43 | 13.60 | 1.17 | 31.68  | 0.0771 |
| 0.58 | 41.49 | 19.10 | 1.22 | 45.21  | 0.0753 |
| 0.52 | 37.56 | 12.96 | 1.33 | 24.51  | 0.0884 |
| 0.58 | 41.23 | 16.75 | 1.29 | 17.40  | 0.0818 |
| 0.58 | 41.78 | 14.49 | 1.41 | 23.50  | 0.0927 |
| 0.65 | 45.08 | 22.67 | 1.25 | 81.49  | 0.0769 |
| 0.57 | 40.89 | 13.31 | 1.43 | 36.48  | 0.0940 |
| 0.57 | 41.00 | 16.15 | 1.30 | 44.70  | 0.0832 |
| 0.59 | 41.82 | 17.88 | 1.27 | 40.53  | 0.0814 |
| 0.44 | 30.12 | 11.33 | 1.19 | 8.30   | 0.0803 |
| 0.62 | 43.95 | 15.70 | 1.45 | 75.30  | 0.0940 |
| 0.57 | 40.76 | 16.35 | 1.29 | 23.66  | 0.0825 |
| 0.68 | 46.61 | 19.59 | 1.41 | 32.00  | 0.0881 |
| 0.54 | 39.10 | 14.10 | 1.32 | 71.76  | 0.0863 |
| 0.61 | 43.11 | 17.77 | 1.32 | 78.08  | 0.0837 |
| 0.61 | 42.97 | 16.37 | 1.37 | 69.75  | 0.0881 |
| 0.64 | 44.63 | 19.05 | 1.34 | 102.86 | 0.0836 |
| 0.65 | 45.30 | 16.96 | 1.45 | 17.64  | 0.0943 |
| 0.61 | 43.47 | 15.58 | 1.43 | 54.12  | 0.0923 |
| 0.58 | 41.78 | 16.43 | 1.32 | 51.20  | 0.0842 |
| 0.51 | 36.81 | 14.27 | 1.24 | 12.16  | 0.0815 |
| 0.59 | 41.81 | 17.94 | 1.27 | 78.40  | 0.0800 |
| 0.58 | 41.33 | 15.28 | 1.35 | 69.44  | 0.0870 |
| 0.50 | 36.00 | 13.92 | 1.23 | 18.04  | 0.0799 |
| 0.58 | 41.56 | 15.04 | 1.37 | 63.36  | 0.0886 |
| 0.58 | 41.75 | 15.94 | 1.34 | 19.58  | 0.0875 |
| 0.44 | 30.49 | 10.85 | 1.22 | 12.87  | 0.0832 |
| 0.56 | 40.32 | 16.28 | 1.27 | 51.00  | 0.0809 |
| 0.59 | 42.28 | 15.65 | 1.38 | 26.88  | 0.0891 |
| 0.55 | 39.81 | 15.09 | 1.31 | 94.64  | 0.0844 |
| 0.49 | 35.47 | 13.67 | 1.22 | 28.22  | 0.0805 |
| 0.46 | 32.29 | 14.02 | 1.12 | 10.56  | 0.0733 |
| 0.52 | 37.56 | 14.50 | 1.25 | 22.42  | 0.0820 |
| 0.38 | 23.33 | 9.61  | 1.12 | 1.32   | 0.0779 |
| 0.60 | 42.67 | 17.78 | 1.31 | 28.48  | 0.0823 |
| 0.62 | 43.91 | 19.10 | 1.31 | 24.36  | 0.0827 |
| 0.64 | 44.89 | 18.22 | 1.38 | 37.44  | 0.0878 |
| 0.59 | 42.00 | 15.50 | 1.37 | 51.26  | 0.0899 |
| 0.57 | 41.00 | 18.59 | 1.22 | 37.62  | 0.0770 |

|      |       |       |      |        |        |
|------|-------|-------|------|--------|--------|
| 0.53 | 38.31 | 17.00 | 1.18 | 22.20  | 0.0753 |
| 0.44 | 30.93 | 10.54 | 1.25 | 8.91   | 0.0862 |
| 0.53 | 38.44 | 13.69 | 1.32 | 26.64  | 0.0866 |
| 0.57 | 40.83 | 17.87 | 1.23 | 75.69  | 0.0775 |
| 0.62 | 43.91 | 18.07 | 1.34 | 16.52  | 0.0858 |
| 0.54 | 39.29 | 15.67 | 1.26 | 56.70  | 0.0808 |
| 0.62 | 43.69 | 21.56 | 1.22 | 28.71  | 0.0749 |
| 0.63 | 44.17 | 18.35 | 1.35 | 49.35  | 0.0846 |
| 0.49 | 34.97 | 11.23 | 1.33 | 20.80  | 0.0899 |
| 0.57 | 40.62 | 17.25 | 1.25 | 65.67  | 0.0782 |
| 0.50 | 36.00 | 12.21 | 1.31 | 54.78  | 0.0872 |
| 0.52 | 37.86 | 15.42 | 1.23 | 40.60  | 0.0780 |
| 0.46 | 32.08 | 12.70 | 1.17 | 17.28  | 0.0771 |
| 0.61 | 43.08 | 17.19 | 1.34 | 78.28  | 0.0845 |
| 0.59 | 42.21 | 15.74 | 1.37 | 23.20  | 0.0884 |
| 0.54 | 38.96 | 17.19 | 1.20 | 71.99  | 0.0758 |
| 0.53 | 38.11 | 16.08 | 1.21 | 19.98  | 0.0780 |
| 0.53 | 38.12 | 14.38 | 1.28 | 31.32  | 0.0825 |
| 0.46 | 32.81 | 12.70 | 1.19 | 14.85  | 0.0796 |
| 0.69 | 46.95 | 21.31 | 1.37 | 40.70  | 0.0849 |
| 0.52 | 37.23 | 16.80 | 1.15 | 17.48  | 0.0730 |
| 0.56 | 40.32 | 15.50 | 1.31 | 101.10 | 0.0836 |
| 0.59 | 42.28 | 15.42 | 1.39 | 32.20  | 0.0900 |
| 0.57 | 40.70 | 17.81 | 1.23 | 85.75  | 0.0780 |
| 0.69 | 46.87 | 19.26 | 1.44 | 78.30  | 0.0893 |
| 0.57 | 40.72 | 14.99 | 1.34 | 35.65  | 0.0865 |
| 0.64 | 44.91 | 18.47 | 1.37 | 72.76  | 0.0868 |
| 0.71 | 47.76 | 19.26 | 1.48 | 62.92  | 0.0928 |
| 0.55 | 39.64 | 17.42 | 1.21 | 31.35  | 0.0774 |
| 0.57 | 40.88 | 16.74 | 1.28 | 22.80  | 0.0819 |
| 0.56 | 40.39 | 16.71 | 1.26 | 53.28  | 0.0807 |
| 0.55 | 39.81 | 15.38 | 1.29 | 33.28  | 0.0834 |
| 0.78 | 50.26 | 24.95 | 1.43 | 101.00 | 0.0861 |
| 0.63 | 44.22 | 17.95 | 1.36 | 58.56  | 0.0865 |
| 0.47 | 33.14 | 11.26 | 1.28 | 11.52  | 0.0868 |
| 0.61 | 43.00 | 17.71 | 1.32 | 76.80  | 0.0835 |
| 0.46 | 32.62 | 12.87 | 1.18 | 13.65  | 0.0781 |
| 0.55 | 39.49 | 15.25 | 1.29 | 33.60  | 0.0826 |
| 0.53 | 38.00 | 14.24 | 1.28 | 14.30  | 0.0836 |
| 0.52 | 37.84 | 17.06 | 1.16 | 41.76  | 0.0744 |
| 0.48 | 34.33 | 12.44 | 1.25 | 12.88  | 0.0835 |
| 0.42 | 28.06 | 11.62 | 1.12 | 5.55   | 0.0759 |
| 0.52 | 37.25 | 12.62 | 1.33 | 26.40  | 0.0885 |
| 0.61 | 43.13 | 16.76 | 1.36 | 51.91  | 0.0875 |
| 0.40 | 26.00 | 9.93  | 1.16 | 1.98   | 0.0809 |
| 0.49 | 34.95 | 14.22 | 1.19 | 12.06  | 0.0771 |
| 0.49 | 35.19 | 14.52 | 1.18 | 20.80  | 0.0769 |
| 0.59 | 41.81 | 18.57 | 1.25 | 56.00  | 0.0782 |
| 0.52 | 37.67 | 17.88 | 1.13 | 49.84  | 0.0723 |
| 0.59 | 41.88 | 17.06 | 1.30 | 42.93  | 0.0832 |
| 0.58 | 41.74 | 15.93 | 1.34 | 33.12  | 0.0852 |

|      |       |       |      |        |        |
|------|-------|-------|------|--------|--------|
| 0.52 | 37.82 | 15.39 | 1.22 | 17.29  | 0.0794 |
| 0.61 | 43.47 | 18.88 | 1.30 | 35.38  | 0.0818 |
| 0.67 | 46.20 | 19.71 | 1.39 | 57.19  | 0.0859 |
| 0.51 | 36.50 | 15.21 | 1.19 | 31.02  | 0.0764 |
| 0.48 | 34.57 | 12.14 | 1.27 | 8.16   | 0.0859 |
| 0.51 | 36.68 | 12.18 | 1.34 | 12.60  | 0.0905 |
| 0.62 | 43.53 | 16.27 | 1.40 | 39.90  | 0.0896 |
| 0.63 | 44.04 | 18.26 | 1.34 | 53.04  | 0.0846 |
| 0.57 | 40.65 | 17.37 | 1.25 | 17.64  | 0.0787 |
| 0.52 | 37.25 | 12.97 | 1.31 | 25.96  | 0.0869 |
| 0.56 | 40.34 | 15.73 | 1.30 | 35.50  | 0.0837 |
| 0.58 | 41.35 | 17.38 | 1.27 | 27.44  | 0.0805 |
| 0.46 | 32.18 | 13.60 | 1.14 | 19.60  | 0.0749 |
| 0.59 | 42.30 | 15.58 | 1.38 | 42.84  | 0.0885 |
| 0.51 | 36.90 | 14.49 | 1.23 | 21.00  | 0.0802 |
| 0.58 | 41.24 | 15.42 | 1.34 | 167.44 | 0.0872 |
| 0.53 | 38.09 | 15.24 | 1.24 | 72.24  | 0.0791 |
| 0.55 | 39.61 | 16.27 | 1.25 | 34.75  | 0.0799 |
| 0.53 | 38.59 | 15.23 | 1.26 | 36.45  | 0.0805 |
| 0.55 | 39.61 | 15.68 | 1.27 | 20.75  | 0.0819 |
| 0.52 | 37.50 | 15.06 | 1.23 | 37.18  | 0.0793 |
| 0.61 | 43.27 | 18.42 | 1.31 | 96.60  | 0.0825 |
| 0.53 | 37.98 | 12.59 | 1.36 | 80.73  | 0.0904 |
| 0.58 | 41.35 | 19.65 | 1.19 | 45.92  | 0.0742 |
| 0.55 | 39.85 | 13.56 | 1.38 | 22.80  | 0.0919 |
| 0.53 | 38.00 | 14.52 | 1.27 | 47.74  | 0.0825 |
| 0.50 | 36.00 | 14.81 | 1.19 | 22.95  | 0.0775 |
| 0.54 | 38.93 | 14.66 | 1.29 | 23.76  | 0.0840 |
| 0.54 | 39.25 | 18.57 | 1.16 | 13.42  | 0.0728 |
| 0.57 | 40.71 | 15.70 | 1.31 | 100.71 | 0.0844 |
| 0.59 | 42.11 | 20.30 | 1.20 | 43.84  | 0.0739 |
| 0.54 | 39.22 | 15.63 | 1.26 | 38.28  | 0.0804 |
| 0.57 | 40.67 | 13.68 | 1.40 | 27.20  | 0.0916 |
| 0.59 | 42.04 | 16.44 | 1.33 | 398.62 | 0.0840 |
| 0.55 | 39.95 | 15.84 | 1.28 | 19.32  | 0.0818 |
| 0.57 | 41.05 | 15.96 | 1.31 | 30.71  | 0.0830 |
| 0.50 | 36.25 | 12.46 | 1.31 | 182.85 | 0.0865 |
| 0.41 | 26.95 | 10.11 | 1.18 | 5.15   | 0.0811 |
| 0.58 | 41.44 | 18.32 | 1.24 | 96.00  | 0.0774 |
| 0.54 | 38.67 | 17.13 | 1.19 | 23.80  | 0.0762 |
| 0.55 | 39.53 | 14.77 | 1.31 | 42.12  | 0.0847 |
| 0.48 | 34.33 | 14.07 | 1.17 | 30.80  | 0.0770 |
| 0.57 | 41.00 | 15.81 | 1.32 | 94.18  | 0.0838 |
| 0.45 | 31.36 | 13.96 | 1.10 | 8.25   | 0.0719 |
| 0.56 | 40.00 | 15.64 | 1.29 | 46.44  | 0.0828 |
| 0.52 | 37.90 | 14.37 | 1.27 | 49.14  | 0.0830 |
| 0.59 | 42.11 | 13.18 | 1.49 | 25.90  | 0.0977 |
| 0.54 | 39.13 | 17.14 | 1.20 | 41.14  | 0.0765 |
| 0.50 | 36.00 | 14.22 | 1.22 | 53.60  | 0.0791 |
| 0.61 | 43.29 | 16.93 | 1.36 | 66.88  | 0.0860 |
| 0.55 | 39.49 | 15.41 | 1.28 | 25.25  | 0.0825 |

|      |       |       |      |        |        |
|------|-------|-------|------|--------|--------|
| 0.44 | 30.55 | 12.00 | 1.17 | 7.20   | 0.0785 |
| 0.58 | 41.24 | 14.14 | 1.40 | 35.36  | 0.0924 |
| 0.61 | 43.05 | 19.88 | 1.25 | 33.60  | 0.0777 |
| 0.59 | 41.81 | 16.37 | 1.33 | 26.88  | 0.0851 |
| 0.58 | 41.29 | 15.97 | 1.32 | 27.84  | 0.0848 |
| 0.62 | 43.60 | 16.76 | 1.38 | 59.28  | 0.0876 |
| 0.59 | 42.02 | 13.26 | 1.48 | 29.70  | 0.0983 |
| 0.58 | 41.64 | 16.62 | 1.31 | 91.80  | 0.0825 |
| 0.56 | 40.24 | 13.47 | 1.40 | 31.05  | 0.0921 |
| 0.56 | 40.40 | 15.05 | 1.33 | 55.44  | 0.0850 |
| 0.55 | 39.90 | 14.19 | 1.35 | 24.96  | 0.0886 |
| 0.59 | 41.98 | 19.77 | 1.21 | 36.25  | 0.0753 |
| 0.58 | 41.52 | 14.73 | 1.39 | 40.31  | 0.0902 |
| 0.61 | 43.31 | 19.08 | 1.29 | 36.40  | 0.0799 |
| 0.52 | 37.52 | 11.96 | 1.38 | 57.12  | 0.0927 |
| 0.62 | 43.92 | 18.07 | 1.35 | 61.18  | 0.0842 |
| 0.57 | 40.67 | 17.41 | 1.24 | 88.96  | 0.0780 |
| 0.48 | 34.26 | 13.70 | 1.19 | 14.52  | 0.0788 |
| 0.49 | 35.04 | 13.65 | 1.21 | 15.30  | 0.0800 |
| 0.60 | 42.44 | 17.72 | 1.30 | 69.44  | 0.0819 |
| 0.58 | 41.68 | 17.55 | 1.28 | 58.09  | 0.0796 |
| 0.43 | 29.13 | 16.00 | 0.98 | 13.38  | 0.0628 |
| 0.44 | 30.29 | 14.07 | 1.07 | 6.60   | 0.0707 |
| 0.60 | 42.52 | 19.17 | 1.25 | 22.44  | 0.0776 |
| 0.47 | 33.26 | 12.64 | 1.21 | 25.20  | 0.0801 |
| 0.66 | 45.90 | 17.99 | 1.44 | 35.88  | 0.0908 |
| 0.48 | 34.40 | 13.96 | 1.18 | 51.51  | 0.0770 |
| 0.50 | 36.28 | 11.97 | 1.34 | 20.58  | 0.0906 |
| 0.55 | 39.46 | 12.96 | 1.39 | 31.05  | 0.0930 |
| 0.58 | 41.48 | 17.38 | 1.27 | 43.42  | 0.0811 |
| 0.48 | 34.57 | 12.96 | 1.23 | 21.72  | 0.0822 |
| 0.64 | 44.75 | 19.56 | 1.33 | 89.68  | 0.0824 |
| 0.55 | 39.54 | 15.91 | 1.26 | 23.31  | 0.0816 |
| 0.52 | 37.48 | 13.96 | 1.27 | 51.06  | 0.0832 |
| 0.56 | 40.37 | 16.38 | 1.27 | 70.18  | 0.0809 |
| 0.58 | 41.24 | 17.35 | 1.27 | 63.44  | 0.0806 |
| 0.56 | 40.52 | 18.44 | 1.20 | 50.44  | 0.0756 |
| 0.59 | 42.18 | 18.19 | 1.27 | 28.52  | 0.0799 |
| 0.58 | 41.24 | 16.07 | 1.32 | 48.88  | 0.0848 |
| 0.61 | 43.08 | 18.13 | 1.31 | 84.36  | 0.0816 |
| 0.58 | 41.58 | 16.04 | 1.33 | 194.32 | 0.0856 |
| 0.49 | 35.07 | 12.72 | 1.26 | 15.47  | 0.0835 |
| 0.49 | 34.96 | 12.17 | 1.28 | 14.82  | 0.0853 |
| 0.56 | 40.47 | 15.97 | 1.29 | 105.03 | 0.0829 |
| 0.57 | 40.83 | 16.75 | 1.27 | 53.65  | 0.0809 |
| 0.56 | 40.60 | 16.43 | 1.28 | 28.42  | 0.0813 |
| 0.62 | 43.67 | 18.62 | 1.32 | 39.20  | 0.0834 |
| 0.64 | 44.91 | 19.12 | 1.35 | 73.78  | 0.0848 |
| 0.64 | 44.99 | 17.72 | 1.41 | 137.35 | 0.0883 |
| 0.51 | 37.03 | 14.24 | 1.25 | 21.20  | 0.0815 |
| 0.60 | 42.81 | 17.37 | 1.33 | 29.04  | 0.0839 |

|      |       |       |      |        |        |
|------|-------|-------|------|--------|--------|
| 0.56 | 40.29 | 18.07 | 1.21 | 22.10  | 0.0760 |
| 0.66 | 45.80 | 19.75 | 1.37 | 118.49 | 0.0847 |
| 0.50 | 36.00 | 12.24 | 1.31 | 24.48  | 0.0878 |
| 0.56 | 40.42 | 17.59 | 1.23 | 25.48  | 0.0774 |
| 0.55 | 39.65 | 13.56 | 1.37 | 62.91  | 0.0900 |
| 0.50 | 35.71 | 14.98 | 1.18 | 15.12  | 0.0771 |
| 0.52 | 37.65 | 14.95 | 1.24 | 23.10  | 0.0802 |
| 0.45 | 31.52 | 11.34 | 1.23 | 12.69  | 0.0834 |
| 0.43 | 29.85 | 11.85 | 1.15 | 4.83   | 0.0779 |
| 0.58 | 41.52 | 16.89 | 1.29 | 18.85  | 0.0824 |
| 0.66 | 45.55 | 17.46 | 1.44 | 51.30  | 0.0929 |
| 0.54 | 38.72 | 14.81 | 1.28 | 23.00  | 0.0830 |
| 0.59 | 42.04 | 15.70 | 1.36 | 24.70  | 0.0866 |
| 0.63 | 44.22 | 20.18 | 1.29 | 33.92  | 0.0800 |
| 0.56 | 40.20 | 16.40 | 1.27 | 26.22  | 0.0813 |
| 0.59 | 41.84 | 16.80 | 1.31 | 50.84  | 0.0832 |
| 0.52 | 37.90 | 15.69 | 1.22 | 22.89  | 0.0782 |
| 0.56 | 40.19 | 14.24 | 1.36 | 40.04  | 0.0885 |
| 0.54 | 38.72 | 14.81 | 1.28 | 19.32  | 0.0830 |
| 0.49 | 34.86 | 14.07 | 1.19 | 39.00  | 0.0785 |
| 0.63 | 44.00 | 16.80 | 1.40 | 96.20  | 0.0888 |
| 0.56 | 40.00 | 14.67 | 1.33 | 19.36  | 0.0873 |
| 0.61 | 43.45 | 17.31 | 1.35 | 74.16  | 0.0855 |
| 0.62 | 43.66 | 18.51 | 1.32 | 97.56  | 0.0824 |
| 0.59 | 42.00 | 17.31 | 1.30 | 18.88  | 0.0819 |
| 0.56 | 40.44 | 16.60 | 1.27 | 27.20  | 0.0799 |
| 0.65 | 45.38 | 18.89 | 1.38 | 29.26  | 0.0863 |
| 0.54 | 38.70 | 11.95 | 1.42 | 16.00  | 0.0972 |
| 0.38 | 23.14 | 10.80 | 1.06 | -2.46  | 0.0726 |
| 0.48 | 34.36 | 14.24 | 1.17 | 19.35  | 0.0762 |
| 0.59 | 42.05 | 15.42 | 1.38 | 18.48  | 0.0893 |
| 0.48 | 33.97 | 13.61 | 1.18 | 14.85  | 0.0785 |
| 0.65 | 45.23 | 19.53 | 1.35 | 33.12  | 0.0829 |
| 0.54 | 39.00 | 15.12 | 1.28 | 36.52  | 0.0828 |
| 0.57 | 40.65 | 17.09 | 1.26 | 122.92 | 0.0795 |
| 0.58 | 41.43 | 14.58 | 1.39 | 23.23  | 0.0917 |
| 0.59 | 42.09 | 17.12 | 1.31 | 78.20  | 0.0824 |
| 0.58 | 41.45 | 15.66 | 1.34 | 25.80  | 0.0862 |
| 0.64 | 44.94 | 19.60 | 1.33 | 40.68  | 0.0831 |
| 0.61 | 43.23 | 18.07 | 1.32 | 37.44  | 0.0825 |
| 0.54 | 38.82 | 13.18 | 1.36 | 24.03  | 0.0893 |
| 0.59 | 42.17 | 17.41 | 1.30 | 100.80 | 0.0814 |
| 0.54 | 39.10 | 16.60 | 1.22 | 33.02  | 0.0774 |
| 0.49 | 34.93 | 16.15 | 1.11 | 17.00  | 0.0709 |
| 0.65 | 45.17 | 20.05 | 1.33 | 78.66  | 0.0823 |
| 0.41 | 26.97 | 11.39 | 1.11 | 2.08   | 0.0752 |
| 0.48 | 34.55 | 13.34 | 1.21 | 10.12  | 0.0808 |
| 0.65 | 45.30 | 20.07 | 1.33 | 46.20  | 0.0821 |
| 0.59 | 42.21 | 15.74 | 1.37 | 27.84  | 0.0884 |
| 0.47 | 33.14 | 12.30 | 1.22 | 9.48   | 0.0819 |
| 0.41 | 26.65 | 12.56 | 1.05 | 5.96   | 0.0699 |

|      |       |       |      |        |        |
|------|-------|-------|------|--------|--------|
| 0.53 | 38.20 | 14.50 | 1.27 | 22.56  | 0.0827 |
| 0.54 | 38.80 | 16.18 | 1.23 | 112.56 | 0.0783 |
| 0.56 | 40.42 | 16.47 | 1.27 | 37.52  | 0.0809 |
| 0.59 | 42.15 | 16.70 | 1.33 | 25.74  | 0.0842 |
| 0.52 | 37.25 | 16.65 | 1.16 | 27.28  | 0.0736 |
| 0.54 | 38.86 | 15.73 | 1.25 | 23.37  | 0.0808 |
| 0.46 | 32.57 | 11.96 | 1.22 | 14.88  | 0.0821 |
| 0.60 | 42.67 | 18.00 | 1.30 | 34.32  | 0.0826 |
| 0.59 | 41.98 | 16.97 | 1.31 | 60.61  | 0.0834 |
| 0.59 | 42.00 | 14.31 | 1.43 | 16.94  | 0.0948 |
| 0.54 | 38.72 | 13.22 | 1.35 | 25.30  | 0.0896 |
| 0.56 | 40.49 | 15.57 | 1.31 | 40.61  | 0.0837 |
| 0.48 | 34.63 | 11.47 | 1.31 | 16.65  | 0.0887 |
| 0.61 | 43.07 | 15.42 | 1.42 | 69.88  | 0.0918 |
| 0.35 | 19.27 | 9.93  | 1.03 | -2.67  | 0.0709 |
| 0.56 | 40.04 | 12.82 | 1.43 | 43.71  | 0.0939 |
| 0.54 | 38.82 | 14.20 | 1.31 | 50.49  | 0.0850 |
| 0.45 | 31.94 | 11.82 | 1.21 | 14.74  | 0.0816 |
| 0.52 | 37.23 | 14.47 | 1.24 | 34.96  | 0.0806 |
| 0.58 | 41.35 | 16.63 | 1.30 | 57.96  | 0.0829 |
| 0.51 | 37.15 | 16.28 | 1.17 | 28.20  | 0.0748 |
| 0.57 | 41.18 | 15.42 | 1.34 | 32.40  | 0.0868 |
| 0.53 | 38.05 | 12.88 | 1.35 | 73.80  | 0.0880 |
| 0.55 | 39.37 | 15.66 | 1.27 | 37.00  | 0.0813 |
| 0.59 | 42.14 | 19.20 | 1.24 | 114.60 | 0.0771 |
| 0.61 | 43.42 | 21.30 | 1.22 | 52.26  | 0.0740 |
| 0.49 | 35.15 | 11.81 | 1.31 | 10.40  | 0.0888 |
| 0.55 | 39.33 | 14.79 | 1.30 | 52.78  | 0.0843 |
| 0.62 | 43.53 | 18.59 | 1.31 | 52.50  | 0.0819 |
| 0.48 | 34.08 | 14.80 | 1.14 | 33.75  | 0.0737 |
| 0.58 | 41.62 | 17.59 | 1.27 | 59.21  | 0.0801 |
| 0.57 | 40.82 | 17.03 | 1.26 | 23.00  | 0.0806 |
| 0.57 | 41.00 | 16.40 | 1.29 | 32.12  | 0.0837 |
| 0.63 | 44.00 | 18.75 | 1.32 | 152.64 | 0.0833 |
| 0.64 | 44.94 | 17.03 | 1.43 | 79.20  | 0.0913 |
| 0.49 | 35.17 | 11.96 | 1.30 | 13.58  | 0.0878 |
| 0.57 | 41.12 | 16.53 | 1.29 | 38.36  | 0.0826 |
| 0.50 | 35.75 | 13.18 | 1.26 | 27.72  | 0.0823 |
| 0.58 | 41.23 | 14.52 | 1.38 | 48.90  | 0.0900 |
| 0.60 | 42.74 | 14.48 | 1.45 | 75.52  | 0.0951 |
| 0.53 | 38.50 | 14.52 | 1.28 | 27.06  | 0.0838 |
| 0.46 | 32.52 | 12.74 | 1.18 | 13.64  | 0.0788 |
| 0.59 | 41.98 | 16.97 | 1.31 | 52.49  | 0.0834 |
| 0.61 | 43.47 | 19.68 | 1.27 | 27.72  | 0.0790 |
| 0.41 | 27.29 | 11.04 | 1.13 | 4.24   | 0.0773 |
| 0.57 | 40.88 | 16.27 | 1.30 | 39.48  | 0.0828 |
| 0.53 | 38.47 | 15.18 | 1.25 | 32.43  | 0.0811 |
| 0.62 | 43.61 | 18.44 | 1.32 | 90.44  | 0.0828 |
| 0.43 | 29.75 | 11.29 | 1.18 | 7.92   | 0.0805 |
| 0.53 | 38.14 | 13.19 | 1.33 | 37.18  | 0.0876 |
| 0.41 | 27.69 | 10.85 | 1.15 | 6.65   | 0.0783 |

|      |       |       |      |        |        |
|------|-------|-------|------|--------|--------|
| 0.51 | 36.77 | 14.24 | 1.24 | 28.20  | 0.0808 |
| 0.54 | 38.82 | 14.76 | 1.28 | 18.80  | 0.0840 |
| 0.52 | 37.33 | 14.76 | 1.24 | 22.27  | 0.0808 |
| 0.59 | 41.98 | 18.51 | 1.25 | 57.71  | 0.0787 |
| 0.55 | 39.56 | 12.33 | 1.43 | 28.65  | 0.0981 |
| 0.57 | 40.70 | 17.49 | 1.24 | 34.75  | 0.0789 |
| 0.58 | 41.70 | 17.25 | 1.29 | 53.20  | 0.0808 |
| 0.57 | 40.88 | 17.41 | 1.25 | 28.08  | 0.0798 |
| 0.51 | 36.53 | 13.88 | 1.25 | 152.49 | 0.0822 |
| 0.59 | 41.91 | 16.00 | 1.35 | 78.60  | 0.0864 |
| 0.51 | 37.04 | 14.52 | 1.24 | 35.53  | 0.0806 |
| 0.63 | 44.17 | 16.87 | 1.40 | 55.30  | 0.0895 |
| 0.64 | 44.75 | 18.67 | 1.36 | 24.32  | 0.0850 |
| 0.55 | 39.86 | 13.63 | 1.38 | 93.50  | 0.0907 |
| 0.57 | 40.65 | 17.68 | 1.23 | 42.28  | 0.0777 |
| 0.60 | 42.82 | 16.64 | 1.36 | 27.30  | 0.0868 |
| 0.61 | 42.96 | 18.94 | 1.28 | 88.40  | 0.0795 |
| 0.55 | 39.84 | 15.16 | 1.30 | 140.56 | 0.0839 |
| 0.57 | 40.66 | 15.24 | 1.33 | 73.50  | 0.0855 |
| 0.52 | 37.79 | 10.29 | 1.50 | 12.80  | 0.1035 |
| 0.49 | 35.22 | 13.57 | 1.22 | 25.65  | 0.0800 |
| 0.47 | 33.65 | 13.73 | 1.17 | 23.90  | 0.0775 |
| 0.63 | 44.41 | 20.85 | 1.27 | 39.60  | 0.0791 |
| 0.55 | 39.33 | 15.73 | 1.26 | 27.60  | 0.0819 |
| 0.46 | 32.76 | 12.31 | 1.21 | 11.30  | 0.0814 |
| 0.53 | 38.25 | 14.23 | 1.29 | 23.54  | 0.0842 |
| 0.61 | 42.96 | 16.80 | 1.35 | 71.06  | 0.0860 |
| 0.58 | 41.73 | 16.92 | 1.30 | 49.29  | 0.0825 |
| 0.53 | 38.35 | 14.84 | 1.27 | 36.45  | 0.0813 |
| 0.62 | 43.62 | 15.71 | 1.43 | 57.53  | 0.0924 |
| 0.56 | 40.05 | 15.97 | 1.28 | 23.14  | 0.0819 |
| 0.51 | 36.77 | 14.52 | 1.23 | 17.20  | 0.0798 |
| 0.55 | 39.41 | 16.22 | 1.25 | 44.28  | 0.0792 |
| 0.64 | 44.69 | 16.23 | 1.45 | 62.32  | 0.0926 |
| 0.50 | 35.86 | 12.56 | 1.29 | 10.95  | 0.0865 |
| 0.50 | 36.27 | 14.76 | 1.20 | 17.55  | 0.0786 |
| 0.57 | 40.65 | 18.22 | 1.22 | 42.28  | 0.0762 |
| 0.58 | 41.45 | 16.09 | 1.32 | 34.80  | 0.0847 |
| 0.49 | 35.46 | 12.44 | 1.28 | 24.64  | 0.0859 |
| 0.48 | 34.31 | 12.96 | 1.22 | 19.50  | 0.0815 |
| 0.46 | 32.29 | 12.70 | 1.18 | 8.40   | 0.0783 |
| 0.45 | 31.71 | 11.55 | 1.22 | 16.56  | 0.0822 |
| 0.42 | 28.46 | 13.12 | 1.07 | 3.51   | 0.0711 |
| 0.58 | 41.52 | 17.19 | 1.28 | 61.77  | 0.0814 |
| 0.62 | 43.79 | 16.75 | 1.39 | 76.22  | 0.0884 |
| 0.57 | 41.06 | 13.78 | 1.41 | 27.00  | 0.0936 |
| 0.51 | 36.99 | 13.08 | 1.30 | 54.28  | 0.0856 |
| 0.58 | 41.25 | 15.64 | 1.34 | 15.62  | 0.0871 |
| 0.58 | 41.24 | 15.74 | 1.33 | 55.90  | 0.0860 |
| 0.66 | 45.70 | 17.87 | 1.43 | 79.55  | 0.0900 |
| 0.63 | 44.35 | 19.42 | 1.32 | 41.25  | 0.0823 |

|      |       |       |      |        |        |
|------|-------|-------|------|--------|--------|
| 0.46 | 32.52 | 12.44 | 1.20 | 8.47   | 0.0801 |
| 0.62 | 43.96 | 16.02 | 1.43 | 116.00 | 0.0911 |
| 0.49 | 34.89 | 15.42 | 1.14 | 12.88  | 0.0735 |
| 0.62 | 43.78 | 14.43 | 1.50 | 257.92 | 0.0984 |
| 0.53 | 38.47 | 15.43 | 1.24 | 51.06  | 0.0802 |
| 0.44 | 30.53 | 11.85 | 1.17 | 7.74   | 0.0795 |
| 0.62 | 43.91 | 16.74 | 1.40 | 25.76  | 0.0903 |
| 0.61 | 43.45 | 16.75 | 1.38 | 40.32  | 0.0874 |
| 0.61 | 43.45 | 17.03 | 1.37 | 74.88  | 0.0865 |
| 0.54 | 39.18 | 15.91 | 1.25 | 39.96  | 0.0797 |
| 0.58 | 41.35 | 15.72 | 1.34 | 21.84  | 0.0861 |
| 0.48 | 34.29 | 14.46 | 1.16 | 14.88  | 0.0758 |
| 0.71 | 47.78 | 21.89 | 1.39 | 106.21 | 0.0854 |
| 0.58 | 41.54 | 18.47 | 1.24 | 34.25  | 0.0783 |
| 0.43 | 29.53 | 10.65 | 1.21 | 12.80  | 0.0824 |
| 0.45 | 31.15 | 12.80 | 1.14 | 11.36  | 0.0763 |
| 0.59 | 41.91 | 16.59 | 1.32 | 49.80  | 0.0843 |
| 0.51 | 36.89 | 13.86 | 1.26 | 16.80  | 0.0824 |
| 0.53 | 38.47 | 17.94 | 1.15 | 45.54  | 0.0725 |
| 0.64 | 44.57 | 17.27 | 1.40 | 31.35  | 0.0897 |
| 0.57 | 40.65 | 15.38 | 1.32 | 42.84  | 0.0853 |
| 0.43 | 29.33 | 12.05 | 1.13 | 8.64   | 0.0759 |
| 0.59 | 42.09 | 16.59 | 1.33 | 95.54  | 0.0842 |
| 0.52 | 37.50 | 12.59 | 1.34 | 32.12  | 0.0893 |
| 0.47 | 33.65 | 12.06 | 1.25 | 24.60  | 0.0845 |
| 0.58 | 41.52 | 16.00 | 1.33 | 26.10  | 0.0854 |
| 0.62 | 43.50 | 17.91 | 1.33 | 60.04  | 0.0835 |
| 0.53 | 38.03 | 14.52 | 1.27 | 83.16  | 0.0827 |
| 0.58 | 41.68 | 14.89 | 1.39 | 38.87  | 0.0911 |
| 0.54 | 38.68 | 15.64 | 1.24 | 39.36  | 0.0799 |
| 0.63 | 44.40 | 19.47 | 1.32 | 104.16 | 0.0810 |
| 0.46 | 32.11 | 11.66 | 1.22 | 7.84   | 0.0821 |
| 0.55 | 39.61 | 15.39 | 1.29 | 43.00  | 0.0829 |
| 0.55 | 39.81 | 15.86 | 1.27 | 66.04  | 0.0816 |
| 0.64 | 44.72 | 22.04 | 1.25 | 30.60  | 0.0763 |
| 0.58 | 41.29 | 17.08 | 1.28 | 13.63  | 0.0811 |
| 0.48 | 34.36 | 13.38 | 1.20 | 28.80  | 0.0795 |
| 0.57 | 41.00 | 16.84 | 1.28 | 22.20  | 0.0809 |
| 0.43 | 29.75 | 12.03 | 1.14 | 7.08   | 0.0772 |
| 0.49 | 35.44 | 13.40 | 1.24 | 18.46  | 0.0823 |
| 0.64 | 44.70 | 19.09 | 1.34 | 47.26  | 0.0842 |
| 0.57 | 41.12 | 18.52 | 1.22 | 40.32  | 0.0766 |
| 0.55 | 39.68 | 17.12 | 1.22 | 50.76  | 0.0786 |
| 0.55 | 39.72 | 16.73 | 1.24 | 146.16 | 0.0783 |
| 0.54 | 39.10 | 13.70 | 1.34 | 51.22  | 0.0880 |
| 0.44 | 30.41 | 13.70 | 1.09 | 7.00   | 0.0712 |
| 0.55 | 39.41 | 14.31 | 1.33 | 53.04  | 0.0867 |
| 0.43 | 29.11 | 11.46 | 1.16 | 2.31   | 0.0791 |
| 0.59 | 41.88 | 16.40 | 1.33 | 47.25  | 0.0854 |
| 0.61 | 42.98 | 13.62 | 1.51 | 44.80  | 0.1002 |
| 0.69 | 47.00 | 19.35 | 1.44 | 60.06  | 0.0899 |

|      |       |       |      |       |        |
|------|-------|-------|------|-------|--------|
| 0.48 | 34.61 | 15.42 | 1.13 | 17.92 | 0.0730 |
| 0.60 | 42.43 | 17.48 | 1.31 | 24.96 | 0.0835 |
| 0.40 | 25.67 | 10.89 | 1.10 | 3.22  | 0.0755 |
| 0.56 | 40.05 | 15.10 | 1.31 | 60.84 | 0.0850 |
| 0.64 | 44.82 | 16.40 | 1.45 | 94.85 | 0.0934 |
| 0.39 | 25.35 | 11.63 | 1.06 | 6.68  | 0.0714 |
| 0.51 | 36.58 | 14.11 | 1.24 | 11.99 | 0.0825 |
| 0.57 | 41.06 | 15.95 | 1.31 | 70.76 | 0.0843 |
| 0.62 | 43.79 | 19.82 | 1.28 | 69.19 | 0.0790 |
| 0.59 | 41.90 | 16.58 | 1.32 | 55.20 | 0.0860 |
| 0.52 | 37.73 | 14.50 | 1.26 | 47.84 | 0.0817 |
| 0.51 | 36.76 | 13.83 | 1.26 | 61.95 | 0.0822 |
| 0.60 | 42.74 | 18.99 | 1.27 | 31.62 | 0.0787 |
| 0.52 | 37.67 | 12.94 | 1.33 | 27.82 | 0.0874 |
| 0.60 | 42.67 | 17.19 | 1.33 | 78.05 | 0.0837 |
| 0.46 | 32.62 | 12.05 | 1.22 | 16.12 | 0.0816 |
| 0.50 | 35.62 | 12.32 | 1.29 | 19.74 | 0.0859 |
| 0.60 | 42.59 | 19.05 | 1.26 | 50.70 | 0.0787 |
| 0.61 | 43.13 | 16.76 | 1.36 | 73.37 | 0.0875 |
| 0.47 | 33.78 | 14.24 | 1.15 | 13.30 | 0.0752 |
| 0.59 | 41.96 | 15.14 | 1.39 | 51.84 | 0.0888 |
| 0.54 | 39.00 | 16.04 | 1.24 | 13.86 | 0.0796 |
| 0.54 | 38.89 | 16.43 | 1.22 | 39.75 | 0.0776 |
| 0.66 | 45.80 | 18.51 | 1.41 | 48.40 | 0.0887 |
| 0.60 | 42.89 | 18.89 | 1.27 | 40.96 | 0.0797 |
| 0.61 | 43.14 | 14.74 | 1.45 | 31.60 | 0.0935 |
| 0.45 | 31.22 | 12.74 | 1.15 | 6.12  | 0.0765 |
| 0.75 | 49.33 | 21.77 | 1.47 | 94.00 | 0.0905 |
| 0.57 | 40.61 | 14.03 | 1.38 | 62.31 | 0.0901 |
| 0.50 | 36.00 | 11.50 | 1.35 | 31.54 | 0.0913 |
| 0.51 | 36.76 | 15.66 | 1.18 | 48.51 | 0.0757 |
| 0.57 | 41.18 | 15.42 | 1.34 | 17.28 | 0.0868 |
| 0.60 | 42.59 | 17.00 | 1.33 | 38.70 | 0.0849 |
| 0.63 | 44.37 | 15.84 | 1.46 | 58.40 | 0.0932 |
| 0.60 | 42.43 | 15.34 | 1.40 | 31.20 | 0.0911 |
| 0.49 | 35.44 | 12.53 | 1.28 | 19.18 | 0.0858 |
| 0.46 | 32.86 | 13.07 | 1.18 | 39.36 | 0.0780 |
| 0.41 | 27.38 | 11.41 | 1.12 | 10.36 | 0.0752 |
| 0.59 | 41.93 | 14.84 | 1.40 | 29.90 | 0.0921 |
| 0.57 | 41.12 | 16.76 | 1.29 | 75.12 | 0.0825 |
| 0.62 | 43.56 | 17.03 | 1.37 | 30.72 | 0.0874 |
| 0.57 | 40.72 | 15.50 | 1.32 | 34.41 | 0.0846 |
| 0.58 | 41.52 | 18.37 | 1.24 | 52.49 | 0.0779 |
| 0.48 | 34.06 | 13.94 | 1.17 | 13.44 | 0.0769 |
| 0.50 | 35.72 | 14.76 | 1.19 | 23.94 | 0.0776 |
| 0.50 | 36.00 | 14.52 | 1.20 | 41.22 | 0.0783 |
| 0.48 | 33.89 | 15.38 | 1.11 | 25.02 | 0.0710 |
| 0.48 | 34.14 | 13.77 | 1.18 | 9.84  | 0.0781 |
| 0.59 | 42.36 | 16.97 | 1.32 | 60.30 | 0.0844 |
| 0.49 | 35.44 | 13.17 | 1.25 | 23.94 | 0.0830 |
| 0.57 | 41.00 | 16.13 | 1.31 | 33.60 | 0.0836 |

|      |       |       |      |        |        |
|------|-------|-------|------|--------|--------|
| 0.61 | 43.23 | 17.25 | 1.35 | 56.88  | 0.0851 |
| 0.47 | 33.87 | 11.66 | 1.28 | 27.54  | 0.0855 |
| 0.59 | 42.22 | 18.51 | 1.26 | 139.20 | 0.0789 |
| 0.61 | 42.97 | 17.00 | 1.35 | 46.50  | 0.0859 |
| 0.57 | 41.17 | 16.65 | 1.29 | 39.37  | 0.0819 |
| 0.56 | 40.46 | 15.14 | 1.33 | 14.35  | 0.0870 |
| 0.56 | 40.10 | 13.30 | 1.40 | 43.50  | 0.0928 |
| 0.59 | 42.19 | 16.07 | 1.35 | 68.12  | 0.0876 |
| 0.61 | 43.27 | 16.74 | 1.37 | 31.50  | 0.0879 |
| 0.53 | 38.08 | 12.85 | 1.35 | 17.29  | 0.0902 |
| 0.61 | 43.11 | 16.90 | 1.36 | 31.36  | 0.0865 |
| 0.50 | 35.66 | 11.10 | 1.36 | 63.18  | 0.0928 |
| 0.57 | 40.71 | 16.74 | 1.27 | 44.28  | 0.0809 |
| 0.54 | 39.17 | 14.52 | 1.31 | 45.60  | 0.0852 |
| 0.58 | 41.58 | 15.58 | 1.35 | 34.16  | 0.0873 |
| 0.59 | 41.95 | 17.44 | 1.29 | 59.02  | 0.0823 |
| 0.56 | 40.34 | 15.73 | 1.30 | 26.00  | 0.0837 |
| 0.51 | 36.80 | 16.06 | 1.17 | 72.42  | 0.0752 |
| 0.48 | 34.00 | 12.75 | 1.22 | 11.88  | 0.0818 |
| 0.57 | 40.76 | 14.81 | 1.35 | 21.06  | 0.0882 |
| 0.58 | 41.23 | 16.89 | 1.28 | 82.20  | 0.0814 |
| 0.50 | 36.00 | 13.43 | 1.25 | 45.60  | 0.0821 |
| 0.59 | 42.12 | 17.75 | 1.29 | 66.69  | 0.0816 |
| 0.57 | 40.76 | 17.89 | 1.23 | 45.24  | 0.0777 |
| 0.52 | 37.35 | 15.05 | 1.22 | 33.12  | 0.0800 |
| 0.54 | 39.16 | 14.58 | 1.30 | 13.32  | 0.0860 |
| 0.51 | 36.55 | 15.74 | 1.17 | 11.70  | 0.0759 |
| 0.62 | 43.53 | 17.72 | 1.34 | 36.40  | 0.0846 |
| 0.57 | 40.83 | 18.01 | 1.23 | 63.51  | 0.0771 |
| 0.62 | 43.71 | 15.31 | 1.45 | 49.78  | 0.0934 |
| 0.52 | 37.54 | 15.11 | 1.23 | 26.40  | 0.0795 |
| 0.62 | 43.96 | 18.86 | 1.32 | 71.20  | 0.0817 |
| 0.59 | 42.29 | 18.81 | 1.25 | 57.35  | 0.0784 |
| 0.62 | 43.91 | 17.83 | 1.35 | 40.59  | 0.0857 |
| 0.58 | 41.52 | 16.44 | 1.31 | 108.17 | 0.0838 |
| 0.62 | 43.53 | 15.77 | 1.42 | 39.55  | 0.0914 |
| 0.73 | 48.43 | 23.15 | 1.38 | 62.54  | 0.0832 |
| 0.54 | 38.97 | 13.61 | 1.34 | 33.76  | 0.0899 |
| 0.56 | 40.43 | 16.96 | 1.25 | 150.60 | 0.0791 |
| 0.52 | 37.25 | 13.70 | 1.28 | 36.30  | 0.0838 |
| 0.62 | 43.78 | 16.73 | 1.39 | 25.92  | 0.0892 |
| 0.52 | 37.79 | 14.84 | 1.25 | 75.80  | 0.0811 |
| 0.64 | 44.56 | 18.50 | 1.36 | 25.28  | 0.0858 |
| 0.60 | 42.60 | 15.29 | 1.40 | 83.07  | 0.0897 |
| 0.58 | 41.56 | 17.72 | 1.27 | 37.76  | 0.0794 |
| 0.55 | 39.37 | 16.23 | 1.24 | 62.00  | 0.0794 |
| 0.55 | 39.86 | 15.56 | 1.29 | 18.25  | 0.0830 |
| 0.60 | 42.59 | 17.09 | 1.33 | 98.34  | 0.0842 |
| 0.57 | 40.82 | 16.07 | 1.30 | 23.50  | 0.0838 |
| 0.53 | 38.44 | 14.79 | 1.27 | 62.88  | 0.0823 |
| 0.44 | 30.55 | 10.52 | 1.24 | 5.12   | 0.0857 |

|      |       |       |      |        |        |
|------|-------|-------|------|--------|--------|
| 0.53 | 38.53 | 13.05 | 1.36 | 36.83  | 0.0888 |
| 0.56 | 40.48 | 16.81 | 1.26 | 227.94 | 0.0798 |
| 0.48 | 34.70 | 10.70 | 1.36 | 19.38  | 0.0923 |
| 0.61 | 43.33 | 18.10 | 1.32 | 45.76  | 0.0833 |
| 0.62 | 43.50 | 19.32 | 1.28 | 32.70  | 0.0805 |
| 0.57 | 41.00 | 17.00 | 1.27 | 38.22  | 0.0811 |
| 0.62 | 43.74 | 18.67 | 1.32 | 39.55  | 0.0824 |
| 0.47 | 33.16 | 12.18 | 1.23 | 13.92  | 0.0817 |
| 0.57 | 40.88 | 17.41 | 1.25 | 42.48  | 0.0798 |
| 0.56 | 40.38 | 15.92 | 1.29 | 64.48  | 0.0822 |
| 0.52 | 37.77 | 14.52 | 1.26 | 28.35  | 0.0821 |
| 0.59 | 42.00 | 17.31 | 1.30 | 63.04  | 0.0819 |
| 0.62 | 43.50 | 17.10 | 1.37 | 120.00 | 0.0874 |
| 0.58 | 41.26 | 16.70 | 1.29 | 33.67  | 0.0811 |
| 0.56 | 40.52 | 17.68 | 1.23 | 26.26  | 0.0777 |
| 0.45 | 31.14 | 15.25 | 1.05 | 11.88  | 0.0673 |
| 0.57 | 40.94 | 16.32 | 1.30 | 26.73  | 0.0830 |
| 0.56 | 40.09 | 13.69 | 1.38 | 96.30  | 0.0902 |
| 0.50 | 36.39 | 14.37 | 1.22 | 12.96  | 0.0798 |
| 0.54 | 38.68 | 12.68 | 1.38 | 36.24  | 0.0919 |
| 0.61 | 43.03 | 18.37 | 1.30 | 53.13  | 0.0814 |
| 0.56 | 40.04 | 18.31 | 1.19 | 50.22  | 0.0740 |
| 0.65 | 45.05 | 18.26 | 1.39 | 176.12 | 0.0874 |
| 0.52 | 37.54 | 13.63 | 1.29 | 23.60  | 0.0852 |
| 0.49 | 35.44 | 15.41 | 1.15 | 13.65  | 0.0749 |
| 0.63 | 44.09 | 17.30 | 1.38 | 114.48 | 0.0875 |
| 0.55 | 39.76 | 14.24 | 1.34 | 59.13  | 0.0874 |
| 0.55 | 39.81 | 13.67 | 1.37 | 31.98  | 0.0901 |
| 0.53 | 38.17 | 15.61 | 1.23 | 39.25  | 0.0785 |
| 0.60 | 42.88 | 21.90 | 1.18 | 39.55  | 0.0718 |
| 0.57 | 40.94 | 16.02 | 1.31 | 54.27  | 0.0840 |
| 0.52 | 37.77 | 14.81 | 1.25 | 35.07  | 0.0810 |
| 0.47 | 33.33 | 11.72 | 1.26 | 24.31  | 0.0840 |
| 0.52 | 37.20 | 16.21 | 1.17 | 35.50  | 0.0743 |
| 0.55 | 39.53 | 15.31 | 1.29 | 102.06 | 0.0827 |
| 0.64 | 44.65 | 19.36 | 1.33 | 39.14  | 0.0826 |
| 0.49 | 35.34 | 14.51 | 1.18 | 18.90  | 0.0769 |
| 0.54 | 39.13 | 13.68 | 1.35 | 251.00 | 0.0884 |
| 0.56 | 40.19 | 16.98 | 1.24 | 54.60  | 0.0787 |
| 0.51 | 36.51 | 14.79 | 1.21 | 24.00  | 0.0782 |
| 0.52 | 37.48 | 14.33 | 1.26 | 36.34  | 0.0817 |
| 0.61 | 43.13 | 17.10 | 1.35 | 44.95  | 0.0864 |
| 0.53 | 38.56 | 16.07 | 1.22 | 33.00  | 0.0788 |
| 0.55 | 39.49 | 16.28 | 1.25 | 26.04  | 0.0791 |
| 0.42 | 28.00 | 12.12 | 1.10 | 2.12   | 0.0743 |
| 0.49 | 35.20 | 13.96 | 1.20 | 20.23  | 0.0788 |
| 0.51 | 36.76 | 13.70 | 1.26 | 25.41  | 0.0828 |
| 0.59 | 42.35 | 18.81 | 1.26 | 48.33  | 0.0792 |
| 0.51 | 37.14 | 15.35 | 1.21 | 42.84  | 0.0776 |
| 0.61 | 42.98 | 19.56 | 1.26 | 84.00  | 0.0787 |
| 0.55 | 39.54 | 17.41 | 1.21 | 49.14  | 0.0768 |

|      |       |       |      |        |        |
|------|-------|-------|------|--------|--------|
| 0.64 | 44.53 | 16.22 | 1.45 | 56.98  | 0.0927 |
| 0.55 | 39.45 | 16.67 | 1.23 | 57.13  | 0.0776 |
| 0.56 | 40.47 | 17.28 | 1.24 | 84.51  | 0.0786 |
| 0.52 | 37.71 | 14.45 | 1.26 | 16.92  | 0.0827 |
| 0.53 | 38.00 | 13.30 | 1.32 | 55.88  | 0.0875 |
| 0.57 | 40.84 | 17.82 | 1.24 | 111.21 | 0.0771 |
| 0.56 | 40.19 | 15.61 | 1.30 | 52.36  | 0.0832 |
| 0.58 | 41.62 | 18.15 | 1.25 | 52.08  | 0.0785 |
| 0.46 | 32.18 | 12.15 | 1.20 | 10.20  | 0.0808 |
| 0.57 | 40.82 | 16.52 | 1.28 | 59.00  | 0.0823 |
| 0.39 | 24.52 | 11.24 | 1.06 | 4.32   | 0.0718 |
| 0.50 | 36.00 | 14.36 | 1.21 | 10.40  | 0.0786 |
| 0.58 | 41.37 | 17.46 | 1.27 | 18.24  | 0.0809 |
| 0.57 | 40.77 | 17.80 | 1.23 | 210.00 | 0.0774 |
| 0.61 | 43.14 | 17.50 | 1.33 | 44.98  | 0.0856 |
| 0.51 | 37.04 | 14.81 | 1.22 | 28.31  | 0.0795 |
| 0.60 | 42.92 | 15.25 | 1.42 | 37.62  | 0.0918 |
| 0.54 | 38.78 | 18.57 | 1.14 | 17.64  | 0.0719 |
| 0.59 | 41.81 | 17.94 | 1.27 | 35.56  | 0.0800 |
| 0.48 | 34.68 | 12.40 | 1.26 | 22.86  | 0.0838 |
| 0.54 | 38.93 | 15.38 | 1.26 | 72.24  | 0.0814 |
| 0.65 | 45.26 | 19.60 | 1.35 | 50.32  | 0.0840 |
| 0.60 | 42.59 | 17.31 | 1.32 | 28.20  | 0.0839 |
| 0.54 | 38.77 | 16.38 | 1.22 | 27.00  | 0.0775 |
| 0.57 | 41.06 | 16.66 | 1.29 | 50.17  | 0.0818 |
| 0.52 | 37.37 | 13.84 | 1.28 | 11.25  | 0.0848 |
| 0.58 | 41.52 | 15.56 | 1.35 | 44.95  | 0.0870 |
| 0.57 | 40.88 | 17.14 | 1.26 | 19.32  | 0.0800 |
| 0.55 | 39.91 | 17.05 | 1.23 | 30.16  | 0.0776 |
| 0.61 | 43.23 | 17.80 | 1.33 | 28.80  | 0.0833 |
| 0.55 | 39.47 | 17.31 | 1.21 | 39.61  | 0.0776 |
| 0.54 | 39.16 | 16.03 | 1.24 | 12.96  | 0.0807 |
| 0.60 | 42.52 | 16.98 | 1.33 | 30.94  | 0.0842 |
| 0.62 | 43.74 | 20.12 | 1.27 | 82.60  | 0.0783 |
| 0.58 | 41.23 | 17.03 | 1.28 | 24.60  | 0.0809 |
| 0.43 | 29.04 | 12.00 | 1.13 | 12.98  | 0.0750 |
| 0.57 | 41.12 | 17.72 | 1.25 | 33.32  | 0.0788 |
| 0.55 | 39.59 | 14.32 | 1.33 | 12.40  | 0.0879 |
| 0.53 | 37.93 | 14.96 | 1.25 | 23.75  | 0.0802 |
| 0.43 | 29.94 | 11.39 | 1.18 | 3.76   | 0.0800 |
| 0.66 | 45.89 | 20.35 | 1.35 | 85.84  | 0.0840 |
| 0.48 | 34.52 | 12.86 | 1.23 | 62.56  | 0.0805 |
| 0.46 | 32.76 | 13.69 | 1.15 | 15.30  | 0.0758 |
| 0.56 | 40.52 | 17.84 | 1.22 | 42.64  | 0.0773 |
| 0.68 | 46.61 | 18.08 | 1.47 | 102.00 | 0.0930 |
| 0.53 | 38.33 | 12.98 | 1.35 | 195.44 | 0.0887 |
| 0.56 | 40.50 | 17.64 | 1.23 | 13.42  | 0.0784 |
| 0.50 | 35.60 | 13.43 | 1.24 | 34.51  | 0.0817 |
| 0.62 | 43.50 | 17.10 | 1.37 | 51.60  | 0.0874 |
| 0.49 | 35.49 | 13.18 | 1.25 | 16.60  | 0.0820 |
| 0.41 | 27.03 | 12.22 | 1.07 | 0.00   | 0.0726 |

|      |       |       |      |        |        |
|------|-------|-------|------|--------|--------|
| 0.53 | 37.90 | 13.82 | 1.30 | 23.92  | 0.0843 |
| 0.51 | 36.77 | 14.24 | 1.24 | 19.40  | 0.0808 |
| 0.59 | 41.98 | 15.73 | 1.36 | 70.47  | 0.0877 |
| 0.43 | 30.00 | 11.50 | 1.18 | 15.12  | 0.0788 |
| 0.61 | 42.98 | 16.76 | 1.36 | 37.52  | 0.0872 |
| 0.63 | 44.06 | 14.92 | 1.49 | 97.20  | 0.0959 |
| 0.58 | 41.41 | 20.15 | 1.18 | 58.32  | 0.0732 |
| 0.59 | 42.36 | 17.27 | 1.31 | 90.00  | 0.0833 |
| 0.55 | 39.75 | 14.79 | 1.32 | 23.98  | 0.0861 |
| 0.55 | 39.49 | 14.21 | 1.33 | 18.76  | 0.0866 |
| 0.55 | 39.86 | 17.78 | 1.20 | 40.75  | 0.0759 |
| 0.55 | 39.57 | 14.52 | 1.32 | 56.94  | 0.0859 |
| 0.58 | 41.56 | 17.19 | 1.28 | 39.36  | 0.0810 |
| 0.60 | 42.47 | 17.31 | 1.32 | 29.70  | 0.0840 |
| 0.55 | 39.65 | 16.00 | 1.26 | 39.69  | 0.0806 |
| 0.60 | 42.52 | 17.25 | 1.32 | 65.62  | 0.0833 |
| 0.48 | 34.31 | 12.65 | 1.24 | 15.99  | 0.0828 |
| 0.60 | 42.67 | 15.06 | 1.42 | 25.20  | 0.0914 |
| 0.52 | 37.79 | 18.44 | 1.12 | 23.20  | 0.0702 |
| 0.60 | 42.44 | 18.59 | 1.27 | 53.76  | 0.0793 |
| 0.57 | 40.94 | 13.17 | 1.44 | 45.88  | 0.0950 |
| 0.54 | 38.86 | 14.50 | 1.30 | 82.83  | 0.0830 |
| 0.51 | 36.77 | 13.68 | 1.26 | 14.60  | 0.0830 |
| 0.54 | 38.75 | 15.37 | 1.26 | 13.42  | 0.0813 |
| 0.51 | 37.11 | 12.54 | 1.33 | 48.07  | 0.0883 |
| 0.52 | 37.75 | 13.12 | 1.32 | 49.94  | 0.0875 |
| 0.51 | 36.53 | 16.00 | 1.16 | 13.86  | 0.0746 |
| 0.52 | 37.28 | 14.67 | 1.24 | 22.00  | 0.0805 |
| 0.58 | 41.37 | 16.41 | 1.31 | 35.52  | 0.0843 |
| 0.51 | 37.03 | 13.38 | 1.29 | 44.80  | 0.0849 |
| 0.51 | 37.05 | 13.57 | 1.28 | 34.38  | 0.0845 |
| 0.59 | 42.29 | 14.22 | 1.44 | 53.94  | 0.0945 |
| 0.52 | 37.79 | 15.36 | 1.23 | 13.60  | 0.0793 |
| 0.61 | 43.10 | 16.75 | 1.36 | 71.75  | 0.0865 |
| 0.60 | 42.52 | 16.32 | 1.36 | 51.77  | 0.0869 |
| 0.64 | 44.51 | 16.04 | 1.45 | 43.92  | 0.0935 |
| 0.62 | 43.67 | 20.48 | 1.25 | 49.00  | 0.0782 |
| 0.62 | 43.96 | 20.56 | 1.26 | 40.95  | 0.0778 |
| 0.56 | 40.30 | 15.18 | 1.32 | 47.88  | 0.0851 |
| 0.60 | 42.88 | 16.43 | 1.37 | 50.05  | 0.0870 |
| 0.59 | 42.07 | 17.72 | 1.28 | 100.44 | 0.0810 |
| 0.56 | 40.29 | 13.93 | 1.38 | 52.00  | 0.0904 |
| 0.60 | 42.73 | 16.86 | 1.34 | 54.80  | 0.0843 |
| 0.59 | 41.92 | 16.32 | 1.33 | 64.00  | 0.0837 |
| 0.51 | 36.80 | 14.95 | 1.21 | 19.04  | 0.0788 |
| 0.55 | 39.76 | 14.24 | 1.34 | 21.06  | 0.0874 |
| 0.54 | 38.72 | 14.81 | 1.28 | 36.80  | 0.0830 |
| 0.53 | 38.25 | 17.14 | 1.17 | 19.36  | 0.0744 |
| 0.61 | 42.96 | 15.32 | 1.42 | 50.16  | 0.0899 |
| 0.64 | 44.72 | 17.79 | 1.39 | 39.60  | 0.0880 |
| 0.47 | 33.68 | 14.14 | 1.15 | 9.24   | 0.0759 |

|      |       |       |      |        |        |
|------|-------|-------|------|--------|--------|
| 0.48 | 34.63 | 13.19 | 1.22 | 13.65  | 0.0809 |
| 0.51 | 36.78 | 13.80 | 1.26 | 34.77  | 0.0828 |
| 0.63 | 44.26 | 15.26 | 1.48 | 73.78  | 0.0962 |
| 0.59 | 41.81 | 17.00 | 1.30 | 74.48  | 0.0830 |
| 0.63 | 44.44 | 18.27 | 1.36 | 59.84  | 0.0862 |
| 0.62 | 43.95 | 18.01 | 1.35 | 78.30  | 0.0858 |
| 0.53 | 38.47 | 14.75 | 1.27 | 24.38  | 0.0826 |
| 0.61 | 43.45 | 18.73 | 1.30 | 34.92  | 0.0811 |
| 0.52 | 37.20 | 12.70 | 1.33 | 25.75  | 0.0875 |
| 0.60 | 42.67 | 17.38 | 1.32 | 23.78  | 0.0840 |
| 0.55 | 39.37 | 14.85 | 1.30 | 36.40  | 0.0838 |
| 0.56 | 40.60 | 14.65 | 1.35 | 71.63  | 0.0878 |
| 0.54 | 39.00 | 12.96 | 1.38 | 24.42  | 0.0918 |
| 0.64 | 44.57 | 17.78 | 1.38 | 73.26  | 0.0880 |
| 0.53 | 38.53 | 15.42 | 1.25 | 31.71  | 0.0807 |
| 0.54 | 39.25 | 16.37 | 1.23 | 38.50  | 0.0792 |
| 0.49 | 35.47 | 14.81 | 1.18 | 24.48  | 0.0763 |
| 0.52 | 37.20 | 13.90 | 1.27 | 43.00  | 0.0824 |
| 0.62 | 43.95 | 17.84 | 1.36 | 62.10  | 0.0863 |
| 0.51 | 36.40 | 16.80 | 1.13 | 46.58  | 0.0721 |
| 0.47 | 33.01 | 14.07 | 1.14 | 11.88  | 0.0752 |
| 0.57 | 40.83 | 15.36 | 1.33 | 91.93  | 0.0857 |
| 0.42 | 28.16 | 12.27 | 1.09 | 6.62   | 0.0735 |
| 0.49 | 34.79 | 11.93 | 1.29 | 10.48  | 0.0883 |
| 0.65 | 45.22 | 19.64 | 1.34 | 70.84  | 0.0828 |
| 0.69 | 47.18 | 21.72 | 1.37 | 62.04  | 0.0836 |
| 0.60 | 42.74 | 16.07 | 1.38 | 30.52  | 0.0890 |
| 0.50 | 36.26 | 14.10 | 1.23 | 31.20  | 0.0802 |
| 0.56 | 40.19 | 15.61 | 1.30 | 55.44  | 0.0832 |
| 0.61 | 42.97 | 16.21 | 1.38 | 30.07  | 0.0886 |
| 0.59 | 42.02 | 15.30 | 1.38 | 19.25  | 0.0902 |
| 0.57 | 40.63 | 17.38 | 1.24 | 18.96  | 0.0792 |
| 0.54 | 39.13 | 15.50 | 1.26 | 43.25  | 0.0813 |
| 0.48 | 34.31 | 14.50 | 1.16 | 9.49   | 0.0756 |
| 0.64 | 44.51 | 16.66 | 1.43 | 54.00  | 0.0912 |
| 0.59 | 42.33 | 17.14 | 1.32 | 89.20  | 0.0822 |
| 0.47 | 33.84 | 13.17 | 1.20 | 14.56  | 0.0790 |
| 0.61 | 43.27 | 18.36 | 1.31 | 31.16  | 0.0814 |
| 0.65 | 45.18 | 17.14 | 1.44 | 46.00  | 0.0912 |
| 0.61 | 43.25 | 19.35 | 1.27 | 47.85  | 0.0793 |
| 0.42 | 28.58 | 12.91 | 1.08 | 4.68   | 0.0719 |
| 0.52 | 37.65 | 15.01 | 1.23 | 50.22  | 0.0790 |
| 0.53 | 38.31 | 14.64 | 1.27 | 17.00  | 0.0832 |
| 0.54 | 39.29 | 15.54 | 1.27 | 22.41  | 0.0813 |
| 0.59 | 42.05 | 16.07 | 1.35 | 47.04  | 0.0869 |
| 0.55 | 39.41 | 16.44 | 1.24 | 48.96  | 0.0790 |
| 0.50 | 35.71 | 16.01 | 1.14 | 12.21  | 0.0740 |
| 0.53 | 38.44 | 14.24 | 1.29 | 64.32  | 0.0843 |
| 0.57 | 40.89 | 15.72 | 1.32 | 64.96  | 0.0841 |
| 0.61 | 43.47 | 15.14 | 1.45 | 33.35  | 0.0948 |
| 0.64 | 44.78 | 19.96 | 1.32 | 172.40 | 0.0811 |

|      |       |       |      |        |        |
|------|-------|-------|------|--------|--------|
| 0.48 | 34.24 | 13.97 | 1.18 | 12.50  | 0.0779 |
| 0.52 | 37.41 | 14.51 | 1.25 | 107.19 | 0.0802 |
| 0.44 | 30.85 | 12.55 | 1.15 | 21.68  | 0.0768 |
| 0.59 | 42.05 | 16.03 | 1.35 | 59.64  | 0.0870 |
| 0.52 | 37.79 | 15.66 | 1.21 | 22.00  | 0.0783 |
| 0.60 | 42.67 | 14.76 | 1.43 | 38.57  | 0.0937 |
| 0.50 | 36.00 | 13.73 | 1.24 | 12.80  | 0.0817 |
| 0.52 | 37.38 | 13.56 | 1.29 | 39.82  | 0.0847 |
| 0.56 | 40.57 | 16.35 | 1.28 | 49.45  | 0.0825 |
| 0.60 | 42.59 | 16.68 | 1.34 | 68.40  | 0.0860 |
| 0.54 | 39.17 | 13.97 | 1.33 | 32.40  | 0.0874 |
| 0.56 | 40.42 | 18.15 | 1.21 | 23.52  | 0.0758 |
| 0.56 | 40.14 | 15.28 | 1.31 | 69.31  | 0.0841 |
| 0.57 | 41.06 | 15.66 | 1.33 | 58.00  | 0.0853 |
| 0.52 | 37.82 | 14.17 | 1.28 | 14.63  | 0.0839 |
| 0.57 | 40.67 | 15.67 | 1.31 | 67.20  | 0.0837 |
| 0.54 | 38.89 | 16.15 | 1.23 | 31.75  | 0.0785 |
| 0.56 | 40.25 | 15.73 | 1.29 | 33.00  | 0.0840 |
| 0.41 | 27.38 | 13.91 | 1.01 | 0.00   | 0.0671 |
| 0.57 | 40.94 | 16.07 | 1.31 | 38.13  | 0.0832 |
| 0.46 | 32.67 | 12.99 | 1.17 | 9.84   | 0.0787 |
| 0.58 | 41.59 | 16.60 | 1.31 | 36.40  | 0.0826 |
| 0.52 | 37.32 | 14.48 | 1.25 | 9.72   | 0.0816 |
| 0.46 | 32.21 | 13.42 | 1.14 | 4.00   | 0.0760 |
| 0.55 | 39.70 | 14.95 | 1.31 | 35.19  | 0.0851 |
| 0.59 | 42.02 | 18.55 | 1.25 | 57.75  | 0.0793 |
| 0.56 | 40.42 | 17.03 | 1.25 | 36.68  | 0.0791 |
| 0.63 | 44.35 | 18.75 | 1.34 | 53.46  | 0.0842 |
| 0.51 | 37.13 | 17.12 | 1.14 | 6.50   | 0.0734 |
| 0.53 | 37.98 | 13.42 | 1.32 | 25.30  | 0.0867 |
| 0.59 | 42.05 | 14.14 | 1.44 | 56.28  | 0.0946 |
| 0.45 | 32.00 | 12.87 | 1.16 | 17.16  | 0.0770 |
| 0.62 | 43.82 | 21.32 | 1.23 | 21.75  | 0.0764 |
| 0.46 | 32.58 | 12.69 | 1.19 | 23.04  | 0.0779 |
| 0.61 | 43.25 | 16.75 | 1.37 | 65.67  | 0.0873 |
| 0.54 | 39.00 | 16.97 | 1.20 | 18.92  | 0.0767 |
| 0.60 | 42.52 | 17.52 | 1.31 | 44.88  | 0.0824 |
| 0.50 | 35.87 | 14.38 | 1.21 | 13.50  | 0.0786 |
| 0.65 | 45.25 | 17.95 | 1.41 | 306.25 | 0.0894 |
| 0.64 | 44.66 | 17.23 | 1.41 | 72.15  | 0.0892 |
| 0.46 | 32.71 | 11.92 | 1.23 | 21.00  | 0.0821 |
| 0.53 | 38.59 | 15.67 | 1.24 | 38.61  | 0.0790 |
| 0.55 | 39.50 | 15.42 | 1.28 | 34.54  | 0.0830 |
| 0.64 | 44.69 | 16.65 | 1.44 | 47.97  | 0.0910 |
| 0.59 | 42.30 | 17.59 | 1.30 | 76.16  | 0.0816 |
| 0.53 | 38.03 | 12.15 | 1.39 | 24.99  | 0.0932 |
| 0.48 | 34.40 | 13.64 | 1.19 | 13.94  | 0.0782 |
| 0.52 | 37.23 | 15.84 | 1.19 | 27.60  | 0.0759 |
| 0.46 | 32.57 | 11.96 | 1.22 | 16.44  | 0.0821 |
| 0.45 | 31.29 | 14.24 | 1.09 | 19.70  | 0.0710 |
| 0.58 | 41.33 | 16.59 | 1.30 | 61.44  | 0.0823 |

|      |       |       |      |        |        |
|------|-------|-------|------|--------|--------|
| 0.58 | 41.68 | 13.65 | 1.45 | 42.90  | 0.0953 |
| 0.66 | 45.58 | 18.64 | 1.40 | 58.90  | 0.0878 |
| 0.51 | 36.53 | 16.66 | 1.14 | 22.95  | 0.0728 |
| 0.60 | 42.67 | 17.71 | 1.31 | 58.00  | 0.0830 |
| 0.60 | 42.74 | 16.76 | 1.35 | 82.32  | 0.0865 |
| 0.50 | 36.00 | 13.80 | 1.23 | 18.00  | 0.0807 |
| 0.51 | 36.51 | 14.75 | 1.21 | 14.70  | 0.0782 |
| 0.61 | 43.17 | 17.14 | 1.35 | 102.68 | 0.0856 |
| 0.58 | 41.56 | 14.61 | 1.39 | 29.44  | 0.0903 |
| 0.59 | 42.00 | 14.80 | 1.40 | 45.12  | 0.0909 |
| 0.56 | 40.42 | 15.08 | 1.33 | 34.44  | 0.0858 |
| 0.57 | 40.74 | 17.04 | 1.26 | 13.32  | 0.0816 |
| 0.46 | 32.57 | 13.38 | 1.15 | 16.08  | 0.0762 |
| 0.55 | 39.95 | 17.40 | 1.22 | 25.20  | 0.0768 |
| 0.51 | 37.05 | 14.96 | 1.22 | 16.38  | 0.0792 |
| 0.55 | 39.68 | 14.20 | 1.34 | 40.02  | 0.0870 |
| 0.51 | 37.01 | 13.83 | 1.27 | 40.32  | 0.0829 |
| 0.63 | 44.13 | 17.06 | 1.39 | 123.09 | 0.0890 |
| 0.62 | 43.66 | 17.37 | 1.36 | 121.68 | 0.0860 |
| 0.56 | 40.58 | 15.74 | 1.31 | 85.25  | 0.0843 |
| 0.46 | 32.72 | 12.14 | 1.22 | 16.65  | 0.0822 |
| 0.56 | 40.42 | 15.17 | 1.32 | 36.10  | 0.0870 |
| 0.62 | 43.61 | 19.95 | 1.27 | 28.56  | 0.0785 |
| 0.49 | 34.90 | 15.11 | 1.15 | 22.95  | 0.0744 |
| 0.60 | 42.44 | 18.48 | 1.27 | 25.52  | 0.0800 |
| 0.54 | 39.10 | 15.39 | 1.27 | 44.46  | 0.0814 |
| 0.61 | 43.11 | 16.04 | 1.39 | 65.60  | 0.0896 |
| 0.51 | 36.77 | 16.19 | 1.16 | 47.00  | 0.0742 |
| 0.46 | 32.35 | 11.37 | 1.25 | 8.51   | 0.0847 |
| 0.51 | 36.79 | 16.02 | 1.17 | 18.36  | 0.0751 |
| 0.56 | 40.34 | 16.53 | 1.27 | 32.00  | 0.0809 |
| 0.52 | 37.27 | 13.76 | 1.28 | 36.54  | 0.0837 |
| 0.77 | 50.11 | 20.99 | 1.55 | 34.56  | 0.0954 |
| 0.56 | 40.59 | 14.67 | 1.35 | 21.06  | 0.0881 |
| 0.57 | 41.12 | 15.56 | 1.33 | 89.60  | 0.0860 |
| 0.50 | 36.00 | 12.05 | 1.32 | 19.00  | 0.0885 |
| 0.45 | 31.07 | 11.01 | 1.23 | 21.45  | 0.0836 |
| 0.70 | 47.37 | 23.93 | 1.31 | 40.70  | 0.0799 |
| 0.56 | 40.27 | 18.29 | 1.20 | 19.44  | 0.0757 |
| 0.47 | 33.75 | 15.70 | 1.10 | 9.36   | 0.0705 |
| 0.53 | 38.05 | 12.34 | 1.38 | 55.40  | 0.0925 |
| 0.43 | 29.54 | 11.91 | 1.14 | 13.93  | 0.0771 |
| 0.56 | 40.15 | 15.74 | 1.29 | 43.68  | 0.0833 |
| 0.60 | 42.44 | 17.99 | 1.29 | 28.42  | 0.0815 |
| 0.54 | 38.67 | 13.05 | 1.36 | 26.88  | 0.0886 |
| 0.54 | 38.80 | 14.58 | 1.29 | 71.04  | 0.0840 |
| 0.58 | 41.75 | 12.70 | 1.50 | 32.48  | 0.1004 |
| 0.58 | 41.23 | 18.99 | 1.21 | 41.10  | 0.0753 |
| 0.59 | 41.91 | 17.78 | 1.28 | 67.50  | 0.0805 |
| 0.50 | 35.74 | 13.12 | 1.26 | 47.16  | 0.0832 |
| 0.62 | 43.50 | 18.97 | 1.30 | 61.94  | 0.0803 |

|      |       |       |      |        |        |
|------|-------|-------|------|--------|--------|
| 0.55 | 39.61 | 15.39 | 1.29 | 70.75  | 0.0829 |
| 0.55 | 39.33 | 15.06 | 1.29 | 29.90  | 0.0832 |
| 0.50 | 36.29 | 14.15 | 1.23 | 8.16   | 0.0815 |
| 0.58 | 41.29 | 17.14 | 1.28 | 55.97  | 0.0809 |
| 0.52 | 37.50 | 13.69 | 1.29 | 46.20  | 0.0845 |
| 0.52 | 37.32 | 15.24 | 1.22 | 28.62  | 0.0789 |
| 0.44 | 30.33 | 13.53 | 1.09 | 3.18   | 0.0732 |
| 0.57 | 41.06 | 17.37 | 1.26 | 33.35  | 0.0796 |
| 0.47 | 33.71 | 12.96 | 1.21 | 16.44  | 0.0803 |
| 0.49 | 35.21 | 11.82 | 1.31 | 17.82  | 0.0879 |
| 0.56 | 40.34 | 15.73 | 1.30 | 25.00  | 0.0837 |
| 0.60 | 42.51 | 14.20 | 1.45 | 28.00  | 0.0958 |
| 0.56 | 40.56 | 16.76 | 1.26 | 104.32 | 0.0797 |
| 0.49 | 35.18 | 13.91 | 1.21 | 15.75  | 0.0793 |
| 0.48 | 34.63 | 12.78 | 1.24 | 15.75  | 0.0826 |
| 0.68 | 46.58 | 24.15 | 1.27 | 45.54  | 0.0758 |
| 0.61 | 43.05 | 18.70 | 1.29 | 48.00  | 0.0810 |
| 0.55 | 39.95 | 11.67 | 1.49 | 20.16  | 0.1023 |
| 0.50 | 36.00 | 13.33 | 1.26 | 53.76  | 0.0819 |
| 0.52 | 37.75 | 15.08 | 1.24 | 46.42  | 0.0798 |
| 0.57 | 40.75 | 16.27 | 1.29 | 65.12  | 0.0834 |
| 0.47 | 33.71 | 12.96 | 1.21 | 16.92  | 0.0803 |
| 0.53 | 37.97 | 16.80 | 1.18 | 13.68  | 0.0754 |
| 0.52 | 37.69 | 13.14 | 1.32 | 21.00  | 0.0868 |
| 0.49 | 34.77 | 13.58 | 1.21 | 20.55  | 0.0796 |
| 0.59 | 42.10 | 19.73 | 1.22 | 42.00  | 0.0765 |
| 0.54 | 38.62 | 16.54 | 1.21 | 17.42  | 0.0765 |
| 0.58 | 41.30 | 17.75 | 1.26 | 61.00  | 0.0797 |
| 0.53 | 38.34 | 15.42 | 1.24 | 20.14  | 0.0806 |
| 0.58 | 41.27 | 16.73 | 1.29 | 49.17  | 0.0816 |
| 0.51 | 37.06 | 15.27 | 1.21 | 10.15  | 0.0783 |
| 0.56 | 40.47 | 17.14 | 1.25 | 33.48  | 0.0791 |
| 0.49 | 35.03 | 15.42 | 1.14 | 26.39  | 0.0738 |
| 0.58 | 41.63 | 16.41 | 1.32 | 215.84 | 0.0829 |
| 0.60 | 42.44 | 17.14 | 1.32 | 130.56 | 0.0837 |
| 0.59 | 42.09 | 16.05 | 1.35 | 30.45  | 0.0869 |
| 0.57 | 40.71 | 14.81 | 1.35 | 47.25  | 0.0878 |
| 0.52 | 37.65 | 14.41 | 1.26 | 41.79  | 0.0822 |
| 0.53 | 38.50 | 11.79 | 1.42 | 16.28  | 0.0962 |
| 0.61 | 43.25 | 16.01 | 1.40 | 27.94  | 0.0919 |
| 0.52 | 37.48 | 12.91 | 1.33 | 30.13  | 0.0876 |
| 0.53 | 38.17 | 13.44 | 1.32 | 39.75  | 0.0868 |
| 0.51 | 37.16 | 14.39 | 1.25 | 31.08  | 0.0799 |
| 0.46 | 32.28 | 14.45 | 1.10 | 6.57   | 0.0728 |
| 0.49 | 34.89 | 14.19 | 1.18 | 24.92  | 0.0778 |
| 0.63 | 44.26 | 19.28 | 1.32 | 52.70  | 0.0823 |
| 0.67 | 46.20 | 17.94 | 1.45 | 69.96  | 0.0913 |
| 0.61 | 43.06 | 18.59 | 1.29 | 68.58  | 0.0818 |
| 0.54 | 39.25 | 16.68 | 1.22 | 38.50  | 0.0782 |
| 0.68 | 46.49 | 19.65 | 1.40 | 92.40  | 0.0869 |
| 0.53 | 38.53 | 15.42 | 1.25 | 32.34  | 0.0807 |

|      |       |       |      |        |        |
|------|-------|-------|------|--------|--------|
| 0.48 | 33.95 | 12.44 | 1.24 | 19.20  | 0.0825 |
| 0.48 | 34.11 | 13.96 | 1.17 | 24.48  | 0.0765 |
| 0.61 | 43.42 | 18.76 | 1.30 | 108.03 | 0.0806 |
| 0.64 | 44.60 | 19.38 | 1.33 | 260.40 | 0.0819 |
| 0.59 | 42.02 | 18.19 | 1.27 | 37.25  | 0.0804 |
| 0.60 | 42.74 | 16.41 | 1.36 | 40.32  | 0.0877 |
| 0.54 | 38.63 | 14.67 | 1.28 | 28.80  | 0.0842 |
| 0.59 | 42.21 | 18.98 | 1.25 | 45.82  | 0.0780 |
| 0.59 | 42.15 | 15.65 | 1.37 | 30.80  | 0.0902 |
| 0.59 | 41.93 | 15.31 | 1.38 | 33.33  | 0.0885 |
| 0.59 | 41.89 | 16.09 | 1.34 | 59.20  | 0.0856 |
| 0.49 | 35.20 | 14.52 | 1.18 | 18.36  | 0.0767 |
| 0.48 | 34.31 | 13.57 | 1.19 | 22.23  | 0.0790 |
| 0.56 | 40.00 | 16.19 | 1.27 | 48.06  | 0.0808 |
| 0.57 | 40.88 | 16.74 | 1.28 | 32.64  | 0.0819 |
| 0.53 | 38.37 | 15.39 | 1.24 | 47.70  | 0.0809 |
| 0.53 | 38.50 | 14.22 | 1.30 | 26.84  | 0.0849 |
| 0.56 | 40.37 | 15.04 | 1.33 | 29.29  | 0.0856 |
| 0.55 | 39.61 | 15.19 | 1.29 | 25.75  | 0.0837 |
| 0.53 | 38.47 | 16.80 | 1.19 | 38.41  | 0.0758 |
| 0.49 | 35.49 | 13.67 | 1.23 | 42.84  | 0.0799 |
| 0.63 | 44.35 | 18.42 | 1.35 | 170.28 | 0.0853 |
| 0.55 | 39.90 | 13.88 | 1.36 | 24.24  | 0.0899 |
| 0.60 | 42.67 | 17.19 | 1.33 | 47.25  | 0.0837 |
| 0.50 | 35.73 | 13.22 | 1.25 | 27.15  | 0.0833 |
| 0.56 | 40.10 | 14.21 | 1.36 | 39.25  | 0.0889 |
| 0.59 | 42.26 | 16.59 | 1.34 | 43.56  | 0.0849 |
| 0.53 | 38.50 | 14.52 | 1.28 | 34.32  | 0.0838 |
| 0.66 | 45.89 | 16.40 | 1.50 | 23.45  | 0.0973 |
| 0.52 | 37.73 | 16.57 | 1.18 | 27.83  | 0.0747 |
| 0.56 | 40.19 | 14.24 | 1.36 | 39.20  | 0.0885 |
| 0.58 | 41.33 | 16.73 | 1.29 | 162.88 | 0.0819 |
| 0.51 | 37.01 | 14.51 | 1.24 | 59.01  | 0.0802 |
| 0.64 | 44.94 | 20.89 | 1.29 | 60.48  | 0.0797 |
| 0.51 | 36.51 | 15.20 | 1.19 | 27.00  | 0.0768 |
| 0.54 | 39.12 | 14.32 | 1.31 | 97.28  | 0.0867 |
| 0.53 | 38.17 | 14.21 | 1.29 | 48.75  | 0.0836 |
| 0.58 | 41.41 | 17.94 | 1.25 | 43.47  | 0.0791 |
| 0.61 | 43.19 | 17.35 | 1.34 | 62.00  | 0.0854 |
| 0.50 | 36.00 | 12.96 | 1.27 | 22.88  | 0.0849 |
| 0.61 | 43.39 | 16.89 | 1.37 | 28.56  | 0.0871 |
| 0.56 | 40.35 | 13.60 | 1.40 | 39.78  | 0.0906 |
| 0.53 | 38.44 | 15.06 | 1.26 | 46.08  | 0.0813 |
| 0.51 | 36.77 | 15.13 | 1.20 | 21.80  | 0.0776 |
| 0.48 | 34.75 | 14.81 | 1.16 | 15.54  | 0.0753 |
| 0.60 | 42.82 | 19.60 | 1.25 | 32.70  | 0.0778 |
| 0.58 | 41.48 | 17.48 | 1.27 | 108.68 | 0.0808 |
| 0.53 | 38.26 | 14.74 | 1.27 | 179.92 | 0.0816 |
| 0.60 | 42.75 | 19.03 | 1.27 | 34.50  | 0.0800 |
| 0.64 | 44.70 | 18.42 | 1.37 | 44.54  | 0.0862 |
| 0.65 | 45.26 | 21.21 | 1.30 | 60.48  | 0.0798 |

|      |       |       |      |       |        |
|------|-------|-------|------|-------|--------|
| 0.49 | 34.97 | 13.67 | 1.21 | 25.60 | 0.0789 |
| 0.55 | 39.76 | 17.11 | 1.22 | 67.23 | 0.0774 |
| 0.63 | 44.48 | 16.73 | 1.42 | 28.22 | 0.0912 |
| 0.68 | 46.42 | 22.70 | 1.30 | 88.16 | 0.0795 |
| 0.59 | 42.02 | 14.96 | 1.40 | 59.85 | 0.0898 |
| 0.64 | 44.97 | 19.67 | 1.33 | 49.30 | 0.0841 |
